# Supplementary material for: Drug treatments for covid-19: living systematic review and network meta-analysis
Source: PubMed Central journal article supplement — BMJ. 2020 Jul 30;370:m2980. doi: 10.1136/bmj.m2980 (PMC7390912; doi:10.1136/bmj.m2980), 2020-07-30
Supplement: sier059724_4.w1.pdf [file sier059724_4.w1.pdf]

# Drug treatments for COVID-19: living systematic review and network meta-analysis

## Supplementary Material

| <b>Table of contents</b>                                                                                                                                   | <b>Page</b> |
|------------------------------------------------------------------------------------------------------------------------------------------------------------|-------------|
| Search strategy                                                                                                                                            | 2           |
| Characteristics of included studies                                                                                                                        | 8           |
| Studies included in analysis for each outcome                                                                                                              | 189         |
| Description of studies excluded at full text stage                                                                                                         | 197         |
| Discrepancies between preprint and peer-reviewed publications                                                                                              | 222         |
| Risk of bias assessments                                                                                                                                   | 238         |
| Network plots                                                                                                                                              | 299         |
| Complete network meta-analysis results and GRADE                                                                                                           | 309         |
| Comparative efficacy and safety of baricitinib, ruxolitinib, and tofacitinib:<br>A Bayesian network meta-analysis                                          | 465         |
| Safety and efficacy of selected drugs for treatment of non-severe covid-19,<br>including nirmatrelvir/ritonavir, molnupiravir, remdesivir, and fluvoxamine | 507         |
| Living network meta-analysis protocol and extended methods                                                                                                 | 527         |
| Detailed risk of bias assessment guidance                                                                                                                  | 541         |

For additional study characteristics, trial level data and R code,  
please visit our github:

[https://github.com/covid19lnma/covid19\\_lnma/](https://github.com/covid19lnma/covid19_lnma/)

For detailed summary of findings tables, please visit our website:

<https://www.covid19lnma.com/>

## Search Strategy

**Search purpose:** Systematic search of the COVID-19 literature performed Monday through Friday for the [WHO Database](#). Search strategy as of **05 January 2021**. Searches performed by Tomas Allen, Kavita Kothari, and Martha Knuth.

**Use following commands to pull daily new entries:**

- Entry\_date:( [20210101 TO 20210120])
- Entry\_date:( 20210105)

**Duplicates:** Duplicates are found in EndNote and Distillr using the Wichor method. Further screening is done by expert reviewers but some duplicates may still be in the database.

**Daily Search Strategy:**

| Database                                  | Daily Search Strategy                                                                                                                                                                                                                                                                                                                                                                                                                                    |
|-------------------------------------------|----------------------------------------------------------------------------------------------------------------------------------------------------------------------------------------------------------------------------------------------------------------------------------------------------------------------------------------------------------------------------------------------------------------------------------------------------------|
| Medline<br>(Ovid)<br>1946-                | (coronavir* OR corona virus* OR corona pandemic* OR betacoronavir* OR covid19 OR covid OR nCoV OR novel CoV OR CoV 2 OR CoV2 OR sarscov2 OR sars2 OR 2019nCoV OR wuhan virus*).mp.<br>OR (sars AND cov).mp. OR ((wuhan OR hubei OR huanan) AND (severe acute respiratory OR pneumonia*) AND outbreak*).mp. OR Coronavirus Infections/ OR Coronavirus/ OR betacoronavirus/<br><br>Limits: 2020-                                                           |
| CAB<br>Abstracts<br>(Ovid)<br>1910-       | (coronavir* OR corona virus* OR corona pandemic* OR betacoronavir* OR covid19 OR covid OR nCoV OR novel CoV OR CoV 2 OR CoV2 OR sarscov2 OR sars2 OR 2019nCoV OR wuhan virus*).mp.<br>OR (sars AND cov).mp. OR ((wuhan OR hubei OR huanan) AND (severe acute respiratory OR pneumonia*) AND outbreak*).mp. OR exp Betacoronavirus/                                                                                                                       |
| Global<br>Health<br>(Ovid)<br>1910-       | (coronavir* OR corona virus* OR corona pandemic* OR betacoronavir* OR covid19 OR covid OR nCoV OR novel CoV OR CoV 2 OR CoV2 OR sarscov2 OR sars2 OR 2019nCoV OR wuhan virus*).mp.<br>OR (sars AND cov).mp. OR ((wuhan OR hubei OR huanan) AND (severe acute respiratory OR pneumonia*) AND outbreak*).mp. OR exp Betacoronavirus/                                                                                                                       |
| PsycInfo<br>(Ovid)<br>1806-               | (coronavir* OR corona virus* OR corona pandemic* OR betacoronavir* OR covid19 OR covid OR nCoV OR novel CoV OR CoV 2 OR CoV2 OR sarscov2 OR sars2 OR 2019nCoV OR wuhan virus*).mp.<br>OR (sars AND cov).mp. OR ((wuhan OR hubei OR huanan) AND (severe acute respiratory OR pneumonia*) AND outbreak*).mp.<br><br>Limits: 2020-                                                                                                                          |
| Scopus<br>1960-                           | TITLE-ABS-KEY ( coronavir* OR "corona virus" OR "corona pandemic" OR betacoronavir* OR covid19 OR covid OR nCoV OR "CoV 2" OR cov2 OR sarscov2 OR sars2 OR 2019nCoV OR "novel CoV" OR "wuhan virus" ) OR TITLE-ABS-KEY(sars AND cov) OR ( TITLE-ABS-KEY ( wuhan OR hubei OR huanan ) AND TITLE-ABS-KEY ( "severe acute respiratory" OR pneumonia* ) AND TITLE-ABS-KEY ( outbreak* ) ) AND ( LIMIT-TO ( PUBYEAR , 2021 ) OR LIMIT-TO ( PUBYEAR , 2020 ) ) |
| Academic<br>Search<br>Complete<br>(Ebsco) | TI,AB,SU( ( coronavir* OR "corona virus" OR "corona pandemic" OR betacoronavir* OR covid19 OR covid OR nCoV OR "CoV 2" OR cov2 OR sarscov2 OR sars2 OR 2019nCoV OR "novel CoV" OR "wuhan virus" ) OR (sars AND cov) OR ( ( wuhan OR hubei OR huanan ) AND ( "severe acute respiratory" OR pneumonia* ) AND ( outbreak* ) ) )                                                                                                                             |

|                                                                                                                           |                                                                                                                                                                                                                                                                                                                                                                                                                                                                                                                                                                                                                                                                                                                                                                                                                                                                                                                                                                                                                                                                                                   |
|---------------------------------------------------------------------------------------------------------------------------|---------------------------------------------------------------------------------------------------------------------------------------------------------------------------------------------------------------------------------------------------------------------------------------------------------------------------------------------------------------------------------------------------------------------------------------------------------------------------------------------------------------------------------------------------------------------------------------------------------------------------------------------------------------------------------------------------------------------------------------------------------------------------------------------------------------------------------------------------------------------------------------------------------------------------------------------------------------------------------------------------------------------------------------------------------------------------------------------------|
|                                                                                                                           | Limits: Dec. 2019-, peer-reviewed                                                                                                                                                                                                                                                                                                                                                                                                                                                                                                                                                                                                                                                                                                                                                                                                                                                                                                                                                                                                                                                                 |
| Africa Wide Information (Ebsco)                                                                                           | TI,AB,SU( ( coronavir* OR "corona virus" OR "corona pandemic" OR betacoronavir* OR covid19 OR covid OR ncov OR "CoV 2" OR cov2 OR sarscov2 OR sars2 OR 2019ncov OR "novel CoV" OR "wuhan virus" ) OR (sars AND cov) OR ( ( wuhan OR hubei OR huanan ) AND ( "severe acute respiratory" OR pneumonia* ) AND ( outbreak* ) ) )<br><br>Limits: 2019-,                                                                                                                                                                                                                                                                                                                                                                                                                                                                                                                                                                                                                                                                                                                                                |
| CINAHL (Ebsco)                                                                                                            | TI,AB,SU( ( coronavir* OR "corona virus" OR "corona pandemic" OR betacoronavir* OR covid19 OR covid OR ncov OR "CoV 2" OR cov2 OR sarscov2 OR sars2 OR 2019ncov OR "novel CoV" OR "wuhan virus" ) OR (sars AND cov) OR ( ( wuhan OR hubei OR huanan ) AND ( "severe acute respiratory" OR pneumonia* ) AND ( outbreak* ) ) ) OR ( (MH "Coronavirus") OR (MH "Coronavirus Infections") )<br><br>Limits: Dec. 2019-, peer-reviewed                                                                                                                                                                                                                                                                                                                                                                                                                                                                                                                                                                                                                                                                  |
| ProQuest Central (Proquest) 1952-                                                                                         | TI,AB,SU( ( coronavir* OR "corona virus" OR "corona pandemic" OR betacoronavir* OR covid19 OR covid OR ncov OR "CoV 2" OR cov2 OR sarscov2 OR sars2 OR 2019ncov OR "novel CoV" OR "wuhan virus" ) OR (sars AND cov) OR ( ( wuhan OR hubei OR huanan ) AND ( "severe acute respiratory" OR pneumonia* ) AND ( outbreak* ) ) )<br><br>Limits: Dec. 2019-, peer-reviewed                                                                                                                                                                                                                                                                                                                                                                                                                                                                                                                                                                                                                                                                                                                             |
| <a href="#">China CDC MMWR</a>                                                                                            | Covid OR cov2 OR coronavirus OR "sars cov" OR ncov                                                                                                                                                                                                                                                                                                                                                                                                                                                                                                                                                                                                                                                                                                                                                                                                                                                                                                                                                                                                                                                |
| <a href="#">CDC Reports</a>                                                                                               | Covid OR cov2 OR coronavirus OR "sars cov" OR ncov                                                                                                                                                                                                                                                                                                                                                                                                                                                                                                                                                                                                                                                                                                                                                                                                                                                                                                                                                                                                                                                |
| <a href="#">bioRxiv</a><br><a href="#">medRxiv</a><br><a href="#">chemRxiv</a><br><a href="#">SSRN</a><br><br>(preprints) | Covid OR cov2 OR coronavirus OR "sars cov" OR ncov                                                                                                                                                                                                                                                                                                                                                                                                                                                                                                                                                                                                                                                                                                                                                                                                                                                                                                                                                                                                                                                |
| Embase (Ovid)                                                                                                             | ncov OR (('coronavirus'/exp OR coronavirus) AND ('wuhan'/exp OR wuhan)) OR 'novel coronavirus' OR (('pneumonia'/exp OR pneumonia) AND wuhan:ti,ab) OR 'covid' OR 2019ncov OR 'sars-cov'/exp OR 'sars-cov' OR covid OR (('coronavirus'/exp OR coronavirus) AND novel) OR (('corona virus':ti,ab OR 'coronavirus':ti,ab) AND (outbreak:ti,ab OR epidemic*:ti,ab OR pandemic*:ti,ab OR quaran*:ti,ab OR lockdown*:ti,ab OR syndemic*:ti,ab)) OR hcov OR 'sars virus'/exp OR 'sars virus' OR 'coronavirus disease 2019'/exp OR 'coronavirus disease 2019' OR 'novel coronavirus pneumonia' OR 'covid 19 virus' OR 'severe acute respiratory syndrome coronavirus 2'/exp OR 'severe acute respiratory syndrome coronavirus 2' OR 'coronavirinae'/exp OR 'coronavirinae' OR 'coronavirus infection'/exp OR 'coronavirus infection' OR 'covid19'/exp OR covid19 OR covid2019 OR 'corona pandemic' OR 'sarscov 2' OR 'sarscov-2' OR 'sars co v 2' OR 'social distancing'/exp OR 'social distancing' OR coivd OR 'flatten the curve' OR 'flattening the curve' OR pandoeconom* OR twindemic* OR 'sars voc' |
| Global Index Medicus                                                                                                      | (nCov OR (coronavirus AND wuhan) OR "novel coronavirus" OR (pneumonia AND wuhan) OR covid OR 2019ncov OR "sars-cov " OR covid OR (coronavirus AND novel) OR ("corona virus" OR coronavirus ) AND ( ti:outbreak OR ti:epidemic* OR ti:pandemic* OR ti:quaran* OR ti:synden* OR hcov OR "sars virus")) OR "coronavirus disease 2019" OR " novel coronavirus pneumonia" OR "COVID 19 virus" OR "severe acute respiratory syndrome coronavirus 2" OR Coronavirinae OR                                                                                                                                                                                                                                                                                                                                                                                                                                                                                                                                                                                                                                 |

|                |                                                                                                                                                                                                                                                                                                                                                                                                                                                                                                                                                                                                                                                                                                                                                                                                                                                                                                                                                                                                                                                                                                                                                      |
|----------------|------------------------------------------------------------------------------------------------------------------------------------------------------------------------------------------------------------------------------------------------------------------------------------------------------------------------------------------------------------------------------------------------------------------------------------------------------------------------------------------------------------------------------------------------------------------------------------------------------------------------------------------------------------------------------------------------------------------------------------------------------------------------------------------------------------------------------------------------------------------------------------------------------------------------------------------------------------------------------------------------------------------------------------------------------------------------------------------------------------------------------------------------------|
|                | "Coronavirus infection" OR covid19 OR covid2019 OR lockdown* OR "social distancing" OR "physical distancing" OR "corona pandemic" OR "sarscov 2" OR "sarscov-2" OR "sars co v 2" OR coivd OR "flatten the curve" OR "flattening the curve" OR "sars voc")                                                                                                                                                                                                                                                                                                                                                                                                                                                                                                                                                                                                                                                                                                                                                                                                                                                                                            |
| Web of Science | TI=coronavirus OR TI=covid OR TI=Covid19 OR TI=ncov OR TI=(SARS NEAR/3 COV) OR TI="novel coron*virus" OR TI=2019*nCoV OR TI=2019ncov OR TI=(CORON*VIRUS NEAR/3 (OUTBREAK OR pandemic OR 2019 OR new OR novel)) OR TI=coronavirinae OR TI=coronaviridae OR TI=betacoronavirus OR TI=Sars2 OR TI=COV2 OR TI="corona pandemic" OR ((TI=wuhan OR TI=hubei OR TI=huanan) AND ( TI="severe acute respiratory" OR TI=pneumonia ) AND (TI=outbreak))                                                                                                                                                                                                                                                                                                                                                                                                                                                                                                                                                                                                                                                                                                         |
| PubMed Central | coronavirus[Title] OR "corona virus" [Title] OR "corona pandemic"[Title] OR coronavirinae[Title] OR coronaviridae[Title] OR betacoronavirus[Title] OR covid19[Title] OR covid[Title] OR nCoV[Title] OR "CoV 2"[Title] OR CoV2[Title] OR sars2[Title] OR sarscov2[Title] OR 2019nCoV[Title] OR "novel CoV"[Title] OR "wuhan virus"[Title] OR coronavirus[Abstract] OR "corona virus" [Abstract] OR "corona pandemic"[Abstract] OR coronavirinae[Abstract] OR coronaviridae[Abstract] OR betacoronavirus[Abstract] OR covid19[Abstract] OR covid[Abstract] OR nCoV[Abstract] OR "CoV 2"[Abstract] OR CoV2[Abstract] OR sars2[Abstract] OR sarscov2[Abstract] OR 2019nCoV[Abstract] OR "novel CoV"[Abstract] OR "wuhan virus"[Abstract] OR "COVID-19" [Supplementary Concept] OR "severe acute respiratory syndrome coronavirus 2" [Supplementary Concept] OR ((wuhan[Title] OR hubei[Title] OR huanan[Title]) OR (wuhan[Abstract] OR hubei[Abstract] OR huanan[Abstract])) AND ("severe acute respiratory"[Title] OR pneumonia[Title])) OR (("severe acute respiratory"[Abstract] OR pneumonia[Abstract]) AND (outbreak[Title]) OR outbreak[Abstract]) |
| Science Direct | COVID OR COVID19 OR 2019Ncov OR Ncov OR Coronavirus OR "corona virus" OR (SARS AND Cov)                                                                                                                                                                                                                                                                                                                                                                                                                                                                                                                                                                                                                                                                                                                                                                                                                                                                                                                                                                                                                                                              |
| Wiley Online   | COVID-19 OR nCov OR 2019ncov OR (pneumonia AND wuhan) OR (sars AND cov) OR COVID OR Covid19 OR "corona virus" OR coronavirus OR COV2 OR SARS2 OR coronavirinae OR coronaviridae OR betacoronavirus OR "corona pandemic" OR ((wuhan OR hubei OR huanan) AND ( "severe acute respiratory" OR pneumonia ) AND (outbreak))                                                                                                                                                                                                                                                                                                                                                                                                                                                                                                                                                                                                                                                                                                                                                                                                                               |

### Weekly, Biweekly or Monthly Searches:

| Database                           | Daily Search Strategy                                                                                                                                                                                                                                                                                                                                                                                                                                                                                                                                                                                                                                                                                                                                                                                                                                                                                                                                                                                                                                                                                                                                                             |
|------------------------------------|-----------------------------------------------------------------------------------------------------------------------------------------------------------------------------------------------------------------------------------------------------------------------------------------------------------------------------------------------------------------------------------------------------------------------------------------------------------------------------------------------------------------------------------------------------------------------------------------------------------------------------------------------------------------------------------------------------------------------------------------------------------------------------------------------------------------------------------------------------------------------------------------------------------------------------------------------------------------------------------------------------------------------------------------------------------------------------------------------------------------------------------------------------------------------------------|
| Eurosurveillance (weekly)          | Hand search                                                                                                                                                                                                                                                                                                                                                                                                                                                                                                                                                                                                                                                                                                                                                                                                                                                                                                                                                                                                                                                                                                                                                                       |
| American Chemical Society (weekly) | ncov OR coronavirus OR covid OR 2019ncov OR (SARS AND COV) OR covid19 OR covid2019 OR hcov OR "corona virus"                                                                                                                                                                                                                                                                                                                                                                                                                                                                                                                                                                                                                                                                                                                                                                                                                                                                                                                                                                                                                                                                      |
| Scielo (Web of Science) (weekly)   | TS=nCov OR TS=(coronavirus AND wuhan) OR TS="novel coronavirus" OR TS="nuevo coronavirus" OR TS=((pneumonia OR neumonía) OR AND wuhan) OR TS=covid OR TS=2019ncov OR TS="sars-cov" OR TS=(coronavirus AND novel) OR ((TI="corona virus" OR TI=coronavirus) AND TS=(Wuhan OR outbreak OR epidemic* OR pandemic* OR quaran* OR lockdown* OR Syndemic* OR surto* OR epidemia* OR pandêmica* OU bloqueio* OR brote* OR epidemia* OR pandêmica* OR cuaranatin*OR encierro*)) OR TS=hcov OR TS="sars virus" OR TS="coronavirus disease 2019" OR TS="Enfermedad por coronavirus 2019" OR TS="novel coronavirus pneumonia" OR TS="Nova Pneumonia por Coronavírus" OR TS="severe acute respiratory syndrome coronavirus 2" OR TS=Coronavirinae OR TS="Coronavirus infection" OR TS="infecções por coronavirus" OR TS=covid19 OR TS=covid2019 OR TS="corona pandemic" OR TS="sarscov 2" OR TS="sarscov-2" OR TS="sars co v 2" OR TS="social distancing" OR TS= coivd OR TS="flatten the curve" OR TS="flattening the curve" OR TS=pandoeconom* OR TS=twindemic* OR TS="Distanciamento social" OR TS="distancias sociales" OR TS=" isolamento social " OR TS=confinamiento* OR TS=contenção* |

|                                                          |                                                                                                                                                                                                                                                                                                                                                                                                                                                                                                                                                                                                                                                                                                                                                                                                                                                                                                                          |
|----------------------------------------------------------|--------------------------------------------------------------------------------------------------------------------------------------------------------------------------------------------------------------------------------------------------------------------------------------------------------------------------------------------------------------------------------------------------------------------------------------------------------------------------------------------------------------------------------------------------------------------------------------------------------------------------------------------------------------------------------------------------------------------------------------------------------------------------------------------------------------------------------------------------------------------------------------------------------------------------|
| <a href="#">AIRITI</a><br>(monthly)                      | (( "武漢肺炎" OR "新冠病毒" OR "2019新型冠狀病毒病" OR " 新型冠狀病毒肺炎" OR covid OR coronavirus OR corona OR hcov OR ncov OR covid2019 OR covid19 OR 2019covid)) = All Fields                                                                                                                                                                                                                                                                                                                                                                                                                                                                                                                                                                                                                                                                                                                                                                |
| <a href="#">JMIR</a><br>(monthly)                        | covid OR Ncov OR hcov OR corona OR coronavirus OR sars OR 2019ncov OR covid19 OR covid2019<br><br>Exclude PMC articles                                                                                                                                                                                                                                                                                                                                                                                                                                                                                                                                                                                                                                                                                                                                                                                                   |
| Russian Science Index (Web of Science) (monthly)         | TS=nCov OR TS=(coronavirus AND wuhan) OR TS="novel coronavirus" OR TS=(pneumonia AND wuhan) OR TS=covid OR TS=2019ncov OR TS="sars-cov" OR TS=(coronavirus AND novel) OR ((TI="corona virus" OR TI=coronavirus) AND (TS=Wuhan OR TS=outbreak OR TS=epidemic* OR TS=pandemic* OR TS=quaran* OR TS=lockdown* OR TS=Syndemic*)) OR TS=hcov OR TS="sars virus" OR TS="coronavirus disease 2019" OR TS="novel coronavirus pneumonia" OR TS="severe acute respiratory syndrome coronavirus 2" OR TS=Coronavirinae OR TS="Coronavirus infection" OR TS=covid19 OR TS=covid2019 OR TS="corona pandemic" OR TS="sarscov 2" OR TS="sarscov-2" OR TS="sars co v 2" OR TS="social distancing" OR TS= coivd OR TS="flatten the curve" OR TS="flattening the curve" OR TS=pandoeconom* OR TS=twindemic*<br><br>TS= коронавирус*                                                                                                        |
| Korean Science Citation Index (Web of Science) (monthly) | TS=nCov OR TS=(coronavirus AND wuhan) OR TS="novel coronavirus" OR TS=(pneumonia AND wuhan) OR TS=covid OR TS=2019ncov OR TS="sars-cov" OR TS=(coronavirus AND novel) OR ((TI="corona virus" OR TI=coronavirus) AND (TS=Wuhan OR TS=outbreak OR TS=epidemic* OR TS=pandemic* OR TS=quaran* OR TS=lockdown* OR TS=Syndemic*)) OR TS=hcov OR TS="sars virus" OR TS="coronavirus disease 2019" OR TS="novel coronavirus pneumonia" OR TS="severe acute respiratory syndrome coronavirus 2" OR TS=Coronavirinae OR TS="Coronavirus infection" OR TS=covid19 OR TS=covid2019 OR TS="corona pandemic" OR TS="sarscov 2" OR TS="sarscov-2" OR TS="sars co v 2" OR TS="social distancing" OR TS= coivd OR TS="flatten the curve" OR TS="flattening the curve" OR TS=pandoeconom* OR TS=twindemic*<br><br>TS="코로나" OR TS="코로나2019" OR TS="코로나19" OR TS=" 코로나바이러스" OR TS="코로나바이러스 2019" OR TS="코로나바이러스 19" OR TS="사스" OR TS=" 전염병" |
| Oxford Academic Group (biweekly)                         | Covid OR Coronavirus OR SARS OR Ncov                                                                                                                                                                                                                                                                                                                                                                                                                                                                                                                                                                                                                                                                                                                                                                                                                                                                                     |
| Jstage (biweekly)                                        | Covid OR Coronavirus                                                                                                                                                                                                                                                                                                                                                                                                                                                                                                                                                                                                                                                                                                                                                                                                                                                                                                     |
| Mary Ann Liebert (biweekly)                              | "2019ncov" OR nCov OR (pneumonia AND wuhan) OR "corona virus" OR SARS OR COVID OR CORONAVIRUS                                                                                                                                                                                                                                                                                                                                                                                                                                                                                                                                                                                                                                                                                                                                                                                                                            |
| Sage Publications (biweekly)                             | [All "2019ncov"] OR [All ncov] OR [[All pneumonia] AND [All wuhan]] OR [All "corona virus"] OR [All sars] OR [All covid] OR [All coronavirus ] OR [All sars2] OR [All cov2] OR [All "corona pandemic"] OR [All coronavirinae] OR [All coronaviridae] OR [All betacoronavirus]                                                                                                                                                                                                                                                                                                                                                                                                                                                                                                                                                                                                                                            |
| Taylor and Francis (biweekly)                            | [Publication Title: coronavirus] OR [Publication Title: "corona virus"] OR [Publication Title: covid] OR [Publication Title: ncov] OR [Publication Title: 2019ncov] OR [[Publication Title: pneumonia] AND [Publication Title: wuhan]] OR [[Publication Title: sars] AND [Publication Title: cov]] OR [Publication Title: coronavirinae] OR [Publication Title: coronaviridae] OR [Publication Title: betacoronavirus] OR [Publication Title: sars2] OR [Publication Title: cov2] OR [Publication Title: "corona pandemic"]                                                                                                                                                                                                                                                                                                                                                                                              |
| BioMed Central (biweekly)                                | 'COVID-19 OR Coronavirus OR "corona virus" OR covid OR nCov OR 2019nCov OR (pneumonia AND wuhan) OR (SARS AND COV) OR coronavirinae OR coronaviridae OR betacoronavirus OR SARS2 OR COV2 O "corona pandemic"                                                                                                                                                                                                                                                                                                                                                                                                                                                                                                                                                                                                                                                                                                             |
| MDPI (biweekly)                                          | 2019ncov OR nCov OR COVID OR coronavirus OR "corona virus" OR (pneumonia AND wuhan) OR (SARS AND COV) OR COVID-19 OR Sars-Cov-2 OR Cov2 OR SARS2 OR coronavirinae OR coronaviridae OR betacoronavirus OR "corona pandemic"                                                                                                                                                                                                                                                                                                                                                                                                                                                                                                                                                                                                                                                                                               |

|  |  |
|--|--|
|  |  |
|--|--|

## Characteristics of included studies

**Table S1:** Characteristics of included trials

| Study                                                    | Publication status<br>Registration          | n   | Country       | Mean age | % Male | Comorbidities                                                                                                  | Type of care | Severity                                | % Mechanical ventilation (at baseline) | Detailed ventilation (%) | Treatments (dose and duration)                                                                                                                                                                        | Outcomes                                                                                 |
|----------------------------------------------------------|---------------------------------------------|-----|---------------|----------|--------|----------------------------------------------------------------------------------------------------------------|--------------|-----------------------------------------|----------------------------------------|--------------------------|-------------------------------------------------------------------------------------------------------------------------------------------------------------------------------------------------------|------------------------------------------------------------------------------------------|
| ARCHITECTS_ NCT04412772, 2021<br>ARCHITECTS <sup>1</sup> | Meta-analysis<br>NCT04412772                | 21  | United States | 61.5     | 57.1   | NR                                                                                                             | Inpatient    | Severe (100%)                           | NR                                     | NR                       | tocilizumab (8 mg/kg (up to 800 mg) single dose)<br>placebo                                                                                                                                           | Mortality<br>Duration of ventilation                                                     |
| Abbasi, 2021 <sup>2</sup>                                | Pre-print<br>IRCT20201003048904N2           | 263 | Iran          | 57.2     | 50.6   | Chronic pulmonary disease (6.8%)<br>Cardiovascular disease (19.0%)<br>Diabetes (25.9%)<br>Hypertension (31.2%) | Inpatient    | NR                                      | NR                                     | NR                       | sitagliptin (100mg once daily for 5 days)<br>spironolactone (100mg once daily for 5 days)<br>sitagliptin (100 mg daily for 5 days)<br>spironolactone (100 mg daily for 5 days)<br>standard care       | Mortality<br>Mechanical ventilation<br>Duration of hospitalization<br>ICU length of stay |
| Abbass, 2021 <sup>3</sup>                                | Peer-reviewed publication<br>ISRCTN21085622 | 120 | Egypt         | 44.7     | 53.3   | Asthma (1.7%)<br>Cardiovascular disease (75.8%)<br>Diabetes (18.3%)                                            | Inpatient    | Mild/Moderate (38.3%)<br>Severe (61.7%) | 0                                      | Iv (0.0%)                | daclatasvir (60 mg once daily for 10 days)<br>sofosbuvir (400 mg once daily for 10 days)<br>ravidasvir (200 mg once daily for 10 days)<br>sofosbuvir (400 mg once daily for 10 days)<br>standard care | Mortality<br>Mechanical ventilation<br>Viral clearance                                   |
| Abd-Elsalam_1, 2020 <sup>4</sup>                         | Peer-reviewed publication<br>NCT04353336    | 194 | Egypt         | 40.7     | 58.8   | Chronic heart failure or prolonged qt interval on                                                              | Inpatient    | NR                                      | NR                                     | NR                       | hydroxychloroquine (200 mg twice daily for 15 days)<br>standard care                                                                                                                                  | Mortality<br>Mechanical ventilation<br>Duration of hospitalization                       |

| Study                             | Publication status<br>Registration       | n   | Country | Mean age | % Male | Comorbidities                            | Type of care | Severity                                                           | % Mechanical ventilation (at baseline) | Detailed ventilation (%) | Treatments (dose and duration)                                                                                                                 | Outcomes                                                              |
|-----------------------------------|------------------------------------------|-----|---------|----------|--------|------------------------------------------|--------------|--------------------------------------------------------------------|----------------------------------------|--------------------------|------------------------------------------------------------------------------------------------------------------------------------------------|-----------------------------------------------------------------------|
|                                   |                                          |     |         |          |        | electrocardiogram (0.0%)                 |              |                                                                    |                                        |                          |                                                                                                                                                | on<br>Time to symptom/clinical improvement<br>Time to viral clearance |
| Abd-El salam_2, 2020 <sup>5</sup> | Peer-reviewed publication<br>NCT04447534 | 191 | Egypt   | 43.6     | 60.7   | Diabetes (13.6%)<br>Hypertension (19.4%) | Inpatient    | Mild/Moderate (70.2%)<br>Severe (29.8%)<br>Severe: Critical (9.9%) | NR                                     | NR                       | hydroxychloroquine (200 mg twice daily for 6 days) zinc (220 mg twice daily for 15 days)<br>hydroxychloroquine (200 mg twice daily for 6 days) | Mortality<br>Mechanical ventilation<br>Duration of hospitalization    |
| Abd-El salam_3, 2021 <sup>6</sup> | Pre-print<br>NCT04403555                 | 164 | Egypt   | 40.9     | 50     | Cardiac problem (0.0%)                   | NR           | NR                                                                 | NR                                     | NR                       | ivermectin (12 mg tablets daily for 3 days)<br>standard care                                                                                   | Mortality<br>Mechanical ventilation<br>Duration of hospitalization    |
| Abd-El salam_4, 2021 <sup>7</sup> | Peer-reviewed publication<br>NCT04345419 | 209 | Egypt   | 53.5     | 59.5   | Diabetes (33.0%)<br>Hypertension (34.0%) | Inpatient    | NR                                                                 | NR                                     | NR                       | remdesivir (100 mg once daily for 10 days)<br>standard care                                                                                    | Mortality<br>Mechanical ventilation<br>Duration of hospitalization    |

| Study                             | Publication status<br>Registration       | n   | Country | Mean age | % Male | Comorbidities                                                     | Type of care                         | Severity                               | % Mechanical ventilation<br>(at baseline) | Detailed ventilation (%) | Treatments (dose and duration)                                                                                   | Outcomes                                                            |
|-----------------------------------|------------------------------------------|-----|---------|----------|--------|-------------------------------------------------------------------|--------------------------------------|----------------------------------------|-------------------------------------------|--------------------------|------------------------------------------------------------------------------------------------------------------|---------------------------------------------------------------------|
| Abdeen, 2021 <sup>8</sup>         | Peer-reviewed publication                | 16  | Israel  | NR       | NR     | NR                                                                | Inpatient                            | Mild/Moderate (100.0%)                 | NR                                        | NR                       | colchicine (1 mg twice a day on day 1 and 0.5 mg twice a day for 7 ± 4 days thereafter)<br>standard care         | NR                                                                  |
| Abdeen, 2021 <sup>8</sup>         | Peer-reviewed publication                | 17  | Israel  | NR       | NR     | NR                                                                | Inpatient<br>Intensive care (100.0%) | Severe (100%)                          | NR                                        | NR                       | tocilizumab (single intravenous infusion of 8 mg/kg up to a total dose of 800 mg over one hour)<br>standard care | NR                                                                  |
| Abdelalim, 2021 <sup>9</sup>      | Peer-reviewed publication<br>NCT04484493 | 108 | Egypt   | 29       | 46     | Diabetes (16.0%)<br>Hypertension (14.0%)                          | Inpatient (31.0%)                    | Mild/Moderate (94.0%)<br>Severe (6.0%) | NR                                        | NR                       | intranasal corticosteroid spray (100 µg in each nostril once daily for 3 weeks)<br>standard care                 | NR                                                                  |
| Abdulmir, 2021 <sup>10</sup>      | Meta-analysis<br>IRCT20111224008507N3    | 0   | Iran    | NR       | NR     | NR                                                                | Inpatient                            | Severe (100%)                          | NR                                        | NR                       | ivermectin (0.2 mg/kg on day 2)<br>standard care                                                                 | Duration of hospitalization<br>Time to symptom/clinical improvement |
| Abdulmir_2, 2021 <sup>11 12</sup> | Pre-print<br>NCT04753619                 | 150 | Iraq    | 49.3     | 53.3   | Asthma (0.7%)<br>Ischemic heart disease (1.3%)<br>Diabetes (8.0%) | NR                                   | Mild/Moderate (66.6%)                  | NR                                        | NR                       | niclosamide (4 g/day for 1 day and then 3g/day in 3 divided doses for 7 days)<br>standard care                   | Mortality<br>Time to symptom/clinical improvement                   |

| Study                                   | Publication status<br>Registration                          | n   | Country            | Mean age | % Male | Comorbidities                                                                            | Type of care                        | Severity              | % Mechanical ventilation (at baseline) | Detailed ventilation (%)        | Treatments (dose and duration)                                                                                                                                                                                                                                           | Outcomes                                                                                                                                                                                            |
|-----------------------------------------|-------------------------------------------------------------|-----|--------------------|----------|--------|------------------------------------------------------------------------------------------|-------------------------------------|-----------------------|----------------------------------------|---------------------------------|--------------------------------------------------------------------------------------------------------------------------------------------------------------------------------------------------------------------------------------------------------------------------|-----------------------------------------------------------------------------------------------------------------------------------------------------------------------------------------------------|
|                                         |                                                             |     |                    |          |        | Hypertension (12.7%)                                                                     |                                     |                       |                                        |                                 |                                                                                                                                                                                                                                                                          |                                                                                                                                                                                                     |
| Abulmeaty, 2021 <sup>13</sup>           | Peer-reviewed publication<br>NCT04323228, SCTR No. 20092202 | 52  | Saudi Arabia       | 48.6     | 63.6   | NR                                                                                       | Inpatient                           | NR                    | NR                                     | NR                              | selenium (15 µg)<br>vitamin A (1500 µg)<br>vitamin C (250 µg)<br>vitamin E (90 µg) zinc (7.5 mg)<br>placebo                                                                                                                                                              | NR                                                                                                                                                                                                  |
| Ader_1, 2021<br>DisCoVeRy <sup>14</sup> | Peer-reviewed publication<br>NCT04315948                    | 603 | France, Luxembourg | 63       | 71.7   | Chronic pulmonary disease (15.1%)<br>Chronic cardiac disease (25.9%)<br>Diabetes (21.9%) | Inpatient<br>Intensive care (43.6%) | Mild/Moderate (63.8%) | 95.4                                   | Unspecified ventilation (95.4%) | lopinavir-ritonavir (400 mg/100 mg every 12 hours for 14 days)<br>interferon beta-1a (subcutaneous) (44 µg on days 1, 3, and 6)<br>lopinavir-ritonavir (400 mg/100 mg every 12 hours for 14 days)<br>hydroxychloroquine (400 mg once daily for 10 days)<br>standard care | Mortality<br>Mechanical ventilation<br>Adverse effects leading to discontinuation<br>Viral clearance<br>Duration of hospitalization<br>Ventilator-free days<br>Time to symptom/clinical improvement |

| Study                                   | Publication status<br>Registration                | n   | Country                                                    | Mean age | % Male | Comorbidities                                                                            | Type of care                        | Severity               | % Mechanical ventilation (at baseline) | Detailed ventilation (%)                                                                               | Treatments (dose and duration)                                                                                                     | Outcomes                                                                                                                           |
|-----------------------------------------|---------------------------------------------------|-----|------------------------------------------------------------|----------|--------|------------------------------------------------------------------------------------------|-------------------------------------|------------------------|----------------------------------------|--------------------------------------------------------------------------------------------------------|------------------------------------------------------------------------------------------------------------------------------------|------------------------------------------------------------------------------------------------------------------------------------|
| Ader_2, 2021<br>DisCoVeRy <sup>15</sup> | Pre-print<br>NCT04315948                          | 857 | Austria,<br>Belgium,<br>France,<br>Luxembourg,<br>Portugal | 63.5     | 69.6   | Chronic pulmonary disease (17.6%)<br>Chronic cardiac disease (27.5%)<br>Diabetes (26.1%) | Inpatient<br>Intensive care (43.9%) | Mild/Moderate (60.6%)  | 39.2                                   | Nasal canula, face mask (51.1%)<br>High-flow oxygen (17.8%)<br>Niv (3.7%)<br>Iv (17.7%)<br>Ecmo (0.4%) | remdesivir (100 mg once daily for 10 days)<br>standard care                                                                        | Mortality<br>Mechanical ventilation<br>Duration of hospitalization<br>Ventilator-free days<br>Time to symptom/clinical improvement |
| Ahmadi, 2021 <sup>16</sup>              | Peer-reviewed publication<br>IRCT20200408046990N1 | 60  | Iran                                                       | 43.1     | 58.3   | Chronic lung disease (0.0%)<br>Heart failure (0.0%)                                      | Outpatient                          | NR                     | NR                                     | NR                                                                                                     | nanocurcumin (80 mg twice daily for 2 weeks)<br>placebo                                                                            | Admission to hospital<br>Time to symptom/clinical improvement                                                                      |
| Ahmed, 2020 <sup>17</sup>               | Peer-reviewed publication                         | 72  | Bangladesh                                                 | 42       | 46     | Ischemic heart disease (0.0%)<br>Heart failure (0.0%)<br>Cardiomyopathy (0.0%)           | Inpatient                           | Mild/Moderate (100.0%) | 0                                      | Supplemental oxygen, niv, or iv (0.0%)                                                                 | ivermectin (12 mg once daily for 5 days)<br>doxycycline (12 mg single dose)<br>ivermectin (12 mg once daily for 5 days)<br>placebo | Mechanical ventilation<br>Viral clearance<br>Duration of hospitalization<br>Time to viral clearance                                |

| Study                               | Publication status<br>Registration                               | n   | Country | Mean age | % Male | Comorbidities                                              | Type of care | Severity      | % Mechanical ventilation (at baseline) | Detailed ventilation (%) | Treatments (dose and duration)                                                                                                                                                                                                                                                                                                                                                                                                                                                                                                                                         | Outcomes                                                           |
|-------------------------------------|------------------------------------------------------------------|-----|---------|----------|--------|------------------------------------------------------------|--------------|---------------|----------------------------------------|--------------------------|------------------------------------------------------------------------------------------------------------------------------------------------------------------------------------------------------------------------------------------------------------------------------------------------------------------------------------------------------------------------------------------------------------------------------------------------------------------------------------------------------------------------------------------------------------------------|--------------------------------------------------------------------|
| Alamdari, 2021 <sup>18</sup>        | Peer-reviewed publication<br>IRCT20191228045924N120, NCT04370288 | 223 | Iran    | 62.6     | 54.7   | NR                                                         | Inpatient    | Severe (100%) | NR                                     | NR                       | methylene blue (methylene blue syrup 1 mg/kg every 8 hours for two days, followed by 1 mg/kg every 12 hours for the next 12 days)<br>standard care (supplemental oxygen, antiviral agents (Remdesivir 200 mg on the first day and 100 mg for 4 days, and IFN- $\beta$ 44 $\mu$ g/sc, daily for 3 doses), intravenous fluids, antibiotics (Azithromycin 500mg/day, 5 days, Meropenem 1 gr, TDS, 7-10 days, Ceftriaxone 1 gr, BID, 7 days, and Vancomycin 1 gr, BID, 7-10 days), anticoagulants (up to discharge), corticosteroids (Dexamethasone 8 mg/day for 10 days)) | Mortality<br>Duration of hospitalization                           |
| Alavi-Moghaddam, 2021 <sup>19</sup> | Pre-print<br>IRCT20200328046882N1                                | 57  | Iran    | 57.4     | 66.7   | Pulmonary disease (7.0%)<br>Cardiovascular disease (19.3%) | Inpatient    | NR            | NR                                     | NR                       | sofosbuvir (400 mg single dose)<br>interferon beta-1a (subcutaneous) (12 Mu (44 microgram) on day                                                                                                                                                                                                                                                                                                                                                                                                                                                                      | Mortality<br>Mechanical ventilation<br>Duration of hospitalization |

| Study                         | Publication status<br>Registration                | n   | Country | Mean age | % Male | Comorbidities                                                                              | Type of care | Severity | % Mechanical ventilation (at baseline) | Detailed ventilation (%)               | Treatments (dose and duration)                                                                                                                      | Outcomes                                          |
|-------------------------------|---------------------------------------------------|-----|---------|----------|--------|--------------------------------------------------------------------------------------------|--------------|----------|----------------------------------------|----------------------------------------|-----------------------------------------------------------------------------------------------------------------------------------------------------|---------------------------------------------------|
|                               |                                                   |     |         |          |        | Diabetes (29.8%)<br>Hypertension (21.1%)                                                   |              |          |                                        |                                        | 1 and then every other day) lopinavir-ritonavir (200/50 mg twice per day)                                                                           | on Time to symptom/clinical improvement           |
| Algahtani, 2021 <sup>20</sup> | Peer-reviewed publication<br>NCT04860219          | 54  | Egypt   | 48.6     | 59.3   | Bronchial hyperactivity (0.0%)<br>Pre-existing respiratory diseases (0.0%)                 | Inpatient    | NR       | NR                                     | NR                                     | lactoferrin (200 mg once daily) (200 mg once daily for 7 days)<br>lactoferrin (200 mg twice daily) (200 mg twice daily for 7 days)<br>standard care | NR                                                |
| Alizadeh, 2021 <sup>21</sup>  | Peer-reviewed publication<br>IRCT20200922048804N1 | 40  | Iran    | 35.9     | 54.8   | Copd, sleep apnea (0.0%)<br>Heart disease (0.0%)<br>Diabetes (0.0%)<br>Hypertension (0.0%) | Outpatient   | NR       | NR                                     | NR                                     | melatonin (6 mg daily for 2 weeks)<br>standard care                                                                                                 | NR                                                |
| Altay, 2020 <sup>22</sup>     | Pre-print<br>NCT04573153                          | 100 | Turkey  | 35.6     | 60     | Cardiovascular disease (0.0%)<br>Diabetes (5.0%)<br>Hypertension (2.0%)                    | Outpatient   | NR       | 0                                      | Supplemental oxygen, niv, or iv (0.0%) | L-carnitine tartrate (24 g/day total, given twice daily, for 14 days) N-acetylcysteine ()<br>nicotinamide riboside ()<br>serine ()<br>placebo       | Mortality<br>Time to symptom/clinical improvement |

| Study                                  | Publication status<br>Registration                  | n   | Country       | Mean age | % Male | Comorbidities                                                                                                                                                                                                     | Type of care | Severity               | % Mechanical ventilation (at baseline) | Detailed ventilation (%)       | Treatments (dose and duration)                                 | Outcomes                                                                                                                                                                                  |
|----------------------------------------|-----------------------------------------------------|-----|---------------|----------|--------|-------------------------------------------------------------------------------------------------------------------------------------------------------------------------------------------------------------------|--------------|------------------------|----------------------------------------|--------------------------------|----------------------------------------------------------------|-------------------------------------------------------------------------------------------------------------------------------------------------------------------------------------------|
| Aman, 2021 <sup>23</sup>               | Peer-reviewed publication<br>EudraCT 2020–001236–10 | 400 | Netherlands   | 64       | 68.6   | Copd or asthma (18.4%)<br>Pre-existing severe pulmonary disease (0.0%)<br>Cardiovascular disease (21.6%)<br>Heart failure (3.1%)<br>Pre-existing heart failure (0.0%)<br>Diabetes (24.7%)<br>Hypertension (37.7%) | Inpatient    | Severe (100%)          | NR                                     | Supplemental oxygen (100.0%)   | imatinib (400 mg once daily for 10 days)<br>placebo            | Mortality<br>Mechanical ventilation<br>Adverse effects leading to discontinuation<br>Duration of hospitalization<br>ICU length of stay<br>Ventilator-free days<br>Duration of ventilation |
| Amaravadi, 2021<br>PATCH <sup>24</sup> | Pre-print<br>NCT04329923                            | 34  | United States | 53       | 26.5   | Asthma (11.8%)<br>Diabetes (8.8%)<br>Hypertension (20.6%)                                                                                                                                                         | Outpatient   | Mild/Moderate (100.0%) | 0                                      | Unspecified ventilation (0.0%) | hydroxychloroquine (200 mg twice daily for 14 days)<br>placebo | Mortality<br>Admission to hospital<br>Viral clearance<br>Time to symptom/clinical improvement                                                                                             |

| Study                                  | Publication status<br>Registration       | n   | Country                                                                                     | Mean age | % Male | Comorbidities                                                                                                  | Type of care                         | Severity               | % Mechanical ventilation (at baseline) | Detailed ventilation (%)                                      | Treatments (dose and duration)                                                                                                                                                 | Outcomes                                                                                                                                    |
|----------------------------------------|------------------------------------------|-----|---------------------------------------------------------------------------------------------|----------|--------|----------------------------------------------------------------------------------------------------------------|--------------------------------------|------------------------|----------------------------------------|---------------------------------------------------------------|--------------------------------------------------------------------------------------------------------------------------------------------------------------------------------|---------------------------------------------------------------------------------------------------------------------------------------------|
| Amra, 2021 <sup>25</sup>               | Pre-print<br>IRCT20170207032444N3        | 60  | Iran                                                                                        | 62.4     | 54.9   | Pulmonary disease (5.9%)<br>Ischemic heart disease (9.8%)<br>Diabetes (37.2%)<br>Hypertension (33.3%)          | Inpatient                            | Severe (100%)          | 0                                      | Mechanical ventilation (0.0%)                                 | thalidomide (100 mg daily for 14 days)<br>standard care                                                                                                                        | Mortality<br>Mechanical ventilation                                                                                                         |
| Ananworanich, 2021 <sup>26</sup>       | Peer-reviewed publication<br>NCT04504032 | 497 | United States                                                                               | 49       | 39.9   | Chronic pulmonary disease, copd, pulmonary hypertension (6.1%)<br>Diabetes (27.7%)<br>Hypertension (51.8%)     | Outpatient                           | Mild/Moderate (100.0%) | 0                                      | Unspecified ventilation (0.0%)                                | rivaroxaban (10 mg daily for 21 days)<br>placebo                                                                                                                               | Mortality<br>Mechanical ventilation<br>Admission to hospital<br>Adverse effects leading to discontinuation<br>Clinically important bleeding |
| Angus, 2020<br>REMAP-CAP <sup>27</sup> | Peer-reviewed publication<br>NCT02735707 | 403 | Australia, Canada, Ireland, France, Netherlands, New Zealand, United Kingdom, United States | 59.9     | 71.1   | Respiratory disease (19.5%)<br>Asthma/copd (16.1%)<br>Severe cardiovascular disease (7.3%)<br>Diabetes (32.1%) | Inpatient<br>Intensive care (100.0%) | Severe (100%)          | 99.7                                   | High-flow (14.6%)<br>Niv (29.7%)<br>Iv (55.5%)<br>Ecmo (0.8%) | hydrocortisone (fixed-dose) (50 mg four times daily for 7 days)<br>hydrocortisone (shock-dependent) (50 mg four times daily while in shock for up to 28 days)<br>standard care | Mortality<br>Mechanical ventilation<br>Duration of hospitalization<br>ICU length of stay                                                    |

| Study                                  | Publication status<br>Registration                 | n   | Country                                                                                                                      | Mean age | % Male | Comorbidities                                                                            | Type of care                         | Severity      | % Mechanical ventilation (at baseline) | Detailed ventilation (%)                                                                            | Treatments (dose and duration)                                                                                                                                                                                                                                                                                                                                                                                                                                                                          | Outcomes                                                                                                                                    |
|----------------------------------------|----------------------------------------------------|-----|------------------------------------------------------------------------------------------------------------------------------|----------|--------|------------------------------------------------------------------------------------------|--------------------------------------|---------------|----------------------------------------|-----------------------------------------------------------------------------------------------------|---------------------------------------------------------------------------------------------------------------------------------------------------------------------------------------------------------------------------------------------------------------------------------------------------------------------------------------------------------------------------------------------------------------------------------------------------------------------------------------------------------|---------------------------------------------------------------------------------------------------------------------------------------------|
| Ansarin, 2020 <sup>28</sup>            | Peer-reviewed publication<br>IRCT202003117046797N4 | 78  | Iran                                                                                                                         | 59.8     | 55.1   | Chronic respiratory diseases (0.0%)<br>Diabetes (33.3%)<br>Hypertension (50.0%)          | Inpatient                            | Severe (100%) | NR                                     | NR                                                                                                  | bromhexine hydrochloride (8 mg three times daily for 14 days)<br>standard care                                                                                                                                                                                                                                                                                                                                                                                                                          | Mortality<br>Mechanical ventilation<br>Duration of hospitalization                                                                          |
| Arabi, 2021<br>REMAP-CAP <sup>29</sup> | Peer-reviewed publication<br>NCT02735707           | 726 | United Kingdom, Canada, Saudi Arabia, Netherlands, United States, Australia, Ireland, France, New Zealand, Germany, Portugal | 60.5     | 70.4   | Respiratory disease (24.6%)<br>Severe cardiovascular disease (12.1%)<br>Diabetes (34.5%) | Inpatient<br>Intensive care (100.0%) | Severe (100%) | 99.4                                   | None or supplemental oxygen (0.6%)<br>High-flow (26.4%)<br>Niv (40.5%)<br>Iv (32.5%)<br>Ecmo (0.0%) | lopinavir-ritonavir (400 mg-100 mg every 12 hours for a minimum of 5 days up to 14 days or until ICU discharge)<br>hydroxychloroquine (two loading doses of 800 mg 6 hours apart followed 6 hours later by 400 mg twice a day for 6 days)<br>hydroxychloroquine (two loading doses of 800 mg 6 hours apart followed 6 hours later by 400 mg twice a day for 6 days)<br>lopinavir-ritonavir (400 mg-100 mg every 12 hours for a minimum of 5 days up to 14 days or until ICU discharge)<br>standard care | Mortality<br>Mechanical ventilation<br>Duration of hospitalization<br>ICU length of stay<br>Ventilator-free days<br>Time to viral clearance |

| Study                      | Publication status<br>Registration       | n   | Country    | Mean age | % Male | Comorbidities                                                                                                                                                 | Type of care | Severity                               | % Mechanical ventilation (at baseline) | Detailed ventilation (%) | Treatments (dose and duration)                                                                                                                                                                                                                                                                                                                                                                       | Outcomes                                                        |
|----------------------------|------------------------------------------|-----|------------|----------|--------|---------------------------------------------------------------------------------------------------------------------------------------------------------------|--------------|----------------------------------------|----------------------------------------|--------------------------|------------------------------------------------------------------------------------------------------------------------------------------------------------------------------------------------------------------------------------------------------------------------------------------------------------------------------------------------------------------------------------------------------|-----------------------------------------------------------------|
| Aref, 2021 <sup>30</sup>   | Peer-reviewed publication<br>NCT04716569 | 114 | Egypt      | 45.1     | 71.9   | Copd (1.0%)<br>Bronchial asthma (2.6%)<br>Interstitial pulmonary fibrosis (2.6%)<br>Cerebrovascular stroke (3.5%)<br>Diabetes (12.3%)<br>Hypertension (17.5%) | Outpatient   | Mild/Moderate (100.0%)                 | 0                                      | Iv (0.0%)                | ivermectin nasal spray (twice daily (70 µg/mL per puff))<br>standard care                                                                                                                                                                                                                                                                                                                            | Time to symptom/clinical improvement<br>Time to viral clearance |
| Arefin, 2021 <sup>31</sup> | Peer-reviewed publication<br>NCT04549376 | 189 | Bangladesh | 44       | 84.1   | NR                                                                                                                                                            | Inpatient    | Mild/Moderate (91.5%)<br>Severe (1.6%) | NR                                     | NR                       | povidone-iodine nasal irrigation (0.4%) (single application)<br>povidone-iodine nasal irrigation (0.5%) (single application)<br>povidone-iodine nasal irrigation (0.6%) (single application)<br>povidone-iodine nasal spray (0.5%) (single application)<br>povidone-iodine nasal spray (0.6%) (single application)<br>distilled water nasal irrigation (single application)<br>distilled water nasal | NR                                                              |

| Study                                                 | Publication status<br>Registration                | n   | Country | Mean age | % Male | Comorbidities                                                                    | Type of care | Severity | % Mechanical ventilation (at baseline) | Detailed ventilation (%) | Treatments (dose and duration)                                                                                                | Outcomes              |
|-------------------------------------------------------|---------------------------------------------------|-----|---------|----------|--------|----------------------------------------------------------------------------------|--------------|----------|----------------------------------------|--------------------------|-------------------------------------------------------------------------------------------------------------------------------|-----------------------|
|                                                       |                                                   |     |         |          |        |                                                                                  |              |          |                                        |                          | spray (single application)                                                                                                    |                       |
| Arruda, 2021<br>ARTAN-C19 <sup>32</sup>               | Pre-print<br>NCT04712357                          | 227 | Brazil  | 38       | 35.4   | Asthma (6.3%)<br>Heart disease (3.1%)<br>Diabetes (9.8%)<br>Hypertension (17.0%) | Outpatient   | NR       | NR                                     | NR                       | emtricitabine (300 mg and 200 mg once daily for 10 days) tenofovir ()<br>tenofovir (300 mg once daily for 10 days)<br>placebo | Admission to hospital |
| Asadi, 2021 <sup>33</sup>                             | Peer-reviewed publication<br>IRCT20200324046850N3 | 80  | Iran    | 47.3     | 55.8   | Cardiovascular diseases (12.3%)<br>Diabetes (16.4%)<br>Hypertension (9.6%)       | Inpatient    | NR       | NR                                     | NR                       | naproxen (500 mg twice daily for 5 days)<br>placebo                                                                           | NR                    |
| Axfors_ChiCTR 2000031204, 2020<br>HYDRA <sup>34</sup> | Meta-analysis<br>ChiCTR2000031204                 | 35  | China   | 18-70    | NR     | NR                                                                               | Inpatient    | NR       | NR                                     | NR                       | chloroquine (250 mg/day for up to 14 days)<br>placebo                                                                         | Mortality             |
| Axfors_NCT04323527, 2020<br>CloroCOVID <sup>34</sup>  | Meta-analysis<br>NCT04323527                      | 82  | Brazil  | ≥18      | NR     | NR                                                                               | Inpatient    | NR       | NR                                     | NR                       | chloroquine (450 mg/day for 5 days)<br>placebo                                                                                | Mortality             |

| Study                                          | Publication status<br>Registration | n   | Country                                     | Mean age | % Male | Comorbidities | Type of care | Severity | % Mechanical ventilation (at baseline) | Detailed ventilation (%) | Treatments (dose and duration)                                                                                                                                                                                                                                                                                                                                      | Outcomes  |
|------------------------------------------------|------------------------------------|-----|---------------------------------------------|----------|--------|---------------|--------------|----------|----------------------------------------|--------------------------|---------------------------------------------------------------------------------------------------------------------------------------------------------------------------------------------------------------------------------------------------------------------------------------------------------------------------------------------------------------------|-----------|
| Axfors_NCT04333654, 2020 HYDRA <sup>34</sup>   | Meta-analysis NCT04333654          | 8   | United States, Belgium, France, Netherlands | 18-70    | NR     | NR            | Outpatient   | NR       | NR                                     | NR                       | hydroxychloroquine (600 mg/day for 10 days)<br>placebo                                                                                                                                                                                                                                                                                                              | Mortality |
| Axfors_NCT04335552, 2020 CCAP-1 <sup>34</sup>  | Meta-analysis NCT04335552          | 11  | United States                               | ≥12      | NR     | NR            | Inpatient    | NR       | NR                                     | NR                       | hydroxychloroquine (600 mg/day for 5 days)<br>standard care<br>hydroxychloroquine (600 mg/day for 5 days)<br>azithromycin (250 mg/day for 5 days)<br>azithromycin (75 mg twice daily for 5 days)                                                                                                                                                                    | Mortality |
| Axfors_NCT04338698, 2020 PROTECT <sup>34</sup> | Meta-analysis NCT04338698          | 373 | Pakistan                                    | ≥18      | NR     | NR            | Inpatient    | NR       | NR                                     | NR                       | azithromycin (250 mg/day for 5 days)<br>hydroxychloroquine (200 mg three times daily for 5 days)<br>oseltamivir (75 mg twice daily for 5 days)<br>azithromycin (250 mg/day for 5 day)<br>oseltamivir (75 mg twice daily for 5 days)<br>hydroxychloroquine (200 mg three times daily for 5 days)<br>oseltamivir (75 mg twice daily for 5 days)<br>oseltamivir (75 mg | Mortality |

| Study                                                | Publication status<br>Registration | n   | Country       | Mean age | % Male | Comorbidities | Type of care | Severity | % Mechanical ventilation<br>(at baseline) | Detailed ventilation (%) | Treatments (dose and duration)                                                                                                                                      | Outcomes  |
|------------------------------------------------------|------------------------------------|-----|---------------|----------|--------|---------------|--------------|----------|-------------------------------------------|--------------------------|---------------------------------------------------------------------------------------------------------------------------------------------------------------------|-----------|
|                                                      |                                    |     |               |          |        |               |              |          |                                           |                          | twice daily for 5 days)<br>azithromycin (250 mg/day for 5 days)<br>hydroxychloroquine (200 mg three times daily for 5 days)<br>azithromycin (250 mg/day for 5 days) |           |
| Axfors_NCT04340544, 2020 COMIHY <sup>34</sup>        | Meta-analysis NCT04340544          | 16  | Germany       | ≥18      | NR     | NR            | Outpatient   | NR       | NR                                        | NR                       | hydroxychloroquine (600 mg/day for 7 days)<br>placebo                                                                                                               | Mortality |
| Axfors_NCT04342221, 2020 COV-HCQ <sup>34</sup>       | Meta-analysis NCT04342221          | 27  | Germany       | ≥18      | NR     | NR            | Inpatient    | NR       | NR                                        | NR                       | hydroxychloroquine (600 mg/day for 7 days)<br>placebo                                                                                                               | Mortality |
| Axfors_NCT04342650, 2020 CloroCOVID <sup>34</sup>    | Meta-analysis NCT04342650          | 152 | Brazil        | ≥18      | NR     | NR            | Outpatient   | NR       | NR                                        | NR                       | chloroquine (450 mg/day for 5 days)<br>placebo                                                                                                                      | Mortality |
| Axfors_NCT04345289, 2020 CCAP-1 <sup>34</sup>        | Meta-analysis NCT04345289          | 2   | Denmark       | ≥18      | NR     | NR            | Inpatient    | NR       | NR                                        | NR                       | hydroxychloroquine (600 mg/day for 7 days)<br>placebo                                                                                                               | Mortality |
| Axfors_NCT04345692, 2020 OAHU-COVID 19 <sup>34</sup> | Meta-analysis NCT04345692          | 16  | United States | 18-95    | NR     | NR            | Inpatient    | NR       | NR                                        | NR                       | hydroxychloroquine (400 mg/day for 5 days)<br>standard care                                                                                                         | Mortality |

| Study                                        | Publication status<br>Registration                | n   | Country     | Mean age | % Male | Comorbidities                                                                                                | Type of care | Severity | % Mechanical ventilation (at baseline) | Detailed ventilation (%)                      | Treatments (dose and duration)                                                                                                                                       | Outcomes                                                                                              |
|----------------------------------------------|---------------------------------------------------|-----|-------------|----------|--------|--------------------------------------------------------------------------------------------------------------|--------------|----------|----------------------------------------|-----------------------------------------------|----------------------------------------------------------------------------------------------------------------------------------------------------------------------|-------------------------------------------------------------------------------------------------------|
| Axfors_NL8490, 2020<br>ARCHAIC <sup>34</sup> | Meta-analysis<br>NL8490                           | 15  | Netherlands | ≥18      | NR     | NR                                                                                                           | Inpatient    | NR       | NR                                     | NR                                            | chloroquine (600 mg/day for 5 days)<br>standard care<br>hydroxychloroquine (600 mg/day for 5 days)<br>standard care                                                  | Mortality                                                                                             |
| Azizi, 2021 <sup>35</sup>                    | Peer-reviewed publication<br>IRCT20190804044429N4 | 102 | Iran        | 58.9     | 34.7   | Cardiovascular disease (12.5%)<br>Cerebrovascular disease (5.6%)<br>Diabetes (31.9%)<br>Hypertension (18.1%) | Inpatient    | NR       | NR                                     | NR                                            | pentoxifylline (400 mg three times a day for 10 days)<br>placebo                                                                                                     | Mortality<br>Mechanical ventilation<br>Duration of hospitalization<br>ICU length of stay              |
| Babalola, 2021 <sup>36</sup>                 | Peer-reviewed publication<br>ISRCTN40302986       | 63  | Nigeria     | 44.3     | 69.3   | Diabetes (3.2%)<br>Hypertension (14.5%)                                                                      | Inpatient    | NR       | NR                                     | Intranasal oxygen (8.1%)<br>Ventilator (0.0%) | ivermectin (6 mg) (6 mg every 84 hours twice weekly for 2 weeks)<br>ivermectin (12 mg) (12 mg every 84 hours for 2 weeks)<br>lopinavir-ritonavir (daily for 2 weeks) | Mortality<br>Adverse effects leading to discontinuation<br>Viral clearance<br>Time to viral clearance |
| Babalola_2, 2021 <sup>37</sup>               | Pre-print<br>PACTR202108891693522                 | 61  | Nigeria     | 40.4     | 63     | Cardiovascular disease (0.0%)                                                                                | NR           | NR       | NR                                     | Oxygen use (4.9%)                             | azithromycin (hydroxychloroquine 200 mg per day for 3                                                                                                                | Adverse effects leading to                                                                            |

| Study                          | Publication status<br>Registration       | n   | Country | Mean age | % Male | Comorbidities                                                                                                                                                                          | Type of care | Severity               | % Mechanical ventilation (at baseline) | Detailed ventilation (%)      | Treatments (dose and duration)                                                              | Outcomes                                                                                                                                     |
|--------------------------------|------------------------------------------|-----|---------|----------|--------|----------------------------------------------------------------------------------------------------------------------------------------------------------------------------------------|--------------|------------------------|----------------------------------------|-------------------------------|---------------------------------------------------------------------------------------------|----------------------------------------------------------------------------------------------------------------------------------------------|
|                                |                                          |     |         |          |        | Hypertension (3.3%)                                                                                                                                                                    |              |                        |                                        | Ventilator use (3.3%)         | days, azithromycin 500 mg per day for three days)<br>hydroxychloroquine ()<br>standard care | discontinuati<br>on<br>Viral<br>clearance                                                                                                    |
| Balykova_1, 2020 <sup>38</sup> | Peer-reviewed publication<br>NCT04542694 | 39  | Russia  | 47.3     | NR     | Chronic heart failure of functional classes iii-iv (0.0%)                                                                                                                              | Inpatient    | Mild/Moderate (100.0%) | NR                                     | NR                            | favipiravir (600 mg twice daily for 7 days)<br>standard care                                | Mortality<br>Time to symptom/clinical improvement<br>Mechanical ventilation<br>Viral clearance                                               |
| Balykova_2, 2020 <sup>39</sup> | Peer-reviewed publication                | 206 | Russia  | 49.7     | 48.5   | Chronic lung diseases, including asthma and pulmonary sarcoidosis (4.8%)<br>Cardiovascular diseases, including a history of ischemic stroke and heart attack (5.8%)<br>Diabetes (8.7%) | Inpatient    | Severe (100%)          | NR                                     | Mask or nasal cannula (18.0%) | favipiravir (600 mg twice daily for 14 days)<br>standard care                               | Mortality<br>Mechanical ventilation<br>Adverse effects leading to discontinuation<br>Viral clearance<br>Time to symptom/clinical improvement |

| Study                                             | Publication status<br>Registration       | n   | Country       | Mean age | % Male | Comorbidities                                                                                                   | Type of care                       | Severity      | % Mechanical ventilation<br>(at baseline) | Detailed ventilation (%) | Treatments (dose and duration)                                                                                                                                          | Outcomes                                                                                                            |
|---------------------------------------------------|------------------------------------------|-----|---------------|----------|--------|-----------------------------------------------------------------------------------------------------------------|------------------------------------|---------------|-------------------------------------------|--------------------------|-------------------------------------------------------------------------------------------------------------------------------------------------------------------------|---------------------------------------------------------------------------------------------------------------------|
|                                                   |                                          |     |               |          |        | Hypertension (27.7%)                                                                                            |                                    |               |                                           |                          |                                                                                                                                                                         |                                                                                                                     |
| Barratt-Due, 2021<br>NOR-Solidarity <sup>40</sup> | Peer-reviewed publication<br>NCT04321616 | 181 | Norway        | 59.8     | 65.8   | Chronic pulmonary disease (5.5%)<br>Chronic cardiac disease (15.5%)<br>Diabetes (17.1%)<br>Hypertension (30.4%) | Inpatient<br>Intensive care (5.5%) | NR            | NR                                        | NR                       | remdesivir (400 mg on day 1, then 200 mg daily up to 9 days)<br>hydroxychloroquine (800 mg twice daily on day 1, then 400 mg twice daily up to 9 days)<br>standard care | Adverse effects leading to discontinuation                                                                          |
| Barrett_P1, 2021<br>STARS <sup>41</sup>           | Peer-reviewed publication<br>NCT04357730 | 36  | United States | 60       | 69.4   | Copd (77.8%)<br>Cardiac diseases (88.9%)<br>Diabetes (33.3%)<br>Hypertension (27.8%)                            | Inpatient                          | Severe (100%) | NR                                        | Mv (100.0%)              | heparin (50 mg tPA IV-bolus, followed by 7 days of heparin 5000 unit bolus (or until extubation)) tPA bolus ()<br>standard care                                         | Mortality<br>Clinically important bleeding<br>ICU length of stay<br>Ventilator-free days<br>Duration of ventilation |
| Barrett_P2, 2021<br>STARS <sup>41</sup>           | Peer-reviewed publication<br>NCT04357730 | 14  | United States | 63.5     | 85.7   | Copd (21.4%)<br>Cardiac diseases (7.1%)<br>Diabetes (35.7%)                                                     | Inpatient                          | Severe (100%) | NR                                        | Mv (100.0%)              | heparin (50 mg of tPA IV-bolus, followed by tPA drip 2 mg/hr plus heparin 500U/hour over 24 hours, then heparin to maintain                                             | Mortality<br>Clinically important bleeding<br>ICU length of stay                                                    |

| Study                                   | Publication status<br>Registration       | n   | Country          | Mean age | % Male | Comorbidities                                                                                                                                      | Type of care      | Severity               | % Mechanical ventilation<br>(at baseline) | Detailed ventilation (%)                                                         | Treatments (dose and duration)                                                                                                              | Outcomes                                                           |
|-----------------------------------------|------------------------------------------|-----|------------------|----------|--------|----------------------------------------------------------------------------------------------------------------------------------------------------|-------------------|------------------------|-------------------------------------------|----------------------------------------------------------------------------------|---------------------------------------------------------------------------------------------------------------------------------------------|--------------------------------------------------------------------|
|                                         |                                          |     |                  |          |        | Hypertension (57.1%)                                                                                                                               |                   |                        |                                           |                                                                                  | aPTT 60-80s for 7 days)<br>tPA drip ()<br>standard care                                                                                     | Ventilator-free days<br>Duration of ventilation                    |
| Bauer, 2021<br>ACEI-COVID <sup>42</sup> | Peer-reviewed publication<br>NCT04353596 | 216 | Austria, Germany | 72       | 63.2   | Copd (15.7%)<br>Coronary artery disease (21.6%)<br>Heart failure (8.8%)<br>Atrial fibrillation (17.2%)<br>Diabetes (32.8%)<br>Hypertension (97.5%) | Inpatient (92.6%) | NR                     | 2.5                                       | Need of oxygen substitution (42.2%)<br>Oxygen mask therapy (39.2%)<br>Niv (2.5%) | ACEi/ARB (continuation of ACEi/ARB at the dose previously prescribed during routine care)<br>standard care                                  | Mortality<br>Mechanical ventilation<br>Duration of hospitalization |
| Baxter, 2021 <sup>43</sup>              | Pre-print<br>NCT04559035                 | 79  | United States    | 64       | 54.4   | Asthma (5.7%)<br>Diabetes (11.3%)<br>Hypertension (43.4%)                                                                                          | Outpatient        | Mild/Moderate (100.0%) | NR                                        | Supplemental oxygen (0.0%)                                                       | povidone-iodine nasal irrigation (0.5 tsp twice daily for 14 days)<br>sodium bicarbonate nasal irrigation (0.5 tsp twice daily for 14 days) | Admission to hospital                                              |

| Study                                | Publication status<br>Registration       | n    | Country                                                                                         | Mean age | % Male | Comorbidities                                                                                                                                                                                                          | Type of care | Severity               | % Mechanical ventilation (at baseline) | Detailed ventilation (%)                                                      | Treatments (dose and duration)                                                                                                      | Outcomes                                                                                                                                                                            |
|--------------------------------------|------------------------------------------|------|-------------------------------------------------------------------------------------------------|----------|--------|------------------------------------------------------------------------------------------------------------------------------------------------------------------------------------------------------------------------|--------------|------------------------|----------------------------------------|-------------------------------------------------------------------------------|-------------------------------------------------------------------------------------------------------------------------------------|-------------------------------------------------------------------------------------------------------------------------------------------------------------------------------------|
| Beigel, 2020<br>ACTT-1 <sup>44</sup> | Peer-reviewed publication<br>NCT04280705 | 1062 | United States, Denmark, United Kingdom, Greece, Germany, Korea, Mexico, Spain, Japan, Singapore | 58.9     | 64.4   | Chronic respiratory disease (7.6%)<br>Chronic oxygen requirement (2.2%)<br>Asthma (11.4%)<br>Coronary artery disease (11.9%)<br>Congestive heart failure (5.6%)<br>T2DM (30.6%)<br>T1DM (0.9%)<br>Hypertension (50.7%) | Inpatient    | NR                     | 45                                     | Supplemental oxygen (41.0%)<br>High-flow or niv (18.2%)<br>lv or ecmo (26.8%) | remdesivir (100 mg/day for 10 days)<br>placebo                                                                                      | Mortality<br>Mechanical ventilation<br>Adverse effects leading to discontinuation<br>Duration of hospitalization<br>Duration of ventilation<br>Time to symptom/clinical improvement |
| Bhatt, 2021 <sup>45</sup>            | Pre-print<br>CTRI/2020/06/025664         | 44   | India                                                                                           | 44.3     | 70.5   | Moderate or severe copd, interstitial lung disease, asthma (0.0%)<br>Vascular disorders (9.1%)<br>Diabetes (0.0%)<br>Hypertension (9.1%)                                                                               | Inpatient    | Mild/Moderate (100.0%) | NR                                     | NR                                                                            | 2-deoxy-D-glucose (split dose (45 mg/kg in the morning, 18 mg/kg in the evening) per day for 28 days or discharge)<br>standard care | Mortality<br>Mechanical ventilation<br>Viral clearance<br>Duration of hospitalization<br>Time to symptom/clinical improvement<br>Time to to                                         |

| Study                       | Publication status<br>Registration               | n   | Country | Mean age | % Male | Comorbidities                                                                                                                            | Type of care | Severity               | % Mechanical ventilation (at baseline) | Detailed ventilation (%) | Treatments (dose and duration)                                                                                                                                                                                                                                             | Outcomes                                                                                                                                                    |
|-----------------------------|--------------------------------------------------|-----|---------|----------|--------|------------------------------------------------------------------------------------------------------------------------------------------|--------------|------------------------|----------------------------------------|--------------------------|----------------------------------------------------------------------------------------------------------------------------------------------------------------------------------------------------------------------------------------------------------------------------|-------------------------------------------------------------------------------------------------------------------------------------------------------------|
|                             |                                                  |     |         |          |        |                                                                                                                                          |              |                        |                                        |                          |                                                                                                                                                                                                                                                                            | viral clearance                                                                                                                                             |
| Bhatt, 2021 <sup>45</sup>   | Pre-print<br>CTRI/2020/06/025664                 | 66  | India   | 45.2     | 87.7   | Moderate or severe copd, interstitial lung disease, asthma (0.0%)<br>Vascular disorders (0.0%)<br>Diabetes (0.0%)<br>Hypertension (0.0%) | Inpatient    | Mild/Moderate (100.0%) | NR                                     | NR                       | 2-deoxy-D-glucose (90 mg) (split dose (45 mg/kg in the morning, 45 mg/kg in the evening) per day for 10 days or discharge)<br>2-deoxy-D-glucose (126 mg) (split dose (63 mg/kg in the morning, 63 mg/kg in the evening) per day for 10 days or discharge)<br>standard care | Mortality<br>Mechanical ventilation<br>Viral clearance<br>Duration of hospitalization<br>Time to symptom/clinical improvement<br>Time to to viral clearance |
| Bhushan, 2021 <sup>46</sup> | Peer-reviewed publication<br>CTRI/2020/12/029855 | 250 | India   | 49.9     | 70.8   | NR                                                                                                                                       | Inpatient    | Mild/Moderate (100.0%) | NR                                     | NR                       | pegylated interferon alfa-2b (1 µg/kg subcutaneous injection, single dose)<br>standard care                                                                                                                                                                                | Mortality<br>Mechanical ventilation<br>Viral clearance<br>Duration of hospitalization<br>Time to                                                            |

| Study                                      | Publication status<br>Registration       | n   | Country | Mean age | % Male | Comorbidities                                                                                                   | Type of care                         | Severity                                   | % Mechanical ventilation<br>(at baseline) | Detailed ventilation (%)                                                                                               | Treatments (dose and duration)                                     | Outcomes                                                                                                           |
|--------------------------------------------|------------------------------------------|-----|---------|----------|--------|-----------------------------------------------------------------------------------------------------------------|--------------------------------------|--------------------------------------------|-------------------------------------------|------------------------------------------------------------------------------------------------------------------------|--------------------------------------------------------------------|--------------------------------------------------------------------------------------------------------------------|
|                                            |                                          |     |         |          |        |                                                                                                                 |                                      |                                            |                                           |                                                                                                                        |                                                                    | symptom/clinical improvement                                                                                       |
| Bikdeli, 2021<br>INSPIRATION <sup>47</sup> | Peer-reviewed publication<br>NCT04486508 | 598 | Iran    | 61.5     | 57.8   | Obstructive airway disease (6.9%)<br>Cardiovascular disease (13.9%)<br>Diabetes (27.6%)<br>Hypertension (44.3%) | Inpatient<br>Intensive care (100.0%) | Severe (100%)<br>Severe: Critical (100.0%) | 22.8                                      | Nasal cannula (4.3%)<br>Face mask (10.7%)<br>Reservoir mask (30.6%)<br>High-flow (2.7%)<br>Nippv (31.7%)<br>Iv (20.1%) | enoxaparin (enoxaparin 1 mg/kg daily for 30 days)<br>standard care | Mortality<br>Venous thromboembolism<br>Clinically important bleeding<br>ICU length of stay<br>Ventilator-free days |
| Blum, 2021 <sup>48</sup>                   | Peer-reviewed publication<br>NCT04348409 | 50  | Brazil  | 64       | 30     | NR                                                                                                              | Inpatient                            | NR                                         | NR                                        | NR                                                                                                                     | nitazoxanide (600 mg twice daily for 7 days)<br>placebo            | Mortality<br>Mechanical ventilation<br>Adverse effects leading to discontinuation<br>Duration of hospitalization   |

| Study                                | Publication status<br>Registration       | n   | Country       | Mean age | % Male | Comorbidities                                                                                                                                                                                                           | Type of care                        | Severity      | % Mechanical ventilation (at baseline) | Detailed ventilation (%)                                                                                   | Treatments (dose and duration)                                                                                                                                                | Outcomes                                                                                                                                             |
|--------------------------------------|------------------------------------------|-----|---------------|----------|--------|-------------------------------------------------------------------------------------------------------------------------------------------------------------------------------------------------------------------------|-------------------------------------|---------------|----------------------------------------|------------------------------------------------------------------------------------------------------------|-------------------------------------------------------------------------------------------------------------------------------------------------------------------------------|------------------------------------------------------------------------------------------------------------------------------------------------------|
| Bosaeed, 2021<br>FACCT <sup>49</sup> | Peer-reviewed publication<br>NCT04392973 | 268 | Saudi Arabia  | 52.6     | 40.5   | Asthma (11.8%)<br>Heart disease (1.6%)<br>History of myocardial infarction (0.0%)<br>An irregular rhythm/ qtc (0.0%)<br>Diabetes (42.1%)<br>Hypertension (40.9%)                                                        | Inpatient<br>Intensive care (16.9%) | Severe (100%) | 17.7                                   | Supplemental oxygen (74.8%)<br>High-flow, niv (15.3%)<br>lv, ecmo (2.4%)                                   | favipiravir (1800 mg by mouth twice on day 1 and 800 mg twice daily for 9 days)<br>hydrochloroquine (400 mg twice on day 1 and 200 mg tice daily for 4 days)<br>standard care | Mortality<br>Mechanical ventilation<br>Duration of hospitalizati on<br>Time to symptom/cli nical improvemen t                                        |
| Brown, 2020<br>HAHPS <sup>50</sup>   | Peer-reviewed publication<br>NCT04329832 | 85  | United States | 55       | 61.2   | Copd (23.5%)<br>Myocardial infarction (10.6%)<br>Congestive heart failure (8.2%)<br>Peripheral vascular disease (3.5%)<br>Cerebrovascul ar disease (8.2%)<br>Diabetes without end-organ damage (25.9%)<br>Diabetes with | Inpatient<br>Intensive care (43.5%) | NR            | 30.6                                   | Supplemental oxygen (55.3%)<br>High-flow or niv (15.3%)<br>lv (10.6%)<br>lv and other organ support (4.7%) | hydroxychloroquine (200 mg twice daily for 5 days)<br>azithromycin (250 mg daily for 5 days)                                                                                  | Mortality<br>Mechanical ventilation<br>Adverse effects leading to discontinuati on<br>Ventilator-free days<br>Time to symptom/cli nical improvemen t |

| Study                                   | Publication status<br>Registration           | n    | Country        | Mean age | % Male | Comorbidities                                                                                      | Type of care | Severity | % Mechanical ventilation<br>(at baseline) | Detailed ventilation (%)       | Treatments (dose and duration)                                                                                                      | Outcomes                                                                                                    |
|-----------------------------------------|----------------------------------------------|------|----------------|----------|--------|----------------------------------------------------------------------------------------------------|--------------|----------|-------------------------------------------|--------------------------------|-------------------------------------------------------------------------------------------------------------------------------------|-------------------------------------------------------------------------------------------------------------|
|                                         |                                              |      |                |          |        | end-organ damage (8.2%)                                                                            |              |          |                                           |                                |                                                                                                                                     |                                                                                                             |
| Bukhari, 2021 <sup>51</sup>             | Pre-print<br>NCT04392713                     | 100  | Pakistan       | 40.5     | 84.9   | Ischemic heart disease (5.8%)<br>Diabetes (11.6%)<br>Hypertension (13.9%)                          | Inpatient    | NR       | NR                                        | NR                             | ivermectin (12 mg single dose)<br>standard care                                                                                     | Viral clearance                                                                                             |
| Buonfrate, 2021<br>COVER <sup>52</sup>  | Pre-print<br>NCT04438850                     | 93   | Italy          | 47.2     | 58.1   | Respiratory condition (6.5%)<br>Cardiovascular disease (23.7%)<br>Diabetes (3.2%)                  | Outpatient   | NR       | 0                                         | Unspecified ventilation (0.0%) | ivermectin (600 µg/kg) (600 µg/kg single dose for 5 days)<br>ivermectin (1200 µg/kg) (1200 µg/kg single dose for 5 days)<br>placebo | Admission to hospital<br>Adverse effects leading to discontinuation<br>Time to symptom/clinical improvement |
| Butler, 2021<br>PRINCIPLE <sup>53</sup> | Peer-reviewed publication<br>ISRCTN 86534580 | 1840 | United Kingdom | 61.1     | 44.1   | Asthma, copd, or lung disease (37.3%)<br>Angina, heart attack, heart failure, atrial fibrillation, | Outpatient   | NR       | NR                                        | NR                             | doxycycline (100 mg once daily for 6 days)<br>standard care                                                                         | Mortality<br>Mechanical ventilation<br>Duration of hospitalization<br>Time to                               |

| Study                                                               | Publication status<br>Registration | n   | Country | Mean age | % Male | Comorbidities                                                      | Type of care                         | Severity      | % Mechanical ventilation<br>(at baseline) | Detailed ventilation (%) | Treatments (dose and duration)                                      | Outcomes                                                                                                                         |
|---------------------------------------------------------------------|------------------------------------|-----|---------|----------|--------|--------------------------------------------------------------------|--------------------------------------|---------------|-------------------------------------------|--------------------------|---------------------------------------------------------------------|----------------------------------------------------------------------------------------------------------------------------------|
|                                                                     |                                    |     |         |          |        | valve problems (14.2%)<br>Diabetes (18.0%)<br>Hypertension (41.5%) |                                      |               |                                           |                          |                                                                     | symptom/clinical improvement                                                                                                     |
| Byakika-Kibwika, 2021<br>HONEST trial <sup>54</sup>                 | Pre-print<br>NCT04860284           | 105 | Uganda  | 32       | 73.3   | Heart disease (0.9%)<br>Diabetes (2.9%)<br>Hypertension (2.9%)     | NR                                   | NR            | NR                                        | NR                       | hydroxychloroquine (200 mg twice daily for 5 days)<br>standard care | Adverse effects leading to discontinuation<br>Viral clearance<br>Time to symptom/clinical improvement<br>Time to viral clearance |
| CORIMUNO-SARI-1_NCT04324073, 2021<br>CORIMUNO-SARI-1 <sup>155</sup> | Meta-analysis<br>NCT04324073       | 144 | France  | 62.3     | 75     | NR                                                                 | Inpatient                            | Severe (100%) | NR                                        | NR                       | sarilumab (400 mg for one to two doses)<br>standard care            | Mortality<br>Duration of mechanical ventilation                                                                                  |
| CORIMUNO-SARI-ICU_NCT0432                                           | Meta-analysis<br>NCT04324073       | 81  | France  | 61.6     | 76.5   | NR                                                                 | Inpatient<br>Intensive care (100.0%) | Severe (100%) | NR                                        | NR                       | sarilumab (400 mg one to two doses)<br>standard care                | Mortality                                                                                                                        |

| Study                                                                 | Publication status<br>Registration | n   | Country       | Mean age | % Male | Comorbidities | Type of care                         | Severity             | % Mechanical ventilation<br>(at baseline) | Detailed ventilation (%)         | Treatments (dose and duration)                                                                         | Outcomes                                            |
|-----------------------------------------------------------------------|------------------------------------|-----|---------------|----------|--------|---------------|--------------------------------------|----------------------|-------------------------------------------|----------------------------------|--------------------------------------------------------------------------------------------------------|-----------------------------------------------------|
| 4073, 2021<br>CORIMUNO-SARI-ICU <sup>1</sup>                          |                                    |     |               |          |        |               |                                      |                      |                                           |                                  |                                                                                                        | Duration of mechanical ventilation                  |
| CORIMUNO-TOCI-ICU_NCT04331808, 2021 <sup>1</sup><br>CORIMUNO-TOCI-ICU | Meta-analysis<br>NCT04331808       | 92  | France        | 64.2     | 71.7   | NR            | Inpatient<br>Intensive care (100.0%) | Mild/Moderate (9.0%) | 100                                       | Unspecified ventilation (100.0%) | tocilizumab (8 mg/kg (up to 800 mg) one to two doses)<br>standard care                                 | Mortality<br><br>Duration of mechanical ventilation |
| COV-AID_NCT04330638, 2021<br>COV-AID <sup>1</sup>                     | Meta-analysis<br>NCT04330638       | 230 | Belgium       | 63.6     | 77.4   | NR            | Inpatient                            | Severe (100%)        | NR                                        | NR                               | tocilizumab (8 mg/kg (up to 800 mg) single dose)<br>siltuximab (11 mg/kg single dose)<br>standard care | Mortality<br><br>Duration of mechanical ventilation |
| COVIDOSE2-SSA_NCT04479358, 2021<br>COVIDOSE2-SSA <sup>1</sup>         | Meta-analysis<br>NCT04479358       | 28  | United States | 65       | 67.9   | NR            | Inpatient                            | Severe (100%)        | 0                                         | Mechanical ventilation (0.0%)    | tocilizumab (40 mg single dose)<br>tocilizumab (120 mg single dose)<br>standard care                   | Mortality                                           |
| COVIDSTORM_NCT04577534, 2021<br>COVIDSTORM <sup>1</sup>               | Meta-analysis<br>NCT04577534       | 39  | Finland       | 65.7     | 53.9   | NR            | Inpatient                            | Severe (100%)        | NR                                        | NR                               | tocilizumab (8 mg/kg (up to 800 mg) single dose)<br>standard care                                      | Mortality                                           |
| COVIT0Z_NCT04435717, 2021<br>COVIT0Z-01 <sup>1</sup>                  | Meta-analysis<br>NCT04435717       | 26  | Spain         | 57.5     | 65.4   | NR            | Inpatient                            | Severe (100%)        | NR                                        | NR                               | tocilizumab (8 mg/kg (up to 800 mg) single dose)<br>tocilizumab (8 mg/kg up to 800 mg two              | Mortality                                           |

| Study                                                | Publication status<br>Registration       | n   | Country | Mean age | % Male | Comorbidities                                                                                                                                                                          | Type of care | Severity               | % Mechanical ventilation<br>(at baseline) | Detailed ventilation (%)               | Treatments (dose and duration)                    | Outcomes                                                                                                                                                              |
|------------------------------------------------------|------------------------------------------|-----|---------|----------|--------|----------------------------------------------------------------------------------------------------------------------------------------------------------------------------------------|--------------|------------------------|-------------------------------------------|----------------------------------------|---------------------------------------------------|-----------------------------------------------------------------------------------------------------------------------------------------------------------------------|
|                                                      |                                          |     |         |          |        |                                                                                                                                                                                        |              |                        |                                           |                                        | doses)<br>standard care                           |                                                                                                                                                                       |
| Cadegiani_1, 2021<br>EAT-DUTA AndroCoV <sup>56</sup> | Peer-reviewed publication<br>NCT04446429 | 130 | Brazil  | 42       | 100    | Asthma (0.8%)<br>Copd (0.0%)<br>Myocardial infarction (0.8%)<br>Heart failure (0.8%)<br>Stroke (0.0%)<br>Other cardiac dysfunctions (2.3%)<br>Diabetes (10.8%)<br>Hypertension (25.4%) | Outpatient   | Mild/Moderate (100.0%) | 0                                         | Supplemental oxygen, niv, or iv (0.0%) | dutasteride (0.5 mg once daily)<br>placebo        | Mortality<br>Mechanical ventilation<br>Admission to hospital<br>Adverse effects leading to discontinuation<br>Viral clearance<br>Time to symptom/clinical improvement |
| Cadegiani_2, 2020 <sup>57</sup>                      | Pre-print<br>NCT04446429                 | 214 | Brazil  | NR       | 100    | NR                                                                                                                                                                                     | Outpatient   | Mild/Moderate (100.0%) | NR                                        | NR                                     | proxalutamide (200 mg/day for 15 days)<br>placebo | Mortality<br>Mechanical ventilation<br>Admission to hospital                                                                                                          |

| Study                           | Publication status<br>Registration | n   | Country | Mean age | % Male | Comorbidities                                                                                                                                           | Type of care | Severity      | % Mechanical ventilation<br>(at baseline) | Detailed ventilation (%)                                | Treatments (dose and duration)                      | Outcomes                                                                                                   |
|---------------------------------|------------------------------------|-----|---------|----------|--------|---------------------------------------------------------------------------------------------------------------------------------------------------------|--------------|---------------|-------------------------------------------|---------------------------------------------------------|-----------------------------------------------------|------------------------------------------------------------------------------------------------------------|
| Cadegiani_3, 2021 <sup>58</sup> | Peer-reviewed publication          | 236 | Brazil  | 44.9     | 54.2   | Asthma (5.1%)<br>Copd (0.0%)<br>Myocardial infarction (0.8%)<br>Stroke (0.8%)<br>Congestive heart failure (0.8%)<br>T1DM (8.9%)<br>Hypertension (22.5%) | Outpatient   | NR            | NR                                        | NR                                                      | proxalutamide (200 mg/day for 15 days)<br>placebo   | Adverse effects leading to discontinuation<br>Viral clearance<br>Time to symptom/clinical improvement      |
| Cadegiani_4, 2021 <sup>59</sup> | Pre-print<br>NCT04853134           | 177 | Brazil  | 44.2     | 0      | Copd (0.6%)<br>Severe cardiovascular disease (0.0%)<br>Diabetes (8.5%)<br>Hypertension (31.1%)                                                          | Outpatient   | NR            | 0                                         | Unspecified ventilation (0.0%)                          | proxalutamide (200 mg daily for 7 days)<br>placebo  | Mortality<br>Mechanical ventilation<br>Admission to hospital<br>Adverse effects leading to discontinuation |
| Cadegiani_5, 2021 <sup>60</sup> | Pre-print<br>NCT04728802           | 645 | Brazil  | 49.5     | 56.7   | Copd (2.5%)<br>Congestive heart failure class iii or iv (0.0%)<br>Diabetes (12.2%)<br>Hypertension (27.1%)                                              | Inpatient    | Severe (100%) | 66.5                                      | Iv (0.0%)<br>Niv (66.5%)<br>Supplemental oxygen (30.4%) | proxalutamide (300 mg daily for 14 days)<br>placebo | Mortality<br>Mechanical ventilation<br>Duration of hospitalization                                         |

| Study                                    | Publication status<br>Registration                 | n   | Country | Mean age | % Male | Comorbidities                                                                    | Type of care | Severity      | % Mechanical ventilation<br>(at baseline) | Detailed ventilation (%)                                                     | Treatments (dose and duration)                                               | Outcomes                                                                                                                                                                       |
|------------------------------------------|----------------------------------------------------|-----|---------|----------|--------|----------------------------------------------------------------------------------|--------------|---------------|-------------------------------------------|------------------------------------------------------------------------------|------------------------------------------------------------------------------|--------------------------------------------------------------------------------------------------------------------------------------------------------------------------------|
| Cao_1, 2020<br>LOTUS China <sup>61</sup> | Peer-reviewed publication<br>ChiCTR2000029308.     | 199 | China   | 58       | 60.3   | Cerebrovascular disease (6.5%)<br>Diabetes (11.6%)                               | Inpatient    | Severe (100%) | 16.1                                      | Supplemental oxygen (69.8%)<br>High-flow or niv (15.6%)<br>lv or ecmo (0.5%) | lopinavir-ritonavir (400 mg/100 mg twice daily for 14 days)<br>standard care | Mortality<br>Mechanical ventilation<br>Viral clearance<br>Duration of hospitalization<br>ICU length of stay<br>Duration of ventilation<br>Time to symptom/clinical improvement |
| Cao_2, 2020 <sup>62</sup>                | Peer-reviewed publication<br>ChiCTR-OPN-2000029580 | 43  | China   | 63       | 58.5   | Coronary artery heart disease (7.3%)<br>Diabetes (19.5%)<br>Hypertension (39.0%) | Inpatient    | Severe (100%) | 12.2                                      | Supplemental oxygen (87.8%)<br>High flow or niv (12.2%)                      | ruxolitinib (5 mg twice daily)<br>placebo                                    | Mortality<br>Mechanical ventilation<br>Duration of hospitalization<br>Duration of ventilation<br>Time to symptom/clinical improvement<br>Time to viral clearance               |

| Study                                            | Publication status<br>Registration                             | n   | Country                                                                       | Mean age | % Male | Comorbidities                                                                                                                                                                  | Type of care     | Severity               | % Mechanical ventilation<br>(at baseline) | Detailed ventilation (%)       | Treatments (dose and duration)                                                                                                                                                                  | Outcomes                                                                                                                                                                            |
|--------------------------------------------------|----------------------------------------------------------------|-----|-------------------------------------------------------------------------------|----------|--------|--------------------------------------------------------------------------------------------------------------------------------------------------------------------------------|------------------|------------------------|-------------------------------------------|--------------------------------|-------------------------------------------------------------------------------------------------------------------------------------------------------------------------------------------------|-------------------------------------------------------------------------------------------------------------------------------------------------------------------------------------|
| Caricchio, 2021<br>CAN-COVID trial <sup>63</sup> | Peer-reviewed publication<br>NCT04362813                       | 454 | France, Germany, Hungary, Italy, Russia, Spain, United Kingdom, United States | 58       | 58.8   | Chronic obstructive pulmonary disease (7.3%)<br>Asthma (7.7%)<br>Chronic cardiac disease (20.3%)<br>Cerebrovascular disease (6.0%)<br>Diabetes (36.1%)<br>Hypertension (55.7%) | Inpatient        | Severe (100%)          | 0                                         | Iv (0.0%)                      | canakinumab (single dose of canakinumab (450mg for body weight of 40-<60 kg, 600mg for 60-80 kg, and 750 mg for >80 kg) in 250 mL of 5% dextrose infused intravenously over 2 hours)<br>placebo | Mortality<br>Mechanical ventilation<br>Adverse effects leading to discontinuation<br>Duration of hospitalization<br>Duration of ventilation<br>Time to symptom/clinical improvement |
| Carrouel, 2021 <sup>64</sup>                     | Peer-reviewed publication<br>NCT04352959                       | 176 | France                                                                        | 43.1     | 45.5   | NR                                                                                                                                                                             | Inpatient (6.5%) | Mild/Moderate (100.0%) | 0                                         | Unspecified ventilation (0.0%) | β-cyclodextrin (3 daily mouthwashes (morning, noon and evening) for 30 seconds during 7 days)<br>citrox mouthwash ( )<br>placebo                                                                | NR                                                                                                                                                                                  |
| Castillo, 2020<br>Pilot Covidiol <sup>65</sup>   | Peer-reviewed publication<br>NCT04366908 (full trial of pilot) | 76  | Spain                                                                         | 53       | 59.2   | Previous lung disease (7.9%)<br>Cardiovascular disease (4.0%)<br>Diabetes (10.5%)                                                                                              | Inpatient        | NR                     | NR                                        | NR                             | vitamin D (0.532 mg on day 1, then 0.266 mg on day 3 and 7, and then weekly until discharge or ICU)                                                                                             | Mortality<br>Adverse effects leading to discontinuation                                                                                                                             |

| Study                                   | Publication status<br>Registration       | n   | Country   | Mean age | % Male | Comorbidities                                                                                            | Type of care                        | Severity               | % Mechanical ventilation (at baseline) | Detailed ventilation (%)                                    | Treatments (dose and duration)                                                                                                                                    | Outcomes                                                           |
|-----------------------------------------|------------------------------------------|-----|-----------|----------|--------|----------------------------------------------------------------------------------------------------------|-------------------------------------|------------------------|----------------------------------------|-------------------------------------------------------------|-------------------------------------------------------------------------------------------------------------------------------------------------------------------|--------------------------------------------------------------------|
|                                         |                                          |     |           |          |        | Hypertension (34.2%)                                                                                     |                                     |                        |                                        |                                                             | admission)<br>standard care                                                                                                                                       |                                                                    |
| Cavalcanti, 2020 <sup>66</sup>          | Peer-reviewed publication<br>NCT04322123 | 667 | Brazil    | 50.3     | 58.4   | Copd (1.8%)<br>Asthma (6.0%)<br>Heart failure (1.5%)<br>Diabetes (19.1%)<br>Hypertension (38.8%)         | Inpatient<br>Intensive care (13.8%) | NR                     | 0                                      | Supplemental oxygen (41.8%)<br>High-flow, niv, or iv (0.0%) | azithromycin (500 mg/day for 7 days)<br>hydroxychloroquine (400 mg twice daily for 7 days)<br>hydroxychloroquine (400 mg twice daily for 7 days)<br>standard care | Mortality<br>Mechanical ventilation<br>Duration of hospitalization |
| Chaccour, 2020<br>SAINT <sup>67</sup>   | Peer-reviewed publication<br>NCT04390022 | 24  | Spain     | 26       | 50     | Copd (0.0%)<br>Coronary disease (0.0%)<br>Diabetes (0.0%)<br>Hypertension (0.0%)                         | Outpatient                          | Mild/Moderate (100.0%) | NR                                     | NR                                                          | ivermectin (400 µg/kg single dose)<br>placebo                                                                                                                     | Viral clearance<br>Time to viral clearance                         |
| Chachar, 2020 <sup>68</sup>             | Peer-reviewed publication                | 50  | Pakistan  | 41.8     | 62     | Chronic lung disease (0.0%)<br>Cardiovascular disease (8.0%)<br>Diabetes (40.0%)<br>Hypertension (26.0%) | Outpatient                          | Mild/Moderate (100.0%) | NR                                     | NR                                                          | ivermectin (12 mg once, then 12 mg after 12 hours, and 12 mg after 24 hours)<br>standard care                                                                     | NR                                                                 |
| Chahla, 2021<br>IVER-Leve <sup>69</sup> | Pre-print<br>NCT04784481                 | 254 | Argentina | 37.7     | 47.6   | Asthma (1.2%)<br>Diabetes (6.3%)                                                                         | Outpatient                          | Mild/Moderate (100.0%) | NR                                     | NR                                                          | ivermectin (6 mg taken four times every 7 days)                                                                                                                   | Mortality<br>Adverse effects                                       |

| Study                         | Publication status<br>Registration       | n  | Country       | Mean age | % Male | Comorbidities        | Type of care | Severity               | % Mechanical ventilation (at baseline) | Detailed ventilation (%) | Treatments (dose and duration)                                                                                                                                                                                                                                                                                               | Outcomes                                                           |
|-------------------------------|------------------------------------------|----|---------------|----------|--------|----------------------|--------------|------------------------|----------------------------------------|--------------------------|------------------------------------------------------------------------------------------------------------------------------------------------------------------------------------------------------------------------------------------------------------------------------------------------------------------------------|--------------------------------------------------------------------|
|                               |                                          |    |               |          |        | Hypertension (12.6%) |              |                        |                                        |                          | for 4 weeks) standard care                                                                                                                                                                                                                                                                                                   | leading to discontinuation<br>Time to symptom/clinical improvement |
| Chaudhary, 2021 <sup>70</sup> | Peer-reviewed publication<br>NCT04603794 | 0  | United States | 50.6     | 59.5   | NR                   | Inpatient    | NR                     | NR                                     | NR                       | saline mouthwash (30 second oral rinse with 0.9% normal saline)<br>hydrogen peroxide mouthwash (30 second oral rinse with 1% hydrogen peroxide)<br>chlorhexidine gluconate mouthwash (30 second oral rinse with 0.12% chlorhexidine gluconate)<br>povidone-iodine mouthwash (30 second oral rinse with 0.5% povidone iodine) | Adverse effects leading to discontinuation                         |
| Chen_1, 2020 <sup>71</sup>    | Pre-print<br>ChiCTR2000029559            | 62 | China         | 44.7     | 46.8   | NR                   | Inpatient    | Mild/Moderate (100.0%) | NR                                     | NR                       | hydroxychloroquine (200 mg twice daily for 5 days)<br>standard care                                                                                                                                                                                                                                                          | Time to symptom/clinical improvement                               |

| Study                      | Publication status<br>Registration       | n   | Country | Mean age | % Male | Comorbidities                                                                                                       | Type of care | Severity                                                           | % Mechanical ventilation (at baseline) | Detailed ventilation (%)    | Treatments (dose and duration)                                                                                      | Outcomes                                                                                                                                      |
|----------------------------|------------------------------------------|-----|---------|----------|--------|---------------------------------------------------------------------------------------------------------------------|--------------|--------------------------------------------------------------------|----------------------------------------|-----------------------------|---------------------------------------------------------------------------------------------------------------------|-----------------------------------------------------------------------------------------------------------------------------------------------|
| Chen_2, 2020 <sup>72</sup> | Pre-print<br>ChiCTR2000030254            | 240 | China   | NR       | 46.6   | Diabetes (11.4%)<br>Hypertension (28.0%)                                                                            | NR           | Mild/Moderate (88.5%)<br>Severe (11.4%)<br>Severe: Critical (1.3%) | NR                                     | NR                          | favipiravir (600 mg twice daily for 7 days)<br>umifenovir (200 mg three times daily for 7 to 14 days)               | Mortality<br>Time to symptom/clinical improvement                                                                                             |
| Chen_3, 2020 <sup>73</sup> | Peer-reviewed publication<br>NCT04261517 | 30  | China   | 48.6     | 70     | Severe lung disease (0.0%)<br>COPD (3.3%)<br>Severe heart disease (0.0%)<br>Diabetes (6.7%)<br>Hypertension (26.7%) | Inpatient    | Mild/Moderate (100.0%)                                             | NR                                     | NR                          | hydroxychloroquine (400 mg once daily for 5 days)<br>standard care                                                  | Mortality<br>Adverse effects leading to discontinuation<br>Viral clearance<br>Time to symptom/clinical improvement<br>Time to viral clearance |
| Chen_4, 2020 <sup>74</sup> | Pre-print<br>ChiCTR2000030054            | 48  | China   | 46.9     | 45.8   | Diabetes (18.8%)<br>Hypertension (16.7%)                                                                            | Inpatient    | Mild/Moderate (100.0%)                                             | NR                                     | Supplemental oxygen (72.9%) | chloroquine (500 mg once daily for 10 days)<br>hydroxychloroquine (200 mg twice daily for 10 days)<br>standard care | Mortality<br>Adverse effects leading to discontinuation<br>Viral clearance                                                                    |

| Study                      | Publication status<br>Registration            | n   | Country | Mean age | % Male | Comorbidities                                                                                           | Type of care | Severity               | % Mechanical ventilation (at baseline) | Detailed ventilation (%)                                              | Treatments (dose and duration)                                                                    | Outcomes                                                                                                          |
|----------------------------|-----------------------------------------------|-----|---------|----------|--------|---------------------------------------------------------------------------------------------------------|--------------|------------------------|----------------------------------------|-----------------------------------------------------------------------|---------------------------------------------------------------------------------------------------|-------------------------------------------------------------------------------------------------------------------|
|                            |                                               |     |         |          |        |                                                                                                         |              |                        |                                        |                                                                       |                                                                                                   | Duration of hospitalization<br>Time to symptom/clinical improvement<br>Time to viral clearance                    |
| Chen_5, 2020 <sup>75</sup> | Peer-reviewed publication<br>NCT04384380      | 33  | Taiwan  | 32.9     | 57.6   | Lung disease (0.0%)<br>Cardiac conduction abnormalities at 152 electrocardiographic (0.0%)              | Inpatient    | Mild/Moderate (100.0%) | NR                                     | Supplemental oxygen (0.0%)                                            | hydroxychloroquine (200 mg twice daily for 7 days)<br>standard care                               | Mortality<br>Time to viral clearance                                                                              |
| Cheng, 2020 <sup>76</sup>  | Peer-reviewed publication<br>ChiCTR2000030007 | 200 | China   | 45       | 56     | Respiratory condition (0.0%)<br>Cardiovascular disease (0.0%)<br>Diabetes (0.0%)<br>Hypertension (0.0%) | Inpatient    | NR                     | 27                                     | Supplemental oxygen (60.0%)<br>High-flow nasal cannula or niv (27.0%) | recombinant human granulocyte colony-stimulating factor (5 µg/kg/day for 3 days)<br>standard care | Mortality<br>Mechanical ventilation<br>Viral clearance<br>Duration of hospitalization<br>Time to symptom/clinical |

| Study                                            | Publication status<br>Registration       | n   | Country                                                   | Mean age | % Male | Comorbidities                                                                                                                        | Type of care | Severity              | % Mechanical ventilation (at baseline) | Detailed ventilation (%)       | Treatments (dose and duration)                                                                             | Outcomes                                                                                                                 |
|--------------------------------------------------|------------------------------------------|-----|-----------------------------------------------------------|----------|--------|--------------------------------------------------------------------------------------------------------------------------------------|--------------|-----------------------|----------------------------------------|--------------------------------|------------------------------------------------------------------------------------------------------------|--------------------------------------------------------------------------------------------------------------------------|
|                                                  |                                          |     |                                                           |          |        |                                                                                                                                      |              |                       |                                        |                                |                                                                                                            | improvement                                                                                                              |
| Clemency, 2021 <sup>77</sup>                     | Pre-print<br>NCT04377711                 | 400 | United States                                             | 43.3     | 44.8   | Asthma (6.5%)<br>Cystic fibrosis (0.0%)<br>Idiopathic pulmonary fibrosis (0.0%)<br>Diabetes (7.5%)<br>Hypertension (22.2%)           | Outpatient   | NR                    | 0                                      | Unspecified ventilation (0.0%) | ciclesonide (320 µg twice daily for 30 days)<br>placebo                                                    | Mortality<br>Admission to hospital<br>Adverse effects leading to discontinuation<br>Time to symptom/clinical improvement |
| Cohen, 2020<br>REPLACE COVID trial <sup>78</sup> | Peer-reviewed publication<br>NCT04338009 | 152 | USA, Canada, Mexico, Sweden, Peru, Bolivia, and Argentina | 62       | 55.3   | Chronic pulmonary disease; 11.18 (17.1%)<br>Pre-existing cardiac disease; 11.84 (15.8%)<br>Diabetes (52.0%)<br>Hypertension (100.0%) | Inpatient    | Mild/Moderate (87.5%) | NR                                     | Supplemental oxygen (80.9%)    | ACEi/ARB (continuation of ACEi/ARB at the dose previously prescribed during routine care)<br>standard care | Mortality<br>Mechanical ventilation<br>Adverse effects leading to discontinuation<br>Duration of hospitalization         |

| Study                                           | Publication status<br>Registration          | n   | Country       | Mean age | % Male | Comorbidities                                                                                                                             | Type of care | Severity      | % Mechanical ventilation (at baseline) | Detailed ventilation (%)                                              | Treatments (dose and duration)                                                                                                                                | Outcomes                                                                                      |
|-------------------------------------------------|---------------------------------------------|-----|---------------|----------|--------|-------------------------------------------------------------------------------------------------------------------------------------------|--------------|---------------|----------------------------------------|-----------------------------------------------------------------------|---------------------------------------------------------------------------------------------------------------------------------------------------------------|-----------------------------------------------------------------------------------------------|
| Connors, 2021<br>ACTIV-4B <sup>79</sup>         | Peer-reviewed publication<br>NCT04498273    | 657 | United States | 54       | 40.9   | Diabetes (18.3%)<br>Hypertension (35.3%)                                                                                                  | Outpatient   | NR            | NR                                     | NR                                                                    | aspirin (81 mg once daily for 45 days)<br>apixaban (2.5 TID) (2.5 mg twice daily for 45 days)<br>apixaban (5.0 TID) (5 mg twice daily for 45 days)<br>placebo | Mortality<br>Admission to hospital<br>Venous thromboembolism<br>Clinically important bleeding |
| Corral-Gudino, 2020<br>GLUCOCOVID <sup>80</sup> | Peer-reviewed publication<br>2020-001934-37 | 64  | Spain         | 69.8     | 60.9   | Respiratory condition (7.8%)<br>Heart disease (12.5%)<br>Arrhythmia (0.0%)<br>Diabetes (17.2%)<br>Hypertension (46.9%)                    | Inpatient    | Severe (100%) | 0                                      | Mechanical ventilation (0.0%)                                         | methylprednisolone (40 mg twice daily for 3 days, then 20 mg twice daily for 3 days)<br>standard care                                                         | Mortality<br>Mechanical ventilation<br>Duration of hospitalization                            |
| Cremer_1, 2020<br>Three C Study <sup>81</sup>   | Peer-reviewed publication<br>NCT04365153    | 45  | United States | 68.8     | 73.3   | Copd (17.8%)<br>Coronary artery disease (22.2%)<br>Atrial fibrillation or flutter (13.3%)<br>Acute myocardial injury (100.0%)<br>Diabetes | Inpatient    | NR            | 46.7                                   | Supplemental oxygen (44.4%)<br>High-flow or niv (24.4%)<br>lv (22.2%) | canakinumab (600 mg) (600 mg single dose based on weight over 2 hours)<br>canakinumab (300 mg) (300 mg single dose based on weight over 2 hours)<br>placebo   | Mortality<br>Time to symptom/clinical improvement                                             |

| Study                                      | Publication status<br>Registration                                       | n   | Country       | Mean age | % Male | Comorbidities                                                                                                               | Type of care | Severity               | % Mechanical ventilation<br>(at baseline) | Detailed ventilation (%)                                             | Treatments (dose and duration)                                                                                                                                | Outcomes                                                                                                                              |
|--------------------------------------------|--------------------------------------------------------------------------|-----|---------------|----------|--------|-----------------------------------------------------------------------------------------------------------------------------|--------------|------------------------|-------------------------------------------|----------------------------------------------------------------------|---------------------------------------------------------------------------------------------------------------------------------------------------------------|---------------------------------------------------------------------------------------------------------------------------------------|
|                                            |                                                                          |     |               |          |        | (46.7%)<br>Hypertension<br>(71.1%)                                                                                          |              |                        |                                           |                                                                      |                                                                                                                                                               |                                                                                                                                       |
| Cremer_2, 2021<br>MASH-COVID <sup>82</sup> | Peer-reviewed publication<br>NCT04399980,<br>NCT04463004,<br>NCT04492514 | 40  | United States | 56.7     | 65     | Chronic obstructive pulmonary disease (7.5%)<br>Coronary artery disease (10.0%)<br>Diabetes (42.5%)<br>Hypertension (55.0%) | Inpatient    | Severe (100%)          | 50                                        | Supplemental oxygen (50.0%)<br>High-flow or niv (50.0%)<br>lv (0.0%) | mavrilimumab (6mg/kg single intravenous infusion)<br>placebo                                                                                                  | Mortality<br>Mechanical ventilation<br>Duration of hospitalization<br>Duration of ventilation<br>Time to symptom/clinical improvement |
| Criner, 2020 <sup>83</sup>                 | Published<br>NCT04252664                                                 | 584 | China         | 57       | 61     | Asthma (11.0%)<br>Hypertension (39.0%)                                                                                      | Inpatient    | Mild/Moderate (100.0%) | 0                                         | Unspecified ventilation (0.0%)                                       | remdesivir (5 days) (200 mg on day 1, then 100 mg daily for 5 days)<br>remdesivir (10 days) (200 mg on day 1, then 100 mg daily for 10 days)<br>standard care | Mortality<br>Adverse effects leading to discontinuation                                                                               |

| Study                                         | Publication status<br>Registration               | n   | Country | Mean age | % Male | Comorbidities                                                                                                  | Type of care | Severity                                | % Mechanical ventilation (at baseline) | Detailed ventilation (%) | Treatments (dose and duration)                                                                                                   | Outcomes                                                                                                                                            |
|-----------------------------------------------|--------------------------------------------------|-----|---------|----------|--------|----------------------------------------------------------------------------------------------------------------|--------------|-----------------------------------------|----------------------------------------|--------------------------|----------------------------------------------------------------------------------------------------------------------------------|-----------------------------------------------------------------------------------------------------------------------------------------------------|
| Crippa, 2021<br>CANDIDATE <sup>84</sup>       | Peer-reviewed publication<br>NCT04467918         | 105 | Brazil  | 39.7     | 34.1   | Asthma (3.3%)<br>Diabetes (2.2%)<br>Hypertension (4.4%)                                                        | Outpatient   | NR                                      | NR                                     | NR                       | cannabidiol (150 mg twice daily for 14 days)<br>placebo                                                                          | Mortality<br>Admission to hospital<br>Adverse effects leading to discontinuation<br>Time to symptom/clinical improvement<br>Time to viral clearance |
| Cruz, 2020<br>ATENEA-Co-300 <sup>85</sup>     | Peer-reviewed publication<br>IG/CIGB300I/CV/2001 | 20  | Cuba    | 45.4     | 70     | Diabetes (0.0%)<br>Hypertension (25.0%)                                                                        | Inpatient    | Mild/Moderate (90.0%)<br>Severe (10.0%) | NR                                     | NR                       | anti-CK2 synthetic peptide (2.5 mg/kg/day for 5 days)<br>standard care                                                           | Adverse effects leading to discontinuation<br>Time to viral clearance                                                                               |
| Darazam_1, 2021<br>COVIFERON II <sup>86</sup> | Peer-reviewed publication<br>NCT04521400         | 168 | Iran    | 59.8     | 61.9   | Copd (1.2%)<br>Asthma (1.8%)<br>Coronary heart disease (14.9%)<br>Ischemic heart disease (18.7%)<br>Congestive | Inpatient    | Severe (100%)                           | NR                                     | NR                       | interferon beta-1a (high-dose) (subcutaneous) (88 µg/day on days 1, 3 and 6)<br>interferon beta-1a (low-dose) (subcutaneous) (44 | Mortality<br>Duration of hospitalization<br>Time to symptom/clinical                                                                                |

| Study                                      | Publication status<br>Registration       | n   | Country | Mean age | % Male | Comorbidities                                                                                       | Type of care | Severity      | % Mechanical ventilation (at baseline) | Detailed ventilation (%) | Treatments (dose and duration)                                                                                                                  | Outcomes                                                                                                                                                 |
|--------------------------------------------|------------------------------------------|-----|---------|----------|--------|-----------------------------------------------------------------------------------------------------|--------------|---------------|----------------------------------------|--------------------------|-------------------------------------------------------------------------------------------------------------------------------------------------|----------------------------------------------------------------------------------------------------------------------------------------------------------|
|                                            |                                          |     |         |          |        | heart failure (11.4%)<br>Cerebrovascular disease (5.4%)<br>Diabetes (26.8%)<br>Hypertension (37.3%) |              |               |                                        |                          | µg/day on days 1, 3 and 6)                                                                                                                      | improvement                                                                                                                                              |
| Darazam_2, 2021<br>COVIFERON <sup>87</sup> | Peer-reviewed publication<br>NCT04343768 | 60  | Iran    | 69       | 51.7   | Coronary heart disease (16.7%)<br>Diabetes (23.3%)<br>Hypertension (33.3%)                          | Inpatient    | Severe (100%) | NR                                     | NR                       | interferon beta-1a (subcutaneous) (44 µg on days 1, 3 and 6)<br>Interferon beta-1b (subcutaneous) (0.25 mg on days 1, 3 and 6)<br>standard care | Mortality<br>Mechanical ventilation<br>Adverse effects leading to discontinuation<br>Duration of hospitalization<br>Time to symptom/clinical improvement |
| Darazam_3, 2021 <sup>88</sup>              | Peer-reviewed publication<br>NCT04350684 | 101 | Iran    | 61.2     | 56.4   | Asthma (5.9%)<br>Coronary heart disease (10.9%)<br>Ischemic heart disease (22.8%)                   | Inpatient    | Severe (100%) | NR                                     | NR                       | umifenovir (200 mg three times daily for 7 days)<br>standard care                                                                               | Mortality<br>Mechanical ventilation<br>Adverse effects leading to discontinuation                                                                        |

| Study                         | Publication status<br>Registration                 | n  | Country | Mean age | % Male | Comorbidities                                                             | Type of care                         | Severity      | % Mechanical ventilation<br>(at baseline) | Detailed ventilation (%)               | Treatments (dose and duration)                                                                                                                                                 | Outcomes                                                                                             |
|-------------------------------|----------------------------------------------------|----|---------|----------|--------|---------------------------------------------------------------------------|--------------------------------------|---------------|-------------------------------------------|----------------------------------------|--------------------------------------------------------------------------------------------------------------------------------------------------------------------------------|------------------------------------------------------------------------------------------------------|
|                               |                                                    |    |         |          |        | Diabetes (30.7%)<br>Hypertension (44.5%)                                  |                                      |               |                                           |                                        |                                                                                                                                                                                | on<br>Duration of hospitalization<br>Duration of ventilation<br>Time to symptom/clinical improvement |
| Darban, 2021 <sup>89</sup>    | Peer-reviewed publication<br>IRCT20151228025732N52 | 20 | Iran    | 59       | 65     | NR                                                                        | Inpatient<br>Intensive care (100.0%) | Severe (100%) | NR                                        | NR                                     | melatonin (6 mg four times daily for 10 days)<br>vitamin C (2 g four times daily for 10 days)<br>zinc sulfate (220 mg and 50 mg four times daily for 10 days)<br>standard care | ICU length of stay                                                                                   |
| Davoodi, 2020 <sup>90</sup>   | Published<br>IRCT2019072704434N1                   | 60 | Iran    | 57.7     | 59.3   | Lung disease (1.9%)<br>Diabetes (27.8%)                                   | Outpatient                           | NR            | 0                                         | Supplemental oxygen, niv, or iv (0.0%) | febuxostat (80 mg once daily for 5 days)<br>hydroxychloroquine (200 mg twice daily for 5 days)                                                                                 | Mortality<br>Admission to hospital                                                                   |
| Davoodi_2, 2021 <sup>91</sup> | Peer-reviewed publication<br>IRCT20190727044343N2  | 40 | Iran    | 46       | 52.5   | Lung diseases (7.5%)<br>Cardiovascular disease (0.0%)<br>Diabetes (12.5%) | Inpatient                            | Severe (100%) | NR                                        | NR                                     | atorvastatin (40 mg once daily for 5 days)<br>placebo                                                                                                                          | Mechanical ventilation<br>Duration of hospitalization                                                |

| Study                                | Publication status<br>Registration                 | n  | Country | Mean age | % Male | Comorbidities                                                                                              | Type of care | Severity      | % Mechanical ventilation (at baseline) | Detailed ventilation (%)                                             | Treatments (dose and duration)                                                               | Outcomes                                                                                                                                                                                                  |
|--------------------------------------|----------------------------------------------------|----|---------|----------|--------|------------------------------------------------------------------------------------------------------------|--------------|---------------|----------------------------------------|----------------------------------------------------------------------|----------------------------------------------------------------------------------------------|-----------------------------------------------------------------------------------------------------------------------------------------------------------------------------------------------------------|
|                                      |                                                    |    |         |          |        | Hypertension (15.0%)                                                                                       |              |               |                                        |                                                                      |                                                                                              |                                                                                                                                                                                                           |
| Davoodian, 2021 <sup>92</sup>        | Pre-print<br>IRCT20200408046988N1                  | 96 | Iran    | 56.2     | 56.8   | Heart disease (19.8%)<br>Diabetes (14.8%)<br>Hypertension (18.5%)                                          | Inpatient    | NR            | NR                                     | Intubated (0.0%)                                                     | melatonin (3 mg three times daily for 2 weeks)<br>placebo                                    | NR                                                                                                                                                                                                        |
| Davoudi-Monfared, 2020 <sup>93</sup> | Peer-reviewed publication<br>IRCT20100228003449N28 | 92 | Iran    | 58.7     | 54.3   | Asthma (1.2%)<br>Copd (1.2%)<br>Ischemic heart disease (28.4%)<br>Diabetes (27.2%)<br>Hypertension (38.3%) | Inpatient    | Severe (100%) | 29.6                                   | Supplemental oxygen (69.1%)<br>High-flow or niv (4.9%)<br>lv (24.7%) | interferon beta-1a (subcutaneous) (44 µg/ml three times weekly for 14 days)<br>standard care | Mortality<br>Mechanical ventilation<br>Adverse effects leading to discontinuation<br>Duration of hospitalization<br>ICU length of stay<br>Duration of ventilation<br>Time to symptom/clinical improvement |

| Study                                            | Publication status<br>Registration         | n   | Country | Mean age | % Male | Comorbidities                                                                                                                                    | Type of care                         | Severity                                   | % Mechanical ventilation (at baseline) | Detailed ventilation (%)                                             | Treatments (dose and duration)                                                                                      | Outcomes                                                                                                                 |
|--------------------------------------------------|--------------------------------------------|-----|---------|----------|--------|--------------------------------------------------------------------------------------------------------------------------------------------------|--------------------------------------|--------------------------------------------|----------------------------------------|----------------------------------------------------------------------|---------------------------------------------------------------------------------------------------------------------|--------------------------------------------------------------------------------------------------------------------------|
| Defteros, 2020<br>GRECCO-19 <sup>94</sup>        | Published<br>NCT04326790                   | 110 | Greece  | 64       | 58.1   | Copd (4.8%)<br>Coronary artery disease (13.3%)<br>Valvulopathy (4.8%)<br>Atrial fibrillation (10.5%)<br>Diabetes (20.0%)<br>Hypertension (44.8%) | Inpatient                            | Severe (100%)                              | 2.9                                    | Supplemental oxygen (62.9%)<br>High-flow or niv (2.9%)               | colchicine (0.5 mg twice daily for 21 days)<br>standard care                                                        | Mortality<br>Mechanical ventilation<br>Adverse effects leading to discontinuation<br>Duration of hospitalization         |
| Delgado-Enciso, 2021<br>TX-COVID19 <sup>95</sup> | Peer-reviewed publication<br>RPCEC00000309 | 217 | Mexico  | 43.7     | 50.3   | Asthma (5.2%)<br>Ischemic heart disease (0.0%)<br>Diabetes (16.4%)<br>Hypertension (16.8%)                                                       | Outpatient                           | Mild/Moderate (88.8000000000001%)          | NR                                     | NR                                                                   | electrolyzed saline (15 ml/day for 7 days, with successive increases up to 30 ml/day if indicated)<br>standard care | Mortality<br>Admission to hospital<br>Adverse effects leading to discontinuation<br>Time to symptom/clinical improvement |
| Dequin, 2020<br>CAPECOVID <sup>96</sup>          | Peer-reviewed publication<br>NCT02517489   | 149 | France  | 62.2     | 69.8   | Chronic obstructive pulmonary disease (4.0%)<br>Asthma (3.4%)<br>Congestive                                                                      | Inpatient<br>Intensive care (100.0%) | Severe (100%)<br>Severe: Critical (100.0%) | 94                                     | Nonrebreathing mask with a reservoir bag (6.0%)<br>High-flow (12.8%) | hydrocortisone (200 mg once daily for 7 days, followed by 100 mg once daily for 4 days, and 50 mg once              | Mortality<br>Mechanical ventilation                                                                                      |

| Study                           | Publication status<br>Registration       | n   | Country  | Mean age | % Male | Comorbidities                                                                                             | Type of care | Severity | % Mechanical ventilation<br>(at baseline) | Detailed ventilation (%) | Treatments (dose and duration)                                                                                   | Outcomes                                                                                    |
|---------------------------------|------------------------------------------|-----|----------|----------|--------|-----------------------------------------------------------------------------------------------------------|--------------|----------|-------------------------------------------|--------------------------|------------------------------------------------------------------------------------------------------------------|---------------------------------------------------------------------------------------------|
|                                 |                                          |     |          |          |        | heart failure (4.0%)<br>Cerebrovascular disease (1.3%)<br>Diabetes (18.1%)                                |              |          |                                           | Niv or iv (81.2%)        | daily for 3 days)<br>placebo                                                                                     |                                                                                             |
| Di Domenico, 2021 <sup>97</sup> | Peer-reviewed publication<br>RBR-6sx3sz  | 40  | Brazil   | NR       | 37.1   | Respiratory condition (8.6%)<br>Cardiovascular disease (8.6%)<br>Diabetes (28.6%)<br>Hypertension (48.6%) | NR           | NR       | NR                                        | NR                       | hydrogen peroxide (1% H2O2 for gargling and 0.5% H2O2 for a nasal wash, three times a day for 7 days)<br>placebo | Duration of hospitalization<br>Time to symptom/clinical improvement                         |
| Di Pierro_1, 2021 <sup>98</sup> | Peer-reviewed publication<br>NCT04578158 | 152 | Pakistan | NR       | 57.9   | NR                                                                                                        | Outpatient   | NR       | NR                                        | NR                       | quercetin (200 mg twice daily for 30 days)<br>standard care                                                      | Mortality<br>Mechanical ventilation<br>Admission to hospital<br>Duration of hospitalization |
| Di Pierro_2, 2021 <sup>99</sup> | Peer-reviewed publication<br>NCT04861298 | 42  | Pakistan | 49.4     | 47.6   | NR                                                                                                        | Outpatient   | NR       | NR                                        | NR                       | quercetin (200 mg three times daily for week 1)<br>standard care                                                 | Mortality<br>Admission to hospital<br>Adverse effects leading to discontinuati              |

| Study                                     | Publication status<br>Registration                | n   | Country        | Mean age | % Male | Comorbidities                                          | Type of care                         | Severity                                   | % Mechanical ventilation<br>(at baseline) | Detailed ventilation (%)   | Treatments (dose and duration)                                                                                                             | Outcomes                                                                                                                                                    |
|-------------------------------------------|---------------------------------------------------|-----|----------------|----------|--------|--------------------------------------------------------|--------------------------------------|--------------------------------------------|-------------------------------------------|----------------------------|--------------------------------------------------------------------------------------------------------------------------------------------|-------------------------------------------------------------------------------------------------------------------------------------------------------------|
|                                           |                                                   |     |                |          |        |                                                        |                                      |                                            |                                           |                            |                                                                                                                                            | on<br>Viral<br>clearance                                                                                                                                    |
| Doaei, 2021 <sup>100</sup>                | Peer-reviewed publication<br>IRCT20151226025699N3 | 128 | Iran           | 64.5     | 59.4   | Lung diseases (0.0%)<br>Cardiovascular diseases (0.0%) | Inpatient<br>Intensive care (100.0%) | Severe (100%)<br>Severe: Critical (100.0%) | NR                                        | NR                         | omega 3 (docosahexaenoic acid (200 mg daily for 14 days),<br>eicosapentaenoic acid (400 mg daily for 14 days))<br>standard care            | Mortality                                                                                                                                                   |
| Doi, 2020 <sup>101</sup>                  | Peer-reviewed publication<br>jRCTs041190120       | 89  | Japan          | 50       | 61.4   | NR                                                     | Inpatient                            | NR                                         | NR                                        | Supplemental oxygen (3.4%) | favipiravir (early) (800 mg twice daily for 10 days)<br>favipiravir (late) (800 mg twice daily for 10 days starting on day 6 of enrolment) | Mortality<br>Mechanical ventilation<br>Viral clearance<br>Duration of hospitalization<br>Time to symptom/clinical improvement<br>Time to to viral clearance |
| Dorward, 2021<br>PRINCIPLE <sup>102</sup> | Pre-print<br>ISRCTN86534580                       | 276 | United Kingdom | 60.5     | 46.2   | Asthma, copd, lung disease (29.6%)<br>Heart            | Outpatient                           | NR                                         | NR                                        | NR                         | colchicine (500 µg daily for 14 days)<br>standard care                                                                                     | Mortality<br>Mechanical ventilation<br>Duration of                                                                                                          |

| Study                                 | Publication status<br>Registration       | n   | Country        | Mean age | % Male | Comorbidities                                                                                            | Type of care      | Severity               | % Mechanical ventilation<br>(at baseline) | Detailed ventilation (%)    | Treatments (dose and duration)                                                           | Outcomes                                                                                                         |
|---------------------------------------|------------------------------------------|-----|----------------|----------|--------|----------------------------------------------------------------------------------------------------------|-------------------|------------------------|-------------------------------------------|-----------------------------|------------------------------------------------------------------------------------------|------------------------------------------------------------------------------------------------------------------|
|                                       |                                          |     |                |          |        | problems (9.2%)<br>Diabetes (12.7%)<br>Hypertension (24.2%)                                              |                   |                        |                                           |                             |                                                                                          | hospitalization<br>Time to symptom/clinical improvement                                                          |
| Duarte, 2021 <sup>103</sup>           | Peer-reviewed publication<br>NCT04355936 | 162 | Argentina      | 65.3     | 53.2   | Copd (11.4%)<br>Asthma (3.2%)<br>Stroke (7.0%)<br>Diabetes (19.0%)<br>Hypertension (44.9%)               | Inpatient         | NR                     | NR                                        | Supplemental oxygen (68.4%) | telmisartan (80 mg twice daily for 14 days)<br>standard care                             | Mortality<br>Mechanical ventilation<br>Adverse effects leading to discontinuation<br>Duration of hospitalization |
| Dubée, 2021<br>HYCOVID <sup>104</sup> | Peer-reviewed publication<br>NCT04325893 | 250 | France, Monaco | 77       | 48.4   | Chronic respiratory disease (11.2%)<br>Heart disease (28.8%)<br>Diabetes (17.2%)<br>Hypertension (53.2%) | Inpatient (98.8%) | Mild/Moderate (100.0%) | NR                                        | Supplemental oxygen (60.4%) | hydroxychloroquine (400 mg twice for first day, 200mg twice daily for 8 days)<br>placebo | Mortality<br>Mechanical ventilation<br>Adverse effects leading to discontinuation<br>Viral clearance             |

| Study                                   | Publication status<br>Registration                | n   | Country                                                                                                                                                                                            | Mean age | % Male | Comorbidities                                                                                              | Type of care | Severity      | % Mechanical ventilation (at baseline) | Detailed ventilation (%)                                                            | Treatments (dose and duration)                                                | Outcomes                                                                         |
|-----------------------------------------|---------------------------------------------------|-----|----------------------------------------------------------------------------------------------------------------------------------------------------------------------------------------------------|----------|--------|------------------------------------------------------------------------------------------------------------|--------------|---------------|----------------------------------------|-------------------------------------------------------------------------------------|-------------------------------------------------------------------------------|----------------------------------------------------------------------------------|
| EPIC-HR, 2021<br>EPIC-HR <sup>105</sup> | Data from authors<br>NCT04960202                  | 0   | United States, Argentina, Brazil, Bulgaria, Colombia, Czechia, Hungary, India, Japan, Korea, Malaysia, Mexico, Poland, Puerto Rico, Russia, South Africa, Spain, Taiwan, Thailand, Turkey, Ukraine | 44.7     | 52.4   | Chronic lung disease (4.9%)<br>Cardiovascular disease (3.7%)<br>Diabetes (12.8%)<br>Hypertension (32.4%)   | Outpatient   | NR            | NR                                     | Home oxygen (0.0%)                                                                  | nirmatrelvir /ritonavir (300 mg and 100 mg twice daily for 5 days)<br>placebo | Mortality<br>Admission to hospital<br>Adverse effects leading to discontinuation |
| Edalatifard, 2020 <sup>106</sup>        | Peer-reviewed publication<br>IRCT20200404046947N1 | 68  | Iran                                                                                                                                                                                               | 58.5     | 62.9   | Respiratory condition (9.7%)<br>Cardiovascular disease (17.7%)<br>Diabetes (35.5%)<br>Hypertension (32.3%) | Inpatient    | Severe (100%) | 37.1                                   | Nasal cannula (21.0%)<br>Simple mask (11.3%)<br>Reserve mask (29.0%)<br>Niv (37.1%) | methyprednisolone (250 mg/day for 3 days)<br>standard care                    | Mortality<br>Mechanical ventilation<br>Time to symptom/clinical improvement      |
| Eid, 2021 <sup>107</sup>                | Peer-reviewed publication                         | 370 | Egypt                                                                                                                                                                                              | NR       | 43.8   | NR                                                                                                         | NR           | Severe (100%) | NR                                     | NR                                                                                  | cefepime (100 0mg twice daily for 5 days)<br>ceftazidime (1000 mg             | Mortality<br>Time to symptom/cli                                                 |

| Study                           | Publication status<br>Registration | n   | Country       | Mean age | % Male | Comorbidities                                                                                                                                  | Type of care      | Severity               | % Mechanical ventilation (at baseline) | Detailed ventilation (%)                         | Treatments (dose and duration)                                                                                                                                                                                        | Outcomes                                                                                                      |
|---------------------------------|------------------------------------|-----|---------------|----------|--------|------------------------------------------------------------------------------------------------------------------------------------------------|-------------------|------------------------|----------------------------------------|--------------------------------------------------|-----------------------------------------------------------------------------------------------------------------------------------------------------------------------------------------------------------------------|---------------------------------------------------------------------------------------------------------------|
|                                 |                                    |     |               |          |        |                                                                                                                                                |                   |                        |                                        |                                                  | three times daily for 5 days)<br>standard care                                                                                                                                                                        | nical<br>improvement                                                                                          |
| El-Bendary, 2021 <sup>108</sup> | Peer-reviewed publication          | 174 | Egypt         | 53       | 54.6   | Asthma (1.7%)<br>Pulmonary fibrosis (0.6%)<br>Cardiac disease (10.9%)<br>Cvt, pe, or stroke (3.5%)<br>Diabetes (37.4%)<br>Hypertension (21.3%) | Inpatient (79.3%) | NR                     | 2.3                                    | Nasal prong or facial mask (63.8%)<br>Niv (2.3%) | sofosbuvir-daclatasvir (400 mg of sofosbuvir and 60 mg of daclatasvir given once daily for 14 days)<br>standard care                                                                                                  | Mortality<br>Mechanical ventilation<br>Viral clearance<br>Duration of hospitalization                         |
| Elamir, 2021 <sup>109</sup>     | Data from authors                  | 50  | United States | NR       | NR     | NR                                                                                                                                             | Inpatient         | NR                     | NR                                     | NR                                               | vitamin D (0.5 mcg daily for 14 days or until hospital discharge)<br>standard care                                                                                                                                    | Mortality<br>Duration of hospitalization                                                                      |
| Elgohary, 2021 <sup>110</sup>   | Pre-print<br>NCT04530422           | 250 | Egypt         | 43.5     | 0.5    | NR                                                                                                                                             | Inpatient         | Mild/Moderate (100.0%) | 0                                      | Mechanical ventilation (0.0%)                    | ledipasvir (once daily for 15 days) sofosbuvir ( )<br>azithromycin (500mg once then 250mg daily for 6 days)<br>hydroxychloroquine (400mg every 12 hours for one day then 200mg every 12 hours for 9 days) oseltamivir | Mortality<br>Adverse effects leading to discontinuation<br>Duration of hospitalization<br>Time to symptom/cli |

| Study                                              | Publication status<br>Registration | n   | Country                                  | Mean age | % Male | Comorbidities                                                                  | Type of care | Severity                                   | % Mechanical ventilation<br>(at baseline) | Detailed ventilation (%) | Treatments (dose and duration)                                                      | Outcomes                                                                                                                                                                                                |
|----------------------------------------------------|------------------------------------|-----|------------------------------------------|----------|--------|--------------------------------------------------------------------------------|--------------|--------------------------------------------|-------------------------------------------|--------------------------|-------------------------------------------------------------------------------------|---------------------------------------------------------------------------------------------------------------------------------------------------------------------------------------------------------|
|                                                    |                                    |     |                                          |          |        |                                                                                |              |                                            |                                           |                          | (150mg every 12 hours for 10 days)                                                  | nical improvement<br>Time to to viral clearance                                                                                                                                                         |
| Ely, 2021<br>COV-BARRIER addendum <sup>111</sup>   | Pre-print<br>NCT04421027           | 101 | Argentina, Brazil, Mexico, United States | 58.6     | 54.5   | Chronic respiratory disease (3.0%)<br>Diabetes (35.6%)<br>Hypertension (54.5%) | Inpatient    | Severe (100%)<br>Severe: Critical (100.0%) | 100                                       | Iv or ecmo (100.0%)      | baricitinib (4 mg daily for 14 days or until discharge)<br>placebo                  | Mortality<br>Adverse effects leading to discontinuation<br>Duration of hospitalization<br>ICU length of stay<br>Ventilator-free days<br>Duration of ventilation<br>Time to symptom/clinical improvement |
| Esquivel-Moynelo, 2020<br>ESPERANZA <sup>112</sup> | Pre-print<br>RPCEC00000307         | 79  | Cuba                                     | 38       | 54     | Asthma (6.3%)<br>Cardiac diseases (6.3%)<br>Severe arterial hypertension       | Inpatient    | NR                                         | NR                                        | NR                       | interferon gamma (subcutaneous) (0.5 MIU twice weekly for 14 days)<br>standard care | Mortality<br>Viral clearance<br>Time to to                                                                                                                                                              |

| Study                                | Publication status<br>Registration                 | n   | Country       | Mean age | % Male | Comorbidities                                                                                          | Type of care | Severity      | % Mechanical ventilation<br>(at baseline) | Detailed ventilation (%)         | Treatments (dose and duration)                                                                                             | Outcomes                                                           |
|--------------------------------------|----------------------------------------------------|-----|---------------|----------|--------|--------------------------------------------------------------------------------------------------------|--------------|---------------|-------------------------------------------|----------------------------------|----------------------------------------------------------------------------------------------------------------------------|--------------------------------------------------------------------|
|                                      |                                                    |     |               |          |        | (0.0%)<br>Ischemic heart disease (0.0%)<br>Diabetes (4.8%)<br>Hypertension (22.2%)                     |              |               |                                           |                                  |                                                                                                                            | viral clearance                                                    |
| Esther, 2021 <sup>113</sup>          | Pre-print<br>NCT04347538                           | 88  | United States | 40.7     | 48.6   | Chronic lung disease (12.5%)<br>Heart disease (4.2%)<br>Diabetes (8.3%)<br>Hypertension (19.4%)        | Outpatient   | NR            | 0                                         | Unspecified ventilation (0.0%)   | hypertonic saline (Twice daily irrigation)<br>surfactant ()<br>hypertonic saline (Twice daily irrigation)<br>standard care | NR                                                                 |
| Ezer, 2021<br>CONTAIN <sup>114</sup> | Peer-reviewed publication<br>NCT04435795           | 215 | Canada        | 35       | 46.3   | Asthma, no treatment (4.9%)<br>Ischemic heart disease (0.5%)<br>Diabetes (2.5%)<br>Hypertension (5.9%) | Outpatient   | NR            | 0                                         | Unspecified ventilation (0.0%)   | ciclesonide (50 µg twice daily intranasally, or 600 µg twice daily inhaled, for 14 days)<br>placebo                        | Mortality<br>Admission to hospital                                 |
| Fakharian, 2021 <sup>115</sup>       | Peer-reviewed publication<br>IRCT20151227025726N23 | 68  | Iran          | 54.6     | 58.8   | Copd (1.5%)<br>Tuberculosis (0.0%)<br>Ischemic heart disease (4.4%)<br>Diabetes                        | Inpatient    | Severe (100%) | 100                                       | Unspecified ventilation (100.0%) | adalimumab (40 mg single dose given subcutaneously)<br>standard care                                                       | Mortality<br>Mechanical ventilation<br>Duration of hospitalization |

| Study                         | Publication status<br>Registration       | n  | Country | Mean age | % Male | Comorbidities                                                             | Type of care                         | Severity      | % Mechanical ventilation<br>(at baseline) | Detailed ventilation (%) | Treatments (dose and duration)                                                                                      | Outcomes                                                                                                                       |
|-------------------------------|------------------------------------------|----|---------|----------|--------|---------------------------------------------------------------------------|--------------------------------------|---------------|-------------------------------------------|--------------------------|---------------------------------------------------------------------------------------------------------------------|--------------------------------------------------------------------------------------------------------------------------------|
|                               |                                          |    |         |          |        | (27.9%)<br>Hypertension<br>(29.4%)                                        |                                      |               |                                           |                          |                                                                                                                     | ICU length of stay                                                                                                             |
| Farahani, 2020 <sup>116</sup> | Pre-print<br>IRCT20200406046963N1        | 29 | Iran    | 64       | 65.5   | Uncontrolled diabetes mellitus (0.0%)                                     | Inpatient<br>Intensive care (100.0%) | Severe (100%) | NR                                        | NR                       | methylprednisolone (1000 mg/day for 3 days) prednisolone (1 mg/kg with tapering of dose over 10 days) standard care | Mortality<br>Mechanical ventilation<br>ICU length of stay                                                                      |
| Farnoosh, 2021 <sup>117</sup> | Peer-reviewed publication<br>NCT04409522 | 74 | Iran    | 51.8     | 59.1   | Cardiovascular disease (6.8%)<br>Diabetes (22.7%)<br>Hypertension (25.0%) | Inpatient                            | NR            | NR                                        | NR                       | melatonin (3 mg three times daily for 14 days) standard care                                                        | Mortality<br>Adverse effects leading to discontinuation<br>Duration of hospitalization<br>Time to symptom/clinical improvement |
| Feld, 2020 <sup>118</sup>     | Peer-reviewed publication<br>NCT04354259 | 60 | Canada  | 46.7     | 58.3   | Diabetes (5.0%)<br>Hypertension (10.0%)                                   | Outpatient                           | NR            | NR                                        | NR                       | peginterferon lambda (subcutaneous) (180 µg single injection) placebo                                               | Mortality<br>Admission to hospital<br>Viral clearance<br>Time to to                                                            |

| Study                           | Publication status<br>Registration       | n   | Country       | Mean age | % Male | Comorbidities                                                                                                   | Type of care | Severity      | % Mechanical ventilation<br>(at baseline) | Detailed ventilation (%)                  | Treatments (dose and duration)                                                                                                                                                           | Outcomes                                                                                                                          |
|---------------------------------|------------------------------------------|-----|---------------|----------|--------|-----------------------------------------------------------------------------------------------------------------|--------------|---------------|-------------------------------------------|-------------------------------------------|------------------------------------------------------------------------------------------------------------------------------------------------------------------------------------------|-----------------------------------------------------------------------------------------------------------------------------------|
|                                 |                                          |     |               |          |        |                                                                                                                 |              |               |                                           |                                           |                                                                                                                                                                                          | viral clearance                                                                                                                   |
| Fiorentino, 2021 <sup>119</sup> | Peer-reviewed publication<br>NCT04637906 | 101 | Italy         | 61.6     | 81.2   | Chronic pulmonary disease (0.0%)<br>Coronary artery disease (14.4%)<br>Diabetes (10.0%)<br>Hypertension (36.6%) | Inpatient    | Severe (100%) | 5.5                                       | Hfnc (67.8%)<br>Cpap (7.8%)<br>Niv (5.5%) | L-arginine (1.66 g twice daily)<br>placebo                                                                                                                                               | Mortality<br>Adverse effects leading to discontinuation<br>Duration of hospitalization<br>Time to to viral clearance              |
| Fischer, 2021 <sup>120</sup>    | Pre-print<br>NCT04405570                 | 202 | United States | 40.1     | 48.5   | NR                                                                                                              | Outpatient   | NR            | NR                                        | NR                                        | molnupiravir (200 mg) (200 mg twice per day for 5 days)<br>molnupiravir (400 mg) (400 mg twice per day for 5 days)<br>molnupiravir (800 mg) (800 mg twice per day for 5 days)<br>placebo | Mortality<br>Admission to hospital<br>Adverse effects leading to discontinuation<br>Viral clearance<br>Time to to viral clearance |

| Study                                          | Publication status<br>Registration                    | n   | Country        | Mean age | % Male | Comorbidities                                                                                   | Type of care                        | Severity      | % Mechanical ventilation<br>(at baseline) | Detailed ventilation (%)                | Treatments (dose and duration)                                                                        | Outcomes                                                                                                                                    |
|------------------------------------------------|-------------------------------------------------------|-----|----------------|----------|--------|-------------------------------------------------------------------------------------------------|-------------------------------------|---------------|-------------------------------------------|-----------------------------------------|-------------------------------------------------------------------------------------------------------|---------------------------------------------------------------------------------------------------------------------------------------------|
| Fisher_1, 2021<br>CATALYST <sup>121</sup>      | Pre-print<br>EudraCT2020-001684-89,<br>ISRCTN40580903 | 111 | United Kingdom | 59.4     | 64     | Chronic obstructive pulmonary disease, asthma, interstitial lung disease (23.4%)                | Inpatient<br>Intensive care (40.5%) | NR            | 51.4                                      | High-flow or cpap (31.5%)<br>lv (19.8%) | namilumab (150 mg given as a single intravenous dose over 1 hour on day 1)<br>standard care           | Mortality<br>Mechanical ventilation<br>Time to symptom/clinical improvement                                                                 |
| Fisher_2, 2021<br>CATALYST <sup>121</sup>      | Pre-print<br>EudraCT2020-001684-89,<br>ISRCTN40580903 | 69  | United Kingdom | 59.9     | 58     | Chronic obstructive pulmonary disease, asthma, interstitial lung disease (26.5%)                | Inpatient<br>Intensive care (36.2%) | NR            | NR                                        | NR                                      | infliximab (5 mg/kg given as a single intravenous dose over 2 hours on day 1)<br>standard care        | Mortality<br>Mechanical ventilation<br>Time to symptom/clinical improvement                                                                 |
| Fragoso-Saavedra, 2021<br>PISCO <sup>122</sup> | Pre-print<br>NCT04343963                              | 188 | Mexico         | 52       | 59.6   | Chronic lung disease (4.3%)<br>Heart disease (2.1%)<br>Diabetes (36.2%)<br>Hypertension (35.1%) | Inpatient                           | Severe (100%) | NR                                        | Supplemental oxygen (100.0%)            | pyridostigmine (60 mg daily until prespecified outcomes, discharge or 14 in-hospital days)<br>placebo | Mortality<br>Mechanical ventilation<br>Adverse effects leading to discontinuation<br>Duration of hospitalization<br>Duration of ventilation |

| Study                                        | Publication status<br>Registration            | n   | Country  | Mean age | % Male | Comorbidities                                                                                                                   | Type of care                        | Severity               | % Mechanical ventilation (at baseline) | Detailed ventilation (%)                            | Treatments (dose and duration)                                                                                                   | Outcomes                                                                                                                             |
|----------------------------------------------|-----------------------------------------------|-----|----------|----------|--------|---------------------------------------------------------------------------------------------------------------------------------|-------------------------------------|------------------------|----------------------------------------|-----------------------------------------------------|----------------------------------------------------------------------------------------------------------------------------------|--------------------------------------------------------------------------------------------------------------------------------------|
| Fu, 2020 <sup>123</sup>                      | Peer-reviewed publication<br>ChiCTR2000030262 | 80  | China    | 35.2     | 63.8   | Diabetes (3.8%)<br>Hypertension (5.0%)                                                                                          | Inpatient                           | Mild/Moderate (100.0%) | NR                                     | NR                                                  | interferon kappa (nebulised) (2 mg/day for 6 days) trefoil factor 2 (5 mg/day for 6 days) standard care                          | Mortality<br>Adverse effects leading to discontinuation<br>Viral clearance<br>Duration of hospitalization<br>Time to viral clearance |
| Furtado, 2020<br>COALITION II <sup>124</sup> | Peer-reviewed publication<br>NCT04321278      | 447 | Brazil   | 60.2     | 64     | Copd (6.7%)<br>Heart failure (5.6%)<br>Previous stroke (4.0%)<br>Previous mi (4.5%)<br>Diabetes (38.0%)<br>Hypertension (60.9%) | Inpatient                           | Severe (100%)          | 50.3                                   | Unspecified ventilation (50.3%)                     | azithromycin (500 mg daily for 10 days) standard care                                                                            | Mortality<br>Mechanical ventilation<br>Duration of hospitalization<br>Ventilator-free days                                           |
| Gaitain-Duarte, 2021 <sup>125</sup>          | Pre-print<br>NCT04359095                      | 649 | Colombia | 55.4     | 67.6   | Chronic respiratory disease (4.4%)<br>Cardiovascular disease (2.7%)<br>Diabetes (12.0%)                                         | Inpatient<br>Intensive care (26.7%) | NR                     | 82.8                                   | Niv (66.0%)<br>High-flow oxygen (9.0%)<br>lv (7.7%) | colchicine (0.5 mg twice a day for 14 days) rosuvastatin (40 mg once a day for 14 days)<br>colchicine (0.5 mg twice a day for 14 | Mortality<br>Mechanical ventilation<br>Adverse effects leading to discontinuation                                                    |

| Study                            | Publication status<br>Registration       | n   | Country       | Mean age | % Male | Comorbidities                                                                 | Type of care     | Severity      | % Mechanical ventilation (at baseline) | Detailed ventilation (%)                                | Treatments (dose and duration)                                                                                                                                                                | Outcomes                                                                                                         |
|----------------------------------|------------------------------------------|-----|---------------|----------|--------|-------------------------------------------------------------------------------|------------------|---------------|----------------------------------------|---------------------------------------------------------|-----------------------------------------------------------------------------------------------------------------------------------------------------------------------------------------------|------------------------------------------------------------------------------------------------------------------|
|                                  |                                          |     |               |          |        | Hypertension (27.8%)                                                          |                  |               |                                        |                                                         | days) emtricitabine-tenofovir (200 mg/300 mg once a day for 10 days) rosuvastatin (40 mg once a day for 14 days) emtricitabine-tenofovir (200 mg/300 mg once a day for 10 days) standard care | on<br>Duration of hospitalization                                                                                |
| Galan, 2021 <sup>126</sup>       | Peer-reviewed publication<br>RBR-8h7q82  | 168 | Brazil        | 53.4     | 56.5   | Previous pulmonary disease (5.4%)<br>Diabetes (26.8%)<br>Hypertension (41.1%) | Inpatient        | Severe (100%) | NR                                     | NR                                                      | chloroquine (450 mg once daily for 5 days)<br>hydroxychloroquine (400 mg once daily for 5 days)<br>ivermectin (10 mg to 14 mg once daily for 3 days based on weight)                          | Mortality<br>Mechanical ventilation                                                                              |
| Geriak, 2021 <sup>127</sup>      | Peer-reviewed publication<br>NCT04340557 | 32  | United States | 57.1     | 61.3   | Cardiovascular disease (3.2%)<br>Diabetes (25.8%)<br>Hypertension (38.7%)     | Inpatient        | NR            | 0                                      | Nasal cannula (100.0%)<br>Mechanical ventilation (0.0%) | losartan (12.5 mg twice daily for 10 days)<br>standard care                                                                                                                                   | Mortality<br>Mechanical ventilation<br>Adverse effects leading to discontinuation<br>Duration of hospitalization |
| Ghaderkhani, 2020 <sup>128</sup> | Pre-print<br>IR.TUMS.VCR.                | 56  | Iran          | 44.4     | 60.4   | NR                                                                            | Inpatient (3.8%) | NR            | NR                                     | NR                                                      | umifenovir (200 mg every twelve hours for                                                                                                                                                     | NR                                                                                                               |

| Study                           | Publication status<br>Registration                | n   | Country       | Mean age | % Male | Comorbidities                                                                                                       | Type of care | Severity      | % Mechanical ventilation (at baseline) | Detailed ventilation (%)                                                         | Treatments (dose and duration)                                                                                                                                                                                                                                                                   | Outcomes                                                                                                                                                 |
|---------------------------------|---------------------------------------------------|-----|---------------|----------|--------|---------------------------------------------------------------------------------------------------------------------|--------------|---------------|----------------------------------------|----------------------------------------------------------------------------------|--------------------------------------------------------------------------------------------------------------------------------------------------------------------------------------------------------------------------------------------------------------------------------------------------|----------------------------------------------------------------------------------------------------------------------------------------------------------|
|                                 | REC.1399.204, 04.13.2020                          |     |               |          |        |                                                                                                                     |              |               |                                        |                                                                                  | 10 days) standard care                                                                                                                                                                                                                                                                           |                                                                                                                                                          |
| Ghandehari, 2021 <sup>129</sup> | Peer-reviewed publication<br>NCT04365127          | 42  | United States | 55.2     | 100    | Diabetes (25.0%)<br>Hypertension (47.5%)                                                                            | Inpatient    | Severe (100%) | 7.5                                    | Supplemental oxygen (77.5%)<br>High-flow (7.5%)<br>Mechanical ventilation (0.0%) | progesterone (100 mg twice daily for up to 5 days)<br>standard care                                                                                                                                                                                                                              | Mortality<br>Mechanical ventilation<br>Adverse effects leading to discontinuation<br>Duration of hospitalization<br>Time to symptom/clinical improvement |
| Ghanei, 2021 <sup>130</sup>     | Peer-reviewed publication<br>IRCT20200318046812N2 | 352 | Iran          | 58.1     | 51.5   | Chronic lung disease, not asthma (4.5%)<br>Chronic heart disease (8.9%)<br>Diabetes (12.2%)<br>Hypertension (24.7%) | Inpatient    | Severe (100%) | NR                                     | NR                                                                               | azithromycin (250 mg once daily for 5 days)<br>naproxen (250 mg twice daily for 5 days)<br>prednisolone (25 mg once daily for 5 days)<br>azithromycin (250 mg once daily for 5 days)<br>naproxen (250 mg twice daily for 5 day)<br>lopinavir-ritonavir (200 mg and 50 mg twice daily for 7 days) | Mortality<br>Mechanical ventilation<br>Duration of hospitalization<br>Time to symptom/clinical improvement                                               |

| Study                                | Publication status<br>Registration       | n   | Country                                                                          | Mean age | % Male | Comorbidities                                                        | Type of care | Severity      | % Mechanical ventilation (at baseline) | Detailed ventilation (%)                                             | Treatments (dose and duration)                                                                                                                                                                   | Outcomes                                                                                                                                                 |
|--------------------------------------|------------------------------------------|-----|----------------------------------------------------------------------------------|----------|--------|----------------------------------------------------------------------|--------------|---------------|----------------------------------------|----------------------------------------------------------------------|--------------------------------------------------------------------------------------------------------------------------------------------------------------------------------------------------|----------------------------------------------------------------------------------------------------------------------------------------------------------|
| Ghati, 2021<br>RESIST <sup>131</sup> | Pre-print<br>CTRI/2020/07/026791         | 900 | India                                                                            | 53.1     | 73.7   | Cad (1.1%)<br>Lvd (0.1%)<br>Diabetes (27.7%)<br>Hypertension (28.6%) | Inpatient    | NR            | 2.8                                    | High-flow or niv (2.8%)<br>lv (0.0%)                                 | atorvastatin (40 mg daily for 10-days or discharge)<br>aspirin (75 mg daily for 10 days or discharge)<br>aspirin (45 mg + 75 mg daily for 10 days or discharge) atorvastatin ()<br>standard care | Mortality<br>Mechanical ventilation<br>Adverse effects leading to discontinuation<br>Duration of hospitalization                                         |
| Goldman, 2020 <sup>132</sup>         | Peer-reviewed publication<br>NCT04292899 | 402 | United States, Italy, Spain, Gernmany, Hong Kong, Singapore, South Korea, Taiwan | 61.5     | 63.7   | Asthma (12.3%)<br>Diabetes (22.7%)<br>Hypertension (49.9%)           | Inpatient    | Severe (100%) | 30.7                                   | Supplemental oxygen (55.4%)<br>lv (3.3%)<br>High-flow or niv (27.5%) | remdesivir (5 days) (100 mg once daily for 5 days)<br>remdesivir (10 days) (100 mg/day for 10 days)                                                                                              | Mortality<br>Mechanical ventilation<br>Adverse effects leading to discontinuation<br>Duration of hospitalization<br>Time to symptom/clinical improvement |

| Study                                      | Publication status<br>Registration          | n   | Country                                              | Mean age | % Male | Comorbidities                                                                              | Type of care                         | Severity                                   | % Mechanical ventilation (at baseline) | Detailed ventilation (%)                                   | Treatments (dose and duration)                                                                                           | Outcomes                                                                                                                                                                                             |
|--------------------------------------------|---------------------------------------------|-----|------------------------------------------------------|----------|--------|--------------------------------------------------------------------------------------------|--------------------------------------|--------------------------------------------|----------------------------------------|------------------------------------------------------------|--------------------------------------------------------------------------------------------------------------------------|------------------------------------------------------------------------------------------------------------------------------------------------------------------------------------------------------|
| Gonzalez Ochoa, 2021 <sup>133</sup>        | Peer-reviewed publication<br>ISRCTN59048638 | 312 | Mexico                                               | 54.6     | 47.8   | Copd (18.3%)<br>Cardiovascular disease (19.6%)<br>Diabetes (22.8%)<br>Hypertension (34.3%) | Outpatient                           | NR                                         | 0                                      | Supplemental oxygen, niv, or iv (0.0%)                     | sulodexide (500 RLU twice daily for 3 weeks)<br>placebo                                                                  | Mortality<br>Mechanical ventilation<br>Admission to hospital<br>Adverse effects leading to discontinuation<br>Venous thromboembolism<br>Clinically important bleeding<br>Duration of hospitalization |
| Gonzalez, 2021 <sup>134</sup>              | Pre-print<br>NCT04391127                    | 106 | Mexico                                               | 53       | 62.3   | Copd (6.6%)<br>Diabetes (34.0%)<br>Hypertension (32.1%)                                    | Inpatient                            | Mild/Moderate (100.0%)                     | 0                                      | High oxygen volume (0.0%)<br>Mechanical ventilation (0.0%) | ivermectin (12 mg to 18 mg single dose based on weight)<br>hydroxychloroquine (200 mg twice daily for 5 days)<br>placebo | Mortality<br>Duration of hospitalization                                                                                                                                                             |
| Gordon_1, 2021<br>REMAP-CAP <sup>135</sup> | Peer-reviewed publication<br>NCT02735707    | 826 | United Kingdom, Netherlands, Australia, New Zealand, | 61.4     | 72.6   | Respiratory condition (23.9%)<br>Severe cardiovascular disease                             | Inpatient<br>Intensive care (100.0%) | Severe (100%)<br>Severe: Critical (100.0%) | 99.6                                   | High-flow (28.8%)<br>Niv (41.5%)<br>Iv (29.4%)             | tocilizumab (8mg/kg, for a maximum of 800 mg, in 24 hours)<br>sarilumab (400 mg                                          | Mortality<br>Mechanical ventilation<br>Duration of hospitalization                                                                                                                                   |

| Study                                        | Publication status<br>Registration                              | n   | Country                                       | Mean age | % Male | Comorbidities                                                                                                                | Type of care | Severity                                   | % Mechanical ventilation<br>(at baseline) | Detailed ventilation (%)                               | Treatments (dose and duration)                                                               | Outcomes                                                                                                         |
|----------------------------------------------|-----------------------------------------------------------------|-----|-----------------------------------------------|----------|--------|------------------------------------------------------------------------------------------------------------------------------|--------------|--------------------------------------------|-------------------------------------------|--------------------------------------------------------|----------------------------------------------------------------------------------------------|------------------------------------------------------------------------------------------------------------------|
|                                              |                                                                 |     | Ireland, Saudia Arabia                        |          |        | (10.2%)<br>Diabetes<br>(35.4%)                                                                                               |              |                                            |                                           |                                                        | single dose)<br>standard care                                                                | ICU length of stay<br>Ventilator-free days                                                                       |
| Gordon_2, 2021<br>REMAP-CAP <sup>136</sup>   | Peer-reviewed publication<br>NCT02735707                        | 953 | NR                                            | NR       | NR     | NR                                                                                                                           | Inpatient    | Severe (100%)<br>Severe: Critical (100.0%) | NR                                        | NR                                                     | tocilizumab (8mg/kg, for a maximum of 800 mg, in 24 hours)<br>sarilumab (400 mg single dose) | Mortality                                                                                                        |
| Gottlieb_2, 2021 <sup>137 138</sup>          | Data from authors<br>NCT04501952, EudraCT Number 2020-003510-12 | 584 | United States, Spain, Denmark, United Kingdom | 50.5     | 52.1   | Chronic lung disease (24.0%)<br>Cardiovascular or cerebrovascular disease (7.8%)<br>Diabetes (61.6%)<br>Hypertension (47.7%) | Outpatient   | NR                                         | 0                                         | Unspecified ventilation (0.0%)                         | remdesivir (200 mg on day 1 followed by 100 mg on days 2 and 3)<br>placebo                   | Mortality<br>Admission to hospital<br>Adverse effects leading to discontinuation                                 |
| Guimarães, 2021<br>STOP-COVID <sup>139</sup> | Peer-reviewed publication<br>NCT04469114                        | 289 | Brazil                                        | 56       | 65     | Diabetes (23.5%)<br>Hypertension (50.2%)                                                                                     | Inpatient    | NR                                         | 0                                         | Supplemental oxygen (75.4%)<br>Niv, iv, or ecmo (0.0%) | tofacitinib (10 mg twice daily for up to 14 days or until hospital discharge)<br>placebo     | Mortality<br>Mechanical ventilation<br>Adverse effects leading to discontinuation<br>Duration of hospitalization |

| Study                                     | Publication status<br>Registration       | n   | Country         | Mean age | % Male | Comorbidities                                                                                                | Type of care | Severity                                                           | % Mechanical ventilation (at baseline) | Detailed ventilation (%)                               | Treatments (dose and duration)                                                                                                                                                                                        | Outcomes                                                                                                                                                 |
|-------------------------------------------|------------------------------------------|-----|-----------------|----------|--------|--------------------------------------------------------------------------------------------------------------|--------------|--------------------------------------------------------------------|----------------------------------------|--------------------------------------------------------|-----------------------------------------------------------------------------------------------------------------------------------------------------------------------------------------------------------------------|----------------------------------------------------------------------------------------------------------------------------------------------------------|
|                                           |                                          |     |                 |          |        |                                                                                                              |              |                                                                    |                                        |                                                        |                                                                                                                                                                                                                       | on ICU length of stay<br>Duration of ventilation                                                                                                         |
| Gunst, 2021<br>CamoCO-19 <sup>140</sup>   | Peer-reviewed publication<br>NCT04321096 | 208 | Denmark, Sweden | 61       | 60     | Asthma (13.0%)<br>Copd (10.0%)<br>Coronary heart disease (19.0%)<br>Diabetes (17.0%)<br>Hypertension (34.0%) | Inpatient    | Mild/Moderate (33.0%)<br>Severe (67.0%)<br>Severe: Critical (8.0%) | 6.6                                    | Supplemental oxygen (59.1%)<br>High-flow or niv (6.6%) | camostat mesilate (200 mg given three times daily for 5 days)<br>placebo                                                                                                                                              | Mortality<br>Mechanical ventilation<br>Adverse effects leading to discontinuation<br>Duration of hospitalization<br>Time to symptom/clinical improvement |
| Gutiérrez-Castrellón, 2021 <sup>141</sup> | Pre-print<br>NCT04517422                 | 300 | Mexico          | 36.5     | 46.3   | Asthma (0.0%)<br>Copd (0.0%)<br>Cystic fibrosis (0.0%)<br>Diabetes (10.3%)<br>Hypertension (19.7%)           | Outpatient   | NR                                                                 | NR                                     | NR                                                     | Lactiplantibacillus plantarum KABP021 (≥2x10 <sup>9</sup> colony-forming units once daily for 30 days)<br>Lactiplantibacillus plantarum KABP022 ()<br>Lactiplantibacillus plantarum KABP023 ()<br>Lactiplantibacillus | Mortality<br>Admission to hospital<br>Adverse effects leading to discontinuation<br>Time to symptom/cli                                                  |

| Study                                                       | Publication status<br>Registration                | n  | Country              | Mean age | % Male | Comorbidities                                                                                              | Type of care | Severity      | % Mechanical ventilation<br>(at baseline) | Detailed ventilation (%)                              | Treatments (dose and duration)                                                                                                                                  | Outcomes                                                                                 |
|-------------------------------------------------------------|---------------------------------------------------|----|----------------------|----------|--------|------------------------------------------------------------------------------------------------------------|--------------|---------------|-------------------------------------------|-------------------------------------------------------|-----------------------------------------------------------------------------------------------------------------------------------------------------------------|------------------------------------------------------------------------------------------|
|                                                             |                                                   |    |                      |          |        |                                                                                                            |              |               |                                           |                                                       | plantarum KABP033 ()<br>placebo                                                                                                                                 | nical<br>improvement                                                                     |
| Guvenmez, 2020 <sup>142</sup>                               | Peer-reviewed publication                         | 24 | Turkey               | 58.8     | 62.5   | NR                                                                                                         | Inpatient    | NR            | 0                                         | Mechanical ventilation (0.0%)                         | lincomycin (600 mg twice daily for 5 days)<br>azithromycin (250 mg/day for 5 days)                                                                              | Viral clearance                                                                          |
| HMO-020-0224_NCT04377750, 2021<br>HMO-020-0224 <sup>1</sup> | Meta-analysis<br>NCT04377750                      | 54 | Israel               | 63.1     | 68.5   | NR                                                                                                         | Inpatient    | Severe (100%) | NR                                        | NR                                                    | tocilizumab (8 mg/kg (up to 800 mg) single dose)<br>placebo                                                                                                     | NR                                                                                       |
| Hakamifard, 2021 <sup>143</sup>                             | Peer-reviewed publication<br>IRCT20180425039414N3 | 73 | Iran                 | 36.5     | 63.9   | End-stage lung disease (0.0%)<br>Cardiovascular disease (9.7%)<br>Diabetes (25.0%)<br>Hypertension (25.0%) | Inpatient    | Severe (100%) | 0                                         | Mechanical ventilation, oxygen therapy at home (0.0%) | vitamin C (1 g daily, 400 IU daily for the duration of hospitalization until hospital discharge or intensive care unit admission) vitamin E ()<br>standard care | Mortality<br>Duration of hospitalization                                                 |
| Hamed, 202 <sup>144</sup>                                   | Peer-reviewed publication                         | 49 | United Arab Emirates | 48.5     | 81.6   | Diabetes (47.0%)<br>Hypertension (30.0%)                                                                   | Inpatient    | Severe (100%) | NR                                        | NR                                                    | methylprednisolone (40 mg twice daily for 7 days)<br>methylprednisolone (40 mg of methylprednisolone twice daily for 7 days)<br>tocilizumab (single 400         | Mortality<br>Mechanical ventilation<br>Duration of hospitalization<br>ICU length of stay |

| Study                                     | Publication status<br>Registration                | n   | Country | Mean age | % Male | Comorbidities                                                                                                    | Type of care | Severity      | % Mechanical ventilation<br>(at baseline) | Detailed ventilation (%) | Treatments (dose and duration)                                                                                       | Outcomes                                 |
|-------------------------------------------|---------------------------------------------------|-----|---------|----------|--------|------------------------------------------------------------------------------------------------------------------|--------------|---------------|-------------------------------------------|--------------------------|----------------------------------------------------------------------------------------------------------------------|------------------------------------------|
|                                           |                                                   |     |         |          |        |                                                                                                                  |              |               |                                           |                          | mg dose of tocilizumab)                                                                                              | Duration of ventilation                  |
| Hamidi-Alamdari, 2021 <sup>18</sup>       | Peer-reviewed publication<br>NCT04370288          | 80  | Iran    | 54.5     | 52.5   | Coronary artery bypass graft (2.5%)<br>Ischemic heart disease (2.5%)<br>Diabetes (10.0%)<br>Hypertension (17.5%) | Inpatient    | Severe (100%) | NR                                        | NR                       | methylene blue (1 mg/kg orally every 8 hours for 2 days, 1 mg/kg orally every 12 hours for 12 days)<br>standard care | Mortality<br>Duration of hospitalization |
| Hasan, 2021 <sup>145</sup>                | Peer-reviewed publication                         | 168 | Iraq    | 56.3     | 72.2   | Asthma (10.1%)<br>Ischemic heart disease (15.8%)<br>Diabetes (29.8%)<br>Hypertension (53.2%)                     | Inpatient    | Severe (100%) | NR                                        | NR                       | melatonin (10 mg once daily for 14 days)<br>standard care                                                            | Mortality                                |
| Hassan, Abdelmaksoud, 2020 <sup>146</sup> | Peer-reviewed publication                         | 105 | Egypt   | NR       | NR     | NR                                                                                                               | Inpatient    | NR            | NR                                        | NR                       | zinc sulfate (220 mg twice daily)<br>standard care                                                                   | Time to viral clearance                  |
| Hassaniazad, 2021 <sup>147</sup>          | Peer-reviewed publication<br>IRCT20200611047735N1 | 40  | Iran    | 48.5     | 55     | NR                                                                                                               | Inpatient    | NR            | NR                                        | NR                       | nano-curcumin (40 mg four times daily for 2 weeks)<br>placebo                                                        | NR                                       |

| Study                                                  | Publication status<br>Registration       | n   | Country       | Mean age | % Male | Comorbidities                                                                                                                                 | Type of care | Severity      | % Mechanical ventilation (at baseline) | Detailed ventilation (%)                                                               | Treatments (dose and duration)                                                                                                                                                                                                             | Outcomes                                                                              |
|--------------------------------------------------------|------------------------------------------|-----|---------------|----------|--------|-----------------------------------------------------------------------------------------------------------------------------------------------|--------------|---------------|----------------------------------------|----------------------------------------------------------------------------------------|--------------------------------------------------------------------------------------------------------------------------------------------------------------------------------------------------------------------------------------------|---------------------------------------------------------------------------------------|
| Hermine, 2020<br>CORIMUNO-TOCI 1 <sup>148</sup>        | Peer-reviewed publication<br>NCT04331808 | 131 | France        | 64       | 67.7   | Asthma (6.2%)<br>Chronic pulmonary disease, not asthma (4.7%)<br>Chronic cardiac disease (31.2%)<br>Diabetes (33.6%)                          | Inpatient    | Severe (100%) | 0                                      | Supplemental oxygen (100.0%)<br>Niv or iv (0.0%)                                       | tocilizumab (8 mg/kg on day 1, and 400 mg on day 3 if oxygen requirement was not decreased by more than 50%)<br>standard care                                                                                                              | Mechanical ventilation                                                                |
| Hermine_toci, 2020<br>CORIMUNO-TOCIDEX <sup>149</sup>  | Pre-print<br>NCT04476979                 | 453 | French Guiana | 63.4     | 67.8   | Asthma (8.4%)<br>Chronic pulmonary disease - not asthma (7.2%)<br>Chronic cardiac disease (15.8%)<br>Diabetes (23.8%)<br>Hypertension (37.1%) | Inpatient    | Severe (100%) | 0                                      | Supplementar y oxygen (100.0%)<br>High-flow, niv, iv (0.0%)                            | corticosteroids (10mg/d 5 days and tapering doses up to 10 days (5mg/d for 5 days and 2.5mg/d for 5 days) tocilizumab (8mg/kg intravenously at day 1 with additional doses 400 mg IV recommended if no clinical response)<br>standard care | Mortality<br>Mechanical ventilation                                                   |
| Hernandez-Cardenas, 2021<br>HYDRA Trial <sup>150</sup> | Pre-print<br>NCT04315896                 | 214 | Mexico        | 49.6     | 75.2   | Cardiovascular disease (0.5%)<br>Diabetes (15.9%)<br>Hypertension (16.8%)                                                                     | Inpatient    | Severe (100%) | 80.4                                   | Supplementar y oxygen by nasal prongs (19.6%)<br>High flow oxygen (4.7%)<br>Mechanical | hydroxychloroquine (400 mg daily for 10 days)<br>placebo                                                                                                                                                                                   | Mortality<br>Adverse effects leading to discontinuati on<br>Duration of hospitalizati |

| Study                                    | Publication status<br>Registration       | n    | Country        | Mean age | % Male | Comorbidities                                                                                                                 | Type of care     | Severity               | % Mechanical ventilation<br>(at baseline) | Detailed ventilation (%)                                 | Treatments (dose and duration)                                | Outcomes                                                                                    |
|------------------------------------------|------------------------------------------|------|----------------|----------|--------|-------------------------------------------------------------------------------------------------------------------------------|------------------|------------------------|-------------------------------------------|----------------------------------------------------------|---------------------------------------------------------------|---------------------------------------------------------------------------------------------|
|                                          |                                          |      |                |          |        |                                                                                                                               |                  |                        |                                           | ventilation (75.7%)                                      |                                                               | on<br>Duration of ventilation<br>Time to symptom/clinical improvement                       |
| Hinks, 2021<br>ATOMIC2 <sup>151</sup>    | Pre-print<br>NCT04381962                 | 295  | United Kingdom | 45.9     | 51.5   | Asthma (18.0%)<br>Chronic pulmonary disease (4.1%)<br>Myocardial infarction (4.1%)<br>Diabetes (8.5%)<br>Hypertension (17.6%) | Inpatient (0.7%) | Mild/Moderate (100.0%) | 0                                         | Unspecified ventilation (0.0%)                           | azithromycin (500 mg once daily for 14 days)<br>standard care | Mortality<br>Mechanical ventilation<br>Admission to hospital<br>Duration of hospitalization |
| Holubovska, 2021 <sup>152</sup>          | Pre-print<br>NCT04682873                 | 0    | Ukraine        | NR       | NR     | NR                                                                                                                            | Inpatient        | Severe (100%)          | 0                                         | Supplemental oxygen (20.6%)<br>Iv or niv (0.0%)          | enisamium (500 mg four times daily for 7 days)<br>placebo     | Time to symptom/clinical improvement                                                        |
| Horby_1, 2020<br>RECOVERY <sup>153</sup> | Peer-reviewed publication<br>NCT04381936 | 6425 | United Kingdom | 66.2     | 63.6   | Chronic lung disease (20.9%)<br>Tuberculosis (0.4%)<br>Heart disease                                                          | Inpatient        | NR                     | 76.1                                      | Supplemental oxygen or niv (60.4%)<br>Iv or ecmo (15.7%) | dexamethasone (6 mg once daily for 10 days)<br>standard care  | Mortality<br>Mechanical ventilation<br>Duration of hospitalization                          |

| Study                                    | Publication status<br>Registration                             | n    | Country        | Mean age | % Male | Comorbidities                                                                                                 | Type of care | Severity | % Mechanical ventilation<br>(at baseline) | Detailed ventilation (%)                                 | Treatments (dose and duration)                                               | Outcomes                                                           |
|------------------------------------------|----------------------------------------------------------------|------|----------------|----------|--------|---------------------------------------------------------------------------------------------------------------|--------------|----------|-------------------------------------------|----------------------------------------------------------|------------------------------------------------------------------------------|--------------------------------------------------------------------|
|                                          |                                                                |      |                |          |        | (27.3%)<br>Diabetes<br>(24.1%)                                                                                |              |          |                                           |                                                          |                                                                              |                                                                    |
| Horby_2, 2020<br>RECOVERY <sup>154</sup> | Peer-reviewed publication<br>NCT04381936                       | 4716 | United Kingdom | 65.3     | 62.2   | Lung disease (22.2%)<br>Tuberculosis (0.3%)<br>Heart disease (25.7%)<br>Diabetes (27.2%)                      | Inpatient    | NR       | 76.4                                      | Supplemental oxygen or niv (59.6%)<br>Iv or ecmo (16.8%) | hydroxychloroquine (400 mg twice daily for 10 days)<br>standard care         | Mortality<br>Mechanical ventilation<br>Duration of hospitalization |
| Horby_3, 2020<br>RECOVERY <sup>155</sup> | Peer-reviewed publication<br>NCT04381936                       | 5040 | United Kingdom | 66.2     | 61     | Chronic lung disease (23.1%)<br>Tuberculosis (0.3%)<br>Heart disease (26.0%)<br>Diabetes (27.5%)              | Inpatient    | NR       | 73.8                                      | Supplementar y oxygen or niv (69.7%)<br>Iv (4.0%)        | lopinavir-ritonavir (400 mg/100 mg twice daily for 10 days)<br>standard care | Mortality<br>Mechanical ventilation<br>Duration of hospitalization |
| Horby_4, 2021<br>RECOVERY <sup>156</sup> | Peer-reviewed publication<br>ISRCTN (50189673),<br>NCT04381936 | 7763 | United Kingdom | 65.3     | 62.1   | Chronic lung disease (24.9%)<br>Tuberculosis (0.2%)<br>Heart disease (26.3%)<br>Prolonged qtc interval (0.0%) | Inpatient    | NR       | 81.9                                      | Supplemental oxygen or niv (76.0%)<br>Iv (5.8%)          | azithromycin (500 mg once daily for 10 days)<br>standard care                | Mortality<br>Mechanical ventilation<br>Duration of hospitalization |

| Study                                    | Publication status<br>Registration          | n     | Country                          | Mean age | % Male | Comorbidities                                                                                    | Type of care | Severity      | % Mechanical ventilation (at baseline) | Detailed ventilation (%)                                              | Treatments (dose and duration)                                                                                                  | Outcomes                                                           |
|------------------------------------------|---------------------------------------------|-------|----------------------------------|----------|--------|--------------------------------------------------------------------------------------------------|--------------|---------------|----------------------------------------|-----------------------------------------------------------------------|---------------------------------------------------------------------------------------------------------------------------------|--------------------------------------------------------------------|
|                                          |                                             |       |                                  |          |        | Diabetes (27.5%)                                                                                 |              |               |                                        |                                                                       |                                                                                                                                 |                                                                    |
| Horby_5, 2021<br>RECOVERY <sup>157</sup> | Peer-reviewed publication<br>NCT04381936    | 4116  | United Kingdom                   | 63.6     | 67.4   | Chronic lung disease (23.2%)<br>Tuberculosis (0.2%)<br>Heart disease (22.6%)<br>Diabetes (28.4%) | Inpatient    | Severe (100%) | 54.6                                   | Supplemental oxygen (45.4%)<br>High-flow or niv (41.0%)<br>lv (13.7%) | tocilizumab (8 mg/kg, for up to a maximum of 800 mg, once)<br>standard care                                                     | Mechanical ventilation<br>Duration of hospitalization              |
| Horby_6, 2021<br>RECOVERY <sup>158</sup> | Pre-print<br>NCT04381936                    | 11340 | Indonesia, Nepal, United Kingdom | 63.4     | 69.7   | Chronic lung disease (21.3%)<br>Tuberculosis (0.3%)<br>Heart disease (21.3%)<br>Diabetes (25.5%) | Inpatient    | NR            | 31.4                                   | lv (4.7%)<br>Niv (26.8%)<br>None/supplementary oxygen (68.6%)         | colchicine (1 mg followed by 500 µg 12 hours later and then 500 µg twice daily for 10 days or until discharge)<br>standard care | Mortality<br>Mechanical ventilation<br>Duration of hospitalization |
| Horby_7, 2021<br>RECOVERY <sup>159</sup> | Pre-print<br>ISRCTN50189673,<br>NCT04381936 | 14892 | United Kingdom, Indonesia, Nepal | 59.2     | 61.8   | Chronic lung disease (19.0%)<br>Tuberculosis (0.3%)<br>Heart disease (10.5%)                     | Inpatient    | NR            | 33                                     | Niv (28.1%)<br>lv (4.9%)                                              | aspirin (150 mg once daily until discharge)<br>standard care                                                                    | Mortality<br>Mechanical ventilation<br>Duration of hospitalization |

| Study                        | Publication status<br>Registration            | n  | Country | Mean age | % Male | Comorbidities                                                             | Type of care | Severity                                | % Mechanical ventilation<br>(at baseline) | Detailed ventilation (%)      | Treatments (dose and duration)                                                                              | Outcomes                                                                                                             |
|------------------------------|-----------------------------------------------|----|---------|----------|--------|---------------------------------------------------------------------------|--------------|-----------------------------------------|-------------------------------------------|-------------------------------|-------------------------------------------------------------------------------------------------------------|----------------------------------------------------------------------------------------------------------------------|
|                              |                                               |    |         |          |        | Diabetes (21.8%)                                                          |              |                                         |                                           |                               |                                                                                                             |                                                                                                                      |
| Hu, 2020 <sup>160</sup>      | Peer-reviewed publication<br>ChiCTR2000030058 | 10 | China   | 54.9     | 30     | Copd (10.0%)<br>Hypertension (60.0%)                                      | Inpatient    | Mild/Moderate (100.0%)                  | 0                                         | Mechanical ventilation (0.0%) | leflunomide (20 mg once daily for 10 days)<br>standard care                                                 | Mortality<br>Viral clearance<br>Time to symptom/clinical improvement<br>Time to viral clearance                      |
| Huang_1, 2020 <sup>161</sup> | Peer-reviewed publication<br>ChiCTR2000029542 | 22 | China   | 44       | 59.1   | Cerebrovascular disease (4.5%)<br>Diabetes (9.1%)<br>Hypertension (18.2%) | Inpatient    | Mild/Moderate (63.6%)<br>Severe (36.4%) | NR                                        | NR                            | chloroquine (500 mg twice daily for 10 days)<br>lopinavir-ritonavir (400 mg/100 mg twice daily for 10 days) | Viral clearance<br>Duration of hospitalization<br>Time to symptom/clinical improvement<br>Time to to viral clearance |

| Study                        | Publication status<br>Registration            | n   | Country | Mean age | % Male | Comorbidities                                                                                                                                 | Type of care | Severity               | % Mechanical ventilation (at baseline) | Detailed ventilation (%) | Treatments (dose and duration)                                                                                                                                                                                                          | Outcomes                                                                                                                                                                     |
|------------------------------|-----------------------------------------------|-----|---------|----------|--------|-----------------------------------------------------------------------------------------------------------------------------------------------|--------------|------------------------|----------------------------------------|--------------------------|-----------------------------------------------------------------------------------------------------------------------------------------------------------------------------------------------------------------------------------------|------------------------------------------------------------------------------------------------------------------------------------------------------------------------------|
| Huang_2, 2020 <sup>162</sup> | Peer-reviewed publication<br>ChiCTR2000029387 | 101 | China   | 42.5     | 45.5   | Severe lung disease (0.0%)<br>Severe heart disease (0.0%)                                                                                     | Inpatient    | NR                     | NR                                     | NR                       | ribavirin (400-600 mg three times daily for 14 days)<br>lopinavir-ritonavir (400 mg/100 mg twice daily for 14 days)<br>lopinavir-ritonavir (400 mg/100 mg twice daily for 14 days) ribavirin (400-600 mg three times daily for 14 days) | Mortality<br>Adverse effects leading to discontinuation<br>Viral clearance<br>Duration of hospitalization<br>Time to symptom/clinical improvement<br>Time to viral clearance |
| Hung, 2020 <sup>163</sup>    | Peer-reviewed publication<br>NCT04276688      | 127 | China   | 51.3     | 53.5   | Tuberculosis (1.6%)<br>Obstructive sleep apnea (1.6%)<br>Coronary artery disease (7.9%)<br>Cerebrovascular disease (1.6%)<br>Diabetes (13.4%) | Inpatient    | Mild/Moderate (100.0%) | NR                                     | NR                       | interferon beta-1b (subcutaneous) (400 mg twice daily for 14 days) ribavirin (1-3 ml every other day for 14 days)<br>standard care                                                                                                      | Mortality<br>Mechanical ventilation<br>Adverse effects leading to discontinuation<br>Duration of hospitalization<br>Time to symptom/clinical improvement                     |

| 75                                                 |                                          |    |         |          |        |                      |              |                        |                                        |                             |                                                                                                                                                                                                                               |                                                                                                                 |
|----------------------------------------------------|------------------------------------------|----|---------|----------|--------|----------------------|--------------|------------------------|----------------------------------------|-----------------------------|-------------------------------------------------------------------------------------------------------------------------------------------------------------------------------------------------------------------------------|-----------------------------------------------------------------------------------------------------------------|
| Study                                              | Publication status<br>Registration       | n  | Country | Mean age | % Male | Comorbidities        | Type of care | Severity               | % Mechanical ventilation (at baseline) | Detailed ventilation (%)    | Treatments (dose and duration)                                                                                                                                                                                                | Outcomes                                                                                                        |
|                                                    |                                          |    |         |          |        | Hypertension (28.4%) |              |                        |                                        |                             |                                                                                                                                                                                                                               | nical improvement<br>Time to viral clearance                                                                    |
| Husain, 2020 <sup>164</sup>                        | Pre-print                                | 64 | NR      | NR       | NR     | NR                   | Inpatient    | NR                     | NR                                     | NR                          | doxycycline (100 mg twice daily for 10 days)<br>mometasone nasal spray (100 µg twice daily for 10 days, then 100 µg twice daily for 4 weeks)<br>prednisolone (8 mg twice daily for 5 days)<br>placebo<br>factory training ( ) | Mortality                                                                                                       |
| ImmCoVA_NC T04412291, 2021<br>ImmCoVA <sup>1</sup> | Meta-analysis<br>NCT04412291             | 49 | Sweden  | NR       | NR     | NR                   | Inpatient    | Severe (100%)          | 0                                      | Iv (0.0%)                   | tocilizumab (8 mg/kg single dose, up to a maximum of 800 mg)<br>standard care                                                                                                                                                 | Mortality                                                                                                       |
| Ivashchenko, 2020 <sup>165</sup>                   | Peer-reviewed publication<br>NCT04434248 | 60 | Russia  | 50.7     | 50     | NR                   | Inpatient    | Mild/Moderate (100.0%) | NR                                     | Supplemental oxygen (25.0%) | favipiravir (600 mg BID) (600 mg twice daily for 14 days)<br>favipiravir (800 mg BID) (800 mg twice daily for 14 days)<br>standard care                                                                                       | Mortality<br>Mechanical ventilation<br>Adverse effects leading to discontinuation<br>Viral clearance<br>Time to |

| Study                            | Publication status<br>Registration       | n   | Country       | Mean age | % Male | Comorbidities                                                                      | Type of care | Severity      | % Mechanical ventilation<br>(at baseline) | Detailed ventilation (%)               | Treatments (dose and duration)                                                                                                                                                                                                                                                                                                                                                                    | Outcomes                                                           |
|----------------------------------|------------------------------------------|-----|---------------|----------|--------|------------------------------------------------------------------------------------|--------------|---------------|-------------------------------------------|----------------------------------------|---------------------------------------------------------------------------------------------------------------------------------------------------------------------------------------------------------------------------------------------------------------------------------------------------------------------------------------------------------------------------------------------------|--------------------------------------------------------------------|
|                                  |                                          |     |               |          |        |                                                                                    |              |               |                                           |                                        |                                                                                                                                                                                                                                                                                                                                                                                                   | symptom/clinical improvement                                       |
| Ivashkin, 2021 <sup>166</sup>    | Peer-reviewed publication<br>NCT04854941 | 202 | Russia        | 64.5     | 46     | Respiratory condition (9.0%)<br>Cardiovascular disease (65.0%)<br>Diabetes (19.5%) | Inpatient    | Severe (100%) | NR                                        | NR                                     | probiotics (Florasan-D containing ~10 <sup>9</sup> colony forming units (CFU) of Lactacaseibacillus rhamnosus PDV 1705, ~10 <sup>9</sup> CFU of Bifidobacterium bifidum PDV 0903, ~10 <sup>9</sup> CFU of Bifidobacterium longum subsp. infantis PDV 1911, and ~10 <sup>9</sup> CFU of Bifidobacterium longum subsp. longum PDV 2301, given three times a day for up to 14 days)<br>standard care | Mortality<br>Mechanical ventilation<br>Duration of hospitalization |
| Jagannathan, 2021 <sup>167</sup> | Peer-reviewed publication<br>NCT04331899 | 120 | United States | 36       | 58.3   | Asthma (3.3%)<br>Heart disease (3.3%)<br>Diabetes (10.0%)<br>Hypertension (11.7%)  | Outpatient   | NR            | 0                                         | Supplemental oxygen, niv, or iv (0.0%) | peginterferon lambda-1a (180 µg single injection)<br>placebo                                                                                                                                                                                                                                                                                                                                      | Admission to hospital<br>Time to symptom/clinical improvement      |

| Study                                       | Publication status<br>Registration                 | n   | Country | Mean age | % Male | Comorbidities                                                                                           | Type of care                        | Severity      | % Mechanical ventilation (at baseline) | Detailed ventilation (%)                                               | Treatments (dose and duration)                                                        | Outcomes                                                                                 |
|---------------------------------------------|----------------------------------------------------|-----|---------|----------|--------|---------------------------------------------------------------------------------------------------------|-------------------------------------|---------------|----------------------------------------|------------------------------------------------------------------------|---------------------------------------------------------------------------------------|------------------------------------------------------------------------------------------|
|                                             |                                                    |     |         |          |        |                                                                                                         |                                     |               |                                        |                                                                        |                                                                                       | Time to viral clearance                                                                  |
| Jamaati, 2021 <sup>168</sup>                | Peer-reviewed publication<br>IRCT20151227025726N17 | 50  | Iran    | 62       | 72     | Pulmonary disease (20.0%)<br>Cardiovascular disease (14.0%)<br>Diabetes (54.0%)<br>Hypertension (50.0%) | Inpatient                           | Severe (100%) | NR                                     | NR                                                                     | dexamethasone (20 mg/day from day 1-5, then 10 mg/day from day 6-10)<br>standard care | Mortality<br>Mechanical ventilation<br>Duration of hospitalization<br>ICU length of stay |
| JamaliMoghadamSiahkali, 2021 <sup>169</sup> | Peer-reviewed publication<br>IRCT20200411047025N1  | 60  | Iran    | 59.3     | 50     | Copd (10.0%)<br>Ischemic heart disease (18.3%)<br>Diabetes (38.3%)<br>Hypertension (41.7%)              | Inpatient                           | NR            | NR                                     | NR                                                                     | vitamin C (1.5 g every six hours for 5 days)<br>standard care                         | Mortality<br>Mechanical ventilation<br>Duration of hospitalization<br>ICU length of stay |
| Jeronimo, 2020<br>Metcovid <sup>170</sup>   | Peer-reviewed publication<br>NCT04343729           | 416 | Brazil  | 55       | 65.3   | Asthma (2.4%)<br>Tuberculosis (2.1%)<br>Copd (0.5%)<br>Heart disease (6.6%)<br>Diabetes (29.1%)         | Inpatient<br>Intensive care (35.4%) | NR            | 81.3                                   | Invasive mechanical ventilation (33.9%)<br>Non-invasive oxygen (47.5%) | methylprednisolone (0.5 mg/kg twice daily for 5 days)<br>placebo                      | Mortality<br>Mechanical ventilation<br>Viral clearance<br>Duration of hospitalization    |

| Study                                                               | Publication status<br>Registration | n   | Country       | Mean age | % Male | Comorbidities                                                                                                                                                                                                             | Type of care | Severity      | % Mechanical ventilation (at baseline) | Detailed ventilation (%) | Treatments (dose and duration)                                                                                                                                       | Outcomes                                                                                                                                                                                              |
|---------------------------------------------------------------------|------------------------------------|-----|---------------|----------|--------|---------------------------------------------------------------------------------------------------------------------------------------------------------------------------------------------------------------------------|--------------|---------------|----------------------------------------|--------------------------|----------------------------------------------------------------------------------------------------------------------------------------------------------------------|-------------------------------------------------------------------------------------------------------------------------------------------------------------------------------------------------------|
|                                                                     |                                    |     |               |          |        | Hypertension (48.4%)                                                                                                                                                                                                      |              |               |                                        |                          |                                                                                                                                                                      |                                                                                                                                                                                                       |
| Johnston, 2021<br>The COVID-19 Early Treatment Study <sup>171</sup> | Published<br>NCT04354428           | 231 | United States | 37       | 43.3   | Pulmonary disease (5.2%)<br>Moderate or severe persistent asthma (0.9%)<br>Chronic obstructive pulmonary disease/emphysema, (1.7%)<br>Cardiovascular disease (0.0%)<br>T2DM (6.5%)<br>T1DM (0.9%)<br>Hypertension (11.7%) | Outpatient   | NR            | NR                                     | NR                       | hydroxychloroquine (200 mg twice daily for 10 days)<br>azithromycin (250 mg once daily for 5 days)<br>hydroxychloroquine (200 mg twice daily for 10 days)<br>placebo | Mortality<br>Admission to hospital<br>Adverse effects leading to discontinuation<br>Viral clearance<br>Duration of hospitalization<br>Time to symptom/clinical improvement<br>Time to viral clearance |
| Kalantari, 2021 <sup>172</sup>                                      | Peer-reviewed publication          | 62  | Iran          | 57.9     | 45.2   | Copd (4.8%)<br>Asthma (6.5%)<br>Chronic cardiac disease)                                                                                                                                                                  | Inpatient    | Severe (100%) | NR                                     | NR                       | lopinavir-ritonavir (400 mg twice daily for 10 days)<br>atazanavir (300 mg once a day for 10 days)                                                                   | Mortality<br>Mechanical ventilation<br>Duration of                                                                                                                                                    |

| Study                                | Publication status<br>Registration       | n    | Country                                                                              | Mean age | % Male | Comorbidities                                                                                                                                                                                                                                           | Type of care | Severity              | % Mechanical ventilation<br>(at baseline) | Detailed ventilation (%)                                                      | Treatments (dose and duration)                                                            | Outcomes                                                                                                                              |
|--------------------------------------|------------------------------------------|------|--------------------------------------------------------------------------------------|----------|--------|---------------------------------------------------------------------------------------------------------------------------------------------------------------------------------------------------------------------------------------------------------|--------------|-----------------------|-------------------------------------------|-------------------------------------------------------------------------------|-------------------------------------------------------------------------------------------|---------------------------------------------------------------------------------------------------------------------------------------|
|                                      |                                          |      |                                                                                      |          |        | (19.4%)<br>Diabetes<br>(32.3%)<br>Hypertension<br>(29.0%)                                                                                                                                                                                               |              |                       |                                           |                                                                               | dolutegravir (100 mg once a day for 10 days)<br>ritonavir (500 mg once a day for 10 days) | hospitalization                                                                                                                       |
| Kalil, 2020<br>ACTT-2 <sup>173</sup> | Peer-reviewed publication<br>NCT04401579 | 1033 | United States, Singapore, South Korea, Mexico, Japan, Spain, United Kingdom, Denmark | 55.4     | 63.1   | Asthma (9.4%)<br>Chronic oxygen requirement (1.6%)<br>Chronic respiratory disease (6.7%)<br>Cardiac valvular disease (2.1%)<br>Congestive heart failure (6.0%)<br>Coronary artery disease (9.8%)<br>T2DM (35.8%)<br>T1DM (1.0%)<br>Hypertension (50.5%) | Inpatient    | Mild/Moderate (64.5%) | 31.7                                      | Supplemental oxygen (54.6%)<br>High-flow or niv (20.9%)<br>lv or ecmo (10.8%) | baricitinib (4 mg daily for 14 days)<br>placebo                                           | Mortality<br>Mechanical ventilation<br>Duration of hospitalization<br>Duration of ventilation<br>Time to symptom/clinical improvement |

| Study                                  | Publication status<br>Registration                | n   | Country                                              | Mean age | % Male | Comorbidities                                                                                                                                                                                                                                                                        | Type of care | Severity               | % Mechanical ventilation (at baseline) | Detailed ventilation (%)                                      | Treatments (dose and duration)                                                                                              | Outcomes                                                                                                                                                                            |
|----------------------------------------|---------------------------------------------------|-----|------------------------------------------------------|----------|--------|--------------------------------------------------------------------------------------------------------------------------------------------------------------------------------------------------------------------------------------------------------------------------------------|--------------|------------------------|----------------------------------------|---------------------------------------------------------------|-----------------------------------------------------------------------------------------------------------------------------|-------------------------------------------------------------------------------------------------------------------------------------------------------------------------------------|
| Kalil_2, 2021<br>ACTT-3 <sup>174</sup> | Peer-reviewed publication<br>NCT04492475          | 969 | Japan, Mexico, Singapore, South Korea, United States | 58.7     | 58.1   | Asthma (12.7%)<br>Chronic respiratory disease (10.9%)<br>Chronic oxygen disease (4.2%)<br>Coronary artery disease (13.2%)<br>Cardiac arrhythmias (9.0%)<br>Cardiac valvular disease (3.1%)<br>Congestive heart failure (7.2%)<br>T2DM (36.7%)<br>T1DM (0.8%)<br>Hypertension (58.3%) | Inpatient    | Severe (100%)          | 7.1                                    | Supplemental oxygen (77.2%)<br>Niv or hfo (7.1%)<br>Iv (0.0%) | interferon beta-1a (44 µg given four times every other day)<br>placebo                                                      | Mortality<br>Mechanical ventilation<br>Adverse effects leading to discontinuation<br>Duration of hospitalization<br>Duration of ventilation<br>Time to symptom/clinical improvement |
| Kasgari, 2020 <sup>175</sup>           | Peer-reviewed publication<br>IRCT20200328046886N1 | 48  | Iran                                                 | 52.5     | 37.5   | Copd (2.1%)<br>Ischaemic heart disease (22.9%)<br>Diabetes (37.5%)                                                                                                                                                                                                                   | Inpatient    | Mild/Moderate (100.0%) | NR                                     | NR                                                            | ribavirin (600 mg twice daily for 14 days)<br>sofosbuvir-daclatasvir (400 mg/60 mg once daily for 14 days)<br>standard care | Mortality<br>Mechanical ventilation<br>Adverse effects leading to discontinuation                                                                                                   |

| Study                         | Publication status<br>Registration                | n   | Country | Mean age | % Male | Comorbidities                                                                            | Type of care      | Severity      | % Mechanical ventilation (at baseline) | Detailed ventilation (%) | Treatments (dose and duration)                                                                                                                                                           | Outcomes                                                                     |
|-------------------------------|---------------------------------------------------|-----|---------|----------|--------|------------------------------------------------------------------------------------------|-------------------|---------------|----------------------------------------|--------------------------|------------------------------------------------------------------------------------------------------------------------------------------------------------------------------------------|------------------------------------------------------------------------------|
|                               |                                                   |     |         |          |        | Hypertension (35.4%)                                                                     |                   |               |                                        |                          |                                                                                                                                                                                          | Duration of hospitalization<br>ICU length of stay<br>Duration of ventilation |
| Kasiri, 2021 <sup>176</sup>   | Peer-reviewed publication<br>IRCT20190804044429N6 | 80  | Iran    | 34.3     | 50.6   | Asthma (1.3%)<br>Diabetes (1.3%)<br>Hypertension (2.6%)                                  | Outpatient        | NR            | NR                                     | NR                       | mometasone nasal spray (two puffs of 100 µg twice daily in each nostril for 4 weeks)<br>placebo<br>factory training ( )                                                                  | Admission to hospital<br>Adverse effects leading to discontinuation          |
| Khamis, 2020 <sup>177</sup>   | Peer-reviewed publication                         | 89  | Oman    | 55       | 58.4   | Lung disease (5.6%)<br>Heart disease (14.6%)<br>Diabetes (44.9%)<br>Hypertension (53.9%) | Inpatient         | Severe (100%) | NR                                     | NR                       | favipiravir (600 mg twice daily for up to 10 days)<br>inhaled nebulised interferon beta-1a (SNG001) (8 MIU twice daily for 5 days)<br>hydroxychloroquine (200 mg twice daily for 8 days) | Mortality<br>Duration of hospitalization                                     |
| Khavkina, 2021 <sup>178</sup> | Peer-reviewed publication                         | 244 | Russia  | NR       | NR     | NR                                                                                       | Inpatient (16.8%) | NR            | NR                                     | NR                       | favipiravir (800 mg twice daily for 10 days)<br>hydroxychloroquine (inpatients)<br>(umifenovir (10 days), intranasal interferon alpha-2b (10 days),                                      | Mortality<br>Time to viral clearance                                         |

| Study                           | Publication status<br>Registration                | n   | Country        | Mean age | % Male | Comorbidities                                                             | Type of care | Severity      | % Mechanical ventilation<br>(at baseline) | Detailed ventilation (%) | Treatments (dose and duration)                                                                                                                                                         | Outcomes                                                                               |
|---------------------------------|---------------------------------------------------|-----|----------------|----------|--------|---------------------------------------------------------------------------|--------------|---------------|-------------------------------------------|--------------------------|----------------------------------------------------------------------------------------------------------------------------------------------------------------------------------------|----------------------------------------------------------------------------------------|
|                                 |                                                   |     |                |          |        |                                                                           |              |               |                                           |                          | hydroxychloroquine (10 days)) intranasal interferon alpha-2b (nebulised) (outpatients) ()<br>umifenovir (outpatients) ()<br>azithromycinvitamins ()                                    |                                                                                        |
| Khodashahi, 2020 <sup>179</sup> | Peer-reviewed publication<br>IRCT20200325046859N2 | 108 | Iran           | 60.6     | 55.6   | Ischemic heart disease (3.0%)<br>Diabetes (12.0%)<br>Hypertension (13.0%) | Inpatient    | Severe (100%) | NR                                        | NR                       | umifenovir (200 mg four times daily for 7 to 14 days)<br>standard care                                                                                                                 | Mortality<br>Adverse effects leading to discontinuation<br>Duration of hospitalization |
| Khoo, 2021 AGILE <sup>180</sup> | Pre-print<br>NCT04746183                          | 18  | United Kingdom | 56       | 27.8   | NR                                                                        | Outpatient   | NR            | NR                                        | NR                       | molnupiravir (300 mg) (300 mg twice daily for 5 days)<br>molnupiravir (600 mg) (600mg twice daily for 5 days)<br>molnupiravir (800 mg) (800mg twice daily for 5 days)<br>standard care | Mortality<br>Adverse effects leading to discontinuation                                |

| Study                                     | Publication status<br>Registration       | n    | Country                                          | Mean age | % Male | Comorbidities                                                                                   | Type of care | Severity | % Mechanical ventilation (at baseline) | Detailed ventilation (%)      | Treatments (dose and duration)                                                                                                                                                                           | Outcomes                                                          |
|-------------------------------------------|------------------------------------------|------|--------------------------------------------------|----------|--------|-------------------------------------------------------------------------------------------------|--------------|----------|----------------------------------------|-------------------------------|----------------------------------------------------------------------------------------------------------------------------------------------------------------------------------------------------------|-------------------------------------------------------------------|
| Kimura, 2020 <sup>181</sup>               | Peer-reviewed publication<br>NCT04347538 | 54   | United States                                    | 38.2     | 53.3   | Chronic lung disease (15.6%)<br>Heart disease (4.4%)<br>Diabetes (6.7%)<br>Hypertension (24.4%) | Outpatient   | NR       | NR                                     | NR                            | irrigation with hypertonic saline (250 ml twice daily)<br>irrigation with hypertonic saline and surfactant (250 ml and 2.5 mg twice daily)<br>standard care                                              | Time to symptom/clinical improvement                              |
| Kishoria, 2020 <sup>182</sup>             | Peer-reviewed publication                | 35   | India                                            | 38.5     | 71.9   | Congestive heart failure (0.0%)<br>Chest angina or heart arrhythmia (0.0%)                      | Inpatient    | NR       | NR                                     | NR                            | ivermectin (12 mg single dose)<br>standard care                                                                                                                                                          | Viral clearance                                                   |
| Klussmann, 2021<br>CARVIN <sup>183</sup>  | Pre-print<br>DRKS00024520                | 90   | Germany                                          | NR       | NR     | Diabetes (0.0%)                                                                                 | Outpatient   | NR       | NR                                     | NR                            | azelastine (0.1%) (one puff per nostril, 3 times a day for 11 days)<br>azelastine (0.02%) (one puff per nostril, 3 times a day for 11 days)<br>placebo (one puff per nostril, 3 times a day for 11 days) | Viral clearance                                                   |
| Kosiborod, 2021<br>DARE-19 <sup>184</sup> | Peer-reviewed publication<br>NCT04350593 | 1250 | Argentina, Brazil, Canada, India, Mexico, United | 61.4     | 57.4   | Copd (4.6%)<br>Atherosclerotic disease (15.9%)<br>Heart failure (7.2%)                          | Inpatient    | NR       | 0                                      | Mechanical ventilation (0.0%) | dapagliflozin (10 mg daily for 30 days)<br>placebo                                                                                                                                                       | Mortality<br>Mechanical ventilation<br>Adverse effects leading to |

| Study                                                                    | Publication status<br>Registration          | n   | Country                   | Mean age | % Male | Comorbidities                                                                                                                                                                                                | Type of care | Severity | % Mechanical ventilation<br>(at baseline) | Detailed ventilation (%) | Treatments (dose and duration)                                | Outcomes                                                                                      |
|--------------------------------------------------------------------------|---------------------------------------------|-----|---------------------------|----------|--------|--------------------------------------------------------------------------------------------------------------------------------------------------------------------------------------------------------------|--------------|----------|-------------------------------------------|--------------------------|---------------------------------------------------------------|-----------------------------------------------------------------------------------------------|
|                                                                          |                                             |     | Kingdom,<br>United States |          |        | Diabetes (50.9%)<br>Hypertension (84.8%)                                                                                                                                                                     |              |          |                                           |                          |                                                               | discontinuati<br>on                                                                           |
| Kosmopoulos, 2021<br>VASCEPA-<br>COVID-19<br>CardioLink-9 <sup>185</sup> | Peer-reviewed<br>publication<br>NCT04412018 | 100 | Canada                    | 43       | 45     | Cerebrovascul ar disease (2.0%)<br>Coronary artery disease (2.0%)<br>Heart failure (1.0%)<br>Strock/ transcient ischemic attack (0.0%)<br>Unstable angina, (0.0%)<br>Diabetes (9.0%)<br>Hypertension (17.0%) | Outpatient   | NR       | NR                                        | NR                       | icosapent ethyl (2g twice daily for 14 days)<br>standard care | Mortality<br>Admission to hospital<br>Adverse effects leading to discontinuati<br>on          |
| Krishnan, 2021 <sup>186</sup>                                            | Data from authors<br>CTRI/2021/06/033938    | 736 | India                     | 38.3     | 62.3   | Chronic obstructive pulmonary disease (0.1%)<br>Diabetes mellitus (4.4%)<br>T2DM (1.1%)<br>Hypertension (6.6%)                                                                                               | Outpatient   | NR       | NR                                        | NR                       | molnupiravir (800 mg twice daily for 5 days)<br>standard care | Mortality<br>Admission to hospital<br>Adverse effects leading to discontinuati<br>on<br>Viral |

| Study                            | Publication status<br>Registration               | n    | Country   | Mean age | % Male | Comorbidities                                                                   | Type of care | Severity                                   | % Mechanical ventilation<br>(at baseline) | Detailed ventilation (%)   | Treatments (dose and duration)                                        | Outcomes                                                                                  |
|----------------------------------|--------------------------------------------------|------|-----------|----------|--------|---------------------------------------------------------------------------------|--------------|--------------------------------------------|-------------------------------------------|----------------------------|-----------------------------------------------------------------------|-------------------------------------------------------------------------------------------|
|                                  |                                                  |      |           |          |        |                                                                                 |              |                                            |                                           |                            |                                                                       | clearance<br>Time to symptom/clinical improvement                                         |
| Krolewiecki, 2021 <sup>187</sup> | Peer-reviewed publication<br>NCT04381884         | 45   | Argentina | 40.9     | 55.6   | Chronic lung disease/asthma (11.1%)<br>Diabetes (15.6%)<br>Hypertension (13.3%) | Inpatient    | NR                                         | NR                                        | Supplemental oxygen (6.7%) | ivermectin (0.6 mg/kg/day for 5 days)<br>standard care                | Mortality<br>Mechanical ventilation<br>Adverse effects leading to discontinuation         |
| Kumar_1, 2021 <sup>188</sup>     | Peer-reviewed publication<br>CTRI/2020/05/024959 | 32   | India     | 49.1     | 86.7   | An active tuberculosis (0.0%)<br>Hypertension (20.0%)                           | Inpatient    | Severe (100%)<br>Severe: Critical (100.0%) | 30                                        | Niv (30.0%)                | itolizumab (0.8 mg/kg in 250 ml weekly as required)<br>standard care  | Mortality<br>Mechanical ventilation<br>Adverse effects leading to discontinuation         |
| Kumar_2, 2021 <sup>186</sup>     | Data from authors                                | 1218 | India     | NR       | NR     | NR                                                                              | Outpatient   | Mild/Moderate (100.0%)                     | NR                                        | NR                         | molnupiravir (800 mg twice daily for maximum 5 days)<br>standard care | Mortality<br>Admission to hospital<br>Adverse effects leading to discontinuation<br>Viral |

| Study                                           | Publication status<br>Registration                  | n   | Country       | Mean age | % Male | Comorbidities                                                                                                              | Type of care | Severity                                | % Mechanical ventilation<br>(at baseline) | Detailed ventilation (%)      | Treatments (dose and duration)                        | Outcomes                                                                                                                               |
|-------------------------------------------------|-----------------------------------------------------|-----|---------------|----------|--------|----------------------------------------------------------------------------------------------------------------------------|--------------|-----------------------------------------|-------------------------------------------|-------------------------------|-------------------------------------------------------|----------------------------------------------------------------------------------------------------------------------------------------|
|                                                 |                                                     |     |               |          |        |                                                                                                                            |              |                                         |                                           |                               |                                                       | clearance<br>Time to symptom/clinical improvement                                                                                      |
| Kumari, 2020 <sup>189</sup>                     | Peer-reviewed publication                           | 150 | Pakistan      | 52.5     | 56.9   | NR                                                                                                                         | Inpatient    | Severe (100%)                           | 0                                         | Mechanical ventilation (0.0%) | vitamin C (50 mg/kg/day) standard care                | Mortality<br>Mechanical ventilation<br>Duration of hospitalization<br>Time to symptom/clinical improvement                             |
| Kyriazopoulou, 2021<br>SAVE-MORE <sup>190</sup> | Pre-print<br>NCT04680949;<br>EudraCT 2020-005828-11 | 606 | Greece, Italy | 61.8     | 57.9   | Copd (4.0%)<br>Chronic heart failure (3.0%)<br>Coronary heart disease (6.9%)<br>Atrial fibrillation (4.7%)<br>T2DM (15.8%) | Inpatient    | Mild/Moderate (18.4%)<br>Severe (81.7%) | 0                                         | Niv or iv (0.0%)              | anakinra (100 mg once daily for 7 to 10 days) placebo | Mortality<br>Mechanical ventilation<br>Adverse effects leading to discontinuation<br>Duration of hospitalization<br>ICU length of stay |

| Study                                                            | Publication status<br>Registration                                                       | n    | Country                                                                                                       | Mean age | % Male | Comorbidities                                                                            | Type of care | Severity               | % Mechanical ventilation (at baseline) | Detailed ventilation (%)                                                                    | Treatments (dose and duration)                                                                                                                                               | Outcomes                                                                                                                                    |
|------------------------------------------------------------------|------------------------------------------------------------------------------------------|------|---------------------------------------------------------------------------------------------------------------|----------|--------|------------------------------------------------------------------------------------------|--------------|------------------------|----------------------------------------|---------------------------------------------------------------------------------------------|------------------------------------------------------------------------------------------------------------------------------------------------------------------------------|---------------------------------------------------------------------------------------------------------------------------------------------|
| Lakkireddy, 2021 <sup>191</sup>                                  | Peer-reviewed publication<br>CTRI/2020/12/030083                                         | 130  | India                                                                                                         | 45       | 74.7   | diabetes or hypertension (39.1%)                                                         | Inpatient    | NR                     | NR                                     | NR                                                                                          | vitamin D (60000 IUs per day for 8 days (for individuals with BMI 18-25) or 10 days (for individuals with BMI > 25))<br>standard care                                        | Mortality<br>Adverse effects leading to discontinuation<br>Duration of hospitalization                                                      |
| Lattmann, 2021 <sup>192</sup>                                    | Pre-print<br>CTRI/2020/10/028423                                                         | 40   | India                                                                                                         | 52.5     | 65     | Asthma (2.5%)<br>Pulmonary embolism (2.5%)<br>Diabetes (17.5%)<br>Hypertension (15.0%)   | Inpatient    | Mild/Moderate (100.0%) | 15                                     | Supplemental oxygen (85.0%)<br>High-flow or niv (15.0%)<br>Iv (0.0%)                        | CCK-A agonist and CCK-B antagonist (PNB001) (100 mg orally three times daily for 14 days)<br>standard care                                                                   | Mortality<br>Mechanical ventilation<br>Adverse effects leading to discontinuation<br>Duration of hospitalization<br>Time to viral clearance |
| Lawler, 2021<br>ATTACC,<br>ACTIV-4a,<br>REMAP-CAP <sup>193</sup> | Peer-reviewed publication<br>NCT02735707,<br>NCT04505774,<br>NCT04359277,<br>NCT04372589 | 2245 | United Kingdom,<br>United States,<br>Canada, Brazil,<br>Mexico, Nepal,<br>Australia,<br>Netherlands,<br>Spain | 58.9     | 58.7   | Chronic respiratory disease (21.8%)<br>Severe cardiovascular disease (10.6%)<br>Diabetes | Inpatient    | Severe (100%)          | 2                                      | Low flow nasal cannula/face mask (66.6%)<br>Hfo (2.4%)<br>Niv (2.0%)<br>Unspecified (16.5%) | therapeutic-dose anticoagulant (therapeutic-dose low molecular weight or unfractionated heparin for the treatment of acute venous thromboembolism for up to 14 days or until | Mortality<br>Venous thromboembolism<br>Clinically important bleeding                                                                        |

| Study                                   | Publication status<br>Registration            | n   | Country       | Mean age | % Male | Comorbidities                                                                                                                                                      | Type of care | Severity                                            | % Mechanical ventilation<br>(at baseline) | Detailed ventilation (%)               | Treatments (dose and duration)                                                                                     | Outcomes                                                                                                                                  |
|-----------------------------------------|-----------------------------------------------|-----|---------------|----------|--------|--------------------------------------------------------------------------------------------------------------------------------------------------------------------|--------------|-----------------------------------------------------|-------------------------------------------|----------------------------------------|--------------------------------------------------------------------------------------------------------------------|-------------------------------------------------------------------------------------------------------------------------------------------|
|                                         |                                               |     |               |          |        | (29.7%)<br>Hypertension<br>(51.9%)                                                                                                                                 |              |                                                     |                                           |                                        | recovery (defined as hospital discharge, or liberation from supplemental oxygen for ≥24 hours))<br>standard care   |                                                                                                                                           |
| Lemos, 2020<br>HESACOVID <sup>194</sup> | Peer-reviewed publication<br>REBEC RBR-949z6v | 20  | Brazil        | 56.5     | 80     | Cardiovascular disease<br>(10.0%)<br>Diabetes<br>(35.0%)<br>Hypertension<br>(35.0%)                                                                                | Inpatient    | Severe<br>(100%)<br>Severe:<br>Critical<br>(100.0%) | 100                                       | Mechanical ventilation<br>(100.0%)     | enoxaparin (1 mg/kg/day to 1 mg/kg twice daily for 14 days based on age and creatinine clearance)<br>standard care | Mortality<br>Venous thromboembolism<br>Clinically important bleeding<br>Duration of hospitalization<br>Ventilator-free days               |
| Lenze, 2020 <sup>195</sup>              | Peer-reviewed publication<br>NCT04342663      | 181 | United States | 46       | 28.3   | Asthma<br>(17.1%)<br>Severe underlying lung disease, eg, chronic obstructive pulmonary disease or required home oxygen,<br>interstitial lung disease,<br>pulmonary | Outpatient   | Mild/Moderate<br>(100.0%)                           | 0                                         | Supplemental oxygen, niv, or iv (0.0%) | fluvoxamine (100 mg three times daily for 15 days)<br>placebo                                                      | Mortality<br>Mechanical ventilation<br>Admission to hospital<br>Adverse effects leading to discontinuation<br>Duration of hospitalization |

| Study                             | Publication status<br>Registration                                                         | n   | Country                                                                                | Mean age | % Male | Comorbidities                                                                                              | Type of care                        | Severity                                  | % Mechanical ventilation (at baseline) | Detailed ventilation (%)                                                                                                                      | Treatments (dose and duration)                                                                                                             | Outcomes                                                                                                   |
|-----------------------------------|--------------------------------------------------------------------------------------------|-----|----------------------------------------------------------------------------------------|----------|--------|------------------------------------------------------------------------------------------------------------|-------------------------------------|-------------------------------------------|----------------------------------------|-----------------------------------------------------------------------------------------------------------------------------------------------|--------------------------------------------------------------------------------------------------------------------------------------------|------------------------------------------------------------------------------------------------------------|
|                                   |                                                                                            |     |                                                                                        |          |        | hypertension (0.0%)<br>Congestive heart failure (0.0%)<br>Diabetes (11.2%)<br>Hypertension (19.7%)         |                                     |                                           |                                        |                                                                                                                                               |                                                                                                                                            | Duration of ventilation                                                                                    |
| Lescure, 2021 <sup>196</sup>      | Peer-reviewed publication<br>NCT04327388; Eudra CT (2020-001162-12), WHO (U1111-1249-6021) | 420 | Argentina, Brazil, Canada, Chile, France, Germany, Israel, Italy, Japan, Russia, Spain | 59       | 62.7   | Copd (4.3%)<br>Asthma (4.1%)<br>Coronary artery disease (5.3%)<br>Diabetes (26.4%)<br>Hypertension (42.5%) | Inpatient<br>Intensive care (35.6%) | Severe (100%)<br>Severe: Critical (38.9%) | 19.5                                   | Nasal cannula (42.1%)<br>Face mask (26.7%)<br>Nonrebreather face mask (10.5%)<br>High-flow (6.2%)<br>Niv (1.7%)<br>Iv (11.5%)<br>Other (1.2%) | sarilumab (400 mg) (400 mg single dose)<br>sarilumab (200 mg) (200 mg single dose)<br>placebo                                              | Mortality<br>Mechanical ventilation<br>Duration of hospitalization<br>Time to symptom/clinical improvement |
| Li, 2020<br>ELACOI <sup>197</sup> | Peer-reviewed publication<br>NCT04252885                                                   | 86  | China                                                                                  | 49.4     | 46.5   | Respiratory condition (0.0%)<br>Cardiovascular disease (2.3%)<br>Diabetes (2.3%)<br>Hypertension (10.5%)   | Inpatient                           | Mild/Moderate (100.0%)                    | 0                                      | Mechanical ventilation (0.0%)                                                                                                                 | lopinavir-ritonavir (200 mg/50 mg twice daily for 7 to 14 days)<br>umifenovir (200 mg three times daily for 7 to 14 days)<br>standard care | Mortality<br>Adverse effects leading to discontinuation<br>Viral clearance<br>Time to to                   |

| Study                     | Publication status<br>Registration            | n  | Country | Mean age | % Male | Comorbidities                                                                                                                           | Type of care | Severity                                | % Mechanical ventilation<br>(at baseline) | Detailed ventilation (%)                                | Treatments (dose and duration)                                                                                                                      | Outcomes                                                                                                                                                                                                  |
|---------------------------|-----------------------------------------------|----|---------|----------|--------|-----------------------------------------------------------------------------------------------------------------------------------------|--------------|-----------------------------------------|-------------------------------------------|---------------------------------------------------------|-----------------------------------------------------------------------------------------------------------------------------------------------------|-----------------------------------------------------------------------------------------------------------------------------------------------------------------------------------------------------------|
|                           |                                               |    |         |          |        |                                                                                                                                         |              |                                         |                                           |                                                         |                                                                                                                                                     | viral clearance                                                                                                                                                                                           |
| Li_2, 2021 <sup>198</sup> | Peer-reviewed publication<br>ChiCTR2000029638 | 96 | China   | 53.5     | 46.8   | Tuberculosis (3.2%)<br>Copd (1.1%)<br>Heart disease (7.5%)<br>Cerebrovascular disease (5.3%)<br>Diabetes (9.6%)<br>Hypertension (19.1%) | Inpatient    | Mild/Moderate (87.2%)<br>Severe (12.8%) | 25.5                                      | Supplemental oxygen (51.1%)<br>High-flow or niv (25.5%) | recombinant super-combinant interferon (nebulised) (12 MIU twice daily for 28 days)<br>interferon alpha (nebulised) (5 MIU twice daily for 28 days) | Mortality<br>Mechanical ventilation<br>Adverse effects leading to discontinuation<br>Viral clearance<br>Duration of hospitalization<br>Time to symptom/clinical improvement<br>Time to to viral clearance |
| Li_3, 2020 <sup>199</sup> | Peer-reviewed publication<br>NCT04273763      | 18 | China   | 52       | 77.8   | Diabetes (11.1%)<br>Hypertension (33.3%)                                                                                                | Inpatient    | Mild/Moderate (100.0%)                  | 0                                         | Mechanical ventilation (0.0%)                           | bromhexine hydrochloride (32 mg three times daily for 14 days)<br>standard care                                                                     | Mortality<br>Mechanical ventilation<br>Adverse effects leading to discontinuati                                                                                                                           |

| Study                     | Publication status<br>Registration                                                       | n  | Country | Mean age | % Male | Comorbidities                                                            | Type of care | Severity               | % Mechanical ventilation<br>(at baseline) | Detailed ventilation (%)                 | Treatments (dose and duration)                                                                                                        | Outcomes                                                                                                                             |
|---------------------------|------------------------------------------------------------------------------------------|----|---------|----------|--------|--------------------------------------------------------------------------|--------------|------------------------|-------------------------------------------|------------------------------------------|---------------------------------------------------------------------------------------------------------------------------------------|--------------------------------------------------------------------------------------------------------------------------------------|
|                           |                                                                                          |    |         |          |        |                                                                          |              |                        |                                           |                                          |                                                                                                                                       | on<br>Time to symptom/clinical improvement<br>Viral clearance<br>Duration of hospitalization<br>Time to symptom/clinical improvement |
| Li_4, 2021 <sup>200</sup> | Peer-reviewed publication<br>ChiCTR2000029898,<br>ChiCTR2000029899,<br>ChiCTR20000-31376 | 23 | China   | 65.7     | 52.9   | Coronary heart disease (5.9%)<br>Diabetes (5.9%)<br>Hypertension (47.1%) | Inpatient    | Severe (100%)          | 100                                       | Supplemental oxygen, niv, or mv (100.0%) | hydroxychloroquine (200 mg twice daily for 5 days)<br>chloroquine (500 mg twice daily for 3 days, then 250 mg twice daily for 2 days) | Viral clearance<br>Duration of hospitalization<br>Time to symptom/clinical improvement                                               |
| Li_4, 2021 <sup>200</sup> | Peer-reviewed publication<br>ChiCTR2000029898,<br>ChiCTR2000029899,                      | 65 | China   | 60.1     | 61.9   | Coronary heart disease (12.7%)<br>Diabetes (23.8%)                       | Inpatient    | Mild/Moderate (100.0%) | NR                                        | NR                                       | hydroxychloroquine (200 mg twice daily for 5 days)<br>chloroquine (500 mg twice daily for 3 days,                                     | Viral clearance<br>Duration of hospitalization<br>Time to                                                                            |

| Study                                     | Publication status<br>Registration                  | n   | Country | Mean age | % Male | Comorbidities                                                                                        | Type of care | Severity      | % Mechanical ventilation (at baseline) | Detailed ventilation (%)                                      | Treatments (dose and duration)                                                                               | Outcomes                                                                                                                                                                                                  |
|-------------------------------------------|-----------------------------------------------------|-----|---------|----------|--------|------------------------------------------------------------------------------------------------------|--------------|---------------|----------------------------------------|---------------------------------------------------------------|--------------------------------------------------------------------------------------------------------------|-----------------------------------------------------------------------------------------------------------------------------------------------------------------------------------------------------------|
|                                           | ChiCTR2000031376                                    |     |         |          |        | Hypertension (38.1%)                                                                                 |              |               |                                        |                                                               | then 250 mg twice daily for 2 days)                                                                          | symptom/clinical improvement                                                                                                                                                                              |
| Liesenborghs, 2021<br>DAWn <sup>201</sup> | Peer-reviewed publication<br>EudraCT 2020-001243-15 | 65  | Belgium | 62.5     | 63.1   | Chronic pulmonary disease (3.1%)<br>Heart failure (4.6%)<br>Diabetes (23.1%)<br>Hypertension (41.5%) | Inpatient    | Severe (100%) | NR                                     | Supplemental oxygen (64.6%)                                   | itraconazole (capsules (with meal)/oral solution (2 hours before or 1 hour after meal) )<br>standard of care | Mortality<br>Mechanical ventilation<br>Adverse effects leading to discontinuation<br>Duration of hospitalization<br>ICU length of stay<br>Duration of ventilation<br>Time to symptom/clinical improvement |
| Lomakin, 2021<br>CORONA <sup>202</sup>    | Peer-reviewed publication<br>NCT04397562            | 206 | Russia  | 58.4     | 52.9   | Cardiac disease (15.5%)                                                                              | Inpatient    | Severe (100%) | 1.5                                    | Supplemental oxygen (59.7%)<br>Hfo or niv (1.5%)<br>Iv (0.0%) | levilimab (324 mg, as two 162 mg injections, given once)<br>placebo                                          | Mortality<br>Mechanical ventilation<br>Duration of hospitalization                                                                                                                                        |

| Study                                           | Publication status<br>Registration                                                                                                                                | n   | Country | Mean age | % Male | Comorbidities                                                                                                                                             | Type of care | Severity               | % Mechanical ventilation (at baseline) | Detailed ventilation (%)                                              | Treatments (dose and duration)                                                                                                                                       | Outcomes                                                                                                                      |
|-------------------------------------------------|-------------------------------------------------------------------------------------------------------------------------------------------------------------------|-----|---------|----------|--------|-----------------------------------------------------------------------------------------------------------------------------------------------------------|--------------|------------------------|----------------------------------------|-----------------------------------------------------------------------|----------------------------------------------------------------------------------------------------------------------------------------------------------------------|-------------------------------------------------------------------------------------------------------------------------------|
| Lopes_1, 2021<br>BRACE<br>CORONA <sup>203</sup> | Peer-reviewed publication<br>NCT04364893                                                                                                                          | 740 | Brazil  | 55.1     | 59.6   | Asthma (3.9%)<br>Coronary heart disease (4.5%)<br>Heart failure (1.4%)<br>Diabetes (31.9%)<br>Hypertension (100.0%)                                       | Inpatient    | Mild/Moderate (100.0%) | 0                                      | Mechanical ventilation (0.0%)                                         | standard care<br>ACEi/ARB (continuation of ACEi/ARB at the dose previously prescribed during routine care)                                                           | Mortality<br>Mechanical ventilation<br>Duration of hospitalization                                                            |
| Lopes_2, 2021 <sup>204</sup>                    | Peer-reviewed publication<br>RBR-8jyhxxh<br>( <a href="http://www.ensaiosclinicos.gov.br/rg/RBR-8jyhxxh/">http://www.ensaiosclinicos.gov.br/rg/RBR-8jyhxxh/</a> ) | 75  | Brazil  | 54.8     | 45.8   | Respiratory condition (12.5%)<br>Cardiovascular disease (45.8%)<br>Diabetes (38.9%)                                                                       | Inpatient    | Severe (100%)          | 20.8                                   | High-flow (20.8%)                                                     | colchicine (0.25 mg to 0.5 mg three times daily for 5 days, then 0.25 mg to 0.5 mg twice daily for 5 days based on weight and glomerular filtration rate)<br>placebo | Mortality<br>Adverse effects leading to discontinuation<br>Duration of hospitalization<br>ICU length of stay                  |
| Lopes_3, 2021<br>ACTION <sup>205</sup>          | Peer-reviewed publication<br>NCT04394377                                                                                                                          | 615 | Brazil  | 56.6     | 59.8   | Asthma (4.7%)<br>Chronic lung disease (3.1%)<br>Coronary disease (4.5%)<br>Heart failure (2.1%)<br>Vascular disease (0.8%)<br>Valvar heart disease (1.1%) | Inpatient    | Mild/Moderate (93.5%)  | 7                                      | Supplementary oxygen (60.0%)<br>Hfo (7.8%)<br>Iv (6.2%)<br>Niv (0.8%) | therapeutic anticoagulation (20 mg rivaroxaban once daily for 30 days in stable patients)<br>standard care                                                           | Mortality<br>Mechanical ventilation<br>Venous thromboembolism<br>Clinically important bleeding<br>Duration of hospitalization |

| Study                                     | Publication status<br>Registration            | n   | Country  | Mean age | % Male | Comorbidities                                                                                                          | Type of care     | Severity               | % Mechanical ventilation<br>(at baseline) | Detailed ventilation (%)                                    | Treatments (dose and duration)                                                                     | Outcomes                                                                                                                                           |
|-------------------------------------------|-----------------------------------------------|-----|----------|----------|--------|------------------------------------------------------------------------------------------------------------------------|------------------|------------------------|-------------------------------------------|-------------------------------------------------------------|----------------------------------------------------------------------------------------------------|----------------------------------------------------------------------------------------------------------------------------------------------------|
|                                           |                                               |     |          |          |        | History of acute myocardial infarction (2.8%)<br>Cardiac arrhythmia (1.1%)<br>Diabetes (24.4%)<br>Hypertension (49.1%) |                  |                        |                                           |                                                             |                                                                                                    | on<br>Duration of ventilation                                                                                                                      |
| Lopez-Medina, 2021<br>EPIC <sup>206</sup> | Peer-reviewed publication<br>NCT04405843      | 476 | Colombia | 37       | 42     | Respiratory condition (3.0%)<br>Cardiovascular disease (1.8%)<br>Diabetes (5.5%)<br>Hypertension (13.3%)               | Inpatient (1.0%) | Mild/Moderate (100.0%) | 0                                         | Supplemental oxygen (0.5%)<br>High-flow or niv or iv (0.0%) | ivermectin (300 µg/kg/day for 5 days)<br>placebo                                                   | Mortality<br>Mechanical ventilation<br>Admission to hospital<br>Adverse effects leading to discontinuation<br>Time to symptom/clinical improvement |
| Lou, 2020 <sup>207</sup>                  | Peer-reviewed publication<br>ChiCTR2000029544 | 30  | China    | 52.5     | 72.4   | Copd (0.0%)<br>Cardiovascular disease (13.8%)<br>Diabetes                                                              | Inpatient        | NR                     | 0                                         | Mechanical ventilation (0.0%)                               | baloxavir marboxil (80 mg once daily for up to 3 doses on days 1, 4, and 7)<br>favipiravir (600 mg | Mortality<br>Mechanical ventilation<br>Viral clearance                                                                                             |

| Study                                                  | Publication status<br>Registration                                | n    | Country          | Mean age | % Male | Comorbidities                                                                                       | Type of care | Severity      | % Mechanical ventilation (at baseline) | Detailed ventilation (%)    | Treatments (dose and duration)                                      | Outcomes                                                                         |
|--------------------------------------------------------|-------------------------------------------------------------------|------|------------------|----------|--------|-----------------------------------------------------------------------------------------------------|--------------|---------------|----------------------------------------|-----------------------------|---------------------------------------------------------------------|----------------------------------------------------------------------------------|
|                                                        |                                                                   |      |                  |          |        | (6.9%)<br>Hypertension (20.7%)                                                                      |              |               |                                        |                             | three times daily for 14 days)<br>standard care                     | Time to symptom/clinical improvement<br>Time to viral clearance                  |
| Lyngbakken, 2020<br>NO COVID-19 <sup>208</sup>         | Published<br>NCT04316377                                          | 53   | Norway           | 62       | 66     | Copd or asthma (26.4%)<br>Coronary heart disease (9.4%)<br>Diabetes (17.0%)<br>Hypertension (32.1%) | Inpatient    | Severe (100%) | NR                                     | Supplemental oxygen (37.7%) | hydroxychloroquine (400 mg twice daily for 7 days)<br>standard care | Mortality<br>Mechanical ventilation<br>Duration of hospitalization               |
| MOVE-OUT (MK4482-002), 2021<br>MOVE-OUT <sup>209</sup> | Data from authors<br>NCT04575597                                  | 1411 | Multicontinental | 43       | 49     | NR                                                                                                  | Outpatient   | NR            | NR                                     | NR                          | molnupiravir (800 mg twice daily for 5 days)<br>placebo             | Mortality<br>Admission to hospital<br>Adverse effects leading to discontinuation |
| Maghbooli, 2021 <sup>210</sup>                         | Peer-reviewed publication<br>IRCT20200401046909N1,<br>NCT04386850 | 106  | Iran             | 49.5     | 60.4   | Chronic disorders lung (10.4%)<br>Cardiac disorder                                                  | Inpatient    | NR            | NR                                     | NR                          | calcifediol (25 µg once daily)<br>placebo                           | Mortality<br>Mechanical ventilation<br>Duration of hospitalization               |

| Study                           | Publication status<br>Registration          | n   | Country    | Mean age | % Male | Comorbidities                                                                                            | Type of care | Severity                      | % Mechanical ventilation<br>(at baseline) | Detailed ventilation (%)                                                      | Treatments (dose and duration)                                                          | Outcomes                                                                                                                        |
|---------------------------------|---------------------------------------------|-----|------------|----------|--------|----------------------------------------------------------------------------------------------------------|--------------|-------------------------------|-------------------------------------------|-------------------------------------------------------------------------------|-----------------------------------------------------------------------------------------|---------------------------------------------------------------------------------------------------------------------------------|
|                                 |                                             |     |            |          |        | (12.3%)<br>Diabetes<br>(23.6%)<br>Hypertension<br>(31.1%)                                                |              |                               |                                           |                                                                               |                                                                                         | on<br>ICU length of<br>stay                                                                                                     |
| Mahajan,<br>2021 <sup>211</sup> | Peer-reviewed<br>publication                | 82  | India      | 57.7     | 68.6   | Asthma (1.4%)<br>Coronary<br>artery disease<br>(12.8%)<br>Diabetes<br>(60.0%)<br>Hypertension<br>(45.7%) | Inpatient    | Severe<br>(100%)              | 24.3                                      | Supplemental<br>oxygen<br>(75.7%)<br>High-flow or<br>niv (24.3%)<br>lv (0.0%) | remdesivir (100 mg<br>daily for 5 days)<br>standard care                                | Mortality<br>Mechanical<br>ventilation<br>Adverse<br>effects<br>leading to<br>discontinuati<br>on<br>Duration of<br>ventilation |
| Mahmud,<br>2021 <sup>212</sup>  | Peer-reviewed<br>publication<br>NCT04523831 | 400 | Bangladesh | 39.5     | 58.8   | Asthma (5.2%)<br>Diabetes<br>(13.2%)<br>Hypertension<br>(14.2%)                                          | NR           | Mild/Mo<br>derate<br>(100.0%) | 0                                         | Supplemental<br>oxygen (0.0%)<br>Niv (0.0%)<br>lv (0.0%)                      | doxycycline (100 mg<br>twice daily for 5 days)<br>ivermectin (12 mg<br>once)<br>placebo | Mortality<br>Adverse<br>effects<br>leading to<br>discontinuati<br>on<br>Time to<br>symptom/cli<br>nical<br>improvement          |

| Study                         | Publication status<br>Registration               | n   | Country | Mean age | % Male | Comorbidities                                                   | Type of care | Severity              | % Mechanical ventilation (at baseline) | Detailed ventilation (%)                           | Treatments (dose and duration)                                                                  | Outcomes                                                                                                                                                       |
|-------------------------------|--------------------------------------------------|-----|---------|----------|--------|-----------------------------------------------------------------|--------------|-----------------------|----------------------------------------|----------------------------------------------------|-------------------------------------------------------------------------------------------------|----------------------------------------------------------------------------------------------------------------------------------------------------------------|
| Majeed, 2021 <sup>213</sup>   | Peer-reviewed publication<br>CTRI/2020/09/027841 | 100 | India   | 38.2     | 71     | NR                                                              | Inpatient    | NR                    | 0                                      | Supplemental oxygen, mechanical ventilation (0.0%) | ImmuActive (once daily for 28 days or until hospital discharge)<br>placebo                      | Mortality<br>Mechanical ventilation<br>Adverse effects leading to discontinuation<br>Viral clearance<br>Duration of hospitalization<br>Time to viral clearance |
| Malonado, 2020 <sup>214</sup> | Peer-reviewed publication                        | 54  | Mexico  | 57.5     | 55.4   | Diabetes (50.0%)<br>Hypertension (39.5%)                        | Inpatient    | Mild/Moderate (67.9%) | NR                                     | NR                                                 | pentoxifylline (400 mg three times daily until discharge)<br>standard care                      | Mortality<br>Mechanical ventilation<br>Adverse effects leading to discontinuation<br>Duration of hospitalization                                               |
| Mansour, 2020 <sup>215</sup>  | Pre-print<br>U1111-1250-1843                     | 30  | Brazil  | 51.6     | 53.3   | Asthma (3.3%)<br>Ischemic myocardial disease (0.0%)<br>Diabetes | Inpatient    | Severe (100%)         | NR                                     | NR                                                 | icatibant (30 mg three times daily for 4 days)<br>C1 esterase/kallikrein Inhibitor (20 IU/kg on | Mortality<br>Duration of hospitalization                                                                                                                       |

| Study                                       | Publication status<br>Registration       | n    | Country                                                                                                      | Mean age | % Male | Comorbidities                                                              | Type of care | Severity      | % Mechanical ventilation (at baseline) | Detailed ventilation (%)                                                    | Treatments (dose and duration)                                                                                                          | Outcomes                                                                                                                                                                                               |
|---------------------------------------------|------------------------------------------|------|--------------------------------------------------------------------------------------------------------------|----------|--------|----------------------------------------------------------------------------|--------------|---------------|----------------------------------------|-----------------------------------------------------------------------------|-----------------------------------------------------------------------------------------------------------------------------------------|--------------------------------------------------------------------------------------------------------------------------------------------------------------------------------------------------------|
|                                             |                                          |      |                                                                                                              |          |        | (46.7%)<br>Hypertension (50.0%)                                            |              |               |                                        |                                                                             | day 1 and 4) standard care                                                                                                              | ICU length of stay                                                                                                                                                                                     |
| Marconi, 2021<br>COV-BARRIER <sup>216</sup> | Peer-reviewed publication<br>NCT04421027 | 1525 | Argentina, Brazil, Germany, India, Italy, Japan, Korea, Mexico, Russia, Spain, United Kingdom, United States | 57.6     | 63.1   | Chronic respiratory disease (4.6%)<br>T1DM (30.0%)<br>Hypertension (47.9%) | Inpatient    | Severe (100%) | 24.4                                   | Supplemental oxygen (63.4%)<br>High-flow or niv oxygen (24.4%)<br>lv (0.0%) | baricitinib (4 mg daily for 14 days or until discharge (patients with eGFR≥30 to <60 mL/min/1.73 m <sup>2</sup> received 2 mg)) placebo | Mortality<br>Mechanical ventilation<br>Adverse effects leading to discontinuation<br>Duration of hospitalization<br>ICU length of stay<br>Ventilator-free days<br>Time to symptom/clinical improvement |
| Marcos, 2021<br>BEMICOP <sup>217</sup>      | Peer-reviewed publication<br>NCT04604327 | 66   | Spain                                                                                                        | 62.6     | 63.1   | Chronic pulmonary disease (16.9%)<br>Cardiopathy (6.2%)<br>Diabetes (7.7%) | Inpatient    | NR            | NR                                     | Oxygen requirement (58.5%)                                                  | therapeutic-dose bemiparin (115 IU/Kg once daily, adjusted to body weight (7,500 IU for patients between 50-70 Kg) prophylactic-dose    | Mortality<br>Viral clearance<br>Venous thromboembolism<br>Clinically                                                                                                                                   |

| Study                         | Publication status<br>Registration | n   | Country       | Mean age | % Male | Comorbidities                                                                           | Type of care                         | Severity                                           | % Mechanical ventilation<br>(at baseline) | Detailed ventilation (%)        | Treatments (dose and duration)                                                                                                                                    | Outcomes                                                                                                                                                        |
|-------------------------------|------------------------------------|-----|---------------|----------|--------|-----------------------------------------------------------------------------------------|--------------------------------------|----------------------------------------------------|-------------------------------------------|---------------------------------|-------------------------------------------------------------------------------------------------------------------------------------------------------------------|-----------------------------------------------------------------------------------------------------------------------------------------------------------------|
|                               |                                    |     |               |          |        | Hypertension (33.9%)                                                                    |                                      |                                                    |                                           |                                 | bemiparin (3,500 IU once daily for 10 days)                                                                                                                       | important bleeding                                                                                                                                              |
| Maskin, 2021 <sup>218</sup>   | Pre-print<br>NCT04395105           | 100 | Argentina     | 61.8     | 70.4   | NR                                                                                      | Inpatient<br>Intensive care (100.0%) | Severe (100%)<br>Severe: Critical (100.0%)         | 100                                       | Mechanical ventilation (100.0%) | dexamethasone (high-dose) (16 mg once daily for 5 days, followed by 8 mg once daily for another 5 days)<br>dexamethasone (low-dose) (6 mg once daily for 10 days) | Mortality<br>Adverse effects leading to discontinuation<br>Duration of hospitalization<br>ICU length of stay<br>Ventilator-free days<br>Duration of ventilation |
| McCreary, 2021 <sup>219</sup> | Pre-print<br>NCT04400890           | 105 | United States | 56       | 41     | NR                                                                                      | Outpatient                           | NR                                                 | NR                                        | NR                              | resveratrol (1000 mg four times daily for at least 7 days, up to 15 days)<br>placebo                                                                              | Mortality<br>Mechanical ventilation<br>Admission to hospital                                                                                                    |
| Mehboob, 2020 <sup>220</sup>  | Pre-print<br>NCT04468646           | 18  | Pakistan      | 53.5     | 61.1   | Respiratory condition (0.0%)<br>Ischemic heart disease (33.3%)<br>Carotid artery bypass | Inpatient                            | Mild/Moderate (27.8%)<br>Severe (72.2%)<br>Severe: | NR                                        | NR                              | aprepitant (80 mg once daily for 3-5 days)<br>standard care                                                                                                       | Mortality                                                                                                                                                       |

| Study                                 | Publication status<br>Registration       | n  | Country       | Mean age | % Male | Comorbidities                                                 | Type of care | Severity                                  | % Mechanical ventilation<br>(at baseline) | Detailed ventilation (%) | Treatments (dose and duration)                                                                                                               | Outcomes                                                                                                                                           |
|---------------------------------------|------------------------------------------|----|---------------|----------|--------|---------------------------------------------------------------|--------------|-------------------------------------------|-------------------------------------------|--------------------------|----------------------------------------------------------------------------------------------------------------------------------------------|----------------------------------------------------------------------------------------------------------------------------------------------------|
|                                       |                                          |    |               |          |        | grafting (5.6%)<br>Diabetes (38.9%)<br>Hypertension (50.0%)   |              | Critical (38.9%)                          |                                           |                          |                                                                                                                                              |                                                                                                                                                    |
| Migled, 2020 <sup>221</sup>           | Peer-reviewed publication                | 60 | Ecuador       | 33.3     | 53.3   | Respiratory disease (10.0%)<br>Cardiovascular disease (58.3%) | Outpatient   | NR                                        | NR                                        | NR                       | metisoprinol (children: 50 mg/kg/day divided into 4 daily doses for 4 days then every 8 hours until completing the 14 days)<br>standard care | Mechanical ventilation<br>Admission to hospital<br>Viral clearance                                                                                 |
| Miller, 2020<br>CARDEA <sup>222</sup> | Peer-reviewed publication<br>NCT04345614 | 30 | United States | 59.3     | 46.7   | Diabetes (40.0%)<br>Hypertension (46.7%)                      | Inpatient    | Severe (100%)<br>Severe: Critical (13.3%) | 13.3                                      | High-flow (13.3%)        | Auxora (1.6 mg/kg given in 4 hours for 3 days)<br>standard care                                                                              | Mortality<br>Mechanical ventilation<br>Time to symptom/clinical improvement<br>Duration of hospitalization<br>Time to symptom/clinical improvement |

| Study                                                                                              | Publication status<br>Registration | n    | Country       | Mean age | % Male | Comorbidities                                                                                             | Type of care | Severity                                | % Mechanical ventilation<br>(at baseline) | Detailed ventilation (%)                                                                   | Treatments (dose and duration)                                                | Outcomes                                                                                                                                           |
|----------------------------------------------------------------------------------------------------|------------------------------------|------|---------------|----------|--------|-----------------------------------------------------------------------------------------------------------|--------------|-----------------------------------------|-------------------------------------------|--------------------------------------------------------------------------------------------|-------------------------------------------------------------------------------|----------------------------------------------------------------------------------------------------------------------------------------------------|
| Miller, 2021 <sup>223</sup>                                                                        | Pre-print                          | 40   | United States | 54.1     | 57.5   | NR                                                                                                        | Inpatient    | Mild/Moderate (12.5%)<br>Severe (87.5%) | 32.5                                      | Supplemental oxygen (55.0%)<br>High flow oxygen/niv (32.5%)<br>Invasive ventilation (0.0%) | mupadolimab (1 mg/kg) (1 mg/kg)<br>mupadolimab (2 mg/kg) (2 mg/kg)<br>placebo | Duration of hospitalization<br>Time to symptom/clinical improvement<br>Mortality<br>Mechanical ventilation<br>Time to symptom/clinical improvement |
| Mobarak, 2021<br>Daclatasvir and Sofosbuvir for COVID-19 in hospital Emergency Room <sup>224</sup> | Pre-print<br>IRCT20200624047908N1  | 1083 | Iran          | 58       | 54     | Asthma (4.8%)<br>COPD (2.1%)<br>Ischemic heart disease (9.1%)<br>Diabetes (27.6%)<br>Hypertension (34.0%) | Inpatient    | Mild/Moderate (100.0%)                  | NR                                        | NR                                                                                         | sofosbuvir-daclatasvir (400 mg/60mg once daily for 10 days)<br>placebo        | Mortality<br>Mechanical ventilation<br>Adverse effects leading to discontinuation<br>Duration of hospitalization                                   |

| Study                                   | Publication status<br>Registration | n   | Country | Mean age | % Male | Comorbidities                                                                                                                                                                                    | Type of care                         | Severity               | % Mechanical ventilation<br>(at baseline) | Detailed ventilation (%)                                    | Treatments (dose and duration)                                                                                                                                                                                                                                                                                                           | Outcomes                                                                                                                                                  |
|-----------------------------------------|------------------------------------|-----|---------|----------|--------|--------------------------------------------------------------------------------------------------------------------------------------------------------------------------------------------------|--------------------------------------|------------------------|-------------------------------------------|-------------------------------------------------------------|------------------------------------------------------------------------------------------------------------------------------------------------------------------------------------------------------------------------------------------------------------------------------------------------------------------------------------------|-----------------------------------------------------------------------------------------------------------------------------------------------------------|
| Mohan, 2021<br>RIVET-COV <sup>225</sup> | Pre-print<br>CTRI/2020/06/026001   | 157 | India   | 35.3     | 88.8   | Post tuberculosis sequelae (3.2%)<br>Coronary artery disease (0.8%)<br>Myocardial infarction (0.0%)<br>Prolonged corrected qt interval >450 ms (0.0%)<br>Diabetes (8.8%)<br>Hypertension (11.2%) | Inpatient                            | Mild/Moderate (100.0%) | 0                                         | Supplemental oxygen (8.0%)<br>Mechanical ventilation (0.0%) | ivermectin (12 mg) (200 µg/kg up to 12 mg single dose)<br>ivermectin (24 mg) (400 µg/kg up to 24 mg as a single dose)<br>placebo                                                                                                                                                                                                         | Mortality<br>Mechanical ventilation<br>Viral clearance<br>Time to symptom/clinical improvement                                                            |
| Moni, 2021 <sup>226</sup>               | Pre-print<br>ISRCTN16806663        | 29  | India   | 59.1     | 72     | Copd (12.0%)<br>Congestive heart failure (24.0%)<br>Coronary artery disease (16.0%)<br>Diabetes (56.0%)<br>Hypertension (44.0%)                                                                  | Inpatient<br>Intensive care (100.0%) | Mild/Moderate (100.0%) | 0                                         | Iv (0.0%)                                                   | nitric oxide (inhaled)<br>nitric oxide delivered through a tight fitting face mask and the V60 respiratory assist system in pulses for 30 minutes for three days, every 12 hours. This dose was administered in a crescendo-decrescendo fashion as follows:- 10 ppm, 0-5 minutes, 20 ppm, 5-7 minutes, 30 ppm, 7-9 minutes, 50 ppm, 9-11 | Mortality<br>Mechanical ventilation<br>Adverse effects leading to discontinuation<br>Viral clearance<br>Duration of hospitalization<br>ICU length of stay |

| Study                        | Publication status<br>Registration                        | n   | Country        | Mean age | % Male | Comorbidities                                                                                                | Type of care | Severity      | % Mechanical ventilation<br>(at baseline) | Detailed ventilation (%)                                            | Treatments (dose and duration)                                                                            | Outcomes                                                                                                                       |
|------------------------------|-----------------------------------------------------------|-----|----------------|----------|--------|--------------------------------------------------------------------------------------------------------------|--------------|---------------|-------------------------------------------|---------------------------------------------------------------------|-----------------------------------------------------------------------------------------------------------|--------------------------------------------------------------------------------------------------------------------------------|
|                              |                                                           |     |                |          |        |                                                                                                              |              |               |                                           |                                                                     | minutes, 80 ppm, 11-23 minutes, 80 ppm-0 ppm, 23-30 minutes, decreased at 10 ppm/minute) standard care    | Duration of ventilation<br>Time to symptom/clinical improvement<br>Time to viral clearance                                     |
| Monk, 2020 <sup>227</sup>    | Peer-reviewed publication<br>2020-001023-14 & NCT04385095 | 101 | United Kingdom | 57.1     | 59.2   | Chronic lung condition (23.5%)<br>Cardiovascular disease (13.3%)<br>Diabetes (12.2%)<br>Hypertension (29.6%) | Inpatient    | Severe (100%) | 2                                         | Supplemental oxygen (65.3%)<br>High-flow or niv (2.0%)<br>Iv (0.0%) | inhaled nebulised interferon beta-1a (SNG001) (6 MIU once daily for up to 14 days) placebo                | Mortality<br>Adverse effects leading to discontinuation<br>Duration of hospitalization<br>Time to symptom/clinical improvement |
| Moreira, 2021 <sup>228</sup> | Peer-reviewed publication                                 | 39  | Brazil         | 41.1     | 35.9   | Cardiovascular disease (12.8%)<br>Diabetes (10.3%)<br>Hypertension (17.9%)                                   | Outpatient   | NR            | 0                                         | Unspecified ventilation (0.0%)                                      | dexamethasone (6 mg for 3 days) foralumab (50 µg for 10 days) foralumab (50 µg for 10 days) standard care | NR                                                                                                                             |

| Study                                           | Publication status<br>Registration           | n    | Country                             | Mean age | % Male | Comorbidities                                                                                                                   | Type of care                     | Severity                                   | % Mechanical ventilation (at baseline) | Detailed ventilation (%)                                                       | Treatments (dose and duration)                                                                               | Outcomes                                                                                      |
|-------------------------------------------------|----------------------------------------------|------|-------------------------------------|----------|--------|---------------------------------------------------------------------------------------------------------------------------------|----------------------------------|--------------------------------------------|----------------------------------------|--------------------------------------------------------------------------------|--------------------------------------------------------------------------------------------------------------|-----------------------------------------------------------------------------------------------|
| Munch_1, 2021<br>COVID STEROID <sup>229</sup>   | Peer-reviewed publication<br>NCT04348305     | 30   | Denmark                             | 61       | 80     | Chronic pulmonary disease (16.7%)<br>Ischemic heart failure or heart failure (3.3%)<br>Diabetes (13.3%)<br>Hypertension (26.7%) | Inpatient Intensive care (73.3%) | Severe (100%)<br>Severe: Critical (100.0%) | 50                                     | Iv (36.7%)<br>Niv or cpap (13.3%)<br>Supplemental oxygen (50.0%)               | hydrocortisone (200 mg once daily for 7 days)<br>placebo                                                     | Mortality                                                                                     |
| Munch_2, 2021<br>COVID STEROID 2 <sup>230</sup> | Pre-print<br>NCT04509973, CTRI2020/10/028731 | 1000 | Denmark, India, Sweden, Switzerland | 64.5     | 68.9   | Copd (11.5%)<br>Ischemic heart disease or heart failure (13.8%)<br>Diabetes (30.4%)                                             | Inpatient Intensive care (79.6%) | Severe (100%)                              | 46                                     | Iv (2Peer-reviewed publication%)<br>Niv or cpap (25.1%)<br>Open system (54.0%) | dexamethasone (12 mg) (12 mg daily for up to 10 days)<br>dexamethasone (6 mg) (6 mg daily for up to 10 days) | Mortality<br>Mechanical ventilation<br>Ventilator-free days                                   |
| Murai, 2021 <sup>231</sup>                      | Peer-reviewed publication<br>NCT04449718     | 240  | Brazil                              | 56.2     | 56.1   | Copd (5.1%)<br>Asthma (5.9%)<br>Cardiovascular disease (13.5%)<br>Diabetes (35.4%)<br>Hypertension (52.7%)                      | Inpatient                        | Severe (100%)                              | 13.3                                   | Supplementla oxygen (76.2%)<br>Niv (13.3%)<br>Iv (0.0%)                        | vitamin D3 (200,000 IU/10 ml once)<br>placebo                                                                | Mortality<br>Mechanical ventilation<br>Duration of hospitalization<br>Duration of ventilation |

| Study                              | Publication status<br>Registration                | n  | Country | Mean age | % Male | Comorbidities                                                                                                                                                        | Type of care | Severity      | % Mechanical ventilation (at baseline) | Detailed ventilation (%)                                                                                        | Treatments (dose and duration)                                                                                                                                                              | Outcomes                                                                                                                               |
|------------------------------------|---------------------------------------------------|----|---------|----------|--------|----------------------------------------------------------------------------------------------------------------------------------------------------------------------|--------------|---------------|----------------------------------------|-----------------------------------------------------------------------------------------------------------------|---------------------------------------------------------------------------------------------------------------------------------------------------------------------------------------------|----------------------------------------------------------------------------------------------------------------------------------------|
| Méndez-Flores, 2021 <sup>232</sup> | Pre-print<br>NCT04517162                          | 89 | Mexico  | 48.5     | 41.6   | Chronic respiratory disease (2.2%)<br>Asthma (4.5%)<br>Coronary artery disease (0.0%)<br>Congestive heart failure (1.1%)<br>Diabetes (16.9%)<br>Hypertension (20.2%) | Outpatient   | NR            | NR                                     | NR                                                                                                              | polymerized type I collagen (intramuscular dose of polymerized type I collagen (1.5 ml, equivalent to 12.5 mg of collagen) every 12 h for 3 days and then every 24 h for 4 days)<br>placebo | Mortality<br>Mechanical ventilation<br>Admission to hospital<br>Duration of hospitalization                                            |
| Najmeddin, 2021 <sup>233</sup>     | Peer-reviewed publication<br>IRCT20151113025025N3 | 66 | Iran    | 66.3     | 46.9   | Copd (1.6%)<br>Severe asthma (0.0%)<br>Congestive heart failure or arrhythmia (0.0%)<br>Ischemic heart disease (25.0%)<br>Diabetes (50.0%)<br>Hypertension (100.0%)  | Inpatient    | Severe (100%) | 12.5                                   | Nasal cannula (1.6%)<br>Simple face mask (25.0%)<br>Face mask with reservoir (57.8%)<br>Niv (4.7%)<br>Iv (7.8%) | ACEi/ARB (continued)<br>ACEi/ARB (changed)                                                                                                                                                  | Mortality<br>Mechanical ventilation<br>Adverse effects leading to discontinuation<br>Duration of hospitalization<br>ICU length of stay |

| Study                                   | Publication status<br>Registration                | n    | Country | Mean age | % Male | Comorbidities                                                                              | Type of care | Severity              | % Mechanical ventilation (at baseline) | Detailed ventilation (%) | Treatments (dose and duration)                                                                                                                                                                                                                                                                       | Outcomes                                                                                       |
|-----------------------------------------|---------------------------------------------------|------|---------|----------|--------|--------------------------------------------------------------------------------------------|--------------|-----------------------|----------------------------------------|--------------------------|------------------------------------------------------------------------------------------------------------------------------------------------------------------------------------------------------------------------------------------------------------------------------------------------------|------------------------------------------------------------------------------------------------|
| Niaee, 2020 <sup>234</sup>              | Pre-print<br>IRCT20200408046987N1                 | 180  | Iran    | 56       | 50     | NR                                                                                         | Inpatient    | Mild/Moderate (86.7%) | NR                                     | NR                       | standard care<br>placebo<br>ivermectin (200 mcg/kg) (200 µg/kg single dose)<br>ivermectin (200 (200 µg/kg on days 1, 3, and 5) 200 () 200 mcg/kg) ()<br>ivermectin (400 mcg/kg) (400 µg/kg single dose)<br>ivermectin (400 (400 µg/kg on day 1, and 200 µg/kg on days 1 and 5) 200 () 200 mcg/kg) () | Mortality<br>Duration of hospitalization                                                       |
| Niktale, 2021<br>Nicovid <sup>235</sup> | Peer-reviewed publication                         | 1512 | Iran    | 48.5     | 56.2   | NR                                                                                         | NR           | NR                    | 0                                      | Ventilation (0.0%)       | organosulfur (90 mg/kg, 3 times a day for 14 days)<br>placebo (capsule of same appearance)                                                                                                                                                                                                           | NR                                                                                             |
| Nojomi, 202 <sup>236</sup> 0            | Peer-reviewed publication<br>IRCT20180725040596N2 | 100  | Iran    | 56.4     | 60     | Asthma (2.0%)<br>Coronary heart disease (9.0%)<br>Diabetes (28.0%)<br>Hypertension (39.0%) | Inpatient    | Mild/Moderate (77.0%) | NR                                     | NR                       | hydroxychloroquine (1 day) (400 mg/day for 1 day) lopinavir-ritonavir (400 mg twice daily for up to 14 days)<br>hydroxychloroquine (7 to 14 days) (400 mg twice daily for 7 to 14 days) umifenovir (200                                                                                              | Mortality<br>Mechanical ventilation<br>Duration of hospitalization<br>Time to symptom/clinical |

| Study                             | Publication status<br>Registration                 | n  | Country | Mean age | % Male | Comorbidities                                                                                      | Type of care | Severity               | % Mechanical ventilation (at baseline) | Detailed ventilation (%) | Treatments (dose and duration)                                                             | Outcomes                                                                                                                                                           |
|-----------------------------------|----------------------------------------------------|----|---------|----------|--------|----------------------------------------------------------------------------------------------------|--------------|------------------------|----------------------------------------|--------------------------|--------------------------------------------------------------------------------------------|--------------------------------------------------------------------------------------------------------------------------------------------------------------------|
|                                   |                                                    |    |         |          |        |                                                                                                    |              |                        |                                        |                          | mg three times daily for 7 to 14 days)                                                     | improvement                                                                                                                                                        |
| Nouri-Vaskeh, 2021 <sup>237</sup> | Peer-reviewed publication<br>IRCT20180802040678N4  | 82 | Iran    | 63.8     | 51.2   | Copd/asthma (15.0%)<br>Cardiovascular disease (18.8%)<br>Diabetes (23.8%)<br>Hypertension (100.0%) | Inpatient    | NR                     | NR                                     | NR                       | losartan (25 mg twice daily for 14 days)<br>amlodipine (5 mg/day for at least for 14 days) | Mortality<br>Mechanical ventilation<br>Adverse effects leading to discontinuation<br>Duration of hospitalization<br>ICU length of stay                             |
| Nourian, 2020 <sup>238</sup>      | Peer-reviewed publication<br>IRCT20100228003449N29 | 90 | Iran    | 62.2     | NR     | Copd (4.9%)<br>Cardiovascular disease (31.7%)<br>Diabetes (45.1%)<br>Hypertension (45.1%)          | Inpatient    | Mild/Moderate (100.0%) | NR                                     | NR                       | sofosbuvir-ledipasvir (400 mg/90 mg daily for 10 days)<br>standard care                    | Mortality<br>Mechanical ventilation<br>Adverse effects leading to discontinuation<br>Duration of hospitalization<br>ICU length of stay<br>Time to symptom/clinical |

| Study                                    | Publication status<br>Registration       | n    | Country       | Mean age | % Male | Comorbidities                                                                             | Type of care                         | Severity      | % Mechanical ventilation (at baseline) | Detailed ventilation (%) | Treatments (dose and duration)                                                                                                                                                                                                                                 | Outcomes                                                             |
|------------------------------------------|------------------------------------------|------|---------------|----------|--------|-------------------------------------------------------------------------------------------|--------------------------------------|---------------|----------------------------------------|--------------------------|----------------------------------------------------------------------------------------------------------------------------------------------------------------------------------------------------------------------------------------------------------------|----------------------------------------------------------------------|
|                                          |                                          |      |               |          |        |                                                                                           |                                      |               |                                        |                          |                                                                                                                                                                                                                                                                | nical improvemen<br>t                                                |
| Ogbuagu, 2021 <sup>239</sup>             | Data from authors<br>NCT04252664         | 1005 | China         | NR       | NR     | NR                                                                                        | Inpatient                            | Severe (100%) | NR                                     | NR                       | remdesivir (100 mg once daily for 5 or 10 days)<br>standard care                                                                                                                                                                                               | NR                                                                   |
| Oldenburg, 2021<br>ACTION <sup>240</sup> | Peer-reviewed publication<br>NCT04332107 | 263  | United States | 42.7     | 33.1   | Asthma (12.2%)<br>Copd (1.5%)<br>Stroke (0.8%)<br>Diabetes (3.8%)<br>Hypertension (12.2%) | Outpatient                           | NR            | NR                                     | NR                       | azithromycin (1.2 g given once orally)<br>placebo                                                                                                                                                                                                              | Mortality<br>Admission to hospital                                   |
| Oliynyk, 2021 <sup>241</sup>             | Peer-reviewed publication<br>0112U001413 | 126  | Ukraine       | 70.7     | 60.3   | NR                                                                                        | Inpatient<br>Intensive care (100.0%) | Severe (100%) | NR                                     | Intubation (0.0%)        | prophylactic-dose enoxaparin (50 anti-Xa IU/kg per day subcutaneously until d-Dimer levels normalize)<br>therapeutic-dose enoxaparin (100 anti-Xa IU/kg twice a day subcutaneously until d-Dimer levels normalize)<br>heparin sodium (80 U/kg/h intravenously, | Mortality<br>Mechanical ventilation<br>Clinically important bleeding |

| Study                                                              | Publication status<br>Registration          | n    | Country        | Mean age | % Male | Comorbidities                                                                                                     | Type of care | Severity               | % Mechanical ventilation (at baseline) | Detailed ventilation (%) | Treatments (dose and duration)                                                                                                                               | Outcomes                                                                                            |
|--------------------------------------------------------------------|---------------------------------------------|------|----------------|----------|--------|-------------------------------------------------------------------------------------------------------------------|--------------|------------------------|----------------------------------------|--------------------------|--------------------------------------------------------------------------------------------------------------------------------------------------------------|-----------------------------------------------------------------------------------------------------|
|                                                                    |                                             |      |                |          |        |                                                                                                                   |              |                        |                                        |                          | followed by a maintenance dose of 18 U/kg/h until d-Dimer levels normalize)                                                                                  |                                                                                                     |
| Omrani, 2020 Q-PROTECT <sup>242</sup>                              | Peer-reviewed publication<br>NCT04349592    | 456  | Qatar          | 41       | 98.5   | NR                                                                                                                | Outpatient   | Mild/Moderate (100.0%) | NR                                     | NR                       | azithromycin (200 mg every 7 hours for 7 days)<br>hydroxychloroquine (250 mg once daily for 5 days)<br>hydroxychloroquine placebo                            | Mortality<br>Admission to hospital<br>Adverse effects leading to discontinuation<br>Viral clearance |
| Onal, 2021 <sup>243</sup>                                          | Pre-print<br>NCT04377789                    | 447  | Turkey         | NR       | 56.6   | Copd (6.0%)<br>Asthma (13.9%)<br>Tb (2.0%)<br>Cardiac disease (22.6%)<br>Diabetes (28.2%)<br>Hypertension (38.7%) | Inpatient    | Severe (100%)          | NR                                     | NR                       | bromelain (100 mg/day in two divided doses)<br>quercetin (1000 mg/day in two divided doses)<br>vitamin C (1000 mg/day in two divided doses)<br>standard care | Mortality                                                                                           |
| PRINCIPLE Trial Collaborative Group, 2021 PRINCIPLE <sup>244</sup> | Peer-reviewed publication<br>ISRCTN86534580 | 1979 | United Kingdom | 60.7     | 43     | Asthma, chronic obstructive pulmonary disease, or                                                                 | Outpatient   | NR                     | NR                                     | NR                       | azithromycin (500 mg once daily for three days)<br>standard care                                                                                             | Mortality<br>Mechanical ventilation<br>Admission to hospital                                        |

| Study                            | Publication status<br>Registration | n  | Country | Mean age | % Male | Comorbidities                                                                                                                                           | Type of care | Severity               | % Mechanical ventilation<br>(at baseline) | Detailed ventilation (%) | Treatments (dose and duration)                                                                   | Outcomes                             |
|----------------------------------|------------------------------------|----|---------|----------|--------|---------------------------------------------------------------------------------------------------------------------------------------------------------|--------------|------------------------|-------------------------------------------|--------------------------|--------------------------------------------------------------------------------------------------|--------------------------------------|
|                                  |                                    |    |         |          |        | lung disease (35.9%)<br>Angina, heart attack, heart failure, atrial fibrillation, or valve problems (14.5%)<br>Diabetes (18.1%)<br>Hypertension (39.7%) |              |                        |                                           |                          | other trial interventions                                                                        | Time to symptom/clinical improvement |
| Padmanabhan, 2020 <sup>245</sup> | Pre-print<br>CTRI/2020/05/025013   | 60 | India   | 45.2     | 60     | NR                                                                                                                                                      | Inpatient    | Mild/Moderate (100.0%) | NR                                        | NR                       | Bacille Calmette-Guérin (single dose of 0.1 ml of 2.0 - 8.0 x 10 <sup>6</sup> c.f.u.)<br>placebo | Mortality                            |

| Study                                                   | Publication status<br>Registration                          | n    | Country                                                                                                                                                                                                                                                                                     | Mean age | % Male | Comorbidities                                                                             | Type of care | Severity | % Mechanical ventilation<br>(at baseline) | Detailed ventilation (%)                          | Treatments (dose and duration)                                       | Outcomes                                                            |
|---------------------------------------------------------|-------------------------------------------------------------|------|---------------------------------------------------------------------------------------------------------------------------------------------------------------------------------------------------------------------------------------------------------------------------------------------|----------|--------|-------------------------------------------------------------------------------------------|--------------|----------|-------------------------------------------|---------------------------------------------------|----------------------------------------------------------------------|---------------------------------------------------------------------|
| Pan_hydroxyc hloroquine, 2020 SOLIDARITY <sup>246</sup> | Peer-reviewed publication<br>ISRCTN83971151,<br>NCT04315948 | 1854 | Albania, Argentina, Austria, Belgium, Brazil, Canada, Colombia, Egypt, Finland, France, Honduras, India, Indonesia, Iran, Ireland, Italy, Kuwait, Lebanon, Lithuania, Luxembourg, Macedonia, Malaysia, Norway, Pakistan, Phillippines, Peru, Saudi Arabia, South Africa, Spain, Switzerland | NR       | 59.9   | Chronic lung disease (6.9%)<br>Asthma (4.7%)<br>Heart disease (20.9%)<br>Diabetes (21.8%) | Inpatient    | NR       | 9                                         | Supplemental oxygen (54.0%)<br>Ventilation (9.0%) | hydroxychloroquine (200 mg twice daily for 10 days)<br>standard care | Mortality<br>Mechanical ventilation<br>Duration of hospitalizati on |

| Study                                             | Publication status<br>Registration                          | n    | Country                                                                                                                                                                                                                                                                                     | Mean age | % Male | Comorbidities                                                                             | Type of care | Severity | % Mechanical ventilation<br>(at baseline) | Detailed ventilation (%)                          | Treatments (dose and duration)                                                       | Outcomes                                                           |
|---------------------------------------------------|-------------------------------------------------------------|------|---------------------------------------------------------------------------------------------------------------------------------------------------------------------------------------------------------------------------------------------------------------------------------------------|----------|--------|-------------------------------------------------------------------------------------------|--------------|----------|-------------------------------------------|---------------------------------------------------|--------------------------------------------------------------------------------------|--------------------------------------------------------------------|
| Pan_interferon, 2020<br>SOLIDARITY <sup>246</sup> | Peer-reviewed publication<br>ISRCTN83971151,<br>NCT04315948 | 4127 | Albania, Argentina, Austria, Belgium, Brazil, Canada, Colombia, Egypt, Finland, France, Honduras, India, Indonesia, Iran, Ireland, Italy, Kuwait, Lebanon, Lithuania, Luxembourg, Macedonia, Malaysia, Norway, Pakistan, Phillippines, Peru, Saudi Arabia, South Africa, Spain, Switzerland | NR       | 63     | Chronic lung disease (5.4%)<br>Asthma (4.2%)<br>Heart disease (21.5%)<br>Diabetes (25.0%) | Inpatient    | NR       | 6.6                                       | Supplemental oxygen (69.7%)<br>Ventilation (6.6%) | interferon beta (subcutaneous) (44 µg three times daily for 6 days)<br>standard care | Mortality<br>Mechanical ventilation<br>Duration of hospitalization |

| Study                                            | Publication status<br>Registration                          | n    | Country                                                                                                                                                                                                                                                                                     | Mean age | % Male | Comorbidities                                                                             | Type of care | Severity | % Mechanical ventilation (at baseline) | Detailed ventilation (%)                          | Treatments (dose and duration)                                               | Outcomes                                                           |
|--------------------------------------------------|-------------------------------------------------------------|------|---------------------------------------------------------------------------------------------------------------------------------------------------------------------------------------------------------------------------------------------------------------------------------------------|----------|--------|-------------------------------------------------------------------------------------------|--------------|----------|----------------------------------------|---------------------------------------------------|------------------------------------------------------------------------------|--------------------------------------------------------------------|
| Pan_lopinavir, 2020<br>SOLIDARITY <sup>246</sup> | Peer-reviewed publication<br>ISRCTN83971151,<br>NCT04315948 | 2791 | Albania, Argentina, Austria, Belgium, Brazil, Canada, Colombia, Egypt, Finland, France, Honduras, India, Indonesia, Iran, Ireland, Italy, Kuwait, Lebanon, Lithuania, Luxembourg, Macedonia, Malaysia, Norway, Pakistan, Phillippines, Peru, Saudi Arabia, South Africa, Spain, Switzerland | NR       | 59.6   | Chronic lung disease (6.6%)<br>Asthma (4.4%)<br>Heart disease (20.9%)<br>Diabetes (24.0%) | Inpatient    | NR       | 8.2                                    | Supplemental oxygen (53.3%)<br>Ventilation (8.2%) | lopinavir-ritonavir (400 mg/100 mg twice daily for 14 days)<br>standard care | Mortality<br>Mechanical ventilation<br>Duration of hospitalization |

| Study                                              | Publication status<br>Registration                          | n    | Country                                                                                                                                                                                                                                                                                     | Mean age | % Male | Comorbidities                                                                             | Type of care | Severity | % Mechanical ventilation (at baseline) | Detailed ventilation (%)                          | Treatments (dose and duration)                       | Outcomes                                                           |
|----------------------------------------------------|-------------------------------------------------------------|------|---------------------------------------------------------------------------------------------------------------------------------------------------------------------------------------------------------------------------------------------------------------------------------------------|----------|--------|-------------------------------------------------------------------------------------------|--------------|----------|----------------------------------------|---------------------------------------------------|------------------------------------------------------|--------------------------------------------------------------------|
| Pan_remedesivir, 2020<br>SOLIDARITY <sup>246</sup> | Peer-reviewed publication<br>ISRCTN83971151,<br>NCT04315948 | 5475 | Albania, Argentina, Austria, Belgium, Brazil, Canada, Colombia, Egypt, Finland, France, Honduras, India, Indonesia, Iran, Ireland, Italy, Kuwait, Lebanon, Lithuania, Luxembourg, Macedonia, Malaysia, Norway, Pakistan, Phillippines, Peru, Saudi Arabia, South Africa, Spain, Switzerland | NR       | 62.9   | Chronic lung disease (5.4%)<br>Asthma (5.1%)<br>Heart disease (20.9%)<br>Diabetes (25.2%) | Inpatient    | NR       | 8.9                                    | Supplemental oxygen (66.8%)<br>Ventilation (8.9%) | remdesivir (100 mg/day for 10 days)<br>standard care | Mortality<br>Mechanical ventilation<br>Duration of hospitalization |

| Study                                                        | Publication status<br>Registration               | n  | Country | Mean age | % Male | Comorbidities                                                             | Type of care                         | Severity                                   | % Mechanical ventilation (at baseline) | Detailed ventilation (%)       | Treatments (dose and duration)                                                                                                                                                        | Outcomes                                                                                                                            |
|--------------------------------------------------------------|--------------------------------------------------|----|---------|----------|--------|---------------------------------------------------------------------------|--------------------------------------|--------------------------------------------|----------------------------------------|--------------------------------|---------------------------------------------------------------------------------------------------------------------------------------------------------------------------------------|-------------------------------------------------------------------------------------------------------------------------------------|
| Pandit, 2021 <sup>46</sup>                                   | Peer-reviewed publication<br>CTRI/2020/06/026087 | 40 | India   | 49.2     | 75     | Uncontrolled diabetes mellitus (0.0%)<br>Uncontrolled hypertension (0.0%) | Inpatient                            | Mild/Moderate (100.0%)                     | NR                                     | NR                             | subcutaneous peginterferon alfa-2b (1 µg/kg single dose)<br>standard care                                                                                                             | Mortality<br>Mechanical ventilation<br>Adverse effects leading to discontinuation<br>Viral clearance<br>Duration of hospitalization |
| Pantos, 2021<br>Thy-Support <sup>247</sup>                   | Pre-print<br>NCT04348513                         | 5  | Greece  | 65.2     | NR     | NR                                                                        | Inpatient<br>Intensive care (100.0%) | Severe (100%)<br>Severe: Critical (100.0%) | NR                                     | NR                             | triiodothyronine (0.057 g/kg over 1 hour, for a maximum of 30 days)<br>placebo                                                                                                        | NR                                                                                                                                  |
| Parienti, 2021<br>Attenuate R0<br>Coronavirus <sup>248</sup> | Peer-reviewed publication<br>NCT04685512         | 60 | France  | 45.2     | 43.3   | Diabetes (3.3%)<br>Hypertension (5.0%)                                    | Outpatient                           | Mild/Moderate (100.0%)                     | 0                                      | Unspecified ventilation (0.0%) | emtricitabine (200 mg of emtricitabine given once daily and 245 mg of tenofovir disoproxil fumarate given once daily for 7 days)<br>tenofovir disoproxil fumarate ()<br>standard care | Mortality<br>Admission to hospital<br>Adverse effects leading to discontinuation                                                    |

| Study                                           | Publication status<br>Registration               | n   | Country   | Mean age | % Male | Comorbidities                                                                                                                                                | Type of care | Severity      | % Mechanical ventilation (at baseline) | Detailed ventilation (%)                                            | Treatments (dose and duration)                                                                                                       | Outcomes                                                                                                                                                                       |
|-------------------------------------------------|--------------------------------------------------|-----|-----------|----------|--------|--------------------------------------------------------------------------------------------------------------------------------------------------------------|--------------|---------------|----------------------------------------|---------------------------------------------------------------------|--------------------------------------------------------------------------------------------------------------------------------------|--------------------------------------------------------------------------------------------------------------------------------------------------------------------------------|
| Pascual-Figal, 2021<br>COL-COVID <sup>249</sup> | Peer-reviewed publication<br>NCT04350320         | 103 | Spain     | 51       | 52.4   | Copd (1.0%)<br>Obstructive sleep apnea (6.8%)<br>Cardiovascular disease (2.9%)<br>Cerebrovascular disease (1.9%)<br>Diabetes (14.6%)<br>Hypertension (27.2%) | Inpatient    | NR            | 0                                      | Niv, iv, ecmo (0.0%)                                                | colchicine (1.5 mg, followed by 0.5 mg every 12 hours during the next 7 days and 0.5 mg every 24 hours for 20 days)<br>standard care | Mortality<br>Mechanical ventilation<br>Adverse effects leading to discontinuation<br>Duration of hospitalization<br>ICU length of stay<br>Time to symptom/clinical improvement |
| Patel_1, 2021 <sup>250</sup>                    | Peer-reviewed publication<br>ACTRN12620000454976 | 33  | Australia | 62       | 63.6   | Chronic respiratory disease (6.1%)<br>Chronic cardiovascular disease (21.2%)<br>Diabetes (18.2%)<br>Hypertension (48.5%)                                     | Inpatient    | Severe (100%) | 15.1                                   | Supplemental oxygen (39.4%)<br>High-flow or niv (6.1%)<br>Iv (9.1%) | zinc (0.5 mg/kg/d (elemental zinc concentration 0.24 mg/kg/d) for a maximum of 7 days)<br>standard care                              | Mortality<br>Mechanical ventilation                                                                                                                                            |

| Study                                 | Publication status<br>Registration               | n   | Country                                                                                                                                                                        | Mean age | % Male | Comorbidities                                                                             | Type of care                        | Severity                                | % Mechanical ventilation (at baseline) | Detailed ventilation (%)               | Treatments (dose and duration)                                                                                                                            | Outcomes                                                                                               |
|---------------------------------------|--------------------------------------------------|-----|--------------------------------------------------------------------------------------------------------------------------------------------------------------------------------|----------|--------|-------------------------------------------------------------------------------------------|-------------------------------------|-----------------------------------------|----------------------------------------|----------------------------------------|-----------------------------------------------------------------------------------------------------------------------------------------------------------|--------------------------------------------------------------------------------------------------------|
| Patel_2, 2021<br>OSCAR <sup>251</sup> | Pre-print<br>NCT04376684                         | 806 | Argentina, Belgium, Brazil, Canada, Chile, France, India, Japan, Mexico, Netherlands, Peru, Poland, Russian Federation, South Africa, Spain, United Kingdom, and United States | 59.6     | 71.6   | Heart disorder (11.9%)<br>Diabetes (36.7%)<br>Hypertension (49.8%)                        | Inpatient<br>Intensive care (52.1%) | Severe (100%)                           | 99.2                                   | High-flow or niv (77.2%)<br>lv (22.1%) | otilimab (90 mg single infusion for one hour)<br>placebo                                                                                                  | Mortality<br>Duration of hospitalization<br>ICU length of stay<br>Time to symptom/clinical improvement |
| Pawar, 2021 <sup>252</sup>            | Peer-reviewed publication<br>CTRI/2020/05/025482 | 140 | India                                                                                                                                                                          | NR       | 70.7   | NR                                                                                        | Inpatient<br>Intensive care (21.4%) | Mild/Moderate (78.6%)<br>Severe (21.4%) | NR                                     | ventilator (0.0%)                      | curcumin (525mg and 2.5mg twice a day for 14 days) piperine ()<br>probiotics (probiotics twice daily for 14 days)                                         | Mortality<br>Mechanical ventilation                                                                    |
| Perepu, 2021 <sup>253</sup>           | Peer-reviewed publication<br>NCT04360824         | 176 | United States                                                                                                                                                                  | 64       | 56.1   | Lung disease (22.5%)<br>Heart disease (31.2%)<br>Diabetes (37.0%)<br>Hypertension (60.1%) | Inpatient<br>Intensive care (61.9%) | Severe (100%)                           | 23.1                                   | lv (23.1%)                             | Intermediate-dose enoxaparin (1 mg/kg subcutaneous daily if the BMI was < 30 or 0.5 mg/kg subcutaneous twice daily if the BMI was ≥ 30.)<br>standard care | Mortality<br>Venous thromboembolism<br>Clinically important bleeding                                   |

| Study                                     | Publication status<br>Registration       | n   | Country       | Mean age | % Male | Comorbidities | Type of care | Severity               | % Mechanical ventilation (at baseline) | Detailed ventilation (%)       | Treatments (dose and duration)                                                                                                                                                                                                        | Outcomes                                                                                                           |
|-------------------------------------------|------------------------------------------|-----|---------------|----------|--------|---------------|--------------|------------------------|----------------------------------------|--------------------------------|---------------------------------------------------------------------------------------------------------------------------------------------------------------------------------------------------------------------------------------|--------------------------------------------------------------------------------------------------------------------|
| Perlin, 2021 <sup>254</sup>               | Pre-print<br>NCT04412057                 | 83  | United States | 58.6     | 68.7   | NR            | Inpatient    | Severe (100%)          | 0                                      | Mechanical ventilation (0.0%)  | CERC-002 (16 mg/kg up to 1200 mg single dose)<br>placebo                                                                                                                                                                              | Mortality                                                                                                          |
| Pott-Junior, 2021<br>IFORS <sup>255</sup> | Peer-reviewed publication<br>NCT04431466 | 32  | Brazil        | 49.4     | 45.2   | NR            | Inpatient    | Mild/Moderate (100.0%) | NR                                     | Oxygen supplementation (20.0%) | ivermectin (100 µg/kg) (100 µg/kg cumulative dose over 7 days)<br>ivermectin (200 µg/kg) (200 µg/kg cumulative dose over 7 days)<br>ivermectin (400 µg/kg) (400 µg/kg cumulative dose over 7 days)<br>standard care                   | Mechanical ventilation<br>Adverse effects leading to discontinuation<br>Viral clearance<br>Time to viral clearance |
| Prabowo, 2021 <sup>256</sup>              | Peer-reviewed publication                | 40  | Indonesia     | NR       | NR     | NR            | Inpatient    | NR                     | NR                                     | NR                             | colchicine (0.5 mg twice daily for 7 days)<br>placebo                                                                                                                                                                                 | NR                                                                                                                 |
| Purwati, 2021 <sup>257</sup>              | Peer-reviewed publication                | 754 | Indonesia     | 37       | 95.3   | NR            | Inpatient    | Mild/Moderate (100.0%) | NR                                     | NR                             | azithromycin (500 mg qd) (500 mg once daily)<br>lopinavir-ritonavir (200/50 mg bid) (200/50 mg twice daily)<br>doxycycline (100 mg bid) (a combination of 200/50 mg lopinavir/ritonavir and 100 mg doxycycline twice a day)<br>100 mg | Adverse effects leading to discontinuation<br>Viral clearance                                                      |

| Study                          | Publication status<br>Registration       | n   | Country       | Mean age | % Male | Comorbidities                                                                                | Type of care | Severity | % Mechanical ventilation<br>(at baseline) | Detailed ventilation (%)       | Treatments (dose and duration)                                                                                                                                                                                                                                                                                                                                                                                                                    | Outcomes                                                     |
|--------------------------------|------------------------------------------|-----|---------------|----------|--------|----------------------------------------------------------------------------------------------|--------------|----------|-------------------------------------------|--------------------------------|---------------------------------------------------------------------------------------------------------------------------------------------------------------------------------------------------------------------------------------------------------------------------------------------------------------------------------------------------------------------------------------------------------------------------------------------------|--------------------------------------------------------------|
|                                |                                          |     |               |          |        |                                                                                              |              |          |                                           |                                | twice daily) lopinavir-ritonavir (200/50 mg bid) (200/50 mg twice daily)<br>azithromycin (500 mg qd) (500 mg once daily)<br>hydroxychloroquine (100 mg bid) (100 mg twice daily)<br>azithromycin (500 mg qd) (500 mg once daily) lopinavir-ritonavir (400/100 mg bid) (400/100 mg twice daily)<br>doxycycline (100 mg bid) (100 mg twice daily) lopinavir-ritonavir (400/100 mg bid) (400/100 mg twice daily)<br>azithromycin (500 mg once daily) |                                                              |
| Puskarich, 2021 <sup>258</sup> | Peer-reviewed publication<br>NCT04311177 | 117 | United States | 38.9     | 50.4   | Asthma (10.3%)<br>Copd (0.0%)<br>Chronic bronchitis (0.0%)<br>Obstructive sleep apnea (6.9%) | Outpatient   | NR       | 0                                         | Unspecified ventilation (0.0%) | losartan (25 mg, twice daily for 10 days (for participants with eGFR > 60 mL/min/1.73 m <sup>2</sup> ) or once daily (for participants with eGFR 30–60 mL/min/1.73 m                                                                                                                                                                                                                                                                              | Mortality<br>Mechanical ventilation<br>Admission to hospital |

| Study                            | Publication status<br>Registration | n   | Country                              | Mean age | % Male | Comorbidities                                                                                                                                                                                                                                    | Type of care                        | Severity      | % Mechanical ventilation<br>(at baseline) | Detailed ventilation (%) | Treatments (dose and duration)                                           | Outcomes                                                                                   |
|----------------------------------|------------------------------------|-----|--------------------------------------|----------|--------|--------------------------------------------------------------------------------------------------------------------------------------------------------------------------------------------------------------------------------------------------|-------------------------------------|---------------|-------------------------------------------|--------------------------|--------------------------------------------------------------------------|--------------------------------------------------------------------------------------------|
|                                  |                                    |     |                                      |          |        | Cardiovascular disease (0.0%)<br>Diabetes (6.0%)<br>Hypertension (7.8%)                                                                                                                                                                          |                                     |               |                                           |                          | 2))<br>placebo                                                           |                                                                                            |
| Puskarich_2, 2021 <sup>259</sup> | Pre-print<br>NCT04312009           | 205 | United States                        | 55.1     | 60     | Pulmonary hypertension (4.9%)<br>Asthma (13.2%)<br>Copd (11.7%)<br>Chronic bronchitis (3.9%)<br>Obstructive sleep apnea (16.6%)<br>Coronary artery disease (7.8%)<br>Congestive heart failure (4.4%)<br>Diabetes (22.9%)<br>Hypertension (40.5%) | Inpatient<br>Intensive care (12.7%) | Severe (100%) | NR                                        | NR                       | losartan (50 mg twice daily (100 mg daily total) for 10 days)<br>placebo | Mortality<br>Mechanical ventilation<br>Duration of hospitalization<br>Ventilator-free days |
| REMDACTA_NCT04409262,            | Meta-analysis<br>NCT04409262       | 640 | Spain, United States, Brazil, Russia | 60.3     | 63.3   | NR                                                                                                                                                                                                                                               | Inpatient                           | Severe (100%) | NR                                        | NR                       | tocilizumab (8 mg/kg (up to 800 mg) for one                              | NR                                                                                         |

| Study                                  | Publication status<br>Registration                 | n   | Country                                                                                                          | Mean age | % Male | Comorbidities                                                              | Type of care | Severity      | % Mechanical ventilation (at baseline) | Detailed ventilation (%)                               | Treatments (dose and duration)                                                                                   | Outcomes                                                                                                                                                 |
|----------------------------------------|----------------------------------------------------|-----|------------------------------------------------------------------------------------------------------------------|----------|--------|----------------------------------------------------------------------------|--------------|---------------|----------------------------------------|--------------------------------------------------------|------------------------------------------------------------------------------------------------------------------|----------------------------------------------------------------------------------------------------------------------------------------------------------|
| 2021 REMDACTA <sup>1</sup>             |                                                    |     |                                                                                                                  |          |        |                                                                            |              |               |                                        |                                                        | to two doses) placebo                                                                                            |                                                                                                                                                          |
| RUXCOVID, 2021 RUXCOVID <sup>260</sup> | 3.0 NCT04362137                                    | 432 | United States, Argentina, Brazil, Colombia, France, Germany, Mexico, Peru, Russia, Spain, Turkey, United Kingdom | 56.6     | 54.4   | NR                                                                         | Inpatient    | Severe (100%) | 0                                      | Iv (0.0%)                                              | ruxolitinib (5 mg twice daily for 14 days with possible extension of treatment to 28 days) placebo               | Mortality<br>Mechanical ventilation<br>Adverse effects leading to discontinuation<br>Duration of hospitalization<br>Time to symptom/clinical improvement |
| Raghavan, 2021 <sup>261</sup>          | Peer-reviewed publication<br>CTRI/2021/04/032766   | 24  | India                                                                                                            | 41.2     | 70.8   | NR                                                                         | Inpatient    | NR            | NR                                     | NR                                                     | AFO-202 (3 gm per day) N-163 beta glucans (10 gm per day)<br>AFO-202 beta glucan (3 gm per day)<br>standard care | Mortality<br>Mechanical ventilation<br>Duration of hospitalization                                                                                       |
| Rahmani, 2020 <sup>262</sup>           | Peer-reviewed publication<br>IRCT20100228003449N27 | 80  | Iran                                                                                                             | 60.5     | 59.1   | Asthma (4.5%)<br>COPD (4.5%)<br>Ischemic heart disease (30.3%)<br>Diabetes | Inpatient    | Severe (100%) | 1.5                                    | Supplemental oxygen (98.5%)<br>High-flow or niv (1.5%) | interferon beta-1b (subcutaneous) (250 µg every other day for 14 days)<br>standard care                          | Mortality<br>Mechanical ventilation<br>Duration of hospitalization                                                                                       |

| 122                                        |                                          |     |                |          |        |                                                                            |              |                                                     |                                        |                                        |                                                                                                                                       |                                                                    |
|--------------------------------------------|------------------------------------------|-----|----------------|----------|--------|----------------------------------------------------------------------------|--------------|-----------------------------------------------------|----------------------------------------|----------------------------------------|---------------------------------------------------------------------------------------------------------------------------------------|--------------------------------------------------------------------|
| Study                                      | Publication status<br>Registration       | n   | Country        | Mean age | % Male | Comorbidities                                                              | Type of care | Severity                                            | % Mechanical ventilation (at baseline) | Detailed ventilation (%)               | Treatments (dose and duration)                                                                                                        | Outcomes                                                           |
|                                            |                                          |     |                |          |        | (31.8%) Hypertension (56.1%)                                               |              |                                                     |                                        |                                        |                                                                                                                                       | ICU length of stay<br>Time to symptom/clinical improvement         |
| Ramachandran, 2021 <sup>263</sup>          | Pre-print<br>CTRI/2020/09/027535         | 132 | India          | 46.7     | 74.8   | Asthma (0.0%)<br>Diabetes (0.0%)                                           | NR           | Mild/Moderate (69.1000000000001%)<br>Severe (33.3%) | 0                                      | Unspecified ventilation (0.0%)         | umifenovir (800 mg twice daily for 14 days)<br>placebo                                                                                | Mortality<br>Viral clearance                                       |
| Ramakrishnan, 2021<br>STOIC <sup>264</sup> | Peer-reviewed publication<br>NCT04416399 | 146 | United Kingdom | 45       | 42.5   | Asthma (15.1%)<br>Cardiovascular disease (8.6%)<br>Diabetes (5.0%)         | Outpatient   | Mild/Moderate (100.0%)                              | 0                                      | Supplemental oxygen, niv, or iv (0.0%) | inhaled budesonide (800 µg twice daily until recovered)<br>standard care                                                              | Time to symptom/clinical improvement                               |
| Ranjbar, 2021 <sup>265</sup>               | Pre-print<br>IRCT20200204046369N1        | 93  | Iran           | 58.7     | 57     | Cardiovascular disease (30.2%)<br>Diabetes (32.6%)<br>Hypertension (45.4%) | Inpatient    | NR                                                  | NR                                     | NR                                     | methylprednisolone (2 mg/kg infused over 1 hr, which was tapered to half dosage every 5 days)<br>dexamethasone (6 mg/day for 10 days) | Mortality<br>Mechanical ventilation<br>Duration of hospitalization |
| Rashad_1, 2021 <sup>266</sup>              | Pre-print                                | 305 | Egypt          | 44.4     | 70.2   | NR                                                                         | Outpatient   | Mild/Moderate (100.0%)                              | NR                                     | NR                                     | azithromycin (500 mg/day for 7 days)<br>clarithromycin (500                                                                           | Time to symptom/clinical improvement                               |

| Study                            | Publication status<br>Registration                      | n   | Country | Mean age | % Male | Comorbidities                                                                                              | Type of care                         | Severity                                   | % Mechanical ventilation<br>(at baseline) | Detailed ventilation (%)       | Treatments (dose and duration)                                                                                                                                  | Outcomes                                                                        |
|----------------------------------|---------------------------------------------------------|-----|---------|----------|--------|------------------------------------------------------------------------------------------------------------|--------------------------------------|--------------------------------------------|-------------------------------------------|--------------------------------|-----------------------------------------------------------------------------------------------------------------------------------------------------------------|---------------------------------------------------------------------------------|
|                                  |                                                         |     |         |          |        |                                                                                                            |                                      |                                            |                                           |                                | mg/day for 7 days)<br>standard care                                                                                                                             | t<br>Time to to<br>viral<br>clearance                                           |
| Rashad_2,<br>2021 <sup>267</sup> | Peer-reviewed publication<br>CT04519385<br>(19/08/2020) | 149 | Egypt   | 62.5     | 56.9   | Asthma (2.7%)<br>Copd (1.8%)<br>Cardiovascular disease (12.8%)<br>Diabetes (28.4%)<br>Hypertension (47.7%) | Inpatient<br>Intensive care (100.0%) | Severe (100%)<br>Severe: Critical (100.0%) | 100                                       | Niv (64.2%)<br>Iv (35.8%)      | tocilizumab (4 mg/kg/dose in 100 cc normal saline over one hour repeated after 24 h)<br>dexamethasone (4 mg/kg/day for 3-days followed by 8 mg/day for 10-days) | Mortality                                                                       |
| Rashad_3,<br>2021 <sup>268</sup> | Peer-reviewed publication<br>NCT04622891                | 305 | Egypt   | 44.4     | 70.2   | NR                                                                                                         | NR                                   | Mild/Moderate (100.0%)                     | 0                                         | Unspecified ventilation (0.0%) | azithromycin (500 mg once daily for 7 days)<br>clarithromycin (500 mg twice daily for 7 days)<br>standard care                                                  | Mortality<br>Time to symptom/clinical improvement<br>Time to to viral clearance |
| Rashid,<br>2021 <sup>269</sup>   | Peer-reviewed publication<br>NCT04569825                | 276 | Iraq    | 29.5     | 28.3   | NR                                                                                                         | Outpatient                           | NR                                         | NR                                        | NR                             | intranasal betamethasone (0.1 mg/mL three times daily until recovery up to 30 days)<br>placebo                                                                  | NR                                                                              |

| Study                                 | Publication status<br>Registration               | n   | Country | Mean age | % Male | Comorbidities                                                                                                                     | Type of care | Severity               | % Mechanical ventilation (at baseline) | Detailed ventilation (%) | Treatments (dose and duration)                                                                                                                        | Outcomes                                                                                              |
|---------------------------------------|--------------------------------------------------|-----|---------|----------|--------|-----------------------------------------------------------------------------------------------------------------------------------|--------------|------------------------|----------------------------------------|--------------------------|-------------------------------------------------------------------------------------------------------------------------------------------------------|-------------------------------------------------------------------------------------------------------|
| Rastogi, 2020<br>SHADE <sup>270</sup> | Peer-reviewed publication<br>NCT04459247         | 40  | India   | 48.5     | 50     | Hypertension (0.0%)                                                                                                               | Inpatient    | Mild/Moderate (100.0%) | 0                                      | Iv (0.0%)                | vitamin D (60000 IU/5 ml/day for 7 days)<br>placebo                                                                                                   | Adverse effects leading to discontinuation<br>Time to viral clearance                                 |
| Ravichandran, 2021 <sup>271</sup>     | Pre-print<br>CTRI/2021/05/033544                 | 0   | India   | 47       | 56.2   | Severe asthma, (0.0%)<br>Recent heart attack (0.0%)<br>Diabetes (29.0%)<br>Hypertension (19.0%)                                   | Inpatient    | NR                     | NR                                     | NR                       | indomethacin (75 mg once daily for 5 days for BMI < 30/ 75 mg twice daily for 5 days for BMI >30)<br>paracetamol (650 mg four times daily for 5 days) | Adverse effects leading to discontinuation<br>Viral clearance<br>Time to symptom/clinical improvement |
| Ravikirti, 2021 <sup>272</sup>        | Peer-reviewed publication<br>CTRI/2020/08/027225 | 115 | India   | 52.5     | 72.3   | Copd (0.9%)<br>Asthma (0.9%)<br>Ischemic heart disease (8.9%)<br>Heart failure (1.8%)<br>Diabetes (35.7%)<br>Hypertension (34.8%) | Inpatient    | Mild/Moderate (100.0%) | NR                                     | NR                       | ivermectin (12 mg/day for 2 days)<br>placebo                                                                                                          | Mortality<br>Mechanical ventilation<br>Viral clearance                                                |

| Study                                         | Publication status<br>Registration | n    | Country               | Mean age | % Male | Comorbidities                                                                                                                              | Type of care | Severity | % Mechanical ventilation<br>(at baseline) | Detailed ventilation (%)               | Treatments (dose and duration)                                                                                          | Outcomes                                                                                                                                  |
|-----------------------------------------------|------------------------------------|------|-----------------------|----------|--------|--------------------------------------------------------------------------------------------------------------------------------------------|--------------|----------|-------------------------------------------|----------------------------------------|-------------------------------------------------------------------------------------------------------------------------|-------------------------------------------------------------------------------------------------------------------------------------------|
| Reiersen, 2021<br>STOP-COVID-2 <sup>273</sup> | Data from authors<br>NCT04668950   | 547  | Canada, United States | 48       | 38     | Asthma (13.3%)<br>Lung disease (0.7%)<br>Heart disease (1.5%)<br>Diabetes (9.3%)<br>Hypertension (21.4%)                                   | Outpatient   | NR       | NR                                        | Supplemental oxygen (0.0%)             | fluvoxamine (100 mg twice daily for 15 days)<br>placebo                                                                 | Admission to hospital                                                                                                                     |
| Reis_1, 2020<br>TOGETHER <sup>274</sup>       | Data from authors<br>NCT04403100   | 685  | Brazil                | 53       | 45     | Asthma (8.6%)<br>Copd (2.5%)<br>Cardiovascular disease (3.9%)<br>T2DM (13.1%)<br>T1DM (6.3%)<br>Hypertension (49.3%)                       | Outpatient   | NR       | 0                                         | Supplemental oxygen, niv, or iv (0.0%) | hydroxychloroquine (400 mg daily for 10 days)<br>lopinavir-ritonavir (400 mg/100 mg twice daily for 10 days)<br>placebo | Mortality<br>Admission to hospital<br>Adverse effects leading to discontinuation<br>Viral clearance                                       |
| Reis_2, 2021<br>TOGETHER <sup>275</sup>       | Pre-print<br>NCT04727424           | 1497 | Brazil                | 41.8     | 7.4    | Chronic pulmonary disease (0.6%)<br>Asthma (1.9%)<br>Chronic cardiac disease (1.1%)<br>T1DM (3.1%)<br>T2DM (13.1%)<br>Hypertension (13.0%) | Outpatient   | NR       | NR                                        | NR                                     | fluvoxamine (100 mg twice daily for 10 days)<br>placebo                                                                 | Mortality<br>Mechanical ventilation<br>Admission to hospital<br>Viral clearance<br>Duration of hospitalization<br>Duration of ventilation |

| Study                                  | Publication status<br>Registration            | n  | Country | Mean age | % Male | Comorbidities                                                                                                   | Type of care | Severity               | % Mechanical ventilation<br>(at baseline) | Detailed ventilation (%) | Treatments (dose and duration)                                                                       | Outcomes                                                                                                                                |
|----------------------------------------|-----------------------------------------------|----|---------|----------|--------|-----------------------------------------------------------------------------------------------------------------|--------------|------------------------|-------------------------------------------|--------------------------|------------------------------------------------------------------------------------------------------|-----------------------------------------------------------------------------------------------------------------------------------------|
|                                        |                                               |    |         |          |        |                                                                                                                 |              |                        |                                           |                          |                                                                                                      | Time to symptom/clinical improvement                                                                                                    |
| Ren, 2020 <sup>276</sup>               | Peer-reviewed publication<br>ChiCTR2000029853 | 20 | China   | 52       | 60     | Copd (0.0%)<br>Cardiovascular disease (5.0%)<br>Diabetes (5.0%)<br>Hypertension (5.0%)                          | Inpatient    | Mild/Moderate (100.0%) | 0                                         | Niv or iv (0.0%)         | azvudine (5 mg once daily until discharge) standard care                                             | Mortality<br>Adverse effects leading to discontinuation<br>Viral clearance<br>Duration of hospitalization<br>Time to to viral clearance |
| Resende, 2021<br>BISHOP <sup>277</sup> | Pre-print<br>RBR-5vpyh4                       | 50 | Brazil  | 54       | 52     | Copd (0.0%)<br>Pneumopathy (10.0%)<br>Cardiopathy (8.0%)<br>Congestive heart failure (0.0%)<br>Diabetes (34.0%) | Inpatient    | Severe (100%)          | NR                                        | NR                       | secukinumab (300 mg at day-0 . A second dose of 300 mg could be administered at day 7) standard care | Mortality<br>Mechanical ventilation<br>Duration of hospitalization<br>ICU length of stay<br>Ventilator-free days                        |

| Study                                   | Publication status<br>Registration                   | n   | Country | Mean age | % Male | Comorbidities                                                                                                                                   | Type of care | Severity               | % Mechanical ventilation<br>(at baseline) | Detailed ventilation (%)                                                        | Treatments (dose and duration)                                                                                       | Outcomes                                                                                            |
|-----------------------------------------|------------------------------------------------------|-----|---------|----------|--------|-------------------------------------------------------------------------------------------------------------------------------------------------|--------------|------------------------|-------------------------------------------|---------------------------------------------------------------------------------|----------------------------------------------------------------------------------------------------------------------|-----------------------------------------------------------------------------------------------------|
|                                         |                                                      |     |         |          |        | Hypertension (48.0%)                                                                                                                            |              |                        |                                           |                                                                                 |                                                                                                                      | Duration of ventilation                                                                             |
| Rocco, 2020 <sup>278</sup>              | Peer-reviewed publication<br>RBR-4nr86m, NCT04552483 | 475 | Brazil  | 37       | 46.9   | Severe respiratory disease, bacterial pneumonia, tuberculosis, severe copd (0.0%)<br>Severe heart disease (0.0%)<br>Severe heart failure (0.0%) | Outpatient   | Mild/Moderate (100.0%) | 0                                         | Supplemental oxygen, niv, or iv (0.0%)                                          | nitazoxanide (500 mg three times daily for 5 days)<br>placebo                                                        | Mortality<br>Admission to hospital<br>Adverse effects leading to discontinuation<br>Viral clearance |
| Rodrigues, 2021 <sup>279</sup>          | Peer-reviewed publication                            | 84  | Brazil  | 36.5     | 59.5   | NR                                                                                                                                              | Outpatient   | NR                     | NR                                        | NR                                                                              | azithromycin (250 mg daily for 5 days)<br>hydroxychloroquine (two 200 mg capsules twice daily for 7 days)<br>placebo | Mortality<br>Admission to hospital<br>Viral clearance                                               |
| Rodriguez-Fortunez, 2021 <sup>280</sup> | Published<br>NCT04348383                             | 0   | Spain   | 58.1     | 80     | NR                                                                                                                                              | Inpatient    | Severe (100%)          | 100                                       | Hfo, or niv, oxygen by mask or nasal prongs (80.0%)<br>Ecmo, iv or both (20.0%) | defibrotide (25 mg/ kg/ day 24 hours continuous infusion for 15 days)<br>placebo                                     | NR                                                                                                  |

| Study                                   | Publication status<br>Registration                | n   | Country                                                                                    | Mean age | % Male | Comorbidities                                                                                                 | Type of care                        | Severity               | % Mechanical ventilation (at baseline) | Detailed ventilation (%)               | Treatments (dose and duration)                                                | Outcomes                                                                                                                                            |
|-----------------------------------------|---------------------------------------------------|-----|--------------------------------------------------------------------------------------------|----------|--------|---------------------------------------------------------------------------------------------------------------|-------------------------------------|------------------------|----------------------------------------|----------------------------------------|-------------------------------------------------------------------------------|-----------------------------------------------------------------------------------------------------------------------------------------------------|
| Roostaei Firozabad, 2021 <sup>281</sup> | Peer-reviewed publication<br>IRCT20190810044500N7 | 52  | Iran                                                                                       | 36.7     | 60     | Asthma (4.0%)<br>Cardiovascular disease (2.0%)<br>Diabetes (8.0%)<br>Hypertension (6.0%)                      | Outpatient                          | NR                     | NR                                     | NR                                     | levamisole (50 mg three times daily for 3 days)<br>placebo                    | Mortality<br>Admission to hospital<br>Adverse effects leading to discontinuation<br>Duration of hospitalization                                     |
| Roozbeh, 2020 <sup>282</sup>            | Peer-reviewed publication<br>IRCT20200403046926N1 | 60  | Iran                                                                                       | 43       | 47.3   | Cardiovascular disease (0.0%)                                                                                 | Outpatient                          | Mild/Moderate (100.0%) | 0                                      | Supplemental oxygen, niv, or iv (0.0%) | sofosbuvir-daclatasvir (400 mg/60 mg for 7 days)<br>standard care             | Admission to hospital                                                                                                                               |
| Rosas, 2021<br>COVACTA <sup>283</sup>   | Published<br>NCT04320615                          | 452 | Canada, Denmark, France, Germany, Italy, Netherlands, Spain, United Kingdom, United States | 60.8     | 69.9   | Chronic lung disease (16.2%)<br>Cardiovascular impairment (28.1%)<br>Diabetes (38.1%)<br>Hypertension (62.1%) | Inpatient<br>Intensive care (56.4%) | Severe (100%)          | 37.7                                   | Unspecified ventilation (37.7%)        | tocilizumab (8 mg/kg, maximum 800 mg, up to two times in 24 hours)<br>placebo | Adverse effects leading to discontinuation<br>Duration of hospitalization<br>ICU length of stay<br>Ventilator-free days<br>Time to symptom/clinical |

| Study                                    | Publication status<br>Registration | n   | Country                    | Mean age | % Male | Comorbidities | Type of care | Severity                         | % Mechanical ventilation (at baseline) | Detailed ventilation (%)    | Treatments (dose and duration)                                                                                                                               | Outcomes                                                                                                                 |
|------------------------------------------|------------------------------------|-----|----------------------------|----------|--------|---------------|--------------|----------------------------------|----------------------------------------|-----------------------------|--------------------------------------------------------------------------------------------------------------------------------------------------------------|--------------------------------------------------------------------------------------------------------------------------|
|                                          |                                    |     |                            |          |        |               |              |                                  |                                        |                             |                                                                                                                                                              | improvement                                                                                                              |
| Rossignol, 2021 <sup>284</sup>           | Pre-print<br>NCT04486313           | 935 | United States, Puerto Rico | 40.3     | 43.5   | NR            | Outpatient   | Mild/Moderate (99.699999999999%) | NR                                     | Supplemental oxygen (0.0%)  | nitazoxanide (300 mg twice daily for five days)<br>placebo                                                                                                   | Mortality<br>Admission to hospital<br>Adverse effects leading to discontinuation<br>Time to symptom/clinical improvement |
| Rutgers, 2021<br>PreToVid <sup>285</sup> | Pre-print<br>NL8504                | 354 | Netherlands                | 66.5     | 67     | NR            | Inpatient    | Severe (100%)                    | NR                                     | Supplemental oxygen (96.6%) | tocilizumab (single dose of 8 mg/kg of body weight intravenously or 800mg max, second dose permitted after 8 hours if hypoxia not resolved)<br>standard care | Mechanical ventilation<br>Duration of hospitalization<br>ICU length of stay<br>Duration of ventilation                   |

| Study                            | Publication status<br>Registration       | n   | Country | Mean age | % Male | Comorbidities                                                                                                                                         | Type of care                        | Severity               | % Mechanical ventilation (at baseline) | Detailed ventilation (%)                                                                                     | Treatments (dose and duration)                                                                                                                       | Outcomes                                                                                                                                                                            |
|----------------------------------|------------------------------------------|-----|---------|----------|--------|-------------------------------------------------------------------------------------------------------------------------------------------------------|-------------------------------------|------------------------|----------------------------------------|--------------------------------------------------------------------------------------------------------------|------------------------------------------------------------------------------------------------------------------------------------------------------|-------------------------------------------------------------------------------------------------------------------------------------------------------------------------------------|
| Ruzhentsova, 2020 <sup>286</sup> | Pre-print<br>NCT04501783                 | 168 | Russia  | 41.8     | 47     | Moderate or severe chronic obstructive pulmonary disease (0.0%)<br>Asthma (0.0%)<br>Severe chronic cardiovascular disorders (0.0%)<br>Diabetes (0.0%) | Inpatient (24.4%)                   | Mild/Moderate (100.0%) | NR                                     | Supplemental oxygen (1.8%)                                                                                   | favipiravir (800 mg twice daily for 10 days)<br>standard care                                                                                        | Mechanical ventilation<br>Admission to hospital<br>Adverse effects leading to discontinuation<br>Viral clearance<br>Time to symptom/clinical improvement<br>Time to viral clearance |
| Réa-Neto, 2021 <sup>287</sup>    | Peer-reviewed publication<br>NCT04420247 | 142 | Brazil  | 53.8     | 66.7   | Chronic lung disease (8.6%)<br>Diabetes (25.7%)<br>Hypertension (38.1%)                                                                               | Inpatient<br>Intensive care (84.5%) | Severe (100%)          | 18.1                                   | Oxygen by mask or nasal prongs (81.0%)<br>Niv (0.0%)<br>Iv (3.8%)<br>Iv and additional organ support (14.3%) | chloroquine/hydroxychloroquine (450 mg of chloroquine once daily for 5 days, or 400 mg of hydroxychloroquine once daily for 5 days)<br>standard care | Mortality<br>Mechanical ventilation<br>Adverse effects leading to discontinuation<br>Duration of hospitalization<br>ICU length of stay                                              |

| Study                                                                      | Publication status<br>Registration         | n   | Country  | Mean age | % Male | Comorbidities | Type of care | Severity                  | % Mechanical ventilation (at baseline) | Detailed ventilation (%)         | Treatments (dose and duration)                                                                  | Outcomes             |
|----------------------------------------------------------------------------|--------------------------------------------|-----|----------|----------|--------|---------------|--------------|---------------------------|----------------------------------------|----------------------------------|-------------------------------------------------------------------------------------------------|----------------------|
|                                                                            |                                            |     |          |          |        |               |              |                           |                                        |                                  |                                                                                                 | Ventilator-free days |
| SARCOVID_NC<br>T04357808,<br>2021<br>SARCOVID <sup>1</sup>                 | Meta-analysis<br>NCT04357808               | 30  | Spain    | 61.7     | 66.7   | NR            | Inpatient    | Severe<br>(100%)          | 0                                      | Mechanical ventilation<br>(0.0%) | sarilumab (400 mg single dose)<br>standard care                                                 | Mortality            |
| SARICOR_Eudr<br>aCT2020-<br>001531-27,<br>2021<br>SARICOR <sup>1 288</sup> | Meta-analysis<br>EudraCT2020-<br>001531-27 | 80  | Spain    | 59.4     | 71.2   | NR            | Inpatient    | Severe<br>(100%)          | 0                                      | Mechanical ventilation<br>(0.0%) | sarilumab (400 mg single dose)<br>sarilumab (200 mg single dose)<br>standard care               | Mortality            |
| SARTRE_Eudra<br>CT2020-<br>002037-15,<br>2021<br>SARTRE <sup>1 289</sup>   | Meta-analysis<br>EudraCT2020-<br>002037-15 | 140 | Spain    | 58.4     | 72.9   | NR            | Inpatient    | Severe<br>(100%)          | 0                                      | Mechanical ventilation<br>(0.0%) | sarilumab (200 mg to 400 mg single dose)<br>standard care                                       | Mortality            |
| SILCOR_Eudra<br>CT2020-<br>001413-20,<br>2021<br>SILCOR <sup>1</sup>       | Meta-analysis<br>EudraCT2020-<br>001413-20 | 158 | Spain    | 62       | 65.2   | NR            | Inpatient    | Severe<br>(100%)          | NR                                     | NR                               | siltuximab (11 mg/kg single dose)<br>corticosteroids<br>(methylprednisolone then dexamethasone) | Mortality            |
| STORM_NCT0<br>4345445, 2021<br>STORM <sup>1</sup>                          | Meta-analysis<br>NCT04345445               | 59  | Malaysia | 53.2     | 76.3   | NR            | Inpatient    | Mild/Moderate<br>(100.0%) | 0                                      | Mechanical ventilation<br>(0.0%) | tocilizumab (8 mg/kg single dose)<br>dexamethasone (8 mg-12 OD for 72 hours)                    | Mortality            |

| Study                                  | Publication status<br>Registration                | n   | Country                                                  | Mean age | % Male | Comorbidities                                                                                                           | Type of care                        | Severity      | % Mechanical ventilation (at baseline) | Detailed ventilation (%)       | Treatments (dose and duration)                                                                                 | Outcomes                                                                                                                       |
|----------------------------------------|---------------------------------------------------|-----|----------------------------------------------------------|----------|--------|-------------------------------------------------------------------------------------------------------------------------|-------------------------------------|---------------|----------------------------------------|--------------------------------|----------------------------------------------------------------------------------------------------------------|--------------------------------------------------------------------------------------------------------------------------------|
| Sabico, 2021 <sup>290</sup>            | Peer-reviewed publication<br>SCTR No. 20061006    | 73  | Saudi Arabia                                             | 49.7     | 49.3   | Asthma (4.3%)<br>Cardiovascular disease (5.8%)<br>Diabetes (50.7%)<br>Hypertension (55.1%)                              | NR                                  | NR            | 0                                      | Unspecified ventilation (0.0%) | vitamin D3 (5000 IU) (5000 IU once daily for 2 weeks)<br>vitamin D3 (1000 IU) (1000 IU once daily for 2 weeks) | Mortality<br>Adverse effects leading to discontinuation<br>Duration of hospitalization<br>Time to symptom/clinical improvement |
| Sadeghi, 2020 <sup>291</sup>           | Peer-reviewed publication<br>IRCT20200128046294N2 | 70  | Iran                                                     | 58       | 51.5   | Chronic pulmonary disease (22.7%)<br>Asthma (3.0%)<br>Heart failure (15.2%)<br>Diabetes (42.4%)<br>Hypertension (34.8%) | Inpatient                           | Severe (100%) | 0                                      | Iv (0.0%)                      | sofosbuvir-daclatasvir (400 mg/60 mg once daily for 14 days)<br>standard care                                  | Mortality<br>Mechanical ventilation<br>Duration of hospitalization<br>Time to symptom/clinical improvement                     |
| Salama, 2020<br>EMPACTA <sup>292</sup> | Peer-reviewed publication<br>NCT04372186          | 388 | United States, Peru, Brazil, Kenya, South Africa, Mexico | 55.9     | 59.1   | Copd (4.5%)<br>Asthma (11.4%)<br>Myocardial infarction (1.9%)<br>Atrial                                                 | Inpatient<br>Intensive care (15.4%) | Severe (100%) | 0                                      | Ventilation (0.0%)             | tocilizumab (8 mg/kg, for up to a maximum of 800 mg, in 24 hours)<br>placebo                                   | Mechanical ventilation<br>Adverse effects leading to discontinuation                                                           |

| Study                                              | Publication status<br>Registration       | n   | Country | Mean age | % Male | Comorbidities                                                                             | Type of care | Severity      | % Mechanical ventilation<br>(at baseline) | Detailed ventilation (%) | Treatments (dose and duration)                                                    | Outcomes                                                                               |
|----------------------------------------------------|------------------------------------------|-----|---------|----------|--------|-------------------------------------------------------------------------------------------|--------------|---------------|-------------------------------------------|--------------------------|-----------------------------------------------------------------------------------|----------------------------------------------------------------------------------------|
|                                                    |                                          |     |         |          |        | fibrillation (3.2%)<br>Diabetes (40.6%)<br>Hypertension (48.3%)                           |              |               |                                           |                          |                                                                                   | Duration of hospitalization<br>Time to symptom/clinical improvement                    |
| Salehzadeh, 2020 <sup>293</sup>                    | Pre-print<br>IRCT20200418047126N1        | 100 | Iran    | 56.1     | 41     | Copd (4.0%)<br>Ischemic heart disease (15.0%)<br>Diabetes (11.0%)<br>Hypertension (11.0%) | Inpatient    | NR            | NR                                        | NR                       | colchicine (1 mg/day for 6 days)<br>placebo                                       | Mortality<br>Duration of hospitalization                                               |
| Salvarani, 2020<br>RCT-TCZ-COVID-19 <sup>294</sup> | Peer-reviewed publication<br>NCT04346355 | 126 | Italy   | 60       | 61.1   | Copd (3.2%)<br>Diabetes (15.1%)<br>Hypertension (44.4%)                                   | Inpatient    | Severe (100%) | 0                                         | Niv or iv (0.0%)         | tocilizumab (8mg/kg, for up to a maximum of 800 mg, in 12 hours)<br>standard care | Mortality<br>Mechanical ventilation<br>Duration of hospitalization                     |
| Samimagham, 2021 <sup>295</sup>                    | Pre-print<br>IRCT20200509047364N2        | 20  | Iran    | 46       | 60     | NR                                                                                        | Inpatient    | NR            | NR                                        | NR                       | famotidine (160 mg four times daily until discharge up to 14 days)<br>placebo     | Mortality<br>Adverse effects leading to discontinuation<br>Duration of hospitalization |

| Study                            | Publication status<br>Registration                  | n  | Country | Mean age | % Male | Comorbidities                                                                                             | Type of care | Severity      | % Mechanical ventilation<br>(at baseline) | Detailed ventilation (%)                                                   | Treatments (dose and duration)                                                                             | Outcomes                                                                                                                                                                            |
|----------------------------------|-----------------------------------------------------|----|---------|----------|--------|-----------------------------------------------------------------------------------------------------------|--------------|---------------|-------------------------------------------|----------------------------------------------------------------------------|------------------------------------------------------------------------------------------------------------|-------------------------------------------------------------------------------------------------------------------------------------------------------------------------------------|
| Santamarina, 2021 <sup>296</sup> | Pre-print<br>NCT04489446                            | 40 | Chile   | 55.8     | 82.5   | Asthma (5.0%)<br>Copd (0.0%)<br>Diabetes (20.0%)<br>Hypertension (50.0%)                                  | Inpatient    | NR            | 27.5                                      | Ambient oxygen (32.5%)<br>Hfo (5.0%)<br>Prone position ventilation (27.5%) | sildenafil (25 mg three times daily for seven days)<br>placebo                                             | Mortality<br>Mechanical ventilation<br>Duration of hospitalization<br>ICU length of stay<br>Duration of ventilation                                                                 |
| Sayad, 2021 <sup>297</sup>       | Peer-reviewed publication<br>IRCT20130812014333N145 | 80 | Iran    | 54.1     | 55     | Pulmonary disorders (10.0%)<br>Cardiovascular disease (17.5%)<br>Diabetes (20.0%)<br>Hypertension (30.0%) | Inpatient    | Severe (100%) | NR                                        | NR                                                                         | sofosbuvir (400 mg once daily for 10 days)<br>velpatasvir (100 mg once daily for 10 days)<br>standard care | Mortality<br>Mechanical ventilation<br>Adverse effects leading to discontinuation<br>Duration of hospitalization<br>Duration of ventilation<br>Time to symptom/clinical improvement |
| Schwartz_1, 2021 <sup>298</sup>  | Data from authors<br>NCT04429711                    | 94 | Israel  | 39.5     | 80.8   | NR                                                                                                        | Outpatient   | NR            | 0                                         | Niv or iv (0.0%)                                                           | ivermectin (150 to 300 µg/kg/day for 3 days)<br>placebo                                                    | NR                                                                                                                                                                                  |

| Study                                                    | Publication status<br>Registration       | n   | Country | Mean age | % Male | Comorbidities                                              | Type of care | Severity | % Mechanical ventilation<br>(at baseline) | Detailed ventilation (%) | Treatments (dose and duration)                                | Outcomes                                                                                                                                           |
|----------------------------------------------------------|------------------------------------------|-----|---------|----------|--------|------------------------------------------------------------|--------------|----------|-------------------------------------------|--------------------------|---------------------------------------------------------------|----------------------------------------------------------------------------------------------------------------------------------------------------|
| Schwartz_2, 2021<br>ALBERTA HOPE COVID-19 <sup>299</sup> | Peer-reviewed publication<br>NCT04329611 | 148 | Canada  | 46.8     | 44.6   | Asthma (13.5%)<br>Diabetes (19.6%)<br>Hypertension (27.7%) | Outpatient   | NR       | NR                                        | NR                       | hydroxychloroquine (200 mg twice daily for 5 days)<br>placebo | Mortality<br>Mechanical ventilation<br>Admission to hospital<br>Adverse effects leading to discontinuation<br>Time to symptom/clinical improvement |
| Sedighiyan, 2021 <sup>300</sup>                          | Pre-print<br>IRCT20200511047399N1        | 39  | Iran    | 66.8     | 60     | Diabetes (100.0%)                                          | Inpatient    | NR       | NR                                        | NR                       | omega 3 (670 mg EPA and DHA for two weeks)<br>standard care   | NR                                                                                                                                                 |
| Sekhavati, 2020 <sup>301</sup>                           | Peer-reviewed publication                | 111 | Iran    | 57.1     | 46     | Cardiovascular disease (0.0%)                              | Inpatient    | NR       | NR                                        | NR                       | azithromycin (500 mg once daily for 5 days)<br>standard care  | Mortality<br>Mechanical ventilation<br>Adverse effects leading to discontinuation<br>Duration of hospitalization                                   |

| Study                                       | Publication status<br>Registration       | n   | Country       | Mean age | % Male | Comorbidities                                                                                                                                                                                                                                               | Type of care                      | Severity      | % Mechanical ventilation<br>(at baseline) | Detailed ventilation (%)                                                                                           | Treatments (dose and duration)                                                               | Outcomes                                                                    |
|---------------------------------------------|------------------------------------------|-----|---------------|----------|--------|-------------------------------------------------------------------------------------------------------------------------------------------------------------------------------------------------------------------------------------------------------------|-----------------------------------|---------------|-------------------------------------------|--------------------------------------------------------------------------------------------------------------------|----------------------------------------------------------------------------------------------|-----------------------------------------------------------------------------|
|                                             |                                          |     |               |          |        |                                                                                                                                                                                                                                                             |                                   |               |                                           |                                                                                                                    |                                                                                              | ICU length of stay                                                          |
| Self, 2020<br>ORCHID <sup>302</sup>         | Peer-reviewed publication<br>NCT04332991 | 479 | United States | 57       | 55.7   | Asthma (10.2%)<br>Copd (8.1%)<br>Chronic artery disease (8.8%)<br>Cerebrovascular disease (7.1%)<br>Congestive heart failure (7.3%)<br>Peripheral vascular disease (4.0%)<br>Prior myocardial infarction (4.4%)<br>Diabetes (34.7%)<br>Hypertension (52.8%) | Inpatient Intensive care (19.0%)  | NR            | 19.2                                      | Face mask (2.1%)<br>Standard nasal cannula (42.4%)<br>High-flow (11.1%)<br>Niv (1.5%)<br>Iv (6.7%)<br>Other (1.7%) | hydroxychloroquine (200 mg twice daily for 5 days)<br>placebo                                | Mortality<br>Mechanical ventilation<br>Time to symptom/clinical improvement |
| Sethi, 2021<br>IMPROVE COVID <sup>303</sup> | Data from authors<br>NCT04367831         | 94  | United States | NR       | NR     | NR                                                                                                                                                                                                                                                          | Inpatient Intensive care (100.0%) | Severe (100%) | NR                                        | NR                                                                                                                 | prophylactic anticoagulation (If eGFR ≥30 mL/min :<br>BMI < 40 kg/m2:<br>Enoxaparin 40 mg SC | Mortality<br>Venous thromboembolism<br>Clinically                           |

| Study | Publication status<br>Registration | n | Country | Mean age | % Male | Comorbidities | Type of care | Severity | % Mechanical ventilation (at baseline) | Detailed ventilation (%) | Treatments (dose and duration)                                                                                                                                                                                                                                                                                                                                                                                                                                                                                                                                                     | Outcomes           |
|-------|------------------------------------|---|---------|----------|--------|---------------|--------------|----------|----------------------------------------|--------------------------|------------------------------------------------------------------------------------------------------------------------------------------------------------------------------------------------------------------------------------------------------------------------------------------------------------------------------------------------------------------------------------------------------------------------------------------------------------------------------------------------------------------------------------------------------------------------------------|--------------------|
|       |                                    |   |         |          |        |               |              |          |                                        |                          | daily. BMI 40 - 50 kg/m2: Enoxaparin 40 mg SC twice a day. BMI > 50 kg/m2: Enoxaparin 60 mg SC twice a day If eGFR < 30 mL/min or acute kidney injury: 50-120 kg: Unfractionated heparin 5000 units SC q8h >120 kg: Unfractionated heparin 7500 units SC q8h If CRRT: Unfractionated heparin infusion pre-filter at 500 units/hour) intermediate-dose anticoagulation (If eGFR ≥30 mL/min: enoxaparin 1mg/kg SC daily or unfractionated heparin infusion at 10 units/kg/hour. If eGFR <30 mL/min or acute kidney injury or CRRT: unfractionated heparin infusion at 10units/kg/hr) | important bleeding |

| Study                                   | Publication status<br>Registration           | n   | Country                                                                               | Mean age | % Male | Comorbidities                                                                                                                                                                                           | Type of care | Severity               | % Mechanical ventilation<br>(at baseline) | Detailed ventilation (%)       | Treatments (dose and duration)                                                         | Outcomes                                                                                                                  |
|-----------------------------------------|----------------------------------------------|-----|---------------------------------------------------------------------------------------|----------|--------|---------------------------------------------------------------------------------------------------------------------------------------------------------------------------------------------------------|--------------|------------------------|-------------------------------------------|--------------------------------|----------------------------------------------------------------------------------------|---------------------------------------------------------------------------------------------------------------------------|
| Shinkai, 2021 <sup>304</sup>            | Peer-reviewed publication<br>JapicCTI-205238 | 156 | Japan                                                                                 | 45.3     | 66.7   | NR                                                                                                                                                                                                      | Inpatient    | Mild/Moderate (100.0%) | 0                                         | Unspecified ventilation (0.0%) | favipiravir (800 mg twice daily for 14 days)<br>placebo                                | Mortality<br>Mechanical ventilation<br>Adverse effects leading to discontinuation<br>Time to symptom/clinical improvement |
| Sholzberg, 2021<br>RAPID <sup>305</sup> | Pre-print<br>NCT04362085, NCT04444700        | 465 | Brazil, Canada, Ireland, Saudi Arabia, United Arab Emirates, United States of America | 60       | 56.8   | Chronic pulmonary disease (13.6%)<br>Coronary artery disease (7.3%)<br>Heart failure (3.2%)<br>Atrial fibrillation (0.4%)<br>Cerebrovascular disease (4.1%)<br>Diabetes (34.4%)<br>Hypertension (48.4%) | Inpatient    | Mild/Moderate (100.0%) | 0                                         | Niv, iv (0.0%)                 | therapeutic heparin (administered up to hospital discharge or day 28)<br>standard care | Mortality<br>Mechanical ventilation<br>Venous thromboembolism<br>Clinically important bleeding<br>Ventilator-free days    |

| Study                                             | Publication status<br>Registration                | n   | Country   | Mean age | % Male | Comorbidities                                                                                                     | Type of care                        | Severity               | % Mechanical ventilation (at baseline) | Detailed ventilation (%)               | Treatments (dose and duration)                                                                                | Outcomes                                                            |
|---------------------------------------------------|---------------------------------------------------|-----|-----------|----------|--------|-------------------------------------------------------------------------------------------------------------------|-------------------------------------|------------------------|----------------------------------------|----------------------------------------|---------------------------------------------------------------------------------------------------------------|---------------------------------------------------------------------|
| Shrivastava, 2021 <sup>306</sup>                  | Peer-reviewed publication<br>:CTRI/2020/11/029388 | 214 | India     | NR       | NR     | NR                                                                                                                | Outpatient                          | NR                     | NR                                     | NR                                     | Covispray (2–3 sprays in each nostril, 4–5 times per day for 14 days)<br>standard care                        | Admission to hospital<br>Adverse effects leading to discontinuation |
| Siarni, 2021 <sup>307</sup>                       | Peer-reviewed publication                         | 120 | Iran      | NR       | NR     | Respiratory condition (0.0%)                                                                                      | Inpatient (74.2%)                   | NR                     | NR                                     | NR                                     | ammonium chloride (125 mg in 5 ml three times daily for 7 days)<br>placebo                                    | Mortality<br>Mechanical ventilation<br>Duration of hospitalization  |
| Sigamani, 2020 <sup>308</sup>                     | Peer-reviewed publication<br>NCT04512027          | 10  | India     | 28.8     | 20     | Diabetes (0.0%)                                                                                                   | Inpatient                           | Mild/Moderate (100.0%) | 0                                      | Supplemental oxygen, niv, or iv (0.0%) | prolectin-M (40 g/day for 5 days)<br>standard care                                                            | Viral clearance                                                     |
| Silva Borba, 2020<br>CloroCovid-19 <sup>309</sup> | Peer-reviewed publication<br>NCT04323527          | 81  | Brazil    | 51.1     | 75.3   | Asthma (7.4%)<br>Tuberculosis (3.6%)<br>Cardiovascular disease (9.1%)<br>Diabetes (25.5%)<br>Hypertension (45.5%) | Inpatient<br>Intensive care (45.7%) | Severe (100%)          | NR                                     | Supplemental oxygen (88.9%)            | chloroquine (600 mg BID) (600 mg twice daily for 10 days)<br>chloroquine (450 mg BID) (450 mg/day for 5 days) | Mortality                                                           |
| Silva, 2021 <sup>310</sup>                        | Pre-print<br>NCT04463264                          | 46  | Argentina | 45.9     | 72.2   | NR                                                                                                                | Inpatient (69.4%)                   | Mild/Moderate (94.4%)  | 0                                      | Unspecified ventilation (0.0%)         | nitazoxanide (500 mg four times a day for 14 days)<br>placebo                                                 | Mortality<br>Adverse effects leading to discontinuation             |

| Study                                           | Publication status<br>Registration | n  | Country                          | Mean age | % Male | Comorbidities                                                                                             | Type of care | Severity      | % Mechanical ventilation<br>(at baseline) | Detailed ventilation (%)       | Treatments (dose and duration)                                                                                                                                                                                                                               | Outcomes                                                                                                         |
|-------------------------------------------------|------------------------------------|----|----------------------------------|----------|--------|-----------------------------------------------------------------------------------------------------------|--------------|---------------|-------------------------------------------|--------------------------------|--------------------------------------------------------------------------------------------------------------------------------------------------------------------------------------------------------------------------------------------------------------|------------------------------------------------------------------------------------------------------------------|
|                                                 |                                    |    |                                  |          |        |                                                                                                           |              |               |                                           |                                |                                                                                                                                                                                                                                                              | Viral clearance                                                                                                  |
| Singh_1, 2021 <sup>311</sup>                    | Pre-print<br>NCT04402866           | 25 | United Kingdom, Moldova, Ukraine | 57.3     | 68     | Diabetes (40.0%)<br>Hypertension (68.0%)                                                                  | Inpatient    | Severe (100%) | NR                                        | Supplemental oxygen (100.0%)   | inhaled pan-JAK inhibitor (TD-0903) (1 mg) (1 mg once daily for up to 7 days)<br>inhaled pan-JAK inhibitor (TD-0903) (3 mg) (3 mg once daily for up to 7 days)<br>inhaled pan-JAK inhibitor (TD-0903) (10 mg) (10 mg once daily for up to 7 days)<br>placebo | Mortality<br>Mechanical ventilation<br>Adverse effects leading to discontinuation<br>Duration of hospitalization |
| Singh_2, 2021<br>SEV COVID Trial <sup>312</sup> | Pre-print<br>CTRI/2020/06/025575   | 40 | India                            | 43.3     | 78.8   | Copd (6.1%)<br>Asthma (0.0%)<br>Chronic cardiac disease (6.1%)<br>Diabetes (15.2%)<br>Hypertension (6.1%) | Inpatient    | NR            | NR                                        | Oxygen supplementation (15.2%) | hydroxychloroquine (400 mg of hydroxychloroquine once daily, and 600 mg of ribavirin twice daily, for 10 days) rivabirin ( ) standard care                                                                                                                   | Mortality<br>Mechanical ventilation<br>Duration of hospitalization<br>Time to to viral clearance                 |
| Singh_3, 2021<br>SEV COVID Trial <sup>312</sup> | Pre-print<br>CTRI/2020/06/025575   | 71 | India                            | 53.2     | 72     | Copd (8.8%)<br>Ashtma (2.9%)<br>Chronic cardiac disease (14.7%)<br>Diabetes                               | Inpatient    | Severe (100%) | NR                                        | Oxygen supplementation (75.0%) | hydroxychloroquine (400 mg of hydroxychloroquine once daily, and 600 mg of ribavirin twice daily, for 10 days) ribavirin ( ) lopinavir-ritonavir (two                                                                                                        | Mortality<br>Mechanical ventilation<br>Adverse effects leading to discontinuati                                  |

| Study                                          | Publication status<br>Registration       | n   | Country       | Mean age | % Male | Comorbidities                                                                                                                                                                                      | Type of care | Severity                                  | % Mechanical ventilation (at baseline) | Detailed ventilation (%)                                       | Treatments (dose and duration)                                                                                                                                                                        | Outcomes                                                                                                         |
|------------------------------------------------|------------------------------------------|-----|---------------|----------|--------|----------------------------------------------------------------------------------------------------------------------------------------------------------------------------------------------------|--------------|-------------------------------------------|----------------------------------------|----------------------------------------------------------------|-------------------------------------------------------------------------------------------------------------------------------------------------------------------------------------------------------|------------------------------------------------------------------------------------------------------------------|
|                                                |                                          |     |               |          |        | (33.8%) Hypertension (45.6%)                                                                                                                                                                       |              |                                           |                                        |                                                                | 200 mg/50 mg lopinavir-ritonavir tablets twice daily for 10 days) ribavirin ( ) standard care                                                                                                         | on Duration of hospitalization<br>Time to to viral clearance                                                     |
| Sivapalan, 2021<br>ProPAC-COVID <sup>313</sup> | Peer-reviewed publication<br>NCT04322396 | 117 | Denmark       | 65.6     | 55.6   | Asthma (22.2%)<br>Copd (8.6%)<br>Bronchiectasis (3.4%)<br>Previous myocardial infarction (5.1%)<br>Heart failure (6.8%)<br>Atrial fibrillation (17.9%)<br>Diabetes (23.9%)<br>Hypertension (38.5%) | Inpatient    | Severe (100%)                             | 59                                     | Unspecified ventilation (59.0%)                                | azithromycin (500 mg once daily on days 1 to 3 then 250 mg once daily for days 4 to 15)<br>hydroxychloroquine (200 mg twice daily on days 1 to 3 then 200 mg twice daily for days 4 to 15)<br>placebo | Mortality<br>Mechanical ventilation<br>Adverse effects leading to discontinuation<br>Duration of hospitalization |
| Sivapalasingam_P2, 2021<br>Sarilumab-COVID-19  | Pre-print<br>NCT04315298                 | 457 | United States | 58.7     | 72.4   | Tuberculosis (0.0%)<br>Diabetes (21.4%)<br>Hypertension (46.4%)                                                                                                                                    | Inpatient    | Severe (100%)<br>Severe: Critical (49.5%) | 49.5                                   | Low-flow supplemental oxygen (27.6%)<br>High-flow oxygen, niv, | sarilumab (200 mg) (200 mg given intravenously over 1 hour)<br>sarilumab (400 mg) (400 mg given intravenously over 1                                                                                  | Adverse effects leading to discontinuation                                                                       |

| Study                                                                    | Publication status<br>Registration       | n    | Country       | Mean age | % Male | Comorbidities                                                                         | Type of care | Severity                                   | % Mechanical ventilation<br>(at baseline) | Detailed ventilation (%)                           | Treatments (dose and duration)                                                                                                        | Outcomes                                                             |
|--------------------------------------------------------------------------|------------------------------------------|------|---------------|----------|--------|---------------------------------------------------------------------------------------|--------------|--------------------------------------------|-------------------------------------------|----------------------------------------------------|---------------------------------------------------------------------------------------------------------------------------------------|----------------------------------------------------------------------|
|                                                                          |                                          |      |               |          |        |                                                                                       |              |                                            |                                           | and/or iv (49.5%)                                  | hour) placebo                                                                                                                         |                                                                      |
| Sivapalasingam_P3_C1, 2021<br>Sarilumab-COVID-19 <sup>314</sup>          | Pre-print<br>NCT04315298                 | 1365 | United States | 61.7     | 64.5   | Tuberculosis (0.0%)<br>Diabetes (19.0%)<br>Hypertension (52.7%)                       | Inpatient    | Severe (100%)<br>Severe: Critical (55.0%)  | 21.8                                      | Low-flow supplemental oxygen (27.0%)<br>Iv (21.8%) | sarilumab (200 mg) (200 mg given intravenously over 1 hour)<br>sarilumab (400 mg) (400 mg given intravenously over 1 hour)<br>placebo | Adverse effects leading to discontinuation                           |
| Sivapalasingam_P3_C2_Critical, 2021<br>Sarilumab-COVID-19 <sup>314</sup> | Pre-print<br>NCT04315298                 | 31   | United States | 48.7     | 71     | Tuberculosis (0.0%)<br>Diabetes (29.0%)<br>Hypertension (41.9%)                       | Inpatient    | Severe (100%)<br>Severe: Critical (100.0%) | 100                                       | Iv (100.0%)                                        | sarilumab (800 mg) (800 mg given intravenously over 1 hour)<br>placebo                                                                | Mortality<br>Adverse effects leading to discontinuation              |
| Sivapalasingam_P3_C3_Critical, 2021<br>Sarilumab-COVID-19 <sup>314</sup> | Pre-print<br>NCT04315298                 | 8    | United States | 60.8     | 62.5   | Tuberculosis (0.0%)<br>Diabetes (37.5%)<br>Hypertension (62.5%)                       | Inpatient    | Severe (100%)<br>Severe: Critical (100.0%) | 100                                       | Niv or high-flow oxygen (100.0%)<br>Iv (0.0%)      | sarilumab (800 mg) (800 mg given intravenously over 1 hour)<br>placebo                                                                | Mortality<br>Adverse effects leading to discontinuation              |
| Skendelas, 2021 <sup>315</sup>                                           | Peer-reviewed publication<br>NCT04343651 | 4    | United States | 63.5     | 50     | Single-lung transplant (100.0%)<br>Severe chronic respiratory disease and requirement | NR           | NR                                         | NR                                        | NR                                                 | leronlimab (1-2 weekly 700 mg subcutaneous doses)<br>placebo                                                                          | Mechanical ventilation<br>Adverse effects leading to discontinuation |

| Study                                   | Publication status<br>Registration       | n   | Country               | Mean age | % Male | Comorbidities                                                                                                             | Type of care | Severity               | % Mechanical ventilation<br>(at baseline) | Detailed ventilation (%)                                | Treatments (dose and duration)                                                                                                                                           | Outcomes                                                                                                     |
|-----------------------------------------|------------------------------------------|-----|-----------------------|----------|--------|---------------------------------------------------------------------------------------------------------------------------|--------------|------------------------|-------------------------------------------|---------------------------------------------------------|--------------------------------------------------------------------------------------------------------------------------------------------------------------------------|--------------------------------------------------------------------------------------------------------------|
|                                         |                                          |     |                       |          |        | for long-term oxygen therapy (0.0%)                                                                                       |              |                        |                                           |                                                         |                                                                                                                                                                          |                                                                                                              |
| Skipper, 2020 <sup>316</sup>            | Peer-reviewed publication<br>NCT04308668 | 491 | United States, Canada | 40       | 45.8   | Asthma (10.4%)<br>Chronic lung disease (0.4%)<br>Cardiovascular disease (1.2%)<br>Diabetes (3.9%)<br>Hypertension (11.0%) | Outpatient   | Mild/Moderate (100.0%) | 0                                         | Supplemental oxygen, niv, or iv (0.0%)                  | hydroxychloroquine (600 mg once daily for 5 days)<br>placebo                                                                                                             | Mortality<br>Admission to hospital                                                                           |
| Sobngwi, 2021<br>DOXYCOV <sup>317</sup> | Pre-print<br>NCT04715295                 | 194 | Cameroon              | 38.5     | 52.4   | Asthma (1.6%)<br>Severe cardiac disease (0.0%)<br>Treated hypertension (1.1%)                                             | Outpatient   | Mild/Moderate (100.0%) | NR                                        | NR                                                      | doxycycline (Doxycycline 100mg twice daily for 7 days)<br>azithromycin (500 mg at day 1 and 250 mg from day 2 through 5)<br>hydroxychloroquine (400 mg daily for 5 days) | Admission to hospital<br>Adverse effects leading to discontinuation<br>Viral clearance                       |
| Soin, 2021<br>COVINTOC <sup>318</sup>   | Published<br>CTRI/2020/05/025369         | 180 | India                 | 55       | 84.9   | Copd (2.2%)<br>Respiratory, thoracic, and mediastinal disorders (3.9%)<br>Cardiac disorders (15.1%)                       | Inpatient    | Mild/Moderate (49.2%)  | 31.9                                      | Supplemental oxygen (89.9%)<br>Niv (26.8%)<br>Iv (5.0%) | tocilizumab (6 mg/kg, up to a maximum dose of 480 mg, single dose)<br>standard care                                                                                      | Mortality<br>Mechanical ventilation<br>ICU length of stay<br>Ventilator-free days<br>Duration of ventilation |

| Study                                     | Publication status<br>Registration                                   | n   | Country | Mean age | % Male | Comorbidities                                                                                                              | Type of care | Severity      | % Mechanical ventilation (at baseline) | Detailed ventilation (%)                          | Treatments (dose and duration)                                                                                                                                                                       | Outcomes                                                                                                                              |
|-------------------------------------------|----------------------------------------------------------------------|-----|---------|----------|--------|----------------------------------------------------------------------------------------------------------------------------|--------------|---------------|----------------------------------------|---------------------------------------------------|------------------------------------------------------------------------------------------------------------------------------------------------------------------------------------------------------|---------------------------------------------------------------------------------------------------------------------------------------|
|                                           |                                                                      |     |         |          |        | Diabetes (41.3%)<br>Hypertension (39.1%)                                                                                   |              |               |                                        |                                                   |                                                                                                                                                                                                      | Time to symptom/clinical improvement                                                                                                  |
| Solanich, 2021<br>TACROVID <sup>319</sup> | Peer-reviewed publication<br>NCT04341038<br>/EudraCT: 2020-001445-39 | 55  | Spain   | 63.2     | 80     | Coronary heart disease (7.3%)<br>Diabetes (27.3%)<br>Hypertension (43.6%)                                                  | Inpatient    | Severe (100%) | 29.1                                   | Supplemental oxygen (70.9%)<br>Niv or hfo (29.1%) | methylprednisolone (120 mg of methylprednisolone pulse daily on three consecutive days, 0.05 mg/kg of tacrolimus twice daily until blood trough levels of 8 - 10 ng/mL) tacrolimus ( ) standard care | Mortality<br>Mechanical ventilation<br>Duration of hospitalization<br>Duration of ventilation<br>Time to symptom/clinical improvement |
| Solaymani-Dodaran, 2021 <sup>320</sup>    | Peer-reviewed publication<br>IRCT20200318046812N1                    | 380 | Iran    | 57.6     | 55     | Chronic lung disease (3.5%)<br>Asthma (3.8%)<br>Cardiovascular disease (10.7%)<br>Diabetes (25.7%)<br>Hypertension (34.9%) | Inpatient    | Severe (100%) | NR                                     | NR                                                | favipiravir (600 mg three times a day for 7 days)<br>lopinavir-ritonavir (100 mg and 400 mg twice a day for 7 days)                                                                                  | Mortality<br>Mechanical ventilation<br>Duration of hospitalization<br>Time to symptom/clinical improvement                            |

| Study                                    | Publication status<br>Registration       | n   | Country                                                                                              | Mean age | % Male | Comorbidities                                                                                                              | Type of care | Severity               | % Mechanical ventilation (at baseline) | Detailed ventilation (%)                               | Treatments (dose and duration)                                                                                              | Outcomes                                                                                                                                |
|------------------------------------------|------------------------------------------|-----|------------------------------------------------------------------------------------------------------|----------|--------|----------------------------------------------------------------------------------------------------------------------------|--------------|------------------------|----------------------------------------|--------------------------------------------------------|-----------------------------------------------------------------------------------------------------------------------------|-----------------------------------------------------------------------------------------------------------------------------------------|
| Song, 2021 <sup>321</sup>                | Peer-reviewed publication<br>NCT04330586 | 61  | South Korea                                                                                          | 46.6     | 32.8   | Chronic airway diseases:<br>asthma and chronic obstructive lung disease (0.0%)<br>Diabetes (14.8%)<br>Hypertension (27.9%) | Inpatient    | NR                     | NR                                     | NR                                                     | ciclesonide (320 ug inhalation twice per day for 14 days)<br>standard care                                                  | Mortality<br>Adverse effects leading to discontinuation<br>Viral clearance<br>Duration of hospitalization                               |
| Song_2, 2021<br>SAC-COVID <sup>322</sup> | Pre-print<br>NCT04317040                 | 22  | United States                                                                                        | 58       | 63.6   | Copd/asthma (9.1%)<br>Heart disease (31.8%)<br>Diabetes (31.8%)<br>Hypertension (50.0%)                                    | Inpatient    | Severe (100%)          | NR                                     | Supplemental oxygen (100.0%)<br>Mv (0.0%)              | CD24Fc antibody (480 mg IV infusion single dose)<br>placebo                                                                 | Duration of hospitalization                                                                                                             |
| Spinner, 2020 <sup>323</sup>             | Peer-reviewed publication<br>NCT04292730 | 596 | France, Germany, Hong Kong, Italy, Netherlands, Korea, Singapore, Spain, Switzerland, Taiwan, United | 57       | 61.1   | Asthma (13.9%)<br>Cardiovascular disease (56.3%)<br>Diabetes (39.7%)<br>Hypertension (42.5%)                               | Inpatient    | Mild/Moderate (100.0%) | 0.9                                    | Supplemental oxygen (15.1%)<br>High-flow or niv (0.9%) | remdesivir (10 days) (100 mg once daily for 10 days)<br>remdesivir (5 days) (100 mg once daily for 5 days)<br>standard care | Mortality<br>Mechanical ventilation<br>Adverse effects leading to discontinuation<br>Duration of hospitalization<br>Time to symptom/cli |

| Study                                                    | Publication status<br>Registration | n   | Country                | Mean age | % Male | Comorbidities | Type of care                         | Severity                                   | % Mechanical ventilation (at baseline) | Detailed ventilation (%)                                                                                                              | Treatments (dose and duration)                                                                                                                                                                                                                                                                                     | Outcomes                                                                                       |
|----------------------------------------------------------|------------------------------------|-----|------------------------|----------|--------|---------------|--------------------------------------|--------------------------------------------|----------------------------------------|---------------------------------------------------------------------------------------------------------------------------------------|--------------------------------------------------------------------------------------------------------------------------------------------------------------------------------------------------------------------------------------------------------------------------------------------------------------------|------------------------------------------------------------------------------------------------|
|                                                          |                                    |     | Kingdom, United States |          |        |               |                                      |                                            |                                        |                                                                                                                                       |                                                                                                                                                                                                                                                                                                                    | nical improvement                                                                              |
| Spyropoulos, 2021<br>HEP-COVID <sup>324</sup>            | conference abstract<br>NCT04401293 | 257 | United States          | NR       | NR     | NR            | Inpatient                            | Severe (100%)                              | 20.6                                   | Nasal cannular (64.4%)<br>Non-rebreather (9.1%)<br>Venti mask (2.4%)<br>Hfnc or niv (15.4%)<br>Invasive mechanical ventilation (5.1%) | full-dose anticoagulant (enoxaparin 1mg/kg subcut bid for creatinine clearance => 30 ml/min or 0.5 mg/kg subcut bid for creatinine clearance 15-29 ml/min)<br>intermediate-dose anticoagulant (unfractionated heparin up to 22,500 IU daily or enoxaparin 30 mg qid or 40 mg bid or dalteparin 5000 units per day) | Mortality<br>Mechanical ventilation<br>Venous thromboembolism<br>Clinically important bleeding |
| Sterne_NCT04244591, 2020<br>Steroids-SARI <sup>325</sup> | Meta-analysis<br>NCT04244591       | 47  | China                  | 64.5     | 74.5   | NR            | Inpatient<br>Intensive care (100.0%) | Severe (100%)<br>Severe: Critical (100.0%) | 57.5                                   | Mechanical ventilation (57.5%)                                                                                                        | methylprednisolone (40 mg twice daily for 5 days)<br>standard care                                                                                                                                                                                                                                                 | Mortality                                                                                      |
| Sterne_NCT04325061, 2020<br>DEXA-COVID 19 <sup>325</sup> | Meta-analysis<br>NCT04325061       | 19  | Spain                  | 60.7     | 68.4   | NR            | NR                                   | Severe (100%)<br>Severe:                   | 100                                    | iv (100.0%)                                                                                                                           | dexamethasone (20 mg once daily for 5 days, then 10 mg once                                                                                                                                                                                                                                                        | Mortality                                                                                      |

| 147                                |                                          |     |               |          |        |                                                                                                                                  |                                    |                                                                    |                                        |                                                                         |                                                                      |                                                                                                                                                 |
|------------------------------------|------------------------------------------|-----|---------------|----------|--------|----------------------------------------------------------------------------------------------------------------------------------|------------------------------------|--------------------------------------------------------------------|----------------------------------------|-------------------------------------------------------------------------|----------------------------------------------------------------------|-------------------------------------------------------------------------------------------------------------------------------------------------|
| Study                              | Publication status<br>Registration       | n   | Country       | Mean age | % Male | Comorbidities                                                                                                                    | Type of care                       | Severity                                                           | % Mechanical ventilation (at baseline) | Detailed ventilation (%)                                                | Treatments (dose and duration)                                       | Outcomes                                                                                                                                        |
|                                    |                                          |     |               |          |        |                                                                                                                                  |                                    | Critical (100.0%)                                                  |                                        |                                                                         | daily for 5 days) standard care                                      |                                                                                                                                                 |
| Stone, 2020<br>BACC <sup>326</sup> | Peer-reviewed publication<br>NCT04356937 | 243 | United States | 59.9     | 58     | Copd (9.1%)<br>Asthma (9.1%)<br>Heart failure (9.9%)<br>Myocardial infarction (8.6%)<br>Diabetes (30.9%)<br>Hypertension (48.6%) | Inpatient<br>Intensive care (4.5%) | Severe (100%)                                                      | 4.5                                    | Supplemental oxygen (79.8%)<br>High-flow or niv (4.1%)<br>lv (0.4%)     | tocilizumab (8mg/kg, for up to a maximum of 800 mg, once)<br>placebo | Mortality<br>Mechanical ventilation<br>Duration of hospitalization<br>Duration of ventilation<br>Time to symptom/clinical improvement           |
| Strich, 2021 <sup>327</sup>        | Peer-reviewed publication<br>NCT04579393 | 59  | United States | 55.6     | 79.7   | Asthma (11.9%)<br>Coronary artery disease (13.6%)<br>Diabetes (37.3%)<br>Hypertension (54.2%)                                    | Inpatient                          | Mild/Moderate (39.0%)<br>Severe (61.0%)<br>Severe: Critical (6.8%) | 61                                     | Supplementary oxygen (39.0%)<br>Niv or hfo (54.2%)<br>lv or ecmo (6.8%) | fostamatinib (150 mg twice daily for 14 days)<br>placebo             | Mortality<br>Mechanical ventilation<br>Adverse effects leading to discontinuation<br>ICU length of stay<br>Time to symptom/clinical improvement |

| Study                                                       | Publication status<br>Registration                  | n   | Country                    | Mean age | % Male | Comorbidities                                                                       | Type of care                         | Severity                                   | % Mechanical ventilation<br>(at baseline) | Detailed ventilation (%)      | Treatments (dose and duration)                                                                                               | Outcomes                                                                                                                                                       |
|-------------------------------------------------------------|-----------------------------------------------------|-----|----------------------------|----------|--------|-------------------------------------------------------------------------------------|--------------------------------------|--------------------------------------------|-------------------------------------------|-------------------------------|------------------------------------------------------------------------------------------------------------------------------|----------------------------------------------------------------------------------------------------------------------------------------------------------------|
| Sun, 2020 <sup>328</sup>                                    | Peer-reviewed publication                           | 66  | China                      | 49.5     | 66.7   | Cardiovascular disease (1.5%)<br>Diabetes (9.1%)<br>Hypertension (18.2%)            | Inpatient                            | Mild/Moderate (100.0%)                     | NR                                        | NR                            | standard care (150 mg three times daily)<br>diammonium glycyrrhizinate (150 mg three times daily)                            | Mortality                                                                                                                                                      |
| TOCOVID_EudraCT2020-001442-19, 2021<br>TOCOVID <sup>1</sup> | Meta-analysis<br>EudraCT2020-001442-19              | 270 | Spain                      | 53       | 63.7   | NR                                                                                  | Inpatient<br>Intensive care (100.0%) | Severe (100%)                              | NR                                        | NR                            | tocilizumab (162 mg (up to 600 mg) four doses or 400 mg (up to 600 mg) single dose based on patient weight)<br>standard care | Mortality                                                                                                                                                      |
| Taher, 2021 <sup>329</sup>                                  | Peer-reviewed publication<br>IRCT20120215009014N355 | 92  | Iran                       | 57.5     | 58.7   | Respiratory condition (15.2%)<br>Cardiovascular disease (28.3%)<br>Diabetes (23.9%) | Inpatient                            | Severe (100%)<br>Severe: Critical (100.0%) | 0                                         | Mechanical ventilation (0.0%) | N-acetylcysteine (40 mg/kg/day diluted in 5% dextrose for 3 days as a continuous intravenous infusion)<br>placebo            | Mortality<br>Mechanical ventilation<br>Adverse effects leading to discontinuation<br>Duration of hospitalization<br>ICU length of stay<br>Ventilator-free days |
| Tahmasebi, 2020 <sup>330</sup>                              | Peer-reviewed publication                           | 80  | Iran University of Medical | 54.2     | 60     | NR                                                                                  | Inpatient<br>Intensive care (50.0%)  | Mild/Moderate (50.0%)                      | NR                                        | NR                            | nanocurcumin (80 mg twice daily for 21 days)<br>placebo                                                                      | Mortality                                                                                                                                                      |

| Study                           | Publication status<br>Registration            | n   | Country              | Mean age | % Male | Comorbidities                                                                                             | Type of care | Severity              | % Mechanical ventilation (at baseline) | Detailed ventilation (%)                                                                          | Treatments (dose and duration)                                                                                                                     | Outcomes                                                                                                                                      |
|---------------------------------|-----------------------------------------------|-----|----------------------|----------|--------|-----------------------------------------------------------------------------------------------------------|--------------|-----------------------|----------------------------------------|---------------------------------------------------------------------------------------------------|----------------------------------------------------------------------------------------------------------------------------------------------------|-----------------------------------------------------------------------------------------------------------------------------------------------|
|                                 |                                               |     | Sciences is in Iran) |          |        |                                                                                                           |              |                       |                                        |                                                                                                   |                                                                                                                                                    |                                                                                                                                               |
| Talaschian, 2021 <sup>331</sup> | Pre-print<br>IRCT20081027001411N4             | 40  | Iran                 | 61.7     | 52.8   | Respiratory disorder (8.3%)<br>Cardiovascular disease (44.4%)<br>Diabetes (36.1%)<br>Hypertension (50.0%) | Inpatient    | Severe (100%)         | 8.3                                    | Nasal cannula (50.0%)<br>Simple mask (30.6%)<br>Reservoir mask (11.1%)<br>Niv (8.3%)<br>Iv (0.0%) | tocilizumab (8 mg/kg (if the patient's conditions were not stable, 2 doses by 12 hours were administrated, maximum dose: 800 mg))<br>standard care | Mortality<br>Mechanical ventilation<br>Adverse effects leading to discontinuation<br>Time to symptom/clinical improvement                     |
| Tang_1, 2020 <sup>332</sup>     | Peer-reviewed publication<br>ChiCTR2000029868 | 150 | China                | 46.1     | 55     | Cardiovascular disease (0.0%)<br>Diabetes (14.0%)<br>Hypertension (6.0%)                                  | Inpatient    | Mild/Moderate (99.0%) | NR                                     | NR                                                                                                | hydroxychloroquine (800 mg once daily for 14 to 21 days)<br>standard care                                                                          | Mortality<br>Adverse effects leading to discontinuation<br>Viral clearance<br>Time to symptom/clinical improvement<br>Time to viral clearance |

| Study                                     | Publication status<br>Registration       | n    | Country                                          | Mean age | % Male | Comorbidities                                                                                                                             | Type of care | Severity      | % Mechanical ventilation (at baseline) | Detailed ventilation (%)                                | Treatments (dose and duration)                                                                       | Outcomes                                                                                                                                                 |
|-------------------------------------------|------------------------------------------|------|--------------------------------------------------|----------|--------|-------------------------------------------------------------------------------------------------------------------------------------------|--------------|---------------|----------------------------------------|---------------------------------------------------------|------------------------------------------------------------------------------------------------------|----------------------------------------------------------------------------------------------------------------------------------------------------------|
| Tang_2, 2021 <sup>333</sup>               | Peer-reviewed publication<br>NCT04273321 | 86   | China                                            | 56       | 47.7   | Chronic obstructive pulmonary disease (3.5%)<br>Asthma (2.3%)<br>Cardiovascular disease (7.0%)<br>Diabetes (9.3%)<br>Hypertension (36.0%) | Inpatient    | Severe (100%) | NR                                     | Nasal cannula (70.9%)                                   | methyprednisolone (1 mg/kg daily for 7 days)<br>standard care                                        | Mortality<br>Mechanical ventilation<br>Viral clearance<br>Duration of hospitalization<br>Time to symptom/clinical improvement<br>Time to viral clearance |
| Tardif, 2021<br>COLCORONA <sup>334</sup>  | Peer-reviewed publication<br>NCT04322682 | 4488 | Brazil, Canada, Greece, South Africa, Spain, USA | 53.5     | 46.1   | Respiratory condition (26.5%)<br>Mi (3.0%)<br>Hf (0.9%)<br>Diabetes (19.9%)<br>Hypertension (36.3%)                                       | Outpatient   | NR            | NR                                     | NR                                                      | colchicine (0.5 mg twice per day for 3 days and then once per day for 27 days thereafter)<br>placebo | Mortality<br>Mechanical ventilation<br>Admission to hospital                                                                                             |
| Temesgen, 2021<br>LIVE-AIR <sup>335</sup> | Pre-print<br>NCT04351152                 | 520  | Brazil, United States                            | 60.5     | 64.7   | Asthma (10.6%)<br>Interstitial pulmonary fibrosis (0.8%)<br>Copd (7.3%)<br>Congestive                                                     | Inpatient    | Severe (100%) | 40.5                                   | Room air or supplemental oxygen (59.5%)<br>High-flow or | lenzilumab (600 mg, 3 doses, 8 hours apart)<br>placebo                                               | Mortality<br>Time to symptom/clinical improvement                                                                                                        |

| Study                                                                                                 | Publication status<br>Registration                              | n    | Country                                                                               | Mean age | % Male | Comorbidities                                                                                                  | Type of care                         | Severity               | % Mechanical ventilation (at baseline) | Detailed ventilation (%)                                      | Treatments (dose and duration)                                                                                            | Outcomes                                                             |
|-------------------------------------------------------------------------------------------------------|-----------------------------------------------------------------|------|---------------------------------------------------------------------------------------|----------|--------|----------------------------------------------------------------------------------------------------------------|--------------------------------------|------------------------|----------------------------------------|---------------------------------------------------------------|---------------------------------------------------------------------------------------------------------------------------|----------------------------------------------------------------------|
|                                                                                                       |                                                                 |      |                                                                                       |          |        | heart failure (11.7%)<br>Coronary artery disease (13.6%)<br>Diabetes (53.4%)                                   |                                      |                        |                                        | niv (40.5%)<br>lv (0.0%)                                      |                                                                                                                           |                                                                      |
| Thakar, 2020 <sup>336</sup>                                                                           | Peer-reviewed publication<br>CTRI/2020/04/024729                | 60   | India                                                                                 | 34.9     | 78.3   | Cardiovascular disease (0.0%)                                                                                  | Outpatient                           | Mild/Moderate (100.0%) | 0                                      | Supplemental oxygen, niv, or iv (0.0%)                        | nasal chloroquine drops (0.5 ml six doses daily for 10 days)<br>standard care                                             | Viral clearance                                                      |
| The CORIMUNO-19 Collaborative group, 2021<br>CORIMUNO-ANA-1 <sup>337</sup>                            | Peer-reviewed publication<br>NCT04341584                        | 116  | France                                                                                | 66       | 70.2   | Asthma (7.0%)<br>Chronic pulmonary disease (7.9%)<br>Chronic cardiac disease (31.6%)<br>Diabetes (29.8%)       | Inpatient                            | Severe (100%)          | 0                                      | Supplemental oxygen (100.0%)<br>High-flow or niv or iv (0.0%) | anakinra (200 mg twice daily on days 1 to 3, then 100 mg twice daily on day 4, and 100 mg once on day 5)<br>standard care | Mortality<br>Mechanical ventilation                                  |
| The REMAP-CAP, ACTIV-4a, and ATTACC Investigators, 2021<br>REMAP-CAP, ACTIV-4a, ATTACC <sup>338</sup> | Pre-print<br>NCT02735707, NCT04505774, NCT04359277, NCT04372589 | 1205 | Canada, USA, UK, Ireland, Netherlands, Saudi Arabia, Australia, Nepal, Brazil, Mexico | 60.9     | 70     | Asthma, chronic obstructive pulmonary disease, bronchiectasis, interstitial lung disease, primary lung cancer, | Inpatient<br>Intensive care (100.0%) | Severe (100%)          | 98.6                                   | High flow nasal oxygen (33.1%)<br>Niv (38.0%)<br>lv (27.6%)   | therapeutic heparin (according to local protocol for up to 14 days or recovery)<br>standard care                          | Mortality<br>Venous thromboembolism<br>Clinically important bleeding |

| Study | Publication<br>status<br>Registration | n | Country | Mean<br>age | % Male | Comorbidities                                                                                                                                                                                                                                                                                                                                                                                                                                         | Type of care | Severity | % Mechanical<br>ventilation<br>(at baseline) | Detailed<br>ventilation (%) | Treatments (dose and<br>duration) | Outcomes |
|-------|---------------------------------------|---|---------|-------------|--------|-------------------------------------------------------------------------------------------------------------------------------------------------------------------------------------------------------------------------------------------------------------------------------------------------------------------------------------------------------------------------------------------------------------------------------------------------------|--------------|----------|----------------------------------------------|-----------------------------|-----------------------------------|----------|
|       |                                       |   |         |             |        | pulmonary<br>hypertension,<br>active<br>tuberculosis,<br>or through the<br>receipt of<br>home oxygen<br>therapy<br>(24.1%)<br>New york<br>heart<br>association<br>class iv<br>symptoms;<br>defined in<br>activ-4a and<br>attacc as a<br>baseline<br>history of<br>heart failure,<br>myocardial<br>infarction,<br>coronary<br>artery disease,<br>peripheral<br>arterial<br>disease, or<br>cerebrovascul<br>ar disease<br>(6.9%)<br>Diabetes<br>(32.7%) |              |          |                                              |                             |                                   |          |

| Study                                       | Publication status<br>Registration       | n   | Country       | Mean age | % Male | Comorbidities                                                                                                                                | Type of care                         | Severity                 | % Mechanical ventilation (at baseline) | Detailed ventilation (%)             | Treatments (dose and duration)                                                                                                                                                                                                          | Outcomes                                                                                                                                            |
|---------------------------------------------|------------------------------------------|-----|---------------|----------|--------|----------------------------------------------------------------------------------------------------------------------------------------------|--------------------------------------|--------------------------|----------------------------------------|--------------------------------------|-----------------------------------------------------------------------------------------------------------------------------------------------------------------------------------------------------------------------------------------|-----------------------------------------------------------------------------------------------------------------------------------------------------|
| Thomas, 2021<br>COVID A to Z <sup>339</sup> | Peer-reviewed publication<br>NCT04342728 | 214 | United States | 45.2     | 38.3   | Asthma (15.4%)<br>Diabetes (13.6%)<br>Hypertension (32.7%)                                                                                   | Outpatient                           | NR                       | NR                                     | NR                                   | ascorbic acid (8000 mg divided in 2 or 3 doses/day for 10 days)<br>zinc gluconate (50 mg/day for 10 days)<br>ascorbic acid (8000 mg divided in 2 or 3 doses/day for 10 days)<br>zinc gluconate (50 mg/day for 10 days)<br>standard care | Mortality<br>Admission to hospital<br>Adverse effects leading to discontinuation<br>Time to symptom/clinical improvement                            |
| Tolouian, 2021 <sup>340</sup>               | Peer-reviewed publication                | 111 | Iran          | 52       | 46     | Asthma (6.0%)<br>Copd (7.0%)<br>Cerebrovascular accident (2.0%)<br>Coronary heart disease (9.0%)<br>Diabetes (33.0%)<br>Hypertension (39.0%) | Inpatient                            | NR                       | NR                                     | NR                                   | bromhexine hydrochloride (8 mg four times a day for 14 days)<br>standard care                                                                                                                                                           | Mortality<br>Mechanical ventilation<br>Viral clearance<br>Duration of hospitalization<br>ICU length of stay<br>Time to symptom/clinical improvement |
| Tomazini, 2020<br>CoDEX <sup>341</sup>      | Peer-reviewed publication<br>NCT04327401 | 299 | Brazil        | 61.4     | 62.5   | Heart failure (7.7%)<br>Diabetes (42.1%)                                                                                                     | Inpatient<br>Intensive care (100.0%) | Severe (100%)<br>Severe: | 91                                     | Pressure control ventilation (44.5%) | dexamethasone (20 mg once daily for 5 days, then 10 mg once                                                                                                                                                                             | Mortality<br>Mechanical ventilation<br>Ventilator-                                                                                                  |

| Study                                    | Publication status<br>Registration | n   | Country | Mean age | % Male | Comorbidities                                                                                                                                                                     | Type of care      | Severity               | % Mechanical ventilation<br>(at baseline) | Detailed ventilation (%)                                     | Treatments (dose and duration)                                                     | Outcomes                                                                                    |
|------------------------------------------|------------------------------------|-----|---------|----------|--------|-----------------------------------------------------------------------------------------------------------------------------------------------------------------------------------|-------------------|------------------------|-------------------------------------------|--------------------------------------------------------------|------------------------------------------------------------------------------------|---------------------------------------------------------------------------------------------|
|                                          |                                    |     |         |          |        | Hypertension (66.2%)                                                                                                                                                              |                   | Critical (100.0%)      |                                           | Volume control ventilation (46.5%)<br>Other (9.0%)           | daily for 5 days)<br>standard care                                                 | free days<br>Duration of ventilation                                                        |
| Tornling, 2021<br>ATTRACT <sup>342</sup> | Pre-print<br>NCT04452435           | 106 | India   | 52.6     | 75.5   | Copd, idiopathic pulmonary disease (0.0%)<br>Concurrent serious medical condition with special attention to cardiac conditions (0.0%)<br>Diabetes (34.0%)<br>Hypertension (30.2%) | Inpatient         | Severe (100%)          | 0                                         | Supplemental oxygen (57.5%)<br>Mechanical ventilation (0.0%) | angiotensin type 2 receptor agonist C21 (100 mg twice daily for 7 days)<br>placebo | Mortality<br>Mechanical ventilation                                                         |
| Trieu, 2021<br>ARTI-19 <sup>343</sup>    | Pre-print<br>CTRI/2020/09/028044   | 60  | India   | 43.3     | 63.3   | Diabetes (0.0%)<br>Hypertension (0.0%)                                                                                                                                            | Inpatient (46.7%) | Mild/Moderate (100.0%) | 0                                         | Supplemental oxygen, niv, or iv (0.0%)                       | ARTIVeda (500 mg/day for 5 days)<br>standard care                                  | Mortality<br>Admission to hospital<br>Adverse effects leading to discontinuation<br>Time to |

| Study                                | Publication status<br>Registration               | n   | Country       | Mean age | % Male | Comorbidities                                                                                                                                                                                                                 | Type of care | Severity               | % Mechanical ventilation (at baseline) | Detailed ventilation (%)                                        | Treatments (dose and duration)                                  | Outcomes                                                                                                                                                                                                  |
|--------------------------------------|--------------------------------------------------|-----|---------------|----------|--------|-------------------------------------------------------------------------------------------------------------------------------------------------------------------------------------------------------------------------------|--------------|------------------------|----------------------------------------|-----------------------------------------------------------------|-----------------------------------------------------------------|-----------------------------------------------------------------------------------------------------------------------------------------------------------------------------------------------------------|
|                                      |                                                  |     |               |          |        |                                                                                                                                                                                                                               |              |                        |                                        |                                                                 |                                                                 | symptom/clinical improvement                                                                                                                                                                              |
| Udwadia, 2020 <sup>344</sup>         | Peer-reviewed publication<br>CTRI/2020/05/025114 | 150 | India         | 43.3     | 73.5   | Asthma (0.0%)<br>Chronic obstructive lung disease (0.0%)<br>Prolonged qt defined as qtcf ≥450 msec for men and as qtcf ≥470 msec for women (0.0%)<br>Severely reduced left ventricular function,ejection fraction <30% (0.0%) | Inpatient    | Mild/Moderate (100.0%) | 0                                      | Niv (0.0%)<br>Iv (0.0%)<br>Ecmo (0.0%)                          | favipiravir (800 mg twice daily up to 14 days)<br>standard care | Mortality<br>Mechanical ventilation<br>Adverse effects leading to discontinuation<br>Viral clearance<br>Duration of hospitalization<br>Time to symptom/clinical improvement<br>Time to to viral clearance |
| Ulrich, 2020<br>TEACH <sup>345</sup> | Peer-reviewed publication<br>NCT04369742         | 128 | United states | 66.2     | 59.4   | Asthma (15.6%)<br>Copd (7.0%)<br>Non-hypertensive cardiovascular                                                                                                                                                              | Inpatient    | Severe (100%)          | 1.6                                    | Nasal cannula (48.4%)<br>High-flow (0.8%)<br>Niv (0.8%)<br>Non- | hydroxychloroquine (200 mg twice daily for 5 days)<br>placebo   | Mortality<br>Mechanical ventilation<br>Viral clearance<br>Duration of                                                                                                                                     |

| Study                                         | Publication status<br>Registration       | n   | Country   | Mean age | % Male | Comorbidities                                                                                                                                            | Type of care | Severity                                   | % Mechanical ventilation<br>(at baseline) | Detailed ventilation (%)       | Treatments (dose and duration)                                                   | Outcomes                                                                                                   |
|-----------------------------------------------|------------------------------------------|-----|-----------|----------|--------|----------------------------------------------------------------------------------------------------------------------------------------------------------|--------------|--------------------------------------------|-------------------------------------------|--------------------------------|----------------------------------------------------------------------------------|------------------------------------------------------------------------------------------------------------|
|                                               |                                          |     |           |          |        | disease (25.6%)<br>Diabetes (32.0%)<br>Hypertension (57.8%)                                                                                              |              |                                            |                                           | rebreather (14.1%)             |                                                                                  | hospitalization                                                                                            |
| Vaira, 2020 <sup>346</sup>                    | Peer-reviewed publication                | 18  | Italy     | 42.1     | 38.9   | NR                                                                                                                                                       | Outpatient   | NR                                         | NR                                        | NR                             | corticosteroids (1 mg/kg/day with tapering of dose for 15 days)<br>standard care | NR                                                                                                         |
| Valizadeh, 2020 <sup>347</sup>                | Peer-reviewed publication                | 40  | Iran      | 52.4     | 77.5   | Cardiovascular disease (12.5%)<br>Diabetes (7.5%)<br>Hypertension (5.0%)                                                                                 | Inpatient    | Severe (100%)<br>Severe: Critical (100.0%) | NR                                        | NR                             | nanocurcumin (160 mg/day for 14 days)<br>placebo                                 | Mortality                                                                                                  |
| Vallejos, 2021 IVERCOR-COVID19 <sup>348</sup> | Peer-reviewed publication<br>NCT04529525 | 501 | Argentina | 42.5     | 52.7   | Asthma (7.2%)<br>Copd (2.8%)<br>Previous myocardial infarction (1.8%)<br>Previous coronary angioplasty (0.8%)<br>Previous stroke (1.0%)<br>Heart failure | Outpatient   | NR                                         | 0                                         | Unspecified ventilation (0.0%) | ivermectin (12 mg daily for 2 days (>48 and <80 kg))<br>placebo                  | Mortality<br>Mechanical ventilation<br>Admission to hospital<br>Adverse effects leading to discontinuation |

| Study                                  | Publication status<br>Registration       | n   | Country     | Mean age | % Male | Comorbidities                                                                                                                    | Type of care                        | Severity      | % Mechanical ventilation<br>(at baseline) | Detailed ventilation (%)                                              | Treatments (dose and duration)                                                    | Outcomes                                                                      |
|----------------------------------------|------------------------------------------|-----|-------------|----------|--------|----------------------------------------------------------------------------------------------------------------------------------|-------------------------------------|---------------|-------------------------------------------|-----------------------------------------------------------------------|-----------------------------------------------------------------------------------|-------------------------------------------------------------------------------|
|                                        |                                          |     |             |          |        | (0.8%)<br>Diabetes<br>(9.6%)<br>Hypertension<br>(23.8%)                                                                          |                                     |               |                                           |                                                                       |                                                                                   |                                                                               |
| Veiga, 2021<br>TOCIBRAS <sup>349</sup> | Published<br>NCT04403685                 | 129 | Brazil      | 57.5     | 68.2   | Asthma (3.9%)<br>Copd (3.1%)<br>Heart failure (5.4%)<br>Myocardial infarction (5.4%)<br>Diabetes (32.6%)<br>Hypertension (49.6%) | Inpatient                           | Severe (100%) | 48.1                                      | Supplemental oxygen (51.9%)<br>High-flow or niv (31.8%)<br>Iv (16.3%) | tocilizumab (8 mg/kg, for a maximum of 800 mg, in 24 hours)<br>standard care      | Mechanical ventilation<br>Duration of hospitalization<br>Ventilator-free days |
| Vlaar, 2020<br>PANAMO <sup>350</sup>   | Peer-reviewed publication<br>NCT04333420 | 30  | Netherlands | 60.5     | 73.3   | Copd (0.0%)<br>Severe congestive heart failure<br>nyha-class iii or iv (0.0%)<br>Diabetes (26.7%)<br>Hypertension (30.0%)        | Inpatient<br>Intensive care (60.0%) | Severe (100%) | 60                                        | Iv (60.0%)<br>Supplemental oxygen (26.7%)<br>Nasal cannula (13.3%)    | vilobelimab (800 mg once daily for up to 7 times within 22 days)<br>standard care | Mortality<br>Adverse effects leading to discontinuation                       |

| Study                          | Publication status<br>Registration       | n    | Country  | Mean age | % Male | Comorbidities                                                             | Type of care | Severity               | % Mechanical ventilation (at baseline) | Detailed ventilation (%)                                                     | Treatments (dose and duration)                                  | Outcomes                                                                                                                                                              |
|--------------------------------|------------------------------------------|------|----------|----------|--------|---------------------------------------------------------------------------|--------------|------------------------|----------------------------------------|------------------------------------------------------------------------------|-----------------------------------------------------------------|-----------------------------------------------------------------------------------------------------------------------------------------------------------------------|
| Vyas, 2021 <sup>351</sup>      | Data from authors<br>CTRI/2021/08/035424 | 1220 | India    | 36.5     | 61.6   | Diabetes mellitus (0.3%)<br>T2DM (0.2%)<br>Hypertension (1.1%)            | Outpatient   | Mild/Moderate (100.0%) | NR                                     | NR                                                                           | molnupiravir (800 mg twice a day for 5 days)<br>standard care   | Mortality<br>Mechanical ventilation<br>Admission to hospital<br>Adverse effects leading to discontinuation<br>Viral clearance<br>Time to symptom/clinical improvement |
| Wanaratna, 2021 <sup>352</sup> | Pre-print                                | 63   | Thailand | 39.4     | 40.4   | NR                                                                        | Inpatient    | Mild/Moderate (100.0%) | NR                                     | NR                                                                           | andrographolide (60 mg three times daily for 5 days)<br>placebo | Adverse effects leading to discontinuation<br>Viral clearance                                                                                                         |
| Wang_1, 2020 <sup>353</sup>    | Peer-reviewed publication<br>NCT04257656 | 237  | China    | 65       | 59.3   | Cardiovascular disease (7.2%)<br>Diabetes (23.7%)<br>Hypertension (43.2%) | Inpatient    | Severe (100%)          | 16.1                                   | Supplemental oxygen (82.2%)<br>High-flow or niv (15.7%)<br>lv or ecmo (0.4%) | remdesivir (100 mg once daily for 10 days)<br>placebo           | Mortality<br>Mechanical ventilation<br>Adverse effects leading to discontinuation                                                                                     |

| Study                       | Publication status<br>Registration            | n  | Country | Mean age | % Male | Comorbidities                              | Type of care | Severity               | % Mechanical ventilation (at baseline) | Detailed ventilation (%)                              | Treatments (dose and duration)                                        | Outcomes                                                                                                          |
|-----------------------------|-----------------------------------------------|----|---------|----------|--------|--------------------------------------------|--------------|------------------------|----------------------------------------|-------------------------------------------------------|-----------------------------------------------------------------------|-------------------------------------------------------------------------------------------------------------------|
|                             |                                               |    |         |          |        |                                            |              |                        |                                        |                                                       |                                                                       | Viral clearance<br>Duration of hospitalization<br>Duration of ventilation<br>Time to symptom/clinical improvement |
| Wang_2, 2020 <sup>354</sup> | Peer-reviewed publication                     | 20 | China   | 47       | 45     | Acute respiratory distress syndrome (0.0%) | Inpatient    | NR                     | NR                                     | NR                                                    | vitamin C (10 g/60 kg twice daily)<br>standard care                   | NR                                                                                                                |
| Wang_3, 2020 <sup>355</sup> | Peer-reviewed publication                     | 60 | China   | NR       | 38.3   | NR                                         | Inpatient    | Mild/Moderate (100.0%) | NR                                     | NR                                                    | lopinavir-ritonavir (2 tablets twice daily)<br>standard care          | NR                                                                                                                |
| Wang_4, 2020 <sup>356</sup> | Peer-reviewed publication<br>ChiCTR2000029765 | 65 | China   | 63       | 50.8   | Diabetes (15.4%)<br>Hypertension (30.8%)   | Inpatient    | Mild/Moderate (56.9%)  | 9.2                                    | Nasal duct (58.5%)<br>Mask (6.2%)<br>High-flow (9.2%) | tocilizumab (400 mg for up to two times in 24 hours)<br>standard care | Duration of hospitalization<br>Time to symptom/clinical improvement<br>Time to to                                 |

| Study                                               | Publication status<br>Registration                       | n   | Country                             | Mean age | % Male | Comorbidities                                                                            | Type of care | Severity                                                           | % Mechanical ventilation<br>(at baseline) | Detailed ventilation (%)                   | Treatments (dose and duration)                                                           | Outcomes                                                                                                                                |
|-----------------------------------------------------|----------------------------------------------------------|-----|-------------------------------------|----------|--------|------------------------------------------------------------------------------------------|--------------|--------------------------------------------------------------------|-------------------------------------------|--------------------------------------------|------------------------------------------------------------------------------------------|-----------------------------------------------------------------------------------------------------------------------------------------|
|                                                     |                                                          |     |                                     |          |        |                                                                                          |              |                                                                    |                                           |                                            |                                                                                          | viral clearance                                                                                                                         |
| Wang_5, 2020 <sup>357</sup>                         | Peer-reviewed publication<br>ChiCTR 2000030058           | 50  | China                               | 55.8     | 45.8   | Copd (4.2%)<br>Coronary artery disease (2.1%)<br>Diabetes (4.2%)<br>Hypertension (25.0%) | Inpatient    | Mild/Moderate (81.3%)<br>Severe (18.8%)<br>Severe: Critical (4.2%) | NR                                        | NR                                         | leflunomide (50 mg twice daily for 1.5 days, then 20 mg/day for 8 days)<br>standard care | Mortality<br>Adverse effects leading to discontinuation<br>Viral clearance<br>Duration of hospitalization<br>Time to to viral clearance |
| Wilkinson, 2021<br>BGBC020, ACCORD-2 <sup>358</sup> | Data from authors<br>CTRI/2020/10/028602, ISRCTN57085639 | 177 | United Kingdom, South Africa, India | NR       | NR     | NR                                                                                       | Inpatient    | NR                                                                 | 13.6                                      | Supplemental oxygen (78.5%)<br>Niv (13.6%) | bemcentinib (200 mg once daily for 15 days)<br>standard care                             | Mortality<br>Time to symptom/clinical improvement                                                                                       |
| Winchester, 2021 <sup>359</sup>                     | Peer-reviewed publication                                | 80  | England                             | 44       | 36.7   | Respiratory condition (1.3%)<br>Cardiovascular disease (0.0%)<br>Diabetes (6.3%)         | NR           | Mild/Moderate (100.0%)                                             | NR                                        | NR                                         | nitric oxide nasal spray (5 to 6 times daily at 4 sprays per dose for 9 days)<br>placebo | NR                                                                                                                                      |

| Study                         | Publication status<br>Registration             | n  | Country       | Mean age | % Male | Comorbidities                                                                                                                | Type of care | Severity      | % Mechanical ventilation<br>(at baseline) | Detailed ventilation (%)                                      | Treatments (dose and duration)                                                      | Outcomes                                                                                                                                                     |
|-------------------------------|------------------------------------------------|----|---------------|----------|--------|------------------------------------------------------------------------------------------------------------------------------|--------------|---------------|-------------------------------------------|---------------------------------------------------------------|-------------------------------------------------------------------------------------|--------------------------------------------------------------------------------------------------------------------------------------------------------------|
|                               |                                                |    |               |          |        | Hypertension (6.3%)                                                                                                          |              |               |                                           |                                                               |                                                                                     |                                                                                                                                                              |
| Winthrop, 2021 <sup>360</sup> | Pre-print<br>NCT04414618                       | 42 | United States | 56.1     | 64.3   | Any respiratory condition requirin intermittent or continuous ambulatory oxygen prior to hospitalization (0.0%)              | Inpatient    | Severe (100%) | 0                                         | Supplemental oxygen (100.0%)<br>Mechanical ventilation (0.0%) | opaganib (250 mg twice daily for 14 days)<br>placebo                                | Mortality<br>Mechanical ventilation<br>Adverse effects leading to discontinuati on<br>Duration of hospitalizati on<br>Time to symptom/cli nical improvemen t |
| Wu, 2020 <sup>361</sup>       | Peer-reviewed publication<br>ChiCTR20000300001 | 52 | China         | 58       | 50     | Copd (5.8%)<br>Cardiovascular disease (15.4%)<br>Cerebrovascul ar disease (7.7%)<br>Diabetes (15.4%)<br>Hypertension (28.8%) | Inpatient    | NR            | NR                                        | NR                                                            | triazavirin (250 mg three times daily for 7 days in mildly ill patients)<br>placebo | Mortality<br>Adverse effects leading to discontinuati on<br>Viral clearance<br>Time to symptom/cli nical improvemen                                          |

| Study                               | Publication status<br>Registration | n   | Country | Mean age | % Male | Comorbidities                                                                                             | Type of care | Severity                                | % Mechanical ventilation<br>(at baseline) | Detailed ventilation (%)      | Treatments (dose and duration)                                                                                         | Outcomes                                                                                     |
|-------------------------------------|------------------------------------|-----|---------|----------|--------|-----------------------------------------------------------------------------------------------------------|--------------|-----------------------------------------|-------------------------------------------|-------------------------------|------------------------------------------------------------------------------------------------------------------------|----------------------------------------------------------------------------------------------|
|                                     |                                    |     |         |          |        |                                                                                                           |              |                                         |                                           |                               |                                                                                                                        | t<br>Time to to viral clearance                                                              |
| Yadegarinia, 2020 <sup>362</sup>    | Peer-reviewed publication          | 34  | Iran    | 64.1     | 76.5   | Diabetes (47.1%)<br>Hypertension (38.2%)                                                                  | Inpatient    | Severe (100%)                           | NR                                        | NR                            | umifenovir<br>standard care                                                                                            | Mortality<br>Duration of hospitalization                                                     |
| Yadollahzadeh , 2021 <sup>363</sup> | Pre-print<br>IRCT20200328046885N1  | 112 | Iran    | 57.6     | 44.6   | Chronic lung disease (3.6%)<br>Cardiovascular disease (15.2%)<br>Diabetes (21.4%)<br>Hypertension (25.0%) | Inpatient    | NR                                      | 0                                         | Mechanical ventilation (0.0%) | sofosbuvir-daclatasvir (400 mg and 60 mg once a day)<br>lopinavir-ritonavir (400 mg and 100 mg twice daily for 7 days) | Mortality<br>Duration of hospitalization                                                     |
| Yaghoubian, 2021 <sup>364</sup>     | Peer-reviewed publication          | 0   | Iran    | 52.1     | 69.7   | NR                                                                                                        | NR           | NR                                      | NR                                        | NR                            | L-cysteine (90 mg/kg three times a day for two weeks)<br>placebo                                                       | NR                                                                                           |
| Yakoot, 2020 <sup>365</sup>         | Pre-print<br>DRKS00022203          | 89  | Egypt   | 49       | 42.7   | Asthma (1.1%)<br>Heart disease (9.0%)<br>Diabetes (19.1%)<br>Hypertension (25.8%)                         | Inpatient    | Mild/Moderate (82.0%)<br>Severe (18.0%) | 0                                         | Iv (0.0%)                     | sofosbuvir-daclatasvir (400 mg/60 mg for 10 days)<br>standard care                                                     | Mortality<br>Mechanical ventilation<br>Adverse effects leading to discontinuation<br>Time to |

| Study                          | Publication status<br>Registration               | n   | Country       | Mean age | % Male | Comorbidities                                                                            | Type of care                         | Severity                  | % Mechanical ventilation (at baseline) | Detailed ventilation (%) | Treatments (dose and duration)                                                                                                                                                                                        | Outcomes                                          |
|--------------------------------|--------------------------------------------------|-----|---------------|----------|--------|------------------------------------------------------------------------------------------|--------------------------------------|---------------------------|----------------------------------------|--------------------------|-----------------------------------------------------------------------------------------------------------------------------------------------------------------------------------------------------------------------|---------------------------------------------------|
|                                |                                                  |     |               |          |        |                                                                                          |                                      |                           |                                        |                          |                                                                                                                                                                                                                       | symptom/clinical improvement                      |
| Yethindra, 2020 <sup>366</sup> | Peer-reviewed publication                        | 30  | Kyrgyzstan    | 36.5     | 60     | Cardiovascular disease (0.0%)                                                            | Inpatient                            | NR                        | NR                                     | NR                       | umifenovir (200 mg three times daily for 1 to 5 days) standard care                                                                                                                                                   | Mortality<br>Time to symptom/clinical improvement |
| Yildiz, 2021 <sup>367</sup>    | Peer-reviewed publication                        | 150 | Turkey        | 38.3     | 56     | Asthma/copd (6.0%)<br>Cardiac disease (12.7%)<br>Diabetes (7.3%)<br>Hypertension (12.0%) | Inpatient                            | NR                        | NR                                     | NR                       | saline irrigation (10 cc per nose twice daily for one month)<br>triamcinolone acetonide (2 puffs per nose twice daily for one month)<br>saline irrigation (10 cc per nose twice daily for one month)<br>standard care | Time to symptom/clinical improvement              |
| Yogesh, 2021 <sup>368</sup>    | Peer-reviewed publication<br>CTRI/2020/09/027938 | 100 | India         | 41.2     | 52     | NR                                                                                       | Inpatient                            | NR                        | NR                                     | NR                       | curcumin (Administered as proprietary Curmune tablets daily for 10 day) vitamin C ( ) zinc ( ) standard care                                                                                                          | Mortality                                         |
| Youssef, 2021 <sup>369</sup>   | Pre-print<br>NCT04311697                         | 203 | United States | 61       | 69     | NR                                                                                       | Inpatient<br>Intensive care (100.0%) | Severe: Critical (100.0%) | 99.5                                   | High-flow (64.8%)        | aviptadil (Three twelve-hour infusions over three days of doses of 50, 100, and                                                                                                                                       | Mortality                                         |

| Study                                | Publication status<br>Registration                | n    | Country        | Mean age | % Male | Comorbidities                                                                                                                                         | Type of care | Severity               | % Mechanical ventilation<br>(at baseline) | Detailed ventilation (%)  | Treatments (dose and duration)                                                     | Outcomes                                                                                                     |
|--------------------------------------|---------------------------------------------------|------|----------------|----------|--------|-------------------------------------------------------------------------------------------------------------------------------------------------------|--------------|------------------------|-------------------------------------------|---------------------------|------------------------------------------------------------------------------------|--------------------------------------------------------------------------------------------------------------|
|                                      |                                                   |      |                |          |        |                                                                                                                                                       |              |                        |                                           | Niv (16.3%)<br>lv (18.4%) | 150 pmol/kg/hr)<br>placebo                                                         |                                                                                                              |
| Yu, 2021<br>PRINCIPLE <sup>370</sup> | Peer-reviewed publication<br>ISRCTN86534580       | 2975 | United Kingdom | 62.8     | 46.2   | Asthma, copd or lung disease (18.3%)<br>Angina, heart attack, heart failure, af, valve problems (15.4%)<br>Diabetes (20.5%)<br>Medication hbp (43.9%) | Outpatient   | NR                     | NR                                        | NR                        | inhaled budesonide (inhalation of 800 µg twice daily for 14 days)<br>standard care | Mechanical ventilation<br>Time to symptom/clinical improvement                                               |
| Yuan, 2020 <sup>371</sup>            | Pre-print<br>ChiCTR2000029431                     | 21   | China          | 61       | 42.9   | NR                                                                                                                                                    | Inpatient    | Mild/Moderate (100.0%) | NR                                        | NR                        | 99mTc-methylene diphosphonate (5 ml once daily for 7 days)<br>standard care        | NR                                                                                                           |
| Zarehoseinzad , 2021 <sup>372</sup>  | Peer-reviewed publication<br>IRCT20200505047318N1 | 80   | Iran           | 71.5     | 100    | Chronic obstructive pulmonary disease (12.5%)<br>Cardiac disease (38.8%)<br>Diabetes (25.0%)                                                          | Inpatient    | Severe (100%)          | NR                                        | NR                        | finasteride (5 mg once daily for 7 days)<br>standard care                          | Mortality<br>Adverse effects leading to discontinuation<br>Duration of hospitalization<br>ICU length of stay |

| Study                        | Publication status<br>Registration       | n  | Country | Mean age | % Male | Comorbidities                                                                                                                                   | Type of care                         | Severity      | % Mechanical ventilation<br>(at baseline) | Detailed ventilation (%)                       | Treatments (dose and duration)                                               | Outcomes                                                                                                                                                                                  |
|------------------------------|------------------------------------------|----|---------|----------|--------|-------------------------------------------------------------------------------------------------------------------------------------------------|--------------------------------------|---------------|-------------------------------------------|------------------------------------------------|------------------------------------------------------------------------------|-------------------------------------------------------------------------------------------------------------------------------------------------------------------------------------------|
|                              |                                          |    |         |          |        | Hypertension (66.2%)                                                                                                                            |                                      |               |                                           |                                                |                                                                              | Duration of ventilation                                                                                                                                                                   |
| Zhang_1, 2021 <sup>373</sup> | Peer-reviewed publication<br>NCT04264533 | 56 | China   | 66.1     | 64.3   | Chronic lung disease (5.4%)<br>End-stage pulmonary disease (0.0%)<br>Coronary heart disease (21.4%)<br>Diabetes (30.4%)<br>Hypertension (44.6%) | Inpatient<br>Intensive care (100.0%) | Severe (100%) | 98.2                                      | High-flow (32.1%)<br>Niv (25.0%)<br>lv (41.1%) | vitamin C (12 g/50 ml given at 12 ml/hour twice daily for 7 days)<br>placebo | Mortality<br>Mechanical ventilation<br>Adverse effects leading to discontinuation<br>Duration of hospitalization<br>ICU length of stay<br>Ventilator-free days<br>Duration of ventilation |
| Zhang_2, 2020 <sup>374</sup> | Peer-reviewed publication                | 35 | China   | NR       | NR     | NR                                                                                                                                              | Inpatient                            | Severe (100%) | NR                                        | NR                                             | berberine (900 mg/day for 14 days)<br>standard care                          | Adverse effects leading to discontinuation                                                                                                                                                |

| Study                       | Publication status<br>Registration                            | n   | Country | Mean age | % Male | Comorbidities                                                                                                                                                                                            | Type of care | Severity                                                           | % Mechanical ventilation (at baseline) | Detailed ventilation (%)            | Treatments (dose and duration)                                                                                                                                                         | Outcomes                                                                                                                   |
|-----------------------------|---------------------------------------------------------------|-----|---------|----------|--------|----------------------------------------------------------------------------------------------------------------------------------------------------------------------------------------------------------|--------------|--------------------------------------------------------------------|----------------------------------------|-------------------------------------|----------------------------------------------------------------------------------------------------------------------------------------------------------------------------------------|----------------------------------------------------------------------------------------------------------------------------|
| Zhang_3, 202 <sup>375</sup> | Peer-reviewed publication<br>NCT04295551                      | 130 | China   | 46.3     | 46.2   | Obstructive pneumonia (0.0%)<br>Pulmonary interstitial fibrosis (0.0%)<br>Alveolar proteinosis (0.0%)<br>All allergic alveolitis caused by lung tumors (0.0%)<br>Diabetes (7.7%)<br>Hypertension (16.2%) | Inpatient    | NR                                                                 | NR                                     | NR                                  | xiyanping (10 mg/kg once a day up to 500 mg for 7 to 14 days)<br>standard care                                                                                                         | Mortality<br>Adverse effects leading to discontinuation<br>Time to symptom/clinical improvement<br>Time to viral clearance |
| Zhao_1, 2020 <sup>376</sup> | Peer-reviewed publication<br>ChiCTR2000030894,<br>NCT04310228 | 26  | China   | 73.5     | 53.9   | Tuberculosis (0.0%)<br>Coronary artery disease (23.1%)<br>Diabetes (11.5%)<br>Hypertension (42.3%)                                                                                                       | Inpatient    | Mild/Moderate (46.1%)<br>Severe (53.9%)<br>Severe: Critical (3.9%) | 3.9                                    | Nasal cannula (65.4%)<br>Niv (3.9%) | favipiravir (600 mg twice daily for 7 days)<br>tocilizumab (4-8 mg/kg in 100 ml for 1 hr)<br>favipiravir (600 mg twice daily for 7 days)<br>tocilizumab (4-8 mg/kg in 100 ml for 1 hr) | Mortality<br>Mechanical ventilation                                                                                        |
| Zhao_2, 2021 <sup>377</sup> | Peer-reviewed publication<br>NCT04333589                      | 55  | China   | 55.7     | 45.5   | Coronary heart disease (7.3%)<br>Diabetes (14.6%)                                                                                                                                                        | Outpatient   | Mild/Moderate (98.2%)                                              | NR                                     | NR                                  | favipiravir (600 mg twice daily for 7 days up to 14 days)<br>standard care                                                                                                             | Mortality<br>Viral clearance<br>Time to to                                                                                 |

| Study                      | Publication status<br>Registration            | n  | Country | Mean age | % Male | Comorbidities                                                                                                                                                     | Type of care | Severity                 | % Mechanical ventilation (at baseline) | Detailed ventilation (%)                   | Treatments (dose and duration)                                                                                                                                                                           | Outcomes                                                                                    |
|----------------------------|-----------------------------------------------|----|---------|----------|--------|-------------------------------------------------------------------------------------------------------------------------------------------------------------------|--------------|--------------------------|----------------------------------------|--------------------------------------------|----------------------------------------------------------------------------------------------------------------------------------------------------------------------------------------------------------|---------------------------------------------------------------------------------------------|
|                            |                                               |    |         |          |        | Hypertension (30.9%)                                                                                                                                              |              |                          |                                        |                                            |                                                                                                                                                                                                          | viral clearance                                                                             |
| Zheng, 2020 <sup>378</sup> | Peer-reviewed publication                     | 80 | China   | 50.3     | 61.2   | Cardiovascular disease (0.0%)                                                                                                                                     | Inpatient    | NR                       | NR                                     | NR                                         | sodium tanshinone IIA sulfonate (60 mg once daily for 10 days) standard care                                                                                                                             | Adverse effects leading to discontinuation<br>Viral clearance<br>Time to to viral clearance |
| Zheng, 2020 <sup>379</sup> | Peer-reviewed publication<br>ChiCTR2000029496 | 89 | China   | 46.7     | 47.2   | Severe lung disease (0.0%)<br>Chronic bronchitis (2.0%)<br>Severe heart disease (0.0%)<br>Coronary heart disease (3.0%)<br>Diabetes (8.1%)<br>Hypertension (6.1%) | Inpatient    | Mild/Moderate (94.4%)    | NR                                     | NR                                         | novaferon (20 µg twice daily for 7 to 10 days)<br>lopinavir-ritonavir (50 mg and 200 mg twice daily for 7 to 10 days)<br>novaferon ()<br>lopinavir-ritonavir (200 mg/50 mg twice daily for 7 to 10 days) | Adverse effects leading to discontinuation<br>Viral clearance<br>Time to to viral clearance |
| Zhong, 2020 <sup>380</sup> | Pre-print<br>ChiCTR2000029851                 | 17 | China   | 63       | 76.5   | Cardiovascular disease (5.9%)<br>Diabetes (23.5%)                                                                                                                 | Inpatient    | Severe (100%)<br>Severe: | 94.1                                   | Supplemental oxygen (5.9%)<br>High-flow or | alpha lipoic acid (1200 mg once daily for 7                                                                                                                                                              | Mortality<br>Adverse effects leading to                                                     |

| Study                         | Publication status<br>Registration       | n   | Country | Mean age | % Male | Comorbidities                                                                       | Type of care | Severity               | % Mechanical ventilation (at baseline) | Detailed ventilation (%)                                                       | Treatments (dose and duration)                                                                                       | Outcomes                                                                                                                                                                                               |
|-------------------------------|------------------------------------------|-----|---------|----------|--------|-------------------------------------------------------------------------------------|--------------|------------------------|----------------------------------------|--------------------------------------------------------------------------------|----------------------------------------------------------------------------------------------------------------------|--------------------------------------------------------------------------------------------------------------------------------------------------------------------------------------------------------|
|                               |                                          |     |         |          |        | Hypertension (47.1%)                                                                |              | Critical (100.0%)      |                                        | niv (41.2%)<br>lv (52.9%)                                                      | days)<br>placebo                                                                                                     | discontinuati<br>on                                                                                                                                                                                    |
| Zhou, 2020 <sup>381</sup>     | Peer-reviewed publication                | 104 | China   | 52.1     | 57.7   | Interstitial pneumonia (0.0%)<br>Severe heart disease (0.0%)<br>Hypertension (0.0%) | Inpatient    | Mild/Moderate (100.0%) | NR                                     | NR                                                                             | diammonium glycyrrhizinate (150 mg three times daily for 14 days)<br>standard care                                   | Adverse effects leading to discontinuation                                                                                                                                                             |
| Zhuravel, 2021 <sup>382</sup> | Peer-reviewed publication<br>NCT04623021 | 104 | Russia  | 58.6     | 49.5   | T2DM (10.7%)<br>Hypertension (62.1%)                                                | Inpatient    | Severe (100%)          | 8.7                                    | Supplemental oxygen (91.3%)<br>Hfnc and/or niv (8.7%)<br>lv and/or ecmo (0.0%) | nafamostat (4.8 mg/kg/day via 24-hour intravenous infusion for 10 days or until hospital discharge)<br>standard care | Mortality<br>Adverse effects leading to discontinuation<br>Viral clearance<br>Venous thromboembolism<br>Duration of hospitalization<br>Time to symptom/clinical improvement<br>Time to viral clearance |

| Study                           | Publication status<br>Registration          | n   | Country | Mean age | % Male | Comorbidities                            | Type of care | Severity      | % Mechanical ventilation (at baseline) | Detailed ventilation (%)                               | Treatments (dose and duration)                                                         | Outcomes                                                                                                                               |
|---------------------------------|---------------------------------------------|-----|---------|----------|--------|------------------------------------------|--------------|---------------|----------------------------------------|--------------------------------------------------------|----------------------------------------------------------------------------------------|----------------------------------------------------------------------------------------------------------------------------------------|
| de Alencar, 2020 <sup>383</sup> | Peer-reviewed publication<br>U1111-1250-356 | 140 | Brazil  | 58.5     | 59.3   | Diabetes (37.8%)<br>Hypertension (46.7%) | Inpatient    | Severe (100%) | 0.7                                    | Supplemental oxygen (68.2%)<br>High-flow or niv (0.7%) | N-acetylcysteine (14 g in the first 4 hours, then 7 g in the next 16 hours)<br>placebo | Mortality<br>Mechanical ventilation<br>Adverse effects leading to discontinuation<br>Duration of hospitalization<br>ICU length of stay |

( ), empty parentheses indicate that dosing data was not available for that intervention

1. The WHO Rapid Evidence Appraisal for COVID-19 Therapies Working Group. Association Between Administration of IL-6 Antagonists and Mortality Among Patients Hospitalized for COVID-19: A Meta-analysis. *JAMA* 2021;326(6):499-518. doi: 10.1001/jama.2021.11330
2. Abbasi F, Adatorwovor R, Davarpanah MA, et al. A Randomized Single Blind Controlled Trial of Combination Therapy (Spironolactone and Sitagliptin) in Hospitalized Adult Patients with Covid-19. *SSRN Electronic Journal* 2021 doi: 10.2139/ssrn.3889411
3. Abbass S, Kamal E, Salama M, et al. Efficacy and safety of sofosbuvir plus daclatasvir or ravidasvir in patients with COVID-19: A randomized controlled trial. *J Med Virol* 2021;93(12):6750-59. doi: 10.1002/jmv.27264 [published Online First: 20210824]
4. Abd-Elsalam S, Esmail ES, Khalaf M, et al. Hydroxychloroquine in the Treatment of COVID-19: A Multicenter Randomized Controlled Study. *Am J Trop Med Hyg* 2020;103(4):1635-39. doi: 10.4269/ajtmh.20-0873
5. Abd-Elsalam S, Soliman S, Esmail ES, et al. Do Zinc Supplements Enhance the Clinical Efficacy of Hydroxychloroquine?: a Randomized, Multicenter Trial. *Biol trace elem res* 2020
6. Abd-Elsalam S, Noor RA, Badawi R, et al. Clinical study evaluating the efficacy of ivermectin in COVID-19 treatment: A randomized controlled study. *J Med Virol* 2021;93(10):5833-38. doi: 10.1002/jmv.27122 [published Online First: 20210607]
7. Abd-Elsalam S, Ahmed OA, Mansour NO, et al. Remdesivir Efficacy in COVID-19 Treatment: A Randomized Controlled Trial. *The American Journal of Tropical Medicine and Hygiene* 2021:tpmd210606. doi: 10.4269/ajtmh.21-0606
8. Abdeen S, Abu-Fanne R, Bdeir K, et al. Conflicting impacts of tocilizumab and colchicine in COVID-19-associated coagulop. *British Journal of Haematology* 2021 doi: <http://dx.doi.org/10.1111/bjh.17885>
9. Abdelalim AA, Mohamady AA, Elsayed RA, et al. Corticosteroid nasal spray for recovery of smell sensation in COVID-19 patients: A randomized controlled trial. *Am J Otolaryngol* 2021;42(2):102884. doi: 10.1016/j.amjoto.2020.102884 [published Online First: 20210104]
10. Shahbaznejad L, Davoudi A, Eslami G, et al. Effects of Ivermectin in Patients With COVID-19: A Multicenter, Double-blind, Randomized, Controlled Clinical Trial. *Clin Ther* 2021;43(6):1007-19. doi: 10.1016/j.clinthera.2021.04.007 [published Online First: 20210506]

11. Abdulmir AS, Gorial FI, Saadi SJ, et al. Effectiveness and Safety of Niclosamaide as Add-on Therapy to the Standard of Care Measures in COVID-19 Management: Randomized controlled clinical trial. *medRxiv* 2021:2021.06.10.21258709. doi: 10.1101/2021.06.10.21258709
12. Abdulmir AS, Gorial FI, Saadi SJ, et al. A randomised controlled trial of effectiveness and safety of Niclosamide as add on therapy to the standard of care measures in COVID-19 management. *Ann Med Surg (Lond)* 2021;69:102779. doi: 10.1016/j.amsu.2021.102779 [published Online First: 20210904]
13. Abulmeaty MMA, Aljuraiban GS, Shaikh SM, et al. The Efficacy of Antioxidant Oral Supplements on the Progression of COVID-19 in Non-Critically Ill Patients: A Randomized Controlled Trial. *Antioxidants (Basel)* 2021;10(5) doi: 10.3390/antiox10050804 [published Online First: 20210519]
14. Ader F, Peiffer-Smadja N, Poissy J, et al. An open-label randomized controlled trial of the effect of lopinavir/ritonavir, lopinavir/ritonavir plus IFN-beta-1a and hydroxychloroquine in hospitalized patients with COVID-19. *Clin Microbiol Infect* 2021;27(12):1826-37. doi: 10.1016/j.cmi.2021.05.020 [published Online First: 20210526]
15. Ader F, Bouscambert-Duchamp M, Hites M, et al. Remdesivir plus standard of care versus standard of care alone for the treatment of patients admitted to hospital with COVID-19 (DisCoVeRy): a phase 3, randomised, controlled, open-label trial. *The Lancet Infectious Diseases* doi: 10.1016/S1473-3099(21)00485-0
16. Ahmadi R, Salari S, Sharifi MD, et al. Oral nano-curcumin formulation efficacy in the management of mild to moderate outpatient COVID-19: A randomized triple-blind placebo-controlled clinical trial. *Food Sci Nutr* 2021;9(8):4068-75. doi: 10.1002/fsn3.2226 [published Online First: 20210619]
17. Ahmed S, Karim MM, Ross AG, et al. A five-day course of ivermectin for the treatment of COVID-19 may reduce the duration of illness. *Int J Infect Dis* 2021;103:214-16. doi: 10.1016/j.ijid.2020.11.191 [published Online First: 20201202]
18. Hamidi-Alamdari D, Hafizi-Lotfabadi S, Bagheri-Moghaddam A, et al. Methylene Blue for Treatment of Hospitalized Covid-19 Patients: A Randomized, Controlled, Open-Label Clinical Trial, Phase 2. *Rev Invest Clin* 2021;73(3):190-98. doi: 10.24875/RIC.21000028 [published Online First: 2021/05/22]
19. Alavi-moghaddam M, Haghighi M, Sabaghian T, et al. Safety and Efficacy of Sofosbuvir in Hospitalized Adult Patients with SARS-CoV-2: A Preliminary Report. *SSRN Electronic Journal* 2021 doi: 10.2139/ssrn.3790463
20. Algahtani FD, Elabbasy MT, Samak MA, et al. The Prospect of Lactoferrin Use as Adjunctive Agent in Management of SARS-CoV-2 Patients: A Randomized Pilot Study. *Medicina (Kaunas)* 2021;57(8) doi: 10.3390/medicina57080842 [published Online First: 20210819]
21. Alizadeh Z, Keyhanian N, Ghaderkhani S, et al. A Pilot Study on Controlling Coronavirus Disease 2019 (COVID-19) Inflammation Using Melatonin Supplement. *Iran J Allergy Asthma Immunol* 2021;20(4):494-99. [published Online First: 20210807]
22. Altay O, Arif M, Li X, et al. Combined metabolic cofactor supplementation accelerates recovery in mild-to-moderate COVID-19. *medRxiv* 2021:2020.10.02.20202614. doi: 10.1101/2020.10.02.20202614
23. Aman J, Duijvelaar E, Botros L, et al. Imatinib in patients with severe COVID-19: a randomised, double-blind, placebo-controlled, clinical trial. *Lancet Respir Med* 2021;9(9):957-68. doi: 10.1016/S2213-2600(21)00237-X [published Online First: 20210618]
24. Amaravadi RK, Giles L, Carberry M, et al. Hydroxychloroquine for SARS-CoV-2 positive patients quarantined at home: The first interim analysis of a remotely conducted randomized clinical trial. *medRxiv* 2021:2021.02.22.21252228. doi: 10.1101/2021.02.22.21252228
25. Amra B, Ashrafi F, Soltaninejad F, et al. Thalidomide for the treatment of severe Covid-19: A randomized clinical trial. *Research Square* 2021 doi: 10.21203/rs.3.rs-379635/v1
26. Ananworanich J, Mogg R, Dunne MW, et al. Randomized study of rivaroxaban vs. placebo on disease progression and symptoms resolution in high-risk adults with mild COVID-19. *Clin Infect Dis* 2021 doi: 10.1093/cid/ciab813 [published Online First: 20210915]
27. Angus DC, Derde L, Al-Beidh F, et al. Effect of Hydrocortisone on Mortality and Organ Support in Patients With Severe COVID-19: The REMAP-CAP COVID-19 Corticosteroid Domain Randomized Clinical Trial. *JAMA* 2020;324(13):1317-29. doi: 10.1001/jama.2020.17022
28. Ansarin K, Tolouian R, Ardalan M, et al. Effect of bromhexine on clinical outcomes and mortality in COVID-19 patients: A randomized clinical trial. *Bioimpacts* 2020;10(4):209-15. doi: 10.34172/bi.2020.27 [published Online First: 20200719]
29. Arabi YM, Gordon AC, Derde LPG, et al. Lopinavir-ritonavir and hydroxychloroquine for critically ill patients with COVID-19: REMAP-CAP randomized controlled trial. *Intensive Care Med* 2021;47(8):867-86. doi: 10.1007/s00134-021-06448-5 [published Online First: 20210712]
30. Aref ZF, Bazeed S, Hassan MH, et al. Clinical, Biochemical and Molecular Evaluations of Ivermectin Mucoadhesive Nanosuspension Nasal Spray in Reducing Upper Respiratory Symptoms of Mild COVID-19. *Int J Nanomedicine* 2021;16:4063-72. doi: 10.2147/IJN.S313093 [published Online First: 20210615]
31. Hasan MJ, Rumi S, Banu SS, et al. Virucidal effect of povidone iodine on COVID-19 in the nasopharynx: A structured summary of a study protocol for an open-label randomized clinical trial. *Trials* 2021;22(1):2. doi: 10.1186/s13063-020-04963-2 [published Online First: 20210104]

32. Arruda EAG, Pires-Neto RJ, Medeiros MS, et al. Clinical Trial of Efficacy and Toxicity of Disoproxil Tenofovir Fumarate and Emtricitabine for Mild to Moderate SARS-CoV-2 Infections. *medRxiv* 2021:2021.09.28.21264242. doi: 10.1101/2021.09.28.21264242
33. Asadi M, Sayar S, Radmanesh E, et al. Efficacy of naproxen in the management of patients hospitalized with COVID-19 infection: A randomized, double-blind, placebo-controlled, clinical trial. *Diabetes Metab Syndr* 2021;15(6):102319. doi: 10.1016/j.dsx.2021.102319 [published Online First: 20211022]
34. Axfors C, Schmitt AM, Janiaud P, et al. Mortality outcomes with hydroxychloroquine and chloroquine in COVID-19: an international collaborative meta-analysis of randomized trials. *medRxiv* 2020:2020.09.16.20194571. doi: 10.1101/2020.09.16.20194571
35. Azizi H, Rouhani N, Shaki F, et al. Pentoxifylline effects on hospitalized patients with COVID19: A randomized, double-blind clinical trial. *International Immunopharmacology* 2021;101:108227. doi: <https://doi.org/10.1016/j.intimp.2021.108227>
36. Babalola OE, Bode CO, Ajayi AA, et al. Ivermectin shows clinical benefits in mild to moderate COVID19: A randomised controlled double-blind, dose-response study in Lagos. *QJM* 2021 doi: 10.1093/qjmed/hcab035 [published Online First: 20210218]
37. Olufemi Emmanuel B, Ndanusa Y, Ajayi AA, et al. *Research Square* 2021 doi: 10.21203/rs.3.rs-950352/v1
38. Balykova LA, Pavelkina VF, Shmyreva NV, et al. Efficacy and Safety of Some Etiotropic Therapeutic Schemes for Treating Patients with Novel Coronavirus Infection (Covid-19). *Pharmacy & Pharmacology* 2020;8(3):150-59. doi: 10.19163/2307-9266-2020-8-3-150-159
39. Balykova LA, Granovskaya MV, Zaslavskaya KY, et al. New possibilities for targeted antiviral therapy for COVID-19. Results of a multi center clinical study of the efficacy and safety of using the drug Areplivir. *Infectious diseases: News, Opinions, Training* 2020;9(3):16-29. doi: 10.33029/2305-3496-2020-9-3-16-29
40. Barratt-Due A, Olsen IC, Nezvalova-Henriksen K, et al. Evaluation of the Effects of Remdesivir and Hydroxychloroquine on Viral Clearance in COVID-19 : A Randomized Trial. *Ann Intern Med* 2021;174(9):1261-69. doi: 10.7326/M21-0653 [published Online First: 20210713]
41. Barrett CD, Moore HB, Moore EE, et al. Study of Alteplase for Respiratory Failure in SARS-CoV-2 COVID-19: A Vanguard Multicenter, Rapidly Adaptive, Pragmatic, Randomized Controlled Trial. *Chest* 2021 doi: 10.1016/j.chest.2021.09.024 [published Online First: 20210927]
42. Bauer A, Schreinlechner M, Sappler N, et al. Discontinuation versus continuation of renin-angiotensin-system inhibitors in COVID-19 (ACEI-COVID): a prospective, parallel group, randomised, controlled, open-label trial. *Lancet Respir Med* 2021;9(8):863-72. doi: 10.1016/S2213-2600(21)00214-9 [published Online First: 20210611]
43. Baxter AL, Schwartz KR, Johnson RW, et al. Rapid initiation of nasal saline irrigation to reduce severity in high-risk COVID+ outpatients: a randomized clinical trial compared to a national dataset observational arm. *medRxiv* 2021:2021.08.16.21262044. doi: 10.1101/2021.08.16.21262044
44. Beigel JH, Tomashek KM, Dodd LE, et al. Remdesivir for the Treatment of Covid-19 - Final Report. *N Engl J Med* 2020;383(19):1813-26. doi: 10.1056/NEJMoa2007764 [published Online First: 20201008]
45. Bhatt AN, Shenoy S, Munjal S, et al. 2-Deoxy-D-Glucose as an Adjunct to Standard of Care in the Medical Management of COVID-19: A Proof-of-Concept & Dose-Ranging Randomised Clinical Trial. *medRxiv* 2021:2021.10.08.21258621. doi: 10.1101/2021.10.08.21258621
46. Pandit A, Bhalani N, Bhushan BLS, et al. Efficacy and safety of pegylated interferon alfa-2b in moderate COVID-19: A phase II, randomized, controlled, open-label study. *Int J Infect Dis* 2021;105:516-21. doi: 10.1016/j.ijid.2021.03.015 [published Online First: 20210310]
47. Bikdeli B, Talasaz AH, Rashidi F, et al. Intermediate-Dose versus Standard-Dose Prophylactic Anticoagulation in Patients with COVID-19 Admitted to the Intensive Care Unit: 90-Day Results from the INSPIRATION Randomized Trial. *Thromb Haemost* 2021 doi: 10.1055/a-1485-2372 [published Online First: 20210417]
48. Blum VF, Cimerman S, Hunter JR, et al. Nitazoxanide superiority to placebo to treat moderate COVID-19 - A Pilot prove of concept randomized double-blind clinical trial. *EClinicalMedicine* 2021;37:100981. doi: 10.1016/j.eclinm.2021.100981 [published Online First: 20210627]
49. Bosaeed M, Mahmoud E, Alharbi A, et al. Favipiravir and Hydroxychloroquine Combination Therapy in Patients with Moderate to Severe COVID-19 (FACCT Trial): An Open-Label, Multicenter, Randomized, Controlled Trial. *Infect Dis Ther* 2021;10(4):2291-307. doi: 10.1007/s40121-021-00496-6 [published Online First: 20210728]
50. Brown SM, Peltan I, Kumar N, et al. Hydroxychloroquine vs. Azithromycin for Hospitalized Patients with COVID-19 (HAHPS): Results of a Randomized, Active Comparator Trial. *Ann Am Thorac Soc* 2020 doi: 10.1513/AnnalsATS.202008-940OC [published Online First: 20201109]
51. Shah Bukhari KH, Asghar A, Perveen N, et al. Efficacy of Ivermectin in COVID-19 Patients with Mild to Moderate Disease. *medRxiv* 2021:2021.02.02.21250840. doi: 10.1101/2021.02.02.21250840
52. Buonfrate DaC, Fabio and Martini, Davide and Roncaglioni, Maria Carla and Ojeda Fernandez, Maria Luisa and Alvisi, Maria Francesca and De Simone, Irene and Rulli, Eliana and Nobili, Alessandro and Casalini, Giacomo and Antinori, Spinello and Gobbi, Marco and Campoli, Caterina and Deiana, Michela and Pomari, Elena and Lunardi, Gianluigi and Tessari, Roberto and Bisoffi, Zeno,. High Dose

- Ivermectin for the Early Treatment of COVID-19 (COVER Study): A Randomised, Double-Blind, Multicentre, Phase II, Dose-Finding, Proof of Concept Clinical Trial. . *SSRN Electronic Journal* 2021 doi: <http://dx.doi.org/10.2139/ssrn.3918289> [published Online First: 06 Sep 2021]
53. Butler CC, Yu LM, Dorward J, et al. Doxycycline for community treatment of suspected COVID-19 in people at high risk of adverse outcomes in the UK (PRINCIPLE): a randomised, controlled, open-label, adaptive platform trial. *Lancet Respir Med* 2021;9(9):1010-20. doi: 10.1016/s2213-2600(21)00310-6 [published Online First: 20210727]
  54. Byakika-Kibwika P, Sekaggya-Wiltshire C, Semakula JR, et al. Safety and efficacy of hydroxychloroquine for treatment of non-severe COVID-19 among adults in Uganda: a randomized open label phase II clinical trial. *BMC Infect Dis* 2021;21(1):1218. doi: 10.1186/s12879-021-06897-9 [published Online First: 20211206]
  55. Mariette X, Hermine O, Tharaux P-L, et al. Sarilumab in adults hospitalised with moderate-to-severe COVID-19 pneumonia (CORIMUNO-SARI-1): An open-label randomised controlled trial. *The Lancet Rheumatology* doi: 10.1016/S2665-9913(21)00315-5
  56. Cadegiani F, McCoy J, Wambier C, et al. Early Antiandrogen Therapy With Dutasteride Reduces Viral Shedding, Inflammatory Responses, and Time-to-Remission in Males With COVID-19: A Randomized, Double-Blind, Placebo-Controlled Interventional Trial (EAT-DUTA AndroCoV Trial – Biochemical). (February 01, 2021) *Cureus* 13(2): e13047 doi:107759/cureus13047 2021
  57. Cadegiani FA, McCoy J, Wambier CG, et al. Proxalutamide (GT0918) Reduces the Rate of Hospitalization and Death in COVID-19 Male Patients: A Randomized Double-Blinded Placebo-Controlled Trial., 29 December 2020, PREPRINT (Version 1). Available at Research Square [<https://doi.org/10.21203/rs3rs-135303/v1>] 2020
  58. Cadegiani FA, McCoy J, Gustavo Wambier C, et al. Proxalutamide Significantly Accelerates Viral Clearance and Reduces Time to Clinical Remission in Patients with Mild to Moderate COVID-19: Results from a Randomized, Double-Blinded, Placebo-Controlled Trial. *Cureus* 2021;13(2):e13492. doi: 10.7759/cureus.13492 [published Online First: 20210222]
  59. Cadegiani FA, Zimerman RA, do Nascimento Fonseca D, et al. Proxalutamide (GT0918) Reduces the Rate of Hospitalization in mild-to-moderate COVID-19 Female Patients: A Randomized Double-Blinded Placebo-Controlled Two-Arm Parallel Trial. *medRxiv* 2021:2021.07.06.21260086. doi: 10.1101/2021.07.06.21260086
  60. Cadegiani FA, do Nascimento Fonseca D, McCoy J, et al. Efficacy of Proxalutamide in Hospitalized COVID-19 Patients: A Randomized, Double-Blind, Placebo-Controlled, Parallel-Design Clinical Trial. *medRxiv* 2021:2021.06.22.21259318. doi: 10.1101/2021.06.22.21259318
  61. Cao B, Wang Y, Wen D, et al. A Trial of Lopinavir-Ritonavir in Adults Hospitalized with Severe Covid-19. *N Engl J Med* 2020;382(19):1787-99. doi: 10.1056/NEJMoa2001282 [published Online First: 20200318]
  62. Cao Y, Wei J, Zou L, et al. Ruxolitinib in treatment of severe coronavirus disease 2019 (COVID-19): A multicenter, single-blind, randomized controlled trial. *J Allergy Clin Immunol* 2020;146(1):137-46 e3. doi: 10.1016/j.jaci.2020.05.019 [published Online First: 20200526]
  63. Caricchio R, Abbate A, Gordeev I, et al. Effect of Canakinumab vs Placebo on Survival Without Invasive Mechanical Ventilation in Patients Hospitalized With Severe COVID-19: A Randomized Clinical Trial. *JAMA* 2021;326(3):230-39. doi: 10.1001/jama.2021.9508 [published Online First: 2021/07/21]
  64. Carrouel F, Valette M, Gadea E, et al. Use of an antiviral mouthwash as a barrier measure in the SARS-CoV-2 transmission in adults with asymptomatic to mild COVID-19: a multicentre, randomized, double-blind controlled trial. *Clin Microbiol Infect* 2021;27(10):1494-501. doi: 10.1016/j.cmi.2021.05.028 [published Online First: 20210524]
  65. Castillo ME, Entrenas Costa LM, Vaquero Barrios JMADJF, et al. Effect of Calcifediol Treatment and best Available Therapy versus best Available Therapy on Intensive Care Unit Admission and Mortality Among Patients Hospitalized for COVID-19: A Pilot Randomized Clinical study. *Journal of Steroid Biochemistry and Molecular Biology* 2020
  66. Cavalcanti AB, Zampieri FG, Rosa RG, et al. Hydroxychloroquine with or without Azithromycin in Mild-to-Moderate Covid-19. *N Engl J Med* 2020;383(21):2041-52. doi: 10.1056/NEJMoa2019014 [published Online First: 20200723]
  67. Chaccour C, Casellas A, Blanco-Di Matteo A, et al. The effect of early treatment with ivermectin on viral load, symptoms and humoral response in patients with non-severe COVID-19: A pilot, double-blind, placebo-controlled, randomized clinical trial. *EClinicalMedicine* 2021;32:100720. doi: 10.1016/j.eclinm.2020.100720 [published Online First: 20210119]
  68. Zeeshan Khan Chachar A, Ahmad Khan K, Asif M, et al. Effectiveness of Ivermectin in SARS-CoV-2/COVID-19 Patients. *International Journal of Sciences* 2020;9(09):31-35. doi: 10.18483/ijsci.2378
  69. Cluster Randomised Trials - Ivermectin Repurposing For COVID-19 Treatment Of Outpatients With Mild Disease In Primary Health Care Centers; 2021.
  70. Chaudhary P, Melkonyan A, Meethil A, et al. Estimating salivary carriage of severe acute respiratory syndrome coronavirus 2 in nonsymptomatic people and efficacy of mouthrinse in reducing viral load: A randomized controlled trial. *J Am Dent Assoc* 2021;152(11):903-08. doi: 10.1016/j.adaj.2021.05.021 [published Online First: 20210611]
  71. Chen Z, Hu J, Zhang Z, et al. Efficacy of hydroxychloroquine in patients with COVID-19: results of a randomized clinical trial. *medRxiv* 2020:2020.03.22.20040758. doi: 10.1101/2020.03.22.20040758
  72. Chen C, Zhang Y, Huang J, et al. Favipiravir versus Arbidol for COVID-19: A Randomized Clinical Trial. *medRxiv* 2020:2020.03.17.20037432. doi: 10.1101/2020.03.17.20037432
  73. Chen J, Liu D, Liu L, et al. A pilot study of hydroxychloroquine in treatment of patients with moderate COVID-19. *Zhejiang Da Xue Xue Bao Yi Xue Ban* 2020;49(2):215-19. doi: 10.3785/j.issn.1008-9292.2020.03.03

74. Chen L, Zhang Z-Y, Fu J-G, et al. Efficacy and safety of chloroquine or hydroxychloroquine in moderate type of COVID-19: a prospective open-label randomized controlled study. *medRxiv* 2020:2020.06.19.20136093. doi: 10.1101/2020.06.19.20136093
75. Chen CP, Lin YC, Chen TC, et al. A multicenter, randomized, open-label, controlled trial to evaluate the efficacy and tolerability of hydroxychloroquine and a retrospective study in adult patients with mild to moderate coronavirus disease 2019 (COVID-19). *PLoS One* 2020;15(12):e0242763. doi: 10.1371/journal.pone.0242763 [published Online First: 20201202]
76. Cheng LL, Guan WJ, Duan CY, et al. Effect of Recombinant Human Granulocyte Colony-Stimulating Factor for Patients With Coronavirus Disease 2019 (COVID-19) and Lymphopenia: A Randomized Clinical Trial. *JAMA Intern Med* 2021;181(1):71-78. doi: 10.1001/jamainternmed.2020.5503
77. Clemency BM, Varughese R, Gonzalez-Rojas Y, et al. A randomized controlled trial of inhaled ciclesonide for outpatient treatment of symptomatic COVID-19 infections. *medRxiv* 2021:2021.09.07.21261811. doi: 10.1101/2021.09.07.21261811
78. Cohen JB, Hanff TC, William P, et al. Continuation versus discontinuation of renin-angiotensin system inhibitors in patients admitted to hospital with COVID-19: a prospective, randomised, open-label trial. *Lancet Respir Med* 2021;9(3):275-84. doi: 10.1016/S2213-2600(20)30558-0 [published Online First: 20210107]
79. Connors JM, Brooks MM, Sciruba FC, et al. Effect of Antithrombotic Therapy on Clinical Outcomes in Outpatients With Clinically Stable Symptomatic COVID-19: The ACTIV-4B Randomized Clinical Trial. *Jama* 2021;326(17):1703-12. doi: 10.1001/jama.2021.17272
80. Corral-Gudino L, Bahamonde A, Arnaiz-Revillas F, et al. Methylprednisolone in adults hospitalized with COVID-19 pneumonia : An open-label randomized trial (GLUCOCOVID). *Wien Klin Wochenschr* 2021;133(7-8):303-11. doi: 10.1007/s00508-020-01805-8 [published Online First: 20210203]
81. Cremer PC, Sheng C, Sahoo D, et al. Canakinumab to Reduce Deterioration of Cardiac and Respiratory Function in Sars-cov2 Associated Myocardial Injury With Heightened Inflammation (canakinumab in Covid-19 Cardiac Injury): Results From the Randomized Three C Study. *2020 AHA LATE-BREAKING SCIENCE ABSTRACTS* 2020
82. Cremer PC, Abbate A, Hudock K, et al. Mavrilimumab in patients with severe COVID-19 pneumonia and systemic hyperinflammation (MASH-COVID): an investigator initiated, multicentre, double-blind, randomised, placebo-controlled trial. *Lancet Rheumatol* 2021;3(6):e410-e18. doi: 10.1016/S2665-9913(21)00070-9 [published Online First: 20210317]
83. Criner GJ, Criner GJ, Ahn MY, et al. 561. Safety of Remdesivir vs Standard Care in Patients with Moderate Covid-19. *Open Forum Infectious Diseases* 2020;7(Supplement\_1):S345-S46. doi: 10.1093/ofid/ofaa439.755
84. Crippa JAS, Pacheco JC, Zuairi AW, et al. Cannabidiol for COVID-19 Patients with Mild to Moderate Symptoms (CANDIDATE Study): A Randomized, Double-Blind, Placebo-Controlled Clinical Trial. *Cannabis Cannabinoid Res* 2021 doi: 10.1089/can.2021.0093 [published Online First: 20211007]
85. Cruz LR, Baladron I, Rittolles A, et al. Treatment with an Anti-CK2 Synthetic Peptide Improves Clinical Response in COVID-19 Patients with Pneumonia. A Randomized and Controlled Clinical Trial. *ACS Pharmacol Transl Sci* 2021;4(1):206-12. doi: 10.1021/acscptsci.0c00175 [published Online First: 20201211]
86. Darazam IA, Hatami F, Rabiei MM, et al. An Investigation Into the Beneficial Effects of High-Dose Interferon beta 1-a, Compared to Low-Dose Interferon Beta 1-a (the base therapeutic regimen) in moderate to severe COVID-19, 21 January 2021, PREPRINT (Version 2). Available at Research Square [<https://doi.org/10.21203/rs3rs-138540/v2>] 2021
87. Darazam IA, Pourhoseingholi MA, Shokouhi S, et al. Role of Interferon Therapy in Severe COVID-19: The COVIFERON Randomized Controlled Trial, 04 January 2021, PREPRINT (Version 1). Available at Research Square [<https://doi.org/10.21203/rs3rs-136499/v1>] 2021
88. Alavi Darazam I, Shokouhi S, Mardani M, et al. Umifenovir in hospitalized moderate to severe COVID-19 patients: A randomized clinical trial. *International Immunopharmacology* 2021;99:107969. doi: <https://doi.org/10.1016/j.intimp.2021.107969>
89. Darban M, Malek F, Memarian M, et al. Efficacy of High Dose Vitamin C, Melatonin and Zinc in Iranian Patients with Acute Respiratory Syndrome due to Coronavirus Infection: A Pilot Randomized Trial. *Journal of Cellular & Molecular Anesthesia* 2020;6(2):164-67. doi: 10.22037/jcma.v6i2.32182
90. Davoodi L, Abedi SM, Salehifar E, et al. Febuxostat therapy in outpatients with suspected COVID-19: A clinical trial. *Int J Clin Pract* 2020;74(11):e13600. doi: 10.1111/ijcp.13600 [published Online First: 20200717]
91. Davoodi L, Jafarpour H, Oladi Z, et al. Atorvastatin therapy in COVID-19 adult inpatients: A double-blind, randomized controlled trial. *Int J Cardiol Heart Vasc* 2021;36:100875. doi: 10.1016/j.ijcha.2021.100875 [published Online First: 20210914]
92. Davoodian NaS, Farnoosh and Salarbashi, Davoud and Elyasi, Sepideh and Baniasad, Amir and Bejestani, Farhang Soltani. The Effect of Melatonin as an Adjuvant Therapy on COVID-19: A Randomized Clinical Trial. *SSRN Electronic Journal* 2021 doi: <http://dx.doi.org/10.2139/ssrn.3878090> [published Online First: 01 Jul 2021]
93. Davoudi-Monfared E, Rahmani H, Khalili H, et al. A Randomized Clinical Trial of the Efficacy and Safety of Interferon beta-1a in Treatment of Severe COVID-19. *Antimicrob Agents Chemother* 2020;64(9):20. doi: 10.1128/AAC.01061-20 [published Online First: 20200820]

94. Deftereos SG, Giannopoulos G, Vrachatis DA, et al. Effect of Colchicine vs Standard Care on Cardiac and Inflammatory Biomarkers and Clinical Outcomes in Patients Hospitalized With Coronavirus Disease 2019: The GRECCO-19 Randomized Clinical Trial. *JAMA Netw Open* 2020;3(6):e2013136. doi: 10.1001/jamanetworkopen.2020.13136 [published Online First: 20200601]
95. Delgado-Enciso I, Paz-Garcia J, Barajas-Saucedo CE, et al. Safety and efficacy of a COVID-19 treatment with nebulized and/or intravenous neutral electrolyzed saline combined with usual medical care vs. usual medical care alone: A randomized, open-label, controlled trial. *Exp Ther Med* 2021;22(3):915. doi: 10.3892/etm.2021.10347 [published Online First: 20210629]
96. Dequin PF, Heming N, Meziani F, et al. Effect of Hydrocortisone on 21-Day Mortality or Respiratory Support Among Critically Ill Patients With COVID-19: A Randomized Clinical Trial. *JAMA* 2020;324(13):1298-306. doi: 10.1001/jama.2020.16761
97. Domênico MBD, Collares K, Santos RBD, et al. Hydrogen peroxide as an auxiliary treatment for COVID-19 in Brazil: a randomized double-blind clinical trial. *Epidemiol Health* 2021;43:e2021051. doi: 10.4178/epih.e2021051 [published Online First: 20210803]
98. Di Pierro F, Derosa G, Maffioli P, et al. Possible Therapeutic Effects of Adjuvant Quercetin Supplementation Against Early-Stage COVID-19 Infection: A Prospective, Randomized, Controlled, and Open-Label Study. *Int J Gen Med* 2021;14:2359-66. doi: 10.2147/IJGM.S318720 [published Online First: 20210608]
99. Di Pierro F, Iqtadar S, Khan A, et al. Potential Clinical Benefits of Quercetin in the Early Stage of COVID-19: Results of a Second, Pilot, Randomized, Controlled and Open-Label Clinical Trial. *Int J Gen Med* 2021;14:2807-16. doi: 10.2147/IJGM.S318949 [published Online First: 20210624]
100. Doaei S, Gholami S, Rastgoo S, et al. The effect of omega-3 fatty acid supplementation on clinical and biochemical parameters of critically ill patients with COVID-19: a randomized clinical trial. *J Transl Med* 2021;19(1):128. doi: 10.1186/s12967-021-02795-5 [published Online First: 20210329]
101. Doi Y, Hibino M, Hase R, et al. A Prospective, Randomized, Open-Label Trial of Early versus Late Favipiravir Therapy in Hospitalized Patients with COVID-19. *Antimicrob Agents Chemother* 2020;64(12) doi: 10.1128/AAC.01897-20 [published Online First: 20201117]
102. PRINCIPLE Trial Collaborative Group, Dorward J, Yu L-M, et al. Colchicine for COVID-19 in adults in the community (PRINCIPLE): a randomised, controlled, adaptive platform trial. *medRxiv* 2021:2021.09.20.21263828. doi: 10.1101/2021.09.20.21263828
103. Duarte M, Pelorosso FG, Nicolosi L, et al. Telmisartan for treatment of Covid-19 patients: an open randomized clinical trial. Preliminary report (preprint). *medRxiv* 2020:2020.08.04.20167205. doi: 10.1101/2020.08.04.20167205
104. Dubee V, Roy PM, Vielle B, et al. Hydroxychloroquine in mild-to-moderate coronavirus disease 2019: a placebo-controlled double blind trial. *Clin Microbiol Infect* 2021;27(8):1124-30. doi: 10.1016/j.cmi.2021.03.005 [published Online First: 20210401]
105. World Health Organization. Unpublished data for EPIC-HR (NCT04960202), 2021.
106. Edalatifard M, Akhtari M, Salehi M, et al. Intravenous methylprednisolone pulse as a treatment for hospitalised severe COVID-19 patients: results from a randomised controlled clinical trial. *Eur Respir J* 2020;56(6) doi: 10.1183/13993003.02808-2020 [published Online First: 20201224]
107. Eid RA, Elgendy MO, El-Gendy AO, et al. Efficacy of Ceftazidime and Cefepime in the Management of COVID-19 Patients: Single Center Report from Egypt. *Antibiotics* 2021;10(11):1278.
108. El-Bendary M, Abd-Elsalam S, Elbaz T, et al. Efficacy of combined Sofosbuvir and Daclatasvir in the treatment of COVID-19 patients with pneumonia: a multicenter Egyptian study. *Expert Rev Anti Infect Ther* 2021:1-5. doi: 10.1080/14787210.2021.1950532 [published Online First: 20210715]
109. Elamir Y, Amir H, Feliciano N, et al. Abstract #1002919: Endocrine Therapy for COVID19: A Randomized Pilot Study Using Calcitriol. *Endocrine Practice* 2021;27:S79 - S79.
110. Elgohary MA-S, Hasan EM, Ibrahim AA, et al. Efficacy of Sofosbuvir plus Ledipasvir in Egyptian patients with COVID-19 compared to standard treatment: Randomized controlled trial. *medRxiv* 2021 doi: 10.1101/2021.05.19.21257429
111. Ely EW, Ramanan AV, Kartman CE, et al. Baricitinib plus Standard of Care for Hospitalised Adults with COVID-19 on Invasive Mechanical Ventilation or Extracorporeal Membrane Oxygenation: Results of a Randomised, Placebo-Controlled Trial. *medRxiv* 2021:2021.10.11.21263897. doi: 10.1101/2021.10.11.21263897
112. Idelsis E-MI, J P-E, Y D-R, et al. Effect and safety of combination of interferon alpha-2b and gamma or interferon alpha-2b for negativization of SARS-CoV-2 viral RNA. Preliminary results of a randomized controlled clinical trial. *medRxiv* 2020:2020.07.29.20164251. doi: 10.1101/2020.07.29.20164251
113. Esther CR, Kimura KS, Mikami Y, et al. Pharmacokinetic-based failure of a detergent virucidal for SARS-COV-2 nasal infections. *Res Sq* 2021 doi: 10.21203/rs.3.rs-500168/v1 [published Online First: 20210514]
114. Ezer N, Belga S, Daneman N, et al. Inhaled and intranasal ciclesonide for the treatment of covid-19 in adult outpatients: CONTAIN phase II randomised controlled trial. *BMJ* 2021;375:e068060. doi: 10.1136/bmj-2021-068060

115. Fakharian A, Barati S, Mirenayat M, et al. Evaluation of adalimumab effects in managing severe cases of COVID-19: A randomized controlled trial. *Int Immunopharmacol* 2021;99:107961. doi: 10.1016/j.intimp.2021.107961 [published Online First: 20210707]
116. Farahani RH MR, Nezami-Asl A et al. . Evaluation of the Efficacy of Methylprednisolone Pulse Therapy in Treatment of Covid-19 Adult Patients with Severe Respiratory Failure: Randomized, Clinical Trial,. 09 September 2020, PREPRINT (Version 1) available at Research Square [+<https://doi.org/10.21203/rs.3.rs-66909/v1>] 2020
117. Farnoosh G, Akbariqomi M, Badri T, et al. Efficacy of a Low Dose of Melatonin as an Adjunctive Therapy in Hospitalized Patients with COVID-19: A Randomized, Double-blind Clinical Trial. *Arch Med Res* 2021 doi: 10.1016/j.arcmed.2021.06.006 [published Online First: 20210623]
118. Feld JJ, Kandel C, Biondi MJ, et al. Peginterferon lambda for the treatment of outpatients with COVID-19: a phase 2, placebo-controlled randomised trial. *Lancet Respir Med* 2021;9(5):498-510. doi: 10.1016/S2213-2600(20)30566-X [published Online First: 20210205]
119. Fiorentino G, Coppola A, Izzo R, et al. Effects of adding L-arginine orally to standard therapy in patients with COVID-19: A randomized, double-blind, placebo-controlled, parallel-group trial. Results of the first interim analysis. *EClinicalMedicine* 2021;40 doi: 10.1016/j.eclinm.2021.101125
120. Fischer W, Eron JJ, Holman W, et al. Molnupiravir, an Oral Antiviral Treatment for COVID-19. *medRxiv* 2021 doi: 10.1101/2021.06.17.21258639 [published Online First: 20210617]
121. Fisher BA, Veenith T, Slade D, et al. Namilumab or infliximab compared to standard of care in hospitalised patients with COVID-19 (CATALYST): a phase 2 randomised adaptive trial. *medRxiv* 2021:2021.06.02.21258204. doi: 10.1101/2021.06.02.21258204
122. Fragoso-Saavedra S, Núñez I, Audelo-Cruz BM, et al. Pyridostigmine in adults with severe SARS-CoV-2 infection: the PISCO trial. *medRxiv* 2021:2021.04.28.21255834. doi: 10.1101/2021.04.28.21255834
123. Fu W, Liu Y, Liu L, et al. An open-label, randomized trial of the combination of IFN-kappa plus TFF2 with standard care in the treatment of patients with moderate COVID-19. *EClinicalMedicine* 2020;27:100547. doi: 10.1016/j.eclinm.2020.100547 [published Online First: 20200920]
124. Furtado RHM, Berwanger O, Fonseca HA, et al. Azithromycin in addition to standard of care versus standard of care alone in the treatment of patients admitted to the hospital with severe COVID-19 in Brazil (COALITION II): a randomised clinical trial. *Lancet* 2020;396(10256):959-67. doi: 10.1016/S0140-6736(20)31862-6 [published Online First: 20200905]
125. Gaitán-Duarte HG, Álvarez-Moreno C, Rincón-Rodríguez CJ, et al. Effectiveness of Rosuvastatin plus Colchicine, Emtricitabine/Tenofovir and a combination of them in Hospitalized Patients with SARS Covid-19. *medRxiv* 2021:2021.07.06.21260085. doi: 10.1101/2021.07.06.21260085
126. Galan LEB, Santos NMD, Asato MS, et al. Phase 2 randomized study on chloroquine, hydroxychloroquine or ivermectin in hospitalized patients with severe manifestations of SARS-CoV-2 infection. *Pathog Glob Health* 2021;115(4):235-42. doi: 10.1080/20477724.2021.1890887 [published Online First: 20210308]
127. Geriak M, Haddad F, Kullar R, et al. Randomized Prospective Open Label Study Shows No Impact on Clinical Outcome of Adding Losartan to Hospitalized COVID-19 Patients with Mild Hypoxemia. *Infect Dis Ther* 2021;10(3):1323-30. doi: 10.1007/s40121-021-00453-3 [published Online First: 20210511]
128. Ghaderkhani S, khameshan A, Salami A, et al. Efficacy and Safety of Arbidol in Treatment of Patients with COVID-19 Infection: A Randomized Clinical Trial. *Research Square* 2020 doi: 10.21203/rs.3.rs-91430/v1
129. Ghandehari S, Matusov Y, Pepkowitz S, et al. Progesterone in Addition to Standard of Care vs Standard of Care Alone in the Treatment of Men Hospitalized With Moderate to Severe COVID-19: A Randomized, Controlled Pilot Trial. *Chest* 2021;160(1):74-84. doi: 10.1016/j.chest.2021.02.024 [published Online First: 20210220]
130. Ghanei M, Solaymani-Dodaran M, Qazvini A, et al. The efficacy of corticosteroids therapy in patients with moderate to severe SARS-CoV-2 infection: a multicenter, randomized, open-label trial. *Respiratory Research* 2021;22(1):245. doi: 10.1186/s12931-021-01833-6
131. Nirmal G, Siddharthan D, Sushma B, et al. A Randomised Control Trial of Statin and Aspirin as Adjuvant Therapy in Patients with SARS-CoV-2 Infection (RESIST Trial). *SSRN* 2021 doi: 10.2139/ssrn.3820512
132. Goldman JD, Lye DCB, Hui DS, et al. Remdesivir for 5 or 10 Days in Patients with Severe Covid-19. *N Engl J Med* 2020;383(19):1827-37. doi: 10.1056/NEJMoa2015301 [published Online First: 20200527]
133. Gonzalez Ochoa A, Raffetto J, Hernandez aG, et al. Sulodexide in the treatment of patients with early stages of COVID-19: a randomised controlled trial, 2020.
134. Gonzalez JLB, González Gámez M, Enciso EAM, et al. Efficacy and safety of Ivermectin and Hydroxychloroquine in patients with severe COVID-19. A randomized controlled trial. *medRxiv* 2021:2021.02.18.21252037. doi: 10.1101/2021.02.18.21252037
135. Gordon AC, Mouncey PR, Al-Beidh F, et al. Interleukin-6 Receptor Antagonists in Critically Ill Patients with Covid-19 – Preliminary report. *medRxiv* 2021:2021.01.07.21249390. doi: 10.1101/2021.01.07.21249390
136. Investigators TR-C, Derde LPG. Effectiveness of Tocilizumab, Sarilumab, and Anakinra for critically ill patients with COVID-19 The REMAP-CAP COVID-19 Immune Modulation Therapy Domain Randomized Clinical Trial. *medRxiv* 2021:2021.06.18.21259133. doi: 10.1101/2021.06.18.21259133

137. Hill JA, Paredes R, Vaca C, et al. LB1. Remdesivir for the Treatment of High-Risk Non-Hospitalized Individuals With COVID-19: A Randomized, Double-Blind, Placebo-Controlled Trial. *Open Forum Infectious Diseases* 2021;8(Supplement\_1):S806-S07. doi: 10.1093/ofid/ofab466.1642
138. Gottlieb RL, Vaca CE, Paredes R, et al. Early Remdesivir to Prevent Progression to Severe Covid-19 in Outpatients. *New England Journal of Medicine* 2021;386(4):305-15. doi: 10.1056/NEJMoa2116846
139. Guimaraes PO, Quirk D, Furtado RH, et al. Tofacitinib in Patients Hospitalized with Covid-19 Pneumonia. *N Engl J Med* 2021;385(5):406-15. doi: 10.1056/NEJMoa2101643 [published Online First: 20210616]
140. Gunst JD, Staerke NB, Pahus MH, et al. Efficacy of the TMPRSS2 inhibitor camostat mesilate in patients hospitalized with Covid-19-a double-blind randomized controlled trial. *EClinicalMedicine* 2021;35:100849. doi: 10.1016/j.eclinm.2021.100849 [published Online First: 20210422]
141. Gutiérrez-Castrellón P, Gandara-Martí T, Abreu AT, et al. Efficacy and safety of novel probiotic formulation in adult Covid19 outpatients: a randomized, placebo-controlled clinical trial. *medRxiv* 2021:2021.05.20.21256954. doi: 10.1101/2021.05.20.21256954
142. Guvenmez O, Keskin H, Ay B, et al. The comparison of the effectiveness of lincocin(R) and azitro(R) in the treatment of covid-19-associated pneumonia: A prospective study. *J Popul Ther Clin Pharmacol* 2020;27(S Pt 1):e5-e10. doi: 10.15586/jptcp.v27iSP1.684 [published Online First: 20200603]
143. Hakamifard A, Id, Soltani R, et al. The effect of vitamin E and vitamin C in patients with COVID-19 pneumonia; a randomized controlled clinical trial. 2021
144. Hamed DM, Belhoul KM, Al Maazmi NA, et al. Intravenous methylprednisolone with or without tocilizumab in patients with severe COVID-19 pneumonia requiring oxygen support: A prospective comparison. *J Infect Public Health* 2021;14(8):985-89. doi: 10.1016/j.jiph.2021.06.003 [published Online First: 20210610]
145. Hasan ZT, Atrakji D, Mehuaiden DAK. The Effect of Melatonin on Thrombosis, Sepsis and Mortality Rate in COVID-19 Patients. *Int J Infect Dis* 2021;114:79-84. doi: 10.1016/j.ijid.2021.10.012 [published Online First: 20211012]
146. Hassan MH AA, Ghweil AA, et al. . Olfactory disturbances as presenting manifestation among Egyptian patients with COVID-19: Possible role of zinc. *Research Square*2020; doi:10.21203/rs.3.rs-107577/v1 2020
147. Hassaniazad M, Eftekhari E, Inchehsablagh BR, et al. A triple-blind, placebo-controlled, randomized clinical trial to evaluate the effect of curcumin-containing nanomicelles on cellular immune responses subtypes and clinical outcome in COVID-19 patients. *Phytother Res* 2021;35(11):6417-27. doi: 10.1002/ptr.7294 [published Online First: 20210919]
148. Hermine O, Mariette X, Tharaux PL, et al. Effect of Tocilizumab vs Usual Care in Adults Hospitalized With COVID-19 and Moderate or Severe Pneumonia: A Randomized Clinical Trial. *JAMA Intern Med* 2021;181(1):32-40. doi: 10.1001/jamainternmed.2020.6820
149. Hermine OaM, Xavier and Tharaux, Pierre Louis and Resche-Rigon, Matthieu and Madjlessi Simon, Tabassome and Porcher, Raphael and Ravaud, Philippe. Tocilizumab Plus Dexamethasone in Patients with Moderate-to-Severe COVID-19 Pneumonia: a Randomized Clinical Trial of the CORIMUNO-19 Study Group. *SSRN* 2021 doi: <http://dx.doi.org/10.2139/ssrn.3909736> [published Online First: 23 Aug 2020]
150. Hernandez-Cardenas C, Thirion-Romero I, Rodríguez-Llamazares S, et al. Hydroxychloroquine for the treatment of severe respiratory infection by COVID-19: A randomized controlled trial. *PLOS ONE* 2021;16(9):e0257238. doi: 10.1371/journal.pone.0257238
151. Hinks TSC, Cureton L, Knight R, et al. Azithromycin versus standard care in patients with mild-to-moderate COVID-19 (ATOMIC2): an open-label, randomised trial. *Lancet Respir Med* 2021;9(10):1130-40. doi: 10.1016/S2213-2600(21)00263-0 [published Online First: 20210709]
152. Holubovska O, Bojkova D, Elli S, et al. Enisamium is an inhibitor of the SARS-CoV-2 RNA polymerase and shows improvement of recovery in COVID-19 patients in an interim analysis of a clinical trial. *medRxiv* 2021:2021.01.05.21249237. doi: 10.1101/2021.01.05.21249237 [published Online First: 20210121]
153. Group RC, Horby P, Lim WS, et al. Dexamethasone in Hospitalized Patients with Covid-19. *N Engl J Med* 2021;384(8):693-704. doi: 10.1056/NEJMoa2021436 [published Online First: 20200717]
154. Group RC, Horby PW, Mafham M, et al. Casirivimab and imdevimab in patients admitted to hospital with COVID-19 (RECOVERY): a randomised, controlled, open-label, platform trial. *medRxiv* 2021:2021.06.15.21258542. doi: 10.1101/2021.06.15.21258542
155. Recovery Collaborative Group. Lopinavir-ritonavir in patients admitted to hospital with COVID-19 (RECOVERY): a randomised, controlled, open-label, platform trial. *Lancet* 2020;396(10259):1345-52. doi: 10.1016/S0140-6736(20)32013-4 [published Online First: 20201005]
156. Recovery Collaborative Group. Azithromycin in patients admitted to hospital with COVID-19 (RECOVERY): a randomised, controlled, open-label, platform trial. *Lancet* 2021;397(10274):605-12. doi: 10.1016/S0140-6736(21)00149-5 [published Online First: 20210202]
157. Group RC. Tocilizumab in patients admitted to hospital with COVID-19 (RECOVERY): a randomised, controlled, open-label, platform trial. *Lancet* 2021;397(10285):1637-45. doi: 10.1016/S0140-6736(21)00676-0 [published Online First: 2021/05/03]

158. Horby PW, Campbell M, Spata E, et al. Colchicine in patients admitted to hospital with COVID-19 (RECOVERY): a randomised, controlled, open-label, platform trial. *medRxiv* 2021:2021.05.18.21257267. doi: 10.1101/2021.05.18.21257267
159. Abani O, Abbas A, Abbas F, et al. Aspirin in patients admitted to hospital with COVID-19 (RECOVERY): a randomised, controlled, open-label, platform trial. *The Lancet* doi: 10.1016/S0140-6736(21)01825-0
160. Hu K, Wang M, Zhao Y, et al. A Small-Scale Medication of Leflunomide as a Treatment of COVID-19 in an Open-Label Blank-Controlled Clinical Trial. *Virologica Sinica* 2020;35(6):725-33. doi: 10.1007/s12250-020-00258-7 [published Online First: 20200721]
161. Huang M, Tang T, Pang P, et al. Treating COVID-19 with Chloroquine. *J Mol Cell Biol* 2020;12(4):322-25. doi: 10.1093/jmcb/mjaa014 [published Online First: 2020/04/03]
162. Huang YQ, Tang SQ, Xu XL, et al. No Statistically Apparent Difference in Antiviral Effectiveness Observed Among Ribavirin Plus Interferon-Alpha, Lopinavir/Ritonavir Plus Interferon-Alpha, and Ribavirin Plus Lopinavir/Ritonavir Plus Interferon-Alpha in Patients With Mild to Moderate Coronavirus Disease 2019: Results of a Randomized, Open-Labeled Prospective Study. *Front Pharmacol* 2020;11(1071):1071. doi: 10.3389/fphar.2020.01071 [published Online First: 20200714]
163. Hung IF, Lung KC, Tso EY, et al. Triple combination of interferon beta-1b, lopinavir-ritonavir, and ribavirin in the treatment of patients admitted to hospital with COVID-19: an open-label, randomised, phase 2 trial. *Lancet* 2020;395(10238):1695-704. doi: 10.1016/S0140-6736(20)31042-4 [published Online First: 20200510]
164. Husain P, Ahmed S, Husain B. Role of doxycycline, oral steroids, and nasal steroid in treatment of anosmia due to COVID-19 with the new insights into the doxycycline activity., 16 November 2020, PREPRINT (Version 1). 2020 doi: Available at Research Square [<https://doi.org/10.21203/rs.3.rs-107710/v1>]
165. Ivashchenko AA, Dmitriev KA, Vostokova NV, et al. AVIFAVIR for Treatment of Patients With Moderate Coronavirus Disease 2019 (COVID-19): Interim Results of a Phase II/III Multicenter Randomized Clinical Trial. *Clin Infect Dis* 2021;73(3):531-34. doi: 10.1093/cid/ciaa1176
166. Ivashkin V, Fomin V, Moiseev S, et al. Efficacy of a Probiotic Consisting of Lacticaseibacillus rhamnosus PDV 1705, Bifidobacterium bifidum PDV 0903, Bifidobacterium longum subsp. infantis PDV 1911, and Bifidobacterium longum subsp. longum PDV 2301 in the Treatment of Hospitalized Patients with COVID-19: a Randomized Controlled Trial. *Probiotics Antimicrob Proteins* 2021:1-9. doi: 10.1007/s12602-021-09858-5 [published Online First: 20211013]
167. Jagannathan P, Andrews JR, Bonilla H, et al. Peginterferon Lambda-1a for treatment of outpatients with uncomplicated COVID-19: a randomized placebo-controlled trial. *Nat Commun* 2021;12(1):1967. doi: 10.1038/s41467-021-22177-1 [published Online First: 20210330]
168. Jamaati H, Hashemian SM, Farzanegan B, et al. No clinical benefit of high dose corticosteroid administration in patients with COVID-19: A preliminary report of a randomized clinical trial. *Eur J Pharmacol* 2021;897:173947. doi: 10.1016/j.ejphar.2021.173947 [published Online First: 20210216]
169. Jamali Moghadam Siahkali S, Zarezade B, Koolaji S, et al. Safety and effectiveness of high-dose vitamin C in patients with COVID-19: a randomized open-label clinical trial. *Eur J Med Res* 2021;26(1):20. doi: 10.1186/s40001-021-00490-1 [published Online First: 20210211]
170. Jeronimo CMP, Farias MEL, Val FFA, et al. Methylprednisolone as Adjunctive Therapy for Patients Hospitalized With Coronavirus Disease 2019 (COVID-19; Metcovid): A Randomized, Double-blind, Phase IIb, Placebo-controlled Trial. *Clin Infect Dis* 2021;72(9):e373-e81. doi: 10.1093/cid/ciaa1177
171. Johnston C, Brown ER, Stewart J, et al. Hydroxychloroquine with or without azithromycin for treatment of early SARS-CoV-2 infection among high-risk outpatient adults: A randomized clinical trial. *EClinicalMedicine* 2021;33:100773. doi: 10.1016/j.eclinm.2021.100773 [published Online First: 20210227]
172. Kalantari S, Fard SR, Maleki D, et al. Comparing the effectiveness of Atazanavir/Ritonavir/Dolutegravir/Hydroxychloroquine and Lopinavir/Ritonavir/Hydroxychloroquine treatment regimens in COVID-19 patients. *J Med Virol* 2021;93(12):6557-65. doi: 10.1002/jmv.27195 [published Online First: 20210728]
173. Kalil AC, Patterson TF, Mehta AK, et al. Baricitinib plus Remdesivir for Hospitalized Adults with Covid-19. *N Engl J Med* 2021;384(9):795-807. doi: 10.1056/NEJMoa2031994 [published Online First: 20201211]
174. Kalil AC, Mehta AK, Patterson TF, et al. Efficacy of interferon beta-1a plus remdesivir compared with remdesivir alone in hospitalised adults with COVID-19: a double-blind, randomised, placebo-controlled, phase 3 trial. *The Lancet Respiratory Medicine* 2021;9(12):1365-76. doi: 10.1016/S2213-2600(21)00384-2
175. Abbaspour Kasgari H, Moradi S, Shabani AM, et al. Evaluation of the efficacy of sofosbuvir plus daclatasvir in combination with ribavirin for hospitalized COVID-19 patients with moderate disease compared with standard care: a single-centre, randomized controlled trial. *J Antimicrob Chemother* 2020;75(11):3373-78. doi: 10.1093/jac/dkaa332
176. Kasiri H, Rouhani N, Salehifar E, et al. Mometasone furoate nasal spray in the treatment of patients with COVID-19 olfactory dysfunction: A randomized, double blind clinical trial. *Int Immunopharmacol* 2021;98:107871. doi: 10.1016/j.intimp.2021.107871 [published Online First: 20210612]
177. Khamis F, Al Naabi H, Al Lawati A, et al. Randomized controlled open label trial on the use of favipiravir combined with inhaled interferon beta-1b in hospitalized patients with moderate to severe COVID-19 pneumonia. *Int J Infect Dis* 2021;102:538-43. doi: 10.1016/j.ijid.2020.11.008 [published Online First: 20201109]

178. Ruzhentsova TA, Chukhlyaev PV, Khavkina DA, et al. Efficacy and safety of favipiravir in a complex therapy of mild to moderate COVID-19. *Infectious diseases: News, Opinions, Training* 2020;9(4):26-38. doi: 10.33029/2305-3496-2020-9-4-26-38
179. Khodashahi R, Naderi H, Bojdy A, et al. Comparison the Effect of Arbidol Plus Hydroxychloroquine vs Hydroxychloroquine Alone in Treatment of COVID-19 Disease: A Randomized Clinical Trial. *Current Respiratory Medicine Reviews* 2021;16(4):252-62. doi: 10.2174/1573398x17666210129125703
180. Khoo SH, FitzGerald R, Fletcher T, et al. Optimal dose and safety of molnupiravir in patients with early SARS-CoV-2: a phase 1, dose-escalating, randomised controlled study. *medRxiv* 2021:2021.05.03.21256309. doi: 10.1101/2021.05.03.21256309
181. Kimura KS, Freeman MH, Wessinger BC, et al. Interim analysis of an open-label randomized controlled trial evaluating nasal irrigations in non-hospitalized patients with coronavirus disease 2019. *Int Forum Allergy Rhinol* 2020;10(12):1325-28. doi: 10.1002/alr.22703 [published Online First: 20201020]
182. Kishoria N, Mathur SL, Parmar V, et al. IVERMECTIN AS ADJUVANT TO HYDROXYCHOLOROQUINE IN PATIENTS RESISTANT TO STANDARD TREATMENT FOR SARS-CoV-2: RESULTS OF AN OPEN-LABEL RANDOMIZED CLINICAL STUDY. *Paripex Indian Journal of Research* 2020:1-4. doi: 10.36106/paripex/4801859
183. Klussmann J, Lehmann C, Grosheva M, et al. COVID-19: Azelastine nasal spray Reduces Virus-load In Nasal swabs (CARVIN). Early intervention with azelastine nasal sprays reduces viral load in SARS-CoV-2 infected patients. First report on a double-blind placebo-controlled phase II clinical trial. *Research Square* 2021 doi: 10.21203/rs.3.rs-864566/v1
184. Kosiborod MN, Esterline R, Furtado RHM, et al. Dapagliflozin in patients with cardiometabolic risk factors hospitalised with COVID-19 (DARE-19): a randomised, double-blind, placebo-controlled, phase 3 trial. *Lancet Diabetes Endocrinol* 2021;9(9):586-94. doi: 10.1016/S2213-8587(21)00180-7 [published Online First: 20210721]
185. Kosmopoulos A, Bhatt DL, Meglis G, et al. A randomized trial of icosapent ethyl in ambulatory patients with COVID-19. *iScience* 2021;24(9):103040. doi: 10.1016/j.isci.2021.103040 [published Online First: 20210826]
186. World Health Organization. Unpublished data on Krishnan and Kumar trials on molnupiravir, 2021.
187. Krolewiecki A, Lifschitz A, Moragas M, et al. Antiviral effect of high-dose ivermectin in adults with COVID-19: A proof-of-concept randomized trial. *EClinicalMedicine* 2021;37:100959. doi: 10.1016/j.eclinm.2021.100959 [published Online First: 20210618]
188. Kumar S, De Souza R, Nadkar M, et al. A two-arm, randomized, controlled, multi-centric, open-label phase-2 study to evaluate the efficacy and safety of Itolizumab in moderate to severe ARDS patients due to COVID-19. *Expert Opin Biol Ther* 2021;21(5):675-86. doi: 10.1080/14712598.2021.1905794 [published Online First: 20210409]
189. Kumari P, Dembra S, Dembra P, et al. The Role of Vitamin C as Adjuvant Therapy in COVID-19. *Cureus* 2020;12(11):e11779. doi: 10.7759/cureus.11779 [published Online First: 20201130]
190. Kyriazopoulou E, Poulakou G, Milionis H, et al. Early Anakinra Treatment for COVID-19 Guided by Urokinase Plasminogen Receptor. *medRxiv* 2021:2021.05.16.21257283. doi: 10.1101/2021.05.16.21257283
191. Lakkireddy M, Gadiga SG, Malathi RD, et al. Impact of daily high dose oral vitamin D therapy on the inflammatory markers in patients with COVID 19 disease. *Sci Rep* 2021;11(1):10641. doi: 10.1038/s41598-021-90189-4 [published Online First: 20210520]
192. Lattmann E, Bhalerao P, ShashiBhushan BL, et al. Randomized, Comparative, Clinical Trial to Evaluate Efficacy and Safety of PNB001 in Moderate COVID-19 Patients. *medRxiv* 2021:2021.04.16.21255256. doi: 10.1101/2021.04.16.21255256
193. Lawler PR, Goligher EC, Berger JS, et al. Therapeutic Anticoagulation in Non-Critically Ill Patients with Covid-19. *medRxiv* 2021:2021.05.13.21256846. doi: 10.1101/2021.05.13.21256846
194. Lemos ACB, do Espirito Santo DA, Salvetti MC, et al. Therapeutic versus prophylactic anticoagulation for severe COVID-19: A randomized phase II clinical trial (HESACOVID). *Thromb Res* 2020;196:359-66. doi: 10.1016/j.thromres.2020.09.026 [published Online First: 20200921]
195. Lenze EJ, Mattar C, Zorumski CF, et al. Fluvoxamine vs Placebo and Clinical Deterioration in Outpatients With Symptomatic COVID-19: A Randomized Clinical Trial. *JAMA* 2020;324(22):2292-300. doi: 10.1001/jama.2020.22760
196. Lescure FX, Honda H, Fowler RA, et al. Sarilumab in patients admitted to hospital with severe or critical COVID-19: a randomised, double-blind, placebo-controlled, phase 3 trial. *Lancet Respir Med* 2021;9(5):522-32. doi: 10.1016/S2213-2600(21)00099-0 [published Online First: 20210304]
197. Li Y, Xie Z, Lin W, et al. Efficacy and Safety of Lopinavir/Ritonavir or Arbidol in Adult Patients with Mild/Moderate COVID-19: An Exploratory Randomized Controlled Trial. *Med (N Y)* 2020;1(1):105-13 e4. doi: 10.1016/j.medj.2020.04.001 [published Online First: 20200519]
198. Li C, Luo F, Liu C, et al. Effect of a genetically engineered interferon-alpha versus traditional interferon-alpha in the treatment of moderate-to-severe COVID-19: a randomised clinical trial. *Ann Med* 2021;53(1):391-401. doi: 10.1080/07853890.2021.1890329 [published Online First: 2021/02/24]
199. Li T, Sun L, Zhang W, et al. Bromhexine Hydrochloride Tablets for the Treatment of Moderate COVID-19: An Open-Label Randomized Controlled Pilot Study. *Clin Transl Sci* 2020;13(6):1096-102. doi: 10.1111/cts.12881 [published Online First: 20201010]

200. Li Q, Cui C, Xu F, et al. Evaluation of the efficacy and safety of hydroxychloroquine in comparison with chloroquine in moderate and severe patients with COVID-19. *Sci China Life Sci* 2021;64(4):660-63. doi: 10.1007/s11427-020-1871-4 [published Online First: 20210118]
201. Liesenborghs L, Spriet I, Jochmans D, et al. Itraconazole for COVID-19: preclinical studies and a proof-of-concept randomized clinical trial. *EBioMedicine* 2021;66:103288. doi: 10.1016/j.ebiom.2021.103288 [published Online First: 20210319]
202. Lomakin NV, Bakirov BA, Protsenko DN, et al. The efficacy and safety of levilimab in severely ill COVID-19 patients not requiring mechanical ventilation: results of a multicenter randomized double-blind placebo-controlled phase III CORONA clinical study. *Inflamm Res* 2021;70(10-12):1233-46. doi: 10.1007/s00011-021-01507-5 [published Online First: 20210929]
203. Lopes RD, Macedo AVS, de Barros ESPGM, et al. Effect of Discontinuing vs Continuing Angiotensin-Converting Enzyme Inhibitors and Angiotensin II Receptor Blockers on Days Alive and Out of the Hospital in Patients Admitted With COVID-19: A Randomized Clinical Trial. *JAMA* 2021;325(3):254-64. doi: 10.1001/jama.2020.25864 [published Online First: 2021/01/20]
204. Lopes MI, Bonjorno LP, Giannini MC, et al. Beneficial effects of colchicine for moderate to severe COVID-19: a randomised, double-blinded, placebo-controlled clinical trial. *RMD Open* 2021;7(1):e001455. doi: 10.1136/rmdopen-2020-001455
205. Lopes RD, de Barros ESPGM, Furtado RHM, et al. Therapeutic versus prophylactic anticoagulation for patients admitted to hospital with COVID-19 and elevated D-dimer concentration (ACTION): an open-label, multicentre, randomised, controlled trial. *Lancet* 2021;397(10291):2253-63. doi: 10.1016/S0140-6736(21)01203-4 [published Online First: 20210604]
206. Lopez-Medina E, Lopez P, Hurtado IC, et al. Effect of Ivermectin on Time to Resolution of Symptoms Among Adults With Mild COVID-19: A Randomized Clinical Trial. *JAMA* 2021;325(14):1426-35. doi: 10.1001/jama.2021.3071
207. Lou Y, Liu L, Yao H, et al. Clinical Outcomes and Plasma Concentrations of Baloxavir Marboxil and Favipiravir in COVID-19 Patients: An Exploratory Randomized, Controlled Trial. *Eur J Pharm Sci* 2021;157:105631. doi: 10.1016/j.ejps.2020.105631 [published Online First: 20201025]
208. Lyngbakken MN, Berdal JE, Eskesen A, et al. A pragmatic randomized controlled trial reports lack of efficacy of hydroxychloroquine on coronavirus disease 2019 viral kinetics. *Nat Commun* 2020;11(1):5284. doi: 10.1038/s41467-020-19056-6 [published Online First: 20201020]
209. Jayk Bernal A, Gomes da Silva MM, Musungaie DB, et al. Molnupiravir for Oral Treatment of Covid-19 in Nonhospitalized Patients. *N Engl J Med* 2021 doi: 10.1056/NEJMoa2116044 [published Online First: 2021/12/17]
210. Maghbooli Z, Sahraian MA, Jamalimoghadamsiahkali S, et al. Treatment With 25-Hydroxyvitamin D(3) (Calcifediol) Is Associated With a Reduction in the Blood Neutrophil-to-Lymphocyte Ratio Marker of Disease Severity in Hospitalized Patients With COVID-19: A Pilot Multicenter, Randomized, Placebo-Controlled, Double-Blinded Clinical Trial. *Endocr Pract* 2021;27(12):1242-51. doi: 10.1016/j.eprac.2021.09.016 [published Online First: 20211013]
211. Mahajan L, Singh AP, Gifty. Clinical outcomes of using remdesivir in patients with moderate to severe COVID-19: A prospective randomised study. *Indian J Anaesth* 2021;65(Suppl 1):S41-S46. doi: 10.4103/ija.IJA\_149\_21 [published Online First: 20210320]
212. Mahmud R, Rahman MM, Alam I, et al. Ivermectin in combination with doxycycline for treating COVID-19 symptoms: a randomized trial. *J Int Med Res* 2021;49(5):3000605211013550. doi: 10.1177/03000605211013550 [published Online First: 2021/05/14]
213. Majeed M, Nagabhushanam K, Shah K, et al. A Randomized, Double-Blind, Placebo-Controlled Study to Assess the Efficacy and Safety of a Nutritional Supplement (ImmuActive(TM)) for COVID-19 Patients. *Evid Based Complement Alternat Med* 2021;2021:8447545. doi: 10.1155/2021/8447545 [published Online First: 20211011]
214. Maldonado V, Hernandez-Ramirez C, Oliva-Perez EA, et al. Pentoxifylline decreases serum LDH levels and increases lymphocyte count in COVID-19 patients: Results from an external pilot study. *Int Immunopharmacol* 2021;90:107209. doi: 10.1016/j.intimp.2020.107209 [published Online First: 20201126]
215. Mansour E, Palma AC, Ulaf RG, et al. Pharmacological inhibition of the kinin-kallikrein system in severe COVID-19 A proof-of-concept study (preprint). *medRxiv* 2020:2020.08.11.20167353. doi: 10.1101/2020.08.11.20167353
216. Marconi VC, Ramanan AV, de Bono S, et al. Baricitinib plus Standard of Care for Hospitalized Adults with COVID-19. *medRxiv* 2021:2021.04.30.21255934. doi: 10.1101/2021.04.30.21255934
217. Marcos M, Carmona-Torre F, Vidal Laso R, et al. Therapeutic vs. prophylactic bemiparin in hospitalized patients with non-severe COVID-19 (BEMICOP): an open-label, multicenter, randomized trial. *Thromb Haemost* 2021 doi: 10.1055/a-1667-7534 [published Online First: 20211012]
218. Maskin LP, Bonelli I, Olarte GL, et al. High- Versus Low-Dose Dexamethasone for the Treatment of COVID-19-related Acute Respiratory Distress Syndrome: A Multicenter and Randomized Open-label Clinical Trial. *medRxiv* 2021:2021.09.15.21263597. doi: 10.1101/2021.09.15.21263597
219. McCreary MR, Schnell PM, Rhoda DA. Randomized Double-blind Placebo-controlled Proof-of-concept Trial of Resveratrol for Outpatient Treatment of Mild Coronavirus Disease (COVID-19). *Res Sq* 2021 doi: 10.21203/rs.3.rs-861831/v1 [published Online First: 20210913]

220. Mehboob R, Ahmad FJ, Qayyum A, et al. Aprepitant as a combinant with Dexamethasone reduces the inflammation via Neurokinin 1 Receptor Antagonism in severe to critical Covid-19 patients and potentiates respiratory recovery: A novel therapeutic approach (preprint). *medRxiv* 2020:2020.08.01.20166678. doi: 10.1101/2020.08.01.20166678
221. Migled B MB, José B, et al. . EXPERIMENTAL STUDY: MANAGEMENT OF METISOPRINOL IN PATIENTS WITH COVID-19. . DOI: 1047460/uctv24i103356 2020
222. Miller J, Bruen C, Schnaus M, et al. Auxora versus standard of care for the treatment of severe or critical COVID-19 pneumonia: results from a randomized controlled trial. *Crit Care* 2020;24(1):502. doi: 10.1186/s13054-020-03220-x [published Online First: 20200814]
223. Miller RA, Guru P, Bauer P, et al. Clinical Results with a B Cell Activating Anti-CD73 Antibody for the Immunotherapy of COVID-19. *medRxiv* 2021:2021.09.13.21263406. doi: 10.1101/2021.09.13.21263406
224. Mobarak S, Salasi M, Hormati A, et al. Evaluation of the Effect of Sofosbuvir and Daclatasvir in Hospitalised COVID-19 Patients: A Randomized Double-Blind Clinical Trial (DISCOVER). *Social Science Research Network* 2021
225. Mohan A, Tiwari P, Suri T, et al. Ivermectin in mild and moderate COVID-19 (RIVET-COV): a randomized, placebo-controlled trial, 02 February 2021, PREPRINT (Version 1). Available at Research Square [<https://doi.org/10.21203/rs.3rs-191648/v1>] 2021
226. Moni M, Madathil T, Sathyapalan DT, et al. A Feasibility Trial to Evaluate the Composite Efficacy of Inhaled Nitric Oxide in the Treatment of Covid 19 Pneumonia : Impact on Viral Load and Clinical Outcomes. *medRxiv* 2021:2021.04.15.21255300. doi: 10.1101/2021.04.15.21255300
227. Monk PD, Marsden RJ, Tear VJ, et al. Safety and efficacy of inhaled nebulised interferon beta-1a (SNG001) for treatment of SARS-CoV-2 infection: a randomised, double-blind, placebo-controlled, phase 2 trial. *Lancet Respir Med* 2021;9(2):196-206. doi: 10.1016/S2213-2600(20)30511-7 [published Online First: 20201112]
228. Moreira TG, Matos KTF, De Paula GS, et al. Nasal Administration of Anti-CD3 Monoclonal Antibody (Foralumab) Reduces Lung Inflammation and Blood Inflammatory Biomarkers in Mild to Moderate COVID-19 Patients: A Pilot Study. *Front Immunol* 2021;12:709861. doi: 10.3389/fimmu.2021.709861 [published Online First: 20210812]
229. Munch MW, Meyhoff TS, Helleberg M, et al. Low-dose hydrocortisone in patients with COVID-19 and severe hypoxia: The COVID STEROID randomised, placebo-controlled trial. *Acta Anaesthesiol Scand* 2021;65(10):1421-30. doi: 10.1111/aas.13941 [published Online First: 20210920]
230. Munch MW, Myatra SN, Tirupakuzhi Vijayaraghavan BK, et al. Dexamethasone 12 mg versus 6 mg for patients with COVID-19 and severe hypoxia: an international, randomized, blinded trial. *medRxiv* 2021:2021.07.22.21260755. doi: 10.1101/2021.07.22.21260755
231. Murai IH, Fernandes AL, Sales LP, et al. Effect of a Single High Dose of Vitamin D3 on Hospital Length of Stay in Patients With Moderate to Severe COVID-19: A Randomized Clinical Trial. *JAMA* 2021;325(11):1053-60. doi: 10.1001/jama.2020.26848
232. Méndez-Flores S, Priego-Ranero Á, Azamar-Llamas D, et al. Effect of polymerized type I collagen in hyperinflammation of adult outpatients with symptomatic COVID-19: a double blind, randomised, placebo-controlled clinical trial. *medRxiv* 2021:2021.05.12.21257133. doi: 10.1101/2021.05.12.21257133
233. Najmeddin F, Solhjoo M, Ashraf H, et al. Effects of Renin-Angiotensin-Aldosterone Inhibitors on Early Outcomes of Hypertensive COVID-19 Patients: A Randomized Triple-Blind Clinical Trial. *Am J Hypertens* 2021 doi: 10.1093/ajh/hpab111 [published Online First: 20210715]
234. MS N, N G, P N, et al. Ivermectin as an adjunct treatment for hospitalized adult COVID-19 patients: A randomized multi-center clinical trial, 24 November 2020, PREPRINT (Version 1). 2020 doi: Available at Research Square [<https://doi.org/10.21203/rs.3rs-109670/v1>]
235. Niktale H SS, Nosrati A, Ghasemi M, Houshmand M, Mansori I, Niktale R. The therapeutic effect of an organosulfur-derived capsule (Nicovid) as a supplementary treatment for covid-19 patients. *Medical Science*, 2021(113):1661-68.
236. Nojomi M, Yassin Z, Keyvani H, et al. Effect of Arbidol (Umifenovir) on COVID-19: a randomized controlled trial. *BMC Infect Dis* 2020;20(1):954. doi: 10.1186/s12879-020-05698-w [published Online First: 20201214]
237. Nouri-Vaskeh M, Kalami N, Zand R, et al. Comparison of losartan and amlodipine effects on the outcomes of patient with COVID-19 and primary hypertension: A randomised clinical trial. *Int J Clin Pract* 2021;75(6):e14124. doi: 10.1111/ijcp.14124 [published Online First: 20210313]
238. Khalili H, Nourian A, Ahmadinejad Z, et al. Efficacy and safety of sofosbuvir/ ledipasvir in treatment of patients with COVID-19; A randomized clinical trial. *Acta Biomed* 2020;91(4):e2020102. doi: 10.23750/abm.v91i4.10877 [published Online First: 20201110]
239. Ogbuagu O, KTT, HFG, et al. Acute Kidney Injury In Patients With Moderate COVID-19 treated With Rdv Versus SoC. *Conference on Retroviruses and Opportunistic Infections* 2021
240. Oldenburg CE, Pinsky BA, Brogdon J, et al. Effect of Oral Azithromycin vs Placebo on COVID-19 Symptoms in Outpatients With SARS-CoV-2 Infection: A Randomized Clinical Trial. *JAMA* 2021;326(6):490-98. doi: 10.1001/jama.2021.11517

241. Oliynyk O, Barg W, Slifirczyk A, et al. Comparison of the Effect of Unfractionated Heparin and Enoxaparin Sodium at Different Doses on the Course of COVID-19-Associated Coagulopathy. *Life (Basel)* 2021;11(10) doi: 10.3390/life11101032 [published Online First: 20210930]
242. Omrani AS, Pathan SA, Thomas SA, et al. Randomized double-blinded placebo-controlled trial of hydroxychloroquine with or without azithromycin for virologic cure of non-severe Covid-19. *EClinicalMedicine* 2020;29-30:100645-45.
243. Onal H, Arslan B, Ergun NU, et al. Treatment of COVID-19 Patients with Quercetin: A Prospective, Single - Centre, Randomized, Controlled Trial. . *Authorea January 19, 2021* 2021 doi: 10.22541/au.161106492.28349832/v1
244. Butler CC, Dorward J, Yu L-M, et al. Azithromycin for community treatment of suspected COVID-19 in people at increased risk of an adverse clinical course in the UK (PRINCIPLE): a randomised, controlled, open-label, adaptive platform trial. *The Lancet* 2021;397(10279):1063-74. doi: 10.1016/s0140-6736(21)00461-x
245. Padmanabhan U, Mukherjee S, Borse R, et al. Phase II Clinical trial for Evaluation of BCG as potential therapy for COVID-19, 2020.
246. Consortium WHOST, Pan H, Peto R, et al. Repurposed Antiviral Drugs for Covid-19 - Interim WHO Solidarity Trial Results. *N Engl J Med* 2021;384(6):497-511. doi: 10.1056/NEJMoa2023184 [published Online First: 20201202]
247. Pantos C, Apostolaki V, Kokkinos L, et al. Acute triiodothyronine treatment and red blood cell sedimentation rate (ESR) in critically ill COVID-19 patients: A novel association? *Clinical Hemorheology and Microcirculation* 2021;79:485-88. doi: 10.3233/CH-211215
248. Parienti JJ, Prazuck T, Peyro-Saint-Paul L, et al. Effect of Tenofovir Disoproxil Fumarate and Emtricitabine on nasopharyngeal SARS-CoV-2 viral load burden amongst outpatients with COVID-19: A pilot, randomized, open-label phase 2 trial. *EClinicalMedicine* 2021;38:100993. doi: 10.1016/j.eclim.2021.100993 [published Online First: 20210627]
249. Pascual-Figal DA, Roura-Piloto AE, Moral-Escudero E, et al. Colchicine in Recently Hospitalized Patients with COVID-19: A Randomized Controlled Trial (COL-COVID). *Int J Gen Med* 2021;14:5517-26. doi: 10.2147/ijgm.S329810 [published Online First: 20210911]
250. Patel O, Chinni V, El-Khoury J, et al. A pilot double-blind safety and feasibility randomized controlled trial of high-dose intravenous zinc in hospitalized COVID-19 patients. *J Med Virol* 2021;93(5):3261-67. doi: 10.1002/jmv.26895 [published Online First: 20210309]
251. Patel J, Beishuizen A, Ruiz XB, et al. A Randomized Trial of Otilimab in Severe COVID-19 Pneumonia (OSCAR). *medRxiv* 2021:2021.04.14.21255475. doi: 10.1101/2021.04.14.21255475
252. Pawar KS, Mastud RN, Pawar SK, et al. Oral Curcumin With Piperine as Adjuvant Therapy for the Treatment of COVID-19: A Randomized Clinical Trial. *Front Pharmacol* 2021;12:669362. doi: 10.3389/fphar.2021.669362 [published Online First: 20210528]
253. Perepu US, Chambers I, Wahab A, et al. Standard prophylactic versus intermediate dose enoxaparin in adults with severe COVID-19: A multi-center, open-label, randomized controlled trial. *J Thromb Haemost* 2021;19(9):2225-34. doi: 10.1111/jth.15450 [published Online First: 20210718]
254. Perlin DS, Neil GA, Anderson C, et al. CERC-002, a human anti-LIGHT mAb reduces respiratory failure and death in hospitalized COVID-19 ARDS patients. *medRxiv* 2021:2021.04.03.21254748. doi: 10.1101/2021.04.03.21254748
255. Pott-Junior H, Paoliello MMB, Miguel AQC, et al. Use of ivermectin in the treatment of Covid-19: A pilot trial. *Toxicol Rep* 2021;8:505-10. doi: 10.1016/j.toxrep.2021.03.003 [published Online First: 20210309]
256. Prabowo NA, Apriningsih H. Colchicine reduces the degree of inflammation in COVID-19 patients. *IOP Conference Series: Earth and Environmental Science* 2021;824(1):012087. doi: 10.1088/1755-1315/824/1/012087
257. Purwati, Budiono, Rachman BE, et al. A Randomized, Double-Blind, Multicenter Clinical Study Comparing the Efficacy and Safety of a Drug Combination of Lopinavir/Ritonavir-Azithromycin, Lopinavir/Ritonavir-Doxycycline, and Azithromycin-Hydroxychloroquine for Patients Diagnosed with Mild to Moderate COVID-19 Infections. *Biochem Res Int* 2021;2021:6685921. doi: 10.1155/2021/6685921 [published Online First: 20210209]
258. Puskarich MA, Cummins NW, Ingraham NE, et al. A multi-center phase II randomized clinical trial of losartan on symptomatic outpatients with COVID-19. *EClinicalMedicine* 2021;37:100957. doi: 10.1016/j.eclim.2021.100957 [published Online First: 20210617]
259. Puskarich MA, Ingraham NE, Merck LH, et al. Effect of losartan on hospitalized patients with COVID-19-induced lung injury: A randomized clinical trial. *medRxiv* 2021:2021.08.25.21262623. doi: 10.1101/2021.08.25.21262623
260. Novartis Pharmaceuticals. Study to Assess the Efficacy and Safety of Ruxolitinib in Patients With COVID-19 Associated Cytokine Storm (RUXCOVID): US National Library of Medicine - ClinicalTrials.gov; 2021 [Available from: <https://clinicaltrials.gov/ct2/show/results/NCT043621372021>].

261. Raghavan K, Dedeepiya VD, Suryaprakash V, et al. Beneficial Effects of novel Aureobasidium Pullulans strains produced Beta-1,3-1,6 Glucans on Interleukin-6 and D-Dimer levels in COVID-19 patients; results of a randomized multiple-arm pilot clinical study. *medRxiv* 2021:2021.08.09.21261738. doi: 10.1101/2021.08.09.21261738
262. Rahmani H, Davoudi-Monfared E, Nourian A, et al. Interferon beta-1b in treatment of severe COVID-19: A randomized clinical trial. *Int Immunopharmacol* 2020;88:106903. doi: 10.1016/j.intimp.2020.106903 [published Online First: 20200824]
263. Ramachandran R, Bhosale V, Reddy H, et al. Phase III, Randomized, Double-blind, Placebo controlled trial of Efficacy, Safety and Tolerability of Antiviral drug Umifenovir vs Standard care of therapy in non-severe COVID-19 patients. *Int J Infect Dis* 2021 doi: 10.1016/j.ijid.2021.11.025 [published Online First: 20211118]
264. Ramakrishnan S, Nicolau DV, Langford B, et al. Inhaled budesonide in the treatment of early COVID-19 illness: a randomised controlled trial. *medRxiv* 2021:2021.02.04.21251134. doi: 10.1101/2021.02.04.21251134
265. Ranjbar K, Shahriarirad R, Erfani A, et al. Methylprednisolone or Dexamethasone, Which One Is the Superior Corticosteroid in the Treatment of Hospitalized COVID-19 Patients: A Triple-Blinded Randomized Controlled Trial, 01 February 2021, PREPRINT (Version 1). Available at Research Square [<https://doi.org/10.21203/rs.3.rs-148529/v1>] 2021
266. Rashad A, Nafady A, Hassan MH, et al. Therapeutic efficacy of macrolides in management of patients with mild COVID-19, 01 February 2021, PREPRINT (Version 1). Available at Research Square [<https://doi.org/10.21203/rs.3.rs-181996/v1>] 2021
267. Rashad A, Mousa S, Nafady-Hego H, et al. Short term survival of critically ill COVID-19 Egyptian patients on assisted ventilation treated by either Dexamethasone or Tocilizumab. *Sci Rep* 2021;11(1):8816. doi: 10.1038/s41598-021-88086-x [published Online First: 20210423]
268. Rashad A, Nafady A, Hassan MH, et al. Therapeutic efficacy of macrolides in management of patients with mild COVID-19. *Sci Rep* 2021;11(1):16361. doi: 10.1038/s41598-021-95900-z [published Online First: 20210811]
269. Rashid RA, Zgair A, Al-Ani RM. Effect of nasal corticosteroid in the treatment of anosmia due to COVID-19: A randomised double-blind placebo-controlled study. *Am J Otolaryngol* 2021;42(5):103033. doi: 10.1016/j.amjoto.2021.103033 [published Online First: 20210407]
270. Rastogi A, Bhansali A, Khare N, et al. Short term, high-dose vitamin D supplementation for COVID-19 disease: a randomised, placebo-controlled, study (SHADE study). *Postgrad Med J* 2020 doi: 10.1136/postgradmedj-2020-139065 [published Online First: 20201112]
271. Ravichandran R, Mohan SK, Sukumaran SK, et al. Indomethacin Use for Mild & Moderate hospitalised Covid-19 patients: An open label randomized clinical trial. *medRxiv* 2021:2021.07.24.21261007. doi: 10.1101/2021.07.24.21261007
272. Ravikirti, Roy R, Pattadar C, et al. Ivermectin as a potential treatment for mild to moderate COVID-19 – A double blind randomized placebo-controlled trial. *medRxiv* 2021:2021.01.05.21249310. doi: 10.1101/2021.01.05.21249310
273. World Health Organization. Unpublished data on STOP-COVID-2 trial (NCT04668950). 2021
274. Reis G, Moreira Silva EAdS, Medeiros Silva DC, et al. Effect of Early Treatment With Hydroxychloroquine or Lopinavir and Ritonavir on Risk of Hospitalization Among Patients With COVID-19. *JAMA Network Open* 2021;4(4)
275. Reis G, dos Santos Moreira-Silva EA, Silva DCM, et al. Effect of early treatment with fluvoxamine on risk of emergency care and hospitalisation among patients with COVID-19: the TOGETHER randomised, platform clinical trial. *The Lancet Global Health* doi: 10.1016/S2214-109X(21)00448-4
276. Ren Z, Luo H, Yu Z, et al. A Randomized, Open-label, Controlled Clinical Trial of Azvudine Tablets in the Treatment of Mild and Common COVID-19, A Pilot Study. *Adv Sci (Weinh)* 2020:2001435. doi: 10.1002/adv.202001435 [published Online First: 20200714]
277. Resende GG, da Cruz Lage R, Lobê SQ, et al. Blockade of Interleukin Seventeen (IL-17A) with Secukinumab in Hospitalized COVID-19 patients – the BISHOP study. *medRxiv* 2021:2021.07.21.21260963. doi: 10.1101/2021.07.21.21260963
278. Rocco PRM, Silva PL, Cruz FF, et al. Early use of nitazoxanide in mild COVID-19 disease: randomised, placebo-controlled trial. *Eur Respir J* 2021;58(1):2003725. doi: 10.1183/13993003.03725-2020 [published Online First: 20210708]
279. Rodrigues C, Freitas-Santos RS, Levi JE, et al. Hydroxychloroquine plus azithromycin early treatment of mild COVID-19 in an outpatient setting: a randomized, double-blinded, placebo-controlled clinical trial evaluating viral clearance. *Int J Antimicrob Agents* 2021;58(5):106428. doi: 10.1016/j.ijantimicag.2021.106428 [published Online First: 20210825]
280. Patricia Rodríguez-Fortúnez, Antonio J. Martínez-Mellado RJ-R, Miguel Blanquer-Blanquer PC-R, et al. Defibrotide in the prevention and treatment of acute respiratory distress syndrome in patients with COVID-19. Preliminary safety results. *European Journal of Clinical Pharmacology* 2021;77(1):20. doi: 10.1007/s00228-021-03164-3

281. Roostaei Firozabad A, Meybodi ZA, Mousavinasab SR, et al. Efficacy and safety of Levamisole treatment in clinical presentations of non-hospitalized patients with COVID-19: a double-blind, randomized, controlled trial. *BMC Infect Dis* 2021;21(1):297. doi: 10.1186/s12879-021-05983-2 [published Online First: 20210324]
282. Roozbeh F, Saeedi M, Alizadeh-Navaei R, et al. Sofosbuvir and daclatasvir for the treatment of COVID-19 outpatients: a double-blind, randomized controlled trial. *J Antimicrob Chemother* 2021;76(3):753-57. doi: 10.1093/jac/dkaa501 [published Online First: 2020/12/19]
283. Rosas IO, Brau N, Waters M, et al. Tocilizumab in Hospitalized Patients with Severe Covid-19 Pneumonia. *N Engl J Med* 2021;384(16):1503-16. doi: 10.1056/NEJMoa2028700 [published Online First: 20210225]
284. Rossignol J-F, Matthew CB, Oaks JB, et al. Early treatment with nitazoxanide prevents worsening of mild and moderate COVID-19 and subsequent hospitalization. *medRxiv* 2021:2021.04.19.21255441. doi: 10.1101/2021.04.19.21255441
285. Rutgers AaW, Peter E. and van der Holt, Bronno and Postma, Simone and van Vonderen, Marit G.A. and Piersma, Djura P. and Postma, Douwe and van den Berge, Maarten and Jong, Eefje and de Vries, Marten and van der Burg, Leonie and Huugen, Dennis and van der Poel, Marjolein and Kampschreur, Linda M. and Nijland, Marcel and Strijbos, Jaap H. and Tamminga, Menno and Mutsaers, Pim G. N. J. and Schol-Gelok, Suzanne and Dijkstra-Tiekstra, Margriet and Sidorenkov, Grigory and Vincenten, Julien and van Geffen, Wouter H. and Knoester, Marjolein and Kosterink, Jos and Gans, Reinold and Stegeman, Coen and Huls, Gerwin and van Meerten, Tom, . Timely Administration of Tocilizumab Improves Survival of Hospitalized COVID-19 Patients. . Available at SSRN: <https://ssrncom/abstract=3834311> or <http://dxdoiorg/102139/ssrn3834311> 2021
286. Ruzhentsova T CP, Khavkina D, et al. . Phase 3 Trial of Coronavir (Favipiravir) in Patients with Mild to Moderate COVID-19. . SSRN2020; doi:102139/ssrn3696907 2020
287. Rea-Neto A, Bernardelli RS, Camara BMD, et al. An open-label randomized controlled trial evaluating the efficacy of chloroquine/hydroxychloroquine in severe COVID-19 patients. *Sci Rep* 2021;11(1):9023. doi: 10.1038/s41598-021-88509-9 [published Online First: 20210427]
288. Merchante N, Cárcel S, Garrido-Gracia JC, et al. Early Use of Sarilumab in Patients Hospitalised with COVID-19 Pneumonia and Features of Systemic Inflammation. *Antimicrob Agents Chemother* 2021:Aac0210721. doi: 10.1128/aac.02107-21 [published Online First: 2021/12/14]
289. Sancho-López A, Caballero-Bermejo AF, Ruiz-Antorán B, et al. Efficacy and Safety of Sarilumab in patients with COVID19 Pneumonia: A Randomized, Phase III Clinical Trial (SARTRE Study). *Infect Dis Ther* 2021;10(4):2735-48. doi: 10.1007/s40121-021-00543-2 [published Online First: 20211017]
290. Sabico S, Enani MA, Sheshah E, et al. Effects of a 2-Week 5000 IU versus 1000 IU Vitamin D3 Supplementation on Recovery of Symptoms in Patients with Mild to Moderate Covid-19: A Randomized Clinical Trial. *Nutrients* 2021;13(7) doi: 10.3390/nu13072170 [published Online First: 20210624]
291. Sadeghi A, Ali Asgari A, Norouzi A, et al. Sofosbuvir and daclatasvir compared with standard of care in the treatment of patients admitted to hospital with moderate or severe coronavirus infection (COVID-19): a randomized controlled trial. *J Antimicrob Chemother* 2020;75(11):3379-85. doi: 10.1093/jac/dkaa334
292. Salama C, Han J, Yau L, et al. Tocilizumab in Patients Hospitalized with Covid-19 Pneumonia. *N Engl J Med* 2021;384(1):20-30. doi: 10.1056/NEJMoa2030340 [published Online First: 20201217]
293. Salehzadeh F PF, Ataei S et al. . The Impact of Colchicine on The COVID-19 Patients; A Clinical Trial Study. 21 September 2020, PREPRINT (Version 1) available at Research Square [<https://doiorg/1021203/rs3rs-69374/v1>] 2020
294. Salvarani C, Dolci G, Massari M, et al. Effect of Tocilizumab vs Standard Care on Clinical Worsening in Patients Hospitalized With COVID-19 Pneumonia: A Randomized Clinical Trial. *JAMA Intern Med* 2021;181(1):24-31. doi: 10.1001/jamainternmed.2020.6615
295. Samimagham HR, Hassani Azad M, Haddad M, et al. The Efficacy of Famotidine in improvement of outcomes in Hospitalized COVID-19 Patients: A structured summary of a study protocol for a randomised controlled trial. *Trials* 2020;21(1):848. doi: 10.1186/s13063-020-04773-6 [published Online First: 20201013]
296. Santamarina M, Beddings I, Lomakin FM, et al. Sildenafil for the Treatment of Patients With COVID-19 and Perfusion Mismatch on Subtraction Computed Tomography Angiography: A Pilot, Placebo-Controlled Randomised Trial: SSRN, 2021.
297. Sayad B, Khodarahmi R, Najafi F, et al. Efficacy and safety of sofosbuvir/velpatasvir versus the standard of care in adults hospitalized with COVID-19: a single-centre, randomized controlled trial. *J Antimicrob Chemother* 2021;76(8):2158-67. doi: 10.1093/jac/dkab152 [published Online First: 2021/05/27]
298. Schwartz E. Ivermectin vs. Placebo treatment in non-hospitalized patients with COVID-19 – A double blind , randomized controlled trial. *Private correspondence with study author* 2021
299. Schwartz I, Boesen ME, Cerchiaro G, et al. Assessing the efficacy and safety of hydroxychloroquine as outpatient treatment of COVID-19: a randomized controlled trial. *CMAJ Open* 2021;9(2):E693-E702. doi: 10.9778/cmajo.20210069 [published Online First: 20210618]

300. Sedighiyan M, Abdollahi H, Karimi E, et al. Omega-3 polyunsaturated fatty acids supplementation improve clinical symptoms in patients with covid-19: A randomized clinical trial. . *Authorea January 13, 2021*  
2021 doi: 10.22541/au.161051252.26168891/v1
301. Sekhavati E, Jafari F, SeyedAlinaghi S, et al. Safety and effectiveness of azithromycin in patients with COVID-19: An open-label randomised trial. *Int J Antimicrob Agents* 2020;56(4):106143. doi: 10.1016/j.ijantimicag.2020.106143 [published Online First: 20200825]
302. Self WH, Semler MW, Leither LM, et al. Effect of Hydroxychloroquine on Clinical Status at 14 Days in Hospitalized Patients With COVID-19: A Randomized Clinical Trial. *JAMA* 2020;324(21):2165-76.
303. Sethi S. Intermediate or Prophylactic-Dose Anticoagulation for Venous or Arterial Thromboembolism in Severe COVID-19 (IMPROVE): US National Library of Medicine - ClinicalTrials.gov, 2021.
304. Shinkai M, Tsushima K, Tanaka S, et al. Efficacy and Safety of Favipiravir in Moderate COVID-19 Pneumonia Patients without Oxygen Therapy: A Randomized, Phase III Clinical Trial. *Infect Dis Ther* 2021;10(4):2489-509. doi: 10.1007/s40121-021-00517-4 [published Online First: 20210827]
305. Sholzberg M, Tang GH, Rahhal H, et al. Heparin for Moderately Ill Patients with Covid-19. *medRxiv* 2021 doi: 10.1101/2021.07.08.21259351 [published Online First: 20210712]
306. Shrivastava R, Vijay M, Maneby N, et al. Clinical Efficacy of an Osmotic, Antiviral and Anti-Inflammatory Polymeric Nasal Film to Treat Covid-19 Early-Phase Respiratory Symptoms. *Open Access Journal of Clinical Trials* 2021;Volume 13:11-20. doi: 10.2147/oajct.S307144
307. Siami Z, Aghajanian S, Mansouri S, et al. Effect of Ammonium Chloride in addition to standard of care in outpatients and hospitalized COVID-19 patients: A randomized clinical trial. *Int J Infect Dis* 2021;108:306-08. doi: 10.1016/j.ijid.2021.04.043 [published Online First: 20210418]
308. Sigamani A, Shetty S, Madhavi, et al. Galectin antagonist use in mild cases of SARS-CoV-2: pilot feasibility randomised, open label, controlled trial. *J Vaccines Vaccin* 2020;S10 doi: 10.1101/2020.12.03.20238840
309. Silva Borba MG, Almeida Val FF, Sampaio VS, et al. Chloroquine diphosphate in two different dosages as adjunctive therapy of hospitalized patients with severe respiratory syndrome in the context of coronavirus (SARS-CoV-2) infection: Preliminary safety results of a randomized, double-blinded, phase IIb clinical trial (<em>CloroCovid-19 Study</em>). *medRxiv* 2020:2020.04.07.20056424. doi: 10.1101/2020.04.07.20056424
310. Silva M, Espejo A, L Pereyra M, et al. Efficacy of Nitazoxanide in reducing the viral load in COVID-19 patients. Randomized, placebo-controlled, single-blinded, parallel group, pilot study. *medRxiv* 2021:2021.03.03.21252509. doi: 10.1101/2021.03.03.21252509
311. Singh D, Bogus M, Moskalenko V, et al. A phase 2 multiple ascending dose study of the inhaled pan-JAK inhibitor nezulcitinib (TD-0903) in severe COVID-19. *Eur Respir J* 2021;58(4) doi: 10.1183/13993003.00673-2021 [published Online First: 20211014]
312. Singh BO, Moirangthem B, Panda PK, et al. Safety and efficacy of antiviral therapy alone or in combination in COVID-19 - a randomized controlled trial (SEV COVID Trial). *medRxiv* 2021:2021.06.06.21258091. doi: 10.1101/2021.06.06.21258091
313. Sivapalan P, Suppli Ulrik C, Sophie Lapperre T, et al. Azithromycin and hydroxychloroquine in hospitalised patients with confirmed COVID-19-a randomised double-blinded placebo-controlled trial. *Eur Respir J* 2021 doi: 10.1183/13993003.00752-2021 [published Online First: 20210603]
314. Sivapalasingam S, Lederer DJ, Bhore R, et al. A Randomized Placebo-Controlled Trial of Sarilumab in Hospitalized Patients with Covid-19. *medRxiv* 2021:2021.05.13.21256973. doi: 10.1101/2021.05.13.21256973
315. Skendelas JP, Phan D, Caputo V, et al. Novel CCR5 Antagonist for the Treatment of Mild-Moderate COVID-19 Infection after Lung Transplant. *The Journal of Heart and Lung Transplantation* 2021;40(4) doi: 10.1016/j.healun.2021.01.891
316. Skipper CP, Pastick KA, Engen NW, et al. Hydroxychloroquine in Nonhospitalized Adults With Early COVID-19 : A Randomized Trial. *Ann Intern Med* 2020;173(8):623-31. doi: 10.7326/M20-4207 [published Online First: 20200716]
317. Sobngwi E, Zemsu S, Guewo-Fokeng M, et al. Doxycycline is a safe alternative to Hydroxychloroquine + Azithromycin to prevent clinical worsening and hospitalization in mild COVID-19 patients: An open label randomized clinical trial (DOXYCOV). *medRxiv* 2021:2021.07.25.21260838. doi: 10.1101/2021.07.25.21260838
318. Soin AS, Kumar K, Choudhary NS, et al. Tocilizumab plus standard care versus standard care in patients in India with moderate to severe COVID-19-associated cytokine release syndrome (COVINTOC): an open-label, multicentre, randomised, controlled, phase 3 trial. *Lancet Respir Med* 2021;9(5):511-21. doi: 10.1016/S2213-2600(21)00081-3 [published Online First: 20210304]
319. Solanich X, Antoli A, Rocamora-Blanch G, et al. Methylprednisolone Pulses Plus Tacrolimus in Addition to Standard of Care vs. Standard of Care Alone in Patients With Severe COVID-19. A Randomized Controlled Trial. *Front Med (Lausanne)* 2021;8:691712. doi: 10.3389/fmed.2021.691712 [published Online First: 20210614]

320. Solaymani-Dodaran M, Ghanei M, Bagheri M, et al. Safety and efficacy of Favipiravir in moderate to severe SARS-CoV-2 pneumonia. *Int Immunopharmacol* 2021;95:107522. doi: 10.1016/j.intimp.2021.107522 [published Online First: 20210311]
321. Song J-Y, Yoon J-G, Seo Y-B, et al. Ciclesonide Inhaler Treatment for Mild-to-Moderate COVID-19: A Randomized, Open-Label, Phase 2 Trial. *J Clin Med* 2021;10(16):3545. doi: 10.3390/jcm10163545
322. Song N-J, Allen C, Vilgelm AE, et al. IMMUNOLOGICAL INSIGHTS INTO THE THERAPEUTIC ROLES OF CD24Fc AGAINST SEVERE COVID-19. *medRxiv : the preprint server for health sciences* 2021:2021.08.18.21262258. doi: 10.1101/2021.08.18.21262258
323. Spinner CD, Gottlieb RL, Criner GJ, et al. Effect of Remdesivir vs Standard Care on Clinical Status at 11 Days in Patients With Moderate COVID-19: A Randomized Clinical Trial. *JAMA* 2020;324(11):1048-57. doi: 10.1001/jama.2020.16349
324. Spyropoulos AC, Goldin M, Giannis D, et al. Efficacy and Safety of Therapeutic-Dose Heparin vs Standard Prophylactic or Intermediate-Dose Heparins for Thromboprophylaxis in High-risk Hospitalized Patients With COVID-19: The HEP-COVID Randomized Clinical Trial. *JAMA Intern Med* 2021;181(12):1612-20. doi: 10.1001/jamainternmed.2021.6203
325. W. H. O. Rapid Evidence Appraisal for COVID-19 Therapies Working Group, Sterne JAC, Murthy S, et al. Association Between Administration of Systemic Corticosteroids and Mortality Among Critically Ill Patients With COVID-19: A Meta-analysis. *JAMA* 2020;324(13):1330-41. doi: 10.1001/jama.2020.17023
326. Stone JH, Frigault MJ, Serling-Boyd NJ, et al. Efficacy of Tocilizumab in Patients Hospitalized with Covid-19. *N Engl J Med* 2020;383(24):2333-44. doi: 10.1056/NEJMoa2028836 [published Online First: 20201021]
327. Strich JR, Tian X, Samour M, et al. Fostamatinib for the treatment of hospitalized adults with COVID-19 A randomized trial. *Clin Infect Dis* 2021 doi: 10.1093/cid/ciab732 [published Online First: 20210901]
328. Sun X, Zhang R, Li Y, et al. Clinical value of prophylactic liver protecting drugs in coronavirus disease 2019 (COVID-19). *J Xuzhou Med Univ* 2020;40(4):293-96.
329. Taher A, Lashgari M, Sedighi L, et al. A pilot study on intravenous N-Acetylcysteine treatment in patients with mild-to-moderate COVID19-associated acute respiratory distress syndrome. *Pharmacol Rep* 2021;73(6):1650-59. doi: 10.1007/s43440-021-00296-2 [published Online First: 20210610]
330. Tahmasebi S, El-Esawi MA, Mahmoud ZH, et al. Immunomodulatory effects of nanocurcumin on Th17 cell responses in mild and severe COVID-19 patients. *J Cell Physiol* 2021;236(7):5325-38. doi: 10.1002/jcp.30233 [published Online First: 20201228]
331. Mona T, Maryam A, Mahdi M, et al. *Research Square* 2022 doi: 10.21203/rs.3.rs-463921/v1
332. Tang W, Cao Z, Han M, et al. Hydroxychloroquine in patients with mainly mild to moderate coronavirus disease 2019: open label, randomised controlled trial. *BMJ* 2020;369:m1849. doi: 10.1136/bmj.m1849 [published Online First: 20200514]
333. Tang X, Feng YM, Ni JX, et al. Early Use of Corticosteroid May Prolong SARS-CoV-2 Shedding in Non-Intensive Care Unit Patients with COVID-19 Pneumonia: A Multicenter, Single-Blind, Randomized Control Trial. *Respiration* 2021;100(2):116-26. doi: 10.1159/000512063 [published Online First: 20210122]
334. Tardif JC, Bouabdallaoui N, L'Allier PL, et al. Colchicine for community-treated patients with COVID-19 (COLCORONA): a phase 3, randomised, double-blinded, adaptive, placebo-controlled, multicentre trial. *Lancet Respir Med* 2021;9(8):924-32. doi: 10.1016/S2213-2600(21)00222-8 [published Online First: 20210527]
335. Temesgen Z, Burger CD, Baker J, et al. Lenzilumab Efficacy and Safety in Newly Hospitalized Covid-19 Subjects: Results from the Live-Air Phase 3 Randomized Double-Blind Placebo-Controlled Trial. *medRxiv* 2021:2021.05.01.21256470. doi: 10.1101/2021.05.01.21256470 [published Online First: 20210505]
336. Thakar A, Panda S, Sakthivel P, et al. Chloroquine nasal drops in asymptomatic & mild COVID-19: An exploratory randomized clinical trial. *Indian J Med Res* 2021 doi: 10.4103/ijmr.IJMR\_3665\_20 [published Online First: 20210121]
337. group C-C. Effect of anakinra versus usual care in adults in hospital with COVID-19 and mild-to-moderate pneumonia (CORIMUNO-ANA-1): a randomised controlled trial. *Lancet Respir Med* 2021;9(3):295-304. doi: 10.1016/S2213-2600(20)30556-7 [published Online First: 20210122]
338. Zarychanski R. Therapeutic Anticoagulation in Critically Ill Patients with Covid-19 – Preliminary Report. *medRxiv* 2021:2021.03.10.21252749. doi: 10.1101/2021.03.10.21252749
339. Thomas S, Patel D, Bittel B, et al. Effect of High-Dose Zinc and Ascorbic Acid Supplementation vs Usual Care on Symptom Length and Reduction Among Ambulatory Patients With SARS-CoV-2 Infection: The COVID A to Z Randomized Clinical Trial. *JAMA Netw Open* 2021;4(2):e210369. doi: 10.1001/jamanetworkopen.2021.0369 [published Online First: 20210201]
340. Tolouian R, Mulla ZD, Jamaati H, et al. Effect of bromhexine in hospitalized patients with COVID-19. *J Investig Med* 2021 doi: 10.1136/jim-2020-001747 [published Online First: 20210315]
341. Tomazini BM, Maia IS, Cavalcanti AB, et al. Effect of Dexamethasone on Days Alive and Ventilator-Free in Patients With Moderate or Severe Acute Respiratory Distress Syndrome and COVID-19: The CoDEX Randomized Clinical Trial. *JAMA* 2020;324(13):1307-16. doi: 10.1001/jama.2020.17021
342. Tornling G, Batta R, Porter J, et al. The angiotensin type 2 receptor agonist C21 restores respiratory function in COVID19 - a double-blind, randomized, placebo-controlled Phase 2 trial. *medRxiv* 2021:2021.01.26.21250511. doi: 10.1101/2021.01.26.21250511

343. Trieu V, Saund S, Rahate PV, et al. Targeting TGF- $\beta$  pathway with COVID-19 Drug Candidate ARTIVeda/PulmoHeal Accelerates Recovery from Mild-Moderate COVID-19. *medRxiv* 2021:2021.01.24.21250418. doi: 10.1101/2021.01.24.21250418
344. Udawadia ZF, Singh P, Barkate H, et al. Efficacy and safety of favipiravir, an oral RNA-dependent RNA polymerase inhibitor, in mild-to-moderate COVID-19: A randomized, comparative, open-label, multicenter, phase 3 clinical trial. *Int J Infect Dis* 2021;103:62-71. doi: 10.1016/j.ijid.2020.11.142 [published Online First: 20201116]
345. Ulrich RJ, Troxel AB, Carmody E, et al. Treating COVID-19 With Hydroxychloroquine (TEACH): A Multicenter, Double-Blind Randomized Controlled Trial in Hospitalized Patients. *Open Forum Infect Dis* 2020;7(10):ofaa446. doi: 10.1093/ofid/ofaa446 [published Online First: 20200923]
346. Vaira LA, Hopkins C, Petrocelli M, et al. Efficacy of corticosteroid therapy in the treatment of long- lasting olfactory disorders in COVID-19 patients. *Rhinology* 2021;59(1):21-25. doi: 10.4193/Rhin20.515 [published Online First: 2020/12/09]
347. Valizadeh H, Abdolmohammadi-Vahid S, Danshina S, et al. Nano-curcumin therapy, a promising method in modulating inflammatory cytokines in COVID-19 patients. *Int Immunopharmacol* 2020;89(Pt B):107088. doi: 10.1016/j.intimp.2020.107088 [published Online First: 20201020]
348. Vallejos J, Zoni R, Bangher M, et al. Ivermectin to prevent hospitalizations in patients with COVID-19 (IVERCOR-COVID19) a randomized, double-blind, placebo-controlled trial. *BMC Infect Dis* 2021;21(1):635. doi: 10.1186/s12879-021-06348-5 [published Online First: 20210702]
349. Veiga VC, Prats J, Farias DLC, et al. Effect of tocilizumab on clinical outcomes at 15 days in patients with severe or critical coronavirus disease 2019: randomised controlled trial. *BMJ* 2021;372:n84. doi: 10.1136/bmj.n84 [published Online First: 20210120]
350. Vlaar APJ, de Bruin S, Busch M, et al. Anti-C5a Antibody (IFX-1) Treatment of Severe COVID-19: An Exploratory Phase 2 Randomized Controlled Trial. . Available at SSRN: <https://ssrncom/abstract=3658226> or <http://dxdoiorg/102139/ssrn3658226> 2020
351. World Health Organization. Unpublished data on Vyas molnupiravir trial (CTRI/2021/08/035424), 2021.
352. Wanaratna K, Leethong P, Inchai N, et al. Efficacy and safety of *Andrographis paniculata* extract in patients with mild COVID-19: A randomized controlled trial. *medRxiv* 2021:2021.07.08.21259912. doi: 10.1101/2021.07.08.21259912
353. Wang Y, Zhang D, Du G, et al. Remdesivir in adults with severe COVID-19: a randomised, double-blind, placebo-controlled, multicentre trial. *Lancet* 2020;395(10236):1569-78. doi: 10.1016/S0140-6736(20)31022-9 [published Online First: 20200429]
354. WANG Yali YX, LIU Yongping, ZHANG Jian, FENG Yifan,, SHANG Lei ZK, CHENG Zhijian, HE Xijing. Preliminary clinical effect analysis of the treatment of novel coronavirus pneumonia by internal administration of traditional Chinese medicine plus fumigation and absorption combined with super dose of vitamin C in treating COVID-19. *Journal of Xi'an Jiaotong University(Medical Sciences)* 2020
355. Wang S-Z WH-J, Chen H-M, et al. . Lianhua Qingwen capsule and interferon- $\alpha$  combined with lopinavir /ritonavir for the treatment of 30 COVID-19 patients. *B Bengbu Med Coll* 2020;45(2):154-55.
356. Wang D, Fu B, Peng Z, et al. Tocilizumab in patients with moderate or severe COVID-19: a randomized, controlled, open-label, multicenter trial. *Front Med* 2021;15(3):486-94. doi: 10.1007/s11684-020-0824-3 [published Online First: 20210309]
357. Wang M, Zhao Y, Hu W, et al. Treatment of Coronavirus Disease 2019 Patients With Prolonged Postsymptomatic Viral Shedding With Leflunomide: A Single-center Randomized Controlled Clinical Trial. *Clinical infectious diseases : an official publication of the Infectious Diseases Society of America* 2021;73(11):e4012-e19. doi: 10.1093/cid/ciaa1417
358. Bemcentinib, an oral AXL kinase inhibitor, results in lower mortality compared to standard of care (steroids with or without remdesivir) in hospitalised patients with COVID-19. Two randomised phase 2 studies: BGBC020 and ACCORD2. 31st European Congress of Clinical Microbiology and Infectious Diseases; 2021 July 12, 2021; Online.
359. Winchester S, John S, Jabbar K, et al. Clinical efficacy of nitric oxide nasal spray (NONS) for the treatment of mild COVID-19 infection. *J Infect* 2021;83(2):237-79. doi: 10.1016/j.jinf.2021.05.009 [published Online First: 20210513]
360. Winthrop KL, Skolnick AW, Rafiq AM, et al. Opaganib in COVID-19 pneumonia: Results of a randomized, placebo-controlled Phase 2a trial. *medRxiv* 2021:2021.08.23.21262464. doi: 10.1101/2021.08.23.21262464
361. Wu X, Yu K, Wang Y, et al. Efficacy and Safety of Triazavirin Therapy for Coronavirus Disease 2019: A Pilot Randomized Controlled Trial. *Engineering (Beijing)* 2020;6(10):1185-91. doi: 10.1016/j.eng.2020.08.011 [published Online First: 20200908]
362. Yadegarinia D, Tehrani S, Abolghasemi S, et al. Evaluation of the Efficacy of Arbidol in Comparison with the Standard Treatment Regimen of Hospitalized Patients with Covid-19: A Randomized Clinical Trial. *Archives of Clinical Infectious Diseases* 2020;15(5):e106622. doi: 10.5812/archcid.106622
363. Yadollahzadeh M, Eskandari M, Roham M, et al. Evaluation of Sovodak (Sofosbuvir/Daclatasvir Treatment Outcome in COVID-19 Patient's Compared with Kaletra (Lopinavir/ritonavir): a Randomized Clinical Trial. *Research Square* 2021 doi: 10.21203/rs.3.rs-257762/v1

364. Yaghoubian H, Niktale H, Yazdi AP, et al. Evaluate the Therapeutic Effect of Allicin (L-cysteine) on Clinical Presentation and Prognosis in Patients with COVID-19. *Eur J Transl Myol* 2021;31(2) doi: 10.4081/ejtm.2021.9518 [published Online First: 20210618]
365. Yakoot M, Eysa B, Gouda E, et al. Efficacy and Safety of Sofosbuvir/Daclatasvir in the Treatment of COVID-19: A Randomized, Controlled Study. *SSRN Electronic Journal* 2020
366. Vityala Y, Tugolbai T, Melis Sholpanbai U, et al. Efficacy of umifenovir in the treatment of mild and moderate COVID-19 patients. *International Journal of Research in Pharmaceutical Sciences* 2020;11(SPL1):506-09. doi: 10.26452/ijrps.v11iSPL1.2839
367. Yildiz E, Koca Yildiz S, Kuzu S, et al. Comparison of the Healing Effect of Nasal Saline Irrigation with Triamcinolone Acetonide Versus Nasal Saline Irrigation alone in COVID-19 Related Olfactory Dysfunction: A Randomized Controlled Study. *Indian J Otolaryngol Head Neck Surg* 2021;1-6. doi: 10.1007/s12070-021-02749-9 [published Online First: 20210710]
368. Yogesh A. Dound MSSSDB. Efficacy and Tolerability of Curmune Formulation in the Management of COVID-19: A Randomised Comparative Clinical Study. *The Indian Practitioner* 2021;74(3)
369. Youssef J, Lee R, Javitt J, et al. Effectiveness of ZYESAMI™ (Aviptadil) in accelerating recovery and shortening hospitalization in critically-ill patients with COVID-19 Respiratory Failure: interim report from a phase 2b/3 multicenter trial: SSRN, 2021.
370. Yu LM, Bafadhel M, Dorward J, et al. Inhaled budesonide for COVID-19 in people at high risk of complications in the community in the UK (PRINCIPLE): a randomised, controlled, open-label, adaptive platform trial. *Lancet* 2021;398(10303):843-55. doi: 10.1016/s0140-6736(21)01744-x [published Online First: 20210810]
371. Yuan X, Yi W, Liu B, et al. Pulmonary radiological change of COVID-19 patients with 99mTc-MDP treatment. *medRxiv* 2020:2020.04.07.20054767. doi: 10.1101/2020.04.07.20054767
372. Zarehoseinzade E, Allami A, Ahmadi M, et al. Finasteride in hospitalized adult males with COVID-19: A risk factor for severity of the disease or an adjunct treatment: A randomized controlled clinical trial. *Med J Islam Repub Iran* 2021;35:30. doi: 10.47176/mjiri.35.30 [published Online First: 20210303]
373. Zhang J, Rao X, Li Y, et al. Pilot trial of high-dose vitamin C in critically ill COVID-19 patients. *Ann Intensive Care* 2021;11(1):5. doi: 10.1186/s13613-020-00792-3 [published Online First: 20210109]
374. Zhang BY, Chen M, Chen XC, et al. Berberine reduces circulating inflammatory mediators in patients with severe COVID-19. *Br J Surg* 2021;108(1):e9-e11. doi: 10.1093/bjs/znaa021
375. Zhang XY, Lv L, Zhou YL, et al. Efficacy and safety of Xiyanping injection in the treatment of COVID-19: A multicenter, prospective, open-label and randomized controlled trial. *Phytother Res* 2021;35(8):4401-10. doi: 10.1002/ptr.7141 [published Online First: 20210512]
376. Zhao H, Zhu Q, Zhang C, et al. Tocilizumab combined with favipiravir in the treatment of COVID-19: A multicenter trial in a small sample size. *Biomed Pharmacother* 2021;133:110825. doi: 10.1016/j.biopha.2020.110825 [published Online First: 20200930]
377. Zhao H, Zhang C, Zhu Q, et al. Favipiravir in the treatment of patients with SARS-CoV-2 RNA recurrent positive after discharge: A multicenter, open-label, randomized trial. *Int Immunopharmacol* 2021;97:107702. doi: 10.1016/j.intimp.2021.107702 [published Online First: 20210421]
378. Zheng W, G J. Clinical Observation of Tanshinone II A Sulfonate in the Treatment of New Coronary Pneumonia. *Digest of the world's latest medical information* 2020 2020
379. Zheng F, Zhou Y, Zhou Z, et al. SARS-CoV-2 clearance in COVID-19 patients with Novaferon treatment: A randomized, open-label, parallel-group trial. *Int J Infect Dis* 2020;99:84-91. doi: 10.1016/j.ijid.2020.07.053 [published Online First: 20200803]
380. Zhong M, Sun A, Xiao T, et al. A Randomized, Single-blind, Group sequential, Active-controlled Study to evaluate the clinical efficacy and safety of  $\alpha$ -Lipoic acid for critically ill patients with coronavirus disease 2019 (COVID-19) . *medRxiv* 2020 doi: 10.1101/2020.04.15.20066266
381. ZHOU Waimin1 ZF, LI Banglong, TIAN Zhongqiu1. Clinical Value of Diammonium Glycyrrhizinate in Treatment of COVID-19. *Chinese Journal of Virology* 2020;36(2)
382. Zhuravel SV, Khmelnitskiy OK, Burlaka OO, et al. Nafamostat in hospitalized patients with moderate to severe COVID-19 pneumonia: a randomised Phase II clinical trial. *EClinicalMedicine* 2021;41:101169. doi: 10.1016/j.eclinm.2021.101169 [published Online First: 20211027]
383. de Alencar JCG, Moreira CL, Muller AD, et al. Double-blind, Randomized, Placebo-controlled Trial With N-acetylcysteine for Treatment of Severe Acute Respiratory Syndrome Caused by Coronavirus Disease 2019 (COVID-19). *Clin Infect Dis* 2021;72(11):e736-e41. doi: 10.1093/cid/ciaa1443

Studies included in analysis for each outcome

**Mortality (1/3)**

|                         |                                |                  |                           |
|-------------------------|--------------------------------|------------------|---------------------------|
| ARCHITECTS_NCT04412772_ | Beigel                         | Chahla           | Ely                       |
| ARCHITECTS_NCT04412772_ | Bhushan                        | Chen_2           | Ezer                      |
| Abbass                  | Bikdeli                        | Chen_3           | Farnoosh                  |
| Abd-Elsalam_1           | Blum                           | Chen_4           | Fischer                   |
| Abd-Elsalam_3           | Bosaeed                        | Chen_5           | Fisher_1                  |
| Abd-Elsalam_4           | Brown                          | Cheng            | Furtado                   |
| Ader_1                  | Butler                         | Clemency         | Gait?n-Duarte             |
| Ader_2                  | CORIMUNO-SARI-1_NCT04324073_A  | Cohen            | Galan                     |
| Alamdari                | CORIMUNO-SARI-1_NCT04324073_B  | Connors          | Geriak                    |
| Alavi-Moghaddam         | CORIMUNO-SARI-ICU_NCT04324073_ | Corral-Gudino    | Ghanei                    |
| Aman                    | CORIMUNO-SARI-ICU_NCT04324073_ | Cremer_1         | Ghati                     |
| Amaravadi               | CORIMUNO-TOCI-ICU_NCT04331808_ | Cremer_2         | Gonzalez                  |
| Ananworanich            | CORIMUNO-TOCI-ICU_NCT04331808_ | Criner           | Gonzalez Ochoa            |
| Angus                   | COV-AID_NCT04330638_A          | Darazam_2        | Gordon_1_A                |
| Arabi                   | COV-AID_NCT04330638_B          | Darazam_3        | Gordon_1_B                |
| Axfors_ChiCTR2000031204 | COVIDOSE2-SSA_NCT04479358_A    | Davoudi-Monfareh | Gordon_1_C                |
| Axfors_NCT04323527      | COVIDOSE2-SSA_NCT04479358_B    | Deftereios       | Gordon_1_D                |
| Axfors_NCT04333654      | COVIDSTORM_NCT04577534_A       | Delgado-Enciso   | Gottlieb                  |
| Axfors_NCT04335552      | COVIDSTORM_NCT04577534_B       | Dequin           | Guimar?es                 |
| Axfors_NCT04338698      | COVIT0Z_NCT04435717_A          | Doaei            | Gunst                     |
| Axfors_NCT04340544      | COVIT0Z_NCT04435717_B          | Dorward          | Gutiérrez-Castrell?n      |
| Axfors_NCT04342221      | Cadegiani_2                    | Duarte           | HMO-020-0224_NCT04377750_ |
| Axfors_NCT04342650      | Cadegiani_4                    | Dubee            | HMO-020-0224_NCT04377750_ |
| Axfors_NCT04345289      | Cadegiani_5                    | EPIC-HR          | Hamed                     |
| Axfors_NCT04345692      | Cao_1                          | Edalatifard      | Hamidi-Alamdari           |
| Axfors_NL8490           | Cao_2                          | Eid              | Hasan                     |
| Babalola                | Caricchio                      | El-Bendary       | Hermine_A                 |
| Balykova_1              | Castillo                       | Elamir           | Hermine_B                 |
| Bauer                   | Cavalcanti                     | Elgohary         | Hermine_toci              |

**Mortality (2/3)**

|                        |                                    |                        |                                |
|------------------------|------------------------------------|------------------------|--------------------------------|
| Hernandez-Cardenas     | Lakkireddy                         | Pan_hydroxychloroquine | SARCOVID_NCT04357808_A         |
| Hinks                  | Lawler                             | Pan_interferon         | SARCOVID_NCT04357808_B         |
| Horby_1                | Lemos                              | Pan_lopinavir          | SARICOR_EudraCT2020-001531-27_ |
| Horby_2                | Lenze                              | Pan_remdesivir         | SARICOR_EudraCT2020-001531-27_ |
| Horby_3                | Lescure                            | Pandit                 | SARTRE_EudraCT2020-002037-15_A |
| Horby_4                | Li                                 | Parienti               | SARTRE_EudraCT2020-002037-15_B |
| Horby_5_A              | Lomakin                            | Pascual-Figal          | Sadeghi                        |
| Horby_5_B              | Lopes_1                            | Patel_2                | Salama_A                       |
| Horby_6                | Lopes_2                            | Perepu                 | Salama_B                       |
| Horby_7                | Lopes_3                            | Puskarich              | Salehzadeh                     |
| ImmCoVA_NCT04412291_   | Lopez-Medina                       | Puskarich_2            | Salvarani                      |
| ImmCoVA_NCT04412291_   | Lou                                | REMDACTA_NCT04409262_  | Sayad                          |
| Ivashchenko            | Lyngbakken                         | REMDACTA_NCT04409262_  | Schwartz_2                     |
| Ivashkin               | MOVE-OUT (MK4482-002)              | RUXCOVID               | Sekhavati                      |
| Jamaati                | Maghbooli                          | Rahmani                | Self                           |
| JamaliMoghadamSiahkali | Mahajan                            | Ramachandran           | Shinkai                        |
| Jeronimo               | Mahmud                             | Rashad_2               | Sholzberg                      |
| Johnston               | Marconi                            | Rashad_3               | Silva                          |
| Kalil                  | Marcos                             | Ravikirti              | Sivapalan                      |
| Kalil_2                | Mobarak                            | Reis_1                 | Sivapalasingam_P2_A            |
| Khodashahi             | Mohan                              | Reis_2                 | Sivapalasingam_P2_B            |
| Khoo                   | Munch_1                            | Rocco                  | Sivapalasingam_P3_C1_A         |
| Kosiborod              | Murai                              | Rodrigues              | Sivapalasingam_P3_C1_B         |
| Kosmopoulos            | Niaee                              | Rosas_A                | Sivapalasingam_P3_C2_Critical  |
| Krishnan               | Nourian                            | Rosas_B                | Sivapalasingam_P3_C3_Critical  |
| Krolewiecki            | Oldenburg                          | Rossignol              | Skipper                        |
| Kumar                  | Oliynyk                            | Rutgers_A              | Soin                           |
| Kumari                 | Omran                              | Rutgers_B              | Solaymani-Dodaran              |
| Kyriazopoulou          | PRINCIPLE Trial Collaborative Grou | Réa?Neto               | Song                           |

**Mortality (3/3)**

|                                                   |            |
|---------------------------------------------------|------------|
| Spinner                                           | Youssef    |
| Spyropoulos                                       | Zhang_1    |
| Sterne_NCT04244591                                | Zhao_2     |
| Sterne_NCT04325061                                | Zhuravel   |
| Stone_A                                           | de Alencar |
| Stone_B                                           |            |
| Strich                                            |            |
| TOCOVID_EudraCT2020-001442-19                     |            |
| Taher                                             |            |
| Talaschian                                        |            |
| Tang_1                                            |            |
| Tang_2                                            |            |
| Tardif                                            |            |
| Temesgen                                          |            |
| The CORIMUNO-19 Collaborative group               |            |
| The REMAP-CAP, ACTIV-4a, and ATTACC Investigators |            |
| Thomas                                            |            |
| Tomazini                                          |            |
| Udwadia                                           |            |
| Ulrich                                            |            |
| Vallejos                                          |            |
| Veiga_A                                           |            |
| Veiga_B                                           |            |
| Vyas                                              |            |
| Wang_1                                            |            |
| Yadegarinia                                       |            |
| Yadollahzadeh                                     |            |
| Yakoot                                            |            |
| Yethindra                                         |            |

**Mechanical ventilation**

|                 |                   |                        |                                     |                                     |
|-----------------|-------------------|------------------------|-------------------------------------|-------------------------------------|
| Abbass          | Cremer_2          | Horby_3                | Oliynyk                             | Soin                                |
| Abd-Elsalam_1   | Dabbous_2         | Horby_4                | PRINCIPLE Trial Collaborative Group | Solaymani-Dodaran                   |
| Abd-Elsalam_3   | Darazam_2         | Horby_5                | Pan_hydroxychloroquine              | Spinner                             |
| Abd-Elsalam_4   | Davoodi_2         | Horby_6                | Pan_interferon                      | Spyropoulos                         |
| Ader_1          | Davoudi-Monfaredi | Horby_7                | Pan_lopinavir                       | Stone                               |
| Ader_2          | Deftereos         | Ivashchenko            | Pan_remdesivir                      | Strich                              |
| Ahmed           | Dequin            | Jamaati                | Pandit                              | Taher                               |
| Alavi-Moghaddam | Dorward           | JamaliMoghaddamSiahkal | Pascual-Figal                       | Talaschian                          |
| Aman            | Duarte            | Jeronimo               | Pott-Junior                         | Tang_2                              |
| Ananworanich    | Dubee             | Kalil                  | Puskarich                           | Tardif                              |
| Angus           | Edalatifard       | Kalil_2                | Puskarich_2                         | The CORIMUNO-19 Collaborative group |
| Arabi           | El-Bendary        | Kosiborod              | RUXCOVID                            | Tomazini                            |
| Balykova_1      | Fisher_1          | Krolewiecki            | Rahmani                             | Udwadia                             |
| Bauer           | Furtado           | Kumari                 | Ravikirti                           | Ulrich                              |
| Beigel          | Gait?n-Duarte     | Kyriazopoulou          | Rosas_A                             | Vallejos                            |
| Bhushan         | Galan             | Lescure                | Rosas_B                             | Veiga                               |
| Bosaeed         | Geriak            | Lomakin                | Rutgers                             | Vyas                                |
| Brown           | Ghanei            | Lopes_1                | Ruzhentsova                         | Wang_1                              |
| Butler          | Ghati             | Lopes_3                | Réa?Neto                            | Yakoot                              |
| Cadegiani_2     | Gonzalez Ochoa    | Lopez-Medina           | Sadeghi                             | Yu                                  |
| Cadegiani_4     | Gordon_1          | Lou                    | Salama                              | Zhang_1                             |
| Cadegiani_5     | Guimar?es         | Lyngbakken             | Salvarani                           | de Alencar                          |
| Cao_1           | Gunst             | Maghbooli              | Sayad                               | Reis_2                              |
| Cao_2           | Hamed             | Mahajan                | Schwartz_2                          | Lenze                               |
| Caricchio       | Hermine           | Marconi                | Sekhavati                           |                                     |
| Cavalcanti      | Hermine_toci      | Mobarak                | Self                                |                                     |
| Cheng           | Hinks             | Mohan                  | Shinkai                             |                                     |
| Cohen           | Horby_1           | Murai                  | Sholzberg                           |                                     |
| Corral-Gudino   | Horby_2           | Nourian                | Sivapalan                           |                                     |

**Adverse events**

|                   |                      |                               |                               |
|-------------------|----------------------|-------------------------------|-------------------------------|
| Ader_1            | EPIC-HR              | Mahajan                       | Sivapalasingam_P3_C3_Critical |
| Aman              | Elgohary             | Mahmud                        | Song                          |
| Ananworanich      | Ely                  | Marconi                       | Strich                        |
| Babalola          | Fischer              | Mobarak                       | Taher                         |
| Babalola_2        | Gait?n-Duarte        | Nourian                       | Talaschian                    |
| Balykova_2        | Geriak               | Omrani                        | Tang_1                        |
| Barratt-Due       | Ghati                | Parienti                      | Udwadia                       |
| Beigel            | Gonzalez Ochoa       | Pascual-Figal                 | Vallejos                      |
| Blum              | Gottlieb             | Pott-Junior                   | Vyas                          |
| Brown             | Guimar?es            | Purwati                       | Wang_1                        |
| Buonfrate         | Gunst                | RUXCOVID                      | Yakoot                        |
| Byakika-Kibwika   | Gutiérrez-Castrell?n | Rastogi                       | Zhuravel                      |
| Cadegiani_3       | Hernandez-Cardenas   | Ravichandran                  | de Alencar                    |
| Cadegiani_4       | Ivashchenko          | Reis_1                        |                               |
| Caricchio         | Johnston             | Rocco                         |                               |
| Castillo          | Kalil_2              | Rosas                         |                               |
| Chahla            | Kasiri               | Rossignol                     |                               |
| Chen_3            | Khodashahi           | Ruzhentsova                   |                               |
| Chen_4            | Khoo                 | Réa?Neto                      |                               |
| Clemency          | Kosiborod            | Salama                        |                               |
| Cohen             | Krishnan             | Sayad                         |                               |
| Criner            | Krolewiecki          | Schwartz_2                    |                               |
| Darazam_2         | Kumar                | Sekhavati                     |                               |
| Darazam_3         | Kyriazopoulou        | Shinkai                       |                               |
| Davoudi-Monfaredi | Lakkireddy           | Silva                         |                               |
| Deftereios        | Li                   | Sivapalan                     |                               |
| Delgado-Enciso    | Lopes_2              | Sivapalasingam_P2             |                               |
| Duarte            | Lopez-Medina         | Sivapalasingam_P3_C1          |                               |
| Dubee             | MOVE-OUT (MK4482-002 | Sivapalasingam_P3_C2_Critical |                               |

**Admission to hospital**

Amaravadi  
 Ananworanich  
 Cadegiani\_2  
 Cadegiani\_4  
 Clemency  
 Connors  
 Delgado-Enciso  
 EPIC-HR  
 Ezer  
 Fischer  
 Gonzalez Ochoa  
 Gottlieb  
 Gutiérrez-Castrell?  
 Hinks  
 Johnston  
 Kasiri  
 Krishnan  
 Kumar  
 Lenze  
 Lopez-Medina  
 MOVE-OUT (MK4482-002)  
 Oldenburg  
 Omrani  
 PRINCIPLE Trial Collaborative Group  
 Reis\_1  
 Reis\_2  
 Rocco  
 Rodrigues  
 Rossignol

**VTE**

STOP-COVID-2 Bikdeli  
 Schwartz\_2 Connors  
 Shrivastava Gonzalez Ochoa  
 Skipper Lawler  
 Tardif Lemos  
 Vallejos Lopes\_3  
 Vyas Marcos  
 Perepu  
 Sholzberg  
 Spyropoulos  
 The REMAP-CAP, ACTIV-4a, and ATTACC

**Bleeding**

Ananworanich  
 Bikdeli  
 Connors  
 Gonzalez Ochoa  
 Lawler  
 Lemos  
 Lopes\_3  
 Marcos  
 Oliynyk  
 Perepu  
 Sholzberg  
 Spyropoulos  
 The REMAP-CAP, ACTIV-4a, and ATTACC

**Length of hospitalization**

|                 |                       |                       |                   |
|-----------------|-----------------------|-----------------------|-------------------|
| Abd-Elsalam_1   | Davoodi_2             | Jeronimo              | Rahmani           |
| Abd-Elsalam_3   | Davoudi-Monfared      | Johnston              | Rosas             |
| Abd-Elsalam_4   | Deftereos             | Kalil                 | Rutgers           |
| Ader_1          | Dorward               | Kalil_2               | Réa?Neto          |
| Ader_2          | Duarte                | Khodashahi            | Sadeghi           |
| Ahmed           | Elamir                | Kumari                | Salama            |
| Alamdari        | Elgohary              | Kyriazopoulou         | Salehzadeh        |
| Alavi-Moghaddam | Ely                   | Lakkireddy            | Salvarani         |
| Aman            | Furtado               | Lemos                 | Sayad             |
| Angus           | Gait?n-Duarte         | Lescure               | Sekhavati         |
| Arabi           | Geriak                | Lomakin               | Sivapalan         |
| Bauer           | Ghati                 | Lopes_1               | Solaymani-Dodaran |
| Beigel          | Gonzalez              | Lopes_2               | Spinner           |
| Bhushan         | Gordon_1              | Lopes_3               | Stone             |
| Bosaeed         | Guimar?es             | Lyngbakken            | Taher             |
| Butler          | Gunst                 | Marconi               | Tang_2            |
| Cao_1           | Hamed                 | Mobarak               | Udwadia           |
| Cao_2           | Hamidi-Alamdari       | Murai                 | Ulrich            |
| Caricchio       | Hernandez-Cardenas    | Niaee                 | Veiga             |
| Cavalcanti      | Hinks                 | Nourian               | Wang_1            |
| Chen_4          | Horby_1               | Pan_hydroxychloroquin | Wang_4            |
| Cheng           | Horby_2               | Pan_interferon        | Yadegarinia       |
| Cohen           | Horby_3               | Pan_lopinavir         | Yadollahzadeh     |
| Corral-Gudino   | Horby_4               | Pan_remdesivir        | Zhang_1           |
| Cremer_2        | Horby_6               | Pandit                | Zhuravel          |
| Dabbous_1       | Horby_7               | Pascual-Figal         | de Alencar        |
| Dabbous_2       | Huang_1               | Patel_2               |                   |
| Darazam_2       | Jamaati               | Puskarich_2           |                   |
| Darazam_3       | JamaliMoghadamSiahkal | RUXCOVID              |                   |

**Time to symptom resolution**

|                  |                                     |
|------------------|-------------------------------------|
| Abd-Elsalam_1    | Eid                                 |
| Ader_1           | Elgohary                            |
| Ader_2           | Fisher_1                            |
| Alavi-Moghaddam  | Gunst                               |
| Amaravadi        | Gutiérrez-Castrell?                 |
| Balykova_1       | Huang_1                             |
| Beigel           | Ivashchenko                         |
| Bhushan          | Johnston                            |
| Bosaeed          | Kalil                               |
| Brown            | Kalil_2                             |
| Butler           | Krishnan                            |
| Byakika-Kibwika  | Kumar                               |
| Cadegiani_3      | Kumari                              |
| Cao_1            | Lescure                             |
| Cao_2            | Lopez-Medina                        |
| Caricchio        | Lou                                 |
| Chahla           | Mahmud                              |
| Chen_1           | Marconi                             |
| Chen_2           | Mohan                               |
| Chen_3           | Nourian                             |
| Chen_4           | PRINCIPLE Trial Collaborative Group |
| Cheng            | Patel_2                             |
| Clemency         | RUXCOVID                            |
| Cremer_1         | Rahmani                             |
| Cremer_2         | Ramakrishnan                        |
| Darazam_2        | Rashad_1                            |
| Darazam_3        | Rashad_3                            |
| Davoudi-Monfared | Rosas                               |
| Delgado-Enciso   | Rossignol                           |

**Duration of ventilation**

|             |                                 |
|-------------|---------------------------------|
| Ruzhentsov  | ARCHITECTS_NCT04412772_A        |
| Sadeghi     | Beigel                          |
| Salama      | CORIMUNO-SARI-ICU_NCT04324073   |
| Sayad       | CORIMUNO-TOCI-ICU_NCT04331808_A |
| Schwartz_2  | CORIMUNO-TOCI-ICU_NCT04331808_B |
| Self        | COV-AID_NCT04330638_A           |
| Soin        | COV-AID_NCT04330638_B           |
| Solaymani-D | Davoudi-Monfared                |
| Spinner     | Ely                             |
| Stone       | Gordon_1_A                      |
| Talaschian  | Gordon_1_B                      |
| Tang_1      | HMO-020-0224_NCT04377750_A      |
| Temesgen    | Hamed                           |
| Thomas      | Horby_5_A                       |
| Udwadia     | Horby_5_B                       |
| Vyas        | Kalil                           |
| Wang_1      | Kalil_2                         |
| Wang_4      | Lopes_3                         |
| Yakoot      | Mahajan                         |
| Yethindra   | Rosas_A                         |
| Yu          | Rosas_B                         |
| Zhuravel    | Rutgers                         |
|             | Soin                            |
|             | Stone                           |
|             | Tomazini                        |
|             | Veiga_A                         |
|             | Veiga_B                         |
|             | Wang_1                          |

Description of studies excluded at full text stage

## Description of studies excluded at full text screening stage (n=591)

*This table does not list prophylaxis or antiviral antibody and cellular treatment studies, which are included in separate published network meta-analyses. References available upon request.*

| Study               | Title                                                                                                                                                                                                                                         | Reason for exclusion                                   |
|---------------------|-----------------------------------------------------------------------------------------------------------------------------------------------------------------------------------------------------------------------------------------------|--------------------------------------------------------|
| Liu 2020            | Effects of progressive muscle relaxation on anxiety and sleep quality in patients with COVID-19                                                                                                                                               | Exercise/rehabilitation                                |
| Villar 2020         | Dexamethasone treatment for the acute respiratory distress syndrome: a multicentre, randomised controlled trial                                                                                                                               | Wrong population                                       |
| Zeng 2020           | Comparative effectiveness and safety of ribavirin plus interferon-alpha, lopinavir/ritonavir plus interferon-alpha and ribavirin plus lopinavir/ritonavir plus interferon-alpha in patients with mild to moderate novel coronavirus pneumonia | Randomized trial with no results (e.g. trial registry) |
| Bian 2020           | Meplazumab treats COVID-19 pneumonia: an open-labelled, concurrent controlled add-on clinical trial                                                                                                                                           | Not a randomized trial                                 |
| Gautret 2020        | Hydroxychloroquine and azithromycin as a treatment of COVID-19: results of an open-label non-randomized clinical trial                                                                                                                        | Not a randomized trial                                 |
| Gautret 2020        | Hydroxychloroquine and Azithromycin as a treatment of COVID-19: preliminary results of an open-label non-randomized clinical trial                                                                                                            | Not a randomized trial                                 |
| Cai 2020            | Experimental Treatment with Favipiravir for COVID-19: An Open-Label Control Study                                                                                                                                                             | Not a randomized trial                                 |
| Xiao Qi 2020        | Analysis of the value of traditional Chinese medicine Shufeng Jiedu Capsules combined with Arbidol in the treatment of mild new coronavirus pneumonia                                                                                         | Not a randomized trial                                 |
| Liu 2020            | Respiratory rehabilitation in elderly patients with COVID-19: A randomized controlled study                                                                                                                                                   | Not a randomized trial                                 |
| Azhar 2020          | Hydroxychloroquine, Oseltamivir and Azithromycin for the Treatment of COVID-19 Infection: An RCT                                                                                                                                              | Randomized trial with no results (e.g. trial registry) |
| Carr 2020           | A new clinical trial to test high-dose vitamin C in patients with COVID-19                                                                                                                                                                    | Not a randomized trial                                 |
| Mahevas 2020        | No evidence of clinical efficacy of hydroxychloroquine in patients hospitalized for COVID-19 infection with oxygen requirement: results of a study using routinely collected data to emulate a target trial                                   | Not a randomized trial                                 |
| Xie 2020            | Effect of regular intravenous immunoglobulin therapy on prognosis of severe pneumonia in patients with COVID-19                                                                                                                               | Not a randomized trial                                 |
| Zhu 2020            | Arbidol Monotherapy is Superior to Lopinavir/ritonavir in Treating COVID-19                                                                                                                                                                   | Not a randomized trial                                 |
| Ye 2020             | Guideline-based Chinese herbal medicine treatment plus standard care for severe coronavirus disease 2019 (G-CHAMPS): evidence from China                                                                                                      | Traditional Chinese or alternative medicine            |
| Meng 2020           | An experimental trial of recombinant human interferon alpha nasal drops to prevent coronavirus disease 2019 in medical staff in an epidemic area                                                                                              | Not a randomized trial                                 |
| Alabama 2020        | Trial of Hydroxychloroquine In Covid-19 Kinetics                                                                                                                                                                                              | Randomized trial with no results (e.g. trial registry) |
| Zha 2020            | Corticosteroid treatment of patients with coronavirus disease 2019 (COVID-19)                                                                                                                                                                 | Not a randomized trial                                 |
| Ye 2020             | Clinical efficacy of lopinavir/ritonavir in the treatment of Coronavirus disease 2019                                                                                                                                                         | Not a randomized trial                                 |
| Zhou 2020           | Interferon-a2b treatment for COVID-19                                                                                                                                                                                                         | Not a randomized trial                                 |
| Biosciences 2020    | Efficacy and Safety Study of Allogeneic HB-adMSCs for the Treatment of COVID-19                                                                                                                                                               | Randomized trial with no results (e.g. trial registry) |
| Branch-Elliman 2020 | Sarilumab for Patients With Moderate COVID-19 Disease: A Randomized Controlled Trial With a Play-The-Winner Design                                                                                                                            | Randomized trial with no results (e.g. trial registry) |
| Cantini 2020        | Baricitinib therapy in COVID-19: A pilot study on safety and clinical impact                                                                                                                                                                  | Not a randomized trial                                 |
| Castello 2020       | Pilot Study on Cytokine Filtration in COVID-19 ARDS                                                                                                                                                                                           | Randomized trial with no results (e.g. trial registry) |

|                        |                                                                                                                                                                                                                                                                |                                                        |
|------------------------|----------------------------------------------------------------------------------------------------------------------------------------------------------------------------------------------------------------------------------------------------------------|--------------------------------------------------------|
| Center 2020            | Hyperbaric Oxygen Therapy Effect in COVID-19 RCT (HBOTCOVID19)                                                                                                                                                                                                 | Randomized trial with no results (e.g. trial registry) |
| Center 2020            | Plasma Collection From Convalescent and/or Immunized Donors for the Treatment of COVID-19                                                                                                                                                                      | Randomized trial with no results (e.g. trial registry) |
| Center 2020            | Ruxolitinib for Treatment of Covid-19 Induced Lung Injury ARDS                                                                                                                                                                                                 | Randomized trial with no results (e.g. trial registry) |
| Center 2020            | COVID-19 Patient Positioning Pragmatic Trial                                                                                                                                                                                                                   | Randomized trial with no results (e.g. trial registry) |
| Colombia 2020          | Effectiveness and Safety of Medical Treatment for SARS-CoV-2 (COVID-19) in Colombia                                                                                                                                                                            | Randomized trial with no results (e.g. trial registry) |
| Karahmet 2020          | Potential effect of natural and anabolizan steroids in elderly patient with COVID-19                                                                                                                                                                           | Not a randomized trial                                 |
| LabibSalem 2020        | The possible beneficial adjuvant effect of Influenza vaccine to minimize the severity of COVID-19                                                                                                                                                              | Not a randomized trial                                 |
| Lenkens 2020           | [Medication and comedication in COVID-19 patients]                                                                                                                                                                                                             | Not a randomized trial                                 |
| Diurno 2020            | Ecilizumab treatment in patients with COVID-19: preliminary results from real life ASL Napoli 2 Nord experience                                                                                                                                                | Not a randomized trial                                 |
| Mohammadzadeh 2020     | Effectiveness of electronic health care and drug monitoring program to prevent COVID-19 and adherence to therapeutic regimen in patients with ischemic heart disease - A pilot study                                                                           | Others                                                 |
| Schumacher 2020        | The impact of respiratory protective equipment on difficult airway management: a randomised, crossover, simulation study                                                                                                                                       | Wrong population                                       |
| Plaze 2020             | Repurposing of chlorpromazine in COVID-19 treatment: the reCoVery study                                                                                                                                                                                        | Randomized trial with no results (e.g. trial registry) |
| Ankrum 2020            | Can cell therapies halt cytokine storm in severe COVID-19 patients?                                                                                                                                                                                            | Not a randomized trial                                 |
| Toniati 2020           | Tocilizumab for the treatment of severe COVID-19 pneumonia with hyperinflammatory syndrome and acute respiratory failure: A single center study of 100 patients in Brescia, Italy                                                                              | Not a randomized trial                                 |
| Havlichek 2020         | A Trial of Lopinavir-Ritonavir in Covid-19                                                                                                                                                                                                                     | Not a randomized trial                                 |
| Hong 2020              | Celebrex adjuvant therapy on COVID-19: An experimental study                                                                                                                                                                                                   | Not a randomized trial                                 |
| Liu 2020               | [Significance and operation mode of moxibustion intervention for the group under quarantine after close contact with COVID-19]                                                                                                                                 | Exercise/rehabilitation                                |
| Hu 2020                | Efficacy and Safety of Lianhuaqingwen Capsules, a repurposed Chinese Herb, in Patients with Coronavirus disease 2019: A multicenter, prospective, randomized controlled trial                                                                                  | Traditional Chinese or alternative medicine            |
| Plaze 2020             | [Repurposing chlorpromazine to treat COVID-19: the reCoVery study]                                                                                                                                                                                             | Randomized trial with no results (e.g. trial registry) |
| Li 2020                | Application of CareDose 4D combined with Karl 3D technology in the low dose computed tomography for the follow-up of COVID-19                                                                                                                                  | Diagnostic imaging                                     |
| Feeney 2020            | The COVIRL-001 Trial: A multicentre, prospective, randomised trial comparing standard of care (SOC) alone, SOC plus hydroxychloroquine monotherapy or SOC plus a combination of hydroxychloroquine and azithromycin in the treatment of non-critical, SARS-CoV | Randomized trial with no results (e.g. trial registry) |
| Feily 2020             | COVID-19: Pentoxifylline as a potential adjuvant treatment                                                                                                                                                                                                     | Not a randomized trial                                 |
| Hu 2020                | Chansu Injection Improves the Respiratory Function of Severe COVID-19 Patients                                                                                                                                                                                 | Traditional Chinese or alternative medicine            |
| LuisCallejasRubio 2020 | De Los Pulsos De Corticoides En Pacientes Con Síndrome De Liberación De Citoquinas Inducido Por Infección Por Sars-Cov-2                                                                                                                                       | Not a randomized trial                                 |
| Wang 2020              | Efficacy and Safety of Leflunomide for Refractory COVID-19: An Open-label Controlled Study                                                                                                                                                                     | Not a randomized trial                                 |
| Casadevall 2020        | A Randomized Trial of Convalescent Plasma for COVID-19-Potentially Hopeful Signals                                                                                                                                                                             | Not a randomized trial                                 |
| Pompeii 2020           | Training and Fit Testing of Health Care Personnel for Reusable Elastomeric Half-Mask Respirators Compared With Disposable N95 Respirators                                                                                                                      | Personal protective equipment                          |

|                    |                                                                                                                                                                                                                                                              |                                                        |
|--------------------|--------------------------------------------------------------------------------------------------------------------------------------------------------------------------------------------------------------------------------------------------------------|--------------------------------------------------------|
| Li 2020            | COVID-19: Repeatedly Video-Watching vs Combined Video-Watching and Live Demonstration as Training to Healthcare Providers for Donning and Doffing Personal Protective Equipment                                                                              | Psychological and educational                          |
| Zhang 2020         | A comparative study on the time to achieve negative nucleic acid testing and hospital stays between Danoprevir and Lopinavir/Ritonavir in the treatment of patients with COVID-19                                                                            | Not a randomized trial                                 |
| Hua 2020           | Short-term skin reactions following use of N95 respirators and medical masks                                                                                                                                                                                 | Personal protective equipment                          |
| Wen 2020           | [Effect of Xuebijing injection on inflammatory markers and disease outcome of coronavirus disease 2019]                                                                                                                                                      | Traditional Chinese or alternative medicine            |
| CallejasRubio 2020 | Eficacia de los pulsos de corticoides en pacientes con síndrome de liberación de citocinas inducido por infección por SARS-CoV-2                                                                                                                             | Not a randomized trial                                 |
| Duong-Quy 2020     | The use of exhaled nitric oxide and peak expiratory flow to demonstrate improved breathability and antimicrobial properties of novel face mask made with sustainable filter paper and Folium Plectranthii amboinici oil: additional option for mask shortage | Wrong population                                       |
| Bao 2020           | Successful treatment of patients severely ill with COVID-19                                                                                                                                                                                                  | Not a randomized trial                                 |
| Salazar 2020       | Treatment of Coronavirus Disease 2019 (COVID-19) Patients with Convalescent Plasma                                                                                                                                                                           | Not a randomized trial                                 |
| Wu 2020            | Identification and validation of a novel clinical signature to predict the prognosis in confirmed COVID-19 patients                                                                                                                                          | Not a randomized trial                                 |
| Chen 2020          | Antiviral Activity and Safety of Darunavir/Cobicistat for Treatment of COVID-19                                                                                                                                                                              | Not a randomized trial                                 |
| Bretthauer 2020    | Randomized Re-Opening of Training Facilities during the COVID-19 pandemic                                                                                                                                                                                    | Others                                                 |
| Zhao 2020          | Yidu-toxicity blocking lung decoction ameliorates inflammation in severe pneumonia of SARS-CoV-2 patients with Yidu-toxicity blocking lung syndrome by eliminating IL-6 and TNF- $\alpha$                                                                    | Traditional Chinese or alternative medicine            |
| Guan 2020          | Hydrogen/oxygen mixed gas inhalation improves disease severity and dyspnea in patients with Coronavirus disease 2019 in a recent multicenter, open-label clinical trial                                                                                      | Not a randomized trial                                 |
| Liu 2020           | Efficacy of chloroquine versus lopinavir/ritonavir in mild/general COVID-19 infection: a prospective, open-label, multicenter, randomized controlled clinical study                                                                                          | Randomized trial with no results (e.g. trial registry) |
| Boyko 2020         | The first experience of using the drug Angiovit in the complex treatment of the acute stage of COVID-19 infection                                                                                                                                            | Not a randomized trial                                 |
| Wang 2020          | Exploring an Integrative Therapy for Treating COVID-19: A Randomized Controlled Trial                                                                                                                                                                        | Traditional Chinese or alternative medicine            |
| Gokhale 2020       | Tocilizumab improves survival in patients with persistent hypoxia in severe COVID-19 pneumonia                                                                                                                                                               | Not a randomized trial                                 |
| Abolghasemi 2020   | Clinical efficacy of convalescent plasma for treatment of COVID-19 infections: Results of a multicenter clinical study                                                                                                                                       | Not a randomized trial                                 |
| Folegatti 2020     | Safety and immunogenicity of the ChAdOx1 nCoV-19 vaccine against SARS-CoV-2: a preliminary report of a phase 1/2, single-blind, randomised controlled trial                                                                                                  | Vaccine                                                |
| Govind 2020        | Clozapine Treatment and Risk of COVID-19                                                                                                                                                                                                                     | Not a randomized trial                                 |
| Shi Suofang 2020   | Clinical Observation of the Rehabilitation Formula for Banking up Earth to Generate Metal in Treating COVID-19 Patients with Deficiency of Lung and Spleen Syndrome in the Recovery Stage                                                                    | Traditional Chinese or alternative medicine            |
| Ai Xiangying 2020  | Effect of Integrated Traditional Chinese and Western Medicine on T Lymphocyte Subsets of Patients with Normal Type of COVID-19                                                                                                                               | Traditional Chinese or alternative medicine            |
| Tan Shigang 2020   | Effect of Intravenous Lidocaine on Central Venous Puncture Analgesia in Cases of Suspected or Confirmed COVID-19                                                                                                                                             | Others                                                 |
| Yan 2020           | Large-scale prospective clinical study on prophylactic intervention of COVID-19 in community population using Huoxiang Zhengqi Oral Liquid and Jinhao Jiere Granules. [Chinese]                                                                              | Traditional Chinese or alternative medicine            |
| Xiong 2020         | Efficacy of herbal medicine (Xuanfei Baidu decoction) combined with conventional drug in treating COVID-19: A pilot randomized clinical trial                                                                                                                | Not a randomized trial                                 |
| Pang 2020          | Efficacy and tolerability of bevacizumab in patients with severe Covid -19                                                                                                                                                                                   | Not a randomized trial                                 |

|                    |                                                                                                                                                                                                             |                                                        |
|--------------------|-------------------------------------------------------------------------------------------------------------------------------------------------------------------------------------------------------------|--------------------------------------------------------|
| kamran 2020        | Clearing the fog: Is HCQ effective in reducing COVID-19 progression: A randomized controlled trial (preprint)                                                                                               | Not a randomized trial                                 |
| Suppan 2020        | Effect of an E-Learning Module on Personal Protective Equipment Proficiency by Prehospital Personnel: Web-Based, Randomized Controlled Trial                                                                | Psychological and educational                          |
| Hong 2020          | Early Hydroxychloroquine Administration for Rapid Severe Acute Respiratory Syndrome Coronavirus 2 Eradication                                                                                               | Not a randomized trial                                 |
| Keech 2020         | First-in-Human Trial of a SARS CoV 2 Recombinant Spike Protein Nanoparticle Vaccine (preprint)                                                                                                              | Vaccine                                                |
| Yu 2020            | Effects of Lianhua Qingwen Granules Plus Arbidol on Treatment of Mild Corona Virus Disease-19. [Chinese]                                                                                                    | Traditional Chinese or alternative medicine            |
| Zhang 2020         | Immunogenicity and Safety of a SARS-CoV-2 Inactivated Vaccine in Healthy Adults Aged 18-59 years: Report of the Randomized, Double-blind, and Placebo-controlled Phase 2 Clinical Trial (preprint)          | Vaccine                                                |
| Ibrahim 2020       | Factors Associated with Good Patient Outcomes Following Convalescent Plasma in COVID-19: A Prospective Phase 2 Clinical Trial (preprint)                                                                    | Removed from preprint server                           |
| Xiao 2020          | Efficacy of Huoxiang Zhengqi dropping pills and Lianhua Qingwen granules in treatment of COVID-19: A randomized controlled trial                                                                            | Traditional Chinese or alternative medicine            |
| Mulligan 2020      | Phase 1/2 study of COVID-19 RNA vaccine BNT162b1 in adults                                                                                                                                                  | Vaccine                                                |
| Xia 2020           | Effect of an Inactivated Vaccine Against SARS-CoV-2 on Safety and Immunogenicity Outcomes: Interim Analysis of 2 Randomized Clinical Trials                                                                 | Vaccine                                                |
| Folegatti 2020     | Erratum: Department of Error (The Lancet (2020) 396(10249) (467,Äi478), (S0140673620316044), (10.1016/S0140-6736(20)31604-4))                                                                               | Vaccine                                                |
| Francell 2020      | The Effects of Electronic Alert Letters in the Time of COVID-19 (preprint)                                                                                                                                  | Wrong population                                       |
| Eslami 2020        | The impact of sofosbuvir/daclatasvir or ribavirin in patients with severe COVID-19                                                                                                                          | Not a randomized trial                                 |
| Qamar 2020         | Protective Effects of CVD and DM Medications in SARS-CoV-2 Infection                                                                                                                                        | Not a randomized trial                                 |
| Sinha 2020         | Interleukin-6 Receptor Inhibitor Therapy Is Associated with Improved Outcomes in Patients with Severe COVID-19 Disease (preprint)                                                                           | Not a randomized trial                                 |
| Walsh 2020         | RNA-Based COVID-19 Vaccine BNT162b2 Selected for a Pivotal Efficacy Study (preprint)                                                                                                                        | Vaccine                                                |
| Sheng 2020         | Canakinumab to reduce deterioration of cardiac and respiratory function in SARS-CoV-2 associated myocardial injury with heightened inflammation (canakinumab in Covid-19 cardiac injury: The three C study) | Randomized trial with no results (e.g. trial registry) |
| Zhdanov 2020       | Clinical efficacy and safety of nebulized prostacyclin in patients with sARs-CoV-2 (prospective comparative study). [Russian]                                                                               | Not a randomized trial                                 |
| Keech 2020         | Phase 1-2 Trial of a SARS-CoV-2 Recombinant Spike Protein Nanoparticle Vaccine                                                                                                                              | Vaccine                                                |
| López Zúñiga 2020  | High-Dose Corticosteroid Pulse Therapy~+Increases the Survival Rate in COVID-19 Patients at Risk of Cytokine Storm (preprint)                                                                               | Not a randomized trial                                 |
| Mohamed 2020       | EARLY VIRAL CLEARANCE AMONG COVID-19 PATIENTS WHEN GARGLING WITH POVIDONE-IODINE AND ESSENTIAL OILS: A PILOT CLINICAL TRIAL (preprint)                                                                      | Others                                                 |
| Duan Can 2020      | Clinical Observation of Jinhua Qinggan Granule in Treating Pneumonia Infected by Novel Coronavirus                                                                                                          | Traditional Chinese or alternative medicine            |
| Hu Fen 2020        | Multi-center clinical observation of honeysuckle oral liquid combined with western medicine in the treatment of common type of COVID-19                                                                     | Traditional Chinese or alternative medicine            |
| Madabhushi 2020    | Time to adapt in the pandemic era: a prospective randomized non -inferiority study comparing time to intubate with and without the barrier box                                                              | Personal protective equipment                          |
| Guan 2020          | Erratum to hydrogen/oxygen mixed gas inhalation improves disease severity and dyspnea in patients with Coronavirus disease 2019 in a recent multicenter, open-label clinical trial                          | Not a randomized trial                                 |
| Rasmussen 2020     | Pulmonary administration of remdesivir in the treatment of COVID-19                                                                                                                                         | Not a randomized trial                                 |
| Hacibekiro_lu 2020 | Efficacy of convalescent plasma according to blood groups in COVID-19 patients                                                                                                                              | Not a randomized trial                                 |
| Li 2020            | Regarding ,ÄúRuxolitinib in treatment of severe coronavirus disease 2019 (COVID-19): A~+multicenter, single-blind, randomized controlled trial,Äú                                                           | Not a randomized trial                                 |

|                       |                                                                                                                                                                                                                                                                 |                                                        |
|-----------------------|-----------------------------------------------------------------------------------------------------------------------------------------------------------------------------------------------------------------------------------------------------------------|--------------------------------------------------------|
| Seneviratne 2020      | Efficacy of commercial mouth-rinses on SARS-CoV-2 viral load in saliva: Randomized Control Trial in Singapore (preprint)                                                                                                                                        | Others                                                 |
| Sadoff 2020           | Safety and immunogenicity of the Ad26.COV2.S COVID-19 vaccine candidate: interim results of a phase 1/2a, double-blind, randomized, placebo-controlled trial (preprint)                                                                                         | Vaccine                                                |
| Chen 2020             | The efficacy and safety of traditional Chinese medicines, modified Radix Fici Simplicissimae, combined with Western medicines amongst patients infected with the 2019 novel coronavirus (SARS-CoV-2) in tropical tourist area, China                            | Traditional Chinese or alternative medicine            |
| Ayerdi 2020           | Preventive efficacy of tenofovir/emtricitabine against SARS-CoV-2 among PREP users                                                                                                                                                                              | Not a randomized trial                                 |
| Gergi 2020            | Thrombo-inflammation response to Tocilizumab in COVID-19                                                                                                                                                                                                        | Not a randomized trial                                 |
| Khan 2020             | Ivermectin treatment may improve the prognosis of patients with COVID-19                                                                                                                                                                                        | Not a randomized trial                                 |
| Center 2020           | Pilot Randomized Controlled Trial: Fluoxetine to Reduce Hospitalization From COVID-19 Infection (FloR COVID-19)                                                                                                                                                 | Randomized trial with no results (e.g. trial registry) |
| Anderson 2020         | Safety and Immunogenicity of SARS-CoV-2 mRNA-1273 Vaccine in Older Adults                                                                                                                                                                                       | Vaccine                                                |
| Myasnikov 2020        | Efficacy of Interferon Gamma in the Prevention of SARS-CoV-2 Infection (COVID-19): Results of a Prospective Controlled Trial                                                                                                                                    | Not a randomized trial                                 |
| Takayama 2020         | A multi-center, randomized controlled trial by the Integrative Management in Japan for Epidemic Disease (IMJEDI study-RCT) on the use of Kampo medicine, kakkonto with shosaikotokakikyosekko, in mild-to-moderate COVID-19 patients for symptomatic relief and | Randomized trial with no results (e.g. trial registry) |
| Pu 2020               | An in-depth investigation of the safety and immunogenicity of an inactivated SARS-CoV-2 vaccine (preprint)                                                                                                                                                      | Vaccine                                                |
| Fong 2020             | Impact of aerosol box on intubation during COVID-19: a simulation study of normal and difficult airways                                                                                                                                                         | Personal protective equipment                          |
| Li 2020               | Convalescent Plasma Treatment in Severe and Life-Threatening COVID-19: A Randomized Controlled Clinical Trial                                                                                                                                                   | Randomized trial with no results (e.g. trial registry) |
| Selman 2020           | Results of a Chilean Nation-Wide Network of Blood Banks for Convalescent Plasma Collection for Pandemic SARS-CoV-2 Treatment                                                                                                                                    | Not a randomized trial                                 |
| Cabanov 2020          | Treatment with tocilizumab does not inhibit induction of anti-COVID-19 antibodies in patients with severe SARS-CoV-2 infection                                                                                                                                  | Not a randomized trial                                 |
| Han 2020              | RUXCOVID: A phase 3, randomized, placebo-controlled study evaluating the efficacy and safety of ruxolitinib in patients with COVID-19-associated cytokine storm                                                                                                 | Randomized trial with no results (e.g. trial registry) |
| Marshall 2020         | A phase II trial to promote recovery from COVID-19 with endocrine therapy                                                                                                                                                                                       | Randomized trial with no results (e.g. trial registry) |
| Strohbehn 2020        | COVIDOSE: Low-dose tocilizumab in the treatment of COVID-19 pneumonitis                                                                                                                                                                                         | Randomized trial with no results (e.g. trial registry) |
| Villa 2020            | Blood purification therapy with a hemodiafilter featuring enhanced adsorptive properties for cytokine removal in patients presenting COVID-19: a pilot study                                                                                                    | Not a randomized trial                                 |
| Wu Haiyan 2020        | Effect of emotional care based on traditional Chinese medicine combining respiratory muscle training on depression and anxiety among patients with COVID-19                                                                                                     | Traditional Chinese or alternative medicine            |
| Zhou 2020             | Clinical study on the treatment of patients with novel coronavirus pneumonia and asymptomatic infection with integrated traditional Chinese and western medicine                                                                                                | Traditional Chinese or alternative medicine            |
| Zhu Xiaoqing 2020     | Study on the application value of psychological nursing in pregnant women suspected of new coronavirus pneumonia                                                                                                                                                | Psychological and educational                          |
| Ai 2020               | Therapeutic effect of integrated traditional Chinese and western medicine on COVID-19 in Guangzhou                                                                                                                                                              | Traditional Chinese or alternative medicine            |
| Xia 2020              | Safety and immunogenicity of an inactivated SARS-CoV-2 vaccine, BBIBP-CorV: a randomised, double-blind, placebo-controlled, phase 1/2 trial                                                                                                                     | Vaccine                                                |
| Walsh 2020            | Safety and Immunogenicity of Two RNA-Based Covid-19 Vaccine Candidates.                                                                                                                                                                                         | Vaccine                                                |
| Fragoso-Saavedra 2020 | A parallel-group, multicenter randomized, double-blinded, placebo-controlled, phase 2/3, clinical trial to test the efficacy of pyridostigmine bromide at low doses to reduce mortality or invasive mechanical ventilation in adults with severe SARS-CoV-2 inf | Randomized trial with no results (e.g. trial registry) |

|                         |                                                                                                                                                                                                                                           |                                                        |
|-------------------------|-------------------------------------------------------------------------------------------------------------------------------------------------------------------------------------------------------------------------------------------|--------------------------------------------------------|
| Wanjarkhedkar 2020      | A prospective clinical study of an Ayurveda regimen in COVID 19 patients                                                                                                                                                                  | Traditional Chinese or alternative medicine            |
| Yang 2020               | Clinical Characteristics and Outcomes of COVID-19 Patients Receiving Compassionate Use Leronlimab                                                                                                                                         | Not a randomized trial                                 |
| Singh 2020              | In adults exposed to COVID-19, hydroxychloroquine did not reduce confirmed or probable COVID-19; trial stopped for futility                                                                                                               | Not a randomized trial                                 |
| BelenguerMuncharaz 2020 | Effectiveness of non-invasive ventilation in intensive care unit admitted patients due to SARS-CoV-2 pneumonia                                                                                                                            | Not a randomized trial                                 |
| Lanthier 2020           | [In patients hospitalized for COVID-19, does dexamethasone reduce 28-days mortality compared to standard treatment?]                                                                                                                      | Not a randomized trial                                 |
| Kintscher 2020          | Plasma Angiotensin Peptide Profiling and ACE (Angiotensin-Converting Enzyme)-2 Activity in COVID-19 Patients Treated With Pharmacological Blockers of the Renin-Angiotensin System                                                        | Not a randomized trial                                 |
| Sivapalan 2020          | Proactive prophylaxis with azithromycin and hydroxychloroquine in hospitalized patients with COVID-19 (ProPAC-COVID): a statistical analysis plan                                                                                         | Randomized trial with no results (e.g. trial registry) |
| Hashim 2020             | Controlled randomized clinical trial on using Ivermectin with Doxycycline for treating COVID-19 patients in Baghdad, Iraq                                                                                                                 | Not a randomized trial                                 |
| Petrak 2020             | Early Tocilizumab Dosing is Associated with Improved Survival In Critically Ill Patients Infected With Sars-CoV-2                                                                                                                         | Not a randomized trial                                 |
| Chang 2020              | Safety and Efficacy of Bronchoscopy in Critically Ill Patients with Coronavirus Disease 2019                                                                                                                                              | Not a randomized trial                                 |
| Ikonomidis 2020         | Tocilizumab improves oxidative stress and endothelial glycocalyx: a mechanism that may explain the effects of biological treatment on COVID-19. (Special Issue: COVID-19 and treatments: particular emphasis on potential toxic effects.) | Wrong population                                       |
| Garcia-Fernandez 2020   | Usefulness and safety of self-electrocardiographic monitoring during treatment with hydroxychloroquine and azithromycin in COVID-19 patients                                                                                              | Not a randomized trial                                 |
| Wu 2020                 | Phase 1 trial for treatment of COVID-19 patients with pulmonary fibrosis using hESC-IMRCs                                                                                                                                                 | Not a randomized trial                                 |
| Araimo 2020             | Ozone as Adjuvant Support in the Treatment of COVID-19: A Preliminary Report of Probiozoid Trial                                                                                                                                          | Oxygen delivery                                        |
| Masiv° 2020             | Lack of detrimental effect of corticosteroids on antibody responses to SARS-CoV-2 and viral clearance in patients hospitalized with COVID-19                                                                                              | Not a randomized trial                                 |
| Shaw 2020               | Wearing of Cloth or Disposable Surgical Face Masks has no Effect on Vigorous Exercise Performance in Healthy Individuals                                                                                                                  | Personal protective equipment                          |
| Spoorthi 2020           | Utility of Ivermectin and Doxycycline combination for the treatment of SARS-CoV-2                                                                                                                                                         | Not a randomized trial                                 |
| Ward 2020               | Phase 1 trial of a Candidate Recombinant Virus-Like Particle Vaccine for Covid-19 Disease Produced in Plants                                                                                                                              | Vaccine                                                |
| Yan 2020                | Effects and Safety of Herbal Medicines among Community-dwelling Residents during COVID-19 Pandemic: A Large Prospective, Randomized Controlled Trial (RCT)                                                                                | Traditional Chinese or alternative medicine            |
| Che 2020                | Randomized, double-blinded and placebo-controlled phase II trial of an inactivated SARS-CoV-2 vaccine in healthy adults                                                                                                                   | Vaccine                                                |
| Dhibar 2020             | Post-exposure prophylaxis with hydroxychloroquine for the prevention of COVID-19, a myth or a reality? The PEP-CQ Study.                                                                                                                  | Not a randomized trial                                 |
| Strohbehn 2020          | COVIDOSE: A phase 2 clinical trial of low-dose tocilizumab in the treatment of non-critical COVID-19 pneumonia.                                                                                                                           | Not a randomized trial                                 |
| Bundgaard 2020          | Effectiveness of Adding a Mask Recommendation to Other Public Health Measures to Prevent SARS-CoV-2 Infection in Danish Mask Wearers : A Randomized Controlled Trial.                                                                     | Personal protective equipment                          |
| Ramasamy 2020           | Safety and immunogenicity of ChAdOx1 nCoV-19 vaccine administered in a prime-boost regimen in young and old adults (COV002): a single-blind, randomised, controlled, phase 2/3 trial                                                      | Vaccine                                                |
| Shogenova 2020          | Effect of thermal helium-oxygen mixture on viral load in COVID-19                                                                                                                                                                         | Oxygen delivery                                        |
| Zhang 2020              | Safety, tolerability, and immunogenicity of an inactivated SARS-CoV-2 vaccine in healthy adults aged 18-59 years: a randomised, double-blind, placebo-controlled, phase 1/2 clinical trial.                                               | Vaccine                                                |

|                           |                                                                                                                                                                                                                                                                 |                                                        |
|---------------------------|-----------------------------------------------------------------------------------------------------------------------------------------------------------------------------------------------------------------------------------------------------------------|--------------------------------------------------------|
| NoorAzhar 2020            | COVID-19 aerosol box as protection from droplet and aerosol contaminations in healthcare workers performing airway intubation: a randomised cross-over simulation study                                                                                         | Personal protective equipment                          |
| Bautin 2020               | Inhalation surfactant therapy in the integrated treatment of severe COVID-19 pneumonia                                                                                                                                                                          | Not a randomized trial                                 |
| Younie 2020               | Improving young children's handwashing behaviour and understanding of germs: The impact of A Germ's Journey educational resources in schools and public spaces.                                                                                                 | Psychological and educational                          |
| Erdem 2020                | Treatment of SARS-cov-2 pneumonia with favipiravir: Early results from the Ege University cohort, Turkey.                                                                                                                                                       | Not a randomized trial                                 |
| Zhou 2020                 | Low-dose corticosteroid combined with immunoglobulin reverses deterioration in severe cases with COVID-19.                                                                                                                                                      | Not a randomized trial                                 |
| Hong 2020                 | Celebrex Adjuvant Therapy on Coronavirus Disease 2019: An Experimental Study                                                                                                                                                                                    | Not a randomized trial                                 |
| Piralla 2020              | Residual SARS-CoV-2 RNA in nasal swabs of convalescent COVID-19 patients: Is prolonged quarantine always justified?                                                                                                                                             | Not a randomized trial                                 |
| Liu 2020                  | The dual role of anti-viral therapy in the treatment of Coronavirus disease 2019.                                                                                                                                                                               | Not a randomized trial                                 |
| Alamdari 2020             | Application of methylene blue -vitamin C - N-acetyl cysteine for treatment of critically ill COVID-19 patients, report of a phase-I clinical trial. (Special Issue: Therapeutic targets and pharmacological treatment of COVID-19.)                             | Not a randomized trial                                 |
| Potere 2020               | Low-dose subcutaneous tocilizumab to prevent disease progression in patients with moderate COVID-19 pneumonia and hyperinflammation. (Special Issue: Coronavirus (COVID-19) collection.)                                                                        | Not a randomized trial                                 |
| Chen 2020                 | Clinical efficacy and safety of favipiravir in the treatment of COVID-19 patients                                                                                                                                                                               | Not a randomized trial                                 |
| Gold 2020                 | Efficacy of m-Health for the detection of adverse events following immunization - The stimulated telephone assisted rapid safety surveillance (STARSS) randomised control trial                                                                                 | Others                                                 |
| Luo 2020                  | Application of chest low-dose CT screening of Corona Virus Disease 2019 with a third-generation dual-source scanner                                                                                                                                             | Diagnostic imaging                                     |
| Li 2020                   | Evaluation of low-dose CT protocol of novel coronavirus pneumonia based on infection prevention and control                                                                                                                                                     | Diagnostic imaging                                     |
| Rao 2020                  | AYUSH medicine as add-on therapy for mild category COVID-19; an open label randomised, controlled clinical trial.                                                                                                                                               | Traditional Chinese or alternative medicine            |
| De Marchi 2020            | Effects of photobiomodulation therapy combined with static magnetic field (PBMT-sMF) in patients with severe COVID-19 requiring intubation: a pragmatic randomized placebo-controlled trial                                                                     | Exercise/rehabilitation                                |
| Polack 2020               | Safety and Efficacy of the BNT162b2 mRNA Covid-19 Vaccine                                                                                                                                                                                                       | Vaccine                                                |
| Voysey 2020               | Safety and efficacy of the ChAdOx1 nCoV-19 vaccine (AZD1222) against SARS-CoV-2: an interim analysis of four randomised controlled trials in Brazil, South Africa, and the UK                                                                                   | Vaccine                                                |
| Devos 2020                | Correction to: A randomized, multicentre, open-label phase II proof-of-concept trial investigating the clinical efficacy and safety of the addition of convalescent plasma to the standard of care in patients hospitalized with COVID-19: the Donated Antibodi | Randomized trial with no results (e.g. trial registry) |
| RachesElla 2020           | Safety and immunogenicity clinical trial of an inactivated SARS-CoV-2 vaccine, BBV152 (a phase 2, double-blind, randomised controlled trial) and the persistence of immune responses from a phase 1 follow-up report                                            | Vaccine                                                |
| ShilongYang 2020          | Safety and immunogenicity of a recombinant tandem-repeat dimeric RBD protein vaccine against COVID-19 in adults: pooled analysis of two randomized, double-blind, placebo-controlled, phase 1 and 2 trials                                                      | Vaccine                                                |
| Folegatti 2020            | Safety and immunogenicity of the ChAdOx1 nCoV-19 vaccine against SARS-CoV-2: a preliminary report of a phase 1/2, single-blind, randomised controlled trial.                                                                                                    | Vaccine                                                |
| Shah 2020                 | Safety and efficacy of ozone therapy in mild to moderate COVID-19 patients: A Phase 1/11 Randomized control Trial (SEOT study)                                                                                                                                  | Oxygen delivery                                        |
| Moniuszko-Malinowska 2021 | Convalescent Plasma Transfusion for the Treatment of COVID-19, Experience from Poland: A Multicenter Study                                                                                                                                                      | Not a randomized trial                                 |
| Panigada 2020             | Effect of heparin on viscoelastic parameters of COVID-19 critically ill patients. A Viscoelastic Coagulation Monitor (VCM) analysis                                                                                                                             | Not a randomized trial                                 |

|                 |                                                                                                                                                                                                |                                                        |
|-----------------|------------------------------------------------------------------------------------------------------------------------------------------------------------------------------------------------|--------------------------------------------------------|
| Alsan 2020      | Comparison of Knowledge and Information-Seeking Behavior After General COVID-19 Public Health Messages and Messages Tailored for Black and Latinx Communities : A Randomized Controlled Trial. | Wrong population                                       |
| Baden 2020      | Efficacy and Safety of the mRNA-1273 SARS-CoV-2 Vaccine.                                                                                                                                       | Vaccine                                                |
| Mugheddu 2020   | Safety of secukinumab treatment in COVID-19 affected psoriatic patients.                                                                                                                       | Not a randomized trial                                 |
| Al-Sadawi 2020  | Hydroxychloroquine and Azithromycin Usage in African American Patients With Coronavirus Disease 2019 (COVID-19) and Their Effects on QT Interval                                               | Not a randomized trial                                 |
| Feng 2020       | Differentiation between COVID-19 and bacterial pneumonia using radiomics of chest computed tomography and clinical features                                                                    | Not a randomized trial                                 |
| Namazi 2020     | Ellagic acid can possibly be an adjuvant treatment for COVID-19                                                                                                                                | Not a randomized trial                                 |
| Sardari 2021    | Therapeutic effect of thyme (Thymus vulgaris) essential oil on patients with covid19: A randomized clinical trial                                                                              | Traditional Chinese or alternative medicine            |
| Carbillon 2021  | Hydroxychloroquine at usual doses as an option for coronavirus disease 2019 treatment.                                                                                                         | Not a randomized trial                                 |
| Janapala 2020   | Novaferon, treatment in COVID-19 patients.                                                                                                                                                     | Not a randomized trial                                 |
| Kollias 2020    | Anticoagulation therapy in COVID-19: Is there a dose-dependent benefit?                                                                                                                        | Not a randomized trial                                 |
| Flisiak 2020    | Remdesivir-based therapy improved recovery of patients with COVID-19 in the SARSTer multicentre, real-world study.                                                                             | Not a randomized trial                                 |
| Gautret 2021    | Safety profile of hydroxychloroquine and azithromycin combined treatment in COVID-19 patients                                                                                                  | Not a randomized trial                                 |
| Gautret 2021    | Clinical efficacy and safety profile of hydroxychloroquine and azithromycin against COVID-19                                                                                                   | Not a randomized trial                                 |
| Moisset 2021    | Nasopharyngeal swab-induced pain for SARS-CoV-2 screening: a randomised controlled trial of conventional and self-swabbing.                                                                    | Wrong population                                       |
| Dillon 2020     | A real-world data study of coronavirus-2019 disease severity in patients with multiple sclerosis treated with ocrelizumab                                                                      | Not a randomized trial                                 |
| Karan 2020      | Clinical outcomes in patients with COVID-19 infection during phase IV studies of cladribine tablets for treatment of multiple sclerosis                                                        | Not a randomized trial                                 |
| Papamanoli 2020 | 76. Effect of Early Administration of Systemic Corticosteroids on Outcomes in Patients with COVID-19 Pneumonia                                                                                 | Not a randomized trial                                 |
| Reig 2020       | 560. Repurposing Eravacycline for the Treatment of SARS-CoV-2 Infections                                                                                                                       | Not a randomized trial                                 |
| Poulakou 2021   | Beneficial Effects of Intermediate Dosage of Anticoagulation Treatment on the Prognosis of Hospitalized COVID-19 Patients: The ETHRA Study.                                                    | Not a randomized trial                                 |
| Raj 2020        | Effect of a novel ayurvedic preparation, Raj Nirvan Bati (rnb), on symptomatic patients of covid-19                                                                                            | Traditional Chinese or alternative medicine            |
| Liu 2020        | [Effect of moxibustion on clinical symptoms, peripheral inflammatory indexes and T lymphocyte subsets in COVID-19 patients]                                                                    | Traditional Chinese or alternative medicine            |
| LeBon 2021      | Efficacy and safety of oral corticosteroids and olfactory training in the management of COVID-19-related loss of smell.                                                                        | Not a randomized trial                                 |
| Folegatti 2020  | Safety and immunogenicity of the ChAdOx1 nCoV-19 vaccine against SARS-CoV-2: a preliminary report of a phase 1/2, single-blind, randomised controlled trial (vol 396, pg 467, 2020)            | Vaccine                                                |
| Al Shehry 2021  | Safety and Efficacy of Convalescent Plasma for Severe COVID-19: Interim Report of a Multicenter Phase II Study from Saudi Arabia                                                               | Not a randomized trial                                 |
| Sadoff 2021     | Interim Results of a Phase 1-2a Trial of Ad26.COV2.S Covid-19 Vaccine.                                                                                                                         | Vaccine                                                |
| Singh 2021      | The outcome of fluticasone nasal spray on anosmia and triamcinolone oral paste in taste dysgeusia in COVID-19 patients                                                                         | Not a randomized trial                                 |
| Vanassche 2020  | A randomized, open-label, adaptive, proof-of-concept clinical trial of modulation of host thromboinflammatory response in patients with COVID-19: the DAWn-Antico study (vol 21, 1005, 2020)   | Randomized trial with no results (e.g. trial registry) |
| Katia 2021      | Efficacy of canakinumab in mild or severe COVID-19 pneumonia                                                                                                                                   | Not a randomized trial                                 |

|                      |                                                                                                                                                                                                                                                          |                                             |
|----------------------|----------------------------------------------------------------------------------------------------------------------------------------------------------------------------------------------------------------------------------------------------------|---------------------------------------------|
| Chitra 2021          | An Open Clinical Evaluation Of Selected Siddha Regimen In Expediting The Management Of Covid-19 ,ÄiA Randomized Controlled Study                                                                                                                         | Traditional Chinese or alternative medicine |
| JiaLiu 2021          | Chinese medicine (Q-14) in the Treatment of Patients with Coronavirus Disease 2019 (COVID-19): A Single-center, Open label, Randomised Controlled Trial                                                                                                  | Traditional Chinese or alternative medicine |
| Hariri 2021          | Rate control in atrial fibrillation using Landiolol is safe in critically ill Covid-19 patients.                                                                                                                                                         | Not a randomized trial                      |
| Embase 2021          | THERAPEUTIC EFFECT of VITAMIN A on COVID-19 PATIENTS and ITS PROPHYLACTIC EFFECT on CONTACTS                                                                                                                                                             | Not a randomized trial                      |
| ProQuestCentral 2021 | Self-proning in COVID-19 patients on low-flow oxygen therapy. A cluster randomised controlled trial                                                                                                                                                      | Oxygen delivery                             |
| Ella 2021            | Safety and immunogenicity of an inactivated SARS-CoV-2 vaccine, BBV152: a double-blind, randomised, phase 1 trial.                                                                                                                                       | Vaccine                                     |
| Dixon 2020           | The Relevance of Oxytocin & Dynorphin in COVID-19: Towards a Prophylactic Treatment (preprint)                                                                                                                                                           | Not a randomized trial                      |
| Fiol-DeRoque 2021    | Effectiveness of a Mobile Phone-Based Intervention to Reduce Mental Health Problems in Healthcare Workers During the COVID-19 Pandemic: A Randomized Controlled Trial (PsyCovidApp Trial) (preprint)                                                     | Wrong population                            |
| Ball 2021            | Nebulised heparin for patients on ventilation: implications for COVID-19 pneumonia.                                                                                                                                                                      | Not a randomized trial                      |
| Chen 2020            | Corticosteroid Therapy Is Associated With Improved Outcome in Critically Ill Coronavirus Disease 2019 Patients With Hyperinflammatory Phenotype.                                                                                                         | Not a randomized trial                      |
| Singh 2021           | The outcome of fluticasone nasal spray on anosmia and triamcinolone oral paste in dysgeusia in COVID-19 patients.                                                                                                                                        | Not a randomized trial                      |
| Acosta-Ampudia 2021  | COVID-19 convalescent plasma composition and immunological effects in severe patients                                                                                                                                                                    | Not a randomized trial                      |
| Liangjianghuang 2021 | Ultra-short-wave diathermy shortens the course of moderate and severe COVID-19: a randomized controlled trial                                                                                                                                            | Exercise/rehabilitation                     |
| Brüggemann 2021      | TChloroquine for treatment of COVID-19 results in subtherapeutic exposure and prolonged QTc intervals                                                                                                                                                    | Not a randomized trial                      |
| PaulRHunter 2021     | Estimating the effectiveness of the Pfizer COVID-19 BNT162b2 vaccine after a single dose. A reanalysis of a study of &#039;real-world&#039; vaccination outcomes from Israel.                                                                            | Vaccine                                     |
| Luo 2021             | The preventive effect of Xuebijing injection against Cytokine Storm for severe patients with COVID-19: a prospective randomized controlled trial                                                                                                         | Traditional Chinese or alternative medicine |
| Bentur 2021          | Phase 1 Randomized Placebo-Controlled Study in Healthy Adult Volunteers to Evaluate the Safety, Tolerability, and Pharmacokinetics of Orally Inhaled Aerosolized Hydroxychloroquine Sulfate ,Äi A Potential Treatment for COVID-19                       | Wrong population                            |
| Kienbacher 2021      | The use of personal protection equipment does not impair the quality of cardiopulmonary resuscitation: A prospective triple-cross over randomised controlled non-inferiority trial                                                                       | Personal protective equipment               |
| Voysey 2021          | Safety and efficacy of the ChAdOx1 nCoV-19 vaccine (AZD1222) against SARS-CoV-2: an interim analysis of four randomised controlled trials in Brazil, South Africa, and the UK                                                                            | Vaccine                                     |
| Richmond 2021        | Safety and immunogenicity of S-Trimer (SCB-2019), a protein subunit vaccine candidate for COVID-19 in healthy adults: a phase 1, randomised, double-blind, placebo-controlled trial                                                                      | Vaccine                                     |
| Felinska 2021        | Surgical Performance Is Not Negatively Impacted by Wearing a Commercial Full-Face Mask with Ad Hoc 3D-Printed Filter Connection as a Substitute for Personal Protective Equipment during the COVID-19 Pandemic: A Randomized Controlled Cross-Over Trial | Personal protective equipment               |
| Liu 2021             | Arbidol combined with the Chinese medicine Lianhuaqingwen capsule versus arbidol alone in the treatment of COVID-19.                                                                                                                                     | Not a randomized trial                      |
| Emary 2021           | Efficacy of ChAdOx1 nCoV-19~+~(AZD1222)~+~Vaccine Against SARS-CoV-2 VOC~+~202012/01~+~(B.1.1.7) (preprint)                                                                                                                                              | Vaccine                                     |
| Voysey 2021          | Single Dose~+~Administration,~+~And~+~The~+~Influence Of~+~The~+~Timing Of~+~The~+~Booster Dose~+~On Immunogenicity and Efficacy Of~+~ChAdOx1 nCoV-19~+~(AZD1222)~+~Vaccine (preprint)                                                                   | Vaccine                                     |
| Guenezan 2021        | Povidone Iodine Mouthwash, Gargle, and Nasal Spray to Reduce Nasopharyngeal Viral Load in Patients With COVID-19: A Randomized Clinical Trial.                                                                                                           | Others                                      |

|                   |                                                                                                                                                                                                                                                                     |                                                        |
|-------------------|---------------------------------------------------------------------------------------------------------------------------------------------------------------------------------------------------------------------------------------------------------------------|--------------------------------------------------------|
| Logunov 2021      | Safety and efficacy of an rAd26 and rAd5 vector-based heterologous prime-boost COVID-19 vaccine: an interim analysis of a randomised controlled phase 3 trial in Russia.                                                                                            | Vaccine                                                |
| Rais 2021         | A Randomized open label parallel group pilot study to evaluate efficacy of Ayurveda interventions in the management of Asymptomatic and Mild COVID-19 patients-Experiences of a Lucknow based Level 2 hospital of Uttar Pradesh, India                              | Traditional Chinese or alternative medicine            |
| Devpura 2021      | Randomized Placebo-Controlled Pilot Clinical Trial on the Efficacy of Ayurvedic Treatment Regime on COVID-19 Positive Patients                                                                                                                                      | Traditional Chinese or alternative medicine            |
| Wu 2021           | Safety, tolerability, and immunogenicity of an inactivated SARS-CoV-2 vaccine (CoronaVac) in healthy adults aged 60 years and older: a randomised, double-blind, placebo-controlled, phase 1/2 clinical trial                                                       | Vaccine                                                |
| Chappell 2021     | First Report of a Phase 1 Randomised Trial of Molecular Clamp-Stabilised Spike Protein-Based and MF59-Adjuvanted Vaccine for SARS-CoV-2 (preprint)                                                                                                                  | Vaccine                                                |
| Voysey 2021       | Safety and efficacy of the ChAdOx1 nCoV-19 vaccine (AZD1222) against SARS-CoV-2: an interim analysis of four randomised controlled trials in Brazil, South Africa, and the UK (vol 397, pg 99, 2021)                                                                | Vaccine                                                |
| Vowels 2021       | Partner Support and Goal Outcomes during COVID-19: A Mixed Methods Study                                                                                                                                                                                            | Not a randomized trial                                 |
| Wakita 2021       | Comparison of the clinical performance and usefulness of five SARS-CoV-2 antibody tests.                                                                                                                                                                            | Not a randomized trial                                 |
| Alemanno 2021     | COVID-19 cognitive deficits after respiratory assistance in the subacute phase: A COVID-rehabilitation unit experience.                                                                                                                                             | Not a randomized trial                                 |
| Abou-Arab 2021    | Microvascular flow alterations in critically ill COVID-19 patients: A prospective study.                                                                                                                                                                            | Not a randomized trial                                 |
| Chu 2021          | A preliminary report of a randomized controlled phase 2 trial of the safety and immunogenicity of mRNA-1273 SARS-CoV-2 vaccine                                                                                                                                      | Vaccine                                                |
| Li 2020           | The Effect of Cognitive Behavioral Therapy on Depression, Anxiety, and Stress in Patients With COVID-19: A Randomized Controlled Trial                                                                                                                              | Psychological and educational                          |
| Donato 2021       | Clinical and laboratory evaluation of patients with SARS-CoV-2 pneumonia treated with high-titer convalescent plasma.                                                                                                                                               | Not a randomized trial                                 |
| Mammen 2021       | Assessing of the Factors Associated with Mortality Among the Patients of PLACID Trial (A Phase II, Open Label, Randomized Controlled Trial to Assess the Safety and Efficacy of Convalescent Plasma to Limit COVID-19 Associated Complications in Moderate Disease) | Not a randomized trial                                 |
| Srivastava 2021   | A double blinded placebo controlled comparative clinical trial to evaluate the effectiveness of Siddha medicines, Kaba Sura Kudineer (KSK) & Nilavembu Kudineer (NVK) along with standard Allopathy treatment in the management of symptomatic COVID 19 patients    | Randomized trial with no results (e.g. trial registry) |
| Andrani 2020      | Effectiveness of helmet CPAP to reduce intubation and mortality rate in patients with COVID-19                                                                                                                                                                      | Not a randomized trial                                 |
| Aschieri 2020     | Hospital mortality and safety of therapeutic vs. prophylactic doses of low molecular weight heparin in COVID-19 patients                                                                                                                                            | Not a randomized trial                                 |
| Ramasamy 2020     | Safety and immunogenicity of ChAdOx1 nCoV-19 vaccine administered in a prime-boost regimen in young and old adults (COV002): a single-blind, randomised, controlled, phase 2/3 trial (vol 396, pg 1979, 2020)                                                       | Vaccine                                                |
| Voysey 2021       | Single-dose administration and the influence of the timing of the booster dose on immunogenicity and efficacy of ChAdOx1 nCoV-19 (AZD1222) vaccine: a pooled analysis of four randomised trials                                                                     | Vaccine                                                |
| Vergori 2020      | Prophylactic dose of low-molecular-weight heparin (LMWH) might not be sufficient to mitigate the clinical scenario in patients with COVID-19 and severe pneumonia                                                                                                   | Not a randomized trial                                 |
| Gupta 2020        | Determining the usage and efficacy of COVID-19 convalescent plasma harvested at our blood centre                                                                                                                                                                    | Not a randomized trial                                 |
| Terpos 2020       | Rapid Reduction of Anti-Sars-Cov-2 Antibodies in Convalescent Plasma Donors;Results of a Phase 2 Clinical Study                                                                                                                                                     | Not a randomized trial                                 |
| Perez-Jacobo 2020 | Phase I and Preliminary Results of a Phase II Study (TERAPLASCoV2) of Convalescent Plasma in Patients with Severe and Life-Threatening Pneumonia Caused By Sars-Cov-2                                                                                               | Not a randomized trial                                 |
| Dummer 2020       | Clinical Trial to Evaluate an Approved ITP Therapy Targeting Spleen Tyrosine Kinase (SYK) for Prevention and Treatment of COVID-19 Related Complications                                                                                                            | Randomized trial with no results (e.g. trial registry) |

|                             |                                                                                                                                                                                                                                                        |                                                        |
|-----------------------------|--------------------------------------------------------------------------------------------------------------------------------------------------------------------------------------------------------------------------------------------------------|--------------------------------------------------------|
| Chambers 2020               | COVID-19-Associated Coagulopathy: Safety and Efficacy of Prophylactic Anticoagulation Therapy in Hospitalized Adults with COVID-19                                                                                                                     | Randomized trial with no results (e.g. trial registry) |
| Hernandez-Cedeno 2021       | CIGB-258, a peptide derived from human heat-shock protein 60, decreases hyperinflammation in COVID-19 patients.                                                                                                                                        | Not a randomized trial                                 |
| Chavarria 2021              | Antioxidants and pentoxifylline as coadjuvant measures to standard therapy to improve prognosis of patients with pneumonia by COVID-19                                                                                                                 | Not a randomized trial                                 |
| ArturoChang-Monteagudo 2021 | A single dose of SARS CoV 2 FINLAY FR 1A dimeric RBD recombinant vaccine enhances neutralization response in COVID19 convalescents, with excellent safety profile. A preliminary report of an open-label phase 1 clinical trial                        | Vaccine                                                |
| VivekShinde 2021            | Preliminary Efficacy of the NVX-CoV2373 Covid-19 Vaccine Against the B.1.351 Variant                                                                                                                                                                   | Vaccine                                                |
| Ozlu 2021                   | The effects of progressive muscle relaxation exercises on the anxiety and sleep quality of patients with COVID-19: A randomized controlled study                                                                                                       | Exercise/rehabilitation                                |
| Gyselinck 2021              | Correction to: Direct antivirals working against the novel coronavirus: azithromycin (DAWN-AZITHRO), a randomized, multicenter, open-label, adaptive, proof-of-concept clinical trial of new antivirals working against SARS-CoV-2-azithromycin trial. | Not a randomized trial                                 |
| Ella 2021                   | Safety and immunogenicity of an inactivated SARS-CoV-2 vaccine, BBV152: interim results from a double-blind, randomised, multicentre, phase 2 trial, and 3-month follow-up of a double-blind, randomised phase 1 trial                                 | Vaccine                                                |
| DiTano 2021                 | [The AFFIRM-AHF trial: results, impact of COVID-19 and clinical implications].                                                                                                                                                                         | Not a randomized trial                                 |
| Logunov 2021                | Safety and efficacy of an rAd26 and rAd5 vector-based heterologous prime-boost COVID-19 vaccine: an interim analysis of a randomised controlled phase 3 trial in Russia (vol 397, pg 671, 2021)                                                        | Vaccine                                                |
| Aleem 2021                  | Hepatic manifestations of COVID-19 and effect of remdesivir on liver function in patients with COVID-19 illness                                                                                                                                        | Not a randomized trial                                 |
| Jiang 2020                  | A combination regimen by lopinave/litonawe, emtricitabine and tenofovir alafenamide fumarate for treatment of novel coronavirus pneumonia (TARCoV)                                                                                                     | Not a randomized trial                                 |
| Stephenson 2021             | Immunogenicity of the Ad26.COV2.S Vaccine for COVID-19                                                                                                                                                                                                 | Vaccine                                                |
| Lin 2021                    | Mycobacterium vaccae Nebulization in the Treatment of COVID-19: A Randomized, Double-Blind, Placebo-Controlled Trial                                                                                                                                   | Others                                                 |
| Li Xingang 2020             | Clinical study of glucocorticoids in the treatment of severe patients with new coronavirus pneumonia                                                                                                                                                   | Not a randomized trial                                 |
| Xue Ping 2020               | Observation on the application of small and medium-dose glucocorticoids in the treatment of elderly patients with common new type coronavirus pneumonia                                                                                                | Not a randomized trial                                 |
| Latorre 2021                | 4CPS-338, Use and efficacy of tocilizumab in patients with severe COVID-19 pneumonia                                                                                                                                                                   | Not a randomized trial                                 |
| Kharat 2021                 | Self-proning in COVID-19 patients on low-flow oxygen therapy: a cluster randomised controlled trial                                                                                                                                                    | Oxygen delivery                                        |
| Awasthi 2021                | Plasma IL-6 levels following corticosteroid therapy as an indicator of ICU length of stay in critically ill COVID-19 patients                                                                                                                          | Not a randomized trial                                 |
| Madhi 2021                  | Efficacy of the ChAdOx1 nCoV-19 Covid-19 Vaccine against the B.1.351 Variant                                                                                                                                                                           | Vaccine                                                |
| Cantarelli 2021             | SPSQ-178, Hepatotoxicity associated with acute tocilizumab treatment in patients with SARS-CoV-2 infection                                                                                                                                             | Not a randomized trial                                 |
| Dutt 2021                   | A randomized and comparative study to assess safety and efficacy of supplemental treatment of a herbal formulation - Aayudh Advance comprising essential oils in patients with corona virus 2019 (COVID-19)                                            | Traditional Chinese or alternative medicine            |
| Silveira 2021               | Efficacy of Brazilian Green Propolis (EPP-AF-Æ) as an adjunct treatment for hospitalized COVID-19 patients: a randomized, controlled clinical trial                                                                                                    | Nutrition and supplements                              |
| Wei 2020                    | Early antiviral therapy of abidol combined with lopinavir/ritonavir and recombinant interferon $\alpha$ -2b for patients with COVID-19 in Zhejiang: A multicenter prospective study                                                                    | Not a randomized trial                                 |
| Bradley 2021                | Antibody Responses after a Single Dose of SARS-CoV-2 mRNA Vaccine.                                                                                                                                                                                     | Not a randomized trial                                 |
| Benenson 2021               | BNT162b2 mRNA Covid-19 Vaccine Effectiveness among Health Care Workers.                                                                                                                                                                                | Not a randomized trial                                 |

|                   |                                                                                                                                                                                                                               |                                                        |
|-------------------|-------------------------------------------------------------------------------------------------------------------------------------------------------------------------------------------------------------------------------|--------------------------------------------------------|
| HannaHuang 2021   | Use of Chlorhexidine to Eradicate Oropharyngeal SARS-CoV-2 in COVID-19 Patients.                                                                                                                                              | Others                                                 |
| Grieco 2021       | Effect of Helmet Noninvasive Ventilation vs High-Flow Nasal Oxygen on Days Free of Respiratory Support in Patients With COVID-19 and Moderate to Severe Hypoxemic Respiratory Failure: The HENIVOT Randomized Clinical Trial. | Oxygen delivery                                        |
| Lin 2021          | Decreased mortality in acute respiratory distress syndrome patients treated with corticosteroids: an updated meta-analysis of randomized clinical trials with trial sequential analysis                                       | Not a randomized trial                                 |
| Yang 2021         | Safety and immunogenicity of a recombinant tandem-repeat dimeric RBD-based protein subunit vaccine (ZF2001) against COVID-19 in adults: two randomised, double-blind, placebo-controlled, phase 1 and 2 trials                | Vaccine                                                |
| Meza 2021         | Angiotensin-converting-enzyme inhibitors and angiotensin II receptor blockers for COVID-19: A living systematic review of randomized clinical trials                                                                          | Not a randomized trial                                 |
| Altuntas 2021     | Convalescent plasma therapy in patients with COVID-19                                                                                                                                                                         | Not a randomized trial                                 |
| Kow 2021          | The association between the use of ivermectin and mortality in patients with COVID-19: a meta-analysis.                                                                                                                       | Not a randomized trial                                 |
| Goldberg 2021     | A real-life setting evaluation of the effect of remdesivir on viral load in COVID-19 patients admitted to a large tertiary centre in Israel.                                                                                  | Not a randomized trial                                 |
| Majewski 2021     | Chloroquine and hydroxychloroquine - safety profile of potential COVID-19 drugs from the rheumatologist's perspective.                                                                                                        | Not a randomized trial                                 |
| SusanMBueno 2021  | Interim Report: Safety And Immunogenicity Of An Inactivated Vaccine Against Sars-Cov-2 In Healthy Chilean Adults In A Phase 3 Clinical Trial                                                                                  | Vaccine                                                |
| Emary 2021        | Efficacy of ChAdOx1 nCoV-19 (AZD1222) vaccine against SARS-CoV-2 variant of concern 202012/01 (B.1.1.7): an exploratory analysis of a randomised controlled trial                                                             | Vaccine                                                |
| Chowdhury 2021    | A Comparative Study on Ivermectin-Doxycycline and Hydroxychloroquine-Azithromycin Therapy on COVID-19 Patients                                                                                                                | Not a randomized trial                                 |
| Mesri 2021        | The effects of combination of <i>Zingiber officinale</i> and <i>Echinacea</i> on alleviation of clinical symptoms and hospitalization rate of suspected COVID-19 outpatients: a randomized controlled trial.                  | Traditional Chinese or alternative medicine            |
| Hong-XingPan 2021 | Immunogenicity and Safety of a SARS-CoV-2 Inactivated Vaccine (KCONVAC) in Healthy Adults: Two Randomized, Double-blind, and Placebo-controlled Phase 1/2 Clinical Trials                                                     | Vaccine                                                |
| Kadali 2021       | Adverse effects of COVID-19 mRNA-1273 vaccine: A randomized, cross-sectional study on healthcare workers with detailed self-reported symptoms.                                                                                | Vaccine                                                |
| Caracciolo 2021   | Efficacy and Effect of Inhaled Adenosine Treatment in Hospitalized COVID-19 Patients.                                                                                                                                         | Not a randomized trial                                 |
| Goldin 2021       | Treatment-dose LMWH versus prophylactic/intermediate dose heparins in high risk COVID-19 inpatients: Rationale and design of the HEP-COVID Trial.                                                                             | Randomized trial with no results (e.g. trial registry) |
| McEneny-King 2021 | Pharmacokinetic and Pharmacodynamic Evaluation of Ravulizumab in Adults with Severe Coronavirus Disease 2019.                                                                                                                 | Randomized trial with no results (e.g. trial registry) |
| Efimov 2021       | The effect of azoximer bromide (Polyoxidonium-Æ) in patients hospitalized with coronavirus disease (COVID-19): an open-label, multicentre, interventional clinical study                                                      | Not a randomized trial                                 |
| Voysey 2021       | Single-dose administration and the influence of the timing of the booster dose on immunogenicity and efficacy of ChAdOx1 nCoV-19 (AZD1222) vaccine: a pooled analysis of four randomised trials (vol 397, pg 881, 2021)       | Vaccine                                                |
| Pu 2021           | The safety and immunogenicity of an inactivated SARS-CoV-2 vaccine in Chinese adults aged 18-59 years: a phase I randomized, double-blinded, controlled trial                                                                 | Vaccine                                                |
| Agusti 2021       | Early treatment with inhaled budesonide to prevent clinical deterioration in patients with COVID-19                                                                                                                           | Not a randomized trial                                 |
| Backer 2021       | A randomized, double-blind, placebo-controlled phase 1 trial of inhaled and intranasal niclosamide: A broad spectrum antiviral candidate for treatment of COVID-19.                                                           | Wrong population                                       |
| Ryzhikov 2021     | A SINGLE BLIND, PLACEBO-CONTROLLED RANDOMIZED STUDY OF THE SAFETY, REACTOGENICITY AND IMMUNOGENICITY OF THE "EPIVACCORONA" VACCINE FOR THE PREVENTION OF COVID-19, IN VOLUNTEERS AGED 18-60 YEARS (PHASE I-II)                | Vaccine                                                |
| Diaz 2020         | Geographical disparities in clinical outcomes of severe COVID-19 patients treated with remdesivir                                                                                                                             | Not a randomized trial                                 |

|                      |                                                                                                                                                                                                                                               |                                                        |
|----------------------|-----------------------------------------------------------------------------------------------------------------------------------------------------------------------------------------------------------------------------------------------|--------------------------------------------------------|
| Castagna 2020        | Baseline characteristics associated with clinical improvement and mortality in hospitalized patients with moderate COVID-19                                                                                                                   | Not a randomized trial                                 |
| Arribas 2020         | Impact of concomitant hydroxychloroquine use on safety and efficacy of remdesivir in moderate COVID-19 patients                                                                                                                               | Not a randomized trial                                 |
| Bosaeed 2021         | Multicentre randomised double-blinded placebo-controlled trial of favipiravir in adults with mild COVID-19.                                                                                                                                   | Randomized trial with no results (e.g. trial registry) |
| Kosari 2021          | The effect of propolis plus Hyoscyamus niger L. methanolic extract on clinical symptoms in patients with acute respiratory syndrome suspected to COVID-19: A clinical trial.                                                                  | Others                                                 |
| Kamran 2021          | Clearing the Fog: Is Hydroxychloroquine Effective in Reducing Coronavirus Disease-2019 Progression? A Randomized Controlled Trial                                                                                                             | Not a randomized trial                                 |
| Gonzalez-Castro 2021 | Combined therapy of tocilizumab and corticosteroids in severe SARS-CoV-2 disease.                                                                                                                                                             | Not a randomized trial                                 |
| Lopes 2021           | Randomized Clinical Trial to Evaluate a Routine Full Anticoagulation Strategy in Patients with Coronavirus Infection (SARS-CoV2) Admitted to Hospital: Rationale and Design of the ACTION (AntiCoagulation cOroNavirus), A Coalition IV Trial | Randomized trial with no results (e.g. trial registry) |
| Kharat 2021          | Self-proning in covid-19 patients on low-flow Oxygen therapy. A cluster randomised Controlled trial                                                                                                                                           | Oxygen delivery                                        |
| Ryzhikov 2021        | A single blind, placebo-controlled randomized study of the safety, reactogenicity and immunogenicity of the "EpiVacCorona" Vaccine for the prevention of COVID-19, in volunteers aged 18-60 years (phase I-II) (vol 11, pg 283, 2021)         | Vaccine                                                |
| Goepfert 2021        | Safety and immunogenicity of SARS-CoV-2 recombinant protein vaccine formulations in healthy adults: interim results of a randomised, placebo-controlled, phase 1-2, dose-ranging study.                                                       | Vaccine                                                |
| Chappell 2021        | Safety and immunogenicity of an MF59-adjuvanted spike glycoprotein-clamp vaccine for SARS-CoV-2: a randomised, double-blind, placebo-controlled, phase 1 trial.                                                                               | Vaccine                                                |
| Sadoff 2021          | Safety and Efficacy of Single-Dose Ad26.COV2.S Vaccine against Covid-19.                                                                                                                                                                      | Vaccine                                                |
| Pandit 2021          | Effectiveness and safety of thymosin alpha-1 in patients with severe COVID-19: A prospective open-label study                                                                                                                                 | Not a randomized trial                                 |
| Li 2021              | Safety and immunogenicity of the SARS-CoV-2 BNT162b1 mRNA vaccine in younger and older Chinese adults: a randomized, placebo-controlled, double-blind phase 1 study.                                                                          | Vaccine                                                |
| Xu 2021              | Efficacy and safety of Reduning injection in the treatment of COVID-19: a randomized, multicenter clinical study.                                                                                                                             | Traditional Chinese or alternative medicine            |
| Kvørper 2021         | Donors for SARS-CoV-2 Convalescent Plasma for a Controlled Clinical Trial: Donor Characteristics, Content and Time Course of SARS-CoV-2 Neutralizing Antibodies                                                                               | Not a randomized trial                                 |
| Ella 2021            | Safety and immunogenicity of an inactivated SARS-CoV-2 vaccine, BBV152: a double-blind, randomised, phase 1 trial (Jan, 10.1016/S1473-3099(20)30942-7, 2021)                                                                                  | Vaccine                                                |
| Wang 2021            | Safety and immunogenicity of COVID-19 vaccination in patients with non-alcoholic fatty liver disease (CHESS2101): a multicenter study                                                                                                         | Not a randomized trial                                 |
| Ni 2021              | Effects of Shuanghuanglian oral liquids on patients with COVID-19: a randomized, open-label, parallel-controlled, multicenter clinical trial                                                                                                  | Traditional Chinese or alternative medicine            |
| Gras-Valenti 2021    | [Effectiveness of the first dose of BNT162b2 vaccine to preventing covid-19 in healthcare personnel.]                                                                                                                                         | Vaccine                                                |
| Pan 2021             | Immunogenicity and safety of a SARS-CoV-2 inactivated vaccine in healthy adults: randomized, double-blind, and placebo-controlled phase 1 and phase 2 clinical trials                                                                         | Vaccine                                                |
| Padilla 2021         | Clinical Outcomes of COVID-19 Patients Treated with Convalescent Plasma or Remdesivir Alone and in Combination at a Community Hospital in California's Central Valley.                                                                        | Not a randomized trial                                 |
| Pulsipher 2021       | Remdesivir Use in COVID-19 Patients: Cutaneous Adverse Effect or Disease Manifestation?                                                                                                                                                       | Not a randomized trial                                 |
| Abu-Raddad 2021      | Effectiveness of the BNT162b2 Covid-19 Vaccine against the B.1.1.7 and B.1.351 Variants.                                                                                                                                                      | Not a randomized trial                                 |
| Shinde 2021          | Efficacy of NVX-CoV2373 Covid-19 Vaccine against the B.1.351 Variant.                                                                                                                                                                         | Vaccine                                                |

|                     |                                                                                                                                                                                                                             |                                             |
|---------------------|-----------------------------------------------------------------------------------------------------------------------------------------------------------------------------------------------------------------------------|---------------------------------------------|
| Okumus 2021         | Evaluation of the effectiveness and safety of adding ivermectin to treatment in severe COVID-19 patients.                                                                                                                   | Not a randomized trial                      |
| Bosaeed 2021        | Favipiravir and Hydroxychloroquine Combination Therapy in Patients with Moderate to Severe COVID-19 (FACCT): An Open-Label, Multicentre, Randomised, Controlled Trial (preprint)                                            | Removed from preprint server                |
| Hashemian 2020      | Blood purification techniques, inflammatory mediators and mortality in COVID-19 patients                                                                                                                                    | Not a randomized trial                      |
| Dal 2021            | Covid-19 Clinical Course and Blood Groups: Turkish Population-Based Study                                                                                                                                                   | Not a randomized trial                      |
| DiDomenico 2021     | Effectiveness of hydrogen peroxide as auxiliary treatment for COVID-19 hospitalized patients - preliminary results of a randomized double-blind clinical trial                                                              | Others                                      |
| Bakhshaliyev 2021   | The impact of hydroxychloroquine-azithromycin combination on Tpeak-to-end and Tpeak-to-end/QT ratio during a short treatment course.                                                                                        | Not a randomized trial                      |
| Barrett 2021        | Author Correction: Phase 1/2 trial of SARS-CoV-2 vaccine ChAdOx1 nCoV-19 with a booster dose induces multifunctional antibody responses                                                                                     | Vaccine                                     |
| Arrieta 2021        | Safety and Antibody Kinetics of COVID-19 Convalescent Plasma for the Treatment of Moderate to Severe Cases of SARS-CoV-2 Infection in Pediatric Patients.                                                                   | Not a randomized trial                      |
| Sahin 2021          | Effectiveness of ozone therapy in addition to conventional treatment on mortality in patients with COVID-19.                                                                                                                | Oxygen delivery                             |
| Kara 2021           | Effect of a single high dose of Vitamin D-3 on hospital length of stay in patients with moderate to severe COVID-19 A randomized clinical trial                                                                             | Not a randomized trial                      |
| Stephenson 2021     | Immunogenicity of the Ad26.COVS.2.S Vaccine for COVID-19.                                                                                                                                                                   | Vaccine                                     |
| Wu 2021             | Tolerability, Safety, Pharmacokinetics, and Immunogenicity of a Novel SARS-CoV-2 Neutralizing Antibody, Etesevimab in Chinese Healthy Adults: A Randomized, Double-Blind, Placebo-Controlled, First-In-Human Phase 1 Study. | Wrong population                            |
| Sanger 2021         | A randomized controlled clinical trial to evaluate the potential of ayurvedic medicines in patients with mild symptoms of COVID-19                                                                                          | Traditional Chinese or alternative medicine |
| English 2021        | Results of the cellular immuno-therapy for covid-19 related acute respiratory distress syndrome (circa-phase i trial                                                                                                        | Not a randomized trial                      |
| PhilippeGobeil 2021 | Interim Report of a Phase 2 Randomized Trial of a Plant-Produced Virus-Like Particle Vaccine for Covid-19 in Healthy Adults Aged 18-64 and Older Adults Aged 65 and Older                                                   | Vaccine                                     |
| Babamahmoodi 2021   | Effect of a herbal medicine containing Satureja hortensis L., Hypericum perforatum L. and foeniculum vulgare L. on patients with COVID-19 infection                                                                         | Traditional Chinese or alternative medicine |
| Freeman 2021        | Effects of different types of written vaccination information on COVID-19 vaccine hesitancy in the UK (OCEANS-III): a single-blind, parallel-group, randomised controlled trial.                                            | Vaccine                                     |
| Supady 2021         | Cytokine adsorption in patients with severe COVID-19 pneumonia requiring extracorporeal membrane oxygenation (CYCOV): a single centre, open-label, randomised, controlled trial.                                            | External organ support                      |
| Bian 2021           | Safety and efficacy of meplazumab in healthy volunteers and COVID-19 patients: a randomized phase 1 and an exploratory phase 2 trial.                                                                                       | Not a randomized trial                      |
| Pimpinelli 2021     | Fifth-week immunogenicity and safety of anti-SARS-CoV-2 BNT162b2 vaccine in patients with multiple myeloma and myeloproliferative malignancies on active treatment: preliminary data from a single institution.             | Vaccine                                     |
| Iannone 2021        | Safety and efficacy of the BNT162b2 mRNA Covid-19 vaccine during Ixekizumab treatment for hidradenitis suppurativa                                                                                                          | Vaccine                                     |
| Ward 2021           | Phase 1 randomized trial of a plant-derived virus-like particle vaccine for COVID-19.                                                                                                                                       | Vaccine                                     |
| Keyhani 2021        | A telehealth-based randomized controlled trial: A model for outpatient trials of off-label medications during the COVID-19 pandemic.                                                                                        | Not a randomized trial                      |
| Madhi 2021          | Efficacy of the ChAdOx1 nCoV-19 Covid-19 Vaccine against the B.1.351 Variant                                                                                                                                                | Vaccine                                     |
| Sehgal 2021         | A randomised trial of Mycobacterium w in critically ill patients with COVID-19: ARMY-1                                                                                                                                      | Others                                      |
| AlKaabi 2021        | Effect of 2 Inactivated SARS-CoV-2 Vaccines on Symptomatic COVID-19 Infection in Adults: A Randomized Clinical Trial                                                                                                        | Vaccine                                     |

|                        |                                                                                                                                                                                                                                                                 |                                                        |
|------------------------|-----------------------------------------------------------------------------------------------------------------------------------------------------------------------------------------------------------------------------------------------------------------|--------------------------------------------------------|
| Zolotovskaia 2021      | [Post-COVID-19 asthenic syndrome]                                                                                                                                                                                                                               | Not a randomized trial                                 |
| Selvaraj 2021          | Tocilizumab in Hospitalized Patients with COVID-19: A Meta Analysis of Randomized Controlled Trials                                                                                                                                                             | Not a randomized trial                                 |
| Gagneux-Brunon 2021    | Acceptability of a COVID-19 pre-exposure prophylaxis trial with hydroxychloroquine in French healthcare workers during the first wave of COVID-19 pandemic                                                                                                      | Not a randomized trial                                 |
| Tian 2021              | Efficacy and safety of short-wave diathermy treatment for moderate COVID-19 patients: a prospective, double-blind, randomized controlled clinical study                                                                                                         | Exercise/rehabilitation                                |
| Meister 2021           | Virucidal Efficacy of Different Oral Rinses Against Severe Acute Respiratory Syndrome Coronavirus 2 (vol 222, pg 1289, 2020)                                                                                                                                    | Not a randomized trial                                 |
| Adly 2021              | Telemanagement of Home-Isolated COVID-19 Patients Using Oxygen Therapy With Noninvasive Positive Pressure Ventilation and Physical Therapy Techniques: Randomized Clinical Trial.                                                                               | Oxygen delivery                                        |
| Feng 2021              | Traditional Chinese Medicine Shenhuang Granule in Patients with Severe/Critical COVID-19: A Randomized Controlled Multicenter Trial                                                                                                                             | Traditional Chinese or alternative medicine            |
| Takuva 2021            | Thromboembolic Events in the South African Ad26.COV2.S Vaccine Study.                                                                                                                                                                                           | Vaccine                                                |
| Oakes 2021             | Effect of Opt-In vs Opt-Out Framing on Enrollment in a COVID-19 Surveillance Testing Program: The COVID SAFE Randomized Clinical Trial.                                                                                                                         | Wrong population                                       |
| Gupta 2021             | Prospective, randomized, open-label, blinded end point, two-arm, comparative clinical study to evaluate the efficacy and safety of a Fixed Ayurvedic Regimen (FAR) as add-on to conventional treatment in the management of mild and moderate COVID-19 patients | Traditional Chinese or alternative medicine            |
| Patchen 2021           | Genetically Predicted Serum Vitamin D and COVID-19: A Mendelian Randomization Study                                                                                                                                                                             | Not a randomized trial                                 |
| McQuade 2021           | ChAdOx1 nCoV-19 vaccine: asymptomatic efficacy estimates                                                                                                                                                                                                        | Not a randomized trial                                 |
| Sarmiento 2021         | Ruxolitinib for Severe COVID-19-Related Hyperinflammation in Nonresponders to Steroids                                                                                                                                                                          | Not a randomized trial                                 |
| Jaber 2021             | Effect of the use of an endotracheal tube and stylet versus an endotracheal tube alone on first-attempt intubation success: a multicentre, randomised clinical trial in 999 patients.                                                                           | Wrong population                                       |
| Richier 2021           | Efficacité du Tocilizumab dans la COVID-19 – + modV@rv@e v† sv@v*re~†: une cohorte franV@ise exposV@-non exposV@                                                                                                                                                | Not a randomized trial                                 |
| Spagnuolo 2021         | Viral clearance after early corticosteroid treatment in patients with moderate or severe covid-19 (vol 10, 21291, 2020)                                                                                                                                         | Not a randomized trial                                 |
| Sozio 2021             | CORonavirus-19 mild to moderate pneumonia Management with blood Ozonization in patients with Respiratory failure (CORMOR) multicentric prospective randomized clinical trial                                                                                    | Oxygen delivery                                        |
| AlShehry 2021          | Safety and Efficacy of Convalescent Plasma for Severe COVID-19: Interim Report of a Multicenter Phase II Study from Saudi Arabia (vol 9, pg 16, 2021)                                                                                                           | Not a randomized trial                                 |
| ArvindChopra 2021      | Coadministration of AYUSH 64 as an adjunct to Standard of Care in mild and moderate COVID-19: A randomised, controlled, multicentric clinical trial                                                                                                             | Traditional Chinese or alternative medicine            |
| Pan 2021               | Immunogenicity and safety of a severe acute respiratory syndrome coronavirus 2 inactivated vaccine in healthy adults: randomized, double-blind, and placebo-controlled phase 1 and phase 2 clinical trials.                                                     | Vaccine                                                |
| Lanthier 2021          | [In patients hospitalized for COVID-19 with hypoxia and systemic inflammation, does tocilizumab reduce 28-days mortality compared to standard treatment, and is it safe?]                                                                                       | Not a randomized trial                                 |
| Nursilawatisyamsi 2021 | The effectiveness of poly-herbal adjuvants for the standard treatment of COVID 19 in patients with moderate degree                                                                                                                                              | Traditional Chinese or alternative medicine            |
| dePaulaEduardo 2021    | Salivary SARS-CoV-2 load reduction with mouthwash use: a randomized pilot clinical trial                                                                                                                                                                        | Others                                                 |
| Polineni 2021          | A phase iia, double-blinded, randomized placebo-controlled trial of mapkapk2 inhibition by ati-450 in treatment of moderate-severe covid-19 pneumonia                                                                                                           | Randomized trial with no results (e.g. trial registry) |
| Hulbert 2021           | Respiratory disease, and treatment / thematic poster session a novel approach to medical monitoring during the sars-cov-2 pandemic supporting the activ 4b outpatient anticoagulation trial                                                                     | Not a randomized trial                                 |

|                       |                                                                                                                                                                                                                   |                                                        |
|-----------------------|-------------------------------------------------------------------------------------------------------------------------------------------------------------------------------------------------------------------|--------------------------------------------------------|
| Youssef 2021          | Vip in the treatment of critical COVID-19 respiratory failure in patients with severe comorbidities                                                                                                               | Not a randomized trial                                 |
| Collins 2021          | Administration of COVID-19 convalescent plasma in a metropolitan health care system                                                                                                                               | Not a randomized trial                                 |
| Frater 2021           | Safety and immunogenicity of the ChAdOx1 nCoV-19 (AZD1222) vaccine against SARS-CoV-2 in HIV infection: a single-arm substudy of a phase 2/3 clinical trial                                                       | Vaccine                                                |
| Wolak 2021            | Inhaled nitric oxide for the treatment of COVID-19 and other viral pneumonias in adults                                                                                                                           | Randomized trial with no results (e.g. trial registry) |
| Mertes 2021           | Liposomal encapsulation of trans-crocin enhances oxygenation in patients with COVID-19-related ARDS receiving mechanical ventilation                                                                              | Randomized trial with no results (e.g. trial registry) |
| Vandormael 2021       | Effect of a wordless, animated, social media video intervention on COVID-19 prevention: an online randomized controlled trial of 15,163 adults in the USA, Mexico, UK, Germany, and Spain.                        | Wrong population                                       |
| Vityala 2021          | Potential effects of itolizumab treatment on plasma interleukin-6 levels in patients with severe COVID-19.                                                                                                        | Not a randomized trial                                 |
| Flaxman 2021          | Tolerability and Immunogenicity After a Late Second Dose or a Third Dose of ChAdOx1 nCoV-19 (AZD1222) (preprint)                                                                                                  | Vaccine                                                |
| Hsieh 2021            | Safety and immunogenicity of a Recombinant Stabilized Prefusion SARS-CoV-2 Spike Protein Vaccine (MVCCOV1901) Adjuvanted with CpG 1018 and Aluminum Hydroxide in healthy adults: A Phase 1, dose-escalation study | Vaccine                                                |
| Borobia 2021          | Immunogenicity and reactogenicity of BNT162b2 booster in ChAdOx1-S-primed participants (CombiVacS): a multicentre, open-label, randomised, controlled, phase 2 trial                                              | Vaccine                                                |
| Han 2021              | Safety, tolerability, and immunogenicity of an inactivated SARS-CoV-2 vaccine (CoronaVac) in healthy children and adolescents: a double-blind, randomised, controlled, phase 1/2 clinical trial                   | Vaccine                                                |
| Heath 2021            | Safety and Efficacy of NVX-CoV2373 Covid-19 Vaccine                                                                                                                                                               | Vaccine                                                |
| Rodriguez-Blanco 2021 | Short-Term Effects of a Conditioning Telerehabilitation Program in Confined Patients Affected by COVID-19 in the Acute Phase. A Pilot Randomized Controlled Trial                                                 | Exercise/rehabilitation                                |
| Kim 2021              | Dexamethasone may improve severe COVID-19 via ameliorating endothelial injury and inflammation: A preliminary pilot study.                                                                                        | Not a randomized trial                                 |
| Kjellberg 2021        | Randomised, controlled, open label, multicentre clinical trial to explore safety and efficacy of hyperbaric oxygen for preventing ICU admission, morbidity and mortality in adult patients with COVID-19          | Oxygen delivery                                        |
| Edara 2021            | Infection and Vaccine-Induced Neutralizing-Antibody Responses to the SARS-CoV-2 B.1.617 Variants                                                                                                                  | Vaccine                                                |
| Guo 2021              | Safety and immunogenicity of an inactivated SARS-CoV-2 vaccine in healthy adults aged 18 years or older: A randomized, double-blind, placebo-controlled, phase 1/2 trial                                          | Vaccine                                                |
| Tanriover 2021        | Efficacy and safety of an inactivated whole-virion SARS-CoV-2 vaccine (CoronaVac): interim results of a double-blind, randomised, placebo-controlled, phase 3 trial in Turkey                                     | Vaccine                                                |
| Al-Haidari 2021       | Clinical trial of black seeds against covid ,Äi 19 in Kirkuk city/ Iraq                                                                                                                                           | Traditional Chinese or alternative medicine            |
| Jin 2021              | Retraction Note to: Methylene blue photochemical treatment as a reliable SARS-CoV-2 plasma virus inactivation method for blood safety and convalescent plasma therapy for COVID-19.                               | Not a randomized trial                                 |
| Karina 2021           | Phase I/II Clinical Trial of Autologous Activated Platelet-Rich Plasma (aaPRP) in the Treatment of Severe Coronavirus Disease 2019 (COVID-19) Patients                                                            | Not a randomized trial                                 |
| Karina 2021           | The Effect of Intravenous Autologous Activated Platelet-Rich Plasma Therapy on "Profibrotic Cytokine" IL-1 $\alpha$ Levels in Severe and Critical COVID-19 Patients: A Preliminary Study                          | Not a randomized trial                                 |
| Umemura 2021          | Efficacy and safety of nintedanib for pulmonary fibrosis in severe pneumonia induced by COVID-19: An interventional study.                                                                                        | Not a randomized trial                                 |
| Avdeev 2021           | N-acetylcysteine for the treatment of COVID-19 among hospitalized patients                                                                                                                                        | Not a randomized trial                                 |
| Bosch 2021            | Effect of dexamethasone on direct Xa-inhibitor oral anticoagulant plasma levels in patients with COVID-19                                                                                                         | Not a randomized trial                                 |

|                     |                                                                                                                                                                                                                                                                       |                                                        |
|---------------------|-----------------------------------------------------------------------------------------------------------------------------------------------------------------------------------------------------------------------------------------------------------------------|--------------------------------------------------------|
| Torres 2021         | Effect of Physician-Delivered COVID-19 Public Health Messages and Messages Acknowledging Racial Inequity on Black and White Adults; Knowledge, Beliefs, and Practices Related to COVID-19: A Randomized Clinical Trial                                                | Wrong population                                       |
| Liu 2021            | Combination of Hua Shi Bai Du Granule (Q-14) and Standard Care in the Treatment of Patients with Coronavirus Disease 2019 (COVID-19): A Single-center, Open-label, Randomized Controlled Trial                                                                        | Traditional Chinese or alternative medicine            |
| Gonzalez-Gerez 2021 | Short-Term Effects of a Respiratory Telerehabilitation Program in Confined COVID-19 Patients in the Acute Phase: A Pilot Study                                                                                                                                        | Exercise/rehabilitation                                |
| Wanfangdan 2020     | Influence of Baduanjin on the health effects of patients with cold-dampness-stagnation type of new coronavirus pneumonia                                                                                                                                              | Exercise/rehabilitation                                |
| Hu Cong 2020        | The clinical efficacy of high-dose or low-dose chloroquine diphosphate as an adjuvant treatment for hospitalized patients with novel coronavirus pneumonia                                                                                                            | Not a randomized trial                                 |
| NR 2020             | Ruijin Hospital Affiliated to Shanghai Jiaotong University School of Medicine released the results of a multi-center clinical study of hydroxychloroquine in the treatment of novel coronavirus pneumonia %J Journal of Shanghai Jiaotong University (Medical Edition | Not a randomized trial                                 |
| Wei Runan 2020      | A multi-center, prospective study of early abidol + lopinavir/ritonavir + recombinant interferon $\alpha$ -2b combined antiviral therapy in patients with novel coronavirus pneumonia in Zhejiang Province                                                            | Not a randomized trial                                 |
| Wang Yali 2020      | Preliminary clinical efficacy analysis of traditional Chinese medicine taken orally plus fumigation combined with super-high dose vitamin C in the treatment of new coronavirus pneumonia                                                                             | Others                                                 |
| Li Min 2020         | Observation of the application effect of high-flow humidification oxygen therapy through the nose in the treatment of new coronavirus pneumonia complicated with acute respiratory failure                                                                            | Oxygen delivery                                        |
| Summer Games 2020   | Comparison of the clinical effects of conventional nasal catheter oxygen inhalation and high-flow oxygen inhalation in the treatment of new coronavirus pneumonia                                                                                                     | Oxygen delivery                                        |
| Liu Huijun 2020     | Clinical effect of dulaglutide injection in the treatment of new type of coronavirus pneumonia with type 2 diabetes                                                                                                                                                   | Randomized trial with no results (e.g. trial registry) |
| Yan Bohua 2020      | Large-sample prospective clinical study of Huoxiangzhengqi Oral Liquid and Jinhaojiere Granules in the preventive intervention of COVID-19 in the community %J Chinese Journal of Chinese Materia Medica                                                              | Traditional Chinese or alternative medicine            |
| Sun Huimin 2020     | Clinical Observation of Lianhua Qingke Granules in Treating Mild and Common New Type Coronavirus Pneumonia                                                                                                                                                            | Traditional Chinese or alternative medicine            |
| Shi Suofang 2020    | Clinical Study on Treatment of 30 Cases of Qi and Yin Deficiency Syndrome in the Recovery Period of Novel Coronavirus Pneumonia by Comprehensive Therapy of Traditional Chinese Medicine                                                                              | Traditional Chinese or alternative medicine            |
| Liu Lin 2020        | Effect of moxibustion on clinical symptoms, peripheral blood inflammatory indexes and T lymphocyte subsets in patients with new coronavirus pneumonia                                                                                                                 | Traditional Chinese or alternative medicine            |
| Huffin 2020         | Multicenter clinical observation of honeysuckle oral liquid combined with western medicine in the treatment of common type of new coronavirus pneumonia                                                                                                               | Traditional Chinese or alternative medicine            |
| Zhang Youli 2020    | Analysis of Clinical Efficacy of Honeysuckle Oral Liquid in the Treatment of 80 Cases of New Coronavirus Pneumonia                                                                                                                                                    | Traditional Chinese or alternative medicine            |
| Ding Xiaojuan 2020  | Clinical efficacy and mechanism of Qingfei Touxie Fuzheng Recipe in the treatment of new coronavirus pneumonia                                                                                                                                                        | Traditional Chinese or alternative medicine            |
| Ding Xiaojuan 2020  | Study on the Clinical Efficacy and Mechanism of Qingfei Toxie Fuzheng Decoction in the Treatment of Novel Coronavirus Pneumonia                                                                                                                                       | Traditional Chinese or alternative medicine            |
| Yu Ping 2020        | Efficacy of Lianhua Qingwen Granules combined with Arbidol in the treatment of mild new coronavirus pneumonia                                                                                                                                                         | Traditional Chinese or alternative medicine            |
| Duan Can 2020       | Clinical Observation of Jinhua Qinggan Granules in Treating New Type Coronavirus Infected Pneumonia                                                                                                                                                                   | Traditional Chinese or alternative medicine            |
| Zhang Chuantao 2020 | Clinical study on the treatment of new type of coronavirus pneumonia (COVID-19                                                                                                                                                                                        | Traditional Chinese or alternative medicine            |
| Fu Xiaoxia 2020     | Clinical Study on 37 Cases of Novel Coronavirus Pneumonia Treated by Integrated Traditional Chinese and Western Medicine                                                                                                                                              | Traditional Chinese or alternative medicine            |

|                        |                                                                                                                                                                                                                                                                 |                                                        |
|------------------------|-----------------------------------------------------------------------------------------------------------------------------------------------------------------------------------------------------------------------------------------------------------------|--------------------------------------------------------|
| Yan Bohua 2020         | Large-sample prospective clinical study on the preventive intervention of COVID-19 in the community by the combined use of Huoxiangzhengqi oral liquid and Jinhaojiere granules                                                                                 | Traditional Chinese or alternative medicine            |
| Qiu Min 2020           | Observation on the Efficacy of Moxing Xuanfei Jiedu Decoction in the Treatment of New Type Coronavirus Pneumonia                                                                                                                                                | Traditional Chinese or alternative medicine            |
| Wang Yali 2020         | Preliminary clinical efficacy analysis of oral Chinese medicine plus fumigation combined with super-high dose vitamin C in the treatment of new coronavirus pneumonia                                                                                           | Traditional Chinese or alternative medicine            |
| Sun Huimin 2020        | Study on the clinical efficacy of Lianhua Qingke Granules in the treatment of mild and common new coronavirus pneumonia                                                                                                                                         | Traditional Chinese or alternative medicine            |
| Liu Mailan 2020        | Research on the Significance and Operation Mode of Moxibustion Intervention for New Coronavirus Pneumonia Close Contact and Isolated Persons                                                                                                                    | Traditional Chinese or alternative medicine            |
| Wang 2021              | Efficacy and Safety of Leflunomide for Refractory COVID-19: A Pilot Study                                                                                                                                                                                       | Not a randomized trial                                 |
| Olender 2021           | Remdesivir Versus Standard-of-Care for Severe Coronavirus Disease 2019 Infection: An Analysis of 28-Day Mortality                                                                                                                                               | Not a randomized trial                                 |
| [DataMissing] 2021     | Early convalescent plasma may lower risk and progression of COVID in seniors ,Ä Argentine trial                                                                                                                                                                 | Not a randomized trial                                 |
| Plaza 2020             | Use of Convalescent Plasma in COVID-19 Patients: Guayaquil, Ecuador Experience                                                                                                                                                                                  | Not a randomized trial                                 |
| Premachandran 2021     | AVIFAVIR in Treating Patients with Moderate COVID 19...lvashchenko AA, Kirill AD, Natalia VV, et al. AVIFAVIR for treatment of patients with moderate COVID-19: interim results of a phase II/III multicenter randomized clinical trial. Clin Infect Dis. 2021; | Not a randomized trial                                 |
| Haibel 2021            | Successful treatment of severe COVID-19 pneumonia and cytokine release with simultaneous tocilizumab and anakinra with one-month follow-up                                                                                                                      | Not a randomized trial                                 |
| Weinbergerova 2021     | Successful early treatment combining remdesivir with high-titer convalescent plasma among COVID-19-infected hematological patients                                                                                                                              | Not a randomized trial                                 |
| Scherthaner 2021       | Effects of a DPP-4 Inhibitor and RAS Blockade on Clinical Outcomes of Patients with Diabetes and COVID-19 (Diabetes Metab J 2021;45:251-9).                                                                                                                     | Not a randomized trial                                 |
| AntoniaAnna 2021       | Candesartan as a tentative treatment for COVID-19: a prospective non-randomized open-label study. (Special Issue: Coronavirus (COVID-19) collection.)                                                                                                           | Not a randomized trial                                 |
| MousaviDarzikolae 2021 | Low-dose whole-lung irradiation in severe COVID-19 pneumonia: a controlled clinical trial.                                                                                                                                                                      | Not a randomized trial                                 |
| Reactions Weekly 2021  | Remdesivir vs tocilizumab in COVID-19: adverse event profiles                                                                                                                                                                                                   | Not a randomized trial                                 |
| Mousavi 2021           | Melatonin effects on sleep quality and outcomes of COVID-19 patients: An open-label, Randomized, Controlled Trial.                                                                                                                                              | Not a randomized trial                                 |
| Zhang 2021             | SIM01 as a novel microbiome replacement therapy for COVID-19: An open-label pilot study                                                                                                                                                                         | Not a randomized trial                                 |
| Ebrahimi 2021          | Evaluating the efficacy of extracted squalene from seed oil in the form of microemulsion for the treatment of COVID-19: A clinical study                                                                                                                        | Not a randomized trial                                 |
| Gupta 2021             | Open-label randomized control trial of hydroxychloroquine in patients with moderate to severe coronavirus disease 2019 infection                                                                                                                                | Not a randomized trial                                 |
| Khah 2021              | The effect of online mindfulness program on physical pain, stress and depression in the covid-19 patients: A randomized control trail                                                                                                                           | Psychological and educational                          |
| Elzein 2021            | In vivo evaluation of the virucidal efficacy of chlorhexidine and povidone-iodine mouthwashes against salivary SARS-CoV-2. A randomized-controlled clinical trial                                                                                               | Others                                                 |
| DeMarchi 2021          | Effects of Photobiomodulation Therapy Combined with Static Magnetic Field in Severe COVID-19 Patients Requiring Intubation: A Pragmatic Randomized Placebo-Controlled Trial                                                                                     | Others                                                 |
| Rangon 2021            | Auricular Neuromodulation for Mass Vagus Nerve Stimulation: Insights From SOS COVID-19 a Multicentric, Randomized, Controlled, Double-Blind French Pilot Study                                                                                                  | Others                                                 |
| Granados-Montiel 2021  | New prophylaxis regimen for SARS-CoV-2 infection in health professionals with low doses of hydroxychloroquine and bromhexine: a randomised, double-blind placebo clinical trial (ELEVATE Trial).                                                                | Randomized trial with no results (e.g. trial registry) |

|                      |                                                                                                                                                                                                                                        |                                                        |
|----------------------|----------------------------------------------------------------------------------------------------------------------------------------------------------------------------------------------------------------------------------------|--------------------------------------------------------|
| Halford 2021         | SPIKE-1: A Randomised Phase II/III trial in a community setting, assessing use of camostat in reducing the clinical progression of COVID-19 by blocking SARS-CoV-2 Spike protein-initiated membrane fusion                             | Randomized trial with no results (e.g. trial registry) |
| Meng 2021            | Safety, tolerability, pharmacokinetic characteristics, and immunogenicity of MW33: A Phase 1 clinical study of the SARS-CoV-2 RBD-targeting monoclonal antibody.                                                                       | Wrong population                                       |
| Holman 2021          | Accelerated first-in-human clinical trial of EIDD-2801/MK-4482 (molnupiravir), a ribonucleoside analog with potent antiviral activity against SARS-CoV-2                                                                               | Wrong population                                       |
| Supady 2021          | Cytokine adsorption in patients with severe COVID-19 pneumonia requiring extracorporeal membrane oxygenation (CYCOV): a single centre, open-label, randomised, controlled trial (vol 9, pg 755, 2021)                                  | External organ support                                 |
| MohammadBargahi 2021 | Effect of Balloon-Blowing on Dyspnea and Oxygenation in Noncritical Adult Covid19 Patients: A Pilot Study                                                                                                                              | Oxygen delivery                                        |
| Fakhr 2021           | Inhaled High Dose Nitric Oxide is a Safe and Effective Respiratory Treatment in Spontaneous Breathing Hospitalized Patients with COVID-19 pneumonia                                                                                    | Oxygen delivery                                        |
| Ehrmann 2021         | Awake prone positioning for COVID-19 acute hypoxaemic respiratory failure: a randomised, controlled, multinational, open-label meta-trial                                                                                              | Oxygen delivery                                        |
| AlKaabi 2021         | Effect of 2 Inactivated SARS-CoV-2 Vaccines on Symptomatic COVID-19 Infection in Adults: A Randomized Clinical Trial.                                                                                                                  | Vaccine                                                |
| AlKaabi 2021         | Effect of 2 Inactivated SARS-CoV-2 Vaccines on Symptomatic COVID-19 Infection in AdultsA Randomized Clinical Trial: The Journal of the American Medical Association                                                                    | Vaccine                                                |
| Shu 2021             | Immunogenicity and safety of a recombinant fusion protein vaccine (V-01) against coronavirus disease 2019 in healthy adults: a randomized, double-blind, placebo-controlled, phase II trial.                                           | Vaccine                                                |
| Mulhern 2021         | Humoral Response to mRNA versus an Adenovirus Vector-Based SARS-COV2 (Ad26.COV2.S) Vaccine in Dialysis Patients.                                                                                                                       | Vaccine                                                |
| Wu 2021              | Safety, tolerability, and immunogenicity of an aerosolised adenovirus type-5 vector-based COVID-19 vaccine (Ad5-nCoV) in adults: preliminary report of an open-label and randomised phase 1 clinical trial.                            | Vaccine                                                |
| YongliangFeng 2021   | Safety and Immunogenicity of Inactivated SARS-CoV-2 Vaccine in High-Risk Occupational Population: a randomized, parallel, controlled clinical trial                                                                                    | Vaccine                                                |
| Segundo 2021         | Immune assessment of BNT162b2 m-RNA-spike based vaccine response in adults                                                                                                                                                             | Vaccine                                                |
| ValerieGOUNANT 2021  | Efficacy of SARS-CoV-2 vaccine in thoracic cancer patients: a prospective study supporting a third dose in patients with minimal serologic response after two vaccine doses                                                            | Vaccine                                                |
| Urbanowicz 2021      | Two doses of the SARS-CoV-2 BNT162b2 vaccine enhances antibody responses to variants in individuals with prior SARS-CoV-2 infection.                                                                                                   | Vaccine                                                |
| Ali 2021             | Evaluation of mRNA-1273 SARS-CoV-2 Vaccine in Adolescents.                                                                                                                                                                             | Vaccine                                                |
| Kremsner 2021        | Safety and immunogenicity of an mRNA-lipid nanoparticle vaccine candidate against SARS-CoV-2 : A-†phase-†1 randomized clinical trial.                                                                                                  | Vaccine                                                |
| Zhang 2021           | Safety and immunogenicity of a recombinant interferon-armed RBD dimer vaccine (V-01) for COVID-19 in healthy adults: a randomized, double-blind, placebo-controlled, Phase I trial.                                                    | Vaccine                                                |
| Madhi 2021           | Safety and immunogenicity of the ChAdOx1 nCoV-19 (AZD1222) vaccine against SARS-CoV-2 in people living with and without HIV in South Africa: an interim analysis of a randomised, double-blind, placebo-controlled, phase 1B/2A trial. | Vaccine                                                |
| Kulkarni 2021        | A Phase 2/3, Observer-Blind, Randomised, Controlled Study to Assess the Safety and Immunogenicity of SII-ChAdOx1 nCoV-19 (COVID-19 Vaccine) in Adults in India (preprint)                                                              | Vaccine                                                |
| MichaelBonelli 2021  | Additional heterologous versus homologous booster vaccination in immunosuppressed patients without SARS-CoV-2 antibody seroconversion after primary mRNA vaccination: a randomized controlled trial                                    | Vaccine                                                |
| Meylan 2021          | Safety and efficacy of the Oxford-AstraZeneca vaccine: Interim analysis of four randomized controlled trials                                                                                                                           | Vaccine                                                |
| Flaxman 2021         | Reactogenicity and immunogenicity after a late second dose or a third dose of ChAdOx1 nCoV-19 in the UK: a substudy of two randomised controlled trials (COV001 and COV002)                                                            | Vaccine                                                |

|                       |                                                                                                                                                                                                                                                                 |                                                        |
|-----------------------|-----------------------------------------------------------------------------------------------------------------------------------------------------------------------------------------------------------------------------------------------------------------|--------------------------------------------------------|
| Xiao 2020             | Efficacy of Huoxiang Zhengqi dropping pills and Lianhua Qingwen granules in treatment of COVID-19: a randomized controlled trial. (Special Issue: Pharmacoepidemiology and pathogenetics of 2019-nCoV.)                                                         | Traditional Chinese or alternative medicine            |
| Koshak 2021           | Nigella sativa for the treatment of COVID-19;an open-label randomized controlled clinical trial                                                                                                                                                                 | Traditional Chinese or alternative medicine            |
| Popovych 2021         | A randomized, open-label, multicentre, comparative study of therapeutic efficacy, safety, and tolerability of BNO 1030 extract, containing marshmallow root, chamomile flowers, horsetail herb, walnut leaves, yarrow herb, oak bark, dandelion herb, in the tr | Traditional Chinese or alternative medicine            |
| Srivastava 2021       | Efficacy of two siddha polyherbal decoctions, Nilavembu Kudineer and Kaba Sura Kudineer, along with standard allopathy treatment in the management of mild to moderate symptomatic COVID-19 patients-a double-blind, placebo-controlled, clinical trial         | Traditional Chinese or alternative medicine            |
| Jayanthi 2021         | A randomized control study to evaluate the role of herbal immunomodulators in boosting the immunity and overall health of healthcare workers in COVID-19 wards: An exploratory, feedback clinical study                                                         | Traditional Chinese or alternative medicine            |
| Mohamed 2021          | The effect of aerobic exercise on immune biomarkers and symptoms severity and progression in patients with COVID-19: A randomized control trial                                                                                                                 | Exercise/rehabilitation                                |
| Almaghlouth 2021      | THE USE OF SINGLE THERAPY WITH TOCILIZUMAB VERSUS COMBINATION THERAPY WITH REMDESIVIR IN SARS-COV-2 PATIENTS IN EL PASO TEXAS                                                                                                                                   | Duplicate                                              |
| Papachristofilou 2021 | Low dose radiation therapy for severe COVID-19 pneumonia: a randomized double-blind study                                                                                                                                                                       | Others                                                 |
| Corritori 2021        | Multicenter, open-labeled efficacy study of avifavir in patients with COVID-19                                                                                                                                                                                  | Not a randomized trial                                 |
| Avdeev 2021           | Beneficial effects of inhaled surfactant in patients with COVID-19-associated acute respiratory distress syndrome.                                                                                                                                              | Not a randomized trial                                 |
| KaviSharma 2021       | Prospective, Randomized, Parallel-Group, Open-Label Study to Evaluate the Efficacy and Safety of IMU-838, in Combination with Oseltamivir, in Adults with Coronavirus Disease 19 The IONIC Trial                                                                | Randomized trial with no results (e.g. trial registry) |
| Liu 2021              | Effect of qigong exercise and acupressure rehabilitation program on pulmonary function and respiratory symptoms in patients hospitalized with severe COVID-19: a randomized controlled trial                                                                    | Exercise/rehabilitation                                |
| Liu 2021              | Effect of qigong exercise and acupressure rehabilitation program on pulmonary function and respiratory symptoms in patients hospitalized with severe COVID-19                                                                                                   | Exercise/rehabilitation                                |
| McClellandlii 2021    | Low-Dose Whole Thorax Radiation Therapy for COVID-19 Pneumonia: Inpatient Onboarding Process for a Randomized Controlled Trial                                                                                                                                  | External organ support                                 |
| Esposito 2021         | Effects of different dialysis techniques on inflammation in maintenance hemodialysis patients with covid-19: A randomized study                                                                                                                                 | External organ support                                 |
| Dengiz 2022           | Ozone gas applied through nebulization as adjuvant treatment for lung respiratory diseases due to COVID-19 infections: a prospective randomized trial                                                                                                           | External organ support                                 |
| Pablo-Marcos 2021     | [YODADA Y PEROXIDO DE HIDROGENO EN PACIENTES CON COVID-19].                                                                                                                                                                                                     | Not a randomized trial                                 |
| Ortiz 2021            | The clinical efficacy of low-dose whole-lung irradiation in moderate-to-severe COVID-19 pneumonia: RTMX-20 trial                                                                                                                                                | Not a randomized trial                                 |
| Kageyama 2022         | Lactobacillus plantarum induces innate cytokine responses that potentially provide a protective benefit against COVID-19: A single-arm, double-blind, prospective trial combined with an in vitro cytokine response assay                                       | Not a randomized trial                                 |
| Gong 2021             | Efficacy and Safety of Lianhuaqingwen Capsules for the Prevention of Coronavirus Disease 2019: A Prospective Open-Label Controlled Trial                                                                                                                        | Not a randomized trial                                 |
| Shindo 2021           | Japanese, multicenter, phase II trial of combination therapy with favipiravir and methylprednisolone for COVID,Â€19 patients with non,Â€critical respiratory failure: the J,Â€critical trial                                                                    | Not a randomized trial                                 |
| Feng 2021             | Yindan Jiedu granules exhibit anti-inflammatory effect in patients with novel Coronavirus disease (COVID-19) by suppressing the NF-kappaB signaling pathway                                                                                                     | Not a randomized trial                                 |
| Abolghasemi 2021      | Impact of time and mechanical ventilation on convalescent plasma in severe/critically ill COVID-19 patients                                                                                                                                                     | Not a randomized trial                                 |
| Campione 2021         | Lactoferrin as antiviral treatment in COVID-19 management: Preliminary evidence                                                                                                                                                                                 | Not a randomized trial                                 |

|                          |                                                                                                                                                                                                                                   |                           |
|--------------------------|-----------------------------------------------------------------------------------------------------------------------------------------------------------------------------------------------------------------------------------|---------------------------|
| wang 2021                | Potent Anti-Delta Effect By a Booster Third-Dose of UB-612, a Precision-Designed SARS-CoV-2 Multitope Protein-Peptide Vaccine (preprint)                                                                                          | Not a randomized trial    |
| Grbovic 2021             | The effects of respiratory exercises on partial pressures of gases and anxiety in the acute phase of COVID-19 infection                                                                                                           | Not a randomized trial    |
| Perrone 2021             | Correction to: Tocilizumab for patients with COVID-19 pneumonia. The single-arm TOCIVID-19 prospective trial                                                                                                                      | Not a randomized trial    |
| Mahajan 2021             | Role of Dexamethasone on Oxygen Requirement, Mortality, and Survival Incidence among COVID-19 Patients: Quasi-Experimental Study.                                                                                                 | Not a randomized trial    |
| Erelel 2021              | Early Effects of Low Molecular Weight Heparin Therapy with Soft-Mist Inhaler for COVID-19-Induced Hypoxemia: A Phase IIb Trial                                                                                                    | Not a randomized trial    |
| Dehghan 2021             | The potential anti-inflammatory effects of zerumbone in covid-19 patients                                                                                                                                                         | Not a randomized trial    |
| Soliman 2021             | Impact of Vitamin D Therapy on the Progress COVID-19: Six Weeks Follow-Up Study of Vitamin D Deficient Elderly Diabetes Patients                                                                                                  | Not a randomized trial    |
| Khamis 2021              | Convalescent Plasma Therapy in Critically Ill COVID-19 Patients: An Open Label Trial                                                                                                                                              | Not a randomized trial    |
| Kerekes 2021             | Differential Effect of Vaccine Effectiveness and Safety on COVID-19 Vaccine Acceptance across Socioeconomic Groups in an International Sample                                                                                     | Not a randomized trial    |
| Alsuwaidan 2021          | The utilization of hydroxychloroquine to reduce the main signs and symptoms of COVID-19 patients, a cross-sectional study                                                                                                         | Not a randomized trial    |
| Mateo 2020               | Remdesivir Reduces Time to Recovery in Adults Hospitalized with COVID-19: A Meaningful Step in Therapeutic Discovery                                                                                                              | Not a randomized trial    |
| Lakkireddy 2021          | Author Correction: Impact of daily high dose oral vitamin D therapy on the inflammatory markers in patients with COVID 19 disease (Scientific Reports, (2021), 11, 1, (10641), 10.1038/s41598-021-90189-4)                        | Not a randomized trial    |
| Wenban 2021              | Dexamethasone treatment may mitigate adverse effects of vitamin D deficiency in hospitalized Covid-19 patients.                                                                                                                   | Not a randomized trial    |
| Kalil 2021               | Baricitinib: the first immunomodulatory treatment to reduce COVID-19 mortality in a placebo-controlled trial.                                                                                                                     | Not a randomized trial    |
| Al-Kuraishy 2021         | Impact of Sitagliptin in Non-Diabetic Covid-19 Patients.                                                                                                                                                                          | Not a randomized trial    |
| Kravchenko 2021          | Covid-19 in pregnancy: Special characteristics of the course and rational therapy with recombinant interferon alfa-2b formulations                                                                                                | Not a randomized trial    |
| Vercueil 2021            | Efficacy of Serotherapy on an N501Y Variant of SARS-CoV-2 in a Patient With Chronic Lymphocytic Leukemia                                                                                                                          | Not a randomized trial    |
| Yadav 2021               | Humoral Response to One and Two Doses of ChAdOx1-S Vaccine in Patients on Hemodialysis                                                                                                                                            | Not a randomized trial    |
| Pfeifer 2021             | Phase I study in healthy participants to evaluate safety, tolerability, and pharmacokinetics of inhaled nezulcinitib, a potential treatment for COVID-19.                                                                         | Wrong population          |
| VanWyk 2021              | Switching to dolutegravir/lamivudine (DTG/3TC) fixed-dose combination (FDC) is non-inferior to continuing a tenofovir alafenamide (TAF)-based regimen (TBR) in maintaining virological suppression through 96 weeks (TANGO study) | Wrong population          |
| Li 2021                  | Safety, tolerability, pharmacokinetics and immunogenicity of a monoclonal antibody (SCTA01) targeting SARS-CoV-2 in healthy adults: A randomized, double-blind, placebo-controlled, phase I study.                                | Wrong population          |
| Borujerdi 2022           | Effects of Iranian Polyherbal Syrup (Zufa syrup) on oxygen saturation and clinical symptoms in suspected patients with COVID-19: a triple-blinded, randomized, placebo-controlled trial                                           | Nutrition and supplements |
| PereMillat-Martinez 2021 | Convalescent plasma for outpatients with early COVID-19                                                                                                                                                                           | Others                    |
| Helsingen 2021           | Covid-19 transmission in fitness centers in Norway - a randomized trial                                                                                                                                                           | Others                    |
| Hess 2021                | Whole-Lung Low-Dose Radiation Therapy (LD-RT) for Non-Intubated Oxygen-Dependent Patients with COVID-19-Related Pneumonia Receiving Dexamethasone and/or Remdesivir                                                               | Others                    |
| Hess 2021                | Reduced Intubation Rates Following Whole-Lung Low-Dose Radiation Therapy (LD-RT) in Patients With COVID-19-Related Pneumonia                                                                                                      | Others                    |

|                        |                                                                                                                                                                                                                                                                 |                                                        |
|------------------------|-----------------------------------------------------------------------------------------------------------------------------------------------------------------------------------------------------------------------------------------------------------------|--------------------------------------------------------|
| Dominguez-Nicolas 2021 | Low-field thoracic magnetic stimulation increases peripheral oxygen saturation levels in coronavirus disease (COVID-19) patients: A single-blind, sham-controlled, crossover study.                                                                             | Others                                                 |
| daSilvaSantos 2021     | Beneficial effects of a mouthwash containing an antiviral phthalocyanine derivative on the length of hospital stay for COVID-19: randomised trial.                                                                                                              | Others                                                 |
| CyriiVitug 2021        | ORAL GARGLE OF ETHANOL-BASED MOUTHWASH SOLUTION AND ITS EFFECTS ON ADULT PATIENTS WITH MILD COVID-19 INFECTION: AN OPEN LABEL-RANDOMIZED CONTROLLED TRIAL                                                                                                       | Others                                                 |
| Mollerup 2021          | Effect of PEP flute self-care versus usual care in early covid-19: non-drug, open label, randomised controlled trial in a Danish community setting.                                                                                                             | Oxygen delivery                                        |
| Menga 2021             | Dyspnoea and clinical outcome in critically ill patients receiving noninvasive support for COVID-19 respiratory failure: <i>post hoc</i> analysis of a randomised clinical trial.                                                                               | Oxygen delivery                                        |
| MikeFralick 2021       | Prone positioning of patients with moderate hypoxia due to COVID-19: A multicenter pragmatic randomized trial                                                                                                                                                   | Oxygen delivery                                        |
| Menga 2021             | Dyspnoea and clinical outcome in critically ill patients receiving noninvasive support for COVID-19 respiratory failure: post hoc analysis of a randomised clinical trial                                                                                       | Oxygen delivery                                        |
| Ibarra-Estrada 2021    | Use of Airway Pressure Release Ventilation in Patients With Acute Respiratory Failure Due to Coronavirus Disease 2019: Results of a Single-Center Randomized Controlled Trial                                                                                   | Oxygen delivery                                        |
| Nair 2021              | Comparison of High-Flow Nasal Cannula and Noninvasive Ventilation in Acute Hypoxemic Respiratory Failure Due to Severe COVID-19 Pneumonia.                                                                                                                      | Oxygen delivery                                        |
| Ranasinha 2021         | Inhaled beclomethasone in the treatment of early COVID,Â€19: A placebo,Â€controlled, randomized trial                                                                                                                                                           | Randomized trial with no results (e.g. trial registry) |
| Reis 2021              | A multi-center, adaptive, randomized, platform trial to evaluate the effect of repurposed medicines in outpatients with early coronavirus disease 2019 (COVID-19) and high-risk for complications: the TOGETHER master trial protocol (preprint)                | Randomized trial with no results (e.g. trial registry) |
| GonzvÂ°lez 2021        | A multicenter, open-label, randomized, proof-of-concept phase ii clinical trial to Assess the efficacy and safety of icanatib in patients infected with sars-cov-2 (covid-19) And admitted to hospital units without invasive mechanical ventilation. StudyPro  | Randomized trial with no results (e.g. trial registry) |
| Mera-Cordero 2021      | Double-blind Placebo-controlled Randomized Clinical Trial to Assess the Efficacy of Montelukast in Mild to Moderate Respiratory Symptoms of Patients With Long COVID E-SPERANZA COVID PROJECT Study Protocol (preprint)                                         | Randomized trial with no results (e.g. trial registry) |
| Comenducci 2021        | Glenzocimab, a novel antiplatelet therapy in COVID-19 related acute respiratory distress syndrome (ARDS): the garden study, a phase 2 clinical trial                                                                                                            | Randomized trial with no results (e.g. trial registry) |
| Hu 2021                | Efficacy and safety of Lianhua Qingwen capsules, a repurposed Chinese herb, in patients with Coronavirus disease 2019: A multicenter, prospective, randomized controlled trial [Phytomedicine 85 (2021) 153242]                                                 | Traditional Chinese or alternative medicine            |
| Chen 2021              | Efficacy and safety of Bufei Huoxue capsules in the management of convalescent patients with COVID-19 infection: A multicentre, double-blind, and randomised controlled trial                                                                                   | Traditional Chinese or alternative medicine            |
| Hu 2021                | Efficacy and Safety of Lianhuaqingwen Capsules, a repurposed Chinese Herb, in Patients with Coronavirus disease 2019: A multicenter, prospective, randomized controlled trial [Phytomedicine 85 (2021) 153242].                                                 | Traditional Chinese or alternative medicine            |
| Zeng 2021              | Therapeutic Effects of Traditional Chinese Medicine (Maxingshigan-Weijing Decoction) on COVID-19: an open-label randomized controlled trial                                                                                                                     | Traditional Chinese or alternative medicine            |
| Zeng 2021              | [Moxibustion on mental disorder in close contacts of coronavirus disease 2019: a randomized controlled trial].                                                                                                                                                  | Traditional Chinese or alternative medicine            |
| Natarajan 2021         | Kabasura Kudineer (KSK), a poly-herbal Siddha medicine, reduced SARS-CoV-2 viral load in asymptomatic COVID-19 individuals as compared to vitamin C and zinc supplementation: findings from a prospective, exploratory, open-labeled, comparative, randomized c | Traditional Chinese or alternative medicine            |
| Hu 2021                | Cinobufacini Improves the Respiratory Function of Severe COVID-19 Patients                                                                                                                                                                                      | Traditional Chinese or alternative medicine            |
| An 2021                | Efficacy of Jinhua Qinggan Granules Combined With Western Medicine in the Treatment of Confirmed and Suspected COVID-19: A Randomized Controlled Trial.                                                                                                         | Traditional Chinese or alternative medicine            |

|                        |                                                                                                                                                                                                                                             |                        |
|------------------------|---------------------------------------------------------------------------------------------------------------------------------------------------------------------------------------------------------------------------------------------|------------------------|
| Kumar 2021             | Neutralization of SARS-CoV-2 Variants in Transplant Recipients After Two and Three Doses of mRNA-1273 Vaccine : Secondary Analysis of a Randomized Trial.                                                                                   | Vaccine                |
| Kremsner 2021          | Efficacy and safety of the CVnCoV SARS-CoV-2 mRNA vaccine candidate in ten countries in Europe and Latin America (HERALD): a randomised, observer-blinded, placebo-controlled, phase 2b/3 trial                                             | Vaccine                |
| Ramos-Martinez 2021    | Effect of bcg revaccination on occupationally exposed medical personnel vaccinated against sars-cov-2                                                                                                                                       | Vaccine                |
| Toback 2021            | Safety, immunogenicity, and efficacy of a COVID-19 vaccine (NVX-CoV2373) co-administered with seasonal influenza vaccines: an exploratory substudy of a randomised, observer-blinded, placebo-controlled, phase 3 trial                     | Vaccine                |
| Lazarus 2021           | Safety and immunogenicity of concomitant administration of COVID-19 vaccines (ChAdOx1 or BNT162b2) with seasonal influenza vaccines in adults in the UK (ComFluCOV): a multicentre, randomised, controlled, phase 4 trial                   | Vaccine                |
| Ella 2021              | Efficacy, safety, and lot-to-lot immunogenicity of an inactivated SARS-CoV-2 vaccine (BBV152): interim results of a randomised, double-blind, controlled, phase 3 trial                                                                     | Vaccine                |
| Granwehr 2021          | BioNTech/Pfizer vaccine after Oxford/AZ vaccine increased immune response vs. no second vaccine                                                                                                                                             | Vaccine                |
| Asano 2021             | Immunogenicity and safety of AZD1222 (ChAdOx1 nCoV-19) against SARS-CoV-2 in Japan: A double-blind, randomized controlled phase 1/2 trial                                                                                                   | Vaccine                |
| Feng 2021              | Correlates of protection against symptomatic and asymptomatic SARS-CoV-2 infection.                                                                                                                                                         | Vaccine                |
| SaranyaSridhar 2021    | Safety and immunogenicity of a SARS-CoV-2 recombinant protein vaccine with AS03 adjuvant in healthy adults: interim findings from a phase 2, randomised, dose-finding, multi-centre study                                                   | Vaccine                |
| Wise 2021              | Vaccinating against covid and flu at same time is safe, study shows                                                                                                                                                                         | Vaccine                |
| Thomas 2021            | COVID-19 vaccine in participants (ptcps) with cancer: Subgroup analysis of efficacy/safety from a global phase III randomized trial of the BNT162b2 (tozinameran) mRNA vaccine                                                              | Vaccine                |
| Lisa 2021              | Efficacy and Safety of NVX-CoV2373 in Adults in the United States and Mexico                                                                                                                                                                | Vaccine                |
| KimberlyAKraynyak 2021 | SARS-CoV-2 DNA Vaccine INO-4800 Induces Durable Immune Responses Capable of Being Boosted in a Phase 1 Open-Label Trial                                                                                                                     | Vaccine                |
| Formica 2021           | Different dose regimens of a SARS-CoV-2 recombinant spike protein vaccine (NVX-CoV2373) in younger and older adults: A phase 2 randomized placebo-controlled trial                                                                          | Vaccine                |
| Clemens 2021           | Efficacy of ChAdOx1 nCoV-19 (AZD1222) vaccine against SARS-CoV-2 lineages circulating in Brazil                                                                                                                                             | Vaccine                |
| Lazarus 2021           | The Safety and Immunogenicity of Concomitant Administration of COVID-19 Vaccines (ChAdOx1 or BNT162b2) with Seasonal Influenza Vaccines in Adults: A Phase IV, Multicentre Randomised Controlled Trial with Blinding (ComFluCOV) (preprint) | Vaccine                |
| Falsey 2021            | Phase 3 Safety and Efficacy of AZD1222 (ChAdOx1 nCoV-19) Covid-19 Vaccine.                                                                                                                                                                  | Vaccine                |
| Bueno 2021             | Safety and Immunogenicity of an Inactivated SARS-CoV-2 Vaccine in a Subgroup of Healthy Adults in Chile.                                                                                                                                    | Vaccine                |
| Fadlyana 2021          | A Phase III, Observer-blind, Randomized, Placebo-controlled Study of the Efficacy, Safety, and Immunogenicity of SARS-CoV-2 Inactivated Vaccine in Healthy Adults Aged 18,Ä59 Years: An Interim Analysis in Indonesia                       | Vaccine                |
| ElSahly 2021           | Efficacy of the mRNA-1273 SARS-CoV-2 Vaccine at Completion of Blinded Phase.                                                                                                                                                                | Vaccine                |
| LindseyRBaden 2021     | Covid-19 in the Phase 3 Trial of mRNA-1273 During the Delta-variant Surge                                                                                                                                                                   | Vaccine                |
| Xia 2021               | Safety and immunogenicity of an inactivated COVID-19 vaccine, BBIBP-CorV, in people younger than 18 years: a randomised, double-blind, controlled, phase 1/2 trial                                                                          | Vaccine                |
| Thomas 2021            | Safety and Efficacy of the BNT162b2 mRNA Covid-19 Vaccine through 6 Months.                                                                                                                                                                 | Vaccine                |
| Richmond 2021          | Persistence of the immune responses and cross-neutralizing activity with Variants of Concern following two doses of adjuvanted SCB-2019 COVID-19 vaccine.                                                                                   | Vaccine                |
| Mukherjee 2021         | Homeopathic Medicines Used as Prophylaxis in Kolkata during the COVID-19 Pandemic: A Community-Based, Cluster-Randomized Trial                                                                                                              | Inaccessible full text |

|                |                                                                                                                                                                                                                                     |                                                        |
|----------------|-------------------------------------------------------------------------------------------------------------------------------------------------------------------------------------------------------------------------------------|--------------------------------------------------------|
| Stockmann 2021 | Cytoresc, or cytosorb for COVID-19 patients with vasoplegic shock: A prospective randomized pilot study                                                                                                                             | Inaccessible full text                                 |
| Resende 2021   | BLOCKADE OF INTERLEUKIN SEVENTEEN (IL-17A) IN HOSPITALIZED COVID-19 PATIENTS - THE BISHOP STUDY                                                                                                                                     | Inaccessible full text                                 |
| Bonifácio 2021 | Efficacy of ixekizumab vs. IL-2 vs. colchicine vs. Standard of care for the treatment of hospitalized patients with COVID-19: Preliminary results of a randomized clinical trial (struck: Survival trial using cytokine inhibitors) | Inaccessible full text                                 |
| Zupanets 2021  | Quercetin effectiveness in patients with COVID-19 associated pneumonia                                                                                                                                                              | Inaccessible full text                                 |
| Not reported   | Efficacy and Safety of Ivermectin for Treatment and prophylaxis of COVID-19 Pandemic                                                                                                                                                | Removed from preprint server                           |
| Vříkmen 2021   | Comparison of two different lung ultrasound imaging protocols in COVID-19 pneumonia.                                                                                                                                                | Diagnostic imaging                                     |
| Shogenova 2021 | KalHydrogen inhalation in rehabilitation program of the medical staff recovered from COVID-19.                                                                                                                                      | Wrong population                                       |
| Ramos 2021     | Effect of rivaroxaban (10mg) versus observation on the risk of thrombosis at discharge in individuals with covid-19                                                                                                                 | Wrong population                                       |
| Murray 2021    | Design and implementation of an international, multi-arm, multi-stage platform master protocol for trials of novel SARS-CoV-2 antiviral agents: Therapeutics for Inpatients with COVID-19 (TICO/ACTIV-3).                           | Randomized trial with no results (e.g. trial registry) |
| Foged 2021     | Fidelity, tolerability and safety of acute high-intensity interval training after hospitalisation for COVID-19: a randomised cross-over trial                                                                                       | Wrong population                                       |

Discrepancies between preprint and peer-reviewed publications

| Study                                   | Differences between study preprint and peer-reviewed publications                                                                                                                                                                                                                                                                                                                                                                                                                                                                                                                                                                                                                                                                                                                                                                                |
|-----------------------------------------|--------------------------------------------------------------------------------------------------------------------------------------------------------------------------------------------------------------------------------------------------------------------------------------------------------------------------------------------------------------------------------------------------------------------------------------------------------------------------------------------------------------------------------------------------------------------------------------------------------------------------------------------------------------------------------------------------------------------------------------------------------------------------------------------------------------------------------------------------|
| Abdelmaksoud, 2020                      | No substantive differences between the preprint and peer-reviewed publications.                                                                                                                                                                                                                                                                                                                                                                                                                                                                                                                                                                                                                                                                                                                                                                  |
| Abdulmir_2, 2021                        | <p>The peer-reviewed report includes a second trial registration.</p> <p>Funding is reported as none in the peer-reviewed report.</p> <p>Age, smoking, respiratory condition, CVD, diabetes, and hypertension are not included in the peer-reviewed report. Since patients included in the preprint and peer-reviewed paper are the same, we retained extractions from the preprint.</p> <p>Follow-up time for mortality is 30 days in the peer-reviewed report.</p> <p>Follow-up time for time to recovery (cure) is no longer reported in the peer-reviewed report.</p> <p>Mean and variance for time to recovery (cure) changed.</p> <p>We rated mortality and time-to-symptom resolution at probably high risk of bias for selective reporting. The peer-reviewed paper includes follow-up times that contradict the trial registration.</p> |
| Ader_1_antiviral drugs, 2021; Discovery | No substantive differences between the preprint and peer-reviewed publications.                                                                                                                                                                                                                                                                                                                                                                                                                                                                                                                                                                                                                                                                                                                                                                  |
| Ader_2_remdesivir, 2021; Discovery      | Viral clearance at day 8 is included in the supplement of the peer-reviewed report but not the preprint.                                                                                                                                                                                                                                                                                                                                                                                                                                                                                                                                                                                                                                                                                                                                         |
| Babalola, 2021                          | <p>The peer-reviewed paper reports that lopinavir-ritonavir is part of standard care.</p> <p>The peer-reviewed paper reports more details on randomization and allocation concealment. Risk of bias due to randomization changed from probably low to definitely low.</p>                                                                                                                                                                                                                                                                                                                                                                                                                                                                                                                                                                        |
| Barratt-Due, 2021; NOR-Solidarity       | No substantive differences between the preprint and peer-reviewed publications.                                                                                                                                                                                                                                                                                                                                                                                                                                                                                                                                                                                                                                                                                                                                                                  |

|                                      |                                                                                                                                                                                                                                                                                                                                                                                                                                                                                                                                                                                                                                                                                                                                                                                                                                                                                                                                                                                                                                                                                                                                                                                                                                                                                                                                                                                                                                                                                                                                                                                                                                                                                |
|--------------------------------------|--------------------------------------------------------------------------------------------------------------------------------------------------------------------------------------------------------------------------------------------------------------------------------------------------------------------------------------------------------------------------------------------------------------------------------------------------------------------------------------------------------------------------------------------------------------------------------------------------------------------------------------------------------------------------------------------------------------------------------------------------------------------------------------------------------------------------------------------------------------------------------------------------------------------------------------------------------------------------------------------------------------------------------------------------------------------------------------------------------------------------------------------------------------------------------------------------------------------------------------------------------------------------------------------------------------------------------------------------------------------------------------------------------------------------------------------------------------------------------------------------------------------------------------------------------------------------------------------------------------------------------------------------------------------------------|
| Blum, 2021                           | <p>Funding source was not reported in the preprint but is reported in the publication.</p> <p>Median age is reported in the publication but not in the preprint.</p> <p>The publication reports oxygen saturation, CRP, d-dimer, and lymphocyte count.</p> <p>The results for adverse events leading to discontinuation changed from the preprint to the publication.</p> <p>The publication reports additional details about the randomization process. The risk of bias for randomization changed from probably low to definitely low.</p>                                                                                                                                                                                                                                                                                                                                                                                                                                                                                                                                                                                                                                                                                                                                                                                                                                                                                                                                                                                                                                                                                                                                   |
| Cadebiani_1, 2021; EAT-DUTA AndroCoV | <p>Baseline oxygen saturation is reported in the peer-reviewed publication but not the preprint.</p> <p>Baseline CRP, d-Dimer, and LDH is reported in the peer-reviewed publication but not the preprint.</p> <p>The peer-reviewed publication reports no events for mortality. The preprint did not explicitly report mortality.</p> <p>The peer-reviewed publication reports no events for mechanical ventilation. The preprint did not explicitly report mechanical ventilation.</p> <p>The peer-reviewed publication reports no events for admission to hospital. The preprint did not explicitly report admission to hospital.</p> <p>The peer-reviewed publication reports no events for adverse events leading to discontinuation. The preprint did not explicitly report adverse events leading to discontinuation.</p> <p>The peer-reviewed publication reports events for viral clearance at day 7. The preprint did not report this outcome.</p> <p>The median time to symptom resolution changed between the preprint and peer-reviewed publications. The peer-reviewed publication only reports this outcome among those analysed, whereas the preprint reports this outcome among the ITT sample. The timepoint of this outcome changed from 60 days in the preprint to 30 days in the peer-reviewed publication.</p> <p>Bias due to missing data was rated at high risk of bias since data in the peer-reviewed publication was only available for 87/130 (66.92%) of the participants.</p> <p>Bias due to competing risk changed from probably low risk of bias to definitely low risk of bias. No deaths were confirmed in the peer-reviewed publication.</p> |

|                                    |                                                                                                                                                                                                                                                                                                                                                                                                                                                                                                                                                                                                                                                                                                                                                                                                                                                                                                                                                                                                                                                                                                                                                                                                                                                                                                                                                                                                                                                                                                                                                                                                                                                                                                                                    |
|------------------------------------|------------------------------------------------------------------------------------------------------------------------------------------------------------------------------------------------------------------------------------------------------------------------------------------------------------------------------------------------------------------------------------------------------------------------------------------------------------------------------------------------------------------------------------------------------------------------------------------------------------------------------------------------------------------------------------------------------------------------------------------------------------------------------------------------------------------------------------------------------------------------------------------------------------------------------------------------------------------------------------------------------------------------------------------------------------------------------------------------------------------------------------------------------------------------------------------------------------------------------------------------------------------------------------------------------------------------------------------------------------------------------------------------------------------------------------------------------------------------------------------------------------------------------------------------------------------------------------------------------------------------------------------------------------------------------------------------------------------------------------|
| Chaccour, 2020;<br>SAINT           | No substantive differences between the preprint and peer-reviewed publications.                                                                                                                                                                                                                                                                                                                                                                                                                                                                                                                                                                                                                                                                                                                                                                                                                                                                                                                                                                                                                                                                                                                                                                                                                                                                                                                                                                                                                                                                                                                                                                                                                                                    |
| Chen_2, 2021                       | The peer-reviewed publication reports mean oxygen saturation levels at baseline whereas the preprint does not.                                                                                                                                                                                                                                                                                                                                                                                                                                                                                                                                                                                                                                                                                                                                                                                                                                                                                                                                                                                                                                                                                                                                                                                                                                                                                                                                                                                                                                                                                                                                                                                                                     |
| Chen_5, 2020                       | No substantive differences between the preprint and peer-reviewed publications.                                                                                                                                                                                                                                                                                                                                                                                                                                                                                                                                                                                                                                                                                                                                                                                                                                                                                                                                                                                                                                                                                                                                                                                                                                                                                                                                                                                                                                                                                                                                                                                                                                                    |
| Corral-Gudino, 2020;<br>GLUCOCOVID | <p>The peer-reviewed publication stratifies reporting for those who were truly randomized and those who were allocated by preference.</p> <p>The peer-reviewed publication mentions that the study terminated early due to decline of new cases.</p> <p>The number analysed in the methylprednisolone group was greater by one in the peer-reviewed publication compared to the preprint.</p> <p>Age, % male, % respiratory condition, % cardiovascular disease, % diabetes, % hypertension changed between the peer-reviewed and preprint publications.</p> <p>The peer-reviewed publication mentions that no patients took immunosuppressants prior to enrolment, whereas the preprint did not.</p> <p>The peer-reviewed publication reports baseline qSOFA score, whereas the preprint did not.</p> <p>Baseline CRP, d-Dimer, and lymphocyte count changed between the peer-reviewed and preprint publications.</p> <p>The peer-reviewed paper reports mortality among the randomized ITT sample. The event numbers and N analysed changed from those extracted from the preprint. The timeframe for mortality was explicitly reported as 28 days in the peer-reviewed publication.</p> <p>The peer-reviewed paper reports mechanical ventilation among the randomized ITT sample. The event numbers and N analysed changed from those extracted from the preprint.</p> <p>The peer-reviewed publication reports length of hospital stay whereas the preprint does not.</p> <p>The peer-reviewed publication reported more information on the method of randomization and allocation concealment compared to the preprint. Therefore, the rating for bias due to randomization changed from probably low to definitely low.</p> |

|                                         |                                                                                                                                                                                                                                                                                                                                                                                                                                                                                                                                                                                                                                                                                                                                                                                                                                        |
|-----------------------------------------|----------------------------------------------------------------------------------------------------------------------------------------------------------------------------------------------------------------------------------------------------------------------------------------------------------------------------------------------------------------------------------------------------------------------------------------------------------------------------------------------------------------------------------------------------------------------------------------------------------------------------------------------------------------------------------------------------------------------------------------------------------------------------------------------------------------------------------------|
| Cruz, 2020;<br>ATENEA-Co-300            | No substantive differences between the preprint and peer-reviewed publications.                                                                                                                                                                                                                                                                                                                                                                                                                                                                                                                                                                                                                                                                                                                                                        |
| Darazam_1,<br>2021;<br>COVIFERON        | The publication reports a name for the trial.<br>The preprint reports no funding but the publication reports institutional funding.                                                                                                                                                                                                                                                                                                                                                                                                                                                                                                                                                                                                                                                                                                    |
| Darazam_2,<br>2021;<br>COVIFERON        | No substantive differences between the preprint and peer-reviewed publications.                                                                                                                                                                                                                                                                                                                                                                                                                                                                                                                                                                                                                                                                                                                                                        |
| Davoudi-<br>Monfared, 2020              | No substantive differences between the preprint and peer-reviewed publications.                                                                                                                                                                                                                                                                                                                                                                                                                                                                                                                                                                                                                                                                                                                                                        |
| Delgado-Enciso,<br>2021; TX-<br>COVID19 | The preprint reports results on the first 84 patients recruited in the trial whereas the publication reports on 214 patients.<br>Age, % male, smokers, respiratory condition, diabetes, hypertension, and oxygen saturation changed.<br>The publication additionally reports the proportion of mild, moderate, and severe patients.<br>The numbers for mortality, admission to hospital, adverse events leading to discontinuation, and time to symptom resolution changed.                                                                                                                                                                                                                                                                                                                                                            |
| Duarte, 2021                            | The preprint reports interim results and the publication reports final trials and so there are changes in baseline characteristics and number of participants randomized.<br>The publication reports that the industry sponsor paid publishing fees.<br>Age, % male, respiratory conditions, cardiovascular conditions, diabetes, and hypertension changed from the preprint to the publication.<br>The proportion of participants receiving supplemental oxygen changed from the preprint to the publication.<br>CRP, D-dimer, LDH, and lymphocyte count changed from the preprint to the publication.<br>Results for mortality, ventilation, adverse events, and duration of hospitalization changed.<br>Risk of bias for missing outcome data for mortality and mechanical ventilation changed from probably low to definitely low. |

|                            |                                                                                                                                                                                                                                                                                                                                                                                                                                                                                                                                                                                                                                                                                                                                                              |
|----------------------------|--------------------------------------------------------------------------------------------------------------------------------------------------------------------------------------------------------------------------------------------------------------------------------------------------------------------------------------------------------------------------------------------------------------------------------------------------------------------------------------------------------------------------------------------------------------------------------------------------------------------------------------------------------------------------------------------------------------------------------------------------------------|
| Dubee, 2021;<br>HYCOVID    | The preprint did not include information on allocation concealment but the publication reported on allocation concealment. The risk of bias due to randomization changed from probably low to definitely low.                                                                                                                                                                                                                                                                                                                                                                                                                                                                                                                                                |
| Feld, 2020                 | The peer-reviewed publication reports % with diabetes and hypertension whereas the preprint does not.                                                                                                                                                                                                                                                                                                                                                                                                                                                                                                                                                                                                                                                        |
| Ghandehari,<br>2021        | The peer-reviewed publication does not report the total number of patients that required ventilation at any point during the trial, however the preprint does. We retained the numbers from the preprint in our analyses.<br>The median duration of hospitalization changed by 0.5 days in the progesterone group from the preprint.                                                                                                                                                                                                                                                                                                                                                                                                                         |
| Gonzalez-Ochoa,<br>2021    | The publication reports baseline characteristics for the ITT population whereas the preprint reports baseline characteristics for the PP population. Age, male, respiratory condition, cardiovascular disease, diabetes, hypertension, and ACE inhibitors/ARB changed.<br>The publication reports ITT outcome data for mortality, ventilation, hospitalization, venous thromboembolism, and duration of hospitalization whereas the preprint reports PP outcome data.<br>Risk of bias changed from high to low for missing outcome data for mortality, ventilation, hospitalization, venous thromboembolism, and duration of hospitalization.                                                                                                                |
| Gordon, 2021;<br>REMAP-CAP | % with respiratory condition, % with cardiovascular condition, and % with diabetes changed.<br>% with confirmed COVID19 changed.<br>% on oxygen therapy at baseline changed.<br>Baseline CRP, d-Dimer, and lymphocyte count changed.<br>The peer-reviewed publication reports number of patients progressing to intubation in patients who are not mechanically vented at baseline. The preprint only reported the composite of death and need for ECMO/ventilation.<br>The peer-reviewed paper reports median (IQR) values for duration of hospitalization, whereas the preprint only included the Kaplan Meier curve.<br>The peer-reviewed paper reports median (IQR) values ICU length of stay, whereas the preprint only included the Kaplan Meier curve |

|                                                     |                                                                                                                                                                                                                                                                                                                                                                                                                                                                                                                                                                                                                                                                                                                                                                                                                                                                                                                                                                                                                                                                                                                                            |
|-----------------------------------------------------|--------------------------------------------------------------------------------------------------------------------------------------------------------------------------------------------------------------------------------------------------------------------------------------------------------------------------------------------------------------------------------------------------------------------------------------------------------------------------------------------------------------------------------------------------------------------------------------------------------------------------------------------------------------------------------------------------------------------------------------------------------------------------------------------------------------------------------------------------------------------------------------------------------------------------------------------------------------------------------------------------------------------------------------------------------------------------------------------------------------------------------------------|
|                                                     | <p>The peer-reviewed paper reports ventilator free days, whereas the preprint does not.</p>                                                                                                                                                                                                                                                                                                                                                                                                                                                                                                                                                                                                                                                                                                                                                                                                                                                                                                                                                                                                                                                |
| Hernandez-Cardenas, 2021                            | <p>No substantive differences between the preprint and peer-reviewed publications.</p>                                                                                                                                                                                                                                                                                                                                                                                                                                                                                                                                                                                                                                                                                                                                                                                                                                                                                                                                                                                                                                                     |
| <p>Horby_dexamethasone, 2020;<br/>RECOVERY</p>      | <p>Number of males/females differ between the preprint and the peer-reviewed publications.</p> <p>Number of patients with positive PCR tests at baseline between the preprint and the peer-reviewed publications.</p> <p>There are more events for mortality and invasive mechanical ventilation in the peer-reviewed publication compared to the preprint.</p> <p>Discrepancies between the preliminary and final report:<br/>% female who are pregnant changed.<br/>% with confirmed COVID-19 at baseline changed.</p> <p>The number of events for mechanical ventilation among those who were not vented at baseline was greater in the final report compared to the preliminary report.</p> <p>Compared to the preliminary report, the final report includes a Kaplan Meier curve on discharge from hospital. The IQR for duration of hospital stay was extracted from the final report.</p> <p>Compared to the preliminary report, the final report includes a Kaplan Meier curve on successful removal from invasive mechanical ventilation. The median and IQR for duration of ventilation was extracted from the final report.</p> |
| <p>Horby_hydroxychloroquine, 2020;<br/>RECOVERY</p> | <p>There is one more male listed in the preprint report.</p> <p>There are more patients with laboratory-confirmed COVID19 in the trial report than in the preprint.</p>                                                                                                                                                                                                                                                                                                                                                                                                                                                                                                                                                                                                                                                                                                                                                                                                                                                                                                                                                                    |

|                                                      |                                                                                                                                                                                                                                                                                                                                                                                                                                                                                                                                                                                                                                                                                                                                                                         |
|------------------------------------------------------|-------------------------------------------------------------------------------------------------------------------------------------------------------------------------------------------------------------------------------------------------------------------------------------------------------------------------------------------------------------------------------------------------------------------------------------------------------------------------------------------------------------------------------------------------------------------------------------------------------------------------------------------------------------------------------------------------------------------------------------------------------------------------|
| <p>Horby_lopinavir-ritonavir, 2020;<br/>RECOVERY</p> | <p>There are more patients with baseline positive PCR results reported in the publication than in the preprint.</p> <p>The published report includes additional mortality events that likely accrued since the preprint was released.</p> <p>The published report includes additional mechanical ventilation events that likely accrued since the preprint was released.</p> <p>The published report includes IQR for duration of hospitalization and the preprint does not.</p>                                                                                                                                                                                                                                                                                        |
| <p>Horby_azithromycin, 2021;<br/>RECOVERY</p>        | <p>% with confirmed COVID-19 at baseline changed.</p> <p>The number of patients randomized to the usual care group was one less in the peer-reviewed publication compared to the preprint.</p> <p>There were more events for mortality at 28 days in the peer-reviewed publication compared to the preprint. The number of patients analyzed for this outcome in the usual care group is one less in the peer-reviewed publication compared to the preprint.</p> <p>There were more events for mechanical ventilation among those not vented at baseline in the peer-reviewed publication compared to the preprint. The number of patients analyzed for this outcome in the usual care group is one less in the peer-reviewed publication compared to the preprint.</p> |
| <p>Horby_tocilizumab, 2021;<br/>RECOVERY</p>         | <p>The number of pregnant patients is greater in the peer-reviewed report compared to the preprint.</p> <p>The number of confirmed COVID-19 cases is greater in the peer-reviewed report compared to the preprint.</p> <p>The number of events for mortality increased from the preprint.</p> <p>The number of events for need for mechanical ventilation increased from the preprint.</p> <p>Median duration of hospital stay in the tocilizumab group changed from 20 (preprint) to 19 days (peer-reviewed).</p>                                                                                                                                                                                                                                                      |
| <p>Horby_aspirin, 2021; RECOVERY</p>                 | <p>No substantive differences between the preprint and peer-reviewed publications.</p>                                                                                                                                                                                                                                                                                                                                                                                                                                                                                                                                                                                                                                                                                  |
| <p>Huang_2, 2020</p>                                 | <p>Adverse events leading to discontinuation was reported in the peer-reviewed publication but not in the preprint.</p>                                                                                                                                                                                                                                                                                                                                                                                                                                                                                                                                                                                                                                                 |

|                                                             |                                                                                                                                                                                                                                                                                                                                                                                                                                                                                                                                      |
|-------------------------------------------------------------|--------------------------------------------------------------------------------------------------------------------------------------------------------------------------------------------------------------------------------------------------------------------------------------------------------------------------------------------------------------------------------------------------------------------------------------------------------------------------------------------------------------------------------------|
| Ivashchenko, 2020                                           | <p>Age, % male, oxygen saturation, and C-reactive protein are reported in the supplementary appendix of the preprint. The peer-reviewed publication does not include a supplementary appendix.</p> <p>% with pregnancy is only reported in the peer-reviewed publication.</p> <p>There was one more event for mortality reported in the peer-reviewed publication compared to the preprint.</p> <p>Adverse events leading to discontinuation was not reported in the preprint but was reported in the peer-reviewed publication.</p> |
| Jagannathan, 2021                                           | <p>The publication reports the proportion of patients with respiratory conditions.</p> <p>The publication reports the proportion of patients with cardiovascular disease.</p> <p>The publication reports the proportion of patients with diabetes.</p> <p>The publication reports the proportion of patients with hypertension.</p>                                                                                                                                                                                                  |
| JamaliMoghada<br>mSiahkali, 2021                            | The publication reports the number of patients with confirmed COVID-19.                                                                                                                                                                                                                                                                                                                                                                                                                                                              |
| Johnston, 2021;<br>The COVID-19<br>Early Treatment<br>Study | No substantive differences between the preprint and peer-reviewed publications.                                                                                                                                                                                                                                                                                                                                                                                                                                                      |
| Kirti, 2021                                                 | No substantive differences between the preprint and peer-reviewed publications.                                                                                                                                                                                                                                                                                                                                                                                                                                                      |
| Krolewiecki, 2021                                           | <p>The trial registration was incorrectly reported in the preprint.</p> <p>The publication additionally reports mortality.</p> <p>Duration of follow-up changed from 7 days to 30 days for mechanical ventilation.</p>                                                                                                                                                                                                                                                                                                               |
| Kumar, 2021                                                 | No substantive differences between the preprint and peer-reviewed publications.                                                                                                                                                                                                                                                                                                                                                                                                                                                      |
| Lawler, 2021;<br>ATTACC, ACTIV-<br>4a, REMAP-CAP            | <p>Peer-reviewed publication reports a higher proportion of patients with severe cardiovascular disease at baseline.</p> <p>Peer-reviewed publication reports one less patient randomized to the usual care group.</p>                                                                                                                                                                                                                                                                                                               |

|                          |                                                                                                                                                                                                                                                                                                                                                                                                                                                                                                                                                                                                                                                                                                                                                                                                                                                                                                                                 |
|--------------------------|---------------------------------------------------------------------------------------------------------------------------------------------------------------------------------------------------------------------------------------------------------------------------------------------------------------------------------------------------------------------------------------------------------------------------------------------------------------------------------------------------------------------------------------------------------------------------------------------------------------------------------------------------------------------------------------------------------------------------------------------------------------------------------------------------------------------------------------------------------------------------------------------------------------------------------|
|                          | Peer-reviewed publication explicitly reports denominator for in-hospital mortality as 1180 (therapeutic heparin) and 1046 (usual care).                                                                                                                                                                                                                                                                                                                                                                                                                                                                                                                                                                                                                                                                                                                                                                                         |
| Lescure, 2021            | No substantive differences between the preprint and peer-reviewed publications.                                                                                                                                                                                                                                                                                                                                                                                                                                                                                                                                                                                                                                                                                                                                                                                                                                                 |
| Li_1, 2020;<br>ELACOI    | No substantive differences between the preprint and peer-reviewed publications.                                                                                                                                                                                                                                                                                                                                                                                                                                                                                                                                                                                                                                                                                                                                                                                                                                                 |
| Li_2, 2021               | The preprint reports duration of hospital stay whereas the peer-reviewed publication does not. The data was retained in our analyses.                                                                                                                                                                                                                                                                                                                                                                                                                                                                                                                                                                                                                                                                                                                                                                                           |
| Liesenborghs, 2021; LAWn | No substantive differences between the preprint and peer-reviewed publications.                                                                                                                                                                                                                                                                                                                                                                                                                                                                                                                                                                                                                                                                                                                                                                                                                                                 |
| Lopes_2, 2021            | <p>Age, % male, % smoker, % with respiratory condition, % with cardiovascular condition, % with diabetes changed between the preprint and peer-reviewed publication.</p> <p>Illness severity score changed.</p> <p>% on oxygen therapy at baseline changed.</p> <p>Quantity of supplemental oxygen at baseline changed.</p> <p>Baseline ALT, d-Dimer, LDH, and lymphocyte count changed.</p> <p>The number of patients randomized changed since the preprint reported interim results only.</p> <p>The number of events for mortality increased in the peer-reviewed publication. The number of patients analysed for this outcome also increased.</p> <p>The number of patients analysed for AEs leading to discontinuation increased.</p> <p>The number of patients analysed for duration of hospital stay increased.</p> <p>Median duration of hospital stay changed between the preprint and peer-reviewed publication.</p> |
| Lopez-Medina, 2021; EPIC | <p>The final report includes one more event for mortality in the placebo group.</p> <p>The final report includes mechanical ventilation at day 8.</p>                                                                                                                                                                                                                                                                                                                                                                                                                                                                                                                                                                                                                                                                                                                                                                           |
| Lou, 2020                | No substantive differences between the preprint and peer-reviewed publications.                                                                                                                                                                                                                                                                                                                                                                                                                                                                                                                                                                                                                                                                                                                                                                                                                                                 |

|                            |                                                                                                                                                                                                                                                                                                                                                                                                                                                                                                                                                 |
|----------------------------|-------------------------------------------------------------------------------------------------------------------------------------------------------------------------------------------------------------------------------------------------------------------------------------------------------------------------------------------------------------------------------------------------------------------------------------------------------------------------------------------------------------------------------------------------|
| Lyngbakken, 2020; NO COVID | <p>The published report includes a link to the protocol on OSF but the preprint does not. The protocol does not change the risk of bias rating of selective reporting.</p> <p>Deaths are reported in the published report but not the preprint.</p> <p>The published report includes a link to a data repository that reports data on MV and duration of hospitalization.</p>                                                                                                                                                                   |
| Marconi, 2021; COV-BARRIER | <p>The peer-reviewed report includes 60 day mortality whereas the preprint only includes 28 day mortality.</p> <p>The peer-reviewed report includes more details on randomization. The risk of bias rating changed from probably low to definitely low risk of bias.</p> <p>The peer-reviewed report includes a protocol in the supplementary appendix. We changed selective reporting for outcomes mechanical ventilation, AEs leading to discontinuation, and time to improvement from probably low to definitely low risk of bias.</p>       |
| Mobarak, 2021; DISCOVER    | <p>The peer-reviewed paper reports proportion of patients on oxygen therapy at baseline. The preprint does not.</p> <p>The peer-reviewed paper reports more events for all-cause mortality than the preprint: 71/541 (sofosbuvir-daclatasvir) and 62/542 (placebo) vs 68/541 (sofosbuvir-daclatasvir) and 60/542 (placebo).</p> <p>The peer-reviewed paper reports fewer events for mechanical ventilation than the preprint: 13/541 (sofosbuvir-daclatasvir) and 10/542 (placebo) vs 18/541 (sofosbuvir-daclatasvir) and 12/542 (placebo).</p> |
| Mohan, 2021; RIVET-COV     | <p>No substantive differences between the preprint and peer-reviewed publications.</p>                                                                                                                                                                                                                                                                                                                                                                                                                                                          |

|                              |                                                                                                                                                                                                                                                                                                                                                                                                                                                                                                                                                                                                                                                                                                                                                                                                                                                                                                                                                                                                                                                                                                                                                                                                                                                                                                                                                                                                                                                                                   |
|------------------------------|-----------------------------------------------------------------------------------------------------------------------------------------------------------------------------------------------------------------------------------------------------------------------------------------------------------------------------------------------------------------------------------------------------------------------------------------------------------------------------------------------------------------------------------------------------------------------------------------------------------------------------------------------------------------------------------------------------------------------------------------------------------------------------------------------------------------------------------------------------------------------------------------------------------------------------------------------------------------------------------------------------------------------------------------------------------------------------------------------------------------------------------------------------------------------------------------------------------------------------------------------------------------------------------------------------------------------------------------------------------------------------------------------------------------------------------------------------------------------------------|
| Murai, 2021                  | <p>Age, % male, % with COPD and asthma, % with cardiovascular disease, % with diabetes, % with hypertension changed.</p> <p>% with confirmed COVID-19 was not reported in the preprint but was reported in the peer-reviewed publication.</p> <p>% on oxygen therapy and non-invasive mechanical ventilation at baseline changed.</p> <p>Baseline CRP, d-Dimer, and lymphocyte count changed.</p> <p>The number of events for mortality in the vitamin D3 arm increased by 1 in the peer-reviewed publication. The number of patients analysed for this outcome changed between the preprint and peer-reviewed publication.</p> <p>The number of events for mechanical ventilation in the vitamin D3 arm increased by 1 in the peer-reviewed publication. The number of patients analysed for this outcome changed between the preprint and peer-reviewed publication.</p> <p>The number of patients analysed for duration of hospital stay changed between the preprint and peer-reviewed publication. The variability reported in the preprint was a 95% CI whereas the peer-reviewed publication reported an IQR.</p> <p>The number of patients analysed for duration of mechanical ventilation changed in the vitamin D3 arm. The peer-reviewed publication reports a mean whereas the preprint only included a Kaplan Meier curve from which we could extract a median. The variability for this outcome changed between the preprint and the peer-reviewed publication.</p> |
| Nojomi, 2020                 | <p>The publication describes a method for allocation concealment and the preprint does not. We revised the risk of bias from probably high to definitely low risk of bias for allocation concealment.</p>                                                                                                                                                                                                                                                                                                                                                                                                                                                                                                                                                                                                                                                                                                                                                                                                                                                                                                                                                                                                                                                                                                                                                                                                                                                                         |
| Pan, 2020; SOLIDARITY        | <p>Funding description mentions that drugs were donated by pharmaceutical companies in the peer-reviewed publication.</p> <p>Number of events for mechanical ventilation in the comparison of lopinavir-ritonavir and standard care is greater in the peer-reviewed publication compared to the preprint.</p>                                                                                                                                                                                                                                                                                                                                                                                                                                                                                                                                                                                                                                                                                                                                                                                                                                                                                                                                                                                                                                                                                                                                                                     |
| Panda, 2021; SEV COVID Trial | <p>No substantive differences between the preprint and peer-reviewed publications.</p>                                                                                                                                                                                                                                                                                                                                                                                                                                                                                                                                                                                                                                                                                                                                                                                                                                                                                                                                                                                                                                                                                                                                                                                                                                                                                                                                                                                            |

|                           |                                                                                                                                                                                                                                                                                                                                                                                                                                                                                |
|---------------------------|--------------------------------------------------------------------------------------------------------------------------------------------------------------------------------------------------------------------------------------------------------------------------------------------------------------------------------------------------------------------------------------------------------------------------------------------------------------------------------|
| Perepu, 2021              | No substantive differences between the preprint and peer-reviewed publications.                                                                                                                                                                                                                                                                                                                                                                                                |
| Perlin, 2021              | The peer-reviewed publication additionally reports industry funding.<br>The peer-reviewed publication additionally reports proportion of patients receiving non-invasive ventilation at baseline.<br>The peer-reviewed publication additionally reports AEs leading to discontinuation: 3/40 (CERC-002) and 8/42 (placebo).                                                                                                                                                    |
| Puskarich, 2021           | The publication reports on mortality, ventilation, and admission to hospital that were not reported in the preprint.                                                                                                                                                                                                                                                                                                                                                           |
| Ramachandran, 2021        | No substantive differences between the preprint and peer-reviewed publications.                                                                                                                                                                                                                                                                                                                                                                                                |
| Ramakrishnan, 2021; STOIC | The publication additionally reports patients with asthma at baseline.<br>The publication additionally reports patients with cardiovascular disease at baseline.<br>The publication additionally reports patients with diabetes at baseline.<br>The publication additionally reports 95% confidence intervals for time to symptom resolution. For the preprint, interquartile ranges were extracted from the KM curve.                                                         |
| Reis_2, 2021; TOGETHER    | N randomized changed from the preprint to the publication.<br>% male, smokers, respiratory condition, cvd, diabetes, and hypertension changed from the preprint to the publication.<br>The publication reports mechanical ventilation, which was not reported in the preprint.<br>Results for mortality, hospitalization, viral clearance, duration of hospitalization, duration of ventilation, and time to viral clearance changed between the preprint and the publication. |
| Rocco, 2020               | No substantive differences between the preprint and peer-reviewed publications.                                                                                                                                                                                                                                                                                                                                                                                                |

|                                        |                                                                                                                                                                                                                                                                                                                                                                                                                                                                                 |
|----------------------------------------|---------------------------------------------------------------------------------------------------------------------------------------------------------------------------------------------------------------------------------------------------------------------------------------------------------------------------------------------------------------------------------------------------------------------------------------------------------------------------------|
| Roostaei<br>Firozabad, 2021            | <p>The publication reported baseline respiratory condition and cardiovascular disease, while the preprint did not.</p> <p>The preprint reported that there were no cases of diabetes or hypertension whereas the publication reported cases of diabetes and hypertension.</p> <p>The publication reported the percentage of participants with confirmed COVID-19, while the preprint did not</p> <p>The publication reports oxygen saturation, while the preprint does not.</p> |
| Rosas, 2021;<br>COVACTA                | <p>The peer-reviewed publication included the study protocol in the appendix. Therefore, the risk of bias rating for selective reporting changed from probably low to definitely low risk of bias for the outcomes mechanical ventilation, adverse events leading to discontinuation, and ICU length of stay.</p>                                                                                                                                                               |
| Salama, 2020;<br>EMPACTA               | <p>Baseline CRP and d-Dimer is different between the preprint and peer-reviewed publications.</p> <p>The peer-reviewed paper reports on mechanical ventilation as an outcome whereas the preprint does not.</p>                                                                                                                                                                                                                                                                 |
| Sigamani, 2020                         | <p>No substantive differences between the preprint and peer-reviewed publications.</p>                                                                                                                                                                                                                                                                                                                                                                                          |
| Silva Borba,<br>2020;<br>CloroCovid-19 | <p>No substantive differences between the preprint and peer-reviewed publications.</p>                                                                                                                                                                                                                                                                                                                                                                                          |
| Tang_1, 2020                           | <p>Mortality was reported in the peer-reviewed publication but not in the preprint.</p>                                                                                                                                                                                                                                                                                                                                                                                         |
| Tardif, 2021;<br>COLCORONA             | <p>The publication additionally lists an institutional source of funding that was not specified in the preprint.</p> <p>The publication lists Greece as a country in which the trial was conducted.</p> <p>Age changed from the preprint to publication.</p>                                                                                                                                                                                                                    |
| Tornling, 2021;<br>ATTRACT             | <p>Compared to the preprint, the peer-reviewed publication reports a greater proportion of patients on supplemental oxygen at baseline (71.70% versus 57.55%).</p> <p>Baseline CRP levels changed.</p> <p>The peer-reviewed report includes further details on allocation</p>                                                                                                                                                                                                   |

|                                              |                                                                                                                                                                                                                                                                                                                                                                                                                                                                                                                                                                                                                                                                                                                                                                                                                                                                                                                                                                                                                                                                                                                                                   |
|----------------------------------------------|---------------------------------------------------------------------------------------------------------------------------------------------------------------------------------------------------------------------------------------------------------------------------------------------------------------------------------------------------------------------------------------------------------------------------------------------------------------------------------------------------------------------------------------------------------------------------------------------------------------------------------------------------------------------------------------------------------------------------------------------------------------------------------------------------------------------------------------------------------------------------------------------------------------------------------------------------------------------------------------------------------------------------------------------------------------------------------------------------------------------------------------------------|
|                                              | concealment. We changed the risk of bias rating for allocation concealment from probably low to definitely low.                                                                                                                                                                                                                                                                                                                                                                                                                                                                                                                                                                                                                                                                                                                                                                                                                                                                                                                                                                                                                                   |
| Trieu, 2021;<br>ARTI-19                      | No substantive differences between the preprint and peer-reviewed publications.                                                                                                                                                                                                                                                                                                                                                                                                                                                                                                                                                                                                                                                                                                                                                                                                                                                                                                                                                                                                                                                                   |
| Vlaar, 2020;<br>PANAMO                       | The peer-reviewed publication describes concealed allocation whereas the preprint did not report this detail. Bias due to randomization changed from probably high to definitely low.                                                                                                                                                                                                                                                                                                                                                                                                                                                                                                                                                                                                                                                                                                                                                                                                                                                                                                                                                             |
| Wang_4, 2020                                 | No substantive differences between the preprint and peer-reviewed publications.                                                                                                                                                                                                                                                                                                                                                                                                                                                                                                                                                                                                                                                                                                                                                                                                                                                                                                                                                                                                                                                                   |
| Yu_inhaled<br>budesonide,<br>2021; PRINCIPLE | <p>Age, % male, current or unspecified smokers, former smokers, respiratory condition, cardiovascular disease, diabetes, hypertension, ACE inhibitors/ARB use, confirmed COVID-19, and N randomized changed between the peer-reviewed paper and preprint.</p> <p>The peer-reviewed paper reports secondary outcomes among those who were concurrently randomized, irrespective of SARS-COV-2 status (Table S2). The preprint reports secondary outcomes among those who were concurrently randomized, but SARS-COV-2 positive.</p> <p>The peer-reviewed paper reports mortality at 28 days. The preprint only reports events for mortality and/or hospitalization at 28 days.</p> <p>The peer-reviewed paper reports duration of hospital stay and admission to hospital. The preprint did not report duration of hospital stay.</p> <p>We changed our risk of bias rating for selective reporting for mechanical ventilation to definitely low risk of bias. Initially data was only presented among those who were SARS-COV-2 positive. The peer-reviewed paper, however, reports data for all patients, irrespective of SARS-COV-2 status.</p> |

|               |                                                                                                                                                                                                                                                                                                                                                                                                                                                                                                                                                                                                                                                                                                                                                                                                                                                                                                                                                                              |
|---------------|------------------------------------------------------------------------------------------------------------------------------------------------------------------------------------------------------------------------------------------------------------------------------------------------------------------------------------------------------------------------------------------------------------------------------------------------------------------------------------------------------------------------------------------------------------------------------------------------------------------------------------------------------------------------------------------------------------------------------------------------------------------------------------------------------------------------------------------------------------------------------------------------------------------------------------------------------------------------------|
| Zhang_1, 2021 | <p>Age, % male, % respiratory condition, % cardiovascular disease, % diabetes, % hypertension, and % on oxygen therapy and mechanical ventilation at baseline changed.</p> <p>The number of patients analysed for the outcome mechanical ventilation between the preprint and the peer-reviewed publication.</p> <p>Length of hospital stay and the number of patients analysed for the outcome changed between the preprint and the peer-reviewed publication.</p> <p>Ventilator-free days and the number of patients analysed for the outcome changed between the preprint and the peer-reviewed publication.</p> <p>The number of patients analysed for the outcome duration of mechanical ventilation changed between the preprint and the peer-reviewed publication.</p> <p>The peer-reviewed paper explicitly mentioned allocation concealment whereas the preprint did not. The rating for bias due to randomization changed from probably low to definitely low.</p> |
| Zheng, 2020   | <p>Chronic bronchitis is only reported in the peer-reviewed publication.</p> <p>Coronary heart disease is only reported in the peer-reviewed publication.</p> <p>Diabetes is only reported in the peer-reviewed publication.</p> <p>Hypertension is only reported in the peer-reviewed publication.</p> <p>Lymphopenia is only reported in the peer-reviewed publication.</p>                                                                                                                                                                                                                                                                                                                                                                                                                                                                                                                                                                                                |

Risk of bias assessments

| Mortality                           |                                                  |                                                                                            |                                                                           |                                                                                                                                                              |                                                                                                                                                                                   |                                                                                                                                          |                                                                                                                                          |                                                                                                                                                   |       |
|-------------------------------------|--------------------------------------------------|--------------------------------------------------------------------------------------------|---------------------------------------------------------------------------|--------------------------------------------------------------------------------------------------------------------------------------------------------------|-----------------------------------------------------------------------------------------------------------------------------------------------------------------------------------|------------------------------------------------------------------------------------------------------------------------------------------|------------------------------------------------------------------------------------------------------------------------------------------|---------------------------------------------------------------------------------------------------------------------------------------------------|-------|
| Treatment 1                         | Treatment 2                                      | Trial                                                                                      | First author                                                              | Randomization                                                                                                                                                | Deviations from the intended                                                                                                                                                      | Missing outcome data                                                                                                                     | Measurement of outcome                                                                                                                   | Selection of the reported                                                                                                                         | Other |
| (acetyl)cysteine                    | standard care/placebo                            | 13687                                                                                      | de Alencar<br>Taher                                                       | low risk of bias                                                                                                                                             | low risk of bias                                                                                                                                                                  | low risk of bias                                                                                                                         | low risk of bias                                                                                                                         | low risk of bias                                                                                                                                  |       |
|                                     |                                                  | 48051                                                                                      |                                                                           | probably low risk of bias                                                                                                                                    | low risk of bias                                                                                                                                                                  | low risk of bias                                                                                                                         | low risk of bias                                                                                                                         | low risk of bias                                                                                                                                  |       |
| 2-deoxy-D-glucose                   | standard care/placebo                            | 66751a                                                                                     | Narayan Bhatt                                                             | probably high risk of bias                                                                                                                                   | high risk of bias                                                                                                                                                                 | low risk of bias                                                                                                                         | low risk of bias                                                                                                                         | low risk of bias                                                                                                                                  |       |
| 5-alpha reductase inhibitor         | standard care/placebo                            | 19047, 33978, Cadegiani, Cadegi<br>35590                                                   | Cadegiani_1<br>Zarehoseinzade                                             | probably low risk of bias<br>probably low risk of bias                                                                                                       | low risk of bias<br>probably low risk of bias                                                                                                                                     | high risk of bias<br>low risk of bias                                                                                                    | low risk of bias<br>low risk of bias                                                                                                     | probably low risk of bias<br>probably low risk of bias                                                                                            |       |
| ACEi/ARB                            | calcium channel blockers                         | 34054                                                                                      | Nouri-Vaskeh                                                              | low risk of bias                                                                                                                                             | low risk of bias                                                                                                                                                                  | low risk of bias                                                                                                                         | low risk of bias                                                                                                                         | low risk of bias                                                                                                                                  |       |
| ACEi/ARB                            | standard care/placebo                            | 10463, 49441<br>26081<br>27349<br>49084, Puskarich<br>43232<br>48571<br>Puskarich_inpatien | Duarte<br>Cohen<br>Lopes_1<br>Puskarich<br>Gerlak<br>Bauer<br>Puskarich_2 | probably high risk of bias<br>low risk of bias<br>low risk of bias<br>low risk of bias<br>probably high risk of bias<br>low risk of bias<br>low risk of bias | probably high risk of bias<br>probably high risk of bias<br>probably high risk of bias<br>low risk of bias<br>probably high risk of bias<br>high risk of bias<br>low risk of bias | low risk of bias<br>low risk of bias | low risk of bias<br>low risk of bias | low risk of bias<br>probably low risk of bias<br>low risk of bias |       |
| AFO-202 beta glucan                 | beta-glucans                                     | 65044                                                                                      | Raghavan                                                                  | probably high risk of bias                                                                                                                                   | probably high risk of bias                                                                                                                                                        | low risk of bias                                                                                                                         | low risk of bias                                                                                                                         | low risk of bias                                                                                                                                  |       |
| AFO-202 beta glucan                 | standard care/placebo                            | 65044                                                                                      | Raghavan                                                                  | probably high risk of bias                                                                                                                                   | probably high risk of bias                                                                                                                                                        | low risk of bias                                                                                                                         | low risk of bias                                                                                                                         | low risk of bias                                                                                                                                  |       |
| AXL inhibitor                       | standard care/placebo                            | Wilkinson                                                                                  | Wilkinson                                                                 | low risk of bias                                                                                                                                             | probably high risk of bias                                                                                                                                                        | low risk of bias                                                                                                                         | low risk of bias                                                                                                                         | probably high risk of bias                                                                                                                        |       |
| BCG vaccine                         | standard care/placebo                            | 16984                                                                                      | Padmanabhan                                                               | probably low risk of bias                                                                                                                                    | low risk of bias                                                                                                                                                                  | low risk of bias                                                                                                                         | low risk of bias                                                                                                                         | low risk of bias                                                                                                                                  |       |
| CCK-A agonist and CCK-B antagonist  | standard care/placebo                            | Lattmann                                                                                   | Lattmann                                                                  | probably high risk of bias                                                                                                                                   | probably high risk of bias                                                                                                                                                        | low risk of bias                                                                                                                         | low risk of bias                                                                                                                         | low risk of bias                                                                                                                                  |       |
| CERC-002                            | standard care/placebo                            | 38214                                                                                      | Perlin                                                                    | probably low risk of bias                                                                                                                                    | low risk of bias                                                                                                                                                                  | low risk of bias                                                                                                                         | low risk of bias                                                                                                                         | high risk of bias                                                                                                                                 |       |
| GM-CSF inhibitor                    | standard care/placebo                            | Patel_2<br>41974<br>47226a<br>36763                                                        | Patel_2<br>Termesgen<br>Fisher_1<br>Cremer_2                              | probably low risk of bias<br>probably low risk of bias<br>low risk of bias<br>low risk of bias                                                               | low risk of bias<br>low risk of bias<br>probably high risk of bias<br>low risk of bias                                                                                            | low risk of bias<br>low risk of bias<br>low risk of bias<br>low risk of bias                                                             | low risk of bias<br>low risk of bias<br>low risk of bias<br>low risk of bias                                                             | low risk of bias<br>low risk of bias<br>low risk of bias<br>low risk of bias                                                                      |       |
| HIV reverse transcriptase inhibitor | standard care/placebo                            | 8469                                                                                       | Ren                                                                       | probably high risk of bias                                                                                                                                   | probably high risk of bias                                                                                                                                                        | low risk of bias                                                                                                                         | low risk of bias                                                                                                                         | low risk of bias                                                                                                                                  |       |
| IL1 inhibitors                      | standard care/placebo                            | 25655<br>28284<br>Kyriazopoulou<br>54072                                                   | Cremer_1<br>IMUNO-19 Collaborative<br>Kyriazopoulou<br>Caricchio          | probably low risk of bias<br>low risk of bias<br>low risk of bias<br>low risk of bias                                                                        | low risk of bias<br>probably high risk of bias<br>low risk of bias<br>low risk of bias                                                                                            | low risk of bias<br>low risk of bias<br>low risk of bias<br>low risk of bias                                                             | low risk of bias<br>low risk of bias<br>low risk of bias<br>low risk of bias                                                             | low risk of bias<br>low risk of bias<br>low risk of bias<br>low risk of bias                                                                      |       |
| IL6 receptor antagonist             | standard care/placebo                            | 66149                                                                                      | Lomakin                                                                   | low risk of bias                                                                                                                                             | low risk of bias                                                                                                                                                                  | low risk of bias                                                                                                                         | low risk of bias                                                                                                                         | low risk of bias                                                                                                                                  |       |
| IL6 receptor antagonists            | receptor antagonists, corticosteroids (systemic) | SARTRE_EudraCT2020-007RE_EudraCT2020-00203                                                 |                                                                           | low risk of bias                                                                                                                                             | probably high risk of bias                                                                                                                                                        | low risk of bias                                                                                                                         | low risk of bias                                                                                                                         | low risk of bias                                                                                                                                  |       |
| IL6 receptor antagonists            | IL6 receptor antagonists, favipiravir            | 25294, Zhao_1                                                                              | Zhao_1                                                                    | probably high risk of bias                                                                                                                                   | probably high risk of bias                                                                                                                                                        | low risk of bias                                                                                                                         | low risk of bias                                                                                                                         | probably low risk of bias                                                                                                                         |       |
| IL6 receptor antagonists            | corticosteroids (systemic)                       |                                                                                            |                                                                           |                                                                                                                                                              |                                                                                                                                                                                   |                                                                                                                                          |                                                                                                                                          |                                                                                                                                                   |       |

|                                           |                                              |                         |                            |                            |                           |                  |                           |
|-------------------------------------------|----------------------------------------------|-------------------------|----------------------------|----------------------------|---------------------------|------------------|---------------------------|
|                                           | 41237                                        | Rashad_2                | probably high risk of bias | probably high risk of bias | low risk of bias          | low risk of bias | probably low risk of bias |
| IL6 receptor antagonists                  | favipiravir                                  |                         |                            |                            |                           |                  |                           |
|                                           | 25294, Zhao_1                                | Zhao_1                  | probably high risk of bias | probably high risk of bias | low risk of bias          | low risk of bias | probably low risk of bias |
| IL6 receptor antagonists                  | standard care/placebo                        |                         |                            |                            |                           |                  |                           |
|                                           | 33303_B, Rosas                               | Rosas_B                 | low risk of bias           | probably high risk of bias | low risk of bias          | low risk of bias | low risk of bias          |
|                                           | 16128_B                                      | Hermine_B               | low risk of bias           | probably high risk of bias | low risk of bias          | low risk of bias | low risk of bias          |
|                                           | 16127                                        | Salvarani               | low risk of bias           | probably high risk of bias | low risk of bias          | low risk of bias | low risk of bias          |
|                                           | 16340, 23643_B                               | Salama_B                | probably low risk of bias  | low risk of bias           | low risk of bias          | low risk of bias | probably low risk of bias |
|                                           | 27470_B                                      | Veiga_B                 | low risk of bias           | probably high risk of bias | low risk of bias          | low risk of bias | low risk of bias          |
|                                           | 30638, 42046_B                               | Horby_5_B               | low risk of bias           | probably high risk of bias | low risk of bias          | low risk of bias | low risk of bias          |
|                                           | CORIMUNO-SARI-1_NCT041UNO-SARI-1_NCT043240   |                         | low risk of bias           | probably high risk of bias | low risk of bias          | low risk of bias | low risk of bias          |
|                                           | CORIMUNO-SARI-ICU_NCT0UNO-SARI-ICU_NCT043240 |                         | low risk of bias           | probably high risk of bias | probably low risk of bias | low risk of bias | low risk of bias          |
|                                           | CORIMUNO-TOCI-ICU_NCT0UNO-TOCI-ICU_NCT043306 |                         | low risk of bias           | probably high risk of bias | low risk of bias          | low risk of bias | low risk of bias          |
|                                           | COV-AID_NCT0433063OV-AID_NCT04330638_B       |                         | low risk of bias           | probably high risk of bias | low risk of bias          | low risk of bias | low risk of bias          |
|                                           | COVIDOSE2-SSA_NCT044IDOSE2-SSA_NCT0447935    |                         | low risk of bias           | probably high risk of bias | low risk of bias          | low risk of bias | low risk of bias          |
|                                           | COVIDSTORM_NCT0457IDSTORM_NCT04577534        |                         | low risk of bias           | probably high risk of bias | low risk of bias          | low risk of bias | low risk of bias          |
|                                           | COVIT02_NCT044357OVIT02_NCT04435717_B        |                         | low risk of bias           | probably high risk of bias | low risk of bias          | low risk of bias | low risk of bias          |
|                                           | HMO-020-0224_NCT0430-020-0224_NCT0437775     |                         | probably low risk of bias  | low risk of bias           | low risk of bias          | low risk of bias | low risk of bias          |
|                                           | REMDACTA_NCT04409MDACTA_NCT04409262          |                         | low risk of bias           | low risk of bias           | low risk of bias          | low risk of bias | low risk of bias          |
|                                           | SARCOVID_NCT043578RCOVID_NCT04357808         |                         | low risk of bias           | probably high risk of bias | low risk of bias          | low risk of bias | low risk of bias          |
|                                           | SARICOR_EudraCT2020-00DR_EudraCT2020-001531  |                         | low risk of bias           | probably high risk of bias | low risk of bias          | low risk of bias | low risk of bias          |
|                                           | SARTRE_EudraCT2020-00RE_EudraCT2020-00203    |                         | low risk of bias           | probably high risk of bias | low risk of bias          | low risk of bias | low risk of bias          |
|                                           | SARTRE_EudraCT2020-00RE_EudraCT2020-00203    |                         | low risk of bias           | probably high risk of bias | low risk of bias          | low risk of bias | low risk of bias          |
|                                           | TOCOVID_EudraCT2020-0VID_EudraCT2020-00144   |                         | low risk of bias           | probably high risk of bias | low risk of bias          | low risk of bias | low risk of bias          |
|                                           | Rutgers_B                                    | Rutgers_B               | probably high risk of bias | probably high risk of bias | low risk of bias          | low risk of bias | low risk of bias          |
|                                           | Sivapalasingam_P2                            | Sivapalasingam_P2_B     | probably low risk of bias  | low risk of bias           | low risk of bias          | low risk of bias | low risk of bias          |
|                                           | Sivapalasingam_P3                            | Sivapalasingam_P3_C1_B  | probably low risk of bias  | low risk of bias           | low risk of bias          | low risk of bias | low risk of bias          |
| ceptor antagonists, corticosteroids (syst | standard care/placebo                        |                         |                            |                            |                           |                  |                           |
|                                           | 33303_A, Rosas                               | Rosas_A                 | low risk of bias           | probably high risk of bias | low risk of bias          | low risk of bias | low risk of bias          |
|                                           | 16128_A                                      | Hermine_A               | low risk of bias           | probably high risk of bias | low risk of bias          | low risk of bias | low risk of bias          |
|                                           | 16340, 23643_A                               | Salama_A                | probably low risk of bias  | low risk of bias           | low risk of bias          | low risk of bias | probably low risk of bias |
|                                           | 27470_A                                      | Veiga_A                 | low risk of bias           | probably high risk of bias | low risk of bias          | low risk of bias | low risk of bias          |
|                                           | 29298, 34438                                 | Lescure                 | low risk of bias           | low risk of bias           | low risk of bias          | low risk of bias | probably low risk of bias |
|                                           | 30638, 42046_A                               | Horby_5_A               | low risk of bias           | probably high risk of bias | low risk of bias          | low risk of bias | low risk of bias          |
|                                           | 34439                                        | Soin                    | probably high risk of bias | probably high risk of bias | low risk of bias          | low risk of bias | low risk of bias          |
|                                           | CORIMUNO-SARI-1_NCT041UNO-SARI-1_NCT043240   |                         | low risk of bias           | probably high risk of bias | low risk of bias          | low risk of bias | low risk of bias          |
|                                           | CORIMUNO-SARI-ICU_NCT0UNO-SARI-ICU_NCT043240 |                         | low risk of bias           | probably high risk of bias | probably low risk of bias | low risk of bias | low risk of bias          |
|                                           | CORIMUNO-TOCI-ICU_NCT0UNO-TOCI-ICU_NCT043306 |                         | low risk of bias           | probably high risk of bias | low risk of bias          | low risk of bias | low risk of bias          |
|                                           | COV-AID_NCT0433063OV-AID_NCT04330638_A       |                         | low risk of bias           | probably high risk of bias | low risk of bias          | low risk of bias | low risk of bias          |
|                                           | COVIDOSE2-SSA_NCT044IDOSE2-SSA_NCT0447935    |                         | low risk of bias           | probably high risk of bias | low risk of bias          | low risk of bias | low risk of bias          |
|                                           | COVIDSTORM_NCT0457IDSTORM_NCT04577534        |                         | low risk of bias           | probably high risk of bias | low risk of bias          | low risk of bias | low risk of bias          |
|                                           | COVIT02_NCT044357OVIT02_NCT04435717_A        |                         | low risk of bias           | probably high risk of bias | low risk of bias          | low risk of bias | low risk of bias          |
|                                           | HMO-020-0224_NCT0430-020-0224_NCT0437775     |                         | probably low risk of bias  | low risk of bias           | low risk of bias          | low risk of bias | low risk of bias          |
|                                           | REMDACTA_NCT04409MDACTA_NCT04409262          |                         | low risk of bias           | low risk of bias           | low risk of bias          | low risk of bias | low risk of bias          |
|                                           | SARCOVID_NCT043578RCOVID_NCT04357808         |                         | low risk of bias           | probably high risk of bias | low risk of bias          | low risk of bias | low risk of bias          |
|                                           | SARICOR_EudraCT2020-00DR_EudraCT2020-001531  |                         | low risk of bias           | probably high risk of bias | low risk of bias          | low risk of bias | low risk of bias          |
|                                           | SARTRE_EudraCT2020-00RE_EudraCT2020-00203    |                         | low risk of bias           | probably high risk of bias | low risk of bias          | low risk of bias | low risk of bias          |
|                                           | SARTRE_EudraCT2020-00RE_EudraCT2020-00203    |                         | low risk of bias           | probably high risk of bias | low risk of bias          | low risk of bias | low risk of bias          |
|                                           | Rutgers_A                                    | Rutgers_A               | probably high risk of bias | probably high risk of bias | low risk of bias          | low risk of bias | low risk of bias          |
|                                           | Talaschian                                   | Talaschian              | probably low risk of bias  | low risk of bias           | low risk of bias          | low risk of bias | low risk of bias          |
|                                           | Sivapalasingam_P2                            | Sivapalasingam_P2_A     | probably low risk of bias  | low risk of bias           | low risk of bias          | low risk of bias | low risk of bias          |
|                                           | Sivapalasingam_P3                            | Sivapalasingam_P3_C1_A  | probably low risk of bias  | low risk of bias           | low risk of bias          | low risk of bias | low risk of bias          |
|                                           | Sivapalasingam_P3_C2                         | apalasingam_P3_C2_Criti | probably low risk of bias  | low risk of bias           | low risk of bias          | low risk of bias | low risk of bias          |
|                                           | Sivapalasingam_P3_C3                         | apalasingam_P3_C3_Criti | probably low risk of bias  | low risk of bias           | low risk of bias          | low risk of bias | low risk of bias          |
|                                           | Hermine_toci                                 | Hermine_toci            | probably high risk of bias | probably high risk of bias | low risk of bias          | low risk of bias | low risk of bias          |
|                                           | 47857                                        | Hamed                   | probably high risk of bias | probably high risk of bias | low risk of bias          | low risk of bias | probably low risk of bias |
| IL6 receptor antagonists, favipiravir     | favipiravir                                  |                         |                            |                            |                           |                  |                           |
|                                           | 25294, Zhao_1                                | Zhao_1                  | probably high risk of bias | probably high risk of bias | low risk of bias          | low risk of bias | probably low risk of bias |
| Intermediate-dose enoxaparin              | standard care/placebo                        |                         |                            |                            |                           |                  |                           |
|                                           | 52393, Perepu                                | Perepu                  | probably high risk of bias | probably high risk of bias | low risk of bias          | low risk of bias | low risk of bias          |
| JAK inhibitors                            | standard care/placebo                        |                         |                            |                            |                           |                  |                           |
|                                           | 4161                                         | Cao_2                   | low risk of bias           | probably high risk of bias | low risk of bias          | low risk of bias | probably low risk of bias |

|                                           |                                          |                                                                                       |                                                                          |                            |                            |                  |                  |                            |
|-------------------------------------------|------------------------------------------|---------------------------------------------------------------------------------------|--------------------------------------------------------------------------|----------------------------|----------------------------|------------------|------------------|----------------------------|
|                                           |                                          | Kalil<br>62263, Marconi, Marci<br>48879<br>RUXCOVID<br>Ely, WHO_COV-BARRIER_Addendum, | Kalil<br>Marconi<br>Guimarães<br>RUXCOVID<br>Ely                         | low risk of bias           | low risk of bias           | low risk of bias | low risk of bias | low risk of bias           |
|                                           |                                          |                                                                                       |                                                                          | low risk of bias           | low risk of bias           | low risk of bias | low risk of bias | low risk of bias           |
|                                           |                                          |                                                                                       |                                                                          | low risk of bias           | low risk of bias           | low risk of bias | low risk of bias | low risk of bias           |
|                                           |                                          |                                                                                       |                                                                          | low risk of bias           | low risk of bias           | low risk of bias | low risk of bias | low risk of bias           |
|                                           |                                          |                                                                                       |                                                                          | low risk of bias           | low risk of bias           | low risk of bias | low risk of bias | low risk of bias           |
| L-arginine                                | standard care/placebo                    | 64005                                                                                 | Fiorentino                                                               | low risk of bias           | low risk of bias           | low risk of bias | low risk of bias | probably low risk of bias  |
| trate, N-acetylcysteine, nicotinamide rit | standard care/placebo                    | 14670                                                                                 | Altay                                                                    | probably high risk of bias | probably high risk of bias | low risk of bias | low risk of bias | probably low risk of bias  |
| NK1 antagonist                            | standard care/placebo                    | 10086                                                                                 | Mehboob                                                                  | probably high risk of bias | probably high risk of bias | low risk of bias | low risk of bias | probably low risk of bias  |
| NSAID, azithromycin                       | NSAID, azithromycin, corticosteroid      | 64198                                                                                 | Ghanei                                                                   | low risk of bias           | probably high risk of bias | low risk of bias | low risk of bias | low risk of bias           |
| NSAID, azithromycin                       | lopinavir-ritonavir                      | 64198                                                                                 | Ghanei                                                                   | low risk of bias           | probably high risk of bias | low risk of bias | low risk of bias | low risk of bias           |
| NSAID, azithromycin, corticosteroid       | lopinavir-ritonavir                      | 64198                                                                                 | Ghanei                                                                   | low risk of bias           | probably high risk of bias | low risk of bias | low risk of bias | low risk of bias           |
| PF-07321332/ritonavir                     | standard care/placebo                    | EPIC-HR                                                                               | EPIC-HR                                                                  | probably low risk of bias  | low risk of bias           | low risk of bias | low risk of bias | low risk of bias           |
| SGLT2 inhibitors                          | standard care/placebo                    | 54586                                                                                 | Kosiborod                                                                | low risk of bias           | low risk of bias           | low risk of bias | low risk of bias | low risk of bias           |
| TNF inhibitors                            | standard care/placebo                    | 47226b<br>52260                                                                       | Fisher_2<br>Fakharian                                                    | low risk of bias           | probably high risk of bias | low risk of bias | low risk of bias | low risk of bias           |
|                                           |                                          |                                                                                       |                                                                          | probably high risk of bias | probably high risk of bias | low risk of bias | low risk of bias | low risk of bias           |
| alpha lipoic acid                         | standard care/placebo                    | 1284                                                                                  | Zhong                                                                    | low risk of bias           | probably high risk of bias | low risk of bias | low risk of bias | low risk of bias           |
| des, curcuminoids, piperine, resveratrol, | standard care/placebo                    | 67818                                                                                 | Majeed                                                                   | probably low risk of bias  | low risk of bias           | low risk of bias | low risk of bias | probably low risk of bias  |
| angiotensin type 2 receptor agonist       | standard care/placebo                    | 28441                                                                                 | Tornling                                                                 | probably low risk of bias  | low risk of bias           | low risk of bias | low risk of bias | probably low risk of bias  |
| antihepaciviral                           | romycin, hydroxychloroquine, oseltamivir | 44111                                                                                 | Elgohary                                                                 | low risk of bias           | probably high risk of bias | low risk of bias | low risk of bias | probably high risk of bias |
| antihepaciviral                           | lopinavir-ritonavir                      | Yadollahzadeh                                                                         | Yadollahzadeh                                                            | probably high risk of bias | probably high risk of bias | low risk of bias | low risk of bias | low risk of bias           |
| antihepaciviral                           | ravidasvir, sofosbuvir                   | 57630                                                                                 | Abbass                                                                   | low risk of bias           | probably high risk of bias | low risk of bias | low risk of bias | probably low risk of bias  |
| antihepaciviral                           | standard care/placebo                    | 11065<br>Yakoot<br>29517<br>Nourian<br>Mobarak<br>45668<br>Sayad<br>51681<br>57630    | Sadeghi<br>Yakoot<br>Nourian<br>Mobarak<br>Sayad<br>El-Bendary<br>Abbass | probably high risk of bias | high risk of bias          | low risk of bias | low risk of bias | probably high risk of bias |
|                                           |                                          |                                                                                       |                                                                          | low risk of bias           | probably high risk of bias | low risk of bias | low risk of bias | low risk of bias           |
|                                           |                                          |                                                                                       |                                                                          | low risk of bias           | high risk of bias          | low risk of bias | low risk of bias | low risk of bias           |
|                                           |                                          |                                                                                       |                                                                          | probably low risk of bias  | low risk of bias           | low risk of bias | low risk of bias | low risk of bias           |
|                                           |                                          |                                                                                       |                                                                          | low risk of bias           | probably high risk of bias | low risk of bias | low risk of bias | probably low risk of bias  |
|                                           |                                          |                                                                                       |                                                                          | probably high risk of bias | probably high risk of bias | low risk of bias | low risk of bias | probably low risk of bias  |
|                                           |                                          |                                                                                       |                                                                          | low risk of bias           | probably high risk of bias | low risk of bias | low risk of bias | probably low risk of bias  |
| artemisinin                               | standard care/placebo                    |                                                                                       | Trieu                                                                    | probably high risk of bias | probably high risk of bias | low risk of bias | low risk of bias | probably low risk of bias  |
| aspirin                                   | aspirin, atorvastatin                    | Ghati                                                                                 | Ghati                                                                    | probably high risk of bias | probably high risk of bias | low risk of bias | low risk of bias | low risk of bias           |
| aspirin                                   | full-dose anticoagulation                |                                                                                       |                                                                          |                            |                            |                  |                  |                            |

|                                     |                                               |                                                                           |                                                                                                  |                            |                            |                            |                  |                           |
|-------------------------------------|-----------------------------------------------|---------------------------------------------------------------------------|--------------------------------------------------------------------------------------------------|----------------------------|----------------------------|----------------------------|------------------|---------------------------|
|                                     |                                               | 67646                                                                     | Connors                                                                                          | low risk of bias           | low risk of bias           | low risk of bias           | low risk of bias | low risk of bias          |
| aspirin                             | standard care/placebo                         | Ghati Horby_7 67646                                                       | Ghati Horby_7 Connors                                                                            | probably high risk of bias | probably high risk of bias | low risk of bias           | low risk of bias | low risk of bias          |
|                                     |                                               |                                                                           |                                                                                                  | low risk of bias           | probably high risk of bias | low risk of bias           | low risk of bias | low risk of bias          |
|                                     |                                               |                                                                           |                                                                                                  | low risk of bias           | low risk of bias           | low risk of bias           | low risk of bias | low risk of bias          |
| aspirin                             | statins                                       | Ghati                                                                     | Ghati                                                                                            | probably high risk of bias | probably high risk of bias | low risk of bias           | low risk of bias | low risk of bias          |
| aspirin, atorvastatin               | standard care/placebo                         | Ghati                                                                     | Ghati                                                                                            | probably high risk of bias | probably high risk of bias | low risk of bias           | low risk of bias | low risk of bias          |
| aspirin, atorvastatin               | statins                                       | Ghati                                                                     | Ghati                                                                                            | probably high risk of bias | probably high risk of bias | low risk of bias           | low risk of bias | low risk of bias          |
| atazanavir, dolutegravir, ritonavir | lopinavir-ritonavir                           | 53056                                                                     | Kalantari                                                                                        | probably high risk of bias | high risk of bias          | low risk of bias           | low risk of bias | probably low risk of bias |
| azithromycin                        | azithromycin, hydroxychloroquine              | 1_NCT04335552 1_NCT04338698                                               | Axfors_NCT04335552 Axfors_NCT04338698                                                            | probably high risk of bias | probably high risk of bias | probably high risk of bias | low risk of bias | low risk of bias          |
|                                     |                                               |                                                                           |                                                                                                  | probably high risk of bias | probably high risk of bias | probably high risk of bias | low risk of bias | low risk of bias          |
| azithromycin                        | azithromycin, hydroxychloroquine, oseltamivir | 1_NCT04338698                                                             | Axfors_NCT04338698                                                                               | probably high risk of bias | probably high risk of bias | probably high risk of bias | low risk of bias | low risk of bias          |
| azithromycin                        | azithromycin, oseltamivir                     | 1_NCT04338698                                                             | Axfors_NCT04338698                                                                               | probably high risk of bias | probably high risk of bias | probably high risk of bias | low risk of bias | low risk of bias          |
| azithromycin                        | clarithromycin                                | 58017                                                                     | Rashad_3                                                                                         | low risk of bias           | probably high risk of bias | low risk of bias           | low risk of bias | probably low risk of bias |
| azithromycin                        | hydroxychloroquine                            | 1_NCT04335552 18375                                                       | Axfors_NCT04335552 Brown                                                                         | probably high risk of bias | probably high risk of bias | probably high risk of bias | low risk of bias | low risk of bias          |
|                                     |                                               |                                                                           |                                                                                                  | low risk of bias           | high risk of bias          | low risk of bias           | low risk of bias | low risk of bias          |
| azithromycin                        | hydroxychloroquine, oseltamivir               | 1_NCT04338698                                                             | Axfors_NCT04338698                                                                               | probably high risk of bias | probably high risk of bias | probably high risk of bias | low risk of bias | low risk of bias          |
| azithromycin                        | oseltamivir                                   | 1_NCT04338698                                                             | Axfors_NCT04338698                                                                               | probably high risk of bias | probably high risk of bias | probably high risk of bias | low risk of bias | low risk of bias          |
| azithromycin                        | standard care/placebo                         | 11639, 12378 12439 1_NCT04335552 22569, 29803 34434 40804 Oldenburg 58017 | Sekhavati Furtado Axfors_NCT04335552 Horby_4 IPLE Trial Collaborative C Hinks Oldenburg Rashad_3 | probably high risk of bias | probably high risk of bias | low risk of bias           | low risk of bias | probably low risk of bias |
|                                     |                                               |                                                                           |                                                                                                  | low risk of bias           | probably high risk of bias | low risk of bias           | low risk of bias | low risk of bias          |
|                                     |                                               |                                                                           |                                                                                                  | probably high risk of bias | probably high risk of bias | probably high risk of bias | low risk of bias | low risk of bias          |
|                                     |                                               |                                                                           |                                                                                                  | low risk of bias           | probably high risk of bias | low risk of bias           | low risk of bias | low risk of bias          |
|                                     |                                               |                                                                           |                                                                                                  | low risk of bias           | probably high risk of bias | low risk of bias           | low risk of bias | low risk of bias          |
|                                     |                                               |                                                                           |                                                                                                  | low risk of bias           | probably high risk of bias | low risk of bias           | low risk of bias | low risk of bias          |
|                                     |                                               |                                                                           |                                                                                                  | low risk of bias           | low risk of bias           | high risk of bias          | low risk of bias | low risk of bias          |
|                                     |                                               |                                                                           |                                                                                                  | low risk of bias           | probably high risk of bias | low risk of bias           | low risk of bias | probably low risk of bias |
| azithromycin, hydroxychloroquine    | azithromycin, hydroxychloroquine, oseltamivir | 1_NCT04338698                                                             | Axfors_NCT04338698                                                                               | probably high risk of bias | probably high risk of bias | probably high risk of bias | low risk of bias | low risk of bias          |
| azithromycin, hydroxychloroquine    | azithromycin, oseltamivir                     | 1_NCT04338698                                                             | Axfors_NCT04338698                                                                               | probably high risk of bias | probably high risk of bias | probably high risk of bias | low risk of bias | low risk of bias          |
| azithromycin, hydroxychloroquine    | hydroxychloroquine                            | 22152, 9166 1_NCT04335552 20005 33489, Johnston                           | Cavalcanti Axfors_NCT04335552 Omrani Johnston                                                    | low risk of bias           | probably high risk of bias | low risk of bias           | low risk of bias | low risk of bias          |
|                                     |                                               |                                                                           |                                                                                                  | probably high risk of bias | probably high risk of bias | probably high risk of bias | low risk of bias | low risk of bias          |
|                                     |                                               |                                                                           |                                                                                                  | low risk of bias           | low risk of bias           | low risk of bias           | low risk of bias | probably low risk of bias |
|                                     |                                               |                                                                           |                                                                                                  | probably low risk of bias  | low risk of bias           | low risk of bias           | low risk of bias | probably low risk of bias |
| azithromycin, hydroxychloroquine    | hydroxychloroquine, oseltamivir               | 1_NCT04338698                                                             | Axfors_NCT04338698                                                                               | probably high risk of bias | probably high risk of bias | probably high risk of bias | low risk of bias | low risk of bias          |
| azithromycin, hydroxychloroquine    | oseltamivir                                   |                                                                           |                                                                                                  |                            |                            |                            |                  |                           |

|                                            |                                                  |                    |                    |                            |                            |                            |                  |                           |
|--------------------------------------------|--------------------------------------------------|--------------------|--------------------|----------------------------|----------------------------|----------------------------|------------------|---------------------------|
|                                            |                                                  | 1_NCT04338698      | Axfors_NCT04338698 | probably high risk of bias | probably high risk of bias | probably high risk of bias | low risk of bias | low risk of bias          |
| azithromycin, hydroxychloroquine           | standard care/placebo                            |                    |                    |                            |                            |                            |                  |                           |
|                                            |                                                  | 22152, 9166        | Cavalcanti         | low risk of bias           | probably high risk of bias | low risk of bias           | low risk of bias | low risk of bias          |
|                                            |                                                  | 1_NCT04335552      | Axfors_NCT04335552 | probably high risk of bias | probably high risk of bias | probably high risk of bias | low risk of bias | low risk of bias          |
|                                            |                                                  | 20005              | Omrani             | low risk of bias           | low risk of bias           | low risk of bias           | low risk of bias | probably low risk of bias |
|                                            |                                                  | 33489, Johnston    | Johnston           | probably low risk of bias  | low risk of bias           | low risk of bias           | low risk of bias | probably low risk of bias |
|                                            |                                                  | 48002              | Sivapalan          | low risk of bias           | low risk of bias           | low risk of bias           | low risk of bias | low risk of bias          |
|                                            |                                                  | 60017              | Rodrigues          | low risk of bias           | low risk of bias           | low risk of bias           | low risk of bias | probably low risk of bias |
| thromycin, hydroxychloroquine, oseltami    | azithromycin, oseltamivir                        |                    |                    |                            |                            |                            |                  |                           |
|                                            |                                                  | 1_NCT04338698      | Axfors_NCT04338698 | probably high risk of bias | probably high risk of bias | probably high risk of bias | low risk of bias | low risk of bias          |
| thromycin, hydroxychloroquine, oseltami    | hydroxychloroquine, oseltamivir                  |                    |                    |                            |                            |                            |                  |                           |
|                                            |                                                  | 1_NCT04338698      | Axfors_NCT04338698 | probably high risk of bias | probably high risk of bias | probably high risk of bias | low risk of bias | low risk of bias          |
| thromycin, hydroxychloroquine, oseltami    | oseltamivir                                      |                    |                    |                            |                            |                            |                  |                           |
|                                            |                                                  | 1_NCT04338698      | Axfors_NCT04338698 | probably high risk of bias | probably high risk of bias | probably high risk of bias | low risk of bias | low risk of bias          |
| azithromycin, oseltamivir                  | hydroxychloroquine, oseltamivir                  |                    |                    |                            |                            |                            |                  |                           |
|                                            |                                                  | 1_NCT04338698      | Axfors_NCT04338698 | probably high risk of bias | probably high risk of bias | probably high risk of bias | low risk of bias | low risk of bias          |
| azithromycin, oseltamivir                  | oseltamivir                                      |                    |                    |                            |                            |                            |                  |                           |
|                                            |                                                  | 1_NCT04338698      | Axfors_NCT04338698 | probably high risk of bias | probably high risk of bias | probably high risk of bias | low risk of bias | low risk of bias          |
| azithromycin, vitamins                     | favipiravir                                      |                    |                    |                            |                            |                            |                  |                           |
|                                            |                                                  | Khavkina           | Khavkina           | probably high risk of bias | probably high risk of bias | probably low risk of bias  | low risk of bias | probably low risk of bias |
| azithromycin, vitamins                     | hydroxychloroquine, interferon alpha, umifenovir |                    |                    |                            |                            |                            |                  |                           |
|                                            |                                                  | Khavkina           | Khavkina           | probably high risk of bias | probably high risk of bias | probably low risk of bias  | low risk of bias | probably low risk of bias |
| baloxavir marboxil                         | favipiravir                                      |                    |                    |                            |                            |                            |                  |                           |
|                                            |                                                  | 2637, Lou, Lou (1) | Lou                | low risk of bias           | probably high risk of bias | low risk of bias           | low risk of bias | low risk of bias          |
| baloxavir marboxil                         | standard care/placebo                            |                    |                    |                            |                            |                            |                  |                           |
|                                            |                                                  | 2637, Lou, Lou (1) | Lou                | low risk of bias           | probably high risk of bias | low risk of bias           | low risk of bias | low risk of bias          |
| beta-glucans                               | standard care/placebo                            |                    |                    |                            |                            |                            |                  |                           |
|                                            |                                                  | 65044              | Raghavan           | probably high risk of bias | probably high risk of bias | low risk of bias           | low risk of bias | low risk of bias          |
| bradykinin inhibitors                      | standard care/placebo                            |                    |                    |                            |                            |                            |                  |                           |
|                                            |                                                  | 10832              | Mansour            | low risk of bias           | probably high risk of bias | low risk of bias           | low risk of bias | probably low risk of bias |
| bromelain, quercetin, vitamin C            | standard care/placebo                            |                    |                    |                            |                            |                            |                  |                           |
|                                            |                                                  | Onal               | Onal               | probably high risk of bias | high risk of bias          | low risk of bias           | low risk of bias | low risk of bias          |
| bromhexine hydrochloride                   | standard care/placebo                            |                    |                    |                            |                            |                            |                  |                           |
|                                            |                                                  | 12212              | Li_3               | low risk of bias           | probably high risk of bias | low risk of bias           | low risk of bias | high risk of bias         |
|                                            |                                                  | 13888              | Ansarin            | probably high risk of bias | probably high risk of bias | low risk of bias           | low risk of bias | low risk of bias          |
|                                            |                                                  | 35697              | Tolouian           | probably high risk of bias | probably high risk of bias | probably low risk of bias  | low risk of bias | probably low risk of bias |
| cacifiediol                                | standard care/placebo                            |                    |                    |                            |                            |                            |                  |                           |
|                                            |                                                  | 68592              | Maghbooli          | low risk of bias           | low risk of bias           | probably high risk of bias | low risk of bias | low risk of bias          |
| calcium release-activated calcium inhibito | standard care/placebo                            |                    |                    |                            |                            |                            |                  |                           |
|                                            |                                                  | 10964              | Miller             | probably high risk of bias | high risk of bias          | low risk of bias           | low risk of bias | low risk of bias          |
| cannabidiol                                | standard care/placebo                            |                    |                    |                            |                            |                            |                  |                           |
|                                            |                                                  | 66954              | Crippa             | probably low risk of bias  | low risk of bias           | low risk of bias           | low risk of bias | low risk of bias          |
| cefepime                                   | ceftazidime                                      |                    |                    |                            |                            |                            |                  |                           |
|                                            |                                                  | 70011              | Eid                | probably high risk of bias | probably high risk of bias | low risk of bias           | low risk of bias | probably low risk of bias |
| cefepime                                   | standard care/placebo                            |                    |                    |                            |                            |                            |                  |                           |
|                                            |                                                  | 70011              | Eid                | probably high risk of bias | probably high risk of bias | low risk of bias           | low risk of bias | probably low risk of bias |
| ceftazidime                                | standard care/placebo                            |                    |                    |                            |                            |                            |                  |                           |
|                                            |                                                  | 70011              | Eid                | probably high risk of bias | probably high risk of bias | low risk of bias           | low risk of bias | probably low risk of bias |

|                                                                                  |                                             |                                                                                                                                                     |                                                                                                                                                                            |                                                                                                                                                                                                                                                                                                                                                                                                                    |                                                                                                                                                                                                                                                                                                                                                                                                                                                                |                                                                                                                                                                                                                                                                                                                              |                                                                                                                                                                                                                                                                                                                              |                                                                                                                                                                                                                                                                                                                              |
|----------------------------------------------------------------------------------|---------------------------------------------|-----------------------------------------------------------------------------------------------------------------------------------------------------|----------------------------------------------------------------------------------------------------------------------------------------------------------------------------|--------------------------------------------------------------------------------------------------------------------------------------------------------------------------------------------------------------------------------------------------------------------------------------------------------------------------------------------------------------------------------------------------------------------|----------------------------------------------------------------------------------------------------------------------------------------------------------------------------------------------------------------------------------------------------------------------------------------------------------------------------------------------------------------------------------------------------------------------------------------------------------------|------------------------------------------------------------------------------------------------------------------------------------------------------------------------------------------------------------------------------------------------------------------------------------------------------------------------------|------------------------------------------------------------------------------------------------------------------------------------------------------------------------------------------------------------------------------------------------------------------------------------------------------------------------------|------------------------------------------------------------------------------------------------------------------------------------------------------------------------------------------------------------------------------------------------------------------------------------------------------------------------------|
| chloroquine`                                                                     | hydroxychloroquine                          | 1129, 2118                                                                                                                                          | Silva Borba                                                                                                                                                                | low risk of bias                                                                                                                                                                                                                                                                                                                                                                                                   | low risk of bias                                                                                                                                                                                                                                                                                                                                                                                                                                               | low risk of bias                                                                                                                                                                                                                                                                                                             | low risk of bias                                                                                                                                                                                                                                                                                                             | low risk of bias                                                                                                                                                                                                                                                                                                             |
| clarithromycin                                                                   | standard care/placebo                       | 58017                                                                                                                                               | Rashad_3                                                                                                                                                                   | low risk of bias                                                                                                                                                                                                                                                                                                                                                                                                   | probably high risk of bias                                                                                                                                                                                                                                                                                                                                                                                                                                     | low risk of bias                                                                                                                                                                                                                                                                                                             | low risk of bias                                                                                                                                                                                                                                                                                                             | probably low risk of bias                                                                                                                                                                                                                                                                                                    |
| colchicine                                                                       | standard care/placebo                       | 7189<br>11<br>28222, 45870<br>10500, xx<br>Horby_6<br>64351<br>64385                                                                                | Deftereos<br>Salehzadeh<br>Tardif<br>Lopes_2<br>Horby_6<br>Dorward<br>Pascual-Figal                                                                                        | low risk of bias<br>probably high risk of bias<br>probably low risk of bias<br>probably low risk of bias<br>low risk of bias<br>low risk of bias<br>low risk of bias                                                                                                                                                                                                                                               | probably high risk of bias<br>probably high risk of bias<br>low risk of bias<br>low risk of bias<br>probably high risk of bias<br>probably high risk of bias<br>probably high risk of bias                                                                                                                                                                                                                                                                     | low risk of bias<br>low risk of bias                                                                                                                                                                                     | low risk of bias<br>low risk of bias                                                                                                                                                                                     | low risk of bias<br>probably low risk of bias<br>low risk of bias<br>probably low risk of bias<br>low risk of bias<br>low risk of bias<br>low risk of bias                                                                                                                                                                   |
| colchicine, emtricitabine, tenofovir, statir                                     | emtricitabine, tenofovir                    | Gaitan-Duarte                                                                                                                                       | Gaitan-Duarte                                                                                                                                                              | low risk of bias                                                                                                                                                                                                                                                                                                                                                                                                   | probably high risk of bias                                                                                                                                                                                                                                                                                                                                                                                                                                     | low risk of bias                                                                                                                                                                                                                                                                                                             | low risk of bias                                                                                                                                                                                                                                                                                                             | low risk of bias                                                                                                                                                                                                                                                                                                             |
| colchicine, emtricitabine, tenofovir, statir                                     | standard care/placebo                       | Gaitan-Duarte                                                                                                                                       | Gaitan-Duarte                                                                                                                                                              | low risk of bias                                                                                                                                                                                                                                                                                                                                                                                                   | probably high risk of bias                                                                                                                                                                                                                                                                                                                                                                                                                                     | low risk of bias                                                                                                                                                                                                                                                                                                             | low risk of bias                                                                                                                                                                                                                                                                                                             | low risk of bias                                                                                                                                                                                                                                                                                                             |
| colchicine, statin                                                               | olchicine, emtricitabine, tenofovir, statin | Gaitan-Duarte                                                                                                                                       | Gaitan-Duarte                                                                                                                                                              | low risk of bias                                                                                                                                                                                                                                                                                                                                                                                                   | probably high risk of bias                                                                                                                                                                                                                                                                                                                                                                                                                                     | low risk of bias                                                                                                                                                                                                                                                                                                             | low risk of bias                                                                                                                                                                                                                                                                                                             | low risk of bias                                                                                                                                                                                                                                                                                                             |
| colchicine, statin                                                               | emtricitabine, tenofovir                    | Gaitan-Duarte                                                                                                                                       | Gaitan-Duarte                                                                                                                                                              | low risk of bias                                                                                                                                                                                                                                                                                                                                                                                                   | probably high risk of bias                                                                                                                                                                                                                                                                                                                                                                                                                                     | low risk of bias                                                                                                                                                                                                                                                                                                             | low risk of bias                                                                                                                                                                                                                                                                                                             | low risk of bias                                                                                                                                                                                                                                                                                                             |
| colchicine, statin                                                               | standard care/placebo                       | Gaitan-Duarte                                                                                                                                       | Gaitan-Duarte                                                                                                                                                              | low risk of bias                                                                                                                                                                                                                                                                                                                                                                                                   | probably high risk of bias                                                                                                                                                                                                                                                                                                                                                                                                                                     | low risk of bias                                                                                                                                                                                                                                                                                                             | low risk of bias                                                                                                                                                                                                                                                                                                             | low risk of bias                                                                                                                                                                                                                                                                                                             |
| id (systemic), doxycycline, intranasal cofactory training, standard care/placebo |                                             | Husain                                                                                                                                              | Husain                                                                                                                                                                     | probably high risk of bias                                                                                                                                                                                                                                                                                                                                                                                         | probably high risk of bias                                                                                                                                                                                                                                                                                                                                                                                                                                     | low risk of bias                                                                                                                                                                                                                                                                                                             | low risk of bias                                                                                                                                                                                                                                                                                                             | probably low risk of bias                                                                                                                                                                                                                                                                                                    |
| corticosteroids (systemic)                                                       | standard care/placebo                       | 29672, 6743<br>33381, 7002, 861!<br>10699<br>12062<br>12141<br>12146<br>12076_NCT043250<br>12076_NCT042445<br>13208<br>2<br>27640<br>31583<br>49210 | Corral-Gudino<br>Horby_1<br>Jeronimo<br>Dequin<br>Tomazini<br>Angus<br>Sterne_NCT04325061<br>Sterne_NCT04244591<br>Edalatifard<br>Farahani<br>Tang_2<br>Jamaati<br>Munch_1 | low risk of bias<br>low risk of bias<br>low risk of bias<br>low risk of bias<br>low risk of bias<br>probably high risk of bias<br>low risk of bias<br>probably low risk of bias<br>probably high risk of bias<br>probably low risk of bias<br>probably low risk of bias<br>probably high risk of bias<br>probably high risk of bias<br>probably low risk of bias<br>probably high risk of bias<br>low risk of bias | probably high risk of bias<br>probably high risk of bias<br>low risk of bias<br>low risk of bias<br>probably high risk of bias<br>low risk of bias | low risk of bias<br>low risk of bias | low risk of bias<br>low risk of bias | low risk of bias<br>low risk of bias |
| corticosteroids (systemic), tacrolimus                                           | standard care/placebo                       | 51435                                                                                                                                               | Solanich                                                                                                                                                                   | probably high risk of bias                                                                                                                                                                                                                                                                                                                                                                                         | probably high risk of bias                                                                                                                                                                                                                                                                                                                                                                                                                                     | low risk of bias                                                                                                                                                                                                                                                                                                             | low risk of bias                                                                                                                                                                                                                                                                                                             | low risk of bias                                                                                                                                                                                                                                                                                                             |
| curcumin, piperine                                                               | probiotics                                  | 48609                                                                                                                                               | Pawar                                                                                                                                                                      | probably low risk of bias                                                                                                                                                                                                                                                                                                                                                                                          | low risk of bias                                                                                                                                                                                                                                                                                                                                                                                                                                               | low risk of bias                                                                                                                                                                                                                                                                                                             | low risk of bias                                                                                                                                                                                                                                                                                                             | probably low risk of bias                                                                                                                                                                                                                                                                                                    |
| curcumin, vitamin C, zinc                                                        | standard care/placebo                       | 37882                                                                                                                                               | Yogesh                                                                                                                                                                     | probably high risk of bias                                                                                                                                                                                                                                                                                                                                                                                         | probably high risk of bias                                                                                                                                                                                                                                                                                                                                                                                                                                     | low risk of bias                                                                                                                                                                                                                                                                                                             | low risk of bias                                                                                                                                                                                                                                                                                                             | probably low risk of bias                                                                                                                                                                                                                                                                                                    |
| diammonium glycyrrhizinate                                                       | standard care/placebo                       | Csun                                                                                                                                                | Sun                                                                                                                                                                        | probably high risk of bias                                                                                                                                                                                                                                                                                                                                                                                         | probably high risk of bias                                                                                                                                                                                                                                                                                                                                                                                                                                     | low risk of bias                                                                                                                                                                                                                                                                                                             | low risk of bias                                                                                                                                                                                                                                                                                                             | probably low risk of bias                                                                                                                                                                                                                                                                                                    |
| doxycycline                                                                      | standard care/placebo                       | 55459, Butler_doxycly                                                                                                                               | Butler                                                                                                                                                                     | low risk of bias                                                                                                                                                                                                                                                                                                                                                                                                   | probably high risk of bias                                                                                                                                                                                                                                                                                                                                                                                                                                     | low risk of bias                                                                                                                                                                                                                                                                                                             | low risk of bias                                                                                                                                                                                                                                                                                                             | low risk of bias                                                                                                                                                                                                                                                                                                             |
| doxycycline, ivermectin                                                          | standard care/placebo                       | 43517                                                                                                                                               | Mahmud                                                                                                                                                                     | low risk of bias                                                                                                                                                                                                                                                                                                                                                                                                   | low risk of bias                                                                                                                                                                                                                                                                                                                                                                                                                                               | low risk of bias                                                                                                                                                                                                                                                                                                             | low risk of bias                                                                                                                                                                                                                                                                                                             | low risk of bias                                                                                                                                                                                                                                                                                                             |
| electrolyzed saline                                                              | standard care/placebo                       |                                                                                                                                                     |                                                                                                                                                                            |                                                                                                                                                                                                                                                                                                                                                                                                                    |                                                                                                                                                                                                                                                                                                                                                                                                                                                                |                                                                                                                                                                                                                                                                                                                              |                                                                                                                                                                                                                                                                                                                              |                                                                                                                                                                                                                                                                                                                              |

|                                         |                                                  |                                                                                                                                      |                                                                                |                                                                                                                                                                        |                                                                                                                                                                                              |                                                                                                                                          |                                                                                                                                          |                                                                                                                                                                              |
|-----------------------------------------|--------------------------------------------------|--------------------------------------------------------------------------------------------------------------------------------------|--------------------------------------------------------------------------------|------------------------------------------------------------------------------------------------------------------------------------------------------------------------|----------------------------------------------------------------------------------------------------------------------------------------------------------------------------------------------|------------------------------------------------------------------------------------------------------------------------------------------|------------------------------------------------------------------------------------------------------------------------------------------|------------------------------------------------------------------------------------------------------------------------------------------------------------------------------|
|                                         |                                                  | 13074, 53789                                                                                                                         | Delgado-Enciso                                                                 | probably high risk of bias                                                                                                                                             | probably high risk of bias                                                                                                                                                                   | low risk of bias                                                                                                                         | low risk of bias                                                                                                                         | low risk of bias                                                                                                                                                             |
| emtricitabine, tenofovir                | standard care/placebo                            |                                                                                                                                      |                                                                                |                                                                                                                                                                        |                                                                                                                                                                                              |                                                                                                                                          |                                                                                                                                          |                                                                                                                                                                              |
|                                         |                                                  | 50792<br>Gaitan-Duarte                                                                                                               | Parianti<br>Gaitan-Duarte                                                      | low risk of bias<br>low risk of bias                                                                                                                                   | probably high risk of bias<br>probably high risk of bias                                                                                                                                     | low risk of bias<br>low risk of bias                                                                                                     | low risk of bias<br>low risk of bias                                                                                                     | probably low risk of bias<br>low risk of bias                                                                                                                                |
| famotidine                              | standard care/placebo                            |                                                                                                                                      |                                                                                |                                                                                                                                                                        |                                                                                                                                                                                              |                                                                                                                                          |                                                                                                                                          |                                                                                                                                                                              |
|                                         |                                                  | Samimagham                                                                                                                           | Samimagham                                                                     | low risk of bias                                                                                                                                                       | probably high risk of bias                                                                                                                                                                   | low risk of bias                                                                                                                         | low risk of bias                                                                                                                         | probably low risk of bias                                                                                                                                                    |
| favipiravir                             | hydroxychloroquine, interferon alpha, umifenovir |                                                                                                                                      |                                                                                |                                                                                                                                                                        |                                                                                                                                                                                              |                                                                                                                                          |                                                                                                                                          |                                                                                                                                                                              |
|                                         |                                                  | Khavkina                                                                                                                             | Khavkina                                                                       | probably high risk of bias                                                                                                                                             | probably high risk of bias                                                                                                                                                                   | probably low risk of bias                                                                                                                | low risk of bias                                                                                                                         | probably low risk of bias                                                                                                                                                    |
| favipiravir                             | lopinavir-ritonavir                              |                                                                                                                                      |                                                                                |                                                                                                                                                                        |                                                                                                                                                                                              |                                                                                                                                          |                                                                                                                                          |                                                                                                                                                                              |
|                                         |                                                  | 35903                                                                                                                                | Solaymani-Dodaran                                                              | low risk of bias                                                                                                                                                       | probably high risk of bias                                                                                                                                                                   | low risk of bias                                                                                                                         | low risk of bias                                                                                                                         | low risk of bias                                                                                                                                                             |
| favipiravir                             | standard care/placebo                            |                                                                                                                                      |                                                                                |                                                                                                                                                                        |                                                                                                                                                                                              |                                                                                                                                          |                                                                                                                                          |                                                                                                                                                                              |
|                                         |                                                  | 2637, Lou, Lou (1),<br>10147, 10287, 997<br>24988, Udwadia<br>27459<br>40875<br>32586<br>60646                                       | Lou<br>Ivashchenko<br>Udwadia<br>Balykova_1<br>Zhao_2<br>Balykova_2<br>Shinkai | low risk of bias<br>probably high risk of bias<br>probably high risk of bias<br>probably high risk of bias<br>low risk of bias<br>low risk of bias<br>low risk of bias | probably high risk of bias<br>high risk of bias<br>probably high risk of bias<br>high risk of bias<br>probably high risk of bias<br>probably high risk of bias<br>probably high risk of bias | low risk of bias<br>low risk of bias | low risk of bias<br>low risk of bias | low risk of bias<br>low risk of bias<br>probably low risk of bias<br>probably low risk of bias<br>probably low risk of bias<br>low risk of bias<br>probably low risk of bias |
| favipiravir                             | umifenovir                                       |                                                                                                                                      |                                                                                |                                                                                                                                                                        |                                                                                                                                                                                              |                                                                                                                                          |                                                                                                                                          |                                                                                                                                                                              |
|                                         |                                                  | 173                                                                                                                                  | Chen_2                                                                         | probably high risk of bias                                                                                                                                             | probably high risk of bias                                                                                                                                                                   | low risk of bias                                                                                                                         | low risk of bias                                                                                                                         | low risk of bias                                                                                                                                                             |
| favipiravir, hydroxychloroquine         | standard care/placebo                            |                                                                                                                                      |                                                                                |                                                                                                                                                                        |                                                                                                                                                                                              |                                                                                                                                          |                                                                                                                                          |                                                                                                                                                                              |
|                                         |                                                  | Bosaeed                                                                                                                              | Bosaeed                                                                        | low risk of bias                                                                                                                                                       | probably high risk of bias                                                                                                                                                                   | low risk of bias                                                                                                                         | low risk of bias                                                                                                                         | low risk of bias                                                                                                                                                             |
| febuxostat                              | hydroxychloroquine                               |                                                                                                                                      |                                                                                |                                                                                                                                                                        |                                                                                                                                                                                              |                                                                                                                                          |                                                                                                                                          |                                                                                                                                                                              |
|                                         |                                                  | 7586, Davoodi                                                                                                                        | Davoodi                                                                        | probably high risk of bias                                                                                                                                             | probably high risk of bias                                                                                                                                                                   | probably high risk of bias                                                                                                               | low risk of bias                                                                                                                         | probably low risk of bias                                                                                                                                                    |
| fluvoxamine                             | standard care/placebo                            |                                                                                                                                      |                                                                                |                                                                                                                                                                        |                                                                                                                                                                                              |                                                                                                                                          |                                                                                                                                          |                                                                                                                                                                              |
|                                         |                                                  | 18818<br>70784, Reis_2                                                                                                               | Lenze<br>Reis_2                                                                | low risk of bias<br>low risk of bias                                                                                                                                   | low risk of bias<br>low risk of bias                                                                                                                                                         | high risk of bias<br>low risk of bias                                                                                                    | low risk of bias<br>low risk of bias                                                                                                     | low risk of bias<br>low risk of bias                                                                                                                                         |
| full-dose anticoagulant                 | intermediate-dose anticoagulation                |                                                                                                                                      |                                                                                |                                                                                                                                                                        |                                                                                                                                                                                              |                                                                                                                                          |                                                                                                                                          |                                                                                                                                                                              |
|                                         |                                                  | Spyropoulos                                                                                                                          | Spyropoulos                                                                    | probably low risk of bias                                                                                                                                              | low risk of bias                                                                                                                                                                             | low risk of bias                                                                                                                         | low risk of bias                                                                                                                         | low risk of bias                                                                                                                                                             |
| full-dose anticoagulation               | intermediate-dose anticoagulation                |                                                                                                                                      |                                                                                |                                                                                                                                                                        |                                                                                                                                                                                              |                                                                                                                                          |                                                                                                                                          |                                                                                                                                                                              |
|                                         |                                                  | 65782<br>67889                                                                                                                       | Oliynyk<br>Marcos                                                              | probably high risk of bias<br>low risk of bias                                                                                                                         | probably high risk of bias<br>probably high risk of bias                                                                                                                                     | low risk of bias<br>low risk of bias                                                                                                     | low risk of bias<br>low risk of bias                                                                                                     | probably low risk of bias<br>probably low risk of bias                                                                                                                       |
| full-dose anticoagulation               | standard care/placebo                            |                                                                                                                                      |                                                                                |                                                                                                                                                                        |                                                                                                                                                                                              |                                                                                                                                          |                                                                                                                                          |                                                                                                                                                                              |
|                                         |                                                  | 13836<br>34844, ATTACC/ACTIV-4a/RAP, ACTIV-4a, and ATTACC<br>35895, Bikdeli<br>47030<br>56911, Lawler<br>Sholzberg<br>64008<br>67646 | Lemos<br>Bikdeli<br>Lopes_3<br>Lawler<br>Sholzberg<br>Ananworanich<br>Connors  | low risk of bias<br>low risk of bias<br>low risk of bias<br>low risk of bias<br>low risk of bias<br>probably low risk of bias<br>low risk of bias                      | probably high risk of bias<br>probably high risk of bias<br>probably high risk of bias<br>probably high risk of bias<br>probably high risk of bias<br>low risk of bias<br>low risk of bias   | low risk of bias<br>low risk of bias | low risk of bias<br>low risk of bias | low risk of bias<br>low risk of bias<br>probably low risk of bias<br>low risk of bias<br>low risk of bias<br>low risk of bias<br>low risk of bias                            |
| full-dose anticoagulation, thrombolysis | standard care/placebo                            |                                                                                                                                      |                                                                                |                                                                                                                                                                        |                                                                                                                                                                                              |                                                                                                                                          |                                                                                                                                          |                                                                                                                                                                              |
|                                         |                                                  | 65552_P1<br>65552_P2                                                                                                                 | Barrett_P1<br>Barrett_P2                                                       | low risk of bias<br>low risk of bias                                                                                                                                   | probably high risk of bias<br>probably high risk of bias                                                                                                                                     | low risk of bias<br>low risk of bias                                                                                                     | low risk of bias<br>low risk of bias                                                                                                     | low risk of bias<br>low risk of bias                                                                                                                                         |
| hydroxychloroquine                      | hydroxychloroquine, lopinavir-ritonavir          |                                                                                                                                      |                                                                                |                                                                                                                                                                        |                                                                                                                                                                                              |                                                                                                                                          |                                                                                                                                          |                                                                                                                                                                              |
|                                         |                                                  | 52697                                                                                                                                | Arabi                                                                          | low risk of bias                                                                                                                                                       | probably high risk of bias                                                                                                                                                                   | low risk of bias                                                                                                                         | low risk of bias                                                                                                                         | probably high risk of bias                                                                                                                                                   |
| hydroxychloroquine                      | hydroxychloroquine, zinc                         |                                                                                                                                      |                                                                                |                                                                                                                                                                        |                                                                                                                                                                                              |                                                                                                                                          |                                                                                                                                          |                                                                                                                                                                              |
|                                         |                                                  | 21407                                                                                                                                | Abd-El salam                                                                   | probably high risk of bias                                                                                                                                             | probably high risk of bias                                                                                                                                                                   | low risk of bias                                                                                                                         | low risk of bias                                                                                                                         | low risk of bias                                                                                                                                                             |
| hydroxychloroquine                      | interferon alpha                                 |                                                                                                                                      |                                                                                |                                                                                                                                                                        |                                                                                                                                                                                              |                                                                                                                                          |                                                                                                                                          |                                                                                                                                                                              |
|                                         |                                                  | 18336, Khamis                                                                                                                        | Khamis                                                                         | probably high risk of bias                                                                                                                                             | high risk of bias                                                                                                                                                                            | low risk of bias                                                                                                                         | low risk of bias                                                                                                                         | probably low risk of bias                                                                                                                                                    |
| hydroxychloroquine                      | interferon beta, lopinavir-ritonavir             |                                                                                                                                      |                                                                                |                                                                                                                                                                        |                                                                                                                                                                                              |                                                                                                                                          |                                                                                                                                          |                                                                                                                                                                              |

|                                         |                                |                               |                        |                            |                            |                            |                  |                            |
|-----------------------------------------|--------------------------------|-------------------------------|------------------------|----------------------------|----------------------------|----------------------------|------------------|----------------------------|
|                                         |                                | 45662, Ader_1                 | Ader_1                 | low risk of bias           | probably high risk of bias | low risk of bias           | low risk of bias | low risk of bias           |
| hydroxychloroquine                      | ivermectin                     |                               |                        |                            |                            |                            |                  |                            |
|                                         |                                | Gonzalez 34666                | Gonzalez Galan         | probably high risk of bias | low risk of bias           | low risk of bias           | low risk of bias | probably low risk of bias  |
|                                         |                                |                               |                        | low risk of bias           | low risk of bias           | low risk of bias           | low risk of bias | probably low risk of bias  |
| hydroxychloroquine                      | lopinavir-ritonavir            |                               |                        |                            |                            |                            |                  |                            |
|                                         |                                | Reis_1                        | Reis_1                 | low risk of bias           | low risk of bias           | probably high risk of bias | low risk of bias | low risk of bias           |
|                                         |                                | 45662, Ader_1                 | Ader_1                 | low risk of bias           | probably high risk of bias | low risk of bias           | low risk of bias | low risk of bias           |
|                                         |                                | 52697                         | Arabi                  | low risk of bias           | probably high risk of bias | low risk of bias           | low risk of bias | probably high risk of bias |
| hydroxychloroquine                      | standard care/placebo          |                               |                        |                            |                            |                            |                  |                            |
|                                         |                                | 3321, 776                     | Tang_1                 | low risk of bias           | probably high risk of bias | low risk of bias           | low risk of bias | low risk of bias           |
|                                         |                                | C158                          | Chen_3                 | probably high risk of bias | probably high risk of bias | low risk of bias           | low risk of bias | low risk of bias           |
|                                         |                                | 6987                          | Chen_4                 | probably high risk of bias | probably high risk of bias | high risk of bias          | low risk of bias | probably low risk of bias  |
|                                         |                                | 8057, Chen (Cheng-I           | Chen_5                 | low risk of bias           | probably high risk of bias | low risk of bias           | low risk of bias | probably low risk of bias  |
|                                         |                                | 14989, 8444, xx               | Horby_2                | low risk of bias           | probably high risk of bias | low risk of bias           | low risk of bias | low risk of bias           |
|                                         |                                | 8565                          | Skipper                | low risk of bias           | low risk of bias           | low risk of bias           | low risk of bias | low risk of bias           |
|                                         |                                | 22152, 9166                   | Cavalcanti             | low risk of bias           | probably high risk of bias | low risk of bias           | low risk of bias | low risk of bias           |
|                                         |                                | 11299                         | Abd-El salam_1         | probably high risk of bias | probably high risk of bias | low risk of bias           | low risk of bias | low risk of bias           |
|                                         |                                | 13936                         | Ulrich                 | probably low risk of bias  | low risk of bias           | high risk of bias          | low risk of bias | low risk of bias           |
|                                         |                                | 15632, Pan_hydroxychloroquine | Pan_hydroxychloroquine | low risk of bias           | probably high risk of bias | low risk of bias           | low risk of bias | low risk of bias           |
|                                         |                                | 16085, 38308                  | Dubée                  | low risk of bias           | low risk of bias           | low risk of bias           | low risk of bias | low risk of bias           |
|                                         |                                | 1_NCT04345289                 | Axfors_NCT04345289     | probably high risk of bias | low risk of bias           | probably high risk of bias | low risk of bias | low risk of bias           |
|                                         |                                | 1_NCT04335552                 | Axfors_NCT04335552     | probably high risk of bias | probably high risk of bias | probably high risk of bias | low risk of bias | low risk of bias           |
|                                         |                                | 1_NL8490                      | Axfors_NL8490          | probably high risk of bias | probably high risk of bias | probably high risk of bias | low risk of bias | probably low risk of bias  |
|                                         |                                | 1_NCT04342650                 | Axfors_NCT04342650     | probably high risk of bias | low risk of bias           | probably high risk of bias | low risk of bias | low risk of bias           |
|                                         |                                | 1_NCT04323527                 | Axfors_NCT04323527     | probably high risk of bias | low risk of bias           | probably high risk of bias | low risk of bias | low risk of bias           |
|                                         |                                | 1_ChICTR20000312              | Axfors_ChICTR20000312  | probably high risk of bias | probably high risk of bias | probably high risk of bias | low risk of bias | probably low risk of bias  |
|                                         |                                | 1_NCT04333654                 | Axfors_NCT04333654     | probably high risk of bias | low risk of bias           | probably high risk of bias | low risk of bias | probably low risk of bias  |
|                                         |                                | 1_NCT04345692                 | Axfors_NCT04345692     | probably high risk of bias | probably high risk of bias | probably high risk of bias | low risk of bias | low risk of bias           |
|                                         |                                | 1_NCT04342221                 | Axfors_NCT04342221     | probably high risk of bias | low risk of bias           | probably high risk of bias | low risk of bias | low risk of bias           |
|                                         |                                | 1_NCT04340544                 | Axfors_NCT04340544     | probably high risk of bias | low risk of bias           | probably high risk of bias | low risk of bias | low risk of bias           |
|                                         |                                | 16281                         | Lyngbakken             | probably high risk of bias | probably high risk of bias | low risk of bias           | low risk of bias | low risk of bias           |
|                                         |                                | 18245, 23358                  | Self                   | low risk of bias           | low risk of bias           | low risk of bias           | low risk of bias | low risk of bias           |
|                                         |                                | 20005                         | Omrani                 | low risk of bias           | low risk of bias           | low risk of bias           | low risk of bias | probably low risk of bias  |
|                                         |                                | Reis_1                        | Reis_1                 | low risk of bias           | low risk of bias           | probably high risk of bias | low risk of bias | low risk of bias           |
|                                         |                                | 33489, Johnston               | Johnston               | probably low risk of bias  | low risk of bias           | low risk of bias           | low risk of bias | probably low risk of bias  |
|                                         |                                | 45662, Ader_1                 | Ader_1                 | low risk of bias           | probably high risk of bias | low risk of bias           | low risk of bias | low risk of bias           |
|                                         |                                | 29663                         | Hernandez-Cardenas     | low risk of bias           | low risk of bias           | low risk of bias           | low risk of bias | high risk of bias          |
|                                         |                                | Gonzalez                      | Gonzalez               | probably high risk of bias | low risk of bias           | low risk of bias           | low risk of bias | probably low risk of bias  |
|                                         |                                | 33028                         | Amaravadi              | low risk of bias           | low risk of bias           | low risk of bias           | low risk of bias | low risk of bias           |
|                                         |                                | 41434                         | Réa-Neto               | low risk of bias           | probably high risk of bias | low risk of bias           | low risk of bias | low risk of bias           |
|                                         |                                | Schwartz_2                    | Schwartz_2             | low risk of bias           | low risk of bias           | low risk of bias           | low risk of bias | low risk of bias           |
|                                         |                                | 52697                         | Arabi                  | low risk of bias           | probably high risk of bias | low risk of bias           | low risk of bias | probably high risk of bias |
| hydroxychloroquine, lopinavir-ritonavir | hydroxychloroquine, umifenovir |                               |                        |                            |                            |                            |                  |                            |
|                                         |                                | 23259, 8                      | Nojomi                 | low risk of bias           | probably high risk of bias | low risk of bias           | low risk of bias | low risk of bias           |
| hydroxychloroquine, lopinavir-ritonavir | lopinavir-ritonavir            |                               |                        |                            |                            |                            |                  |                            |
|                                         |                                | 52697                         | Arabi                  | low risk of bias           | probably high risk of bias | low risk of bias           | low risk of bias | probably high risk of bias |
| hydroxychloroquine, lopinavir-ritonavir | standard care/placebo          |                               |                        |                            |                            |                            |                  |                            |
|                                         |                                | 52697                         | Arabi                  | low risk of bias           | probably high risk of bias | low risk of bias           | low risk of bias | probably high risk of bias |
| hydroxychloroquine, oseltamivir         | oseltamivir                    |                               |                        |                            |                            |                            |                  |                            |
|                                         |                                | 1_NCT04338698                 | Axfors_NCT04338698     | probably high risk of bias | probably high risk of bias | probably high risk of bias | low risk of bias | low risk of bias           |
| hydroxychloroquine, rivabirin           | lopinavir-ritonavir, ribavirin |                               |                        |                            |                            |                            |                  |                            |
|                                         |                                | 46308_severe                  | Singh_3                | probably high risk of bias | probably high risk of bias | low risk of bias           | low risk of bias | low risk of bias           |
| hydroxychloroquine, rivabirin           | standard care/placebo          |                               |                        |                            |                            |                            |                  |                            |
|                                         |                                | 46308_non severe              | Singh_2                | probably high risk of bias | probably high risk of bias | low risk of bias           | low risk of bias | low risk of bias           |
|                                         |                                | 46308_severe                  | Singh_3                | probably high risk of bias | probably high risk of bias | low risk of bias           | low risk of bias | low risk of bias           |
| inhaled nebulised interferon beta-1a    | standard care/placebo          |                               |                        |                            |                            |                            |                  |                            |
|                                         |                                | 18657                         | Monk                   | low risk of bias           | low risk of bias           | high risk of bias          | low risk of bias | probably low risk of bias  |

|                                      |                                          |                                                                                                                                             |                                                                                                               |                                                                                                                                                                                                                         |                                                                                                                                                                                                                |                                                                                                                                                                                  |                                                                                                                                                                                                                      |                                                                                                                              |
|--------------------------------------|------------------------------------------|---------------------------------------------------------------------------------------------------------------------------------------------|---------------------------------------------------------------------------------------------------------------|-------------------------------------------------------------------------------------------------------------------------------------------------------------------------------------------------------------------------|----------------------------------------------------------------------------------------------------------------------------------------------------------------------------------------------------------------|----------------------------------------------------------------------------------------------------------------------------------------------------------------------------------|----------------------------------------------------------------------------------------------------------------------------------------------------------------------------------------------------------------------|------------------------------------------------------------------------------------------------------------------------------|
| inhaled pan-JAK inhibitor            | standard care/placebo                    | 34842                                                                                                                                       | Singh_1                                                                                                       | probably low risk of bias                                                                                                                                                                                               | low risk of bias                                                                                                                                                                                               | low risk of bias                                                                                                                                                                 | low risk of bias                                                                                                                                                                                                     | low risk of bias                                                                                                             |
| interferon alpha                     | recombinant super recombinant interferon | 32737, 7, 9574                                                                                                                              | Li_2                                                                                                          | probably high risk of bias                                                                                                                                                                                              | probably high risk of bias                                                                                                                                                                                     | low risk of bias                                                                                                                                                                 | low risk of bias                                                                                                                                                                                                     | low risk of bias                                                                                                             |
| interferon alpha                     | standard care/placebo                    | 35022<br>59366, 60209                                                                                                                       | Pandit<br>Bhushan                                                                                             | probably high risk of bias<br>probably high risk of bias                                                                                                                                                                | probably high risk of bias<br>probably high risk of bias                                                                                                                                                       | low risk of bias<br>low risk of bias                                                                                                                                             | low risk of bias<br>low risk of bias                                                                                                                                                                                 | probably low risk of bias<br>probably low risk of bias                                                                       |
| interferon beta                      | standard care/placebo                    | 11541, 11937<br>15632, Pan_interferon<br>39381, Darazam_2<br>Kalil_2<br>11243, 5514, 824:                                                   | Rahmani<br>Pan_interferon<br>Darazam_2<br>Kalil_2<br>Davoudi-Monfared                                         | probably high risk of bias<br>low risk of bias<br>low risk of bias<br>low risk of bias<br>low risk of bias                                                                                                              | probably high risk of bias<br>probably high risk of bias<br>probably high risk of bias<br>low risk of bias<br>high risk of bias                                                                                | high risk of bias<br>low risk of bias<br>low risk of bias<br>low risk of bias<br>probably high risk of bias                                                                      | low risk of bias<br>low risk of bias<br>low risk of bias<br>low risk of bias<br>low risk of bias                                                                                                                     | probably low risk of bias<br>low risk of bias<br>probably high risk of bias<br>low risk of bias<br>probably low risk of bias |
| interferon beta, lopinavir-ritonavir | lopinavir-ritonavir                      | 45662, Ader_1                                                                                                                               | Ader_1                                                                                                        | low risk of bias                                                                                                                                                                                                        | probably high risk of bias                                                                                                                                                                                     | low risk of bias                                                                                                                                                                 | low risk of bias                                                                                                                                                                                                     | low risk of bias                                                                                                             |
| interferon beta, lopinavir-ritonavir | antihypaciviral                          | Mostafa                                                                                                                                     | Alavi-Moghaddam                                                                                               | probably high risk of bias                                                                                                                                                                                              | probably high risk of bias                                                                                                                                                                                     | low risk of bias                                                                                                                                                                 | low risk of bias                                                                                                                                                                                                     | low risk of bias                                                                                                             |
| interferon beta, lopinavir-ritonavir | standard care/placebo                    | 45662, Ader_1                                                                                                                               | Ader_1                                                                                                        | low risk of bias                                                                                                                                                                                                        | probably high risk of bias                                                                                                                                                                                     | low risk of bias                                                                                                                                                                 | low risk of bias                                                                                                                                                                                                     | low risk of bias                                                                                                             |
| interferon beta, ribavirin           | standard care/placebo                    | 2942                                                                                                                                        | Hung                                                                                                          | probably high risk of bias                                                                                                                                                                                              | probably high risk of bias                                                                                                                                                                                     | low risk of bias                                                                                                                                                                 | low risk of bias                                                                                                                                                                                                     | low risk of bias                                                                                                             |
| interferon gamma                     | standard care/placebo                    | 9880                                                                                                                                        | Esquivel-Moynele                                                                                              | probably high risk of bias                                                                                                                                                                                              | probably high risk of bias                                                                                                                                                                                     | low risk of bias                                                                                                                                                                 | low risk of bias                                                                                                                                                                                                     | probably low risk of bias                                                                                                    |
| interferon kappa, trefoil factor 2   | standard care/placebo                    | 13797                                                                                                                                       | Fu                                                                                                            | probably high risk of bias                                                                                                                                                                                              | probably high risk of bias                                                                                                                                                                                     | low risk of bias                                                                                                                                                                 | low risk of bias                                                                                                                                                                                                     | probably low risk of bias                                                                                                    |
| intranasal corticosteroids           | standard care/placebo                    | 57833<br>Clemency<br>Ezer                                                                                                                   | Song<br>Clemency<br>Ezer                                                                                      | probably high risk of bias<br>low risk of bias<br>low risk of bias                                                                                                                                                      | probably high risk of bias<br>low risk of bias<br>low risk of bias                                                                                                                                             | low risk of bias<br>low risk of bias<br>low risk of bias                                                                                                                         | low risk of bias<br>low risk of bias<br>low risk of bias                                                                                                                                                             | probably low risk of bias<br>low risk of bias<br>low risk of bias                                                            |
| itilizumab                           | standard care/placebo                    | 21347, Kumar                                                                                                                                | Kumar_1                                                                                                       | probably high risk of bias                                                                                                                                                                                              | probably high risk of bias                                                                                                                                                                                     | low risk of bias                                                                                                                                                                 | low risk of bias                                                                                                                                                                                                     | low risk of bias                                                                                                             |
| itraconazole                         | standard care/placebo                    | 36093, Liesenborgl                                                                                                                          | Liesenborghs                                                                                                  | probably high risk of bias                                                                                                                                                                                              | probably high risk of bias                                                                                                                                                                                     | low risk of bias                                                                                                                                                                 | low risk of bias                                                                                                                                                                                                     | low risk of bias                                                                                                             |
| ivermectin                           | lopinavir-ritonavir                      | 25394, Babalola                                                                                                                             | Babalola                                                                                                      | low risk of bias                                                                                                                                                                                                        | low risk of bias                                                                                                                                                                                               | low risk of bias                                                                                                                                                                 | low risk of bias                                                                                                                                                                                                     | probably low risk of bias                                                                                                    |
| ivermectin                           | standard care/placebo                    | 49440, Krolewiecki<br>Niaee<br>53436, Ravikirti<br>Mohan<br>34416, 41159, Lopez-Medina<br>Gonzalez<br>47181, Abd-Elsalam<br>Chahla<br>51938 | Krolewiecki<br>Niaee<br>Ravikirti<br>Mohan<br>Lopez-Medina<br>Gonzalez<br>Abd-Elsalam_3<br>Chahla<br>Vallejos | low risk of bias<br>low risk of bias<br>low risk of bias<br>low risk of bias<br>low risk of bias<br>probably high risk of bias<br>probably high risk of bias<br>probably high risk of bias<br>probably low risk of bias | probably high risk of bias<br>probably high risk of bias<br>low risk of bias<br>low risk of bias<br>low risk of bias<br>low risk of bias<br>probably high risk of bias<br>low risk of bias<br>low risk of bias | low risk of bias<br>low risk of bias | low risk of bias<br>probably low risk of bias<br>low risk of bias |                                                                                                                              |
| leflunomide                          | standard care/placebo                    | 8784<br>13540                                                                                                                               | Hu<br>Wang_5                                                                                                  | probably high risk of bias<br>probably high risk of bias                                                                                                                                                                | probably high risk of bias<br>probably high risk of bias                                                                                                                                                       | low risk of bias<br>low risk of bias                                                                                                                                             | low risk of bias<br>low risk of bias                                                                                                                                                                                 | probably low risk of bias<br>probably low risk of bias                                                                       |
| levamisole                           | standard care/placebo                    | 37198, Roostaei Firoz                                                                                                                       | Roostaei Firozabad                                                                                            | probably low risk of bias                                                                                                                                                                                               | low risk of bias                                                                                                                                                                                               | low risk of bias                                                                                                                                                                 | low risk of bias                                                                                                                                                                                                     | low risk of bias                                                                                                             |
| lopinavir-ritonavir                  | lopinavir-ritonavir, ribavirin           |                                                                                                                                             |                                                                                                               |                                                                                                                                                                                                                         |                                                                                                                                                                                                                |                                                                                                                                                                                  |                                                                                                                                                                                                                      |                                                                                                                              |

|                                |                       |                                                                                                                           |                                                                                |                                                                                                                                                   |                                                                                                                                                                                                      |                                                                                                                                                    |                                                                                                                                          |                                                                                                                                                              |
|--------------------------------|-----------------------|---------------------------------------------------------------------------------------------------------------------------|--------------------------------------------------------------------------------|---------------------------------------------------------------------------------------------------------------------------------------------------|------------------------------------------------------------------------------------------------------------------------------------------------------------------------------------------------------|----------------------------------------------------------------------------------------------------------------------------------------------------|------------------------------------------------------------------------------------------------------------------------------------------|--------------------------------------------------------------------------------------------------------------------------------------------------------------|
|                                |                       | 10067, 2615                                                                                                               | Huang_2                                                                        | probably high risk of bias                                                                                                                        | probably high risk of bias                                                                                                                                                                           | low risk of bias                                                                                                                                   | low risk of bias                                                                                                                         | low risk of bias                                                                                                                                             |
| lopinavir-ritonavir            | ribavirin             | 10067, 2615                                                                                                               | Huang_2                                                                        | probably high risk of bias                                                                                                                        | probably high risk of bias                                                                                                                                                                           | low risk of bias                                                                                                                                   | low risk of bias                                                                                                                         | low risk of bias                                                                                                                                             |
| lopinavir-ritonavir            | standard care/placebo | 330<br>1243, 234<br>14781, 14883<br>15632, Pan_lopinavir-ritonavir<br>Reis_1<br>45662, Ader_1<br>52697                    | Cao_1<br>Li<br>Horby_3<br>Pan_lopinavir-ritonavir<br>Reis_1<br>Ader_1<br>Arabi | low risk of bias<br>low risk of bias          | probably high risk of bias<br>probably high risk of bias<br>probably high risk of bias<br>probably high risk of bias<br>low risk of bias<br>probably high risk of bias<br>probably high risk of bias | low risk of bias<br>low risk of bias<br>low risk of bias<br>low risk of bias<br>probably high risk of bias<br>low risk of bias<br>low risk of bias | low risk of bias<br>low risk of bias | low risk of bias<br>probably low risk of bias<br>low risk of bias<br>low risk of bias<br>low risk of bias<br>low risk of bias<br>probably high risk of bias  |
| lopinavir-ritonavir            | umifenovir            | 1243, 234                                                                                                                 | Li                                                                             | low risk of bias                                                                                                                                  | probably high risk of bias                                                                                                                                                                           | low risk of bias                                                                                                                                   | low risk of bias                                                                                                                         | probably low risk of bias                                                                                                                                    |
| lopinavir-ritonavir, ribavirin | ribavirin             | 10067, 2615                                                                                                               | Huang_2                                                                        | probably high risk of bias                                                                                                                        | probably high risk of bias                                                                                                                                                                           | low risk of bias                                                                                                                                   | low risk of bias                                                                                                                         | low risk of bias                                                                                                                                             |
| lopinavir-ritonavir, ribavirin | standard care/placebo | 46308_severe                                                                                                              | Singh_3                                                                        | probably high risk of bias                                                                                                                        | probably high risk of bias                                                                                                                                                                           | low risk of bias                                                                                                                                   | low risk of bias                                                                                                                         | low risk of bias                                                                                                                                             |
| mavrilimumab                   | standard care/placebo | 36763                                                                                                                     | Cremer_2                                                                       | low risk of bias                                                                                                                                  | low risk of bias                                                                                                                                                                                     | low risk of bias                                                                                                                                   | low risk of bias                                                                                                                         | low risk of bias                                                                                                                                             |
| melatonin                      | standard care/placebo | Farnoosh<br>68591                                                                                                         | Farnoosh<br>Hasan                                                              | probably low risk of bias<br>probably high risk of bias                                                                                           | low risk of bias<br>probably high risk of bias                                                                                                                                                       | high risk of bias<br>low risk of bias                                                                                                              | low risk of bias<br>low risk of bias                                                                                                     | probably high risk of bias<br>probably low risk of bias                                                                                                      |
| methylene blue                 | standard care/placebo | 45012<br>Alamdari                                                                                                         | Hamidi-Alamdari<br>Alamdari                                                    | probably high risk of bias<br>probably high risk of bias                                                                                          | probably high risk of bias<br>probably high risk of bias                                                                                                                                             | low risk of bias<br>low risk of bias                                                                                                               | low risk of bias<br>low risk of bias                                                                                                     | low risk of bias<br>low risk of bias                                                                                                                         |
| molnupiravir                   | standard care/placebo | 41971<br>46473, Fischer<br>MOVE-OUT (MK4482-MOVE-OUT (MK4482-002<br>CR216-21<br>CTRI/2021/06/0339<br>HCR/III/MOLCOV/04/20 | Kho<br>Fischer<br>Vyas<br>Krishnan<br>Kumar_2                                  | probably high risk of bias<br>low risk of bias<br>probably low risk of bias<br>low risk of bias<br>low risk of bias<br>probably high risk of bias | high risk of bias<br>low risk of bias<br>low risk of bias<br>probably high risk of bias<br>probably high risk of bias<br>probably high risk of bias                                                  | low risk of bias<br>low risk of bias                               | low risk of bias<br>low risk of bias                     | probably high risk of bias<br>probably low risk of bias<br>Terminated early for benefit<br>low risk of bias<br>low risk of bias<br>probably low risk of bias |
| nanocurcumin                   | standard care/placebo | 16167<br>24721                                                                                                            | Valizadeh<br>Tahmasebi                                                         | probably low risk of bias<br>probably low risk of bias                                                                                            | low risk of bias<br>low risk of bias                                                                                                                                                                 | low risk of bias<br>low risk of bias                                                                                                               | low risk of bias<br>low risk of bias                                                                                                     | probably low risk of bias<br>probably low risk of bias                                                                                                       |
| niclosamide                    | standard care/placebo | Abdulmir_2                                                                                                                | Abdulmir_2                                                                     | probably high risk of bias                                                                                                                        | probably high risk of bias                                                                                                                                                                           | low risk of bias                                                                                                                                   | low risk of bias                                                                                                                         | low risk of bias                                                                                                                                             |
| nitazoxanide                   | standard care/placebo | 16339, 24799<br>50790, Blum<br>Silva<br>Rossignol                                                                         | Rocco<br>Blum<br>Silva<br>Rossignol                                            | low risk of bias<br>low risk of bias<br>low risk of bias<br>low risk of bias                                                                      | low risk of bias<br>low risk of bias<br>probably high risk of bias<br>low risk of bias                                                                                                               | low risk of bias<br>low risk of bias<br>low risk of bias<br>low risk of bias                                                                       | low risk of bias<br>low risk of bias<br>low risk of bias<br>low risk of bias                                                             | probably low risk of bias<br>low risk of bias<br>low risk of bias<br>probably low risk of bias                                                               |
| nitric oxide                   | standard care/placebo | Moni                                                                                                                      | Moni                                                                           | low risk of bias                                                                                                                                  | probably high risk of bias                                                                                                                                                                           | probably low risk of bias                                                                                                                          | low risk of bias                                                                                                                         | probably high risk of bias                                                                                                                                   |
| omega 3                        | standard care/placebo | 37721<br>60421                                                                                                            | Doaei<br>Kosmopoulos                                                           | low risk of bias<br>low risk of bias                                                                                                              | low risk of bias<br>probably high risk of bias                                                                                                                                                       | low risk of bias<br>low risk of bias                                                                                                               | low risk of bias<br>low risk of bias                                                                                                     | probably high risk of bias<br>probably low risk of bias                                                                                                      |
| opaganib                       | standard care/placebo | Winthrop                                                                                                                  | Winthrop                                                                       | low risk of bias                                                                                                                                  | low risk of bias                                                                                                                                                                                     | low risk of bias                                                                                                                                   | low risk of bias                                                                                                                         | low risk of bias                                                                                                                                             |
| peginterferon lambda           | standard care/placebo | 18418, 28233                                                                                                              | Feld                                                                           | low risk of bias                                                                                                                                  | low risk of bias                                                                                                                                                                                     | low risk of bias                                                                                                                                   | low risk of bias                                                                                                                         | probably low risk of bias                                                                                                                                    |

|                                             |                             |                           |                      |                            |                            |                           |                  |                              |
|---------------------------------------------|-----------------------------|---------------------------|----------------------|----------------------------|----------------------------|---------------------------|------------------|------------------------------|
| pentoxifylline                              | standard care/placebo       | 21098                     | Malonado             | probably high risk of bias | probably high risk of bias | high risk of bias         | low risk of bias | probably low risk of bias    |
|                                             |                             | 67125                     | Azizi                | probably low risk of bias  | low risk of bias           | high risk of bias         | low risk of bias | low risk of bias             |
| polymerized type I collagen                 | standard care/placebo       |                           |                      |                            |                            |                           |                  |                              |
|                                             |                             | Méndez-Flores             | Méndez-Flores        | probably low risk of bias  | low risk of bias           | low risk of bias          | low risk of bias | probably low risk of bias    |
| probiotics                                  | standard care/placebo       |                           |                      |                            |                            |                           |                  |                              |
|                                             |                             | 44556                     | Gutiérrez-Castrellón | low risk of bias           | low risk of bias           | low risk of bias          | low risk of bias | low risk of bias             |
|                                             |                             | 68436                     | Ivashkin             | probably high risk of bias | probably high risk of bias | low risk of bias          | low risk of bias | low risk of bias             |
| progesterone                                | standard care/placebo       | 32075, Ghandehari         | Ghandehari           | probably high risk of bias | probably high risk of bias | low risk of bias          | low risk of bias | low risk of bias             |
| proxalutamide                               | standard care/placebo       |                           |                      |                            |                            |                           |                  |                              |
|                                             |                             | Cadegiani (proxalutamide) | Cadegiani_2          | probably low risk of bias  | low risk of bias           | low risk of bias          | low risk of bias | probably low risk of bias    |
|                                             |                             | 48943                     | Cadegiani_5          | high risk of bias          | probably high risk of bias | low risk of bias          | low risk of bias | low risk of bias             |
|                                             |                             | Cadegiani (female cohort) | Cadegiani_4          | high risk of bias          | low risk of bias           | low risk of bias          | low risk of bias | probably low risk of bias    |
|                                             |                             |                           |                      |                            |                            |                           |                  | Terminated early for benefit |
| pyridostigmine                              | standard care/placebo       |                           |                      |                            |                            |                           |                  |                              |
|                                             |                             | Fragoso-Saavedra          | Fragoso-Saavedra     | probably low risk of bias  | low risk of bias           | low risk of bias          | low risk of bias | low risk of bias             |
| quercetin                                   | standard care/placebo       |                           |                      |                            |                            |                           |                  |                              |
|                                             |                             | 49941                     | Di Pierro_1          | probably high risk of bias | probably high risk of bias | low risk of bias          | low risk of bias | probably low risk of bias    |
|                                             |                             | 51397                     | Di Pierro_2          | probably high risk of bias | probably high risk of bias | low risk of bias          | low risk of bias | probably high risk of bias   |
| ravdasvir, sofosbuvir                       | standard care/placebo       | 57630                     | Abbass               | low risk of bias           | probably high risk of bias | low risk of bias          | low risk of bias | probably low risk of bias    |
| human granulocyte colony-stimulating factor | standard care/placebo       | 12705                     | Cheng                | low risk of bias           | probably high risk of bias | low risk of bias          | low risk of bias | probably low risk of bias    |
| remdesivir                                  | standard care/placebo       |                           |                      |                            |                            |                           |                  |                              |
|                                             |                             | 2408                      | Wang_1               | low risk of bias           | low risk of bias           | low risk of bias          | low risk of bias | low risk of bias             |
|                                             |                             | 11347                     | Spinner              | low risk of bias           | high risk of bias          | probably low risk of bias | low risk of bias | low risk of bias             |
|                                             |                             | 15633, 3821               | Beigel               | low risk of bias           | low risk of bias           | low risk of bias          | low risk of bias | low risk of bias             |
|                                             |                             | 15632, Pan_remedesivir    | Pan_remedesivir      | low risk of bias           | probably high risk of bias | low risk of bias          | low risk of bias | low risk of bias             |
|                                             |                             | 37778                     | Mahajan              | high risk of bias          | probably high risk of bias | low risk of bias          | low risk of bias | probably low risk of bias    |
|                                             |                             | 39725                     | Criner               | probably high risk of bias | probably high risk of bias | low risk of bias          | low risk of bias | probably high risk of bias   |
|                                             |                             | Ader (remdesivir)         | Ader_2               | low risk of bias           | probably high risk of bias | low risk of bias          | low risk of bias | low risk of bias             |
|                                             |                             | 68059                     | Abd-Elisalam_4       | low risk of bias           | probably high risk of bias | low risk of bias          | low risk of bias | low risk of bias             |
|                                             |                             | Gottlieb_2, PINETR        | Gottlieb_2           | probably low risk of bias  | low risk of bias           | low risk of bias          | low risk of bias | low risk of bias             |
| resveratrol                                 | standard care/placebo       | 65305                     | McCreary             | low risk of bias           | low risk of bias           | low risk of bias          | low risk of bias | probably low risk of bias    |
| ribavirin, sofosbuvir-daclatasvir           | standard care/placebo       | 11010                     | Kasgari              | low risk of bias           | probably high risk of bias | low risk of bias          | low risk of bias | probably low risk of bias    |
| secukinumab                                 | standard care/placebo       | Resende                   | Resende              | probably high risk of bias | probably high risk of bias | low risk of bias          | low risk of bias | low risk of bias             |
| serine protease inhibitors                  | standard care/placebo       |                           |                      |                            |                            |                           |                  |                              |
|                                             |                             | 40853                     | Gunst                | low risk of bias           | low risk of bias           | low risk of bias          | low risk of bias | low risk of bias             |
|                                             |                             | 70176                     | Zhuravel             | low risk of bias           | probably high risk of bias | low risk of bias          | low risk of bias | low risk of bias             |
| sildenafil                                  | standard care/placebo       |                           |                      |                            |                            |                           |                  |                              |
|                                             |                             | Santamarina               | Santamarina          | low risk of bias           | low risk of bias           | probably low risk of bias | low risk of bias | probably low risk of bias    |
| sitagliptin                                 | sitagliptin, spironolactone | Abbasi                    | Abbasi               | probably high risk of bias | probably high risk of bias | low risk of bias          | low risk of bias | probably low risk of bias    |
| sitagliptin                                 | spironolactone              | Abbasi                    | Abbasi               | probably high risk of bias | probably high risk of bias | low risk of bias          | low risk of bias | probably low risk of bias    |
| sitagliptin                                 | standard care/placebo       | Abbasi                    | Abbasi               | probably high risk of bias | probably high risk of bias | low risk of bias          | low risk of bias | probably low risk of bias    |

|                             |                       |                                                                               |                                                                           |                                                                                                                                          |                                                                                                                                                                        |                                                                                                                      |                                                                                                                      |                                                                                                                                                            |
|-----------------------------|-----------------------|-------------------------------------------------------------------------------|---------------------------------------------------------------------------|------------------------------------------------------------------------------------------------------------------------------------------|------------------------------------------------------------------------------------------------------------------------------------------------------------------------|----------------------------------------------------------------------------------------------------------------------|----------------------------------------------------------------------------------------------------------------------|------------------------------------------------------------------------------------------------------------------------------------------------------------|
| sitagliptin, spironolactone | spironolactone        | Abbasi                                                                        | Abbasi                                                                    | probably high risk of bias                                                                                                               | probably high risk of bias                                                                                                                                             | low risk of bias                                                                                                     | low risk of bias                                                                                                     | probably low risk of bias                                                                                                                                  |
| sitagliptin, spironolactone | standard care/placebo | Abbasi                                                                        | Abbasi                                                                    | probably high risk of bias                                                                                                               | probably high risk of bias                                                                                                                                             | low risk of bias                                                                                                     | low risk of bias                                                                                                     | probably low risk of bias                                                                                                                                  |
| spironolactone              | standard care/placebo | Abbasi                                                                        | Abbasi                                                                    | probably high risk of bias                                                                                                               | probably high risk of bias                                                                                                                                             | low risk of bias                                                                                                     | low risk of bias                                                                                                     | probably low risk of bias                                                                                                                                  |
| statins                     | standard care/placebo | Ghati                                                                         | Ghati                                                                     | probably high risk of bias                                                                                                               | probably high risk of bias                                                                                                                                             | low risk of bias                                                                                                     | low risk of bias                                                                                                     | low risk of bias                                                                                                                                           |
| sulodexide                  | standard care/placebo | 21816, 34575                                                                  | Gonzalez-Ochoa                                                            | probably low risk of bias                                                                                                                | low risk of bias                                                                                                                                                       | low risk of bias                                                                                                     | low risk of bias                                                                                                     | low risk of bias                                                                                                                                           |
| synthetic VIP               | standard care/placebo | 38756                                                                         | Youssef                                                                   | probably low risk of bias                                                                                                                | low risk of bias                                                                                                                                                       | low risk of bias                                                                                                     | low risk of bias                                                                                                     | low risk of bias                                                                                                                                           |
| thalidomide                 | standard care/placebo | Amra                                                                          | Amra                                                                      | probably high risk of bias                                                                                                               | probably high risk of bias                                                                                                                                             | probably high risk of bias                                                                                           | low risk of bias                                                                                                     | low risk of bias                                                                                                                                           |
| triazavirin                 | standard care/placebo | 12679                                                                         | Wu                                                                        | high risk of bias                                                                                                                        | probably high risk of bias                                                                                                                                             | low risk of bias                                                                                                     | low risk of bias                                                                                                     | probably low risk of bias                                                                                                                                  |
| tyrosine kinase inhibitors  | standard care/placebo | 49287<br>60872                                                                | Aman<br>Strich                                                            | low risk of bias<br>probably low risk of bias                                                                                            | low risk of bias<br>low risk of bias                                                                                                                                   | low risk of bias<br>low risk of bias                                                                                 | low risk of bias<br>low risk of bias                                                                                 | low risk of bias<br>low risk of bias                                                                                                                       |
| umifenovir                  | standard care/placebo | 1243, 234<br>12798<br>24810<br>35511<br>52841<br>Ramachandran                 | Li<br>Yethindra<br>Yadegarinia<br>Khodashahi<br>Darazam_3<br>Ramachandran | low risk of bias<br>probably high risk of bias<br>high risk of bias<br>probably low risk of bias<br>low risk of bias<br>low risk of bias | probably high risk of bias<br>probably high risk of bias<br>probably high risk of bias<br>probably high risk of bias<br>probably high risk of bias<br>low risk of bias | low risk of bias<br>low risk of bias | low risk of bias<br>low risk of bias | probably low risk of bias<br>probably low risk of bias<br>probably high risk of bias<br>low risk of bias<br>probably high risk of bias<br>low risk of bias |
| vilobelimab                 | standard care/placebo | 14404, 9802                                                                   | Vlaar                                                                     | probably high risk of bias                                                                                                               | probably high risk of bias                                                                                                                                             | low risk of bias                                                                                                     | low risk of bias                                                                                                     | probably low risk of bias                                                                                                                                  |
| vitamin C                   | standard care/placebo | 26123, Zhang<br>25793<br>31401, JamalIMoghadamtamaliMoghadamSiahkali<br>31458 | Zhang_1<br>Kumari<br>Thomas                                               | low risk of bias<br>probably high risk of bias<br>probably high risk of bias<br>low risk of bias                                         | low risk of bias<br>probably high risk of bias<br>probably high risk of bias<br>probably high risk of bias                                                             | low risk of bias<br>low risk of bias<br>low risk of bias<br>probably high risk of bias                               | low risk of bias<br>low risk of bias<br>low risk of bias<br>low risk of bias                                         | probably low risk of bias<br>probably low risk of bias<br>probably low risk of bias<br>probably low risk of bias                                           |
| vitamin C                   | vitamin C, zinc       | 31458                                                                         | Thomas                                                                    | low risk of bias                                                                                                                         | probably high risk of bias                                                                                                                                             | probably high risk of bias                                                                                           | low risk of bias                                                                                                     | probably low risk of bias                                                                                                                                  |
| vitamin C                   | zinc                  | 31458                                                                         | Thomas                                                                    | low risk of bias                                                                                                                         | probably high risk of bias                                                                                                                                             | probably high risk of bias                                                                                           | low risk of bias                                                                                                     | probably low risk of bias                                                                                                                                  |
| vitamin C, vitamin E        | standard care/placebo | 68016                                                                         | Hakamifard                                                                | probably high risk of bias                                                                                                               | probably high risk of bias                                                                                                                                             | low risk of bias                                                                                                     | low risk of bias                                                                                                     | low risk of bias                                                                                                                                           |
| vitamin C, zinc             | standard care/placebo | 31458                                                                         | Thomas                                                                    | low risk of bias                                                                                                                         | probably high risk of bias                                                                                                                                             | probably high risk of bias                                                                                           | low risk of bias                                                                                                     | probably low risk of bias                                                                                                                                  |
| vitamin C, zinc             | zinc                  | 31458                                                                         | Thomas                                                                    | low risk of bias                                                                                                                         | probably high risk of bias                                                                                                                                             | probably high risk of bias                                                                                           | low risk of bias                                                                                                     | probably low risk of bias                                                                                                                                  |
| vitamin D                   | standard care/placebo | 11879<br>18947, 31936<br>44830<br>46627                                       | Castillo<br>Murai<br>Lakkireddy<br>Elamir                                 | probably high risk of bias<br>probably low risk of bias<br>high risk of bias<br>probably high risk of bias                               | probably high risk of bias<br>low risk of bias<br>probably high risk of bias<br>probably high risk of bias                                                             | low risk of bias<br>low risk of bias<br>low risk of bias<br>low risk of bias                                         | low risk of bias<br>low risk of bias<br>low risk of bias<br>low risk of bias                                         | low risk of bias<br>low risk of bias<br>low risk of bias<br>probably low risk of bias                                                                      |
| xiyanping                   | standard care/placebo | 43229                                                                         | Zhang_3                                                                   | low risk of bias                                                                                                                         | probably high risk of bias                                                                                                                                             | low risk of bias                                                                                                     | low risk of bias                                                                                                     | probably low risk of bias                                                                                                                                  |

|      |                       |       |         |                           |                            |                            |                  |                           |  |
|------|-----------------------|-------|---------|---------------------------|----------------------------|----------------------------|------------------|---------------------------|--|
| zinc | standard care/placebo |       |         |                           |                            |                            |                  |                           |  |
|      |                       | 34745 | Patel_1 | probably low risk of bias | low risk of bias           | low risk of bias           | low risk of bias | low risk of bias          |  |
|      |                       | 31458 | Thomas  | low risk of bias          | probably high risk of bias | probably high risk of bias | low risk of bias | probably low risk of bias |  |

| Mechanical Ventilation                      |                                      |                                 |                        |                            |                              |                      |                        |                           |       |
|---------------------------------------------|--------------------------------------|---------------------------------|------------------------|----------------------------|------------------------------|----------------------|------------------------|---------------------------|-------|
| Treatment 1                                 | Treatment 2                          | Trial                           | First author           | Randomization              | Deviations from the intended | Missing outcome data | Measurement of outcome | Selection of the reported | Other |
| (acetyl)cysteine                            | standard care/placebo                | 13687                           | de Alencar             | low risk of bias           | low risk of bias             | low risk of bias     | low risk of bias       | low risk of bias          |       |
|                                             |                                      | 48051                           | Taher                  | probably low risk of bias  | low risk of bias             | low risk of bias     | low risk of bias       | low risk of bias          |       |
| 2-deoxy-D-glucose                           | standard care/placebo                | 66751a                          | Narayan Bhatt          | probably high risk of bias | high risk of bias            | low risk of bias     | low risk of bias       | low risk of bias          |       |
| 5-alpha reductase inhibitor                 | standard care/placebo                | 19047, 33978, Cadegiani, Cadegi | Cadegiani_1            | probably low risk of bias  | low risk of bias             | high risk of bias    | low risk of bias       | probably low risk of bias |       |
| ACEi/ARB                                    | calcium channel blockers             | 34054                           | Nouri-Vaskeh           | low risk of bias           | low risk of bias             | low risk of bias     | low risk of bias       | probably low risk of bias |       |
| ACEi/ARB                                    | standard care/placebo                | 10463, 49441                    | Duarte                 | probably high risk of bias | probably high risk of bias   | low risk of bias     | low risk of bias       | low risk of bias          |       |
|                                             |                                      | 26081                           | Cohen                  | low risk of bias           | probably high risk of bias   | low risk of bias     | low risk of bias       | probably low risk of bias |       |
|                                             |                                      | 27349                           | Lopes_1                | low risk of bias           | probably high risk of bias   | low risk of bias     | low risk of bias       | low risk of bias          |       |
|                                             |                                      | 49084, Puskarich                | Puskarich              | low risk of bias           | low risk of bias             | low risk of bias     | low risk of bias       | probably low risk of bias |       |
|                                             |                                      | 43232                           | Geriak                 | probably high risk of bias | probably high risk of bias   | low risk of bias     | low risk of bias       | low risk of bias          |       |
|                                             |                                      | 48571                           | Bauer                  | low risk of bias           | high risk of bias            | low risk of bias     | low risk of bias       | low risk of bias          |       |
|                                             |                                      | Puskarich_inpatient             | Puskarich_2            | low risk of bias           | low risk of bias             | low risk of bias     | low risk of bias       | probably low risk of bias |       |
| AFO-202 beta glucan                         | beta-glucans                         | 65044                           | Raghavan               | probably high risk of bias | probably high risk of bias   | low risk of bias     | low risk of bias       | low risk of bias          |       |
| AFO-202 beta glucan                         | standard care/placebo                | 65044                           | Raghavan               | probably high risk of bias | probably high risk of bias   | low risk of bias     | low risk of bias       | low risk of bias          |       |
| CCK-A agonist and CCK-B antagonist          | standard care/placebo                | Lattmann                        | Lattmann               | probably high risk of bias | probably high risk of bias   | low risk of bias     | low risk of bias       | low risk of bias          |       |
| GM-CSF inhibitor                            | standard care/placebo                | 47226a                          | Fisher_1               | low risk of bias           | probably high risk of bias   | low risk of bias     | low risk of bias       | low risk of bias          |       |
| IL1 inhibitors                              | standard care/placebo                | 28284                           | IMUNO-19 Collaborative | low risk of bias           | probably high risk of bias   | low risk of bias     | low risk of bias       | low risk of bias          |       |
|                                             |                                      | Kyriazopoulou                   | Kyriazopoulou          | low risk of bias           | low risk of bias             | low risk of bias     | low risk of bias       | low risk of bias          |       |
|                                             |                                      | 54072                           | Caricchio              | low risk of bias           | low risk of bias             | low risk of bias     | low risk of bias       | low risk of bias          |       |
| IL6 receptor antagonist                     | standard care/placebo                | 66149                           | Lomakin                | low risk of bias           | low risk of bias             | low risk of bias     | low risk of bias       | low risk of bias          |       |
| IL6 receptor antagonists                    | L6 receptor antagonists, favipiravir | 25294, Zhao_1                   | Zhao_1                 | probably high risk of bias | probably high risk of bias   | low risk of bias     | low risk of bias       | probably low risk of bias |       |
| IL6 receptor antagonists                    | favipiravir                          | 25294, Zhao_1                   | Zhao_1                 | probably high risk of bias | probably high risk of bias   | low risk of bias     | low risk of bias       | probably low risk of bias |       |
| IL6 receptor antagonists                    | standard care/placebo                | 33303_B, Rosas                  | Rosas_B                | low risk of bias           | probably high risk of bias   | low risk of bias     | low risk of bias       | low risk of bias          |       |
|                                             |                                      | 16128                           | Hermine                | low risk of bias           | probably high risk of bias   | low risk of bias     | low risk of bias       | probably low risk of bias |       |
|                                             |                                      | 16127                           | Salvarani              | low risk of bias           | probably high risk of bias   | low risk of bias     | low risk of bias       | probably low risk of bias |       |
|                                             |                                      | 16283                           | Stone                  | probably low risk of bias  | low risk of bias             | low risk of bias     | low risk of bias       | low risk of bias          |       |
| 5 receptor antagonists, corticosteroid      | standard care/placebo                | 47857                           | Hamed                  | probably high risk of bias | probably high risk of bias   | low risk of bias     | low risk of bias       | probably low risk of bias |       |
| 5 receptor antagonists, corticosteroids (sy | standard care/placebo                | 33303_A, Rosas                  | Rosas_A                | low risk of bias           | probably high risk of bias   | low risk of bias     | low risk of bias       | low risk of bias          |       |
|                                             |                                      | 16340, 23643                    | Salama                 | probably low risk of bias  | low risk of bias             | low risk of bias     | low risk of bias       | probably low risk of bias |       |
|                                             |                                      | 33304, Gordon_v1, Gori          | Gordon_1               | low risk of bias           | probably high risk of bias   | low risk of bias     | low risk of bias       | low risk of bias          |       |
|                                             |                                      | 27470                           | Veiga                  | low risk of bias           | probably high risk of bias   | low risk of bias     | low risk of bias       | low risk of bias          |       |
|                                             |                                      | 29298, 34438                    | Lescure                | low risk of bias           | low risk of bias             | low risk of bias     | low risk of bias       | low risk of bias          |       |
|                                             |                                      | 34439                           | Soin                   | probably high risk of bias | probably high risk of bias   | low risk of bias     | low risk of bias       | low risk of bias          |       |

|                                       |                                     |                                                       |                                                  |                            |                            |                  |                  |                            |
|---------------------------------------|-------------------------------------|-------------------------------------------------------|--------------------------------------------------|----------------------------|----------------------------|------------------|------------------|----------------------------|
|                                       |                                     | Rutgers<br>Talaschian<br>Hermine_toci<br>30638, 42047 | Rutgers<br>Talaschian<br>Hermine_toci<br>Horby_5 | probably high risk of bias | probably high risk of bias | low risk of bias | low risk of bias | probably low risk of bias  |
|                                       |                                     |                                                       |                                                  | probably low risk of bias  | low risk of bias           | low risk of bias | low risk of bias | low risk of bias           |
|                                       |                                     |                                                       |                                                  | probably high risk of bias | probably high risk of bias | low risk of bias | low risk of bias | low risk of bias           |
|                                       |                                     |                                                       |                                                  | low risk of bias           | probably high risk of bias | low risk of bias | low risk of bias | low risk of bias           |
| IL6 receptor antagonists, favipiravir | favipiravir                         | 25294, Zhao_1                                         | Zhao_1                                           | probably high risk of bias | probably high risk of bias | low risk of bias | low risk of bias | probably low risk of bias  |
| JAK inhibitors                        | standard care/placebo               | 4161<br>Kalil                                         | Cao_2<br>Kalil                                   | low risk of bias           | probably high risk of bias | low risk of bias | low risk of bias | probably low risk of bias  |
|                                       |                                     | 62263, Marconi, Marco                                 | Marconi                                          | low risk of bias           | low risk of bias           | low risk of bias | low risk of bias | low risk of bias           |
|                                       |                                     | 48879                                                 | Guimarães                                        | low risk of bias           | low risk of bias           | low risk of bias | low risk of bias | low risk of bias           |
|                                       |                                     | RUXCOVID                                              | RUXCOVID                                         | low risk of bias           | low risk of bias           | low risk of bias | low risk of bias | low risk of bias           |
| NSAID, azithromycin                   | NSAID, azithromycin, corticosteroid | 64198                                                 | Ghanei                                           | low risk of bias           | probably high risk of bias | low risk of bias | low risk of bias | probably low risk of bias  |
| NSAID, azithromycin                   | lopinavir-ritonavir                 | 64198                                                 | Ghanei                                           | low risk of bias           | probably high risk of bias | low risk of bias | low risk of bias | probably low risk of bias  |
| NSAID, azithromycin, corticosteroid   | lopinavir-ritonavir                 | 64198                                                 | Ghanei                                           | low risk of bias           | probably high risk of bias | low risk of bias | low risk of bias | probably low risk of bias  |
| SGLT2 inhibitors                      | standard care/placebo               | 54586                                                 | Kosiborod                                        | low risk of bias           | low risk of bias           | low risk of bias | low risk of bias | low risk of bias           |
| TNF inhibitors                        | standard care/placebo               | 47226b<br>52260                                       | Fisher_2<br>Fakharian                            | low risk of bias           | probably high risk of bias | low risk of bias | low risk of bias | low risk of bias           |
|                                       |                                     |                                                       |                                                  | probably high risk of bias | probably high risk of bias | low risk of bias | low risk of bias | low risk of bias           |
| s, curcuminoids, piperine, resveratrc | standard care/placebo               | 67818                                                 | Majeed                                           | probably low risk of bias  | low risk of bias           | low risk of bias | low risk of bias | probably low risk of bias  |
| angiotensin type 2 receptor agonist   | standard care/placebo               | 28441                                                 | Tornling                                         | probably low risk of bias  | low risk of bias           | low risk of bias | low risk of bias | low risk of bias           |
| antihhepaciviral                      | ravidasvir, sofosbuvir              | 57630                                                 | Abbass                                           | low risk of bias           | probably high risk of bias | low risk of bias | low risk of bias | probably low risk of bias  |
| antihhepaciviral                      | standard care/placebo               | 11065<br>Yakoot                                       | Sadeghi<br>Yakoot                                | probably high risk of bias | high risk of bias          | low risk of bias | low risk of bias | probably high risk of bias |
|                                       |                                     | 29517                                                 | Nourian                                          | low risk of bias           | probably high risk of bias | low risk of bias | low risk of bias | low risk of bias           |
|                                       |                                     | Mobarak                                               | Mobarak                                          | probably low risk of bias  | low risk of bias           | low risk of bias | low risk of bias | probably low risk of bias  |
|                                       |                                     | 45668                                                 | Sayad                                            | low risk of bias           | probably high risk of bias | low risk of bias | low risk of bias | probably low risk of bias  |
|                                       |                                     | 51681                                                 | El-Bendary                                       | probably high risk of bias | probably high risk of bias | low risk of bias | low risk of bias | probably low risk of bias  |
|                                       |                                     | 57630                                                 | Abbass                                           | low risk of bias           | probably high risk of bias | low risk of bias | low risk of bias | probably low risk of bias  |
| aspirin                               | aspirin, atorvastatin               | Ghati                                                 | Ghati                                            | probably high risk of bias | probably high risk of bias | low risk of bias | low risk of bias | probably low risk of bias  |
| aspirin                               | standard care/placebo               | Ghati<br>Horby_7                                      | Ghati<br>Horby_7                                 | probably high risk of bias | probably high risk of bias | low risk of bias | low risk of bias | probably low risk of bias  |
|                                       |                                     |                                                       |                                                  | low risk of bias           | probably high risk of bias | low risk of bias | low risk of bias | low risk of bias           |
| aspirin                               | statins                             | Ghati                                                 | Ghati                                            | probably high risk of bias | probably high risk of bias | low risk of bias | low risk of bias | probably low risk of bias  |
| aspirin, atorvastatin                 | standard care/placebo               | Ghati                                                 | Ghati                                            | probably high risk of bias | probably high risk of bias | low risk of bias | low risk of bias | probably low risk of bias  |
| aspirin, atorvastatin                 | statins                             | Ghati                                                 | Ghati                                            | probably high risk of bias | probably high risk of bias | low risk of bias | low risk of bias | probably low risk of bias  |
| atazanavir, dolutegravir, ritonavir   | lopinavir-ritonavir                 |                                                       |                                                  |                            |                            |                  |                  |                            |

|                                           |                                              |                                                         |                                                                         |                                                                                                            |                                                                                                                                                    |                                                                                                  |                                                                                                  |                                                                                                           |
|-------------------------------------------|----------------------------------------------|---------------------------------------------------------|-------------------------------------------------------------------------|------------------------------------------------------------------------------------------------------------|----------------------------------------------------------------------------------------------------------------------------------------------------|--------------------------------------------------------------------------------------------------|--------------------------------------------------------------------------------------------------|-----------------------------------------------------------------------------------------------------------|
|                                           |                                              | 53056                                                   | Kalantari                                                               | probably high risk of bias                                                                                 | high risk of bias                                                                                                                                  | low risk of bias                                                                                 | low risk of bias                                                                                 | probably low risk of bias                                                                                 |
| azithromycin                              | hydroxychloroquine                           | 18375                                                   | Brown                                                                   | low risk of bias                                                                                           | high risk of bias                                                                                                                                  | low risk of bias                                                                                 | low risk of bias                                                                                 | low risk of bias                                                                                          |
| azithromycin                              | standard care/placebo                        | 11639, 12378<br>12439<br>22569, 29803<br>34434<br>40804 | Sekhaviati<br>Furtado<br>Horby_4<br>COLE Trial Collaborative C<br>Hinks | probably high risk of bias<br>low risk of bias<br>low risk of bias<br>low risk of bias<br>low risk of bias | probably high risk of bias<br>probably high risk of bias<br>probably high risk of bias<br>probably high risk of bias<br>probably high risk of bias | low risk of bias<br>low risk of bias<br>low risk of bias<br>low risk of bias<br>low risk of bias | low risk of bias<br>low risk of bias<br>low risk of bias<br>low risk of bias<br>low risk of bias | probably low risk of bias<br>low risk of bias<br>low risk of bias<br>low risk of bias<br>low risk of bias |
| azithromycin, hydroxychloroquine          | hydroxychloroquine                           | 22152, 9166                                             | Cavalcanti                                                              | low risk of bias                                                                                           | probably high risk of bias                                                                                                                         | low risk of bias                                                                                 | low risk of bias                                                                                 | low risk of bias                                                                                          |
| azithromycin, hydroxychloroquine          | standard care/placebo                        | 22152, 9166<br>48002                                    | Cavalcanti<br>Sivapalan                                                 | low risk of bias<br>low risk of bias                                                                       | probably high risk of bias<br>low risk of bias                                                                                                     | low risk of bias<br>low risk of bias                                                             | low risk of bias<br>low risk of bias                                                             | low risk of bias<br>low risk of bias                                                                      |
| baloxavir marboxil                        | favipiravir                                  | 2637, Lou, Lou (1                                       | Lou                                                                     | low risk of bias                                                                                           | probably high risk of bias                                                                                                                         | low risk of bias                                                                                 | low risk of bias                                                                                 | low risk of bias                                                                                          |
| baloxavir marboxil                        | standard care/placebo                        | 2637, Lou, Lou (1                                       | Lou                                                                     | low risk of bias                                                                                           | probably high risk of bias                                                                                                                         | low risk of bias                                                                                 | low risk of bias                                                                                 | low risk of bias                                                                                          |
| beta-glucans                              | standard care/placebo                        | 65044                                                   | Raghavan                                                                | probably high risk of bias                                                                                 | probably high risk of bias                                                                                                                         | low risk of bias                                                                                 | low risk of bias                                                                                 | low risk of bias                                                                                          |
| bromhexine hydrochloride                  | standard care/placebo                        | 12212<br>13888<br>35697                                 | Li_3<br>Ansarin<br>Tolouian                                             | low risk of bias<br>probably high risk of bias<br>probably high risk of bias                               | probably high risk of bias<br>probably high risk of bias<br>probably high risk of bias                                                             | low risk of bias<br>low risk of bias<br>probably low risk of bias                                | low risk of bias<br>low risk of bias<br>low risk of bias                                         | low risk of bias<br>low risk of bias<br>probably low risk of bias                                         |
| cacifiediol                               | standard care/placebo                        | 68593                                                   | Maghbooli                                                               | low risk of bias                                                                                           | low risk of bias                                                                                                                                   | probably high risk of bias                                                                       | low risk of bias                                                                                 | low risk of bias                                                                                          |
| calcium release-activated calcium inhibi  | standard care/placebo                        | 10964                                                   | Miller                                                                  | probably high risk of bias                                                                                 | high risk of bias                                                                                                                                  | low risk of bias                                                                                 | low risk of bias                                                                                 | probably high risk of bias                                                                                |
| colchicine                                | standard care/placebo                        | 7189<br>28222, 45870<br>Horby_6<br>64351<br>64385       | Deftereos<br>Tardif<br>Horby_6<br>Dorward<br>Pascual-Figal              | low risk of bias<br>probably low risk of bias<br>low risk of bias<br>low risk of bias<br>low risk of bias  | probably high risk of bias<br>low risk of bias<br>probably high risk of bias<br>probably high risk of bias<br>probably high risk of bias           | low risk of bias<br>low risk of bias<br>low risk of bias<br>low risk of bias<br>low risk of bias | low risk of bias<br>low risk of bias<br>low risk of bias<br>low risk of bias<br>low risk of bias | low risk of bias<br>low risk of bias<br>low risk of bias<br>low risk of bias<br>low risk of bias          |
| colchicine, emtricitabine, tenofovir, sta | emtricitabine, tenofovir                     | Gaitan-Duarte                                           | Gaitan-Duarte                                                           | low risk of bias                                                                                           | probably high risk of bias                                                                                                                         | low risk of bias                                                                                 | low risk of bias                                                                                 | low risk of bias                                                                                          |
| colchicine, emtricitabine, tenofovir, sta | standard care/placebo                        | Gaitan-Duarte                                           | Gaitan-Duarte                                                           | low risk of bias                                                                                           | probably high risk of bias                                                                                                                         | low risk of bias                                                                                 | low risk of bias                                                                                 | low risk of bias                                                                                          |
| colchicine, statin                        | colchicine, emtricitabine, tenofovir, statin | Gaitan-Duarte                                           | Gaitan-Duarte                                                           | low risk of bias                                                                                           | probably high risk of bias                                                                                                                         | low risk of bias                                                                                 | low risk of bias                                                                                 | low risk of bias                                                                                          |
| colchicine, statin                        | emtricitabine, tenofovir                     | Gaitan-Duarte                                           | Gaitan-Duarte                                                           | low risk of bias                                                                                           | probably high risk of bias                                                                                                                         | low risk of bias                                                                                 | low risk of bias                                                                                 | low risk of bias                                                                                          |
| colchicine, statin                        | standard care/placebo                        | Gaitan-Duarte                                           | Gaitan-Duarte                                                           | low risk of bias                                                                                           | probably high risk of bias                                                                                                                         | low risk of bias                                                                                 | low risk of bias                                                                                 | low risk of bias                                                                                          |
| corticosteroids (systemic)                | standard care/placebo                        | 29672, 6743<br>33381, 7002, 861<br>10699<br>12062       | Corral-Gudino<br>Horby_1<br>Jeronimo<br>Dequin                          | low risk of bias<br>low risk of bias<br>low risk of bias<br>low risk of bias                               | probably high risk of bias<br>probably high risk of bias<br>low risk of bias<br>low risk of bias                                                   | low risk of bias<br>low risk of bias<br>high risk of bias<br>low risk of bias                    | low risk of bias<br>low risk of bias<br>low risk of bias<br>low risk of bias                     | low risk of bias<br>low risk of bias<br>low risk of bias<br>low risk of bias                              |

|                                        |                                       |                                                                                              |                                                                                     |                                                                                                                                                                                  |                                                                                                                                                                                              |                                                                                                                                          |                                                                                                                                          |                                                                                                                                                                              |
|----------------------------------------|---------------------------------------|----------------------------------------------------------------------------------------------|-------------------------------------------------------------------------------------|----------------------------------------------------------------------------------------------------------------------------------------------------------------------------------|----------------------------------------------------------------------------------------------------------------------------------------------------------------------------------------------|------------------------------------------------------------------------------------------------------------------------------------------|------------------------------------------------------------------------------------------------------------------------------------------|------------------------------------------------------------------------------------------------------------------------------------------------------------------------------|
|                                        |                                       | 12141                                                                                        | Tomazini                                                                            | low risk of bias                                                                                                                                                                 | probably high risk of bias                                                                                                                                                                   | low risk of bias                                                                                                                         | low risk of bias                                                                                                                         | low risk of bias                                                                                                                                                             |
|                                        |                                       | 12146                                                                                        | Angus                                                                               | probably high risk of bias                                                                                                                                                       | probably high risk of bias                                                                                                                                                                   | low risk of bias                                                                                                                         | low risk of bias                                                                                                                         | low risk of bias                                                                                                                                                             |
|                                        |                                       | 13208                                                                                        | Edalatifard                                                                         | probably high risk of bias                                                                                                                                                       | probably high risk of bias                                                                                                                                                                   | probably high risk of bias                                                                                                               | low risk of bias                                                                                                                         | low risk of bias                                                                                                                                                             |
|                                        |                                       | 2                                                                                            | Farahani                                                                            | probably low risk of bias                                                                                                                                                        | probably low risk of bias                                                                                                                                                                    | low risk of bias                                                                                                                         | low risk of bias                                                                                                                         | probably low risk of bias                                                                                                                                                    |
|                                        |                                       | 31583                                                                                        | Jamaati                                                                             | probably high risk of bias                                                                                                                                                       | probably high risk of bias                                                                                                                                                                   | low risk of bias                                                                                                                         | low risk of bias                                                                                                                         | low risk of bias                                                                                                                                                             |
|                                        |                                       | 27641                                                                                        | Tang_2                                                                              | probably low risk of bias                                                                                                                                                        | probably high risk of bias                                                                                                                                                                   | low risk of bias                                                                                                                         | low risk of bias                                                                                                                         | probably low risk of bias                                                                                                                                                    |
| corticosteroids (systemic), tacrolimus | standard care/placebo                 | 51435                                                                                        | Solanich                                                                            | probably high risk of bias                                                                                                                                                       | probably high risk of bias                                                                                                                                                                   | low risk of bias                                                                                                                         | low risk of bias                                                                                                                         | low risk of bias                                                                                                                                                             |
| curcumin, piperine                     | probiotics                            | 48609                                                                                        | Pawar                                                                               | probably low risk of bias                                                                                                                                                        | low risk of bias                                                                                                                                                                             | low risk of bias                                                                                                                         | low risk of bias                                                                                                                         | probably low risk of bias                                                                                                                                                    |
| doxycycline                            | standard care/placebo                 | 55459, Butler_doxycly                                                                        | Butler                                                                              | low risk of bias                                                                                                                                                                 | probably high risk of bias                                                                                                                                                                   | low risk of bias                                                                                                                         | low risk of bias                                                                                                                         | low risk of bias                                                                                                                                                             |
| doxycycline, ivermectin                | ivermectin                            | Ahmed                                                                                        | Ahmed                                                                               | probably low risk of bias                                                                                                                                                        | low risk of bias                                                                                                                                                                             | low risk of bias                                                                                                                         | low risk of bias                                                                                                                         | probably low risk of bias                                                                                                                                                    |
| doxycycline, ivermectin                | standard care/placebo                 | Ahmed                                                                                        | Ahmed                                                                               | probably low risk of bias                                                                                                                                                        | low risk of bias                                                                                                                                                                             | low risk of bias                                                                                                                         | low risk of bias                                                                                                                         | probably low risk of bias                                                                                                                                                    |
| emtricitabine, tenofovir               | standard care/placebo                 | Gaitan-Duarte                                                                                | Gaitan-Duarte                                                                       | low risk of bias                                                                                                                                                                 | probably high risk of bias                                                                                                                                                                   | low risk of bias                                                                                                                         | low risk of bias                                                                                                                         | low risk of bias                                                                                                                                                             |
| favipiravir                            | lopinavir-ritonavir                   | 35903                                                                                        | Solaymani-Dodaran                                                                   | low risk of bias                                                                                                                                                                 | probably high risk of bias                                                                                                                                                                   | low risk of bias                                                                                                                         | low risk of bias                                                                                                                         | probably low risk of bias                                                                                                                                                    |
| favipiravir                            | standard care/placebo                 | 2637, Lou, Lou (1<br>10147, 10287, 997<br>32588<br>24988, Udwadia<br>32586<br>60646<br>27460 | Lou<br>Ivashchenko<br>Ruzhentsova<br>Udwadia<br>Balykova_2<br>Shinkai<br>Balykova_1 | low risk of bias<br>probably high risk of bias<br>probably high risk of bias<br>probably high risk of bias<br>low risk of bias<br>low risk of bias<br>probably high risk of bias | probably high risk of bias<br>high risk of bias<br>probably high risk of bias<br>probably high risk of bias<br>probably high risk of bias<br>probably high risk of bias<br>high risk of bias | low risk of bias<br>low risk of bias | low risk of bias<br>low risk of bias | low risk of bias<br>low risk of bias<br>probably low risk of bias<br>probably low risk of bias<br>low risk of bias<br>probably low risk of bias<br>probably low risk of bias |
| favipiravir, hydrochloroquine          | standard care/placebo                 | Bosaeed                                                                                      | Bosaeed                                                                             | low risk of bias                                                                                                                                                                 | probably high risk of bias                                                                                                                                                                   | low risk of bias                                                                                                                         | low risk of bias                                                                                                                         | low risk of bias                                                                                                                                                             |
| flvoxamine                             | standard care/placebo                 | 18818<br>70784, Reis_2                                                                       | Lenze<br>Reis_2                                                                     | low risk of bias<br>low risk of bias                                                                                                                                             | low risk of bias<br>low risk of bias                                                                                                                                                         | high risk of bias<br>low risk of bias                                                                                                    | low risk of bias<br>low risk of bias                                                                                                     | low risk of bias<br>probably low risk of bias                                                                                                                                |
| full-dose anticoagulant                | intermediate-dose anticoagulation     | Spyropoulos                                                                                  | Spyropoulos                                                                         | probably low risk of bias                                                                                                                                                        | low risk of bias                                                                                                                                                                             | low risk of bias                                                                                                                         | low risk of bias                                                                                                                         | low risk of bias                                                                                                                                                             |
| full-dose anticoagulation              | intermediate-dose anticoagulation     | 65782                                                                                        | Oliynyk                                                                             | probably high risk of bias                                                                                                                                                       | probably high risk of bias                                                                                                                                                                   | low risk of bias                                                                                                                         | low risk of bias                                                                                                                         | probably low risk of bias                                                                                                                                                    |
| full-dose anticoagulation              | standard care/placebo                 | 47030<br>Sholzberg<br>64008                                                                  | Lopes_3<br>Sholzberg<br>Ananworanich                                                | low risk of bias<br>low risk of bias<br>probably low risk of bias                                                                                                                | probably high risk of bias<br>probably high risk of bias<br>low risk of bias                                                                                                                 | low risk of bias<br>low risk of bias<br>low risk of bias                                                                                 | low risk of bias<br>low risk of bias<br>low risk of bias                                                                                 | low risk of bias<br>probably low risk of bias<br>low risk of bias                                                                                                            |
| hydroxychloroquine                     | droxychloroquine, lopinavir-ritonavir | 52697                                                                                        | Arabi                                                                               | low risk of bias                                                                                                                                                                 | probably high risk of bias                                                                                                                                                                   | low risk of bias                                                                                                                         | low risk of bias                                                                                                                         | probably low risk of bias                                                                                                                                                    |
| hydroxychloroquine                     | hydroxychloroquine, zinc              | 21407                                                                                        | Abd-El Salam                                                                        | probably high risk of bias                                                                                                                                                       | probably high risk of bias                                                                                                                                                                   | low risk of bias                                                                                                                         | low risk of bias                                                                                                                         | probably low risk of bias                                                                                                                                                    |
| hydroxychloroquine                     | interferon beta, lopinavir-ritonavir  | 45662, Ader_1                                                                                | Ader_1                                                                              | low risk of bias                                                                                                                                                                 | probably high risk of bias                                                                                                                                                                   | low risk of bias                                                                                                                         | low risk of bias                                                                                                                         | low risk of bias                                                                                                                                                             |
| hydroxychloroquine                     | ivermectin                            | 34666                                                                                        | Galan                                                                               | low risk of bias                                                                                                                                                                 | low risk of bias                                                                                                                                                                             | low risk of bias                                                                                                                         | low risk of bias                                                                                                                         | probably low risk of bias                                                                                                                                                    |

|                                         |                                      |                                                                                                                                                                             |                                                                                                                                                        |                                                                                                                                                                                                                                                                                                         |                                                                                                                                                                                                                                                                                                                                                  |                                                                                                                                                                                                                                                                  |                                                                                                                                                                                                                                                                  |                                                                                                                                                                                                                                                                         |
|-----------------------------------------|--------------------------------------|-----------------------------------------------------------------------------------------------------------------------------------------------------------------------------|--------------------------------------------------------------------------------------------------------------------------------------------------------|---------------------------------------------------------------------------------------------------------------------------------------------------------------------------------------------------------------------------------------------------------------------------------------------------------|--------------------------------------------------------------------------------------------------------------------------------------------------------------------------------------------------------------------------------------------------------------------------------------------------------------------------------------------------|------------------------------------------------------------------------------------------------------------------------------------------------------------------------------------------------------------------------------------------------------------------|------------------------------------------------------------------------------------------------------------------------------------------------------------------------------------------------------------------------------------------------------------------|-------------------------------------------------------------------------------------------------------------------------------------------------------------------------------------------------------------------------------------------------------------------------|
| hydroxychloroquine                      | lopinavir-ritonavir                  | 45662, Ader_1<br>52697                                                                                                                                                      | Ader_1<br>Arabi                                                                                                                                        | low risk of bias<br>low risk of bias                                                                                                                                                                                                                                                                    | probably high risk of bias<br>probably high risk of bias                                                                                                                                                                                                                                                                                         | low risk of bias<br>low risk of bias                                                                                                                                                                                                                             | low risk of bias<br>low risk of bias                                                                                                                                                                                                                             | low risk of bias<br>probably low risk of bias                                                                                                                                                                                                                           |
| hydroxychloroquine                      | standard care/placebo                | 14989, 8444, xx<br>22152, 9166<br>11299<br>13936<br>15632, Pan_hydroxychloroquine<br>16085, 38308<br>16281<br>18245, 23358<br>45662, Ader_1<br>41434<br>Schwartz_2<br>52697 | Horby_2<br>Cavalcanti<br>Abd-Elislam_1<br>Ulrich<br>Pan_hydroxychloroquine<br>Dubée<br>Lyngbakken<br>Self<br>Ader_1<br>Réa-Neto<br>Schwartz_2<br>Arabi | low risk of bias<br>low risk of bias<br>probably high risk of bias<br>probably low risk of bias<br>low risk of bias<br>low risk of bias<br>probably high risk of bias<br>low risk of bias<br>probably high risk of bias | probably high risk of bias<br>probably high risk of bias<br>probably high risk of bias<br>low risk of bias<br>probably high risk of bias<br>probably high risk of bias<br>low risk of bias<br>probably high risk of bias<br>probably high risk of bias<br>low risk of bias<br>low risk of bias<br>low risk of bias<br>probably high risk of bias | low risk of bias<br>low risk of bias | low risk of bias<br>low risk of bias | low risk of bias<br>low risk of bias<br>probably low risk of bias<br>low risk of bias<br>probably low risk of bias<br>low risk of bias<br>low risk of bias<br>probably low risk of bias |
| hydroxychloroquine, lopinavir-ritonavir | hydroxychloroquine, umifenovir       | 23259, 8                                                                                                                                                                    | Nojomi                                                                                                                                                 | low risk of bias                                                                                                                                                                                                                                                                                        | probably high risk of bias                                                                                                                                                                                                                                                                                                                       | low risk of bias                                                                                                                                                                                                                                                 | low risk of bias                                                                                                                                                                                                                                                 | probably low risk of bias                                                                                                                                                                                                                                               |
| hydroxychloroquine, lopinavir-ritonavir | lopinavir-ritonavir                  | 52697                                                                                                                                                                       | Arabi                                                                                                                                                  | low risk of bias                                                                                                                                                                                                                                                                                        | probably high risk of bias                                                                                                                                                                                                                                                                                                                       | low risk of bias                                                                                                                                                                                                                                                 | low risk of bias                                                                                                                                                                                                                                                 | probably low risk of bias                                                                                                                                                                                                                                               |
| hydroxychloroquine, lopinavir-ritonavir | standard care/placebo                | 52697                                                                                                                                                                       | Arabi                                                                                                                                                  | low risk of bias                                                                                                                                                                                                                                                                                        | probably high risk of bias                                                                                                                                                                                                                                                                                                                       | low risk of bias                                                                                                                                                                                                                                                 | low risk of bias                                                                                                                                                                                                                                                 | probably low risk of bias                                                                                                                                                                                                                                               |
| hydroxychloroquine, rivabirin           | lopinavir-ritonavir, ribavirin       | 46308_severe                                                                                                                                                                | Singh_3                                                                                                                                                | probably high risk of bias                                                                                                                                                                                                                                                                              | probably high risk of bias                                                                                                                                                                                                                                                                                                                       | low risk of bias                                                                                                                                                                                                                                                 | low risk of bias                                                                                                                                                                                                                                                 | probably high risk of bias                                                                                                                                                                                                                                              |
| hydroxychloroquine, rivabirin           | standard care/placebo                | 46308_non severe<br>46308_severe                                                                                                                                            | Singh_2<br>Singh_3                                                                                                                                     | probably high risk of bias<br>probably high risk of bias                                                                                                                                                                                                                                                | probably high risk of bias<br>probably high risk of bias                                                                                                                                                                                                                                                                                         | low risk of bias<br>low risk of bias                                                                                                                                                                                                                             | low risk of bias<br>low risk of bias                                                                                                                                                                                                                             | probably high risk of bias<br>probably high risk of bias                                                                                                                                                                                                                |
| inhaled corticosteroids                 | standard care/placebo                | 57300, Yu                                                                                                                                                                   | Yu                                                                                                                                                     | probably low risk of bias                                                                                                                                                                                                                                                                               | probably high risk of bias                                                                                                                                                                                                                                                                                                                       | low risk of bias                                                                                                                                                                                                                                                 | low risk of bias                                                                                                                                                                                                                                                 | probably high risk of bias                                                                                                                                                                                                                                              |
| inhaled pan-JAK inhibitor               | standard care/placebo                | 34842                                                                                                                                                                       | Singh_1                                                                                                                                                | probably low risk of bias                                                                                                                                                                                                                                                                               | low risk of bias                                                                                                                                                                                                                                                                                                                                 | low risk of bias                                                                                                                                                                                                                                                 | low risk of bias                                                                                                                                                                                                                                                 | low risk of bias                                                                                                                                                                                                                                                        |
| interferon alpha                        | combinant super combinant interferon | 32737, 7, 9574                                                                                                                                                              | Li_2                                                                                                                                                   | probably high risk of bias                                                                                                                                                                                                                                                                              | probably high risk of bias                                                                                                                                                                                                                                                                                                                       | low risk of bias                                                                                                                                                                                                                                                 | low risk of bias                                                                                                                                                                                                                                                 | low risk of bias                                                                                                                                                                                                                                                        |
| interferon alpha                        | standard care/placebo                | 35022<br>59366, 60209                                                                                                                                                       | Pandit<br>Bhushan                                                                                                                                      | probably high risk of bias<br>probably high risk of bias                                                                                                                                                                                                                                                | probably high risk of bias<br>probably high risk of bias                                                                                                                                                                                                                                                                                         | low risk of bias<br>low risk of bias                                                                                                                                                                                                                             | low risk of bias<br>low risk of bias                                                                                                                                                                                                                             | probably low risk of bias<br>probably high risk of bias                                                                                                                                                                                                                 |
| interferon beta                         | standard care/placebo                | 11541, 11937<br>15632, Pan_interferon<br>39381, Darazam_2<br>Kalil_2<br>11243, 5514, 824                                                                                    | Rahmani<br>Pan_interferon<br>Darazam_2<br>Kalil_2<br>Davoudi-Monfared                                                                                  | probably high risk of bias<br>low risk of bias<br>low risk of bias<br>low risk of bias<br>low risk of bias                                                                                                                                                                                              | probably high risk of bias<br>probably high risk of bias<br>probably high risk of bias<br>low risk of bias<br>high risk of bias                                                                                                                                                                                                                  | high risk of bias<br>low risk of bias<br>low risk of bias<br>low risk of bias<br>probably high risk of bias                                                                                                                                                      | low risk of bias<br>low risk of bias<br>low risk of bias<br>low risk of bias<br>low risk of bias                                                                                                                                                                 | probably low risk of bias<br>low risk of bias<br>low risk of bias<br>low risk of bias<br>probably low risk of bias                                                                                                                                                      |
| interferon beta, lopinavir-ritonavir    | lopinavir-ritonavir                  | 45662, Ader_1                                                                                                                                                               | Ader_1                                                                                                                                                 | low risk of bias                                                                                                                                                                                                                                                                                        | probably high risk of bias                                                                                                                                                                                                                                                                                                                       | low risk of bias                                                                                                                                                                                                                                                 | low risk of bias                                                                                                                                                                                                                                                 | low risk of bias                                                                                                                                                                                                                                                        |
| interferon beta, lopinavir-ritonavir    | sofosbuvir                           | Mostafa                                                                                                                                                                     | Alavi-Moghaddam                                                                                                                                        | probably high risk of bias                                                                                                                                                                                                                                                                              | probably high risk of bias                                                                                                                                                                                                                                                                                                                       | low risk of bias                                                                                                                                                                                                                                                 | low risk of bias                                                                                                                                                                                                                                                 | probably low risk of bias                                                                                                                                                                                                                                               |
| interferon beta, lopinavir-ritonavir    | standard care/placebo                | 45662, Ader_1                                                                                                                                                               | Ader_1                                                                                                                                                 | low risk of bias                                                                                                                                                                                                                                                                                        | probably high risk of bias                                                                                                                                                                                                                                                                                                                       | low risk of bias                                                                                                                                                                                                                                                 | low risk of bias                                                                                                                                                                                                                                                 | low risk of bias                                                                                                                                                                                                                                                        |
| interferon beta, ribavirin              | standard care/placebo                | 2942                                                                                                                                                                        | Hung                                                                                                                                                   | probably high risk of bias                                                                                                                                                                                                                                                                              | probably high risk of bias                                                                                                                                                                                                                                                                                                                       | low risk of bias                                                                                                                                                                                                                                                 | low risk of bias                                                                                                                                                                                                                                                 | probably low risk of bias                                                                                                                                                                                                                                               |

|                                |                       |                                                                                                                       |                                                                                                         |                                                                                                                                                                                          |                                                                                                                                                                                            |                                                                                                                                                              |                                                                                                                                                                                         |                                                                                                           |
|--------------------------------|-----------------------|-----------------------------------------------------------------------------------------------------------------------|---------------------------------------------------------------------------------------------------------|------------------------------------------------------------------------------------------------------------------------------------------------------------------------------------------|--------------------------------------------------------------------------------------------------------------------------------------------------------------------------------------------|--------------------------------------------------------------------------------------------------------------------------------------------------------------|-----------------------------------------------------------------------------------------------------------------------------------------------------------------------------------------|-----------------------------------------------------------------------------------------------------------|
| itolizumab                     | standard care/placebo | 21347, Kumar                                                                                                          | Kumar_1                                                                                                 | probably high risk of bias                                                                                                                                                               | probably high risk of bias                                                                                                                                                                 | low risk of bias                                                                                                                                             | low risk of bias                                                                                                                                                                        | low risk of bias                                                                                          |
| itraconazole                   | standard care/placebo | 36093, Liesenborgl                                                                                                    | Liesenborghs                                                                                            | probably high risk of bias                                                                                                                                                               | probably high risk of bias                                                                                                                                                                 | low risk of bias                                                                                                                                             | low risk of bias                                                                                                                                                                        | low risk of bias                                                                                          |
| ivermectin                     | standard care/placebo | 49440, Krolewieck<br>Ahmed<br>53436, Ravikirti<br>Mohan<br>34416, 41159, Lop<br>47181, Abd-El salam<br>35667<br>51938 | Krolewiecki<br>Ahmed<br>Ravikirti<br>Mohan<br>Lopez-Medina<br>Abd-El salam_3<br>Pott-Junior<br>Vallejos | low risk of bias<br>probably low risk of bias<br>low risk of bias<br>low risk of bias<br>low risk of bias<br>probably high risk of bias<br>low risk of bias<br>probably low risk of bias | probably high risk of bias<br>low risk of bias<br>low risk of bias<br>low risk of bias<br>low risk of bias<br>probably high risk of bias<br>probably high risk of bias<br>low risk of bias | low risk of bias<br>low risk of bias | low risk of bias<br>probably low risk of bias<br>low risk of bias<br>probably low risk of bias<br>low risk of bias<br>low risk of bias<br>probably low risk of bias<br>low risk of bias |                                                                                                           |
| leronlimab                     | standard care/placebo | 36109                                                                                                                 | Skendelas                                                                                               | probably low risk of bias                                                                                                                                                                | low risk of bias                                                                                                                                                                           | low risk of bias                                                                                                                                             | low risk of bias                                                                                                                                                                        | low risk of bias                                                                                          |
| lopinavir-ritonavir            | standard care/placebo | 330<br>14781, 14883<br>15632, Pan_lopinavir-rit<br>45662, Ader_1<br>52697                                             | Cao_1<br>Horby_3<br>Pan_lopinavir-ritonavir<br>Ader_1<br>Arabi                                          | low risk of bias<br>low risk of bias<br>low risk of bias<br>low risk of bias<br>low risk of bias                                                                                         | probably high risk of bias<br>probably high risk of bias<br>probably high risk of bias<br>probably high risk of bias<br>probably high risk of bias                                         | low risk of bias<br>low risk of bias<br>low risk of bias<br>low risk of bias<br>low risk of bias                                                             | low risk of bias<br>low risk of bias<br>low risk of bias<br>low risk of bias<br>low risk of bias                                                                                        | low risk of bias<br>low risk of bias<br>low risk of bias<br>low risk of bias<br>probably low risk of bias |
| lopinavir-ritonavir, ribavirin | standard care/placebo | 46308_severe                                                                                                          | Singh_3                                                                                                 | probably high risk of bias                                                                                                                                                               | probably high risk of bias                                                                                                                                                                 | low risk of bias                                                                                                                                             | low risk of bias                                                                                                                                                                        | probably high risk of bias                                                                                |
| mavrilimumab                   | standard care/placebo | 36763                                                                                                                 | Cremer_2                                                                                                | low risk of bias                                                                                                                                                                         | low risk of bias                                                                                                                                                                           | low risk of bias                                                                                                                                             | low risk of bias                                                                                                                                                                        | low risk of bias                                                                                          |
| metisoprinol                   | standard care/placebo | Migled                                                                                                                | Migled                                                                                                  | probably high risk of bias                                                                                                                                                               | probably high risk of bias                                                                                                                                                                 | low risk of bias                                                                                                                                             | low risk of bias                                                                                                                                                                        | probably low risk of bias                                                                                 |
| molnupiravir                   | standard care/placebo | CR216-21                                                                                                              | Vyas                                                                                                    | low risk of bias                                                                                                                                                                         | probably high risk of bias                                                                                                                                                                 | low risk of bias                                                                                                                                             | low risk of bias                                                                                                                                                                        | low risk of bias                                                                                          |
| nitazoxanide                   | standard care/placebo | 50790, Blum                                                                                                           | Blum                                                                                                    | low risk of bias                                                                                                                                                                         | low risk of bias                                                                                                                                                                           | low risk of bias                                                                                                                                             | low risk of bias                                                                                                                                                                        | low risk of bias                                                                                          |
| nitric oxide                   | standard care/placebo | Moni                                                                                                                  | Moni                                                                                                    | low risk of bias                                                                                                                                                                         | probably high risk of bias                                                                                                                                                                 | probably low risk of bias                                                                                                                                    | low risk of bias                                                                                                                                                                        | probably low risk of bias                                                                                 |
| opaganib                       | standard care/placebo | Winthrop                                                                                                              | Winthrop                                                                                                | low risk of bias                                                                                                                                                                         | low risk of bias                                                                                                                                                                           | low risk of bias                                                                                                                                             | low risk of bias                                                                                                                                                                        | low risk of bias                                                                                          |
| pentoxifylline                 | standard care/placebo | 21098<br>67125                                                                                                        | Malonado<br>Azizi                                                                                       | probably high risk of bias<br>probably low risk of bias                                                                                                                                  | probably high risk of bias<br>low risk of bias                                                                                                                                             | high risk of bias<br>high risk of bias                                                                                                                       | low risk of bias<br>low risk of bias                                                                                                                                                    | probably low risk of bias<br>probably low risk of bias                                                    |
| polymerized type I collagen    | standard care/placebo | Méndez-Flores                                                                                                         | Méndez-Flores                                                                                           | probably low risk of bias                                                                                                                                                                | low risk of bias                                                                                                                                                                           | low risk of bias                                                                                                                                             | low risk of bias                                                                                                                                                                        | probably low risk of bias                                                                                 |
| probiotics                     | standard care/placebo | 68436                                                                                                                 | Ivashkin                                                                                                | probably high risk of bias                                                                                                                                                               | probably high risk of bias                                                                                                                                                                 | low risk of bias                                                                                                                                             | low risk of bias                                                                                                                                                                        | low risk of bias                                                                                          |
| progesterone                   | standard care/placebo | 32075, Ghandeha                                                                                                       | Ghandehari                                                                                              | probably high risk of bias                                                                                                                                                               | probably high risk of bias                                                                                                                                                                 | low risk of bias                                                                                                                                             | low risk of bias                                                                                                                                                                        | low risk of bias                                                                                          |
| proxalutamide                  | standard care/placebo | Cadegiani (proxalutun<br>48943<br>Cadegiani (female col                                                               | Cadegiani_2<br>Cadegiani_5<br>Cadegiani_4                                                               | probably low risk of bias<br>high risk of bias<br>high risk of bias                                                                                                                      | low risk of bias<br>probably high risk of bias<br>low risk of bias                                                                                                                         | low risk of bias<br>low risk of bias<br>low risk of bias                                                                                                     | low risk of bias<br>low risk of bias<br>low risk of bias                                                                                                                                | probably low risk of bias<br>probably low risk of bias<br>probably low risk of bias                       |
|                                |                       |                                                                                                                       |                                                                                                         | Terminated early for benefit                                                                                                                                                             |                                                                                                                                                                                            |                                                                                                                                                              |                                                                                                                                                                                         |                                                                                                           |

|                                             |                             |                                                                                              |                                                                                    |                                                                                                                                           |                                                                                                                                                                                   |                                                                                                                                                   |                                                                                                                                          |                                                                                                                                                                     |
|---------------------------------------------|-----------------------------|----------------------------------------------------------------------------------------------|------------------------------------------------------------------------------------|-------------------------------------------------------------------------------------------------------------------------------------------|-----------------------------------------------------------------------------------------------------------------------------------------------------------------------------------|---------------------------------------------------------------------------------------------------------------------------------------------------|------------------------------------------------------------------------------------------------------------------------------------------|---------------------------------------------------------------------------------------------------------------------------------------------------------------------|
| pyridostigmine                              | standard care/placebo       | Fragoso-Saavedre                                                                             | Fragoso-Saavedra                                                                   | probably low risk of bias                                                                                                                 | low risk of bias                                                                                                                                                                  | low risk of bias                                                                                                                                  | low risk of bias                                                                                                                         | low risk of bias                                                                                                                                                    |
| quercetin                                   | standard care/placebo       | 49941                                                                                        | Di Pierro_1                                                                        | probably high risk of bias                                                                                                                | probably high risk of bias                                                                                                                                                        | low risk of bias                                                                                                                                  | low risk of bias                                                                                                                         | probably low risk of bias                                                                                                                                           |
| ravidasvir, sofosbuvir                      | standard care/placebo       | 57630                                                                                        | Abbass                                                                             | low risk of bias                                                                                                                          | probably high risk of bias                                                                                                                                                        | low risk of bias                                                                                                                                  | low risk of bias                                                                                                                         | probably low risk of bias                                                                                                                                           |
| human granulocyte colony-stimulating factor | standard care/placebo       | 12705                                                                                        | Cheng                                                                              | low risk of bias                                                                                                                          | probably high risk of bias                                                                                                                                                        | low risk of bias                                                                                                                                  | low risk of bias                                                                                                                         | probably low risk of bias                                                                                                                                           |
| remdesivir                                  | standard care/placebo       | 2408<br>11347<br>15633, 3821<br>15632, Pan_remdesivir<br>37778<br>Ader (remdesivir)<br>68059 | Wang_1<br>Spinner<br>Beigel<br>Pan_remdesivir<br>Mahajan<br>Ader_2<br>Abd-Elalam_4 | low risk of bias<br>low risk of bias<br>low risk of bias<br>low risk of bias<br>high risk of bias<br>low risk of bias<br>low risk of bias | low risk of bias<br>high risk of bias<br>low risk of bias<br>probably high risk of bias<br>probably high risk of bias<br>probably high risk of bias<br>probably high risk of bias | low risk of bias<br>probably low risk of bias<br>low risk of bias | low risk of bias<br>low risk of bias | probably low risk of bias<br>low risk of bias<br>low risk of bias<br>low risk of bias<br>probably low risk of bias<br>low risk of bias<br>probably low risk of bias |
| resveratrol                                 | standard care/placebo       | 65305                                                                                        | McCreary                                                                           | low risk of bias                                                                                                                          | low risk of bias                                                                                                                                                                  | low risk of bias                                                                                                                                  | low risk of bias                                                                                                                         | low risk of bias                                                                                                                                                    |
| ribavirin, sofosbuvir-daclatasvir           | standard care/placebo       | 11010                                                                                        | Kasgari                                                                            | low risk of bias                                                                                                                          | probably high risk of bias                                                                                                                                                        | low risk of bias                                                                                                                                  | low risk of bias                                                                                                                         | probably low risk of bias                                                                                                                                           |
| secukinumab                                 | standard care/placebo       | Resende                                                                                      | Resende                                                                            | probably high risk of bias                                                                                                                | probably high risk of bias                                                                                                                                                        | low risk of bias                                                                                                                                  | low risk of bias                                                                                                                         | probably low risk of bias                                                                                                                                           |
| serine protease inhibitors                  | standard care/placebo       | 40853                                                                                        | Gunst                                                                              | low risk of bias                                                                                                                          | low risk of bias                                                                                                                                                                  | low risk of bias                                                                                                                                  | low risk of bias                                                                                                                         | low risk of bias                                                                                                                                                    |
| sildenafil                                  | standard care/placebo       | Santamarina                                                                                  | Santamarina                                                                        | low risk of bias                                                                                                                          | low risk of bias                                                                                                                                                                  | probably low risk of bias                                                                                                                         | low risk of bias                                                                                                                         | probably low risk of bias                                                                                                                                           |
| sitagliptin                                 | sitagliptin, spironolactone | Abbasi                                                                                       | Abbasi                                                                             | probably high risk of bias                                                                                                                | probably high risk of bias                                                                                                                                                        | low risk of bias                                                                                                                                  | low risk of bias                                                                                                                         | probably low risk of bias                                                                                                                                           |
| sitagliptin                                 | spironolactone              | Abbasi                                                                                       | Abbasi                                                                             | probably high risk of bias                                                                                                                | probably high risk of bias                                                                                                                                                        | low risk of bias                                                                                                                                  | low risk of bias                                                                                                                         | probably low risk of bias                                                                                                                                           |
| sitagliptin                                 | standard care/placebo       | Abbasi                                                                                       | Abbasi                                                                             | probably high risk of bias                                                                                                                | probably high risk of bias                                                                                                                                                        | low risk of bias                                                                                                                                  | low risk of bias                                                                                                                         | probably low risk of bias                                                                                                                                           |
| sitagliptin, spironolactone                 | spironolactone              | Abbasi                                                                                       | Abbasi                                                                             | probably high risk of bias                                                                                                                | probably high risk of bias                                                                                                                                                        | low risk of bias                                                                                                                                  | low risk of bias                                                                                                                         | probably low risk of bias                                                                                                                                           |
| sitagliptin, spironolactone                 | standard care/placebo       | Abbasi                                                                                       | Abbasi                                                                             | probably high risk of bias                                                                                                                | probably high risk of bias                                                                                                                                                        | low risk of bias                                                                                                                                  | low risk of bias                                                                                                                         | probably low risk of bias                                                                                                                                           |
| spironolactone                              | standard care/placebo       | Abbasi                                                                                       | Abbasi                                                                             | probably high risk of bias                                                                                                                | probably high risk of bias                                                                                                                                                        | low risk of bias                                                                                                                                  | low risk of bias                                                                                                                         | probably low risk of bias                                                                                                                                           |
| statins                                     | standard care/placebo       | Ghati<br>64621                                                                               | Ghati<br>Davoodi_2                                                                 | probably high risk of bias<br>low risk of bias                                                                                            | probably high risk of bias<br>low risk of bias                                                                                                                                    | low risk of bias<br>low risk of bias                                                                                                              | low risk of bias<br>low risk of bias                                                                                                     | probably low risk of bias<br>probably low risk of bias                                                                                                              |
| sulodexide                                  | standard care/placebo       | 21816, 34575                                                                                 | Gonzalez-Ochoa                                                                     | probably low risk of bias                                                                                                                 | low risk of bias                                                                                                                                                                  | low risk of bias                                                                                                                                  | low risk of bias                                                                                                                         | low risk of bias                                                                                                                                                    |
| thalidomide                                 | standard care/placebo       | Amra                                                                                         | Amra                                                                               | probably high risk of bias                                                                                                                | probably high risk of bias                                                                                                                                                        | probably high risk of bias                                                                                                                        | low risk of bias                                                                                                                         | low risk of bias                                                                                                                                                    |
| tyrosine kinase inhibitors                  | standard care/placebo       | 49287                                                                                        | Aman                                                                               | low risk of bias                                                                                                                          | low risk of bias                                                                                                                                                                  | low risk of bias                                                                                                                                  | low risk of bias                                                                                                                         | high risk of bias                                                                                                                                                   |

|            |                       |                                             |                   |                            |                            |                  |                  |                           |
|------------|-----------------------|---------------------------------------------|-------------------|----------------------------|----------------------------|------------------|------------------|---------------------------|
|            |                       | 60872                                       | Strich            | probably low risk of bias  | low risk of bias           | low risk of bias | low risk of bias | low risk of bias          |
| umifenovir | standard care/placebo |                                             |                   |                            |                            |                  |                  |                           |
|            |                       | 52841                                       | Darazam_3         | low risk of bias           | probably high risk of bias | low risk of bias | low risk of bias | probably low risk of bias |
| vitamin C  | standard care/placebo |                                             |                   |                            |                            |                  |                  |                           |
|            |                       | 26123, Zhang<br>25793                       | Zhang_1<br>Kumari | low risk of bias           | low risk of bias           | low risk of bias | low risk of bias | probably low risk of bias |
|            |                       | 31401, JamaliMoghadamJamaliMoghadamSiahkali |                   | probably high risk of bias | probably high risk of bias | low risk of bias | low risk of bias | probably low risk of bias |
|            |                       |                                             |                   | probably high risk of bias | probably high risk of bias | low risk of bias | low risk of bias | probably low risk of bias |
| vitamin D  | standard care/placebo |                                             |                   |                            |                            |                  |                  |                           |
|            |                       | 18947, 31936                                | Murai             | probably low risk of bias  | low risk of bias           | low risk of bias | low risk of bias | probably low risk of bias |
| zinc       | standard care/placebo |                                             |                   |                            |                            |                  |                  |                           |
|            |                       | 34745                                       | Patel_1           | probably low risk of bias  | low risk of bias           | low risk of bias | low risk of bias | low risk of bias          |

| Hospital Admission               |                           |                                      |                                                  |                                                                   |                                                                              |                                                           |                                                          |                                                                                     |       |
|----------------------------------|---------------------------|--------------------------------------|--------------------------------------------------|-------------------------------------------------------------------|------------------------------------------------------------------------------|-----------------------------------------------------------|----------------------------------------------------------|-------------------------------------------------------------------------------------|-------|
| Treatment 1                      | Treatment 2               | Trial                                | First author                                     | Randomization                                                     | Deviations from the intended                                                 | Missing outcome data                                      | Measurement of outcome                                   | Selection of the reported                                                           | Other |
| 5-alpha reductase inhibitor      | standard care/placebo     | 19047, 33978, Cadegiani, Cadegiani_1 | Cadegiani_1                                      | probably low risk of bias                                         | low risk of bias                                                             | high risk of bias                                         | low risk of bias                                         | low risk of bias                                                                    |       |
| ACEi/ARB                         | standard care/placebo     | 49084, Puskarić                      | Puskarić                                         | low risk of bias                                                  | low risk of bias                                                             | low risk of bias                                          | low risk of bias                                         | low risk of bias                                                                    |       |
| nirmatrelvir/ritonavir           | standard care/placebo     | EPIC-HR                              | EPIC-HR                                          | probably low risk of bias                                         | low risk of bias                                                             | low risk of bias                                          | low risk of bias                                         | low risk of bias                                                                    |       |
| antihepatic viral                | standard care/placebo     | 24460                                | Roosbeh                                          | low risk of bias                                                  | low risk of bias                                                             | low risk of bias                                          | low risk of bias                                         | low risk of bias                                                                    |       |
| artemisinin                      | standard care/placebo     |                                      | Trieu                                            | probably high risk of bias                                        | probably high risk of bias                                                   | low risk of bias                                          | low risk of bias                                         | probably low risk of bias                                                           |       |
| aspirin                          | full-dose anticoagulation | 67646                                | Connors                                          | low risk of bias                                                  | low risk of bias                                                             | low risk of bias                                          | low risk of bias                                         | low risk of bias                                                                    |       |
| aspirin                          | standard care/placebo     | 67646                                | Connors                                          | low risk of bias                                                  | low risk of bias                                                             | low risk of bias                                          | low risk of bias                                         | low risk of bias                                                                    |       |
| azithromycin                     | standard care/placebo     | 34434, 40804, Oldenburg              | IPLE Trial Collaborative Group, Hinks, Oldenburg | low risk of bias<br>low risk of bias<br>low risk of bias          | probably high risk of bias<br>probably high risk of bias<br>low risk of bias | low risk of bias<br>low risk of bias<br>high risk of bias | low risk of bias<br>low risk of bias<br>low risk of bias | low risk of bias<br>low risk of bias<br>low risk of bias                            |       |
| azithromycin, hydroxychloroquine | doxycycline               | Sobngwi                              | Sobngwi                                          | low risk of bias                                                  | probably high risk of bias                                                   | low risk of bias                                          | low risk of bias                                         | low risk of bias                                                                    |       |
| azithromycin, hydroxychloroquine | hydroxychloroquine        | 20005, 33489, Johnston               | Omrani, Johnston                                 | low risk of bias<br>probably low risk of bias                     | low risk of bias                                                             | low risk of bias                                          | low risk of bias                                         | probably low risk of bias<br>probably low risk of bias                              |       |
| azithromycin, hydroxychloroquine | standard care/placebo     | 20005, 33489, Johnston, 60017        | Omrani, Johnston, Rodrigues                      | low risk of bias<br>probably low risk of bias<br>low risk of bias | low risk of bias                                                             | low risk of bias                                          | low risk of bias                                         | probably low risk of bias<br>probably low risk of bias<br>probably low risk of bias |       |
| cannabidiol                      | standard care/placebo     | 66954                                | Crippa                                           | probably low risk of bias                                         | low risk of bias                                                             | low risk of bias                                          | low risk of bias                                         | low risk of bias                                                                    |       |
| colchicine                       | standard care/placebo     | 28222, 45870                         | Tardif                                           | probably low risk of bias                                         | low risk of bias                                                             | low risk of bias                                          | low risk of bias                                         | low risk of bias                                                                    |       |
| electrolyzed saline              | standard care/placebo     | 13074, 53789                         | Delgado-Enciso                                   | probably high risk of bias                                        | probably high risk of bias                                                   | low risk of bias                                          | low risk of bias                                         | low risk of bias                                                                    |       |
| emtricitabine, tenofovir         | standard care/placebo     | 50792, Arruda                        | Parietti, Arruda                                 | low risk of bias<br>probably high risk of bias                    | probably high risk of bias                                                   | low risk of bias                                          | low risk of bias                                         | probably low risk of bias<br>low risk of bias                                       |       |
| emtricitabine, tenofovir         | tenofovir                 | Arruda                               | Arruda                                           | probably high risk of bias                                        | probably high risk of bias                                                   | low risk of bias                                          | low risk of bias                                         | low risk of bias                                                                    |       |
| favipiravir                      | standard care/placebo     | 32588                                | Ruzhentsova                                      | probably high risk of bias                                        | probably high risk of bias                                                   | low risk of bias                                          | low risk of bias                                         | probably low risk of bias                                                           |       |
| febuxostat                       | hydroxychloroquine        | 7586, Davoodi                        | Davoodi                                          | probably high risk of bias                                        | probably high risk of bias                                                   | probably high risk of bias                                | low risk of bias                                         | probably low risk of bias                                                           |       |
| fluvoxamine                      | standard care/placebo     | 18818, 70784, Reis_2, STOP-COVID-2   | Lenze, Reis_2, Reiersen                          | low risk of bias<br>low risk of bias<br>probably low risk of bias | low risk of bias                                                             | high risk of bias                                         | low risk of bias                                         | low risk of bias                                                                    |       |

|                                     |                                         |                               |                      |                            |                            |                            |                  |                           |                              |
|-------------------------------------|-----------------------------------------|-------------------------------|----------------------|----------------------------|----------------------------|----------------------------|------------------|---------------------------|------------------------------|
| full-dose anticoagulation           | standard care/placebo                   | 64008                         | Ananworanich         | probably low risk of bias  | low risk of bias           | low risk of bias           | low risk of bias | low risk of bias          |                              |
|                                     |                                         | 67646                         | Connors              | low risk of bias           | low risk of bias           | low risk of bias           | low risk of bias | low risk of bias          |                              |
| hydroxychloroquine                  | lopinavir-ritonavir                     | Reis_1                        | Reis_1               | low risk of bias           | low risk of bias           | probably high risk of bias | low risk of bias | low risk of bias          |                              |
| hydroxychloroquine                  | standard care/placebo                   | 8565                          | Skipper              | low risk of bias           | low risk of bias           | low risk of bias           | low risk of bias | low risk of bias          |                              |
|                                     |                                         | 20005                         | Omran                | low risk of bias           | low risk of bias           | low risk of bias           | low risk of bias | probably low risk of bias |                              |
|                                     |                                         | Reis_1                        | Reis_1               | low risk of bias           | low risk of bias           | probably high risk of bias | low risk of bias | low risk of bias          |                              |
|                                     |                                         | 33489, Johnston               | Johnston             | probably low risk of bias  | low risk of bias           | low risk of bias           | low risk of bias | probably low risk of bias |                              |
|                                     |                                         | 33028                         | Amaravadi            | low risk of bias           | low risk of bias           | low risk of bias           | low risk of bias | low risk of bias          |                              |
|                                     |                                         | Schwartz_2                    | Schwartz_2           | low risk of bias           | low risk of bias           | low risk of bias           | low risk of bias | low risk of bias          |                              |
| intranasal corticosteroids          | standard care/placebo                   | Clemency                      | Clemency             | low risk of bias           | low risk of bias           | low risk of bias           | low risk of bias | low risk of bias          |                              |
|                                     |                                         | Ezer                          | Ezer                 | low risk of bias           | low risk of bias           | low risk of bias           | low risk of bias | low risk of bias          |                              |
| intranasal hypertonic polymer spray | standard care/placebo                   | 47064                         | Shrivastava          | probably high risk of bias | probably high risk of bias | low risk of bias           | low risk of bias | probably low risk of bias |                              |
| ivermectin                          | standard care/placebo                   | 34416, 41159, Lop             | Lopez-Medina         | low risk of bias           | low risk of bias           | low risk of bias           | low risk of bias | low risk of bias          |                              |
|                                     |                                         | 51938                         | Vallejos             | probably low risk of bias  | low risk of bias           | low risk of bias           | low risk of bias | low risk of bias          |                              |
|                                     |                                         | Buonfrate                     | Buonfrate            | low risk of bias           | low risk of bias           | low risk of bias           | low risk of bias | low risk of bias          |                              |
| levamisole                          | standard care/placebo                   | 37198, Roostaei Firoz         | Roostaei Firozabad   | probably low risk of bias  | low risk of bias           | low risk of bias           | low risk of bias | low risk of bias          |                              |
| lopinavir-ritonavir                 | standard care/placebo                   | Reis_1                        | Reis_1               | low risk of bias           | low risk of bias           | probably high risk of bias | low risk of bias | low risk of bias          |                              |
| metisoprinol                        | standard care/placebo                   | Migled                        | Migled               | probably high risk of bias | probably high risk of bias | low risk of bias           | low risk of bias | probably low risk of bias |                              |
| molnupiravir                        | standard care/placebo                   | 46473, Fischer                | Fischer              | low risk of bias           | low risk of bias           | low risk of bias           | low risk of bias | probably low risk of bias |                              |
|                                     |                                         | MOVE-OUT (MK4482-002          | MOVE-OUT (MK4482-002 | probably low risk of bias  | low risk of bias           | low risk of bias           | low risk of bias | low risk of bias          | Terminated early for benefit |
|                                     |                                         | CR216-21                      | Vyas                 | low risk of bias           | probably high risk of bias | low risk of bias           | low risk of bias | low risk of bias          |                              |
|                                     |                                         | CTRI/2021/06/0339             | Krishnan             | low risk of bias           | probably high risk of bias | probably low risk of bias  | low risk of bias | low risk of bias          |                              |
|                                     |                                         | HCR/III/MOLCOV/04/20          | Kumar_2              | probably high risk of bias | probably high risk of bias | low risk of bias           | low risk of bias | probably low risk of bias |                              |
| mometasone nasal spray              | factory training, standard care/placebo | 48548                         | Kasiri               | probably low risk of bias  | low risk of bias           | low risk of bias           | low risk of bias | probably low risk of bias |                              |
| nanocurcimin                        | standard care/placebo                   | 49064                         | Ahmadi               | low risk of bias           | low risk of bias           | low risk of bias           | low risk of bias | probably low risk of bias |                              |
| nitazoxanide                        | standard care/placebo                   | 16339, 24799                  | Rocco                | low risk of bias           | low risk of bias           | low risk of bias           | low risk of bias | probably low risk of bias |                              |
|                                     |                                         | Rossignol                     | Rossignol            | low risk of bias           | low risk of bias           | low risk of bias           | low risk of bias | probably low risk of bias |                              |
| omega 3                             | standard care/placebo                   | 60421                         | Kosmopoulos          | low risk of bias           | probably high risk of bias | low risk of bias           | low risk of bias | probably low risk of bias |                              |
| peginterferon lambda                | standard care/placebo                   | 18418, 28233                  | Feld                 | low risk of bias           | low risk of bias           | low risk of bias           | low risk of bias | low risk of bias          |                              |
|                                     |                                         | 19514, Jagannathan, Jagannath | Jagannathan          | low risk of bias           | probably low risk of bias  | low risk of bias           | low risk of bias | probably low risk of bias |                              |
| polymerized type I collagen         | standard care/placebo                   | Méndez-Flores                 | Méndez-Flores        | probably low risk of bias  | low risk of bias           | low risk of bias           | low risk of bias | probably low risk of bias |                              |
| povidone-iodine nasal irrigation    | sodium bicarbonate nasal irrigation     | 58027                         | Baxter               | probably low risk of bias  | probably high risk of bias | low risk of bias           | low risk of bias | low risk of bias          |                              |
| probiotics                          | standard care/placebo                   |                               |                      |                            |                            |                            |                  |                           |                              |

|                 |                       |                       |                      |                            |                            |                            |                  |                  |                              |
|-----------------|-----------------------|-----------------------|----------------------|----------------------------|----------------------------|----------------------------|------------------|------------------|------------------------------|
|                 |                       | 44556                 | Gutiérrez-Castrellón | low risk of bias           | low risk of bias           | low risk of bias           | low risk of bias | low risk of bias |                              |
| proxalutamide   | standard care/placebo |                       |                      |                            |                            |                            |                  |                  |                              |
|                 |                       | Cadegiani (proxalutun | Cadegiani_2          | probably low risk of bias  | low risk of bias           | low risk of bias           | low risk of bias | low risk of bias |                              |
|                 |                       | Cadegiani (female col | Cadegiani_4          | high risk of bias          | low risk of bias           | low risk of bias           | low risk of bias | low risk of bias | Terminated early for benefit |
| quercetin       | standard care/placebo |                       |                      |                            |                            |                            |                  |                  |                              |
|                 |                       | 49941                 | Di Pierro_1          | probably high risk of bias | probably high risk of bias | low risk of bias           | low risk of bias | low risk of bias |                              |
|                 |                       | 51397                 | Di Pierro_2          | probably high risk of bias | probably high risk of bias | low risk of bias           | low risk of bias | low risk of bias |                              |
| remdesivir      | standard care/placebo |                       |                      |                            |                            |                            |                  |                  |                              |
|                 |                       | Gottlieb_2, PINETR    | Gottlieb_2           | probably low risk of bias  | low risk of bias           | low risk of bias           | low risk of bias | low risk of bias |                              |
| resveratrol     | standard care/placebo |                       |                      |                            |                            |                            |                  |                  |                              |
|                 |                       | 65305                 | McCreary             | low risk of bias           | low risk of bias           | low risk of bias           | low risk of bias | low risk of bias |                              |
| sulodexide      | standard care/placebo |                       |                      |                            |                            |                            |                  |                  |                              |
|                 |                       | 21816, 34575          | Gonzalez-Ochoa       | probably low risk of bias  | low risk of bias           | low risk of bias           | low risk of bias | low risk of bias |                              |
| tenofovir       | standard care/placebo |                       |                      |                            |                            |                            |                  |                  |                              |
|                 |                       | Arruda                | Arruda               | probably high risk of bias | probably high risk of bias | low risk of bias           | low risk of bias | low risk of bias |                              |
| vitamin C       | standard care/placebo |                       |                      |                            |                            |                            |                  |                  |                              |
|                 |                       | 31458                 | Thomas               | low risk of bias           | probably high risk of bias | probably high risk of bias | low risk of bias | low risk of bias |                              |
| vitamin C       | vitamin C, zinc       |                       |                      |                            |                            |                            |                  |                  |                              |
|                 |                       | 31458                 | Thomas               | low risk of bias           | probably high risk of bias | probably high risk of bias | low risk of bias | low risk of bias |                              |
| vitamin C       | zinc                  |                       |                      |                            |                            |                            |                  |                  |                              |
|                 |                       | 31458                 | Thomas               | low risk of bias           | probably high risk of bias | probably high risk of bias | low risk of bias | low risk of bias |                              |
| vitamin C, zinc | standard care/placebo |                       |                      |                            |                            |                            |                  |                  |                              |
|                 |                       | 31458                 | Thomas               | low risk of bias           | probably high risk of bias | probably high risk of bias | low risk of bias | low risk of bias |                              |
| vitamin C, zinc | zinc                  |                       |                      |                            |                            |                            |                  |                  |                              |
|                 |                       | 31458                 | Thomas               | low risk of bias           | probably high risk of bias | probably high risk of bias | low risk of bias | low risk of bias |                              |
| zinc            | standard care/placebo |                       |                      |                            |                            |                            |                  |                  |                              |
|                 |                       | 31458                 | Thomas               | low risk of bias           | probably high risk of bias | probably high risk of bias | low risk of bias | low risk of bias |                              |

| Adverse Events Leading to Discontinuation |                          |                                      |                            |                            |                              |                      |                        |                           |       |
|-------------------------------------------|--------------------------|--------------------------------------|----------------------------|----------------------------|------------------------------|----------------------|------------------------|---------------------------|-------|
| Treatment 1                               | Treatment 2              | Trial                                | First author               | Randomization              | Deviations from the intended | Missing outcome data | Measurement of outcome | Selection of the reported | Other |
| (acetyl)cysteine                          | standard care/placebo    | 13687                                | de Alencar                 | low risk of bias           | low risk of bias             | low risk of bias     | low risk of bias       | probably low risk of bias |       |
|                                           |                          | 48051                                | Taher                      | probably low risk of bias  | low risk of bias             | low risk of bias     | low risk of bias       | probably low risk of bias |       |
| 5-alpha reductase inhibitor               | standard care/placebo    | 19047, 33978, Cadegiani, Cadegiani_1 | Cadegiani_1                | probably low risk of bias  | low risk of bias             | high risk of bias    | low risk of bias       | probably low risk of bias |       |
|                                           |                          | 35590                                | Zarehoseinzade             | probably low risk of bias  | probably low risk of bias    | low risk of bias     | low risk of bias       | probably low risk of bias |       |
| ACEi/ARB                                  | calcium channel blockers | 34054                                | Nouri-Vaskeh               | low risk of bias           | low risk of bias             | low risk of bias     | low risk of bias       | probably low risk of bias |       |
| ACEi/ARB                                  | standard care/placebo    | 10463, 49441                         | Duarte                     | probably high risk of bias | probably high risk of bias   | low risk of bias     | high risk of bias      | low risk of bias          |       |
|                                           |                          | 26081                                | Cohen                      | low risk of bias           | probably high risk of bias   | low risk of bias     | low risk of bias       | low risk of bias          |       |
|                                           |                          | 43232                                | Geriak                     | probably high risk of bias | probably high risk of bias   | low risk of bias     | high risk of bias      | probably low risk of bias |       |
| CCK-A agonist and CCK-B antagonist        | standard care/placebo    | Lattmann                             | Lattmann                   | probably high risk of bias | probably high risk of bias   | low risk of bias     | high risk of bias      | low risk of bias          |       |
| CK2 inhibitor                             | standard care/placebo    | 13070, 26887                         | Cruz                       | probably high risk of bias | probably high risk of bias   | low risk of bias     | high risk of bias      | low risk of bias          |       |
| HIV reverse transcriptase inhibitor       | standard care/placebo    | 8469                                 | Ren                        | probably high risk of bias | probably high risk of bias   | low risk of bias     | high risk of bias      | probably low risk of bias |       |
| IL1 inhibitors                            | standard care/placebo    | Kyriazopoulou                        | Kyriazopoulou              | low risk of bias           | low risk of bias             | low risk of bias     | low risk of bias       | low risk of bias          |       |
|                                           |                          | 54072                                | Caricchio                  | low risk of bias           | low risk of bias             | low risk of bias     | low risk of bias       | low risk of bias          |       |
| IL6 receptor antagonists                  | standard care/placebo    | 33303, Rosas                         | Rosas                      | low risk of bias           | probably high risk of bias   | low risk of bias     | low risk of bias       | low risk of bias          |       |
| eptor antagonists, corticosteroids (sys)  | standard care/placebo    | 16340, 23643                         | Salama                     | probably low risk of bias  | low risk of bias             | low risk of bias     | low risk of bias       | low risk of bias          |       |
|                                           |                          | Talaschian                           | Talaschian                 | probably low risk of bias  | low risk of bias             | low risk of bias     | low risk of bias       | probably low risk of bias |       |
|                                           |                          | Sivapalasingam_P                     | Sivapalasingam_P2          | probably low risk of bias  | low risk of bias             | low risk of bias     | low risk of bias       | low risk of bias          |       |
|                                           |                          | Sivapalasingam_P3                    | Sivapalasingam_P3_C1       | probably low risk of bias  | low risk of bias             | low risk of bias     | low risk of bias       | low risk of bias          |       |
|                                           |                          | Sivapalasingam_P3_C2                 | Sivapalasingam_P3_C2_Criti | probably low risk of bias  | low risk of bias             | low risk of bias     | low risk of bias       | low risk of bias          |       |
|                                           |                          | Sivapalasingam_P3_C3                 | Sivapalasingam_P3_C3_Criti | probably low risk of bias  | low risk of bias             | low risk of bias     | low risk of bias       | low risk of bias          |       |
| JAK inhibitors                            | standard care/placebo    | 62263, Marconi, Marc                 | Marconi                    | low risk of bias           | low risk of bias             | low risk of bias     | low risk of bias       | low risk of bias          |       |
|                                           |                          | 48879                                | Guimarães                  | low risk of bias           | low risk of bias             | low risk of bias     | low risk of bias       | low risk of bias          |       |
|                                           |                          | RUXCOVID                             | RUXCOVID                   | low risk of bias           | low risk of bias             | low risk of bias     | low risk of bias       | low risk of bias          |       |
|                                           |                          | Ely, WHO_COV-BARRIER_Addendum,       | Ely                        | low risk of bias           | low risk of bias             | low risk of bias     | low risk of bias       | low risk of bias          |       |
| L-arginine                                | standard care/placebo    | 64005                                | Florentino                 | low risk of bias           | low risk of bias             | low risk of bias     | low risk of bias       | low risk of bias          |       |
| NSAIDs                                    | paracetamol              | Ravichandran                         | Ravichandran               | probably high risk of bias | probably high risk of bias   | low risk of bias     | high risk of bias      | low risk of bias          |       |
| PF-07321332/ritonavir                     | standard care/placebo    | EPIC-HR                              | EPIC-HR                    | probably low risk of bias  | low risk of bias             | low risk of bias     | low risk of bias       | low risk of bias          |       |
| SGLT2 inhibitors                          | standard care/placebo    | 54586                                | Kosiborod                  | low risk of bias           | low risk of bias             | low risk of bias     | low risk of bias       | low risk of bias          |       |
|                                           |                          | 1284                                 | Zhong                      | low risk of bias           | probably high risk of bias   | low risk of bias     | low risk of bias       | probably low risk of bias |       |
| alpha lipoic acid                         | standard care/placebo    | 1284                                 | Zhong                      | low risk of bias           | probably high risk of bias   | low risk of bias     | low risk of bias       | probably low risk of bias |       |
| andrographolide                           | standard care/placebo    | Wanaratna                            | Wanaratna                  | low risk of bias           | low risk of bias             | low risk of bias     | low risk of bias       | probably low risk of bias |       |
| is, curcuminoids, piperine, resveratro    | standard care/placebo    |                                      |                            |                            |                              |                      |                        |                           |       |

|                                   |                                             |                 |            |                            |                            |                  |                   |                            |
|-----------------------------------|---------------------------------------------|-----------------|------------|----------------------------|----------------------------|------------------|-------------------|----------------------------|
|                                   |                                             | 67818           | Majeed     | probably low risk of bias  | low risk of bias           | low risk of bias | low risk of bias  | low risk of bias           |
| antihypertensive                  | amlodipine, hydroxychloroquine, oseltamivir | 44111           | Elgohary   | low risk of bias           | probably high risk of bias | low risk of bias | high risk of bias | probably high risk of bias |
| antihypertensive                  | standard care/placebo                       |                 |            |                            |                            |                  |                   |                            |
|                                   |                                             | Yakoot          | Yakoot     | low risk of bias           | probably high risk of bias | low risk of bias | high risk of bias | low risk of bias           |
|                                   |                                             | 29517           | Nourian    | low risk of bias           | high risk of bias          | low risk of bias | high risk of bias | probably low risk of bias  |
|                                   |                                             | Mobarak         | Mobarak    | probably low risk of bias  | low risk of bias           | low risk of bias | low risk of bias  | probably low risk of bias  |
|                                   |                                             | 45668           | Sayad      | low risk of bias           | probably high risk of bias | low risk of bias | high risk of bias | probably low risk of bias  |
| artemisinin                       | standard care/placebo                       |                 |            |                            |                            |                  |                   |                            |
|                                   |                                             |                 | Trieu      | probably high risk of bias | probably high risk of bias | low risk of bias | high risk of bias | low risk of bias           |
| aspirin                           | aspirin, atorvastatin                       |                 |            |                            |                            |                  |                   |                            |
|                                   |                                             | Ghati           | Ghati      | probably high risk of bias | probably high risk of bias | low risk of bias | high risk of bias | probably low risk of bias  |
| aspirin                           | standard care/placebo                       |                 |            |                            |                            |                  |                   |                            |
|                                   |                                             | Ghati           | Ghati      | probably high risk of bias | probably high risk of bias | low risk of bias | high risk of bias | probably low risk of bias  |
| aspirin                           | statins                                     |                 |            |                            |                            |                  |                   |                            |
|                                   |                                             | Ghati           | Ghati      | probably high risk of bias | probably high risk of bias | low risk of bias | high risk of bias | probably low risk of bias  |
| aspirin, atorvastatin             | standard care/placebo                       |                 |            |                            |                            |                  |                   |                            |
|                                   |                                             | Ghati           | Ghati      | probably high risk of bias | probably high risk of bias | low risk of bias | high risk of bias | probably low risk of bias  |
| aspirin, atorvastatin             | statins                                     |                 |            |                            |                            |                  |                   |                            |
|                                   |                                             | Ghati           | Ghati      | probably high risk of bias | probably high risk of bias | low risk of bias | high risk of bias | probably low risk of bias  |
| azithromycin                      | azithromycin, hydroxychloroquine            |                 |            |                            |                            |                  |                   |                            |
|                                   |                                             | 31471           | Purwati    | probably low risk of bias  | low risk of bias           | low risk of bias | low risk of bias  | probably low risk of bias  |
| azithromycin                      | azithromycin, lopinavir-ritonavir           |                 |            |                            |                            |                  |                   |                            |
|                                   |                                             | 31471           | Purwati    | probably low risk of bias  | low risk of bias           | low risk of bias | low risk of bias  | probably low risk of bias  |
| azithromycin                      | doxycycline, lopinavir-ritonavir            |                 |            |                            |                            |                  |                   |                            |
|                                   |                                             | 31471           | Purwati    | probably low risk of bias  | low risk of bias           | low risk of bias | low risk of bias  | probably low risk of bias  |
| azithromycin                      | hydroxychloroquine                          |                 |            |                            |                            |                  |                   |                            |
|                                   |                                             | 18375           | Brown      | low risk of bias           | high risk of bias          | low risk of bias | high risk of bias | low risk of bias           |
| azithromycin                      | standard care/placebo                       |                 |            |                            |                            |                  |                   |                            |
|                                   |                                             | 11639, 12378    | Sekhavi    | probably high risk of bias | probably high risk of bias | low risk of bias | high risk of bias | probably low risk of bias  |
| azithromycin, hydroxychloroquine  | azithromycin, lopinavir-ritonavir           |                 |            |                            |                            |                  |                   |                            |
|                                   |                                             | 31471           | Purwati    | probably low risk of bias  | low risk of bias           | low risk of bias | low risk of bias  | probably low risk of bias  |
| azithromycin, hydroxychloroquine  | doxycycline                                 |                 |            |                            |                            |                  |                   |                            |
|                                   |                                             | Sobngwi         | Sobngwi    | low risk of bias           | probably high risk of bias | low risk of bias | high risk of bias | probably low risk of bias  |
| azithromycin, hydroxychloroquine  | doxycycline, lopinavir-ritonavir            |                 |            |                            |                            |                  |                   |                            |
|                                   |                                             | 31471           | Purwati    | probably low risk of bias  | low risk of bias           | low risk of bias | low risk of bias  | probably low risk of bias  |
| azithromycin, hydroxychloroquine  | hydroxychloroquine                          |                 |            |                            |                            |                  |                   |                            |
|                                   |                                             | 20005           | Omrani     | low risk of bias           | low risk of bias           | low risk of bias | low risk of bias  | low risk of bias           |
|                                   |                                             | 33489, Johnston | Johnston   | probably low risk of bias  | low risk of bias           | low risk of bias | low risk of bias  | low risk of bias           |
| azithromycin, hydroxychloroquine  | standard care/placebo                       |                 |            |                            |                            |                  |                   |                            |
|                                   |                                             | 20005           | Omrani     | low risk of bias           | low risk of bias           | low risk of bias | low risk of bias  | low risk of bias           |
|                                   |                                             | 33489, Johnston | Johnston   | probably low risk of bias  | low risk of bias           | low risk of bias | low risk of bias  | low risk of bias           |
|                                   |                                             | 48002           | Sivapalan  | low risk of bias           | low risk of bias           | low risk of bias | low risk of bias  | probably low risk of bias  |
|                                   |                                             | Babalola_2      | Babalola_2 | probably high risk of bias | probably high risk of bias | low risk of bias | high risk of bias | probably low risk of bias  |
| azithromycin, lopinavir-ritonavir | doxycycline, lopinavir-ritonavir            |                 |            |                            |                            |                  |                   |                            |
|                                   |                                             | 31471           | Purwati    | probably low risk of bias  | low risk of bias           | low risk of bias | low risk of bias  | probably low risk of bias  |
| berberine                         | standard care/placebo                       |                 |            |                            |                            |                  |                   |                            |

|                                          |                                            |                                                                |                                                                |                                                                                                                                |                                                                                                                                           |                                                                                                  |                                                                                                       |                                                                                                                    |
|------------------------------------------|--------------------------------------------|----------------------------------------------------------------|----------------------------------------------------------------|--------------------------------------------------------------------------------------------------------------------------------|-------------------------------------------------------------------------------------------------------------------------------------------|--------------------------------------------------------------------------------------------------|-------------------------------------------------------------------------------------------------------|--------------------------------------------------------------------------------------------------------------------|
|                                          |                                            | 21845                                                          | Zhang                                                          | probably high risk of bias                                                                                                     | probably high risk of bias                                                                                                                | low risk of bias                                                                                 | high risk of bias                                                                                     | probably low risk of bias                                                                                          |
| bromhexine hydrochloride                 | standard care/placebo                      | 12212                                                          | Li_3                                                           | low risk of bias                                                                                                               | probably high risk of bias                                                                                                                | low risk of bias                                                                                 | high risk of bias                                                                                     | probably low risk of bias                                                                                          |
| cannabidiol                              | standard care/placebo                      | 66954                                                          | Crippa                                                         | probably low risk of bias                                                                                                      | low risk of bias                                                                                                                          | low risk of bias                                                                                 | low risk of bias                                                                                      | low risk of bias                                                                                                   |
| chlorhexidine gluconate mouthwash        | hydrogen peroxide mouthwash                | Chaudhary                                                      | Chaudhary                                                      | probably low risk of bias                                                                                                      | low risk of bias                                                                                                                          | low risk of bias                                                                                 | low risk of bias                                                                                      | probably low risk of bias                                                                                          |
| chlorhexidine gluconate mouthwash        | povidone-iodine mouthwash                  | Chaudhary                                                      | Chaudhary                                                      | probably low risk of bias                                                                                                      | low risk of bias                                                                                                                          | low risk of bias                                                                                 | low risk of bias                                                                                      | probably low risk of bias                                                                                          |
| chlorhexidine gluconate mouthwash        | saline mouthwash                           | Chaudhary                                                      | Chaudhary                                                      | probably low risk of bias                                                                                                      | low risk of bias                                                                                                                          | low risk of bias                                                                                 | low risk of bias                                                                                      | probably low risk of bias                                                                                          |
| chloroquine                              | hydroxychloroquine                         | 6987                                                           | Chen_4                                                         | probably high risk of bias                                                                                                     | probably high risk of bias                                                                                                                | high risk of bias                                                                                | high risk of bias                                                                                     | low risk of bias                                                                                                   |
| chloroquine                              | standard care/placebo                      | 6987                                                           | Chen_4                                                         | probably high risk of bias                                                                                                     | probably high risk of bias                                                                                                                | high risk of bias                                                                                | high risk of bias                                                                                     | low risk of bias                                                                                                   |
| colchicine                               | standard care/placebo                      | 7189<br>10500, xx<br>64385                                     | Deftereos<br>Lopes_2<br>Pascual-Figal                          | low risk of bias<br>probably low risk of bias<br>low risk of bias                                                              | probably high risk of bias<br>low risk of bias<br>probably high risk of bias                                                              | low risk of bias<br>low risk of bias<br>low risk of bias                                         | high risk of bias<br>low risk of bias<br>probably high risk of bias                                   | low risk of bias<br>probably low risk of bias<br>probably low risk of bias                                         |
| lchicine, emtricitabine, tenofovir, stat | emtricitabine, tenofovir                   | Gaitan-Duarte                                                  | Gaitan-Duarte                                                  | low risk of bias                                                                                                               | probably high risk of bias                                                                                                                | low risk of bias                                                                                 | low risk of bias                                                                                      | low risk of bias                                                                                                   |
| lchicine, emtricitabine, tenofovir, stat | standard care/placebo                      | Gaitan-Duarte                                                  | Gaitan-Duarte                                                  | low risk of bias                                                                                                               | probably high risk of bias                                                                                                                | low risk of bias                                                                                 | low risk of bias                                                                                      | low risk of bias                                                                                                   |
| colchicine, statin                       | lchicine, emtricitabine, tenofovir, statin | Gaitan-Duarte                                                  | Gaitan-Duarte                                                  | low risk of bias                                                                                                               | probably high risk of bias                                                                                                                | low risk of bias                                                                                 | low risk of bias                                                                                      | low risk of bias                                                                                                   |
| colchicine, statin                       | emtricitabine, tenofovir                   | Gaitan-Duarte                                                  | Gaitan-Duarte                                                  | low risk of bias                                                                                                               | probably high risk of bias                                                                                                                | low risk of bias                                                                                 | low risk of bias                                                                                      | low risk of bias                                                                                                   |
| colchicine, statin                       | standard care/placebo                      | Gaitan-Duarte                                                  | Gaitan-Duarte                                                  | low risk of bias                                                                                                               | probably high risk of bias                                                                                                                | low risk of bias                                                                                 | low risk of bias                                                                                      | low risk of bias                                                                                                   |
| diammonium glycyrrhizinate               | standard care/placebo                      | C195                                                           | Zhou                                                           | probably high risk of bias                                                                                                     | probably high risk of bias                                                                                                                | low risk of bias                                                                                 | high risk of bias                                                                                     | probably low risk of bias                                                                                          |
| doxycycline, ivermectin                  | standard care/placebo                      | 43517                                                          | Mahmud                                                         | low risk of bias                                                                                                               | low risk of bias                                                                                                                          | low risk of bias                                                                                 | low risk of bias                                                                                      | probably low risk of bias                                                                                          |
| electrolyzed saline                      | standard care/placebo                      | 13074, 53789                                                   | Delgado-Enciso                                                 | probably high risk of bias                                                                                                     | probably high risk of bias                                                                                                                | low risk of bias                                                                                 | high risk of bias                                                                                     | low risk of bias                                                                                                   |
| emtricitabine, tenofovir                 | standard care/placebo                      | 50792<br>Gaitan-Duarte                                         | Parienti<br>Gaitan-Duarte                                      | low risk of bias<br>low risk of bias                                                                                           | probably high risk of bias<br>probably high risk of bias                                                                                  | low risk of bias<br>low risk of bias                                                             | high risk of bias<br>high risk of bias                                                                | low risk of bias<br>low risk of bias                                                                               |
| famotidine                               | standard care/placebo                      | Samimagham                                                     | Samimagham                                                     | low risk of bias                                                                                                               | probably high risk of bias                                                                                                                | low risk of bias                                                                                 | high risk of bias                                                                                     | probably low risk of bias                                                                                          |
| favipiravir                              | standard care/placebo                      | 10147, 10287, 997<br>32588<br>24988, Udwadia<br>32586<br>60646 | Ivashchenko<br>Ruzhentsova<br>Udwadia<br>Balykova_2<br>Shinkai | probably high risk of bias<br>probably high risk of bias<br>probably high risk of bias<br>low risk of bias<br>low risk of bias | high risk of bias<br>probably high risk of bias<br>probably high risk of bias<br>probably high risk of bias<br>probably high risk of bias | low risk of bias<br>low risk of bias<br>low risk of bias<br>low risk of bias<br>low risk of bias | high risk of bias<br>high risk of bias<br>high risk of bias<br>high risk of bias<br>high risk of bias | probably low risk of bias<br>low risk of bias<br>low risk of bias<br>low risk of bias<br>probably low risk of bias |
| fluvoxamine                              | standard care/placebo                      |                                                                |                                                                |                                                                                                                                |                                                                                                                                           |                                                                                                  |                                                                                                       |                                                                                                                    |

|                                      |                                      |                                                                                                                                                                     |                                                                                                                                                                   |                                                                                                                                                                                                                                                                                                                                       |                                                                                                                                                                                                                                                                                                                                                                                |                                                                                                                                                                                                                                                                                                                        |                                                                                                                                                                                                                                                                                                                                      |                                                                                                                                                                                                                                                                                                                           |
|--------------------------------------|--------------------------------------|---------------------------------------------------------------------------------------------------------------------------------------------------------------------|-------------------------------------------------------------------------------------------------------------------------------------------------------------------|---------------------------------------------------------------------------------------------------------------------------------------------------------------------------------------------------------------------------------------------------------------------------------------------------------------------------------------|--------------------------------------------------------------------------------------------------------------------------------------------------------------------------------------------------------------------------------------------------------------------------------------------------------------------------------------------------------------------------------|------------------------------------------------------------------------------------------------------------------------------------------------------------------------------------------------------------------------------------------------------------------------------------------------------------------------|--------------------------------------------------------------------------------------------------------------------------------------------------------------------------------------------------------------------------------------------------------------------------------------------------------------------------------------|---------------------------------------------------------------------------------------------------------------------------------------------------------------------------------------------------------------------------------------------------------------------------------------------------------------------------|
|                                      |                                      | 18818                                                                                                                                                               | Lenze                                                                                                                                                             | low risk of bias                                                                                                                                                                                                                                                                                                                      | low risk of bias                                                                                                                                                                                                                                                                                                                                                               | high risk of bias                                                                                                                                                                                                                                                                                                      | low risk of bias                                                                                                                                                                                                                                                                                                                     | low risk of bias                                                                                                                                                                                                                                                                                                          |
| full-dose anticoagulation            | standard care/placebo                | 64008                                                                                                                                                               | Ananworanich                                                                                                                                                      | probably low risk of bias                                                                                                                                                                                                                                                                                                             | low risk of bias                                                                                                                                                                                                                                                                                                                                                               | low risk of bias                                                                                                                                                                                                                                                                                                       | low risk of bias                                                                                                                                                                                                                                                                                                                     | low risk of bias                                                                                                                                                                                                                                                                                                          |
| hydrogen peroxide mouthwash          | povidone-iodine mouthwash            | Chaudhary                                                                                                                                                           | Chaudhary                                                                                                                                                         | probably low risk of bias                                                                                                                                                                                                                                                                                                             | low risk of bias                                                                                                                                                                                                                                                                                                                                                               | low risk of bias                                                                                                                                                                                                                                                                                                       | low risk of bias                                                                                                                                                                                                                                                                                                                     | probably low risk of bias                                                                                                                                                                                                                                                                                                 |
| hydrogen peroxide mouthwash          | saline mouthwash                     | Chaudhary                                                                                                                                                           | Chaudhary                                                                                                                                                         | probably low risk of bias                                                                                                                                                                                                                                                                                                             | low risk of bias                                                                                                                                                                                                                                                                                                                                                               | low risk of bias                                                                                                                                                                                                                                                                                                       | low risk of bias                                                                                                                                                                                                                                                                                                                     | probably low risk of bias                                                                                                                                                                                                                                                                                                 |
| hydroxychloroquine                   | interferon beta, lopinavir-ritonavir | 45662, Ader_1                                                                                                                                                       | Ader_1                                                                                                                                                            | low risk of bias                                                                                                                                                                                                                                                                                                                      | probably high risk of bias                                                                                                                                                                                                                                                                                                                                                     | low risk of bias                                                                                                                                                                                                                                                                                                       | high risk of bias                                                                                                                                                                                                                                                                                                                    | low risk of bias                                                                                                                                                                                                                                                                                                          |
| hydroxychloroquine                   | lopinavir-ritonavir                  | Reis_1<br>45662, Ader_1                                                                                                                                             | Reis_1<br>Ader_1                                                                                                                                                  | low risk of bias<br>low risk of bias                                                                                                                                                                                                                                                                                                  | low risk of bias<br>probably high risk of bias                                                                                                                                                                                                                                                                                                                                 | probably high risk of bias<br>low risk of bias                                                                                                                                                                                                                                                                         | low risk of bias<br>high risk of bias                                                                                                                                                                                                                                                                                                | low risk of bias<br>low risk of bias                                                                                                                                                                                                                                                                                      |
| hydroxychloroquine                   | remdesivir                           | 31188, 52761                                                                                                                                                        | Barratt-Due                                                                                                                                                       | low risk of bias                                                                                                                                                                                                                                                                                                                      | probably high risk of bias                                                                                                                                                                                                                                                                                                                                                     | low risk of bias                                                                                                                                                                                                                                                                                                       | high risk of bias                                                                                                                                                                                                                                                                                                                    | probably low risk of bias                                                                                                                                                                                                                                                                                                 |
| hydroxychloroquine                   | standard care/placebo                | 3321, 776<br>C158<br>6987<br>16085, 38308<br>20005<br>Reis_1<br>33489, Johnston<br>45662, Ader_1<br>29663<br>31188, 52761<br>41434<br>Byakika-Kibwika<br>Schwartz_2 | Tang_1<br>Chen_3<br>Chen_4<br>Dub  e<br>Omrani<br>Reis_1<br>Johnston<br>Ader_1<br>Hernandez-Cardenas<br>Barratt-Due<br>R  a-Neto<br>Byakika-Kibwika<br>Schwartz_2 | low risk of bias<br>probably high risk of bias<br>probably high risk of bias<br>low risk of bias<br>low risk of bias<br>low risk of bias<br>probably low risk of bias<br>low risk of bias | probably high risk of bias<br>probably high risk of bias<br>probably high risk of bias<br>low risk of bias<br>low risk of bias<br>low risk of bias<br>low risk of bias<br>probably high risk of bias<br>low risk of bias<br>probably high risk of bias<br>probably high risk of bias<br>probably high risk of bias<br>low risk of bias<br>low risk of bias<br>low risk of bias | low risk of bias<br>low risk of bias<br>high risk of bias<br>low risk of bias<br>low risk of bias<br>probably high risk of bias<br>low risk of bias<br>low risk of bias<br>high risk of bias<br>low risk of bias<br>high risk of bias<br>high risk of bias<br>low risk of bias<br>low risk of bias<br>low risk of bias | high risk of bias<br>high risk of bias<br>high risk of bias<br>low risk of bias<br>low risk of bias<br>low risk of bias<br>low risk of bias<br>high risk of bias<br>low risk of bias<br>high risk of bias<br>high risk of bias<br>high risk of bias<br>high risk of bias<br>low risk of bias<br>low risk of bias<br>low risk of bias | low risk of bias<br>probably low risk of bias<br>low risk of bias<br>probably high risk of bias<br>probably low risk of bias<br>low risk of bias<br>low risk of bias<br>low risk of bias<br>probably low risk of bias |
| hydroxychloroquine, rivabirin        | lopinavir-ritonavir, ribavirin       | 46308_severe                                                                                                                                                        | Singh_3                                                                                                                                                           | probably high risk of bias                                                                                                                                                                                                                                                                                                            | probably high risk of bias                                                                                                                                                                                                                                                                                                                                                     | low risk of bias                                                                                                                                                                                                                                                                                                       | high risk of bias                                                                                                                                                                                                                                                                                                                    | low risk of bias                                                                                                                                                                                                                                                                                                          |
| hydroxychloroquine, rivabirin        | standard care/placebo                | 46308_severe                                                                                                                                                        | Singh_3                                                                                                                                                           | probably high risk of bias                                                                                                                                                                                                                                                                                                            | probably high risk of bias                                                                                                                                                                                                                                                                                                                                                     | low risk of bias                                                                                                                                                                                                                                                                                                       | high risk of bias                                                                                                                                                                                                                                                                                                                    | low risk of bias                                                                                                                                                                                                                                                                                                          |
| inhaled nebulised interferon beta-1a | standard care/placebo                | 18657                                                                                                                                                               | Monk                                                                                                                                                              | low risk of bias                                                                                                                                                                                                                                                                                                                      | low risk of bias                                                                                                                                                                                                                                                                                                                                                               | probably high risk of bias                                                                                                                                                                                                                                                                                             | low risk of bias                                                                                                                                                                                                                                                                                                                     | low risk of bias                                                                                                                                                                                                                                                                                                          |
| inhaled pan-JAK inhibitor            | standard care/placebo                | 34842                                                                                                                                                               | Singh_1                                                                                                                                                           | probably low risk of bias                                                                                                                                                                                                                                                                                                             | low risk of bias                                                                                                                                                                                                                                                                                                                                                               | low risk of bias                                                                                                                                                                                                                                                                                                       | low risk of bias                                                                                                                                                                                                                                                                                                                     | probably low risk of bias                                                                                                                                                                                                                                                                                                 |
| interferon alpha                     | combinant super combinant interferon | 32737, 7, 9574                                                                                                                                                      | Li_2                                                                                                                                                              | probably high risk of bias                                                                                                                                                                                                                                                                                                            | probably high risk of bias                                                                                                                                                                                                                                                                                                                                                     | low risk of bias                                                                                                                                                                                                                                                                                                       | high risk of bias                                                                                                                                                                                                                                                                                                                    | low risk of bias                                                                                                                                                                                                                                                                                                          |
| interferon beta                      | standard care/placebo                | 39381, Darazam (2<br>Kalil_2<br>11243, 5514, 824                                                                                                                    | Darazam_2<br>Kalil_2<br>Davoudi-Monfared                                                                                                                          | low risk of bias<br>low risk of bias<br>low risk of bias                                                                                                                                                                                                                                                                              | probably high risk of bias<br>low risk of bias<br>high risk of bias                                                                                                                                                                                                                                                                                                            | low risk of bias<br>low risk of bias<br>probably high risk of bias                                                                                                                                                                                                                                                     | high risk of bias<br>low risk of bias<br>high risk of bias                                                                                                                                                                                                                                                                           | probably low risk of bias<br>low risk of bias<br>low risk of bias                                                                                                                                                                                                                                                         |
| interferon beta, lopinavir-ritonavir | lopinavir-ritonavir                  | 45662, Ader_1                                                                                                                                                       | Ader_1                                                                                                                                                            | low risk of bias                                                                                                                                                                                                                                                                                                                      | probably high risk of bias                                                                                                                                                                                                                                                                                                                                                     | low risk of bias                                                                                                                                                                                                                                                                                                       | high risk of bias                                                                                                                                                                                                                                                                                                                    | low risk of bias                                                                                                                                                                                                                                                                                                          |
| interferon beta, lopinavir-ritonavir | standard care/placebo                | 45662, Ader_1                                                                                                                                                       | Ader_1                                                                                                                                                            | low risk of bias                                                                                                                                                                                                                                                                                                                      | probably high risk of bias                                                                                                                                                                                                                                                                                                                                                     | low risk of bias                                                                                                                                                                                                                                                                                                       | high risk of bias                                                                                                                                                                                                                                                                                                                    | low risk of bias                                                                                                                                                                                                                                                                                                          |
| interferon beta, ribavirin           | standard care/placebo                | 2942                                                                                                                                                                | Hung                                                                                                                                                              | probably high risk of bias                                                                                                                                                                                                                                                                                                            | probably high risk of bias                                                                                                                                                                                                                                                                                                                                                     | low risk of bias                                                                                                                                                                                                                                                                                                       | high risk of bias                                                                                                                                                                                                                                                                                                                    | low risk of bias                                                                                                                                                                                                                                                                                                          |
| interferon kappa, trefoil factor 2   | standard care/placebo                | 13797                                                                                                                                                               | Fu                                                                                                                                                                | probably high risk of bias                                                                                                                                                                                                                                                                                                            | probably high risk of bias                                                                                                                                                                                                                                                                                                                                                     | low risk of bias                                                                                                                                                                                                                                                                                                       | high risk of bias                                                                                                                                                                                                                                                                                                                    | low risk of bias                                                                                                                                                                                                                                                                                                          |

|                                     |                                |                                                                                  |                                                                               |                                                                                                                                         |                                                                                                                                                    |                                                                                                                      |                                                                                                                         |                                                                                                                                        |
|-------------------------------------|--------------------------------|----------------------------------------------------------------------------------|-------------------------------------------------------------------------------|-----------------------------------------------------------------------------------------------------------------------------------------|----------------------------------------------------------------------------------------------------------------------------------------------------|----------------------------------------------------------------------------------------------------------------------|-------------------------------------------------------------------------------------------------------------------------|----------------------------------------------------------------------------------------------------------------------------------------|
| intranasal corticosteroids          | standard care/placebo          | 57833<br>Clemency                                                                | Song<br>Clemency                                                              | probably high risk of bias<br>low risk of bias                                                                                          | probably high risk of bias<br>low risk of bias                                                                                                     | low risk of bias<br>low risk of bias                                                                                 | high risk of bias<br>low risk of bias                                                                                   | low risk of bias<br>probably low risk of bias                                                                                          |
| intranasal hypertonic polymer spray | standard care/placebo          | 47065                                                                            | Shrivastava                                                                   | probably high risk of bias                                                                                                              | probably high risk of bias                                                                                                                         | low risk of bias                                                                                                     | high risk of bias                                                                                                       | low risk of bias                                                                                                                       |
| itolizumab                          | standard care/placebo          | 21347, Kumar                                                                     | Kumar_1                                                                       | probably high risk of bias                                                                                                              | probably high risk of bias                                                                                                                         | low risk of bias                                                                                                     | high risk of bias                                                                                                       | probably low risk of bias                                                                                                              |
| itraconazole                        | standard care/placebo          | 36093, Liesenborgl                                                               | Liesenborghs                                                                  | probably high risk of bias                                                                                                              | probably high risk of bias                                                                                                                         | low risk of bias                                                                                                     | high risk of bias                                                                                                       | low risk of bias                                                                                                                       |
| ivermectin                          | lopinavir-ritonavir            | 25394, Babalola                                                                  | Babalola                                                                      | low risk of bias                                                                                                                        | low risk of bias                                                                                                                                   | low risk of bias                                                                                                     | low risk of bias                                                                                                        | probably low risk of bias                                                                                                              |
| ivermectin                          | standard care/placebo          | 49440, Krolewieck<br>34416, 41159, Lopi<br>35667<br>Chahla<br>51938<br>Buonfrate | Krolewiecki<br>Lopez-Medina<br>Pott-Junior<br>Chahla<br>Vallejos<br>Buonfrate | low risk of bias<br>low risk of bias<br>low risk of bias<br>probably high risk of bias<br>probably low risk of bias<br>low risk of bias | probably high risk of bias<br>low risk of bias<br>probably high risk of bias<br>probably high risk of bias<br>low risk of bias<br>low risk of bias | low risk of bias<br>low risk of bias | high risk of bias<br>low risk of bias<br>high risk of bias<br>high risk of bias<br>low risk of bias<br>low risk of bias | low risk of bias<br>low risk of bias<br>probably low risk of bias<br>probably low risk of bias<br>low risk of bias<br>low risk of bias |
| leflunomide                         | standard care/placebo          | 13540                                                                            | Wang_5                                                                        | probably high risk of bias                                                                                                              | probably high risk of bias                                                                                                                         | low risk of bias                                                                                                     | high risk of bias                                                                                                       | probably low risk of bias                                                                                                              |
| leronlimab                          | standard care/placebo          | 36109                                                                            | Skendelas                                                                     | probably low risk of bias                                                                                                               | low risk of bias                                                                                                                                   | low risk of bias                                                                                                     | low risk of bias                                                                                                        | probably low risk of bias                                                                                                              |
| levamisole                          | standard care/placebo          | 37198, Roostaei Firoz                                                            | Roostaei Firozabad                                                            | probably low risk of bias                                                                                                               | low risk of bias                                                                                                                                   | low risk of bias                                                                                                     | low risk of bias                                                                                                        | low risk of bias                                                                                                                       |
| lopinavir-ritonavir                 | lopinavir-ritonavir, novaferon | 10121, 2338                                                                      | Zheng                                                                         | probably high risk of bias                                                                                                              | probably high risk of bias                                                                                                                         | low risk of bias                                                                                                     | high risk of bias                                                                                                       | low risk of bias                                                                                                                       |
| lopinavir-ritonavir                 | lopinavir-ritonavir, ribavirin | 10067, 2615                                                                      | Huang_2                                                                       | probably high risk of bias                                                                                                              | probably high risk of bias                                                                                                                         | low risk of bias                                                                                                     | high risk of bias                                                                                                       | low risk of bias                                                                                                                       |
| lopinavir-ritonavir                 | novaferon                      | 10121, 2338                                                                      | Zheng                                                                         | probably high risk of bias                                                                                                              | probably high risk of bias                                                                                                                         | low risk of bias                                                                                                     | high risk of bias                                                                                                       | low risk of bias                                                                                                                       |
| lopinavir-ritonavir                 | ribavirin                      | 10067, 2615                                                                      | Huang_2                                                                       | probably high risk of bias                                                                                                              | probably high risk of bias                                                                                                                         | low risk of bias                                                                                                     | high risk of bias                                                                                                       | low risk of bias                                                                                                                       |
| lopinavir-ritonavir                 | standard care/placebo          | 1243, 234<br>Reis_1<br>45662, Ader_1                                             | Li<br>Reis_1<br>Ader_1                                                        | low risk of bias<br>low risk of bias<br>low risk of bias                                                                                | probably high risk of bias<br>low risk of bias<br>probably high risk of bias                                                                       | low risk of bias<br>probably high risk of bias<br>low risk of bias                                                   | probably low risk of bias<br>low risk of bias<br>high risk of bias                                                      | probably low risk of bias<br>low risk of bias<br>low risk of bias                                                                      |
| lopinavir-ritonavir                 | umifenovir                     | 1243, 234                                                                        | Li                                                                            | low risk of bias                                                                                                                        | probably high risk of bias                                                                                                                         | low risk of bias                                                                                                     | probably low risk of bias                                                                                               | probably low risk of bias                                                                                                              |
| lopinavir-ritonavir, novaferon      | novaferon                      | 10121, 2338                                                                      | Zheng                                                                         | probably high risk of bias                                                                                                              | probably high risk of bias                                                                                                                         | low risk of bias                                                                                                     | high risk of bias                                                                                                       | low risk of bias                                                                                                                       |
| lopinavir-ritonavir, ribavirin      | ribavirin                      | 10067, 2615                                                                      | Huang_2                                                                       | probably high risk of bias                                                                                                              | probably high risk of bias                                                                                                                         | low risk of bias                                                                                                     | high risk of bias                                                                                                       | low risk of bias                                                                                                                       |
| lopinavir-ritonavir, ribavirin      | standard care/placebo          | 46308_severe                                                                     | Singh_3                                                                       | probably high risk of bias                                                                                                              | probably high risk of bias                                                                                                                         | low risk of bias                                                                                                     | high risk of bias                                                                                                       | low risk of bias                                                                                                                       |
| melatonin                           | standard care/placebo          | Farnoosh                                                                         | Farnoosh                                                                      | probably low risk of bias                                                                                                               | low risk of bias                                                                                                                                   | high risk of bias                                                                                                    | low risk of bias                                                                                                        | probably low risk of bias                                                                                                              |
| molnupiravir                        | standard care/placebo          |                                                                                  |                                                                               |                                                                                                                                         |                                                                                                                                                    |                                                                                                                      |                                                                                                                         |                                                                                                                                        |

|                                   |                                         |                                                                                                           |                                                                               |                                                                                                                                                              |                                                                                                                                                                         |                                                                                                                                                   |                                                                                                                                                       |                                                                                                                                                                      |                              |
|-----------------------------------|-----------------------------------------|-----------------------------------------------------------------------------------------------------------|-------------------------------------------------------------------------------|--------------------------------------------------------------------------------------------------------------------------------------------------------------|-------------------------------------------------------------------------------------------------------------------------------------------------------------------------|---------------------------------------------------------------------------------------------------------------------------------------------------|-------------------------------------------------------------------------------------------------------------------------------------------------------|----------------------------------------------------------------------------------------------------------------------------------------------------------------------|------------------------------|
|                                   |                                         | 41971<br>46473, Fischer<br>MOVE-OUT (MK4482-002)<br>CR216-21<br>CTRI/2021/06/0339<br>HCR/III/MOLCOV/04/20 | Khoo<br>Fischer<br>Vyas<br>Krishnan<br>Kumar_2                                | probably high risk of bias<br>low risk of bias<br>probably low risk of bias<br>low risk of bias<br>low risk of bias<br>probably high risk of bias            | high risk of bias<br>low risk of bias<br>low risk of bias<br>probably high risk of bias<br>probably high risk of bias<br>probably high risk of bias                     | low risk of bias<br>low risk of bias                              | high risk of bias<br>low risk of bias<br>low risk of bias<br>high risk of bias<br>high risk of bias<br>high risk of bias                              | low risk of bias<br>low risk of bias<br>low risk of bias<br>low risk of bias<br>low risk of bias<br>probably low risk of bias                                        | Terminated early for benefit |
| mometasone nasal spray            | factory training, standard care/placebo | 48548                                                                                                     | Kasiri                                                                        | probably low risk of bias                                                                                                                                    | low risk of bias                                                                                                                                                        | low risk of bias                                                                                                                                  | low risk of bias                                                                                                                                      | low risk of bias                                                                                                                                                     |                              |
| nitazoxanide                      | standard care/placebo                   | 16339, 24799<br>50790, Blum<br>Silva<br>Rossignol                                                         | Rocco<br>Blum<br>Silva<br>Rossignol                                           | low risk of bias<br>low risk of bias<br>low risk of bias<br>low risk of bias                                                                                 | low risk of bias<br>low risk of bias<br>probably high risk of bias<br>low risk of bias                                                                                  | low risk of bias<br>low risk of bias<br>low risk of bias<br>low risk of bias                                                                      | low risk of bias<br>low risk of bias<br>probably high risk of bias<br>low risk of bias                                                                | low risk of bias<br>probably low risk of bias<br>probably low risk of bias<br>probably low risk of bias                                                              |                              |
| nitric oxide                      | standard care/placebo                   | Moni                                                                                                      | Moni                                                                          | low risk of bias                                                                                                                                             | probably high risk of bias                                                                                                                                              | probably low risk of bias                                                                                                                         | high risk of bias                                                                                                                                     | probably low risk of bias                                                                                                                                            |                              |
| omega 3                           | standard care/placebo                   | 60421                                                                                                     | Kosmopoulos                                                                   | low risk of bias                                                                                                                                             | probably high risk of bias                                                                                                                                              | low risk of bias                                                                                                                                  | high risk of bias                                                                                                                                     | probably low risk of bias                                                                                                                                            |                              |
| opaganib                          | standard care/placebo                   | Winthrop                                                                                                  | Winthrop                                                                      | low risk of bias                                                                                                                                             | low risk of bias                                                                                                                                                        | low risk of bias                                                                                                                                  | low risk of bias                                                                                                                                      | low risk of bias                                                                                                                                                     |                              |
| pentoxifylline                    | standard care/placebo                   | 21098                                                                                                     | Malonado                                                                      | probably high risk of bias                                                                                                                                   | probably high risk of bias                                                                                                                                              | high risk of bias                                                                                                                                 | high risk of bias                                                                                                                                     | probably low risk of bias                                                                                                                                            |                              |
| povidone-iodine mouthwash         | saline mouthwash                        | Chaudhary                                                                                                 | Chaudhary                                                                     | probably low risk of bias                                                                                                                                    | low risk of bias                                                                                                                                                        | low risk of bias                                                                                                                                  | low risk of bias                                                                                                                                      | probably low risk of bias                                                                                                                                            |                              |
| probiotics                        | standard care/placebo                   | 44556                                                                                                     | Gutiérrez-Castrellón                                                          | low risk of bias                                                                                                                                             | low risk of bias                                                                                                                                                        | low risk of bias                                                                                                                                  | low risk of bias                                                                                                                                      | low risk of bias                                                                                                                                                     |                              |
| progesterone                      | standard care/placebo                   | 32075, Ghandehai                                                                                          | Ghandehari                                                                    | probably high risk of bias                                                                                                                                   | probably high risk of bias                                                                                                                                              | low risk of bias                                                                                                                                  | probably high risk of bias                                                                                                                            | probably low risk of bias                                                                                                                                            |                              |
| proxalutamide                     | standard care/placebo                   | 33610<br>Cadegiani (female col)                                                                           | Cadegiani_3<br>Cadegiani_4                                                    | high risk of bias<br>high risk of bias                                                                                                                       | low risk of bias<br>low risk of bias                                                                                                                                    | low risk of bias<br>low risk of bias                                                                                                              | low risk of bias<br>low risk of bias                                                                                                                  | probably low risk of bias<br>probably low risk of bias                                                                                                               | Terminated early for benefit |
| pyridostigmine                    | standard care/placebo                   | Fragoso-Saavedra                                                                                          | Fragoso-Saavedra                                                              | probably low risk of bias                                                                                                                                    | low risk of bias                                                                                                                                                        | low risk of bias                                                                                                                                  | low risk of bias                                                                                                                                      | probably low risk of bias                                                                                                                                            |                              |
| quercetin                         | standard care/placebo                   | 51397                                                                                                     | Di Pierro_2                                                                   | probably high risk of bias                                                                                                                                   | probably high risk of bias                                                                                                                                              | low risk of bias                                                                                                                                  | high risk of bias                                                                                                                                     | probably low risk of bias                                                                                                                                            |                              |
| remdesivir                        | standard care/placebo                   | 2408<br>11347<br>15633, 3821<br>31188, 52761<br>37778<br>39725<br>Gottlieb_2, PINETR                      | Wang_1<br>Spinner<br>Beigel<br>Barratt-Due<br>Mahajan<br>Criner<br>Gottlieb_2 | low risk of bias<br>low risk of bias<br>low risk of bias<br>low risk of bias<br>high risk of bias<br>probably high risk of bias<br>probably low risk of bias | low risk of bias<br>high risk of bias<br>low risk of bias<br>probably high risk of bias<br>probably high risk of bias<br>probably high risk of bias<br>low risk of bias | low risk of bias<br>probably low risk of bias<br>low risk of bias | low risk of bias<br>probably high risk of bias<br>low risk of bias<br>high risk of bias<br>high risk of bias<br>high risk of bias<br>low risk of bias | low risk of bias<br>low risk of bias<br>low risk of bias<br>probably low risk of bias<br>probably low risk of bias<br>probably high risk of bias<br>low risk of bias |                              |
| ribavirin, sofosbuvir-daclatasvir | standard care/placebo                   | 11010                                                                                                     | Kasgari                                                                       | low risk of bias                                                                                                                                             | probably high risk of bias                                                                                                                                              | low risk of bias                                                                                                                                  | high risk of bias                                                                                                                                     | probably low risk of bias                                                                                                                                            |                              |
| serine protease inhibitors        | standard care/placebo                   | 40853<br>70176                                                                                            | Gunst<br>Zhuravel                                                             | low risk of bias<br>low risk of bias                                                                                                                         | low risk of bias<br>probably high risk of bias                                                                                                                          | low risk of bias                                                                                                                                  | low risk of bias<br>high risk of bias                                                                                                                 | low risk of bias<br>probably low risk of bias                                                                                                                        |                              |
| statins                           | standard care/placebo                   | Ghati                                                                                                     | Ghati                                                                         | probably high risk of bias                                                                                                                                   | probably high risk of bias                                                                                                                                              | low risk of bias                                                                                                                                  | high risk of bias                                                                                                                                     | probably low risk of bias                                                                                                                                            |                              |
| sulodexide                        | standard care/placebo                   |                                                                                                           |                                                                               |                                                                                                                                                              |                                                                                                                                                                         |                                                                                                                                                   |                                                                                                                                                       |                                                                                                                                                                      |                              |

|                            |                       |              |                |                            |                            |                            |                           |                           |
|----------------------------|-----------------------|--------------|----------------|----------------------------|----------------------------|----------------------------|---------------------------|---------------------------|
|                            |                       | 21816, 34575 | Gonzalez-Ochoa | probably low risk of bias  | low risk of bias           | high risk of bias          | low risk of bias          | probably low risk of bias |
| triazavirin                | standard care/placebo | 12679        | Wu             | high risk of bias          | probably high risk of bias | low risk of bias           | low risk of bias          | probably low risk of bias |
| tyrosine kinase inhibitors | standard care/placebo | 49287        | Aman           | low risk of bias           | low risk of bias           | low risk of bias           | low risk of bias          | low risk of bias          |
|                            |                       | 60872        | Strich         | probably low risk of bias  | low risk of bias           | low risk of bias           | low risk of bias          | low risk of bias          |
| umifenovir                 | standard care/placebo | 1243, 234    | Li             | low risk of bias           | probably high risk of bias | low risk of bias           | probably low risk of bias | probably low risk of bias |
|                            |                       | 35511        | Khodashahi     | probably low risk of bias  | probably high risk of bias | low risk of bias           | high risk of bias         | probably low risk of bias |
|                            |                       | 52841        | Darazam_3      | low risk of bias           | probably high risk of bias | low risk of bias           | high risk of bias         | probably low risk of bias |
| vilobelimab                | standard care/placebo | 14404, 9802  | Vlaar          | probably high risk of bias | probably high risk of bias | low risk of bias           | high risk of bias         | probably low risk of bias |
| vitamin C                  | standard care/placebo | 26123, Zhang | Zhang_1        | low risk of bias           | low risk of bias           | low risk of bias           | low risk of bias          | probably low risk of bias |
|                            |                       | 31458        | Thomas         | low risk of bias           | probably high risk of bias | probably high risk of bias | high risk of bias         | low risk of bias          |
| vitamin C                  | vitamin C, zinc       | 31458        | Thomas         | low risk of bias           | probably high risk of bias | probably high risk of bias | high risk of bias         | low risk of bias          |
| vitamin C                  | zinc                  | 31458        | Thomas         | low risk of bias           | probably high risk of bias | probably high risk of bias | high risk of bias         | low risk of bias          |
| vitamin C, zinc            | standard care/placebo | 31458        | Thomas         | low risk of bias           | probably high risk of bias | probably high risk of bias | high risk of bias         | low risk of bias          |
| vitamin C, zinc            | zinc                  | 31458        | Thomas         | low risk of bias           | probably high risk of bias | probably high risk of bias | high risk of bias         | low risk of bias          |
| vitamin D                  | standard care/placebo | 11879        | Castillo       | probably high risk of bias | probably high risk of bias | low risk of bias           | high risk of bias         | low risk of bias          |
|                            |                       | 18926        | Ratogi         | probably high risk of bias | probably high risk of bias | low risk of bias           | probably low risk of bias | low risk of bias          |
|                            |                       | 44830        | Lakkireddy     | high risk of bias          | probably high risk of bias | low risk of bias           | high risk of bias         | probably low risk of bias |
| xiyanping                  | standard care/placebo | 43229        | Zhang_3        | low risk of bias           | probably high risk of bias | low risk of bias           | low risk of bias          | probably low risk of bias |
| zinc                       | standard care/placebo | 31458        | Thomas         | low risk of bias           | probably high risk of bias | probably high risk of bias | high risk of bias         | low risk of bias          |

| Viral Clearance                        |                                   |                                 |               |                            |                              |                      |                        |                           |       |
|----------------------------------------|-----------------------------------|---------------------------------|---------------|----------------------------|------------------------------|----------------------|------------------------|---------------------------|-------|
| Treatment 1                            | Treatment 2                       | Trial                           | First author  | Randomization              | Deviations from the intended | Missing outcome data | Measurement of outcome | Selection of the reported | Other |
| 2-deoxy-D-glucose                      | standard care/placebo             | 66751a                          | Narayan Bhatt | probably high risk of bias | high risk of bias            | low risk of bias     | low risk of bias       | low risk of bias          |       |
|                                        |                                   | 66751b                          | Narayan Bhatt | probably high risk of bias | high risk of bias            | low risk of bias     | low risk of bias       | low risk of bias          |       |
| 5-alpha reductase inhibitor            | standard care/placebo             | 19047, 33978, Cadegiani, Cadegi | Cadegiani_1   | probably low risk of bias  | low risk of bias             | high risk of bias    | low risk of bias       | probably low risk of bias |       |
| HIV reverse transcriptase inhibitor    | standard care/placebo             | 8469                            | Ren           | probably high risk of bias | probably high risk of bias   | low risk of bias     | low risk of bias       | low risk of bias          |       |
| NSAIDs                                 | paracetamol                       | Ravichandran                    | Ravichandran  | probably high risk of bias | probably high risk of bias   | low risk of bias     | low risk of bias       | probably low risk of bias |       |
| andrographolide                        | standard care/placebo             | Wanaratna                       | Wanaratna     | low risk of bias           | low risk of bias             | low risk of bias     | low risk of bias       | probably low risk of bias |       |
| is, curcuminoids, piperine, resveratro | standard care/placebo             | 67818                           | Majeed        | probably low risk of bias  | low risk of bias             | low risk of bias     | low risk of bias       | probably low risk of bias |       |
| antihypertensive                       | ravidasvir, sofosbuvir            | 57630                           | Abbass        | low risk of bias           | probably high risk of bias   | low risk of bias     | low risk of bias       | low risk of bias          |       |
| antihypertensive                       | standard care/placebo             | 51681                           | El-Bendary    | probably high risk of bias | probably high risk of bias   | high risk of bias    | low risk of bias       | probably low risk of bias |       |
|                                        |                                   | 57630                           | Abbass        | low risk of bias           | probably high risk of bias   | low risk of bias     | low risk of bias       | low risk of bias          |       |
| azelastine                             | standard care/placebo             | Klussmann                       | Klussmann     | low risk of bias           | low risk of bias             | low risk of bias     | low risk of bias       | probably low risk of bias |       |
| azithromycin                           | azithromycin, hydroxychloroquine  | 31471                           | Purwati       | probably low risk of bias  | low risk of bias             | low risk of bias     | low risk of bias       | probably low risk of bias |       |
| azithromycin                           | azithromycin, lopinavir-ritonavir | 31471                           | Purwati       | probably low risk of bias  | low risk of bias             | low risk of bias     | low risk of bias       | probably low risk of bias |       |
| azithromycin                           | doxycycline, lopinavir-ritonavir  | 31471                           | Purwati       | probably low risk of bias  | low risk of bias             | low risk of bias     | low risk of bias       | probably low risk of bias |       |
| azithromycin                           | lincomycin                        | 6669                            | Guyenmez      | probably high risk of bias | probably high risk of bias   | low risk of bias     | low risk of bias       | probably low risk of bias |       |
| azithromycin, hydroxychloroquine       | azithromycin, lopinavir-ritonavir | 31471                           | Purwati       | probably low risk of bias  | low risk of bias             | low risk of bias     | low risk of bias       | probably low risk of bias |       |
| azithromycin, hydroxychloroquine       | doxycycline                       | Sobngwi                         | Sobngwi       | low risk of bias           | probably high risk of bias   | low risk of bias     | low risk of bias       | probably low risk of bias |       |
| azithromycin, hydroxychloroquine       | doxycycline, lopinavir-ritonavir  | 31471                           | Purwati       | probably low risk of bias  | low risk of bias             | low risk of bias     | low risk of bias       | probably low risk of bias |       |
| azithromycin, hydroxychloroquine       | hydroxychloroquine                | 20005                           | Omriani       | low risk of bias           | low risk of bias             | low risk of bias     | low risk of bias       | low risk of bias          |       |
|                                        |                                   | 33489, Johnston                 | Johnston      | probably low risk of bias  | low risk of bias             | low risk of bias     | low risk of bias       | low risk of bias          |       |
| azithromycin, hydroxychloroquine       | standard care/placebo             | 20005                           | Omriani       | low risk of bias           | low risk of bias             | low risk of bias     | low risk of bias       | low risk of bias          |       |
|                                        |                                   | 33489, Johnston                 | Johnston      | probably low risk of bias  | low risk of bias             | low risk of bias     | low risk of bias       | low risk of bias          |       |
|                                        |                                   | 60017                           | Rodrigues     | low risk of bias           | low risk of bias             | low risk of bias     | low risk of bias       | probably low risk of bias |       |
|                                        |                                   | Babalola_2                      | Babalola_2    | probably high risk of bias | probably high risk of bias   | low risk of bias     | low risk of bias       | low risk of bias          |       |
| azithromycin, lopinavir-ritonavir      | doxycycline, lopinavir-ritonavir  | 31471                           | Purwati       | probably low risk of bias  | low risk of bias             | low risk of bias     | low risk of bias       | probably low risk of bias |       |
| baloxavir marboxil                     | favipiravir                       | 2637, Lou, Lou (1)              | Lou           | low risk of bias           | probably high risk of bias   | low risk of bias     | low risk of bias       | low risk of bias          |       |

|                                      |                                      |                    |                 |                            |                            |                            |                  |                           |
|--------------------------------------|--------------------------------------|--------------------|-----------------|----------------------------|----------------------------|----------------------------|------------------|---------------------------|
| baloxavir marboxil                   | standard care/placebo                | 2637, Lou, Lou (1) | Lou             | low risk of bias           | probably high risk of bias | low risk of bias           | low risk of bias | low risk of bias          |
| bromhexine hydrochloride             | standard care/placebo                | 35697              | Tolouian        | probably high risk of bias | probably high risk of bias | probably low risk of bias  | low risk of bias | probably low risk of bias |
| corticosteroids (systemic)           | standard care/placebo                | 10699              | Jeronimo        | low risk of bias           | low risk of bias           | high risk of bias          | low risk of bias | low risk of bias          |
|                                      |                                      | 27641              | Tang_2          | probably low risk of bias  | probably high risk of bias | low risk of bias           | low risk of bias | probably low risk of bias |
| doxycycline, ivermectin              | ivermectin                           | Ahmed              | Ahmed           | probably low risk of bias  | low risk of bias           | low risk of bias           | low risk of bias | probably low risk of bias |
| doxycycline, ivermectin              | standard care/placebo                | Ahmed              | Ahmed           | probably low risk of bias  | low risk of bias           | low risk of bias           | low risk of bias | probably low risk of bias |
| favipiravir                          | standard care/placebo                | 2637, Lou, Lou (1) | Lou             | low risk of bias           | probably high risk of bias | low risk of bias           | low risk of bias | low risk of bias          |
|                                      |                                      | 10147, 10287, 997  | Ivashchenko     | probably high risk of bias | high risk of bias          | low risk of bias           | low risk of bias | low risk of bias          |
|                                      |                                      | 32588              | Ruzhentsova     | probably high risk of bias | probably high risk of bias | low risk of bias           | low risk of bias | low risk of bias          |
|                                      |                                      | 24988, Udwardia    | Udwadia         | probably high risk of bias | probably high risk of bias | low risk of bias           | low risk of bias | low risk of bias          |
|                                      |                                      | 32586              | Balykova_2      | low risk of bias           | probably high risk of bias | low risk of bias           | low risk of bias | low risk of bias          |
|                                      |                                      | 27462              | Balykova_1      | probably high risk of bias | high risk of bias          | low risk of bias           | low risk of bias | probably low risk of bias |
| favipravir                           | standard care/placebo                | 40875              | Zhao_2          | low risk of bias           | probably high risk of bias | low risk of bias           | low risk of bias | low risk of bias          |
| fluvoxamine                          | standard care/placebo                | 70784, Reis_2      | Reis_2          | low risk of bias           | low risk of bias           | high risk of bias          | low risk of bias | low risk of bias          |
| full-dose anticoagulation            | intermediate-dose anticoagulation    | 67889              | Marcos          | low risk of bias           | probably high risk of bias | low risk of bias           | low risk of bias | probably low risk of bias |
| hydroxychloroquine                   | interferon beta, lopinavir-ritonavir | 45662, Ader_1      | Ader_1          | low risk of bias           | probably high risk of bias | high risk of bias          | low risk of bias | low risk of bias          |
| hydroxychloroquine                   | lopinavir-ritonavir                  | pilot_4            | Huang_1         | probably high risk of bias | probably high risk of bias | low risk of bias           | low risk of bias | low risk of bias          |
|                                      |                                      | Reis_1             | Reis_1          | low risk of bias           | low risk of bias           | probably high risk of bias | low risk of bias | probably low risk of bias |
|                                      |                                      | 45662, Ader_1      | Ader_1          | low risk of bias           | probably high risk of bias | high risk of bias          | low risk of bias | low risk of bias          |
| hydroxychloroquine                   | standard care/placebo                | 3321, 776          | Tang_1          | low risk of bias           | probably high risk of bias | low risk of bias           | low risk of bias | low risk of bias          |
|                                      |                                      | C158               | Chen_3          | probably high risk of bias | probably high risk of bias | low risk of bias           | low risk of bias | low risk of bias          |
|                                      |                                      | 6987               | Chen_4          | probably high risk of bias | probably high risk of bias | high risk of bias          | low risk of bias | low risk of bias          |
|                                      |                                      | 13936              | Ulrich          | probably low risk of bias  | low risk of bias           | high risk of bias          | low risk of bias | low risk of bias          |
|                                      |                                      | 16085, 38308       | Dubée           | low risk of bias           | low risk of bias           | high risk of bias          | low risk of bias | low risk of bias          |
|                                      |                                      | 20005              | Omran           | low risk of bias           | low risk of bias           | low risk of bias           | low risk of bias | low risk of bias          |
|                                      |                                      | Reis_1             | Reis_1          | low risk of bias           | low risk of bias           | probably high risk of bias | low risk of bias | probably low risk of bias |
|                                      |                                      | 33489, Johnston    | Johnston        | probably low risk of bias  | low risk of bias           | low risk of bias           | low risk of bias | low risk of bias          |
|                                      |                                      | 45662, Ader_1      | Ader_1          | low risk of bias           | probably high risk of bias | high risk of bias          | low risk of bias | low risk of bias          |
|                                      |                                      | 33028              | Amaravadi       | low risk of bias           | low risk of bias           | low risk of bias           | low risk of bias | probably low risk of bias |
|                                      |                                      | Byakika-Kibwika    | Byakika-Kibwika | low risk of bias           | probably high risk of bias | low risk of bias           | low risk of bias | low risk of bias          |
| interferon alpha                     | combinant super combinant interferon | 32737, 7, 9574     | Li_2            | probably high risk of bias | probably high risk of bias | low risk of bias           | low risk of bias | low risk of bias          |
| interferon alpha                     | standard care/placebo                | 35022              | Pandit          | probably high risk of bias | probably high risk of bias | low risk of bias           | low risk of bias | low risk of bias          |
|                                      |                                      | 59366, 60209       | Bhushan         | probably high risk of bias | probably high risk of bias | low risk of bias           | low risk of bias | low risk of bias          |
| interferon beta, lopinavir-ritonavir | lopinavir-ritonavir                  | 45662, Ader_1      | Ader_1          | low risk of bias           | probably high risk of bias | high risk of bias          | low risk of bias | low risk of bias          |
| interferon beta, lopinavir-ritonavir | standard care/placebo                | 45662, Ader_1      | Ader_1          | low risk of bias           | probably high risk of bias | high risk of bias          | low risk of bias | low risk of bias          |

|                                    |                                |                                                                              |                                                                      |                                                                                                                                                                                          |                                                                                                                                                                                            |                                                                                                                                                                        |                                                                                                                                                              |                                                                                                                                                                                |
|------------------------------------|--------------------------------|------------------------------------------------------------------------------|----------------------------------------------------------------------|------------------------------------------------------------------------------------------------------------------------------------------------------------------------------------------|--------------------------------------------------------------------------------------------------------------------------------------------------------------------------------------------|------------------------------------------------------------------------------------------------------------------------------------------------------------------------|--------------------------------------------------------------------------------------------------------------------------------------------------------------|--------------------------------------------------------------------------------------------------------------------------------------------------------------------------------|
| interferon gamma                   | standard care/placebo          | 9880                                                                         | Esquivel-Moyne                                                       | probably high risk of bias                                                                                                                                                               | probably high risk of bias                                                                                                                                                                 | high risk of bias                                                                                                                                                      | low risk of bias                                                                                                                                             | probably low risk of bias                                                                                                                                                      |
| interferon kappa, trefoil factor 2 | standard care/placebo          | 13797                                                                        | Fu                                                                   | probably high risk of bias                                                                                                                                                               | probably high risk of bias                                                                                                                                                                 | low risk of bias                                                                                                                                                       | low risk of bias                                                                                                                                             | probably low risk of bias                                                                                                                                                      |
| intranasal corticosteroids         | standard care/placebo          | 57833                                                                        | Song                                                                 | probably high risk of bias                                                                                                                                                               | probably high risk of bias                                                                                                                                                                 | low risk of bias                                                                                                                                                       | low risk of bias                                                                                                                                             | low risk of bias                                                                                                                                                               |
| ivermectin                         | lopinavir-ritonavir            | 25394, Babalola                                                              | Babalola                                                             | low risk of bias                                                                                                                                                                         | low risk of bias                                                                                                                                                                           | low risk of bias                                                                                                                                                       | low risk of bias                                                                                                                                             | probably low risk of bias                                                                                                                                                      |
| ivermectin                         | standard care/placebo          | Ahmed 27334, Chaccour 53436, Ravikirti Bukhari Mohan Schwartz 35667 Kishoria | Ahmed Chaccour Ravikirti Bukhari Mohan Schwartz Pott-Junior Kishoria | probably low risk of bias<br>low risk of bias<br>low risk of bias<br>probably high risk of bias<br>low risk of bias<br>probably low risk of bias<br>low risk of bias<br>low risk of bias | low risk of bias<br>low risk of bias<br>low risk of bias<br>probably high risk of bias<br>low risk of bias<br>low risk of bias<br>probably high risk of bias<br>probably high risk of bias | low risk of bias<br>low risk of bias<br>low risk of bias<br>probably high risk of bias<br>low risk of bias<br>low risk of bias<br>low risk of bias<br>low risk of bias | low risk of bias<br>low risk of bias | probably low risk of bias<br>low risk of bias<br>probably low risk of bias |
| leflunomide                        | standard care/placebo          | 8784 13540                                                                   | Hu Wang_5                                                            | probably high risk of bias<br>probably high risk of bias                                                                                                                                 | probably high risk of bias<br>probably high risk of bias                                                                                                                                   | low risk of bias<br>low risk of bias                                                                                                                                   | low risk of bias<br>low risk of bias                                                                                                                         | probably low risk of bias<br>low risk of bias                                                                                                                                  |
| lopinavir-ritonavir                | lopinavir-ritonavir, nomaferon | 10121, 2338                                                                  | Zheng                                                                | probably high risk of bias                                                                                                                                                               | probably high risk of bias                                                                                                                                                                 | low risk of bias                                                                                                                                                       | low risk of bias                                                                                                                                             | low risk of bias                                                                                                                                                               |
| lopinavir-ritonavir                | lopinavir-ritonavir, ribavirin | 10067, 2615                                                                  | Huang_2                                                              | probably high risk of bias                                                                                                                                                               | probably high risk of bias                                                                                                                                                                 | low risk of bias                                                                                                                                                       | low risk of bias                                                                                                                                             | low risk of bias                                                                                                                                                               |
| lopinavir-ritonavir                | nomaferon                      | 10121, 2338                                                                  | Zheng                                                                | probably high risk of bias                                                                                                                                                               | probably high risk of bias                                                                                                                                                                 | low risk of bias                                                                                                                                                       | low risk of bias                                                                                                                                             | low risk of bias                                                                                                                                                               |
| lopinavir-ritonavir                | ribavirin                      | 10067, 2615                                                                  | Huang_2                                                              | probably high risk of bias                                                                                                                                                               | probably high risk of bias                                                                                                                                                                 | low risk of bias                                                                                                                                                       | low risk of bias                                                                                                                                             | low risk of bias                                                                                                                                                               |
| lopinavir-ritonavir                | standard care/placebo          | 330 1243, 234 Reis_1 45662, Ader_1                                           | Cao_1 Li Reis_1 Ader_1                                               | low risk of bias<br>low risk of bias<br>low risk of bias<br>low risk of bias                                                                                                             | probably high risk of bias<br>probably high risk of bias<br>low risk of bias<br>probably high risk of bias                                                                                 | low risk of bias<br>low risk of bias<br>probably high risk of bias<br>high risk of bias                                                                                | low risk of bias<br>low risk of bias<br>low risk of bias<br>low risk of bias                                                                                 | probably low risk of bias<br>low risk of bias<br>probably low risk of bias<br>low risk of bias                                                                                 |
| lopinavir-ritonavir                | umifenovir                     | 1243, 234                                                                    | Li                                                                   | low risk of bias                                                                                                                                                                         | probably high risk of bias                                                                                                                                                                 | low risk of bias                                                                                                                                                       | low risk of bias                                                                                                                                             | low risk of bias                                                                                                                                                               |
| lopinavir-ritonavir, nomaferon     | nomaferon                      | 10121, 2338                                                                  | Zheng                                                                | probably high risk of bias                                                                                                                                                               | probably high risk of bias                                                                                                                                                                 | low risk of bias                                                                                                                                                       | low risk of bias                                                                                                                                             | low risk of bias                                                                                                                                                               |
| lopinavir-ritonavir, ribavirin     | ribavirin                      | 10067, 2615                                                                  | Huang_2                                                              | probably high risk of bias                                                                                                                                                               | probably high risk of bias                                                                                                                                                                 | low risk of bias                                                                                                                                                       | low risk of bias                                                                                                                                             | low risk of bias                                                                                                                                                               |
| metisoprinol                       | standard care/placebo          | Migled                                                                       | Migled                                                               | probably high risk of bias                                                                                                                                                               | probably high risk of bias                                                                                                                                                                 | low risk of bias                                                                                                                                                       | low risk of bias                                                                                                                                             | probably low risk of bias                                                                                                                                                      |
| molnupiravir                       | standard care/placebo          | 46473, Fischer CR216-21 CTRI/2021/06/0339 HCR/III/MOLCOV/04/20               | Fischer Vyas Krishnan Kumar_2                                        | low risk of bias<br>low risk of bias<br>low risk of bias<br>probably high risk of bias                                                                                                   | low risk of bias<br>probably high risk of bias<br>probably high risk of bias<br>probably high risk of bias                                                                                 | low risk of bias<br>low risk of bias<br>high risk of bias<br>low risk of bias                                                                                          | low risk of bias<br>low risk of bias<br>low risk of bias<br>low risk of bias                                                                                 | low risk of bias<br>low risk of bias<br>low risk of bias<br>probably low risk of bias                                                                                          |
| nasal chloroquine                  | standard care/placebo          | 27485                                                                        | Thakar                                                               | low risk of bias                                                                                                                                                                         | probably high risk of bias                                                                                                                                                                 | low risk of bias                                                                                                                                                       | low risk of bias                                                                                                                                             | probably high risk of bias                                                                                                                                                     |
| nitazoxanide                       | standard care/placebo          |                                                                              |                                                                      |                                                                                                                                                                                          |                                                                                                                                                                                            |                                                                                                                                                                        |                                                                                                                                                              |                                                                                                                                                                                |

|                                     |                       |                           |                    |                                      |                                                |                                       |                                      |                                               |
|-------------------------------------|-----------------------|---------------------------|--------------------|--------------------------------------|------------------------------------------------|---------------------------------------|--------------------------------------|-----------------------------------------------|
|                                     |                       | 16339, 24799<br>Silva     | Rocco<br>Silva     | low risk of bias<br>low risk of bias | low risk of bias<br>probably high risk of bias | high risk of bias<br>low risk of bias | low risk of bias<br>low risk of bias | probably low risk of bias<br>low risk of bias |
| nitric oxide                        | standard care/placebo | Moni                      | Moni               | low risk of bias                     | probably high risk of bias                     | high risk of bias                     | low risk of bias                     | low risk of bias                              |
| peginterferon lambda                | standard care/placebo | 18418, 28233              | Feld               | low risk of bias                     | low risk of bias                               | low risk of bias                      | low risk of bias                     | low risk of bias                              |
| prolectin-M                         | standard care/placebo | Sigamani, Sigamani        | Sigamani           | low risk of bias                     | probably high risk of bias                     | low risk of bias                      | low risk of bias                     | probably low risk of bias                     |
| proxalutamide                       | standard care/placebo | 33610                     | Cadegiani_3        | high risk of bias                    | low risk of bias                               | low risk of bias                      | low risk of bias                     | probably low risk of bias                     |
| quercetin                           | standard care/placebo | 51397                     | Di Pierro_2        | probably high risk of bias           | probably high risk of bias                     | low risk of bias                      | low risk of bias                     | low risk of bias                              |
| ravidasvir, sofosbuvir              | standard care/placebo | 57630                     | Abbass             | low risk of bias                     | probably high risk of bias                     | low risk of bias                      | low risk of bias                     | low risk of bias                              |
| nt human granulocyte colony-stimula | standard care/placebo | 12705                     | Cheng              | low risk of bias                     | probably high risk of bias                     | high risk of bias                     | low risk of bias                     | low risk of bias                              |
| remdesivir                          | standard care/placebo | 2408                      | Wang_1             | low risk of bias                     | low risk of bias                               | low risk of bias                      | low risk of bias                     | low risk of bias                              |
| serine protease inhibitors          | standard care/placebo | 70176                     | Zhuravel           | low risk of bias                     | probably high risk of bias                     | low risk of bias                      | low risk of bias                     | probably low risk of bias                     |
| triazavirin                         | standard care/placebo | 12679                     | Wu                 | high risk of bias                    | probably high risk of bias                     | low risk of bias                      | low risk of bias                     | probably low risk of bias                     |
| umifenovir                          | standard care/placebo | 1243, 234<br>Ramachandran | Li<br>Ramachandran | low risk of bias<br>low risk of bias | probably high risk of bias<br>low risk of bias | low risk of bias<br>low risk of bias  | low risk of bias<br>low risk of bias | low risk of bias<br>high risk of bias         |

## Venous Thromboembolism

| Treatment 1                  | Treatment 2                       | Trial                                                                                                                       | First author                                                  | Randomization                                                                                                        | Deviations from the intended                                                                                                                                           | Missing outcome data                                                                                                 | Measurement of outcome                                                                                                 | Selection of the reported                                                                                                              | Other |
|------------------------------|-----------------------------------|-----------------------------------------------------------------------------------------------------------------------------|---------------------------------------------------------------|----------------------------------------------------------------------------------------------------------------------|------------------------------------------------------------------------------------------------------------------------------------------------------------------------|----------------------------------------------------------------------------------------------------------------------|------------------------------------------------------------------------------------------------------------------------|----------------------------------------------------------------------------------------------------------------------------------------|-------|
| Intermediate-dose enoxaparin | standard care/placebo             | 52393, Perepu                                                                                                               | Perepu                                                        | probably high risk of bias                                                                                           | probably high risk of bias                                                                                                                                             | low risk of bias                                                                                                     | high risk of bias                                                                                                      | low risk of bias                                                                                                                       |       |
| aspirin                      | full-dose anticoagulation         | 67646                                                                                                                       | Connors                                                       | low risk of bias                                                                                                     | low risk of bias                                                                                                                                                       | low risk of bias                                                                                                     | low risk of bias                                                                                                       | low risk of bias                                                                                                                       |       |
| aspirin                      | standard care/placebo             | 67646                                                                                                                       | Connors                                                       | low risk of bias                                                                                                     | low risk of bias                                                                                                                                                       | low risk of bias                                                                                                     | low risk of bias                                                                                                       | low risk of bias                                                                                                                       |       |
| full-dose anticoagulant      | intermediate-dose anticoagulation | Spyropoulos<br>67889                                                                                                        | Spyropoulos<br>Marcos                                         | probably low risk of bias<br>low risk of bias                                                                        | low risk of bias<br>probably high risk of bias                                                                                                                         | low risk of bias<br>low risk of bias                                                                                 | low risk of bias<br>high risk of bias                                                                                  | low risk of bias<br>probably low risk of bias                                                                                          |       |
| full-dose anticoagulation    | standard care/placebo             | 13836<br>34844, ATTACC/ACTIV-4a/RAP, ACTIV-4a, and ATTACC<br>35895, Bikdeli<br>56911, Lawler<br>Sholzberg<br>67646<br>47030 | Lemos<br>Bikdeli<br>Lawler<br>Sholzberg<br>Connors<br>Lopes_3 | low risk of bias<br>low risk of bias | probably high risk of bias<br>probably high risk of bias<br>probably high risk of bias<br>probably high risk of bias<br>low risk of bias<br>probably high risk of bias | low risk of bias<br>low risk of bias | high risk of bias<br>low risk of bias<br>low risk of bias<br>high risk of bias<br>low risk of bias<br>low risk of bias | probably low risk of bias<br>low risk of bias<br>probably low risk of bias<br>low risk of bias<br>low risk of bias<br>low risk of bias |       |
| serine protease inhibitors   | standard care/placebo             | 70176                                                                                                                       | Zhuravel                                                      | low risk of bias                                                                                                     | probably high risk of bias                                                                                                                                             | low risk of bias                                                                                                     | high risk of bias                                                                                                      | probably low risk of bias                                                                                                              |       |
| sulodexide                   | standard care/placebo             | 21816, 34575                                                                                                                | Gonzalez-Ochoa                                                | probably low risk of bias                                                                                            | low risk of bias                                                                                                                                                       | low risk of bias                                                                                                     | low risk of bias                                                                                                       | low risk of bias                                                                                                                       |       |

| Clinically Important Bleeding         |                                   |                                                  |                |                            |                              |                      |                        |                           |       |
|---------------------------------------|-----------------------------------|--------------------------------------------------|----------------|----------------------------|------------------------------|----------------------|------------------------|---------------------------|-------|
| Treatment 1                           | Treatment 2                       | Trial                                            | First author   | Randomization              | Deviations from the intended | Missing outcome data | Measurement of outcome | Selection of the reported | Other |
| Intermediate-dose anticoagulant       | standard care/placebo             | 52393, Perepu                                    | Perepu         | probably high risk of bias | probably high risk of bias   | low risk of bias     | high risk of bias      | low risk of bias          |       |
| aspirin                               | full-dose anticoagulation         | 67646                                            | Connors        | low risk of bias           | low risk of bias             | low risk of bias     | low risk of bias       | low risk of bias          |       |
| aspirin                               | standard care/placebo             | 67646                                            | Connors        | low risk of bias           | low risk of bias             | low risk of bias     | low risk of bias       | low risk of bias          |       |
| full-dose anticoagulation             | intermediate-dose anticoagulation | 65782                                            | Oliynyk        | probably high risk of bias | probably high risk of bias   | low risk of bias     | high risk of bias      | probably low risk of bias |       |
|                                       |                                   | 67889                                            | Marcos         | low risk of bias           | probably high risk of bias   | low risk of bias     | low risk of bias       | probably low risk of bias |       |
|                                       |                                   | Spyropoulos                                      | Spyropoulos    | probably low risk of bias  | low risk of bias             | low risk of bias     | low risk of bias       | low risk of bias          |       |
| full-dose anticoagulation             | standard care/placebo             | 13836                                            | Lemos          | low risk of bias           | probably high risk of bias   | low risk of bias     | high risk of bias      | probably low risk of bias |       |
|                                       |                                   | 34844, ATTACC/ACTIV-4a/RAP, ACTIV-4a, and ATTACC |                | low risk of bias           | probably high risk of bias   | low risk of bias     | low risk of bias       | low risk of bias          |       |
|                                       |                                   | 35895, Bikdeli                                   | Bikdeli        | low risk of bias           | probably high risk of bias   | low risk of bias     | low risk of bias       | probably low risk of bias |       |
|                                       |                                   | 56911, Lawler                                    | Lawler         | low risk of bias           | probably high risk of bias   | low risk of bias     | low risk of bias       | low risk of bias          |       |
|                                       |                                   | Sholzberg                                        | Sholzberg      | low risk of bias           | probably high risk of bias   | low risk of bias     | high risk of bias      | low risk of bias          |       |
|                                       |                                   | 64008                                            | Ananworanich   | probably low risk of bias  | low risk of bias             | low risk of bias     | low risk of bias       | low risk of bias          |       |
|                                       |                                   | 67646                                            | Connors        | low risk of bias           | low risk of bias             | low risk of bias     | low risk of bias       | low risk of bias          |       |
|                                       |                                   | 47030                                            | Lopes_3        | low risk of bias           | probably high risk of bias   | low risk of bias     | low risk of bias       | low risk of bias          |       |
| ull-dose anticoagulation, thrombolysi | standard care/placebo             | 65552_P1                                         | Barrett_P1     | low risk of bias           | probably high risk of bias   | low risk of bias     | high risk of bias      | low risk of bias          |       |
|                                       |                                   | 65552_P2                                         | Barrett_P2     | low risk of bias           | probably high risk of bias   | low risk of bias     | high risk of bias      | low risk of bias          |       |
| sulodexide                            | standard care/placebo             | 21816, 34575                                     | Gonzalez-Ochoa | probably low risk of bias  | low risk of bias             | high risk of bias    | low risk of bias       | low risk of bias          |       |



|                                       |                                               |                                                                              |                                                      |                                                                                                                               |                                                                                                                        |                                                                                                  |                                                                                                  |                                                                                                                              |                                                                                                  |
|---------------------------------------|-----------------------------------------------|------------------------------------------------------------------------------|------------------------------------------------------|-------------------------------------------------------------------------------------------------------------------------------|------------------------------------------------------------------------------------------------------------------------|--------------------------------------------------------------------------------------------------|--------------------------------------------------------------------------------------------------|------------------------------------------------------------------------------------------------------------------------------|--------------------------------------------------------------------------------------------------|
|                                       |                                               | 62263, Marconi, Marci<br>48879<br>RUXCOVID<br>Ely, WHO_COV-BARRIER_Addendum, | Marconi<br>Guimarães<br>RUXCOVID<br>Ely              | low risk of bias                                                                                                              | low risk of bias                                                                                                       | low risk of bias                                                                                 | low risk of bias                                                                                 | low risk of bias                                                                                                             | low risk of bias                                                                                 |
|                                       |                                               |                                                                              |                                                      | low risk of bias                                                                                                              | low risk of bias                                                                                                       | low risk of bias                                                                                 | low risk of bias                                                                                 | low risk of bias                                                                                                             | low risk of bias                                                                                 |
|                                       |                                               |                                                                              |                                                      | low risk of bias                                                                                                              | low risk of bias                                                                                                       | low risk of bias                                                                                 | low risk of bias                                                                                 | low risk of bias                                                                                                             | low risk of bias                                                                                 |
|                                       |                                               |                                                                              |                                                      | low risk of bias                                                                                                              | low risk of bias                                                                                                       | low risk of bias                                                                                 | low risk of bias                                                                                 | low risk of bias                                                                                                             | low risk of bias                                                                                 |
| L-arginine                            | standard care/placebo                         | 64005                                                                        | Fiorentino                                           | low risk of bias                                                                                                              | low risk of bias                                                                                                       | low risk of bias                                                                                 | low risk of bias                                                                                 | low risk of bias                                                                                                             | low risk of bias                                                                                 |
| NSAID, azithromycin                   | NSAID, azithromycin, corticosteroid           | 64198                                                                        | Ghanei                                               | low risk of bias                                                                                                              | probably high risk of bias                                                                                             | low risk of bias                                                                                 | low risk of bias                                                                                 | low risk of bias                                                                                                             | low risk of bias                                                                                 |
| NSAID, azithromycin                   | lopinavir-ritonavir                           | 64198                                                                        | Ghanei                                               | low risk of bias                                                                                                              | probably high risk of bias                                                                                             | low risk of bias                                                                                 | low risk of bias                                                                                 | low risk of bias                                                                                                             | low risk of bias                                                                                 |
| NSAID, azithromycin, corticosteroid   | lopinavir-ritonavir                           | 64198                                                                        | Ghanei                                               | low risk of bias                                                                                                              | probably high risk of bias                                                                                             | low risk of bias                                                                                 | low risk of bias                                                                                 | low risk of bias                                                                                                             | low risk of bias                                                                                 |
| TNF inhibitors                        | standard care/placebo                         | 52260                                                                        | Fakharian                                            | probably high risk of bias                                                                                                    | probably high risk of bias                                                                                             | low risk of bias                                                                                 | low risk of bias                                                                                 | low risk of bias                                                                                                             | low risk of bias                                                                                 |
| 5, curcuminoids, piperine, resveratro | standard care/placebo                         | 67818                                                                        | Majeed                                               | probably low risk of bias                                                                                                     | low risk of bias                                                                                                       | low risk of bias                                                                                 | low risk of bias                                                                                 | low risk of bias                                                                                                             | low risk of bias                                                                                 |
| antihypertensive                      | azithromycin, hydroxychloroquine, oseltamivir | 44111                                                                        | Elgohary                                             | low risk of bias                                                                                                              | probably high risk of bias                                                                                             | low risk of bias                                                                                 | low risk of bias                                                                                 | probably high risk of bias                                                                                                   | low risk of bias                                                                                 |
| antihypertensive                      | lopinavir-ritonavir                           | Yadollahzadeh                                                                | Yadollahzadeh                                        | probably high risk of bias                                                                                                    | probably high risk of bias                                                                                             | low risk of bias                                                                                 | low risk of bias                                                                                 | low risk of bias                                                                                                             | probably high risk of bias                                                                       |
| antihypertensive                      | standard care/placebo                         | 11065<br>29517<br>Mobarak<br>45668<br>51681                                  | Sadeghi<br>Nourian<br>Mobarak<br>Sayad<br>El-Bendary | probably high risk of bias<br>low risk of bias<br>probably low risk of bias<br>low risk of bias<br>probably high risk of bias | high risk of bias<br>high risk of bias<br>low risk of bias<br>probably high risk of bias<br>probably high risk of bias | low risk of bias<br>low risk of bias<br>low risk of bias<br>low risk of bias<br>low risk of bias | low risk of bias<br>low risk of bias<br>low risk of bias<br>low risk of bias<br>low risk of bias | probably high risk of bias<br>low risk of bias<br>low risk of bias<br>probably low risk of bias<br>probably low risk of bias | low risk of bias<br>low risk of bias<br>low risk of bias<br>low risk of bias<br>low risk of bias |
| aspirin                               | aspirin, atorvastatin                         | Ghati                                                                        | Ghati                                                | probably high risk of bias                                                                                                    | probably high risk of bias                                                                                             | low risk of bias                                                                                 | low risk of bias                                                                                 | low risk of bias                                                                                                             | low risk of bias                                                                                 |
| aspirin                               | standard care/placebo                         | Ghati<br>Horby_7                                                             | Ghati<br>Horby_7                                     | probably high risk of bias<br>low risk of bias                                                                                | probably high risk of bias<br>probably high risk of bias                                                               | low risk of bias<br>low risk of bias                                                             | low risk of bias<br>low risk of bias                                                             | low risk of bias<br>low risk of bias                                                                                         | low risk of bias<br>low risk of bias                                                             |
| aspirin                               | statins                                       | Ghati                                                                        | Ghati                                                | probably high risk of bias                                                                                                    | probably high risk of bias                                                                                             | low risk of bias                                                                                 | low risk of bias                                                                                 | low risk of bias                                                                                                             | low risk of bias                                                                                 |
| aspirin, atorvastatin                 | standard care/placebo                         | Ghati                                                                        | Ghati                                                | probably high risk of bias                                                                                                    | probably high risk of bias                                                                                             | low risk of bias                                                                                 | low risk of bias                                                                                 | low risk of bias                                                                                                             | low risk of bias                                                                                 |
| aspirin, atorvastatin                 | statins                                       | Ghati                                                                        | Ghati                                                | probably high risk of bias                                                                                                    | probably high risk of bias                                                                                             | low risk of bias                                                                                 | low risk of bias                                                                                 | low risk of bias                                                                                                             | low risk of bias                                                                                 |
| atazanavir, dolutegravir, ritonavir   | lopinavir-ritonavir                           | 53056                                                                        | Kalantari                                            | probably high risk of bias                                                                                                    | high risk of bias                                                                                                      | low risk of bias                                                                                 | low risk of bias                                                                                 | probably low risk of bias                                                                                                    | probably low risk of bias                                                                        |
| azithromycin                          | standard care/placebo                         | 11639, 12378<br>12439<br>22569, 29803<br>40804                               | Sekhavi<br>Furtado<br>Horby_4<br>Hinks               | probably high risk of bias<br>low risk of bias<br>low risk of bias<br>low risk of bias                                        | probably high risk of bias<br>probably high risk of bias<br>probably high risk of bias<br>probably high risk of bias   | low risk of bias<br>low risk of bias<br>low risk of bias<br>low risk of bias                     | low risk of bias<br>low risk of bias<br>low risk of bias<br>low risk of bias                     | probably low risk of bias<br>low risk of bias<br>low risk of bias<br>low risk of bias                                        | low risk of bias<br>low risk of bias<br>low risk of bias<br>low risk of bias                     |
| azithromycin, hydroxychloroquine      | hydroxychloroquine                            | 22152, 9166<br>33489, Johnston                                               | Cavalcanti<br>Johnston                               | low risk of bias<br>probably low risk of bias                                                                                 | probably high risk of bias<br>low risk of bias                                                                         | low risk of bias<br>low risk of bias                                                             | low risk of bias<br>low risk of bias                                                             | low risk of bias<br>low risk of bias                                                                                         | low risk of bias<br>low risk of bias                                                             |
| azithromycin, hydroxychloroquine      | standard care/placebo                         | 22152, 9166                                                                  | Cavalcanti                                           | low risk of bias                                                                                                              | probably high risk of bias                                                                                             | low risk of bias                                                                                 | low risk of bias                                                                                 | low risk of bias                                                                                                             | low risk of bias                                                                                 |

|                                          |                                            |                                                                     |                                                                           |                                                                                                                                                   |                                                                                                                                                                        |                                                                                                                      |                                                                                                                      |                                                                                                                                        |                                                                                                                                |
|------------------------------------------|--------------------------------------------|---------------------------------------------------------------------|---------------------------------------------------------------------------|---------------------------------------------------------------------------------------------------------------------------------------------------|------------------------------------------------------------------------------------------------------------------------------------------------------------------------|----------------------------------------------------------------------------------------------------------------------|----------------------------------------------------------------------------------------------------------------------|----------------------------------------------------------------------------------------------------------------------------------------|--------------------------------------------------------------------------------------------------------------------------------|
|                                          |                                            | 33489, Johnston<br>48002                                            | Johnston<br>Sivapalan                                                     | probably low risk of bias<br>low risk of bias                                                                                                     | low risk of bias<br>low risk of bias                                                                                                                                   | low risk of bias<br>low risk of bias                                                                                 | low risk of bias<br>low risk of bias                                                                                 | low risk of bias<br>low risk of bias                                                                                                   | low risk of bias<br>probably low risk of bias                                                                                  |
| beta-glucans                             | standard care/placebo                      | 65044                                                               | Raghavan                                                                  | probably high risk of bias                                                                                                                        | probably high risk of bias                                                                                                                                             | low risk of bias                                                                                                     | low risk of bias                                                                                                     | probably low risk of bias                                                                                                              | low risk of bias                                                                                                               |
| bradykinin inhibitors                    | standard care/placebo                      | 10832                                                               | Mansour                                                                   | low risk of bias                                                                                                                                  | probably high risk of bias                                                                                                                                             | low risk of bias                                                                                                     | low risk of bias                                                                                                     | low risk of bias                                                                                                                       | probably low risk of bias                                                                                                      |
| bromhexine hydrochloride                 | standard care/placebo                      | 13888<br>35697                                                      | Ansarin<br>Tolouian                                                       | probably high risk of bias<br>probably high risk of bias                                                                                          | probably high risk of bias<br>probably high risk of bias                                                                                                               | low risk of bias<br>probably low risk of bias                                                                        | low risk of bias<br>low risk of bias                                                                                 | low risk of bias<br>probably low risk of bias                                                                                          | probably low risk of bias<br>probably low risk of bias                                                                         |
| colchicine                               | standard care/placebo                      | 7189<br>11<br>10500, xx<br>Horby_6<br>64351<br>64385                | Deftereos<br>Salehzadeh<br>Lopes_2<br>Horby_6<br>Dorward<br>Pascual-Figal | low risk of bias<br>probably high risk of bias<br>probably low risk of bias<br>low risk of bias<br>low risk of bias<br>low risk of bias           | probably high risk of bias<br>probably high risk of bias<br>low risk of bias<br>probably high risk of bias<br>probably high risk of bias<br>probably high risk of bias | low risk of bias<br>low risk of bias | low risk of bias<br>low risk of bias | probably low risk of bias<br>low risk of bias<br>probably low risk of bias<br>low risk of bias<br>low risk of bias<br>low risk of bias | low risk of bias<br>low risk of bias<br>low risk of bias<br>low risk of bias<br>low risk of bias<br>probably high risk of bias |
| lchicine, emtricitabine, tenofovir, stat | emtricitabine, tenofovir                   | Gaitan-Duarte                                                       | Gaitan-Duarte                                                             | low risk of bias                                                                                                                                  | probably high risk of bias                                                                                                                                             | low risk of bias                                                                                                     | low risk of bias                                                                                                     | probably low risk of bias                                                                                                              | probably low risk of bias                                                                                                      |
| lchicine, emtricitabine, tenofovir, stat | standard care/placebo                      | Gaitan-Duarte                                                       | Gaitan-Duarte                                                             | low risk of bias                                                                                                                                  | probably high risk of bias                                                                                                                                             | low risk of bias                                                                                                     | low risk of bias                                                                                                     | probably low risk of bias                                                                                                              | probably low risk of bias                                                                                                      |
| colchicine, statin                       | lchicine, emtricitabine, tenofovir, statin | Gaitan-Duarte                                                       | Gaitan-Duarte                                                             | low risk of bias                                                                                                                                  | probably high risk of bias                                                                                                                                             | low risk of bias                                                                                                     | low risk of bias                                                                                                     | probably low risk of bias                                                                                                              | probably low risk of bias                                                                                                      |
| colchicine, statin                       | emtricitabine, tenofovir                   | Gaitan-Duarte                                                       | Gaitan-Duarte                                                             | low risk of bias                                                                                                                                  | probably high risk of bias                                                                                                                                             | low risk of bias                                                                                                     | low risk of bias                                                                                                     | probably low risk of bias                                                                                                              | probably low risk of bias                                                                                                      |
| colchicine, statin                       | standard care/placebo                      | Gaitan-Duarte                                                       | Gaitan-Duarte                                                             | low risk of bias                                                                                                                                  | probably high risk of bias                                                                                                                                             | low risk of bias                                                                                                     | low risk of bias                                                                                                     | probably low risk of bias                                                                                                              | probably low risk of bias                                                                                                      |
| corticosteroids (systemic)               | standard care/placebo                      | 29672, 6743<br>33381, 7002, 861<br>10699<br>12146<br>31583<br>27642 | Corral-Gudino<br>Horby_1<br>Jeronimo<br>Angus<br>Jamaati<br>Tang_2        | low risk of bias<br>low risk of bias<br>low risk of bias<br>probably high risk of bias<br>probably high risk of bias<br>probably low risk of bias | probably high risk of bias<br>probably high risk of bias<br>low risk of bias<br>probably high risk of bias<br>probably high risk of bias<br>probably high risk of bias | low risk of bias<br>low risk of bias | low risk of bias<br>low risk of bias | low risk of bias<br>low risk of bias<br>probably low risk of bias<br>low risk of bias<br>low risk of bias<br>probably low risk of bias | low risk of bias<br>low risk of bias<br>low risk of bias<br>low risk of bias<br>low risk of bias<br>probably high risk of bias |
| corticosteroids (systemic), tacrolimus   | standard care/placebo                      | 51435                                                               | Solanich                                                                  | probably high risk of bias                                                                                                                        | probably high risk of bias                                                                                                                                             | low risk of bias                                                                                                     | low risk of bias                                                                                                     | low risk of bias                                                                                                                       | low risk of bias                                                                                                               |
| doxycycline                              | standard care/placebo                      | 55459, Butler_doxycly                                               | Butler                                                                    | low risk of bias                                                                                                                                  | probably high risk of bias                                                                                                                                             | low risk of bias                                                                                                     | low risk of bias                                                                                                     | low risk of bias                                                                                                                       | probably high risk of bias                                                                                                     |
| doxycycline, ivermectin                  | ivermectin                                 | Ahmed                                                               | Ahmed                                                                     | probably low risk of bias                                                                                                                         | low risk of bias                                                                                                                                                       | low risk of bias                                                                                                     | low risk of bias                                                                                                     | probably low risk of bias                                                                                                              | probably low risk of bias                                                                                                      |
| doxycycline, ivermectin                  | standard care/placebo                      | Ahmed                                                               | Ahmed                                                                     | probably low risk of bias                                                                                                                         | low risk of bias                                                                                                                                                       | low risk of bias                                                                                                     | low risk of bias                                                                                                     | probably low risk of bias                                                                                                              | probably low risk of bias                                                                                                      |
| emtricitabine, tenofovir                 | standard care/placebo                      | Gaitan-Duarte                                                       | Gaitan-Duarte                                                             | low risk of bias                                                                                                                                  | probably high risk of bias                                                                                                                                             | low risk of bias                                                                                                     | low risk of bias                                                                                                     | probably low risk of bias                                                                                                              | probably low risk of bias                                                                                                      |
| famotidine                               | standard care/placebo                      | Samimagham                                                          | Samimagham                                                                | low risk of bias                                                                                                                                  | probably high risk of bias                                                                                                                                             | low risk of bias                                                                                                     | low risk of bias                                                                                                     | low risk of bias                                                                                                                       | low risk of bias                                                                                                               |
| favipiravir                              | lopinavir-ritonavir                        | 35903                                                               | Solaymani-Dodaran                                                         | low risk of bias                                                                                                                                  | probably high risk of bias                                                                                                                                             | high risk of bias                                                                                                    | high risk of bias                                                                                                    | low risk of bias                                                                                                                       | probably low risk of bias                                                                                                      |
| favipiravir                              | standard care/placebo                      | 24988, Udwadia                                                      | Udwadia                                                                   | probably high risk of bias                                                                                                                        | probably high risk of bias                                                                                                                                             | low risk of bias                                                                                                     | low risk of bias                                                                                                     | low risk of bias                                                                                                                       | low risk of bias                                                                                                               |

|                                         |                                         |                               |                        |                            |                            |                   |                  |                           |                            |
|-----------------------------------------|-----------------------------------------|-------------------------------|------------------------|----------------------------|----------------------------|-------------------|------------------|---------------------------|----------------------------|
| favipiravir, hydrochloroquine           | standard care/placebo                   | Bosaeed                       | Bosaeed                | low risk of bias           | probably high risk of bias | low risk of bias  | low risk of bias | low risk of bias          | low risk of bias           |
|                                         |                                         |                               |                        |                            |                            |                   |                  |                           |                            |
| ravir, inhaled nebulised interferon be  | hydroxychloroquine                      | 18336, Khamis                 | Khamis                 | probably high risk of bias | high risk of bias          | low risk of bias  | low risk of bias | probably low risk of bias | probably low risk of bias  |
|                                         |                                         |                               |                        |                            |                            |                   |                  |                           |                            |
| fluvoxamine                             | standard care/placebo                   | 18818                         | Lenze                  | low risk of bias           | low risk of bias           | high risk of bias | low risk of bias | low risk of bias          | low risk of bias           |
|                                         |                                         | 70784, Reis_2                 | Reis_2                 | low risk of bias           | low risk of bias           | low risk of bias  | low risk of bias | low risk of bias          | probably low risk of bias  |
| full-dose anticoagulation               | standard care/placebo                   | 13836                         | Lemos                  | low risk of bias           | probably high risk of bias | low risk of bias  | low risk of bias | probably low risk of bias | probably high risk of bias |
|                                         |                                         | 47030                         | Lopes_3                | low risk of bias           | probably high risk of bias | low risk of bias  | low risk of bias | low risk of bias          | probably low risk of bias  |
| hydrogen peroxide                       | standard care/placebo                   | 64234                         | Di Domenico            | low risk of bias           | low risk of bias           | low risk of bias  | low risk of bias | low risk of bias          | probably low risk of bias  |
|                                         |                                         |                               |                        |                            |                            |                   |                  |                           |                            |
| hydroxychloroquine                      | hydroxychloroquine, lopinavir-ritonavir | 52697                         | Arabi                  | low risk of bias           | probably high risk of bias | low risk of bias  | low risk of bias | low risk of bias          | low risk of bias           |
|                                         |                                         |                               |                        |                            |                            |                   |                  |                           |                            |
| hydroxychloroquine                      | hydroxychloroquine, zinc                | 21407                         | Abd-Elsalam            | probably high risk of bias | probably high risk of bias | low risk of bias  | low risk of bias | probably low risk of bias | low risk of bias           |
|                                         |                                         |                               |                        |                            |                            |                   |                  |                           |                            |
| hydroxychloroquine                      | interferon beta, lopinavir-ritonavir    | 45662, Ader_1                 | Ader_1                 | low risk of bias           | probably high risk of bias | low risk of bias  | low risk of bias | low risk of bias          | low risk of bias           |
|                                         |                                         |                               |                        |                            |                            |                   |                  |                           |                            |
| hydroxychloroquine                      | ivermectin                              | Gonzalez                      | Gonzalez               | probably high risk of bias | low risk of bias           | low risk of bias  | low risk of bias | low risk of bias          | low risk of bias           |
|                                         |                                         |                               |                        |                            |                            |                   |                  |                           |                            |
| hydroxychloroquine                      | lopinavir-ritonavir                     | pilot_4                       | Huang_1                | probably high risk of bias | probably high risk of bias | low risk of bias  | low risk of bias | low risk of bias          | probably low risk of bias  |
|                                         |                                         | 45662, Ader_1                 | Ader_1                 | low risk of bias           | probably high risk of bias | low risk of bias  | low risk of bias | low risk of bias          | low risk of bias           |
|                                         |                                         | 52697                         | Arabi                  | low risk of bias           | probably high risk of bias | low risk of bias  | low risk of bias | low risk of bias          | low risk of bias           |
| hydroxychloroquine                      | standard care/placebo                   | 6987                          | Chen_4                 | probably high risk of bias | probably high risk of bias | high risk of bias | low risk of bias | low risk of bias          | low risk of bias           |
|                                         |                                         | 14989, 8444, xx               | Horby_2                | low risk of bias           | probably high risk of bias | low risk of bias  | low risk of bias | low risk of bias          | low risk of bias           |
|                                         |                                         | 22152, 9166                   | Cavalcanti             | low risk of bias           | probably high risk of bias | low risk of bias  | low risk of bias | low risk of bias          | low risk of bias           |
|                                         |                                         | 11299                         | Abd-Elsalam_1          | probably high risk of bias | probably high risk of bias | low risk of bias  | low risk of bias | probably low risk of bias | low risk of bias           |
|                                         |                                         | 13936                         | Ulrich                 | probably low risk of bias  | low risk of bias           | low risk of bias  | low risk of bias | low risk of bias          | low risk of bias           |
|                                         |                                         | 15632, Pan_hydroxychloroquine | Pan_hydroxychloroquine | low risk of bias           | probably high risk of bias | low risk of bias  | low risk of bias | low risk of bias          | low risk of bias           |
|                                         |                                         | 16281                         | Lyngbakken             | probably high risk of bias | probably high risk of bias | low risk of bias  | low risk of bias | probably low risk of bias | low risk of bias           |
|                                         |                                         | 33489, Johnston               | Johnston               | probably low risk of bias  | low risk of bias           | low risk of bias  | low risk of bias | low risk of bias          | low risk of bias           |
|                                         |                                         | 45662, Ader_1                 | Ader_1                 | low risk of bias           | probably high risk of bias | low risk of bias  | low risk of bias | low risk of bias          | low risk of bias           |
|                                         |                                         | 29663                         | Hernandez-Cardenas     | low risk of bias           | low risk of bias           | low risk of bias  | low risk of bias | high risk of bias         | low risk of bias           |
|                                         |                                         | Gonzalez                      | Gonzalez               | probably high risk of bias | low risk of bias           | low risk of bias  | low risk of bias | low risk of bias          | low risk of bias           |
|                                         |                                         | 41434                         | Réa-Neto               | low risk of bias           | probably high risk of bias | low risk of bias  | low risk of bias | low risk of bias          | low risk of bias           |
|                                         |                                         | 52697                         | Arabi                  | low risk of bias           | probably high risk of bias | low risk of bias  | low risk of bias | low risk of bias          | low risk of bias           |
| hydroxychloroquine, lopinavir-ritonavir | hydroxychloroquine, umifenovir          | 23259, 8                      | Nojomi                 | low risk of bias           | probably high risk of bias | low risk of bias  | low risk of bias | low risk of bias          | low risk of bias           |
|                                         |                                         |                               |                        |                            |                            |                   |                  |                           |                            |
| hydroxychloroquine, lopinavir-ritonavir | lopinavir-ritonavir                     | 52697                         | Arabi                  | low risk of bias           | probably high risk of bias | low risk of bias  | low risk of bias | low risk of bias          | low risk of bias           |
|                                         |                                         |                               |                        |                            |                            |                   |                  |                           |                            |
| hydroxychloroquine, lopinavir-ritonavir | standard care/placebo                   | 52697                         | Arabi                  | low risk of bias           | probably high risk of bias | low risk of bias  | low risk of bias | low risk of bias          | low risk of bias           |
|                                         |                                         |                               |                        |                            |                            |                   |                  |                           |                            |
| hydroxychloroquine, rivabirin           | lopinavir-ritonavir, ribavirin          | 46308_severe                  | Singh_3                | probably high risk of bias | probably high risk of bias | low risk of bias  | low risk of bias | probably low risk of bias | low risk of bias           |
|                                         |                                         |                               |                        |                            |                            |                   |                  |                           |                            |
| hydroxychloroquine, rivabirin           | standard care/placebo                   | 46308_non severe              | Singh_2                | probably high risk of bias | probably high risk of bias | low risk of bias  | low risk of bias | probably low risk of bias | low risk of bias           |
|                                         |                                         | 46308_severe                  | Singh_3                | probably high risk of bias | probably high risk of bias | low risk of bias  | low risk of bias | probably low risk of bias | low risk of bias           |
| inhaled nebulised interferon beta-1a    | standard care/placebo                   |                               |                        |                            |                            |                   |                  |                           |                            |
|                                         |                                         |                               |                        |                            |                            |                   |                  |                           |                            |

|                                      |                                      |                          |                         |                            |                            |                            |                  |                            |                            |
|--------------------------------------|--------------------------------------|--------------------------|-------------------------|----------------------------|----------------------------|----------------------------|------------------|----------------------------|----------------------------|
|                                      |                                      | 18657                    | Monk                    | low risk of bias           | low risk of bias           | high risk of bias          | low risk of bias | probably high risk of bias | low risk of bias           |
| inhaled pan-JAK inhibitor            | standard care/placebo                | 34842                    | Singh_1                 | probably low risk of bias  | low risk of bias           | low risk of bias           | low risk of bias | probably low risk of bias  | low risk of bias           |
| interferon alpha                     | combinant super combinant interferon | 32737, 7, 9574           | Li_2                    | probably high risk of bias | probably high risk of bias | low risk of bias           | low risk of bias | low risk of bias           | low risk of bias           |
| interferon alpha                     | standard care/placebo                | 35022                    | Pandit                  | probably high risk of bias | probably high risk of bias | low risk of bias           | low risk of bias | probably low risk of bias  | low risk of bias           |
|                                      |                                      | 59366, 60209             | Bhushan                 | probably high risk of bias | probably high risk of bias | low risk of bias           | low risk of bias | probably high risk of bias | low risk of bias           |
| interferon beta                      | standard care/placebo                | 11541, 11937             | Rahmani                 | probably high risk of bias | probably high risk of bias | high risk of bias          | low risk of bias | low risk of bias           | low risk of bias           |
|                                      |                                      | 15632, Pan_interfer      | Pan_interferon          | low risk of bias           | probably high risk of bias | low risk of bias           | low risk of bias | low risk of bias           | low risk of bias           |
|                                      |                                      | 39381, Darazam (2        | Darazam_2               | low risk of bias           | probably high risk of bias | low risk of bias           | low risk of bias | low risk of bias           | low risk of bias           |
|                                      |                                      | Kalil_2                  | Kalil_2                 | low risk of bias           | low risk of bias           | low risk of bias           | low risk of bias | low risk of bias           | low risk of bias           |
|                                      |                                      | 11243, 5514, 824:        | Davoudi-Monfared        | low risk of bias           | high risk of bias          | probably high risk of bias | low risk of bias | low risk of bias           | probably high risk of bias |
| interferon beta, lopinavir-ritonavir | antihypociviral                      | Mostafa                  | Alavi-Moghaddam         | probably high risk of bias | probably high risk of bias | low risk of bias           | low risk of bias | low risk of bias           | low risk of bias           |
| interferon beta, lopinavir-ritonavir | lopinavir-ritonavir                  | 45662, Ader_1            | Ader_1                  | low risk of bias           | probably high risk of bias | low risk of bias           | low risk of bias | low risk of bias           | low risk of bias           |
| interferon beta, lopinavir-ritonavir | standard care/placebo                | 45662, Ader_1            | Ader_1                  | low risk of bias           | probably high risk of bias | low risk of bias           | low risk of bias | low risk of bias           | low risk of bias           |
| interferon beta, ribavirin           | standard care/placebo                | 2942                     | Hung                    | probably high risk of bias | probably high risk of bias | low risk of bias           | low risk of bias | low risk of bias           | low risk of bias           |
| interferon kappa, trefoil factor 2   | standard care/placebo                | 13797                    | Fu                      | probably high risk of bias | probably high risk of bias | low risk of bias           | low risk of bias | low risk of bias           | low risk of bias           |
| intranasal corticosteroids           | standard care/placebo                | 57833                    | Song                    | probably high risk of bias | probably high risk of bias | low risk of bias           | low risk of bias | probably low risk of bias  | low risk of bias           |
| itraconazole                         | standard care/placebo                | 36093, Liesenborgl       | Liesenborghs            | probably high risk of bias | probably high risk of bias | low risk of bias           | low risk of bias | probably low risk of bias  | low risk of bias           |
| ivermectin                           | standard care/placebo                | Niaee                    | Niaee                   | low risk of bias           | probably high risk of bias | low risk of bias           | low risk of bias | low risk of bias           | low risk of bias           |
|                                      |                                      | Ahmed                    | Ahmed                   | probably low risk of bias  | low risk of bias           | low risk of bias           | low risk of bias | probably low risk of bias  | probably low risk of bias  |
|                                      |                                      | Abdulmir_Rezai           | Rezai                   | low risk of bias           | low risk of bias           | probably low risk of bias  | low risk of bias | probably low risk of bias  | probably high risk of bias |
|                                      |                                      | Gonzalez                 | Gonzalez                | probably high risk of bias | low risk of bias           | low risk of bias           | low risk of bias | low risk of bias           | low risk of bias           |
|                                      |                                      | 47181, Abd-Elsalam       | Abd-Elsalam_3           | probably high risk of bias | probably high risk of bias | low risk of bias           | low risk of bias | low risk of bias           | low risk of bias           |
| leflunomide                          | standard care/placebo                | 13540                    | Wang_5                  | probably high risk of bias | probably high risk of bias | low risk of bias           | low risk of bias | probably low risk of bias  | low risk of bias           |
| levamisole                           | standard care/placebo                | 37198, Roostaei Firoz    | Roostaei Firozabad      | probably low risk of bias  | low risk of bias           | low risk of bias           | low risk of bias | probably low risk of bias  | low risk of bias           |
| lopinavir-ritonavir                  | lopinavir-ritonavir, ribavirin       | 10067, 2615              | Huang_2                 | probably high risk of bias | probably high risk of bias | low risk of bias           | low risk of bias | probably low risk of bias  | low risk of bias           |
| lopinavir-ritonavir                  | ribavirin                            | 10067, 2615              | Huang_2                 | probably high risk of bias | probably high risk of bias | low risk of bias           | low risk of bias | probably low risk of bias  | low risk of bias           |
| lopinavir-ritonavir                  | standard care/placebo                | 330                      | Cao_1                   | low risk of bias           | probably high risk of bias | low risk of bias           | low risk of bias | low risk of bias           | low risk of bias           |
|                                      |                                      | 14781, 14883             | Hoby_3                  | low risk of bias           | probably high risk of bias | low risk of bias           | low risk of bias | low risk of bias           | low risk of bias           |
|                                      |                                      | 15632, Pan_lopinavir-rit | Pan_lopinavir-ritonavir | low risk of bias           | probably high risk of bias | low risk of bias           | low risk of bias | low risk of bias           | low risk of bias           |
|                                      |                                      | 45662, Ader_1            | Ader_1                  | low risk of bias           | probably high risk of bias | low risk of bias           | low risk of bias | low risk of bias           | low risk of bias           |
|                                      |                                      | 52697                    | Arabi                   | low risk of bias           | probably high risk of bias | low risk of bias           | low risk of bias | low risk of bias           | low risk of bias           |
| lopinavir-ritonavir, ribavirin       | ribavirin                            |                          |                         |                            |                            |                            |                  |                            |                            |

|                                     |                       |                                                                                 |                                                                          |                                                                                                  |                                                                                                                       |                                                                                                           |                                                                                                  |                                                                                                           |                                                                                                            |
|-------------------------------------|-----------------------|---------------------------------------------------------------------------------|--------------------------------------------------------------------------|--------------------------------------------------------------------------------------------------|-----------------------------------------------------------------------------------------------------------------------|-----------------------------------------------------------------------------------------------------------|--------------------------------------------------------------------------------------------------|-----------------------------------------------------------------------------------------------------------|------------------------------------------------------------------------------------------------------------|
|                                     |                       | 10067, 2615                                                                     | Huang_2                                                                  | probably high risk of bias                                                                       | probably high risk of bias                                                                                            | low risk of bias                                                                                          | low risk of bias                                                                                 | probably low risk of bias                                                                                 | low risk of bias                                                                                           |
| lopinavir-ritonavir, ribavirin      | standard care/placebo | 46308_severe                                                                    | Singh_3                                                                  | probably high risk of bias                                                                       | probably high risk of bias                                                                                            | low risk of bias                                                                                          | low risk of bias                                                                                 | probably low risk of bias                                                                                 | low risk of bias                                                                                           |
| mavrilimumab                        | standard care/placebo | 36763                                                                           | Cremer_2                                                                 | low risk of bias                                                                                 | low risk of bias                                                                                                      | low risk of bias                                                                                          | low risk of bias                                                                                 | low risk of bias                                                                                          | low risk of bias                                                                                           |
| melatonin                           | standard care/placebo | Farnoosh                                                                        | Farnoosh                                                                 | probably low risk of bias                                                                        | low risk of bias                                                                                                      | high risk of bias                                                                                         | low risk of bias                                                                                 | probably high risk of bias                                                                                | low risk of bias                                                                                           |
| methylene blue                      | standard care/placebo | 45012 Alamdari                                                                  | Hamidi-Alamdari Alamdari                                                 | probably high risk of bias<br>probably high risk of bias                                         | probably high risk of bias<br>probably high risk of bias                                                              | low risk of bias<br>low risk of bias                                                                      | low risk of bias<br>low risk of bias                                                             | low risk of bias<br>low risk of bias                                                                      | low risk of bias<br>low risk of bias                                                                       |
| mupadolimab                         | standard care/placebo | Miller                                                                          | Miller                                                                   | probably low risk of bias                                                                        | low risk of bias                                                                                                      | low risk of bias                                                                                          | low risk of bias                                                                                 | probably low risk of bias                                                                                 | low risk of bias                                                                                           |
| nitazoxanide                        | standard care/placebo | 50790, Blum                                                                     | Blum                                                                     | low risk of bias                                                                                 | low risk of bias                                                                                                      | low risk of bias                                                                                          | low risk of bias                                                                                 | low risk of bias                                                                                          | low risk of bias                                                                                           |
| nitric oxide                        | standard care/placebo | Moni                                                                            | Moni                                                                     | low risk of bias                                                                                 | probably high risk of bias                                                                                            | probably low risk of bias                                                                                 | low risk of bias                                                                                 | low risk of bias                                                                                          | low risk of bias                                                                                           |
| opaganib                            | standard care/placebo | Winthrop                                                                        | Winthrop                                                                 | low risk of bias                                                                                 | low risk of bias                                                                                                      | low risk of bias                                                                                          | low risk of bias                                                                                 | low risk of bias                                                                                          | low risk of bias                                                                                           |
| pentoxifylline                      | standard care/placebo | 21098<br>67125                                                                  | Malonado<br>Azizi                                                        | probably high risk of bias<br>probably low risk of bias                                          | probably high risk of bias<br>low risk of bias                                                                        | high risk of bias<br>high risk of bias                                                                    | low risk of bias<br>low risk of bias                                                             | probably low risk of bias<br>low risk of bias                                                             | low risk of bias<br>high risk of bias                                                                      |
| polymerized type I collagen         | standard care/placebo | Méndez-Flores                                                                   | Méndez-Flores                                                            | probably low risk of bias                                                                        | low risk of bias                                                                                                      | low risk of bias                                                                                          | low risk of bias                                                                                 | probably low risk of bias                                                                                 | low risk of bias                                                                                           |
| probiotics                          | standard care/placebo | 68436                                                                           | Ivashkin                                                                 | probably high risk of bias                                                                       | probably high risk of bias                                                                                            | low risk of bias                                                                                          | low risk of bias                                                                                 | low risk of bias                                                                                          | low risk of bias                                                                                           |
| progesterone                        | standard care/placebo | 32075, Ghandehai                                                                | Ghandehari                                                               | probably high risk of bias                                                                       | probably high risk of bias                                                                                            | low risk of bias                                                                                          | low risk of bias                                                                                 | low risk of bias                                                                                          | probably low risk of bias                                                                                  |
| proxalutamide                       | standard care/placebo | 48943                                                                           | Cadegiani_5                                                              | high risk of bias                                                                                | probably high risk of bias                                                                                            | low risk of bias                                                                                          | low risk of bias                                                                                 | low risk of bias                                                                                          | low risk of bias                                                                                           |
| pyridostigmine                      | standard care/placebo | Fragoso-Saavedra                                                                | Fragoso-Saavedra                                                         | probably low risk of bias                                                                        | low risk of bias                                                                                                      | low risk of bias                                                                                          | low risk of bias                                                                                 | probably low risk of bias                                                                                 | probably low risk of bias                                                                                  |
| quercetin                           | standard care/placebo | 49941                                                                           | Di Pierro_1                                                              | probably high risk of bias                                                                       | probably high risk of bias                                                                                            | low risk of bias                                                                                          | low risk of bias                                                                                 | probably low risk of bias                                                                                 | low risk of bias                                                                                           |
| nt human granulocyte colony-stimula | standard care/placebo | 12705                                                                           | Cheng                                                                    | low risk of bias                                                                                 | probably high risk of bias                                                                                            | low risk of bias                                                                                          | low risk of bias                                                                                 | low risk of bias                                                                                          | low risk of bias                                                                                           |
| remdesivir                          | standard care/placebo | 2408<br>11347<br>15633, 3821<br>15632, Pan_remdes<br>Ader (remdesivir)<br>68059 | Wang_1<br>Spinner<br>Beigel<br>Pan_remdesivir<br>Ader_2<br>Abd-Elsalam_4 | low risk of bias<br>low risk of bias<br>low risk of bias<br>low risk of bias<br>low risk of bias | low risk of bias<br>high risk of bias<br>low risk of bias<br>probably high risk of bias<br>probably high risk of bias | low risk of bias<br>probably low risk of bias<br>low risk of bias<br>low risk of bias<br>low risk of bias | low risk of bias<br>low risk of bias<br>low risk of bias<br>low risk of bias<br>low risk of bias | low risk of bias<br>low risk of bias<br>low risk of bias<br>low risk of bias<br>probably low risk of bias | low risk of bias<br>low risk of bias<br>low risk of bias<br>low risk of bias<br>probably high risk of bias |
| ribavirin, sofosbuvir-daclatasvir   | standard care/placebo | 11010                                                                           | Kasgari                                                                  | low risk of bias                                                                                 | probably high risk of bias                                                                                            | low risk of bias                                                                                          | low risk of bias                                                                                 | probably low risk of bias                                                                                 | probably low risk of bias                                                                                  |
| secukinumab                         | standard care/placebo | Resende                                                                         | Resende                                                                  | probably high risk of bias                                                                       | probably high risk of bias                                                                                            | low risk of bias                                                                                          | low risk of bias                                                                                 | low risk of bias                                                                                          | low risk of bias                                                                                           |
| serine protease inhibitors          | standard care/placebo |                                                                                 |                                                                          |                                                                                                  |                                                                                                                       |                                                                                                           |                                                                                                  |                                                                                                           |                                                                                                            |

|                             |                             |                                                                      |                                            |                                                                                                  |                                                                                                  |                                                                                         |                                                                              |                                                                                       |                                                                              |
|-----------------------------|-----------------------------|----------------------------------------------------------------------|--------------------------------------------|--------------------------------------------------------------------------------------------------|--------------------------------------------------------------------------------------------------|-----------------------------------------------------------------------------------------|------------------------------------------------------------------------------|---------------------------------------------------------------------------------------|------------------------------------------------------------------------------|
|                             |                             | 40853<br>70176                                                       | Gunst<br>Zhuravel                          | low risk of bias<br>low risk of bias                                                             | low risk of bias<br>probably high risk of bias                                                   | low risk of bias<br>low risk of bias                                                    | low risk of bias<br>low risk of bias                                         | low risk of bias<br>low risk of bias                                                  | low risk of bias<br>probably low risk of bias                                |
| sildenafil                  | standard care/placebo       | Santamarina                                                          | Santamarina                                | low risk of bias                                                                                 | low risk of bias                                                                                 | probably low risk of bias                                                               | low risk of bias                                                             | probably low risk of bias                                                             | low risk of bias                                                             |
| sitagliptin                 | sitagliptin, spironolactone | Abbasi                                                               | Abbasi                                     | probably high risk of bias                                                                       | probably high risk of bias                                                                       | low risk of bias                                                                        | low risk of bias                                                             | probably low risk of bias                                                             | low risk of bias                                                             |
| sitagliptin                 | spironolactone              | Abbasi                                                               | Abbasi                                     | probably high risk of bias                                                                       | probably high risk of bias                                                                       | low risk of bias                                                                        | low risk of bias                                                             | probably low risk of bias                                                             | low risk of bias                                                             |
| sitagliptin                 | standard care/placebo       | Abbasi                                                               | Abbasi                                     | probably high risk of bias                                                                       | probably high risk of bias                                                                       | low risk of bias                                                                        | low risk of bias                                                             | probably low risk of bias                                                             | low risk of bias                                                             |
| sitagliptin, spironolactone | spironolactone              | Abbasi                                                               | Abbasi                                     | probably high risk of bias                                                                       | probably high risk of bias                                                                       | low risk of bias                                                                        | low risk of bias                                                             | probably low risk of bias                                                             | low risk of bias                                                             |
| sitagliptin, spironolactone | standard care/placebo       | Abbasi                                                               | Abbasi                                     | probably high risk of bias                                                                       | probably high risk of bias                                                                       | low risk of bias                                                                        | low risk of bias                                                             | probably low risk of bias                                                             | low risk of bias                                                             |
| spironolactone              | standard care/placebo       | Abbasi                                                               | Abbasi                                     | probably high risk of bias                                                                       | probably high risk of bias                                                                       | low risk of bias                                                                        | low risk of bias                                                             | probably low risk of bias                                                             | low risk of bias                                                             |
| statins                     | standard care/placebo       | Ghati<br>64621                                                       | Ghati<br>Davoodi_2                         | probably high risk of bias<br>low risk of bias                                                   | probably high risk of bias<br>low risk of bias                                                   | low risk of bias<br>low risk of bias                                                    | low risk of bias<br>low risk of bias                                         | low risk of bias<br>probably low risk of bias                                         | low risk of bias<br>probably low risk of bias                                |
| sulodexide                  | standard care/placebo       | 21816, 34575                                                         | Gonzalez-Ochoa                             | probably low risk of bias                                                                        | low risk of bias                                                                                 | low risk of bias                                                                        | low risk of bias                                                             | low risk of bias                                                                      | low risk of bias                                                             |
| tyrosine kinase inhibitors  | standard care/placebo       | 49287                                                                | Aman                                       | low risk of bias                                                                                 | low risk of bias                                                                                 | low risk of bias                                                                        | low risk of bias                                                             | probably low risk of bias                                                             | probably high risk of bias                                                   |
| umifenovir                  | standard care/placebo       | 24810<br>35511<br>52841                                              | Yadegarinia<br>Khodashahi<br>Darazam_3     | high risk of bias<br>probably low risk of bias<br>low risk of bias                               | probably high risk of bias<br>probably high risk of bias<br>probably high risk of bias           | low risk of bias<br>low risk of bias<br>low risk of bias                                | low risk of bias<br>low risk of bias<br>low risk of bias                     | probably high risk of bias<br>probably low risk of bias<br>probably low risk of bias  | low risk of bias<br>low risk of bias<br>low risk of bias                     |
| vitamin C                   | standard care/placebo       | 26123, Zhang<br>25793<br>31401, JamaliMoghadamtamaliMoghadamSiahkali | Zhang_1<br>Kumari                          | low risk of bias<br>probably high risk of bias<br>probably high risk of bias                     | low risk of bias<br>probably high risk of bias<br>probably high risk of bias                     | low risk of bias<br>low risk of bias<br>low risk of bias                                | low risk of bias<br>low risk of bias<br>low risk of bias                     | probably low risk of bias<br>probably low risk of bias<br>probably low risk of bias   | probably high risk of bias<br>low risk of bias<br>low risk of bias           |
| vitamin C, vitamin E        | standard care/placebo       | 68016                                                                | Hakamifard                                 | probably high risk of bias                                                                       | probably high risk of bias                                                                       | low risk of bias                                                                        | low risk of bias                                                             | low risk of bias                                                                      | low risk of bias                                                             |
| vitamin D                   | standard care/placebo       | 18947, 31936<br>44830<br>46627<br>68594                              | Murai<br>Lakkireddy<br>Elamir<br>Maghbooli | probably low risk of bias<br>high risk of bias<br>probably high risk of bias<br>low risk of bias | low risk of bias<br>probably high risk of bias<br>probably high risk of bias<br>low risk of bias | low risk of bias<br>high risk of bias<br>low risk of bias<br>probably high risk of bias | low risk of bias<br>low risk of bias<br>low risk of bias<br>low risk of bias | low risk of bias<br>low risk of bias<br>probably low risk of bias<br>low risk of bias | low risk of bias<br>low risk of bias<br>low risk of bias<br>low risk of bias |

| ICU Length of Stay                         |                                         |                                |                |                            |                              |                      |                        |                           |                            |
|--------------------------------------------|-----------------------------------------|--------------------------------|----------------|----------------------------|------------------------------|----------------------|------------------------|---------------------------|----------------------------|
| Treatment 1                                | Treatment 2                             | Trial                          | First author   | Randomization              | Deviations from the intended | Missing outcome data | Measurement of outcome | Selection of the reported | Other (Competing risks)    |
| (acetyl)cysteine                           | standard care/placebo                   | 13687                          | de Alencar     | low risk of bias           | low risk of bias             | low risk of bias     | low risk of bias       | probably low risk of bias | low risk of bias           |
|                                            |                                         | 48051                          | Taher          | probably low risk of bias  | low risk of bias             | low risk of bias     | low risk of bias       | probably low risk of bias | low risk of bias           |
| 5-alpha reductase inhibitor                | standard care/placebo                   | 35590                          | Zarehoseinzade | probably low risk of bias  | probably low risk of bias    | low risk of bias     | low risk of bias       | probably low risk of bias | low risk of bias           |
| ACEi/ARB                                   | calcium channel blockers                | 34054                          | Nouri-Vaskeh   | low risk of bias           | low risk of bias             | low risk of bias     | low risk of bias       | probably low risk of bias | low risk of bias           |
| GM-CSF inhibitor                           | standard care/placebo                   | Patel_2                        | Patel_2        | probably low risk of bias  | low risk of bias             | low risk of bias     | low risk of bias       | low risk of bias          | low risk of bias           |
| IL1 inhibitors                             | standard care/placebo                   | Kyriazopoulou                  | Kyriazopoulou  | low risk of bias           | low risk of bias             | low risk of bias     | low risk of bias       | low risk of bias          | low risk of bias           |
| 6 receptor antagonists, corticosteroid     | standard care/placebo                   | 47857                          | Hamed          | probably high risk of bias | probably high risk of bias   | low risk of bias     | low risk of bias       | probably low risk of bias | low risk of bias           |
| receptor antagonists, corticosteroids (sys | standard care/placebo                   | 33303, Rosas                   | Rosas          | low risk of bias           | probably high risk of bias   | low risk of bias     | low risk of bias       | low risk of bias          | low risk of bias           |
|                                            |                                         | 33304, Gordon_v1, Gori         | Gordon_1       | low risk of bias           | probably high risk of bias   | low risk of bias     | low risk of bias       | low risk of bias          | low risk of bias           |
|                                            |                                         | 34439                          | Soin           | probably high risk of bias | probably high risk of bias   | low risk of bias     | low risk of bias       | low risk of bias          | low risk of bias           |
|                                            |                                         | Rutgers                        | Rutgers        | probably high risk of bias | probably high risk of bias   | low risk of bias     | low risk of bias       | probably low risk of bias | low risk of bias           |
| JAK inhibitors                             | standard care/placebo                   | 62263, Marconi, Marci          | Marconi        | low risk of bias           | low risk of bias             | low risk of bias     | low risk of bias       | low risk of bias          | low risk of bias           |
|                                            |                                         | 48879                          | Guimarães      | low risk of bias           | low risk of bias             | low risk of bias     | low risk of bias       | low risk of bias          | probably low risk of bias  |
|                                            |                                         | Ely, WHO_COV-BARRIER_Addendum, | Ely            | low risk of bias           | low risk of bias             | low risk of bias     | low risk of bias       | low risk of bias          | low risk of bias           |
| TNF inhibitors                             | standard care/placebo                   | 52260                          | Fakharian      | probably high risk of bias | probably high risk of bias   | low risk of bias     | low risk of bias       | low risk of bias          | low risk of bias           |
| antihypertensive                           | standard care/placebo                   | 29517                          | Nourian        | low risk of bias           | high risk of bias            | low risk of bias     | low risk of bias       | probably low risk of bias | low risk of bias           |
| azithromycin                               | standard care/placebo                   | 11639, 12378                   | Sekhavi        | probably high risk of bias | probably high risk of bias   | low risk of bias     | low risk of bias       | probably low risk of bias | low risk of bias           |
| bradykinin inhibitors                      | standard care/placebo                   | 10832                          | Mansour        | low risk of bias           | probably high risk of bias   | low risk of bias     | low risk of bias       | probably low risk of bias | probably low risk of bias  |
| bromhexine hydrochloride                   | standard care/placebo                   | 35697                          | Tolouian       | probably high risk of bias | probably high risk of bias   | low risk of bias     | low risk of bias       | probably low risk of bias | probably high risk of bias |
| colchicine                                 | standard care/placebo                   | 10500, xx                      | Lopes_2        | probably low risk of bias  | low risk of bias             | low risk of bias     | low risk of bias       | probably low risk of bias | probably low risk of bias  |
|                                            |                                         | 64385                          | Pascual-Figal  | low risk of bias           | probably high risk of bias   | low risk of bias     | low risk of bias       | low risk of bias          | low risk of bias           |
| corticosteroids (systemic)                 | standard care/placebo                   | 12146                          | Angus          | probably high risk of bias | probably high risk of bias   | low risk of bias     | low risk of bias       | low risk of bias          | low risk of bias           |
|                                            |                                         | 2                              | Farahani       | probably low risk of bias  | probably low risk of bias    | low risk of bias     | low risk of bias       | probably low risk of bias | low risk of bias           |
|                                            |                                         | 31583                          | Jamaati        | probably high risk of bias | probably high risk of bias   | low risk of bias     | low risk of bias       | probably low risk of bias | low risk of bias           |
| full-dose anticoagulation                  | standard care/placebo                   | 35895, Bikdeli                 | Bikdeli        | low risk of bias           | probably high risk of bias   | low risk of bias     | low risk of bias       | low risk of bias          | low risk of bias           |
| full-dose anticoagulation, thrombolysis    | standard care/placebo                   | 65552_P1                       | Barrett_P1     | low risk of bias           | probably high risk of bias   | low risk of bias     | low risk of bias       | probably low risk of bias | low risk of bias           |
|                                            |                                         | 65552_P2                       | Barrett_P2     | low risk of bias           | probably high risk of bias   | low risk of bias     | low risk of bias       | probably low risk of bias | probably high risk of bias |
| hydroxychloroquine                         | hydroxychloroquine, lopinavir-ritonavir | 52697                          | Arabi          | low risk of bias           | probably high risk of bias   | low risk of bias     | low risk of bias       | low risk of bias          | low risk of bias           |
| hydroxychloroquine                         | lopinavir-ritonavir                     |                                |                |                            |                              |                      |                        |                           |                            |

|                                         |                             |                                             |                  |                            |                            |                            |                  |                           |                            |
|-----------------------------------------|-----------------------------|---------------------------------------------|------------------|----------------------------|----------------------------|----------------------------|------------------|---------------------------|----------------------------|
|                                         |                             | 52697                                       | Arabi            | low risk of bias           | probably high risk of bias | low risk of bias           | low risk of bias | low risk of bias          | low risk of bias           |
| hydroxychloroquine                      | standard care/placebo       | 41434                                       | Réa-Neto         | low risk of bias           | probably high risk of bias | low risk of bias           | low risk of bias | low risk of bias          | low risk of bias           |
|                                         |                             | 52697                                       | Arabi            | low risk of bias           | probably high risk of bias | low risk of bias           | low risk of bias | low risk of bias          | low risk of bias           |
| hydroxychloroquine, lopinavir-ritonavir | lopinavir-ritonavir         | 52697                                       | Arabi            | low risk of bias           | probably high risk of bias | low risk of bias           | low risk of bias | low risk of bias          | low risk of bias           |
| hydroxychloroquine, lopinavir-ritonavir | standard care/placebo       | 52697                                       | Arabi            | low risk of bias           | probably high risk of bias | low risk of bias           | low risk of bias | low risk of bias          | low risk of bias           |
| interferon beta                         | standard care/placebo       | 11541, 11937                                | Rahmani          | probably high risk of bias | probably high risk of bias | high risk of bias          | low risk of bias | probably low risk of bias | low risk of bias           |
|                                         |                             | 11243, 5514, 824                            | Davoudi-Monfared | low risk of bias           | high risk of bias          | probably high risk of bias | low risk of bias | probably low risk of bias | probably high risk of bias |
| itraconazole                            | standard care/placebo       | 36093, Liesenborgl                          | Liesenborghs     | probably high risk of bias | probably high risk of bias | low risk of bias           | low risk of bias | probably low risk of bias | low risk of bias           |
| lopinavir-ritonavir                     | standard care/placebo       | 330                                         | Cao_1            | low risk of bias           | probably high risk of bias | low risk of bias           | low risk of bias | probably low risk of bias | low risk of bias           |
|                                         |                             | 52697                                       | Arabi            | low risk of bias           | probably high risk of bias | low risk of bias           | low risk of bias | low risk of bias          | low risk of bias           |
| melatonin, vitamin C, zinc sulfate      | standard care/placebo       | 61784                                       | Darban           | probably high risk of bias | probably high risk of bias | low risk of bias           | low risk of bias | probably low risk of bias | low risk of bias           |
| nitric oxide                            | standard care/placebo       | Moni                                        | Moni             | low risk of bias           | probably high risk of bias | probably low risk of bias  | low risk of bias | low risk of bias          | low risk of bias           |
| pentoxifylline                          | standard care/placebo       | 67125                                       | Azizi            | probably low risk of bias  | low risk of bias           | high risk of bias          | low risk of bias | probably low risk of bias | low risk of bias           |
| ribavirin, sofosbuvir-daclatasvir       | standard care/placebo       | 11010                                       | Kasgari          | low risk of bias           | probably high risk of bias | low risk of bias           | low risk of bias | probably low risk of bias | low risk of bias           |
| secukinumab                             | standard care/placebo       | Resende                                     | Resende          | probably high risk of bias | probably high risk of bias | low risk of bias           | low risk of bias | low risk of bias          | low risk of bias           |
| sildenafil                              | standard care/placebo       | Santamarina                                 | Santamarina      | low risk of bias           | low risk of bias           | probably low risk of bias  | low risk of bias | probably low risk of bias | low risk of bias           |
| sitagliptin                             | sitagliptin, spironolactone | Abbasi                                      | Abbasi           | probably high risk of bias | probably high risk of bias | low risk of bias           | low risk of bias | probably low risk of bias | probably low risk of bias  |
| sitagliptin                             | spironolactone              | Abbasi                                      | Abbasi           | probably high risk of bias | probably high risk of bias | low risk of bias           | low risk of bias | probably low risk of bias | probably low risk of bias  |
| sitagliptin                             | standard care/placebo       | Abbasi                                      | Abbasi           | probably high risk of bias | probably high risk of bias | low risk of bias           | low risk of bias | probably low risk of bias | probably low risk of bias  |
| sitagliptin, spironolactone             | spironolactone              | Abbasi                                      | Abbasi           | probably high risk of bias | probably high risk of bias | low risk of bias           | low risk of bias | probably low risk of bias | probably low risk of bias  |
| sitagliptin, spironolactone             | standard care/placebo       | Abbasi                                      | Abbasi           | probably high risk of bias | probably high risk of bias | low risk of bias           | low risk of bias | probably low risk of bias | probably low risk of bias  |
| spironolactone                          | standard care/placebo       | Abbasi                                      | Abbasi           | probably high risk of bias | probably high risk of bias | low risk of bias           | low risk of bias | probably low risk of bias | probably low risk of bias  |
| tyrosine kinase inhibitors              | standard care/placebo       | 49287                                       | Aman             | low risk of bias           | low risk of bias           | low risk of bias           | low risk of bias | low risk of bias          | low risk of bias           |
|                                         |                             | 60872                                       | Strich           | probably low risk of bias  | low risk of bias           | low risk of bias           | low risk of bias | low risk of bias          | low risk of bias           |
| vitamin C                               | standard care/placebo       | 26123, Zhang                                | Zhang_1          | low risk of bias           | low risk of bias           | low risk of bias           | low risk of bias | low risk of bias          | probably high risk of bias |
|                                         |                             | 31401, JamaliMoghadamtamaliMoghadamSiahkali |                  | probably high risk of bias | probably high risk of bias | low risk of bias           | low risk of bias | probably low risk of bias | low risk of bias           |

|           |                       |       |           |                  |                  |                            |                  |                           |                  |
|-----------|-----------------------|-------|-----------|------------------|------------------|----------------------------|------------------|---------------------------|------------------|
| vitamin D | standard care/placebo | 68595 | Maghbooli | low risk of bias | low risk of bias | probably high risk of bias | low risk of bias | probably low risk of bias | low risk of bias |
|-----------|-----------------------|-------|-----------|------------------|------------------|----------------------------|------------------|---------------------------|------------------|

## Ventilator-Free Days

| Treatment 1                              | Treatment 2                             | Trial                          | First author | Randomization              | Deviations from the intended | Missing outcome data | Measurement of outcome | Selection of the reported  | Other (Competing risks)   |
|------------------------------------------|-----------------------------------------|--------------------------------|--------------|----------------------------|------------------------------|----------------------|------------------------|----------------------------|---------------------------|
| (acetyl)cysteine                         | standard care/placebo                   | 48051                          | Taher        | probably low risk of bias  | low risk of bias             | low risk of bias     | low risk of bias       | probably low risk of bias  | low risk of bias          |
| ACEi/ARB                                 | standard care/placebo                   | Puskarich_inpatien             | Puskarich_2  | low risk of bias           | low risk of bias             | low risk of bias     | low risk of bias       | probably high risk of bias | low risk of bias          |
| epitor antagonists, corticosteroids (sys | standard care/placebo                   | 33303, Rosas                   | Rosas        | low risk of bias           | probably high risk of bias   | low risk of bias     | low risk of bias       | low risk of bias           | low risk of bias          |
|                                          |                                         | 33304, Gordon_v1, Gori         | Gordon_1     | low risk of bias           | probably high risk of bias   | low risk of bias     | low risk of bias       | low risk of bias           | low risk of bias          |
|                                          |                                         | 27470                          | Veiga        | low risk of bias           | probably high risk of bias   | low risk of bias     | low risk of bias       | low risk of bias           | low risk of bias          |
|                                          |                                         | 34439                          | Soin         | probably high risk of bias | probably high risk of bias   | low risk of bias     | low risk of bias       | low risk of bias           | low risk of bias          |
| JAK inhibitors                           | standard care/placebo                   | 62263, Marconi, Marc           | Marconi      | low risk of bias           | low risk of bias             | low risk of bias     | low risk of bias       | low risk of bias           | low risk of bias          |
|                                          |                                         | Ely, WHO_COV-BARRIER_Addendum, | Ely          | low risk of bias           | low risk of bias             | low risk of bias     | low risk of bias       | low risk of bias           | low risk of bias          |
| azithromycin                             | hydroxychloroquine                      | 18375                          | Brown        | low risk of bias           | high risk of bias            | low risk of bias     | low risk of bias       | low risk of bias           | low risk of bias          |
| azithromycin                             | standard care/placebo                   | 12439                          | Furtado      | low risk of bias           | probably high risk of bias   | low risk of bias     | low risk of bias       | low risk of bias           | low risk of bias          |
| corticosteroids (systemic)               | standard care/placebo                   | 12141                          | Tomazini     | low risk of bias           | probably high risk of bias   | low risk of bias     | low risk of bias       | low risk of bias           | low risk of bias          |
| full-dose anticoagulation                | standard care/placebo                   | 13836                          | Lemos        | low risk of bias           | probably high risk of bias   | low risk of bias     | low risk of bias       | low risk of bias           | probably low risk of bias |
|                                          |                                         | 35895, Bikdeli                 | Bikdeli      | low risk of bias           | probably high risk of bias   | low risk of bias     | low risk of bias       | low risk of bias           | low risk of bias          |
|                                          |                                         | Sholzberg                      | Sholzberg    | low risk of bias           | probably high risk of bias   | low risk of bias     | low risk of bias       | low risk of bias           | low risk of bias          |
| ull-dose anticoagulation, thrombolysi    | standard care/placebo                   | 65552_P1                       | Barrett_P1   | low risk of bias           | probably high risk of bias   | low risk of bias     | low risk of bias       | low risk of bias           | low risk of bias          |
|                                          |                                         | 65552_P2                       | Barrett_P2   | low risk of bias           | probably high risk of bias   | low risk of bias     | low risk of bias       | low risk of bias           | low risk of bias          |
| hydroxychloroquine                       | hydroxychloroquine, lopinavir-ritonavir | 52697                          | Arabi        | low risk of bias           | probably high risk of bias   | low risk of bias     | low risk of bias       | probably high risk of bias | low risk of bias          |
| hydroxychloroquine                       | interferon beta, lopinavir-ritonavir    | 45662, Ader_1                  | Ader_1       | low risk of bias           | probably high risk of bias   | low risk of bias     | low risk of bias       | low risk of bias           | low risk of bias          |
| hydroxychloroquine                       | lopinavir-ritonavir                     | 45662, Ader_1                  | Ader_1       | low risk of bias           | probably high risk of bias   | low risk of bias     | low risk of bias       | low risk of bias           | low risk of bias          |
|                                          |                                         | 52697                          | Arabi        | low risk of bias           | probably high risk of bias   | low risk of bias     | low risk of bias       | probably high risk of bias | low risk of bias          |
| hydroxychloroquine                       | standard care/placebo                   | 45662, Ader_1                  | Ader_1       | low risk of bias           | probably high risk of bias   | low risk of bias     | low risk of bias       | low risk of bias           | low risk of bias          |
|                                          |                                         | 41434                          | Réa-Neto     | low risk of bias           | probably high risk of bias   | low risk of bias     | low risk of bias       | low risk of bias           | low risk of bias          |
|                                          |                                         | 52697                          | Arabi        | low risk of bias           | probably high risk of bias   | low risk of bias     | low risk of bias       | probably high risk of bias | low risk of bias          |
| hydroxychloroquine, lopinavir-ritonavi   | lopinavir-ritonavir                     | 52697                          | Arabi        | low risk of bias           | probably high risk of bias   | low risk of bias     | low risk of bias       | probably high risk of bias | low risk of bias          |
| hydroxychloroquine, lopinavir-ritonavi   | standard care/placebo                   | 52697                          | Arabi        | low risk of bias           | probably high risk of bias   | low risk of bias     | low risk of bias       | probably high risk of bias | low risk of bias          |
| interferon beta, lopinavir-ritonavir     | lopinavir-ritonavir                     | 45662, Ader_1                  | Ader_1       | low risk of bias           | probably high risk of bias   | low risk of bias     | low risk of bias       | low risk of bias           | low risk of bias          |
| interferon beta, lopinavir-ritonavir     | standard care/placebo                   | 45662, Ader_1                  | Ader_1       | low risk of bias           | probably high risk of bias   | low risk of bias     | low risk of bias       | low risk of bias           | low risk of bias          |
| lopinavir-ritonavir                      | standard care/placebo                   | 45662, Ader_1                  | Ader_1       | low risk of bias           | probably high risk of bias   | low risk of bias     | low risk of bias       | low risk of bias           | low risk of bias          |
|                                          |                                         | 52697                          | Arabi        | low risk of bias           | probably high risk of bias   | low risk of bias     | low risk of bias       | probably high risk of bias | low risk of bias          |

|                            |                       |                   |         |                            |                            |                  |                  |                            |                  |
|----------------------------|-----------------------|-------------------|---------|----------------------------|----------------------------|------------------|------------------|----------------------------|------------------|
| remdesivir                 | standard care/placebo | Ader (remdesivir) | Ader_2  | low risk of bias           | probably high risk of bias | low risk of bias | low risk of bias | low risk of bias           | low risk of bias |
|                            |                       |                   |         |                            |                            |                  |                  |                            |                  |
| secukinumab                | standard care/placebo | Resende           | Resende | probably high risk of bias | probably high risk of bias | low risk of bias | low risk of bias | low risk of bias           | low risk of bias |
|                            |                       |                   |         |                            |                            |                  |                  |                            |                  |
| tyrosine kinase inhibitors | standard care/placebo | 49287             | Aman    | low risk of bias           | low risk of bias           | low risk of bias | low risk of bias | probably high risk of bias | low risk of bias |
|                            |                       |                   |         |                            |                            |                  |                  |                            |                  |
| vitamin C                  | standard care/placebo | 26123, Zhang      | Zhang_1 | low risk of bias           | low risk of bias           | low risk of bias | low risk of bias | low risk of bias           | low risk of bias |
|                            |                       |                   |         |                            |                            |                  |                  |                            |                  |



|                                   |                       |                                          |                  |                            |                            |                            |                  |                            |                            |
|-----------------------------------|-----------------------|------------------------------------------|------------------|----------------------------|----------------------------|----------------------------|------------------|----------------------------|----------------------------|
|                                   |                       | 11243, 5514, 824:                        | Davoudi-Monfared | low risk of bias           | high risk of bias          | probably high risk of bias | low risk of bias | probably low risk of bias  | probably high risk of bias |
| itraconazole                      | standard care/placebo |                                          |                  |                            |                            |                            |                  |                            |                            |
|                                   |                       | 36093, Liesenborgl                       | Liesenborghs     | probably high risk of bias | probably high risk of bias | low risk of bias           | low risk of bias | probably low risk of bias  | low risk of bias           |
| lopinavir-ritonavir               | standard care/placebo |                                          |                  |                            |                            |                            |                  |                            |                            |
|                                   |                       | 330                                      | Cao_1            | low risk of bias           | probably high risk of bias | low risk of bias           | low risk of bias | low risk of bias           | low risk of bias           |
| mavrilimumab                      | standard care/placebo |                                          |                  |                            |                            |                            |                  |                            |                            |
|                                   |                       | 36763                                    | Cremer_2         | low risk of bias           | low risk of bias           | low risk of bias           | low risk of bias | probably low risk of bias  | low risk of bias           |
| nitric oxide                      | standard care/placebo |                                          |                  |                            |                            |                            |                  |                            |                            |
|                                   |                       | Moni                                     | Moni             | low risk of bias           | probably high risk of bias | probably low risk of bias  | low risk of bias | low risk of bias           | high risk of bias          |
| pyridostigmine                    | standard care/placebo |                                          |                  |                            |                            |                            |                  |                            |                            |
|                                   |                       | Fragoso-Saavedra                         | Fragoso-Saavedra | probably low risk of bias  | low risk of bias           | low risk of bias           | low risk of bias | probably low risk of bias  | low risk of bias           |
| remdesivir                        | standard care/placebo |                                          |                  |                            |                            |                            |                  |                            |                            |
|                                   |                       | 2408                                     | Wang_1           | low risk of bias           | low risk of bias           | low risk of bias           | low risk of bias | low risk of bias           | low risk of bias           |
|                                   |                       | 15633, 3821                              | Beigel           | low risk of bias           | low risk of bias           | low risk of bias           | low risk of bias | low risk of bias           | low risk of bias           |
|                                   |                       | 37778                                    | Mahajan          | high risk of bias          | probably high risk of bias | low risk of bias           | low risk of bias | probably low risk of bias  | low risk of bias           |
| ribavirin, sofosbuvir-daclatasvir | standard care/placebo |                                          |                  |                            |                            |                            |                  |                            |                            |
|                                   |                       | 11010                                    | Kasgari          | low risk of bias           | probably high risk of bias | low risk of bias           | low risk of bias | probably low risk of bias  | low risk of bias           |
| secukinumab                       | standard care/placebo |                                          |                  |                            |                            |                            |                  |                            |                            |
|                                   |                       | Resende                                  | Resende          | probably high risk of bias | probably high risk of bias | low risk of bias           | low risk of bias | probably low risk of bias  | low risk of bias           |
| sildenafil                        | standard care/placebo |                                          |                  |                            |                            |                            |                  |                            |                            |
|                                   |                       | Santamarina                              | Santamarina      | low risk of bias           | low risk of bias           | probably low risk of bias  | low risk of bias | probably low risk of bias  | low risk of bias           |
| siltuxumab                        | standard care/placebo |                                          |                  |                            |                            |                            |                  |                            |                            |
|                                   |                       | COV-AID_NCT04330620;OV-AID_NCT04330638_E |                  | low risk of bias           | probably high risk of bias | low risk of bias           | low risk of bias | low risk of bias           | low risk of bias           |
| tyrosine kinase inhibitors        | standard care/placebo |                                          |                  |                            |                            |                            |                  |                            |                            |
|                                   |                       | 49287                                    | Aman             | low risk of bias           | low risk of bias           | low risk of bias           | low risk of bias | probably high risk of bias | low risk of bias           |
| umifenovir                        | standard care/placebo |                                          |                  |                            |                            |                            |                  |                            |                            |
|                                   |                       | 52841                                    | Darazam_3        | low risk of bias           | probably high risk of bias | low risk of bias           | low risk of bias | probably low risk of bias  | low risk of bias           |
| vitamin C                         | standard care/placebo |                                          |                  |                            |                            |                            |                  |                            |                            |
|                                   |                       | 26123, Zhang                             | Zhang_1          | low risk of bias           | low risk of bias           | low risk of bias           | low risk of bias | probably low risk of bias  | low risk of bias           |
| vitamin D                         | standard care/placebo |                                          |                  |                            |                            |                            |                  |                            |                            |
|                                   |                       | 18947, 31936                             | Murai            | probably low risk of bias  | low risk of bias           | low risk of bias           | low risk of bias | low risk of bias           | low risk of bias           |

| Time to Symptom Resolution/Clinical Improvement |                                          |                                 |               |                            |                              |                      |                        |                            |                           |
|-------------------------------------------------|------------------------------------------|---------------------------------|---------------|----------------------------|------------------------------|----------------------|------------------------|----------------------------|---------------------------|
| Treatment 1                                     | Treatment 2                              | Trial                           | First author  | Randomization              | Deviations from the intended | Missing outcome data | Measurement of outcome | Selection of the reported  | Other (Competing risks)   |
| 2-deoxy-D-glucose                               | standard care/placebo                    | 66751a                          | Narayan Bhatt | probably high risk of bias | high risk of bias            | low risk of bias     | high risk of bias      | low risk of bias           | probably low risk of bias |
|                                                 |                                          | 66751b                          | Narayan Bhatt | probably high risk of bias | high risk of bias            | low risk of bias     | high risk of bias      | low risk of bias           | probably low risk of bias |
| 5-alpha reductase inhibitor                     | standard care/placebo                    | 19047, 33978, Cadegiani, Cadegi | Cadegiani_1   | probably low risk of bias  | low risk of bias             | high risk of bias    | low risk of bias       | probably low risk of bias  | low risk of bias          |
|                                                 |                                          |                                 |               |                            |                              |                      |                        |                            |                           |
| AXL inhibitor                                   | standard care/placebo                    | Wilkinson                       | Wilkinson     | low risk of bias           | probably high risk of bias   | low risk of bias     | high risk of bias      | low risk of bias           | probably low risk of bias |
| GM-CSF inhibitor                                | standard care/placebo                    | Patel_2                         | Patel_2       | probably low risk of bias  | low risk of bias             | low risk of bias     | low risk of bias       | low risk of bias           | low risk of bias          |
|                                                 |                                          | 41974                           | Temesgen      | probably low risk of bias  | low risk of bias             | low risk of bias     | low risk of bias       | probably high risk of bias | low risk of bias          |
|                                                 |                                          | 47226a                          | Fisher_1      | low risk of bias           | probably high risk of bias   | low risk of bias     | high risk of bias      | probably low risk of bias  | low risk of bias          |
| IL1 inhibitors                                  | standard care/placebo                    | 25655                           | Cremer_1      | probably low risk of bias  | low risk of bias             | low risk of bias     | low risk of bias       | probably low risk of bias  | low risk of bias          |
|                                                 |                                          | 54072                           | Caricchio     | low risk of bias           | low risk of bias             | low risk of bias     | low risk of bias       | low risk of bias           | low risk of bias          |
| IL6 receptor antagonists                        | standard care/placebo                    | 11850                           | Wang_4        | probably high risk of bias | probably high risk of bias   | low risk of bias     | high risk of bias      | probably low risk of bias  | probably low risk of bias |
|                                                 |                                          | 16283                           | Stone         | probably low risk of bias  | low risk of bias             | low risk of bias     | low risk of bias       | low risk of bias           | low risk of bias          |
|                                                 |                                          | Talaschian                      | Talaschian    | probably low risk of bias  | low risk of bias             | low risk of bias     | low risk of bias       | low risk of bias           | low risk of bias          |
| eptor antagonists, corticosteroids (sys         | standard care/placebo                    | 33303, Rosas                    | Rosas         | low risk of bias           | probably high risk of bias   | low risk of bias     | low risk of bias       | low risk of bias           | low risk of bias          |
|                                                 |                                          | 16340, 23643                    | Salama        | probably low risk of bias  | low risk of bias             | low risk of bias     | low risk of bias       | low risk of bias           | low risk of bias          |
|                                                 |                                          | 29298, 34438                    | Lescure       | low risk of bias           | low risk of bias             | low risk of bias     | low risk of bias       | low risk of bias           | low risk of bias          |
|                                                 |                                          | 34439                           | Soin          | probably high risk of bias | probably high risk of bias   | low risk of bias     | low risk of bias       | low risk of bias           | low risk of bias          |
| JAK inhibitors                                  | standard care/placebo                    | 4161                            | Cao_2         | low risk of bias           | probably high risk of bias   | low risk of bias     | low risk of bias       | probably low risk of bias  | low risk of bias          |
|                                                 |                                          | Kalil                           | Kalil         | low risk of bias           | low risk of bias             | low risk of bias     | low risk of bias       | low risk of bias           | low risk of bias          |
|                                                 |                                          | 62263, Marconi, Marcu           | Marconi       | low risk of bias           | low risk of bias             | low risk of bias     | low risk of bias       | low risk of bias           | low risk of bias          |
|                                                 |                                          | RUXCOVID                        | RUXCOVID      | low risk of bias           | low risk of bias             | low risk of bias     | low risk of bias       | low risk of bias           | low risk of bias          |
|                                                 |                                          | Ely, WHO_COV-BARRIER_Addendum,  | Ely           | low risk of bias           | low risk of bias             | low risk of bias     | low risk of bias       | low risk of bias           | low risk of bias          |
| rate, N-acetylcysteine, nicotinamide r          | standard care/placebo                    | 14670                           | Altay         | probably high risk of bias | probably high risk of bias   | low risk of bias     | high risk of bias      | probably low risk of bias  | low risk of bias          |
| NSAID, azithromycin                             | NSAID, azithromycin, corticosteroid      | 64198                           | Ghanei        | low risk of bias           | probably high risk of bias   | low risk of bias     | high risk of bias      | probably low risk of bias  | low risk of bias          |
| NSAID, azithromycin                             | lopinavir-ritonavir                      | 64198                           | Ghanei        | low risk of bias           | probably high risk of bias   | low risk of bias     | high risk of bias      | probably low risk of bias  | low risk of bias          |
| NSAID, azithromycin, corticosteroid             | lopinavir-ritonavir                      | 64198                           | Ghanei        | low risk of bias           | probably high risk of bias   | low risk of bias     | high risk of bias      | probably low risk of bias  | low risk of bias          |
| NSAIDs                                          | paracetamol                              | Ravichandran                    | Ravichandran  | probably high risk of bias | probably high risk of bias   | low risk of bias     | high risk of bias      | low risk of bias           | low risk of bias          |
| TNF inhibitors                                  | standard care/placebo                    | 47226b                          | Fisher_2      | low risk of bias           | probably high risk of bias   | high risk of bias    | high risk of bias      | probably low risk of bias  | low risk of bias          |
|                                                 |                                          |                                 |               |                            |                              |                      |                        |                            |                           |
| antihepaciviral                                 | romycin, hydroxychloroquine, oseltamivir | 44111                           | Elgohary      | low risk of bias           | probably high risk of bias   | low risk of bias     | high risk of bias      | probably high risk of bias | low risk of bias          |
| antihepaciviral                                 | standard care/placebo                    | 11065                           | Sadeghi       | probably high risk of bias | high risk of bias            | low risk of bias     | low risk of bias       | probably high risk of bias | low risk of bias          |
|                                                 |                                          | Yakoot                          | Yakoot        | low risk of bias           | probably high risk of bias   | low risk of bias     | low risk of bias       | low risk of bias           | low risk of bias          |
|                                                 |                                          | 29517                           | Nourian       | low risk of bias           | high risk of bias            | low risk of bias     | low risk of bias       | probably low risk of bias  | low risk of bias          |
|                                                 |                                          | 45668                           | Sayad         | low risk of bias           | probably high risk of bias   | low risk of bias     | low risk of bias       | probably low risk of bias  | low risk of bias          |
| artemisinin                                     | standard care/placebo                    |                                 |               |                            |                              |                      |                        |                            |                           |

|                                       |                       |                   |                            |                            |                            |                           |                           |                            |                            |
|---------------------------------------|-----------------------|-------------------|----------------------------|----------------------------|----------------------------|---------------------------|---------------------------|----------------------------|----------------------------|
|                                       |                       |                   | Trieu                      | probably high risk of bias | probably high risk of bias | low risk of bias          | high risk of bias         | low risk of bias           | low risk of bias           |
| azithromycin                          | clarithromycin        | 58017             | Rashad_1                   | low risk of bias           | probably high risk of bias | low risk of bias          | low risk of bias          | probably high risk of bias | low risk of bias           |
| azithromycin                          | hydroxychloroquine    | 18375             | Brown                      | low risk of bias           | high risk of bias          | low risk of bias          | low risk of bias          | low risk of bias           | low risk of bias           |
| azithromycin                          | standard care/placebo | 34434             | IPLE Trial Collaborative G | low risk of bias           | probably high risk of bias | low risk of bias          | high risk of bias         | low risk of bias           | low risk of bias           |
|                                       |                       | 58017             | Rashad_1                   | low risk of bias           | probably high risk of bias | low risk of bias          | low risk of bias          | probably high risk of bias | low risk of bias           |
| azithromycin, hydroxychloroquine      | hydroxychloroquine    | 33489, Johnston   | Johnston                   | probably low risk of bias  | low risk of bias           | low risk of bias          | low risk of bias          | probably low risk of bias  | low risk of bias           |
| azithromycin, hydroxychloroquine      | standard care/placebo | 33489, Johnston   | Johnston                   | probably low risk of bias  | low risk of bias           | low risk of bias          | low risk of bias          | probably low risk of bias  | low risk of bias           |
| baloxavir marboxil                    | favipiravir           | 2637, Lou, Lou (1 | Lou                        | low risk of bias           | probably high risk of bias | low risk of bias          | high risk of bias         | probably low risk of bias  | low risk of bias           |
| baloxavir marboxil                    | standard care/placebo | 2637, Lou, Lou (1 | Lou                        | low risk of bias           | probably high risk of bias | low risk of bias          | high risk of bias         | probably low risk of bias  | low risk of bias           |
| bromhexine hydrochloride              | hydroxychloroquine    | 12212             | Li_3                       | low risk of bias           | probably high risk of bias | low risk of bias          | high risk of bias         | high risk of bias          | probably low risk of bias  |
|                                       |                       | 12212             | Li_3                       | low risk of bias           | probably high risk of bias | low risk of bias          | high risk of bias         | high risk of bias          | probably low risk of bias  |
|                                       |                       | 27338a (moderate  | Li_3                       | probably high risk of bias | probably high risk of bias | low risk of bias          | low risk of bias          | low risk of bias           | probably low risk of bias  |
|                                       |                       | 27338a (moderate  | Li_3                       | probably high risk of bias | probably high risk of bias | low risk of bias          | low risk of bias          | low risk of bias           | probably low risk of bias  |
|                                       |                       | 27338b (severe)   | Li_3                       | probably high risk of bias | probably high risk of bias | high risk of bias         | low risk of bias          | low risk of bias           | probably low risk of bias  |
|                                       |                       | 27338b (severe)   | Li_3                       | probably high risk of bias | probably high risk of bias | high risk of bias         | low risk of bias          | low risk of bias           | probably low risk of bias  |
| bromhexine hydrochloride              | standard care/placebo | 12212             | Li_3                       | low risk of bias           | probably high risk of bias | low risk of bias          | high risk of bias         | high risk of bias          | probably low risk of bias  |
|                                       |                       | 27338a (moderate  | Li_3                       | probably high risk of bias | probably high risk of bias | low risk of bias          | low risk of bias          | low risk of bias           | probably low risk of bias  |
|                                       |                       | 27338b (severe)   | Li_3                       | probably high risk of bias | probably high risk of bias | high risk of bias         | low risk of bias          | low risk of bias           | probably low risk of bias  |
|                                       |                       | 35697             | Tolouian                   | probably high risk of bias | probably high risk of bias | probably low risk of bias | low risk of bias          | probably low risk of bias  | low risk of bias           |
| cium release-activated calcium inhibi | mupadolimab           | 10964             | Miller                     | probably high risk of bias | high risk of bias          | low risk of bias          | low risk of bias          | probably high risk of bias | low risk of bias           |
|                                       |                       | Miller            | Miller                     | probably low risk of bias  | low risk of bias           | low risk of bias          | probably low risk of bias | probably low risk of bias  | low risk of bias           |
| cium release-activated calcium inhibi | standard care/placebo | 10964             | Miller                     | probably high risk of bias | high risk of bias          | low risk of bias          | low risk of bias          | probably high risk of bias | low risk of bias           |
|                                       |                       | 10964             | Miller                     | probably high risk of bias | high risk of bias          | low risk of bias          | low risk of bias          | probably high risk of bias | low risk of bias           |
|                                       |                       | Miller            | Miller                     | probably low risk of bias  | low risk of bias           | low risk of bias          | probably low risk of bias | probably low risk of bias  | low risk of bias           |
|                                       |                       | Miller            | Miller                     | probably low risk of bias  | low risk of bias           | low risk of bias          | probably low risk of bias | probably low risk of bias  | low risk of bias           |
| cannabidiol                           | standard care/placebo | 66954             | Crippa                     | probably low risk of bias  | low risk of bias           | low risk of bias          | low risk of bias          | low risk of bias           | low risk of bias           |
| cefepime                              | ceftazidime           | 70011             | Eid                        | probably high risk of bias | probably high risk of bias | low risk of bias          | high risk of bias         | probably low risk of bias  | low risk of bias           |
| cefepime                              | standard care/placebo | 70011             | Eid                        | probably high risk of bias | probably high risk of bias | low risk of bias          | high risk of bias         | probably low risk of bias  | low risk of bias           |
| ceftazidime                           | standard care/placebo | 70011             | Eid                        | probably high risk of bias | probably high risk of bias | low risk of bias          | high risk of bias         | probably low risk of bias  | low risk of bias           |
| clarithromycin                        | standard care/placebo | 58017             | Rashad_1                   | low risk of bias           | probably high risk of bias | low risk of bias          | low risk of bias          | probably high risk of bias | low risk of bias           |
| colchicine                            | standard care/placebo | 64351             | Dorward                    | low risk of bias           | probably high risk of bias | low risk of bias          | high risk of bias         | low risk of bias           | low risk of bias           |
|                                       |                       | 64385             | Pascual-Figal              | low risk of bias           | probably high risk of bias | low risk of bias          | low risk of bias          | probably low risk of bias  | probably high risk of bias |

|                                        |                                      |                       |                    |                            |                            |                            |                            |                            |                            |
|----------------------------------------|--------------------------------------|-----------------------|--------------------|----------------------------|----------------------------|----------------------------|----------------------------|----------------------------|----------------------------|
| corticosteroids (systemic)             | standard care/placebo                | 13208                 | Edalatifard        | probably high risk of bias | probably high risk of bias | probably high risk of bias | probably low risk of bias  | probably low risk of bias  | low risk of bias           |
|                                        |                                      | 27643                 | Tang_2             | probably low risk of bias  | probably high risk of bias | low risk of bias           | low risk of bias           | probably low risk of bias  | probably high risk of bias |
| corticosteroids (systemic), tacrolimus | standard care/placebo                | 51435                 | Solanich           | probably high risk of bias | probably high risk of bias | low risk of bias           | low risk of bias           | low risk of bias           | low risk of bias           |
| doxycycline                            | standard care/placebo                | 55459, Butler_doxycly | Butler             | low risk of bias           | probably high risk of bias | low risk of bias           | high risk of bias          | low risk of bias           | probably low risk of bias  |
| doxycycline, ivermectin                | standard care/placebo                | 43517                 | Mahmud             | low risk of bias           | low risk of bias           | low risk of bias           | low risk of bias           | low risk of bias           | low risk of bias           |
| electrolyzed saline                    | standard care/placebo                | 13074, 53789          | Delgado-Enciso     | probably high risk of bias | probably high risk of bias | low risk of bias           | high risk of bias          | probably low risk of bias  | low risk of bias           |
| enisamium                              | standard care/placebo                | 26217                 | Holubovska         | probably low risk of bias  | low risk of bias           | low risk of bias           | low risk of bias           | low risk of bias           | low risk of bias           |
| favipiravir                            | lopinavir-ritonavir                  | 35903                 | Solaymani-Dodaran  | low risk of bias           | probably high risk of bias | low risk of bias           | low risk of bias           | low risk of bias           | probably low risk of bias  |
| favipiravir                            | standard care/placebo                | 2637, Lou, Lou (1     | Lou                | low risk of bias           | probably high risk of bias | low risk of bias           | high risk of bias          | probably low risk of bias  | low risk of bias           |
|                                        |                                      | 10147, 10287, 997     | Ivashchenko        | probably high risk of bias | high risk of bias          | low risk of bias           | high risk of bias          | low risk of bias           | low risk of bias           |
|                                        |                                      | 32588                 | Ruzhentsova        | probably high risk of bias | probably high risk of bias | low risk of bias           | high risk of bias          | low risk of bias           | probably low risk of bias  |
|                                        |                                      | 24988, Udwadia        | Udwadia            | probably high risk of bias | probably high risk of bias | low risk of bias           | high risk of bias          | low risk of bias           | low risk of bias           |
|                                        |                                      | 27459                 | Balykova_1         | probably high risk of bias | high risk of bias          | low risk of bias           | high risk of bias          | probably low risk of bias  | low risk of bias           |
|                                        |                                      | 32586                 | Balykova_2         | low risk of bias           | probably high risk of bias | low risk of bias           | high risk of bias          | low risk of bias           | low risk of bias           |
| favipiravir                            | umifenovir                           | 173                   | Chen_2             | probably high risk of bias | probably high risk of bias | low risk of bias           | high risk of bias          | low risk of bias           | low risk of bias           |
| favipiravir, hydrochloroquine          | standard care/placebo                | Bosaeed               | Bosaeed            | low risk of bias           | probably high risk of bias | low risk of bias           | high risk of bias          | low risk of bias           | low risk of bias           |
| flvoxamine                             | standard care/placebo                | 70784, Reis_2         | Reis_2             | low risk of bias           | low risk of bias           | low risk of bias           | low risk of bias           | low risk of bias           | probably low risk of bias  |
| hydrogen peroxide                      | standard care/placebo                | 64234                 | Di Domenico        | low risk of bias           | low risk of bias           | low risk of bias           | low risk of bias           | low risk of bias           | probably low risk of bias  |
| hydroxychloroquine                     | interferon beta, lopinavir-ritonavir | 45662, Ader_1         | Ader_1             | low risk of bias           | probably high risk of bias | low risk of bias           | high risk of bias          | low risk of bias           | low risk of bias           |
| hydroxychloroquine                     | lopinavir-ritonavir                  | pilot_4               | Huang_1            | probably high risk of bias | probably high risk of bias | low risk of bias           | high risk of bias          | probably low risk of bias  | probably low risk of bias  |
|                                        |                                      | 45662, Ader_1         | Ader_1             | low risk of bias           | probably high risk of bias | low risk of bias           | high risk of bias          | low risk of bias           | low risk of bias           |
| hydroxychloroquine                     | standard care/placebo                | 434                   | Chen_1             | probably low risk of bias  | low risk of bias           | low risk of bias           | low risk of bias           | probably low risk of bias  | probably low risk of bias  |
|                                        |                                      | 3321, 776             | Tang_1             | low risk of bias           | probably high risk of bias | low risk of bias           | high risk of bias          | low risk of bias           | low risk of bias           |
|                                        |                                      | C158                  | Chen_3             | probably high risk of bias | probably high risk of bias | low risk of bias           | high risk of bias          | probably low risk of bias  | low risk of bias           |
|                                        |                                      | 6987                  | Chen_4             | probably high risk of bias | probably high risk of bias | high risk of bias          | high risk of bias          | probably low risk of bias  | low risk of bias           |
|                                        |                                      | 11299                 | Abd-Elsalam_1      | probably high risk of bias | probably high risk of bias | low risk of bias           | probably high risk of bias | probably low risk of bias  | low risk of bias           |
|                                        |                                      | 12212                 | Li_3               | low risk of bias           | probably high risk of bias | low risk of bias           | high risk of bias          | high risk of bias          | probably low risk of bias  |
|                                        |                                      | 12212                 | Li_3               | low risk of bias           | probably high risk of bias | low risk of bias           | high risk of bias          | high risk of bias          | probably low risk of bias  |
|                                        |                                      | 18245, 23358          | Self               | low risk of bias           | low risk of bias           | low risk of bias           | low risk of bias           | low risk of bias           | low risk of bias           |
|                                        |                                      | 33489, Johnston       | Johnston           | probably low risk of bias  | low risk of bias           | low risk of bias           | low risk of bias           | probably low risk of bias  | low risk of bias           |
|                                        |                                      | 45662, Ader_1         | Ader_1             | low risk of bias           | probably high risk of bias | low risk of bias           | high risk of bias          | low risk of bias           | low risk of bias           |
|                                        |                                      | 29663                 | Hernandez-Cardenas | low risk of bias           | low risk of bias           | low risk of bias           | low risk of bias           | probably high risk of bias | low risk of bias           |
|                                        |                                      | 27338a (moderate      | Li_3               | probably high risk of bias | probably high risk of bias | low risk of bias           | low risk of bias           | low risk of bias           | probably low risk of bias  |
|                                        |                                      | 27338a (moderate      | Li_3               | probably high risk of bias | probably high risk of bias | low risk of bias           | low risk of bias           | low risk of bias           | probably low risk of bias  |
|                                        |                                      | 27338b (severe)       | Li_3               | probably high risk of bias | probably high risk of bias | high risk of bias          | low risk of bias           | low risk of bias           | probably low risk of bias  |
|                                        |                                      | 27338b (severe)       | Li_3               | probably high risk of bias | probably high risk of bias | high risk of bias          | low risk of bias           | low risk of bias           | probably low risk of bias  |
|                                        |                                      | 33028                 | Amaravadi          | low risk of bias           | low risk of bias           | low risk of bias           | low risk of bias           | probably low risk of bias  | low risk of bias           |
|                                        |                                      | Byakika-Kibwika       | Byakika-Kibwika    | low risk of bias           | probably high risk of bias | low risk of bias           | probably high risk of bias | low risk of bias           | probably low risk of bias  |

|                                         |                                      |                                                                      |                                                       |                                                                                                            |                                                                                                            |                                                                                                           |                                                                                                   |                                                                                                                    |                                                                                                                     |
|-----------------------------------------|--------------------------------------|----------------------------------------------------------------------|-------------------------------------------------------|------------------------------------------------------------------------------------------------------------|------------------------------------------------------------------------------------------------------------|-----------------------------------------------------------------------------------------------------------|---------------------------------------------------------------------------------------------------|--------------------------------------------------------------------------------------------------------------------|---------------------------------------------------------------------------------------------------------------------|
|                                         |                                      | Schwartz_2                                                           | Schwartz_2                                            | low risk of bias                                                                                           | low risk of bias                                                                                           | low risk of bias                                                                                          | low risk of bias                                                                                  | low risk of bias                                                                                                   | low risk of bias                                                                                                    |
| hydroxychloroquine, lopinavir-ritonavir | hydroxychloroquine, umifenovir       | 23259, 8                                                             | Nojomi                                                | low risk of bias                                                                                           | probably high risk of bias                                                                                 | low risk of bias                                                                                          | high risk of bias                                                                                 | probably low risk of bias                                                                                          | low risk of bias                                                                                                    |
| inhaled corticosteroids                 | standard care/placebo                | 29771, 38831<br>57300, Yu                                            | Ramakrishnan<br>Yu                                    | probably high risk of bias<br>probably low risk of bias                                                    | probably high risk of bias<br>probably high risk of bias                                                   | low risk of bias<br>low risk of bias                                                                      | high risk of bias<br>high risk of bias                                                            | probably low risk of bias<br>low risk of bias                                                                      | probably low risk of bias<br>probably low risk of bias                                                              |
| inhaled nebulised interferon beta-1a    | standard care/placebo                | 18657                                                                | Monk                                                  | low risk of bias                                                                                           | low risk of bias                                                                                           | high risk of bias                                                                                         | high risk of bias                                                                                 | low risk of bias                                                                                                   | low risk of bias                                                                                                    |
| interferon alpha                        | combinant super combinant interferon | 32737, 7, 9574                                                       | Li_2                                                  | probably high risk of bias                                                                                 | probably high risk of bias                                                                                 | low risk of bias                                                                                          | high risk of bias                                                                                 | low risk of bias                                                                                                   | low risk of bias                                                                                                    |
| interferon alpha                        | standard care/placebo                | 59366, 60209                                                         | Bhushan                                               | probably high risk of bias                                                                                 | probably high risk of bias                                                                                 | low risk of bias                                                                                          | high risk of bias                                                                                 | probably high risk of bias                                                                                         | probably high risk of bias                                                                                          |
| interferon beta                         | standard care/placebo                | 11541, 11937<br>39381, Darazam (2<br>Kalil_2<br>11243, 5514, 824:    | Rahmani<br>Darazam_2<br>Kalil_2<br>Davoudi-Monfared   | probably high risk of bias<br>low risk of bias<br>low risk of bias<br>low risk of bias                     | probably high risk of bias<br>probably high risk of bias<br>low risk of bias<br>high risk of bias          | high risk of bias<br>low risk of bias<br>low risk of bias<br>probably high risk of bias                   | low risk of bias<br>low risk of bias<br>low risk of bias<br>low risk of bias                      | probably low risk of bias<br>low risk of bias<br>low risk of bias<br>probably low risk of bias                     | low risk of bias<br>low risk of bias<br>low risk of bias<br>probably high risk of bias                              |
| interferon beta, lopinavir-ritonavir    | lopinavir-ritonavir                  | 45662, Ader_1                                                        | Ader_1                                                | low risk of bias                                                                                           | probably high risk of bias                                                                                 | low risk of bias                                                                                          | high risk of bias                                                                                 | low risk of bias                                                                                                   | low risk of bias                                                                                                    |
| interferon beta, lopinavir-ritonavir    | sofosbuvir                           | Mostafa                                                              | Alavi-Moghaddam                                       | probably high risk of bias                                                                                 | probably high risk of bias                                                                                 | low risk of bias                                                                                          | low risk of bias                                                                                  | probably low risk of bias                                                                                          | low risk of bias                                                                                                    |
| interferon beta, lopinavir-ritonavir    | standard care/placebo                | 45662, Ader_1                                                        | Ader_1                                                | low risk of bias                                                                                           | probably high risk of bias                                                                                 | low risk of bias                                                                                          | high risk of bias                                                                                 | low risk of bias                                                                                                   | low risk of bias                                                                                                    |
| interferon beta, ribavirin              | standard care/placebo                | 2942                                                                 | Hung                                                  | probably high risk of bias                                                                                 | probably high risk of bias                                                                                 | low risk of bias                                                                                          | high risk of bias                                                                                 | low risk of bias                                                                                                   | low risk of bias                                                                                                    |
| intranasal corticosteroids              | standard care/placebo                | Clemency                                                             | Clemency                                              | low risk of bias                                                                                           | low risk of bias                                                                                           | low risk of bias                                                                                          | low risk of bias                                                                                  | low risk of bias                                                                                                   | low risk of bias                                                                                                    |
| itraconazole                            | standard care/placebo                | 36093, Liesenborgl                                                   | Liesenborghs                                          | probably high risk of bias                                                                                 | probably high risk of bias                                                                                 | low risk of bias                                                                                          | high risk of bias                                                                                 | probably low risk of bias                                                                                          | low risk of bias                                                                                                    |
| ivermectin                              | standard care/placebo                | Abdulmir_Rezai<br>Mohan<br>34416, 41159, Lopi<br>Chahla<br>Buonfrate | Rezai<br>Mohan<br>Lopez-Medina<br>Chahla<br>Buonfrate | low risk of bias<br>low risk of bias<br>low risk of bias<br>probably high risk of bias<br>low risk of bias | low risk of bias<br>low risk of bias<br>low risk of bias<br>probably high risk of bias<br>low risk of bias | probably low risk of bias<br>low risk of bias<br>low risk of bias<br>low risk of bias<br>low risk of bias | low risk of bias<br>low risk of bias<br>low risk of bias<br>high risk of bias<br>low risk of bias | probably low risk of bias<br>low risk of bias<br>low risk of bias<br>probably low risk of bias<br>low risk of bias | probably high risk of bias<br>low risk of bias<br>low risk of bias<br>low risk of bias<br>probably low risk of bias |
| ivermectin nasal spray                  | standard care/placebo                | 49942                                                                | Aref                                                  | probably high risk of bias                                                                                 | probably high risk of bias                                                                                 | low risk of bias                                                                                          | low risk of bias                                                                                  | probably high risk of bias                                                                                         | probably low risk of bias                                                                                           |
| leflunomide                             | standard care/placebo                | 8784                                                                 | Hu                                                    | probably high risk of bias                                                                                 | probably high risk of bias                                                                                 | low risk of bias                                                                                          | high risk of bias                                                                                 | low risk of bias                                                                                                   | low risk of bias                                                                                                    |
| lopinavir-ritonavir                     | standard care/placebo                | 330<br>45662, Ader_1                                                 | Cao_1<br>Ader_1                                       | low risk of bias<br>low risk of bias                                                                       | probably high risk of bias<br>probably high risk of bias                                                   | low risk of bias<br>low risk of bias                                                                      | high risk of bias<br>high risk of bias                                                            | probably low risk of bias<br>low risk of bias                                                                      | low risk of bias<br>low risk of bias                                                                                |
| lopinavir-ritonavir, ribavirin          | ribavirin                            | 10067, 2615                                                          | Huang_2                                               | probably high risk of bias                                                                                 | probably high risk of bias                                                                                 | low risk of bias                                                                                          | high risk of bias                                                                                 | probably low risk of bias                                                                                          | low risk of bias                                                                                                    |
| mavrilimumab                            | standard care/placebo                | 36763                                                                | Cremer_2                                              | low risk of bias                                                                                           | low risk of bias                                                                                           | low risk of bias                                                                                          | low risk of bias                                                                                  | low risk of bias                                                                                                   | low risk of bias                                                                                                    |
| melatonin                               | standard care/placebo                | Farnoosh                                                             | Farnoosh                                              | probably low risk of bias                                                                                  | low risk of bias                                                                                           | high risk of bias                                                                                         | low risk of bias                                                                                  | probably high risk of bias                                                                                         | low risk of bias                                                                                                    |

|                                         |                                           |                               |                      |                            |                            |                           |                           |                            |                           |
|-----------------------------------------|-------------------------------------------|-------------------------------|----------------------|----------------------------|----------------------------|---------------------------|---------------------------|----------------------------|---------------------------|
| molnupiravir                            | standard care/placebo                     | CR216-21                      | Vyas                 | low risk of bias           | probably high risk of bias | low risk of bias          | low risk of bias          | low risk of bias           | low risk of bias          |
|                                         |                                           | CTRI/2021/06/0339             | Krishnan             | low risk of bias           | probably high risk of bias | probably low risk of bias | low risk of bias          | low risk of bias           | low risk of bias          |
|                                         |                                           | HCR/III/MOLCOV/04/20          | Kumar_2              | probably high risk of bias | probably high risk of bias | low risk of bias          | high risk of bias         | probably low risk of bias  | low risk of bias          |
| mupadolimab                             | standard care/placebo                     | 10964                         | Miller               | probably high risk of bias | high risk of bias          | low risk of bias          | low risk of bias          | probably high risk of bias | low risk of bias          |
|                                         |                                           | 10964                         | Miller               | probably high risk of bias | high risk of bias          | low risk of bias          | low risk of bias          | probably high risk of bias | low risk of bias          |
|                                         |                                           | Miller                        | Miller               | probably low risk of bias  | low risk of bias           | low risk of bias          | probably low risk of bias | probably low risk of bias  | low risk of bias          |
|                                         |                                           | Miller                        | Miller               | probably low risk of bias  | low risk of bias           | low risk of bias          | probably low risk of bias | probably low risk of bias  | low risk of bias          |
| nanocurcimin                            | standard care/placebo                     | 49064                         | Ahmadi               | low risk of bias           | low risk of bias           | low risk of bias          | low risk of bias          | low risk of bias           | probably low risk of bias |
|                                         |                                           |                               |                      |                            |                            |                           |                           |                            |                           |
| niclosamide                             | standard care/placebo                     | Abdulmir_2                    | Abdulmir_2           | probably high risk of bias | probably high risk of bias | low risk of bias          | high risk of bias         | low risk of bias           | probably low risk of bias |
|                                         |                                           |                               |                      |                            |                            |                           |                           |                            |                           |
| nitazoxanide                            | standard care/placebo                     | Rossignol                     | Rossignol            | low risk of bias           | low risk of bias           | low risk of bias          | low risk of bias          | low risk of bias           | low risk of bias          |
|                                         |                                           |                               |                      |                            |                            |                           |                           |                            |                           |
| nitric oxide                            | standard care/placebo                     | Moni                          | Moni                 | low risk of bias           | probably high risk of bias | probably low risk of bias | low risk of bias          | probably low risk of bias  | low risk of bias          |
|                                         |                                           |                               |                      |                            |                            |                           |                           |                            |                           |
| opaganib                                | standard care/placebo                     | Winthrop                      | Winthrop             | low risk of bias           | low risk of bias           | low risk of bias          | low risk of bias          | low risk of bias           | low risk of bias          |
|                                         |                                           |                               |                      |                            |                            |                           |                           |                            |                           |
| peginterferon lambda                    | standard care/placebo                     | 19514, Jagannathan, Jagannath | Jagannathan          | low risk of bias           | probably low risk of bias  | low risk of bias          | low risk of bias          | low risk of bias           | probably low risk of bias |
|                                         |                                           |                               |                      |                            |                            |                           |                           |                            |                           |
| probiotics                              | standard care/placebo                     | 44556                         | Gutiérrez-Castrellón | low risk of bias           | low risk of bias           | low risk of bias          | low risk of bias          | low risk of bias           | low risk of bias          |
|                                         |                                           |                               |                      |                            |                            |                           |                           |                            |                           |
| progesterone                            | standard care/placebo                     | 32075, Ghandehai              | Ghandehari           | probably high risk of bias | probably high risk of bias | low risk of bias          | low risk of bias          | low risk of bias           | probably low risk of bias |
|                                         |                                           |                               |                      |                            |                            |                           |                           |                            |                           |
| proxalutamide                           | standard care/placebo                     | 33610                         | Cadegiani_3          | high risk of bias          | low risk of bias           | low risk of bias          | low risk of bias          | probably low risk of bias  | probably low risk of bias |
|                                         |                                           |                               |                      |                            |                            |                           |                           |                            |                           |
| nt human granulocyte colony-stimula     | standard care/placebo                     | 12705                         | Cheng                | low risk of bias           | probably high risk of bias | low risk of bias          | low risk of bias          | low risk of bias           | low risk of bias          |
|                                         |                                           |                               |                      |                            |                            |                           |                           |                            |                           |
| remdesivir                              | standard care/placebo                     | 2408                          | Wang_1               | low risk of bias           | low risk of bias           | low risk of bias          | low risk of bias          | low risk of bias           | low risk of bias          |
|                                         |                                           | 11347                         | Spinner              | low risk of bias           | high risk of bias          | probably low risk of bias | low risk of bias          | low risk of bias           | low risk of bias          |
|                                         |                                           | 15633, 3821                   | Beigel               | low risk of bias           | low risk of bias           | low risk of bias          | low risk of bias          | low risk of bias           | low risk of bias          |
|                                         |                                           | Ader (remdesivir)             | Ader_2               | low risk of bias           | probably high risk of bias | low risk of bias          | low risk of bias          | probably low risk of bias  | low risk of bias          |
| saline irrigation                       | saline irrigation, surfactant             | 16351, 6                      | Kimura               | probably high risk of bias | probably high risk of bias | high risk of bias         | high risk of bias         | low risk of bias           | probably low risk of bias |
|                                         |                                           |                               |                      |                            |                            |                           |                           |                            |                           |
| saline irrigation                       | line irrigation, triamcinolone acetoneide | 52585                         | Yildiz               | probably high risk of bias | probably high risk of bias | low risk of bias          | high risk of bias         | probably low risk of bias  | low risk of bias          |
|                                         |                                           |                               |                      |                            |                            |                           |                           |                            |                           |
| saline irrigation                       | standard care/placebo                     | 16351, 6                      | Kimura               | probably high risk of bias | probably high risk of bias | high risk of bias         | high risk of bias         | low risk of bias           | probably low risk of bias |
|                                         |                                           | 52585                         | Yildiz               | probably high risk of bias | probably high risk of bias | low risk of bias          | high risk of bias         | probably low risk of bias  | low risk of bias          |
| saline irrigation, surfactant           | standard care/placebo                     | 16351, 6                      | Kimura               | probably high risk of bias | probably high risk of bias | high risk of bias         | high risk of bias         | low risk of bias           | probably low risk of bias |
|                                         |                                           |                               |                      |                            |                            |                           |                           |                            |                           |
| line irrigation, triamcinolone acetonic | standard care/placebo                     | 52585                         | Yildiz               | probably high risk of bias | probably high risk of bias | low risk of bias          | high risk of bias         | probably low risk of bias  | low risk of bias          |
|                                         |                                           |                               |                      |                            |                            |                           |                           |                            |                           |
| serine protease inhibitors              | standard care/placebo                     | 40853                         | Gunst                | low risk of bias           | low risk of bias           | low risk of bias          | low risk of bias          | low risk of bias           | low risk of bias          |
|                                         |                                           | 70176                         | Zhuravel             | low risk of bias           | probably high risk of bias | low risk of bias          | low risk of bias          | low risk of bias           | low risk of bias          |

|                            |                       |       |           |                            |                            |                            |                   |                           |                           |
|----------------------------|-----------------------|-------|-----------|----------------------------|----------------------------|----------------------------|-------------------|---------------------------|---------------------------|
| triazavirin                | standard care/placebo | 12679 | Wu        | high risk of bias          | probably high risk of bias | low risk of bias           | low risk of bias  | probably low risk of bias | low risk of bias          |
| tyrosine kinase inhibitors | standard care/placebo | 60872 | Strich    | probably low risk of bias  | low risk of bias           | low risk of bias           | low risk of bias  | low risk of bias          | low risk of bias          |
| umifenovir                 | standard care/placebo | 12798 | Yethindra | probably high risk of bias | probably high risk of bias | low risk of bias           | high risk of bias | probably low risk of bias | low risk of bias          |
|                            |                       | 52841 | Darazam_3 | low risk of bias           | probably high risk of bias | low risk of bias           | low risk of bias  | probably low risk of bias | probably low risk of bias |
| vitamin C                  | standard care/placebo | 25793 | Kumari    | probably high risk of bias | probably high risk of bias | low risk of bias           | high risk of bias | probably low risk of bias | low risk of bias          |
|                            |                       | 31458 | Thomas    | low risk of bias           | probably high risk of bias | probably high risk of bias | high risk of bias | probably low risk of bias | probably low risk of bias |
| vitamin C                  | vitamin C, zinc       | 31458 | Thomas    | low risk of bias           | probably high risk of bias | probably high risk of bias | high risk of bias | probably low risk of bias | probably low risk of bias |
| vitamin C                  | zinc                  | 31458 | Thomas    | low risk of bias           | probably high risk of bias | probably high risk of bias | high risk of bias | probably low risk of bias | probably low risk of bias |
| vitamin C, zinc            | standard care/placebo | 31458 | Thomas    | low risk of bias           | probably high risk of bias | probably high risk of bias | high risk of bias | probably low risk of bias | probably low risk of bias |
| vitamin C, zinc            | zinc                  | 31458 | Thomas    | low risk of bias           | probably high risk of bias | probably high risk of bias | high risk of bias | probably low risk of bias | probably low risk of bias |
| xiyanping                  | standard care/placebo | 43229 | Zhang_3   | low risk of bias           | probably high risk of bias | low risk of bias           | low risk of bias  | low risk of bias          | low risk of bias          |
| zinc                       | standard care/placebo | 31458 | Thomas    | low risk of bias           | probably high risk of bias | probably high risk of bias | high risk of bias | probably low risk of bias | probably low risk of bias |

| Time to Viral Clearance                 |                                                  |                    |               |                            |                              |                           |                        |                            |                            |
|-----------------------------------------|--------------------------------------------------|--------------------|---------------|----------------------------|------------------------------|---------------------------|------------------------|----------------------------|----------------------------|
| Treatment 1                             | Treatment 2                                      | Trial              | First author  | Randomization              | Deviations from the intended | Missing outcome data      | Measurement of outcome | Selection of the reported  | Other (Competing risks)    |
| 2-deoxy-D-glucose                       | standard care/placebo                            | 66751a             | Narayan Bhatt | probably high risk of bias | high risk of bias            | low risk of bias          | low risk of bias       | low risk of bias           | probably low risk of bias  |
| CCK-A agonist and CCK-B antagonist      | standard care/placebo                            | Lattmann           | Lattmann      | probably high risk of bias | probably high risk of bias   | low risk of bias          | low risk of bias       | low risk of bias           | probably low risk of bias  |
| CK2 inhibitor                           | standard care/placebo                            | 13070, 26887       | Cruz          | probably high risk of bias | probably high risk of bias   | low risk of bias          | low risk of bias       | probably high risk of bias | probably low risk of bias  |
| HIV reverse transcriptase inhibitor     | standard care/placebo                            | 8469               | Ren           | probably high risk of bias | probably high risk of bias   | low risk of bias          | low risk of bias       | low risk of bias           | low risk of bias           |
| IL6 receptor antagonists                | standard care/placebo                            | 11850              | Wang_4        | probably high risk of bias | probably high risk of bias   | low risk of bias          | low risk of bias       | probably low risk of bias  | probably low risk of bias  |
| JAK inhibitors                          | standard care/placebo                            | 4161               | Cao_2         | low risk of bias           | probably high risk of bias   | low risk of bias          | low risk of bias       | probably low risk of bias  | probably low risk of bias  |
| L-arginine                              | standard care/placebo                            | 64005              | Florentino    | low risk of bias           | low risk of bias             | low risk of bias          | low risk of bias       | low risk of bias           | probably low risk of bias  |
| rs, curcuminoids, piperine, resveratrol | standard care/placebo                            | 67818              | Majeed        | probably low risk of bias  | low risk of bias             | low risk of bias          | low risk of bias       | low risk of bias           | low risk of bias           |
| antihhepaciviral                        | romycin, hydroxychloroquine, oseltamivir         | 44111              | Elgohary      | low risk of bias           | probably high risk of bias   | low risk of bias          | low risk of bias       | probably high risk of bias | probably low risk of bias  |
| azithromycin                            | clarithromycin                                   | 58017              | Rashad_1      | low risk of bias           | probably high risk of bias   | low risk of bias          | low risk of bias       | probably high risk of bias | low risk of bias           |
| azithromycin                            | standard care/placebo                            | 58017              | Rashad_1      | low risk of bias           | probably high risk of bias   | low risk of bias          | low risk of bias       | probably high risk of bias | low risk of bias           |
| azithromycin, hydroxychloroquine        | hydroxychloroquine                               | 33489, Johnston    | Johnston      | probably low risk of bias  | low risk of bias             | low risk of bias          | low risk of bias       | low risk of bias           | low risk of bias           |
| azithromycin, hydroxychloroquine        | standard care/placebo                            | 33489, Johnston    | Johnston      | probably low risk of bias  | low risk of bias             | low risk of bias          | low risk of bias       | low risk of bias           | low risk of bias           |
| azithromycin, vitamins                  | favipiravir                                      | Khavkina           | Khavkina      | probably high risk of bias | probably high risk of bias   | probably low risk of bias | low risk of bias       | probably low risk of bias  | low risk of bias           |
| azithromycin, vitamins                  | hydroxychloroquine, interferon alpha, umifenovir | Khavkina           | Khavkina      | probably high risk of bias | probably high risk of bias   | probably low risk of bias | low risk of bias       | probably low risk of bias  | low risk of bias           |
| baloxavir marboxil                      | favipiravir                                      | 2637, Lou, Lou (1) | Lou           | low risk of bias           | probably high risk of bias   | low risk of bias          | low risk of bias       | low risk of bias           | low risk of bias           |
| baloxavir marboxil                      | standard care/placebo                            | 2637, Lou, Lou (1) | Lou           | low risk of bias           | probably high risk of bias   | low risk of bias          | low risk of bias       | low risk of bias           | low risk of bias           |
| cannabidiol                             | standard care/placebo                            | 66954              | Crippa        | probably low risk of bias  | low risk of bias             | low risk of bias          | low risk of bias       | low risk of bias           | low risk of bias           |
| clarithromycin                          | standard care/placebo                            | 58017              | Rashad_1      | low risk of bias           | probably high risk of bias   | low risk of bias          | low risk of bias       | probably high risk of bias | low risk of bias           |
| corticosteroids (systemic)              | standard care/placebo                            | 27644              | Tang_2        | probably low risk of bias  | probably high risk of bias   | low risk of bias          | low risk of bias       | low risk of bias           | probably high risk of bias |
| doxycycline, ivermectin                 | ivermectin                                       | Ahmed              | Ahmed         | probably low risk of bias  | low risk of bias             | low risk of bias          | low risk of bias       | probably low risk of bias  | probably low risk of bias  |
| doxycycline, ivermectin                 | standard care/placebo                            | Ahmed              | Ahmed         | probably low risk of bias  | low risk of bias             | low risk of bias          | low risk of bias       | probably low risk of bias  | probably low risk of bias  |

|                                         |                                                  |                     |                  |                            |                            |                           |                  |                            |                           |
|-----------------------------------------|--------------------------------------------------|---------------------|------------------|----------------------------|----------------------------|---------------------------|------------------|----------------------------|---------------------------|
| favipiravir                             | hydroxychloroquine, interferon alpha, umifenovir | Khavkina            | Khavkina         | probably high risk of bias | probably high risk of bias | probably low risk of bias | low risk of bias | probably low risk of bias  | low risk of bias          |
|                                         |                                                  |                     |                  |                            |                            |                           |                  |                            |                           |
| favipiravir                             | standard care/placebo                            | 2637, Lou, Lou (1   | Lou              | low risk of bias           | probably high risk of bias | low risk of bias          | low risk of bias | low risk of bias           | low risk of bias          |
|                                         |                                                  | 32588               | Ruzhentsova      | probably high risk of bias | probably high risk of bias | low risk of bias          | low risk of bias | low risk of bias           | probably low risk of bias |
|                                         |                                                  | 24988, Udwardia     | Udwardia         | probably high risk of bias | probably high risk of bias | low risk of bias          | low risk of bias | low risk of bias           | low risk of bias          |
|                                         |                                                  | 40875               | Zhao_2           | low risk of bias           | probably high risk of bias | low risk of bias          | low risk of bias | low risk of bias           | low risk of bias          |
| hydroxychloroquine                      | hydroxychloroquine, lopinavir-ritonavir          | 52697               | Arabi            | low risk of bias           | probably high risk of bias | low risk of bias          | low risk of bias | probably low risk of bias  | low risk of bias          |
|                                         |                                                  |                     |                  |                            |                            |                           |                  |                            |                           |
| hydroxychloroquine                      | lopinavir-ritonavir                              | pilot_4             | Huang_1          | probably high risk of bias | probably high risk of bias | low risk of bias          | low risk of bias | low risk of bias           | probably low risk of bias |
|                                         |                                                  | 52697               | Arabi            | low risk of bias           | probably high risk of bias | low risk of bias          | low risk of bias | probably low risk of bias  | low risk of bias          |
| hydroxychloroquine                      | standard care/placebo                            | 3321, 776           | Tang_1           | low risk of bias           | probably high risk of bias | low risk of bias          | low risk of bias | low risk of bias           | low risk of bias          |
|                                         |                                                  | C158                | Chen_3           | probably high risk of bias | probably high risk of bias | low risk of bias          | low risk of bias | probably low risk of bias  | low risk of bias          |
|                                         |                                                  | 6987                | Chen_4           | probably high risk of bias | probably high risk of bias | high risk of bias         | low risk of bias | low risk of bias           | low risk of bias          |
|                                         |                                                  | 8057, Chen (Cheng-I | Chen_5           | low risk of bias           | probably high risk of bias | low risk of bias          | low risk of bias | low risk of bias           | low risk of bias          |
|                                         |                                                  | 11299               | Abd-Elsalam_1    | probably high risk of bias | probably high risk of bias | low risk of bias          | low risk of bias | probably low risk of bias  | low risk of bias          |
|                                         |                                                  | 33489, Johnston     | Johnston         | probably low risk of bias  | low risk of bias           | low risk of bias          | low risk of bias | low risk of bias           | low risk of bias          |
|                                         |                                                  | Byakika-Kibwika     | Byakika-Kibwika  | low risk of bias           | probably high risk of bias | low risk of bias          | low risk of bias | probably low risk of bias  | probably low risk of bias |
|                                         |                                                  | 52697               | Arabi            | low risk of bias           | probably high risk of bias | low risk of bias          | low risk of bias | probably low risk of bias  | low risk of bias          |
|                                         |                                                  |                     |                  |                            |                            |                           |                  |                            |                           |
| hydroxychloroquine, lopinavir-ritonavir | lopinavir-ritonavir                              | 52697               | Arabi            | low risk of bias           | probably high risk of bias | low risk of bias          | low risk of bias | probably low risk of bias  | low risk of bias          |
|                                         |                                                  |                     |                  |                            |                            |                           |                  |                            |                           |
| hydroxychloroquine, lopinavir-ritonavir | standard care/placebo                            | 52697               | Arabi            | low risk of bias           | probably high risk of bias | low risk of bias          | low risk of bias | probably low risk of bias  | low risk of bias          |
|                                         |                                                  |                     |                  |                            |                            |                           |                  |                            |                           |
| hydroxychloroquine, rivabirin           | lopinavir-ritonavir, ribavirin                   | 46308_severe        | Singh_3          | probably high risk of bias | probably high risk of bias | low risk of bias          | low risk of bias | low risk of bias           | low risk of bias          |
|                                         |                                                  |                     |                  |                            |                            |                           |                  |                            |                           |
| hydroxychloroquine, rivabirin           | standard care/placebo                            | 46308_non severe    | Singh_2          | probably high risk of bias | probably high risk of bias | low risk of bias          | low risk of bias | low risk of bias           | low risk of bias          |
|                                         |                                                  | 46308_severe        | Singh_3          | probably high risk of bias | probably high risk of bias | low risk of bias          | low risk of bias | low risk of bias           | low risk of bias          |
| interferon alpha                        | combinant super combinant interferon             | 32737, 7, 9574      | Li_2             | probably high risk of bias | probably high risk of bias | low risk of bias          | low risk of bias | low risk of bias           | low risk of bias          |
|                                         |                                                  |                     |                  |                            |                            |                           |                  |                            |                           |
| interferon beta, ribavirin              | standard care/placebo                            | 2942                | Hung             | probably high risk of bias | probably high risk of bias | low risk of bias          | low risk of bias | low risk of bias           | low risk of bias          |
|                                         |                                                  |                     |                  |                            |                            |                           |                  |                            |                           |
| interferon gamma                        | standard care/placebo                            | 9880                | Esquivel-Moynelo | probably high risk of bias | probably high risk of bias | high risk of bias         | low risk of bias | probably low risk of bias  | low risk of bias          |
|                                         |                                                  |                     |                  |                            |                            |                           |                  |                            |                           |
| interferon kappa, trefoil factor 2      | standard care/placebo                            | 13797               | Fu               | probably high risk of bias | probably high risk of bias | low risk of bias          | low risk of bias | low risk of bias           | low risk of bias          |
|                                         |                                                  |                     |                  |                            |                            |                           |                  |                            |                           |
| ivermectin                              | lopinavir-ritonavir                              | 25394, Babalola     | Babalola         | low risk of bias           | low risk of bias           | low risk of bias          | low risk of bias | low risk of bias           | low risk of bias          |
|                                         |                                                  |                     |                  |                            |                            |                           |                  |                            |                           |
| ivermectin                              | standard care/placebo                            | Ahmed               | Ahmed            | probably low risk of bias  | low risk of bias           | low risk of bias          | low risk of bias | probably low risk of bias  | probably low risk of bias |
|                                         |                                                  | 27334, Chaccour     | Chaccour         | low risk of bias           | low risk of bias           | low risk of bias          | low risk of bias | probably low risk of bias  | probably low risk of bias |
|                                         |                                                  | 35667               | Pott-Junior      | low risk of bias           | probably high risk of bias | low risk of bias          | low risk of bias | low risk of bias           | probably low risk of bias |
| ivermectin nasal spray                  | standard care/placebo                            | 49942               | Aref             | probably high risk of bias | probably high risk of bias | low risk of bias          | low risk of bias | probably high risk of bias | probably low risk of bias |
|                                         |                                                  |                     |                  |                            |                            |                           |                  |                            |                           |
| leflunomide                             | standard care/placebo                            | 8784                | Hu               | probably high risk of bias | probably high risk of bias | low risk of bias          | low risk of bias | low risk of bias           | low risk of bias          |
|                                         |                                                  | 13540               | Wang_5           | probably high risk of bias | probably high risk of bias | low risk of bias          | low risk of bias | low risk of bias           | low risk of bias          |

|                                |                                |                                                 |                     |                                      |                                                          |                                      |                                      |                                               |                                               |
|--------------------------------|--------------------------------|-------------------------------------------------|---------------------|--------------------------------------|----------------------------------------------------------|--------------------------------------|--------------------------------------|-----------------------------------------------|-----------------------------------------------|
| lopinavir-ritonavir            | lopinavir-ritonavir, novaferon | 10121, 2338                                     | Zheng               | probably high risk of bias           | probably high risk of bias                               | low risk of bias                     | low risk of bias                     | low risk of bias                              | probably low risk of bias                     |
| lopinavir-ritonavir            | lopinavir-ritonavir, ribavirin | 10067, 2615                                     | Huang_2             | probably high risk of bias           | probably high risk of bias                               | low risk of bias                     | low risk of bias                     | low risk of bias                              | low risk of bias                              |
| lopinavir-ritonavir            | novaferon                      | 10121, 2338                                     | Zheng               | probably high risk of bias           | probably high risk of bias                               | low risk of bias                     | low risk of bias                     | low risk of bias                              | probably low risk of bias                     |
| lopinavir-ritonavir            | ribavirin                      | 10067, 2615                                     | Huang_2             | probably high risk of bias           | probably high risk of bias                               | low risk of bias                     | low risk of bias                     | low risk of bias                              | low risk of bias                              |
| lopinavir-ritonavir            | standard care/placebo          | 1243, 234<br>52697                              | Li<br>Arabi         | low risk of bias<br>low risk of bias | probably high risk of bias<br>probably high risk of bias | low risk of bias<br>low risk of bias | low risk of bias<br>low risk of bias | low risk of bias<br>probably low risk of bias | low risk of bias<br>low risk of bias          |
| lopinavir-ritonavir            | umifenovir                     | 1243, 234                                       | Li                  | low risk of bias                     | probably high risk of bias                               | low risk of bias                     | low risk of bias                     | low risk of bias                              | low risk of bias                              |
| lopinavir-ritonavir, novaferon | novaferon                      | 10121, 2338                                     | Zheng               | probably high risk of bias           | probably high risk of bias                               | low risk of bias                     | low risk of bias                     | low risk of bias                              | probably low risk of bias                     |
| lopinavir-ritonavir, ribavirin | ribavirin                      | 10067, 2615                                     | Huang_2             | probably high risk of bias           | probably high risk of bias                               | low risk of bias                     | low risk of bias                     | low risk of bias                              | low risk of bias                              |
| lopinavir-ritonavir, ribavirin | standard care/placebo          | 46308_severe                                    | Singh_3             | probably high risk of bias           | probably high risk of bias                               | low risk of bias                     | low risk of bias                     | low risk of bias                              | low risk of bias                              |
| molnupiravir                   | standard care/placebo          | 46473, Fischer                                  | Fischer             | low risk of bias                     | low risk of bias                                         | low risk of bias                     | low risk of bias                     | low risk of bias                              | low risk of bias                              |
| nitric oxide                   | standard care/placebo          | Moni                                            | Moni                | low risk of bias                     | probably high risk of bias                               | high risk of bias                    | low risk of bias                     | low risk of bias                              | low risk of bias                              |
| peginterferon lambda           | standard care/placebo          | 18418, 28233<br>19514, Jagannathan, Jagannathan | Feld<br>Jagannathan | low risk of bias<br>low risk of bias | low risk of bias<br>probably low risk of bias            | low risk of bias<br>low risk of bias | low risk of bias<br>low risk of bias | high risk of bias<br>low risk of bias         | low risk of bias<br>probably low risk of bias |
| serine protease inhibitors     | standard care/placebo          | 70176                                           | Zhuravel            | low risk of bias                     | probably high risk of bias                               | low risk of bias                     | low risk of bias                     | probably low risk of bias                     | probably low risk of bias                     |
| triazavirin                    | standard care/placebo          | 12679                                           | Wu                  | high risk of bias                    | probably high risk of bias                               | low risk of bias                     | low risk of bias                     | probably low risk of bias                     | probably low risk of bias                     |
| umifenovir                     | standard care/placebo          | 1243, 234                                       | Li                  | low risk of bias                     | probably high risk of bias                               | low risk of bias                     | low risk of bias                     | low risk of bias                              | low risk of bias                              |
| vitamin D                      | standard care/placebo          | 18926                                           | Ratogi              | probably high risk of bias           | probably high risk of bias                               | low risk of bias                     | probably low risk of bias            | low risk of bias                              | low risk of bias                              |
| xiyanping                      | standard care/placebo          | 43229                                           | Zhang_3             | low risk of bias                     | probably high risk of bias                               | low risk of bias                     | low risk of bias                     | probably low risk of bias                     | low risk of bias                              |
| zinc                           | standard care/placebo          | Abdelmaksoud, Has, Hassan, Abdelmaksoud         |                     | probably high risk of bias           | probably high risk of bias                               | low risk of bias                     | low risk of bias                     | probably low risk of bias                     | probably low risk of bias                     |

## Network plots

## NETWORK PLOTS

The size of the circles is proportional to the number of patients randomised to that intervention and the size of the lines is proportional to the inverse of the standard error of the effect estimate.

## Mortality

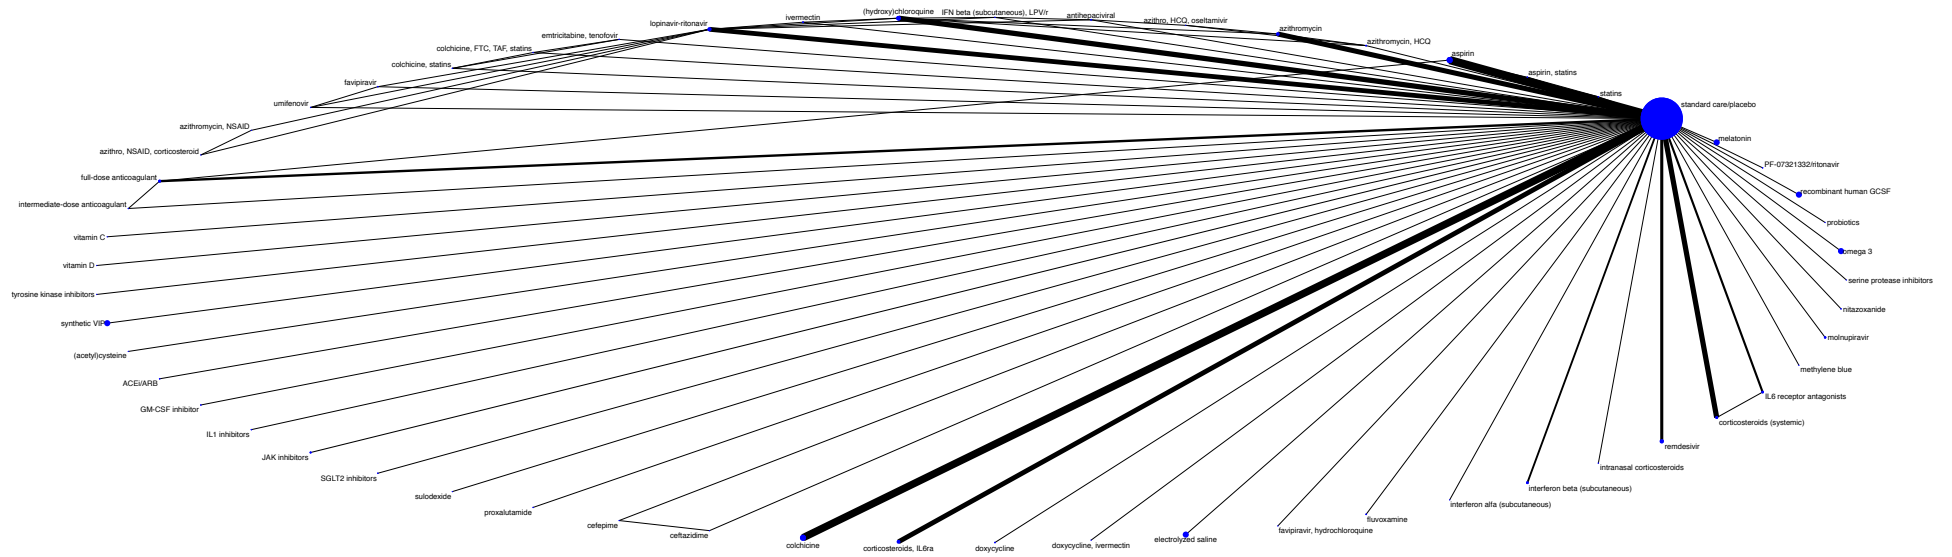

## Mechanical ventilation

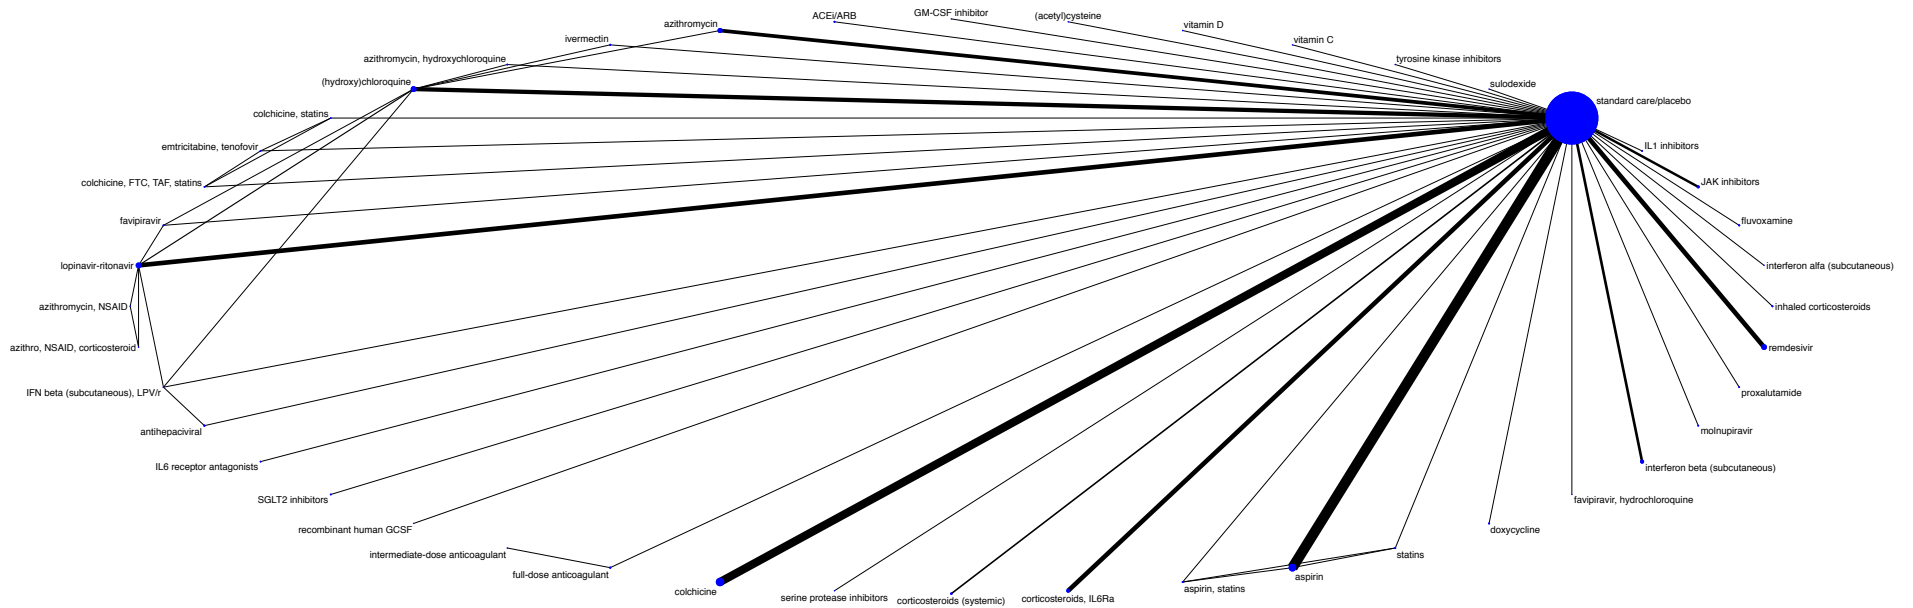

## Adverse events leading to discontinuation

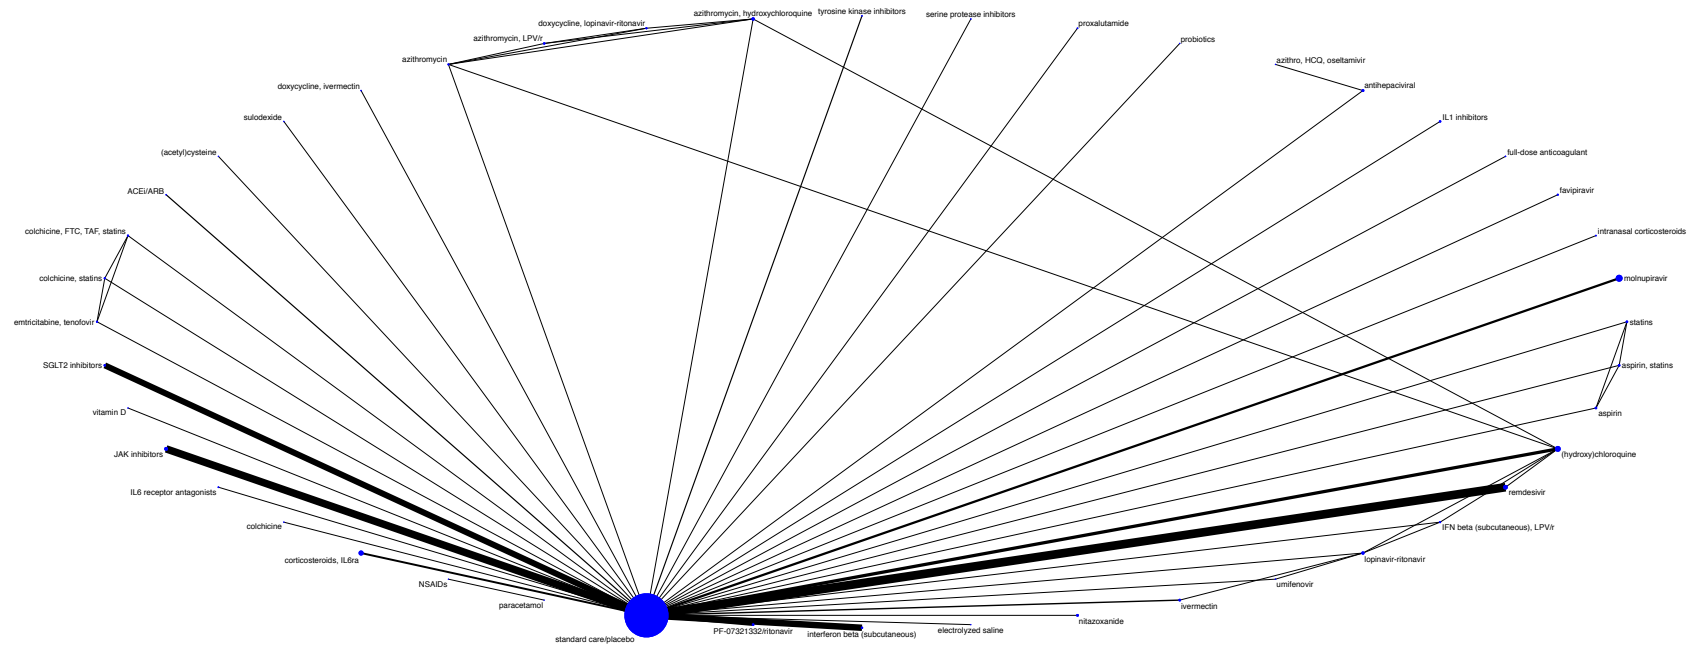

## Admission to hospital

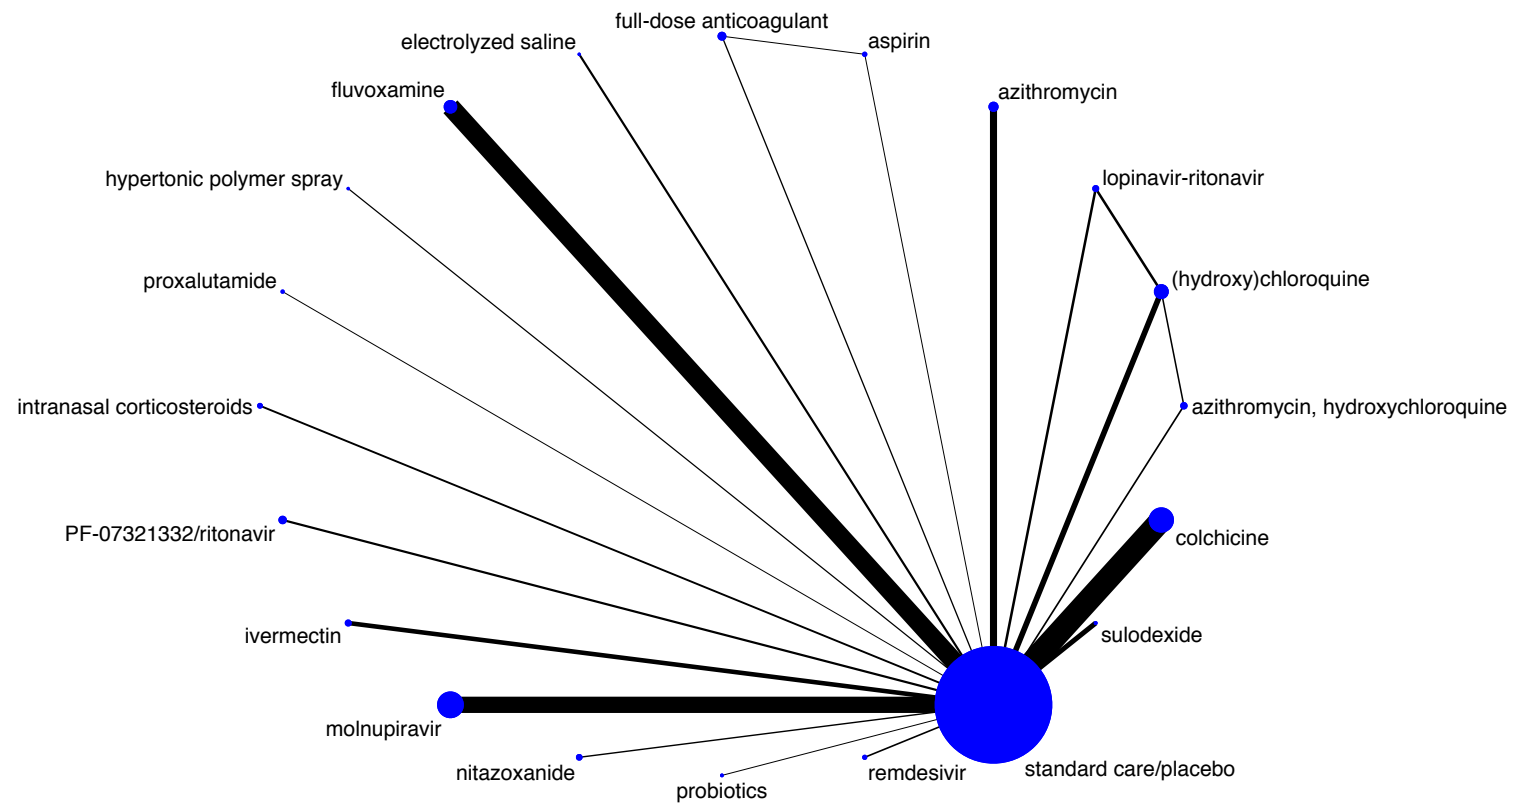

## Venous thromboembolism

---

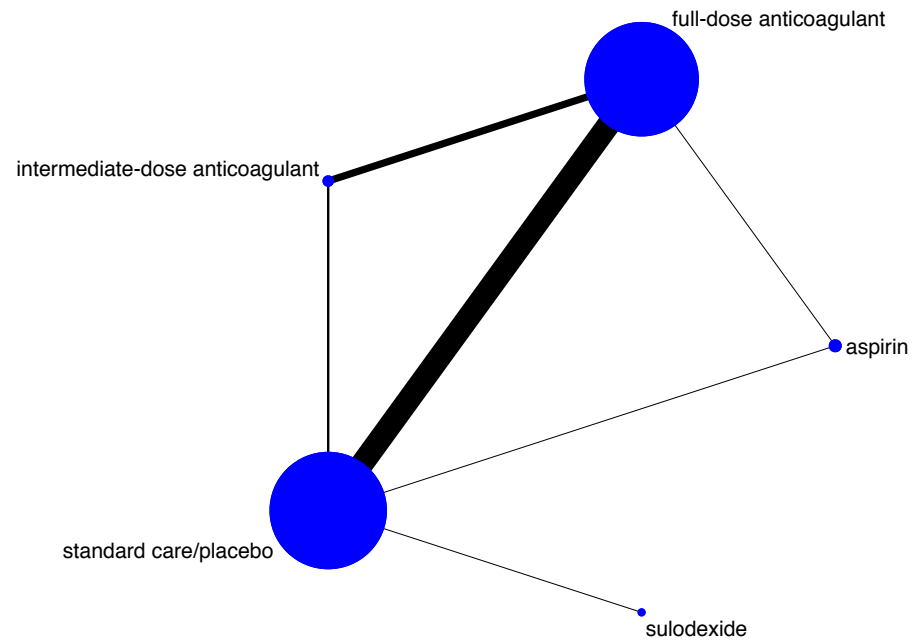

## Clinically-important bleeding

---

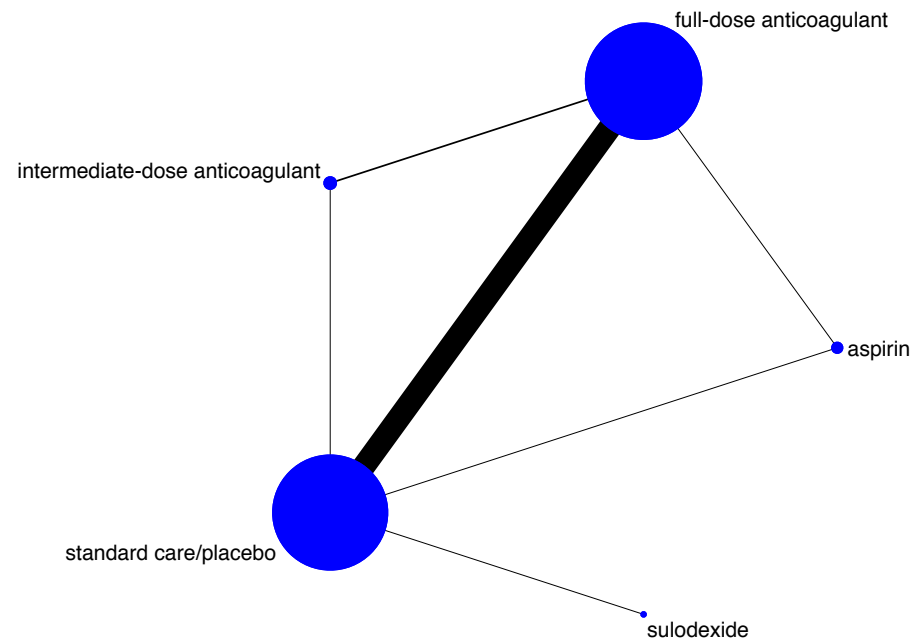

## Duration of hospital stay

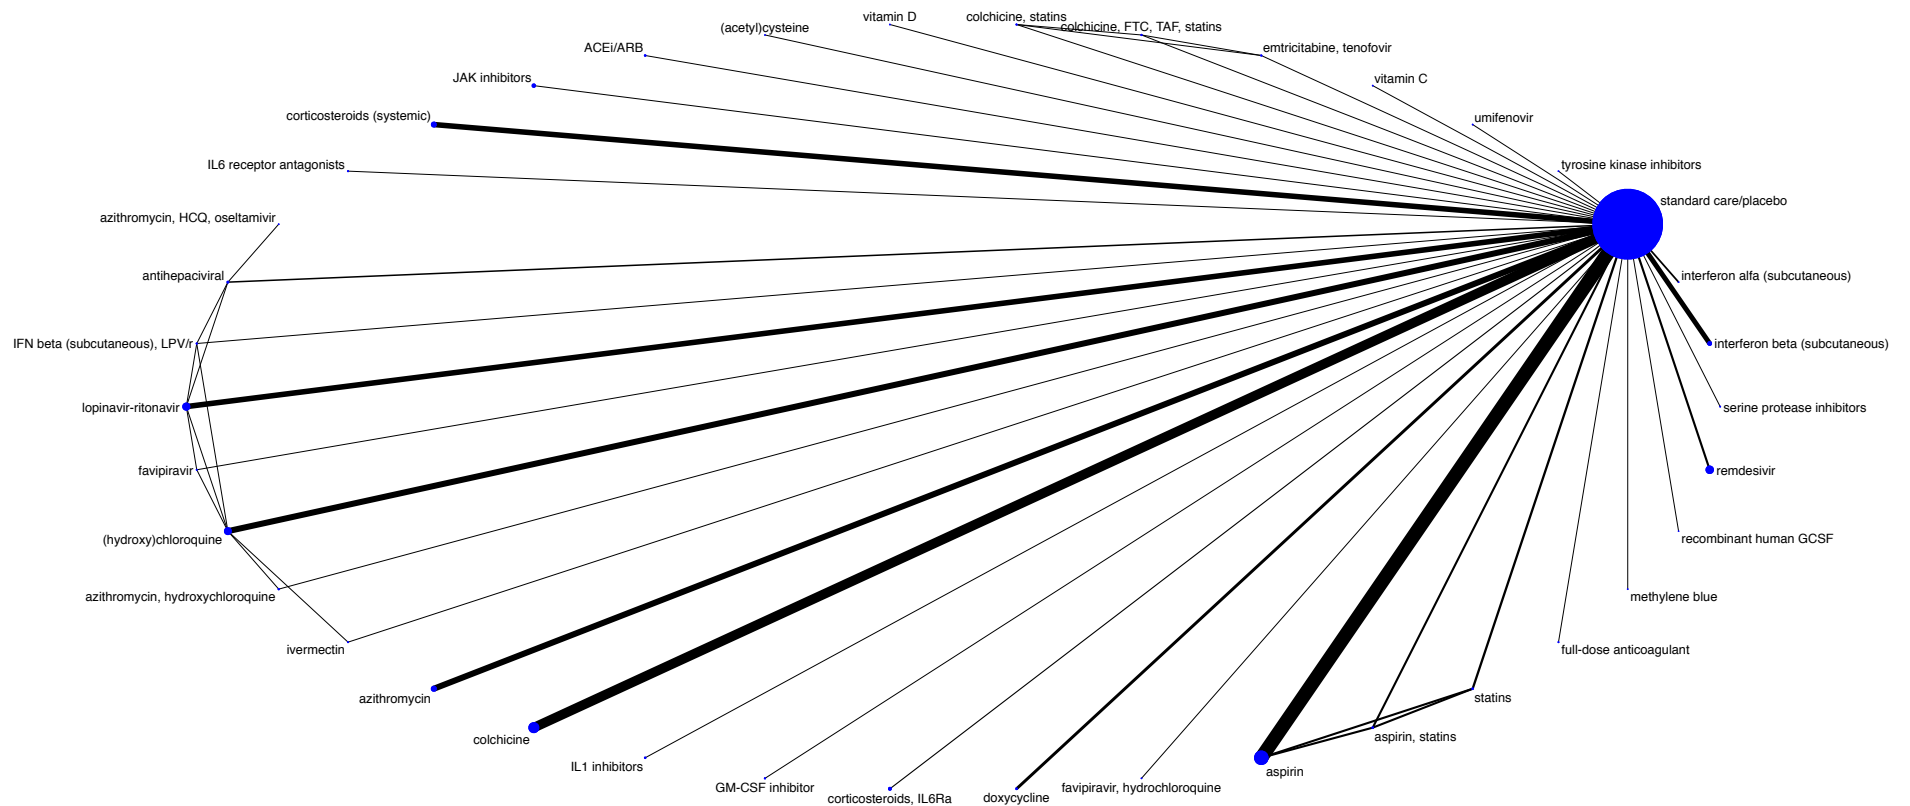

## Duration of mechanical ventilation

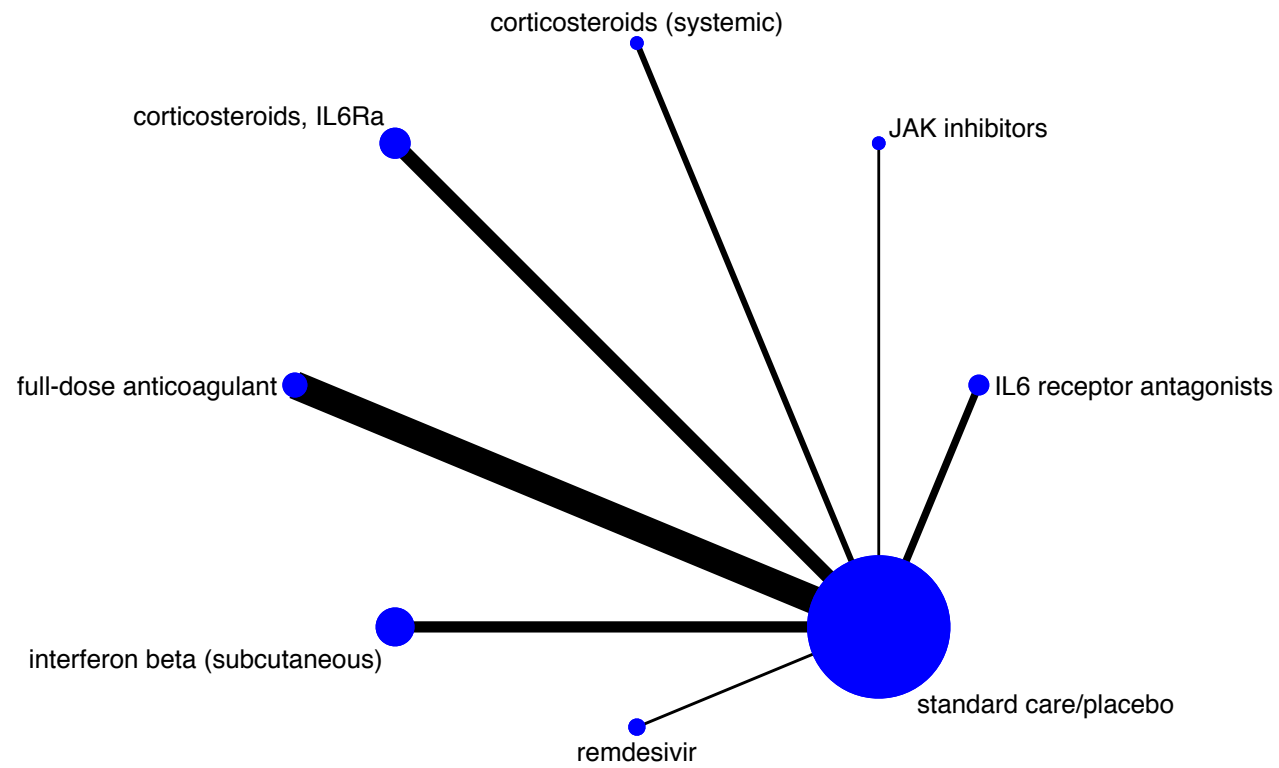

## Time to symptom resolution

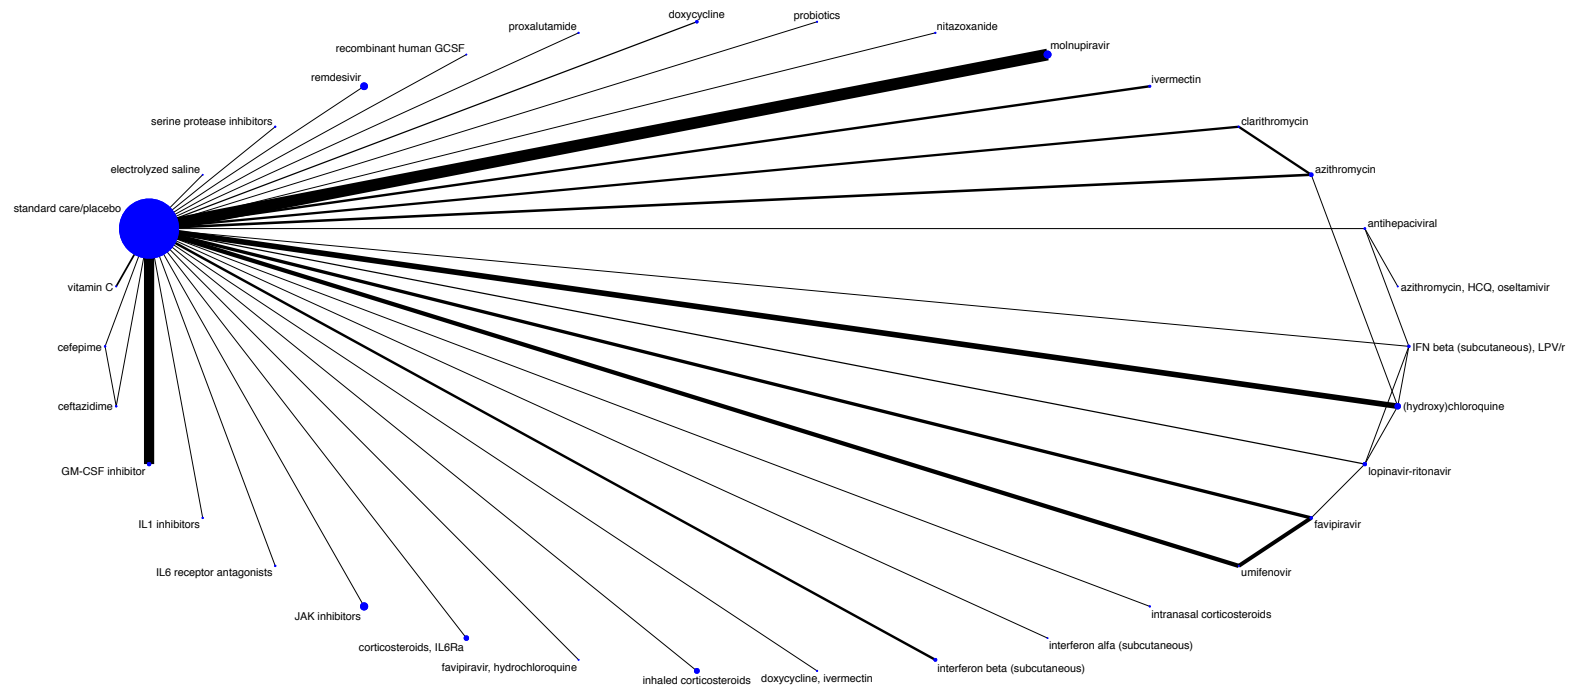

Complete network meta-analysis results and GRADE









Complete network meta-analysis results and GRADE

| Admission to hospital  |               |                   |                |                |                               |                |                |              |                   |                |                |                               |                |                |              |                   |                |                |                               |                |                |              |
|------------------------|---------------|-------------------|----------------|----------------|-------------------------------|----------------|----------------|--------------|-------------------|----------------|----------------|-------------------------------|----------------|----------------|--------------|-------------------|----------------|----------------|-------------------------------|----------------|----------------|--------------|
| Comparison             |               | Direct estimate   |                |                |                               |                |                |              | Indirect estimate |                |                |                               |                |                |              | Network estimate  |                |                |                               |                |                |              |
| Treatment 1            | Treatment 2   | Relative estimate |                |                | Absolute estimate (per 1,000) |                |                | Final rating | Relative estimate |                |                | Absolute estimate (per 1,000) |                |                | Final rating | Relative estimate |                |                | Absolute estimate (per 1,000) |                |                | Final rating |
|                        |               | Point estimate    | CI lower limit | CI upper limit | Point estimate                | CI lower limit | CI upper limit |              | Point estimate    | CI lower limit | CI upper limit | Point estimate                | CI lower limit | CI upper limit |              | Point estimate    | CI lower limit | CI upper limit | Point estimate                | CI lower limit | CI upper limit |              |
| nitazoxanide           | probiotics    | NA                | NA             | NA             | NA                            | NA             | NA             | NA           | 1.08E+04          | 0.00           | 5.20E+52       | -723.15                       | -991.73        | 48.30          | VERY LOW     | 1.08E+04          | 0.00           | 5.20E+52       | -723.15                       | -991.73        | 48.30          | VERY LOW     |
| nitazoxanide           | proxalutamide | NA                | NA             | NA             | NA                            | NA             | NA             | NA           | 19.32             | 2.92           | 185.59         | 27.31                         | 5.53           | 72.67          | VERY LOW     | 19.32             | 2.92           | 185.59         | 27.31                         | 5.53           | 72.67          | VERY LOW     |
| nitazoxanide           | remdesivir    | NA                | NA             | NA             | NA                            | NA             | NA             | NA           | 2.24              | 0.38           | 12.95          | 15.62                         | -16.90         | 62.73          | VERY LOW     | 2.24              | 0.38           | 12.95          | 15.62                         | -16.90         | 62.73          | VERY LOW     |
| nitazoxanide           | sulodexide    | NA                | NA             | NA             | NA                            | NA             | NA             | NA           | 1.04              | 0.22           | 4.62           | 2.86                          | -36.71         | 51.67          | VERY LOW     | 1.04              | 0.22           | 4.62           | 2.86                          | -36.71         | 51.67          | VERY LOW     |
| nirmatrelvir/ritonavir | probiotics    | NA                | NA             | NA             | NA                            | NA             | NA             | NA           | 2.55E+03          | 0.00           | 1.25E+52       | -745.41                       | -998.00        | 10.70          | VERY LOW     | 2.55E+03          | 0.00           | 1.25E+52       | -745.41                       | -998.00        | 10.70          | VERY LOW     |
| nirmatrelvir/ritonavir | proxalutamide | NA                | NA             | NA             | NA                            | NA             | NA             | NA           | 4.45              | 0.70           | 42.78          | 5.05                          | -1.03          | 15.41          | VERY LOW     | 4.45              | 0.70           | 42.78          | 5.05                          | -1.03          | 15.41          | VERY LOW     |
| nirmatrelvir/ritonavir | remdesivir    | NA                | NA             | NA             | NA                            | NA             | NA             | NA           | 0.52              | 0.09           | 2.94           | -6.64                         | -30.44         | 8.35           | VERY LOW     | 0.52              | 0.09           | 2.94           | -6.64                         | -30.44         | 8.35           | VERY LOW     |
| nirmatrelvir/ritonavir | sulodexide    | NA                | NA             | NA             | NA                            | NA             | NA             | NA           | 0.24              | 0.05           | 1.04           | -19.40                        | -51.42         | 0.17           | VERY LOW     | 0.24              | 0.05           | 1.04           | -19.40                        | -51.42         | 0.17           | VERY LOW     |
| probiotics             | proxalutamide | NA                | NA             | NA             | NA                            | NA             | NA             | NA           | 0.00              | 0.00           | 2.43E+14       | 750.46                        | -2.92          | 999.76         | VERY LOW     | 0.00              | 0.00           | 2.43E+14       | 750.46                        | -2.92          | 999.76         | VERY LOW     |
| probiotics             | remdesivir    | NA                | NA             | NA             | NA                            | NA             | NA             | NA           | 0.00              | 0.00           | 2.93E+13       | 738.77                        | -22.04         | 996.56         | VERY LOW     | 0.00              | 0.00           | 2.93E+13       | 738.77                        | -22.04         | 996.56         | VERY LOW     |
| probiotics             | sulodexide    | NA                | NA             | NA             | NA                            | NA             | NA             | NA           | 0.00              | 0.00           | 1.20E+13       | 726.00                        | -38.78         | 989.53         | VERY LOW     | 0.00              | 0.00           | 1.20E+13       | 726.00                        | -38.78         | 989.53         | VERY LOW     |
| proxalutamide          | remdesivir    | NA                | NA             | NA             | NA                            | NA             | NA             | NA           | 0.11              | 0.01           | 0.81           | -11.69                        | -34.94         | -0.69          | VERY LOW     | 0.11              | 0.01           | 0.81           | -11.69                        | -34.94         | -0.69          | VERY LOW     |
| proxalutamide          | sulodexide    | NA                | NA             | NA             | NA                            | NA             | NA             | NA           | 0.05              | 0.01           | 0.29           | -24.45                        | -55.99         | -7.36          | VERY LOW     | 0.05              | 0.01           | 0.29           | -24.45                        | -55.99         | -7.36          | VERY LOW     |
| remdesivir             | sulodexide    | NA                | NA             | NA             | NA                            | NA             | NA             | NA           | 0.46              | 0.09           | 2.18           | -12.76                        | -46.60         | 16.17          | VERY LOW     | 0.46              | 0.09           | 2.18           | -12.76                        | -46.60         | 16.17          | VERY LOW     |























| Comparison                 |             | Adverse events    |                |                |                               |                |                |              |                   |                |                |                               |                |                |                |                   |                |                |                               |                |                |                |              |     | Reasons for downgrading |
|----------------------------|-------------|-------------------|----------------|----------------|-------------------------------|----------------|----------------|--------------|-------------------|----------------|----------------|-------------------------------|----------------|----------------|----------------|-------------------|----------------|----------------|-------------------------------|----------------|----------------|----------------|--------------|-----|-------------------------|
|                            |             | Direct estimate   |                |                |                               |                |                |              | Indirect estimate |                |                |                               |                |                |                | Network estimate  |                |                |                               |                |                |                |              |     |                         |
|                            |             | Relative estimate |                |                | Absolute estimate (per 1,000) |                |                |              | Relative estimate |                |                | Absolute estimate (per 1,000) |                |                |                | Relative estimate |                |                | Absolute estimate (per 1,000) |                |                |                |              |     |                         |
| Treatment 1                | Treatment 2 | Point estimate    | CI lower limit | CI upper limit | Point estimate                | CI lower limit | CI upper limit | Final rating | Point estimate    | CI lower limit | CI upper limit | Point estimate                | Point estimate | CI lower limit | CI upper limit | Final rating      | Point estimate | CI lower limit | CI upper limit                | Point estimate | CI lower limit | CI upper limit | Final rating |     |                         |
| tyrosine kinase inhibitors | umifenovir  | NA                | NA             | NA             | NA                            | NA             | NA             | NA           | NA                | NA             | NA             | NA                            | 0.057          | 57             | 5              | 109               | LOW            | NA             | NA                            | NA             | 57             | 5              | 109          | LOW | RoB, Imprecision        |
| tyrosine kinase inhibitors | vitamin D   | NA                | NA             | NA             | NA                            | NA             | NA             | NA           | NA                | NA             | NA             | NA                            | 0.063          | 63             | 13             | 113               | LOW            | NA             | NA                            | NA             | 63             | 13             | 113          | LOW | RoB, Imprecision        |
| umifenovir                 | vitamin D   | NA                | NA             | NA             | NA                            | NA             | NA             | NA           | NA                | NA             | NA             | NA                            | 0.006          | 6              | -32            | 45                | LOW            | NA             | NA                            | NA             | 6              | -32            | 45           | LOW | RoB, Imprecision        |

Complete network meta-analysis results and GRADE

| Clinically important bleeding   |                                 |                   |                |                |                               |                |                |              |                   |                |                |                               |                |                |              |                   |                |                |                               |                |                |              |                         |
|---------------------------------|---------------------------------|-------------------|----------------|----------------|-------------------------------|----------------|----------------|--------------|-------------------|----------------|----------------|-------------------------------|----------------|----------------|--------------|-------------------|----------------|----------------|-------------------------------|----------------|----------------|--------------|-------------------------|
| Comparison                      |                                 | Direct estimate   |                |                |                               |                |                |              | Indirect estimate |                |                |                               |                |                |              | Network estimate  |                |                |                               |                |                |              |                         |
| Treatment 1                     | Treatment 2                     | Relative estimate |                |                | Absolute estimate (per 1,000) |                |                | Final rating | Relative estimate |                |                | Absolute estimate (per 1,000) |                |                | Final rating | Relative estimate |                |                | Absolute estimate (per 1,000) |                |                | Final rating | Reasons for downgrading |
|                                 |                                 | Point estimate    | CI lower limit | CI upper limit | Point estimate                | CI lower limit | CI upper limit |              | Point estimate    | CI lower limit | CI upper limit | Point estimate                | CI lower limit | CI upper limit |              | Point estimate    | CI lower limit | CI upper limit | Point estimate                | CI lower limit | CI upper limit |              |                         |
| aspirin                         | standard care/placebo           | 4.79              | 0.18           | 125.90         | 59.10                         | -13.76         | 666.81         | VERY LOW     | NA                | NA             | NA             | NA                            | NA             | NA             | NA           | 1.59              | 0.18           | 9.21           | 20.57                         | -13.86         | 121.44         | LOW          | Imprecisionx2           |
| full-dose anticoagulant         | standard care/placebo           | 2.01              | 1.25           | 3.23           | 16.51                         | 4.19           | 35.68          | LOW          | 4.37              | 0.24           | 102.58         | 52.95                         | -12.75         | 620.94         | VERY LOW     | 2.15              | 1.35           | 3.52           | 19.85                         | 6.00           | 40.09          | LOW          | RoB, Imprecision        |
| intermediate-dose anticoagulant | standard care/placebo           | 0.99              | 0.10           | 10.01          | -0.20                         | -15.21         | 129.77         | VERY LOW     | 0.49              | 0.05           | 2.64           | -8.49                         | -15.98         | 26.40          | LOW          | 0.66              | 0.15           | 2.48           | -3.02                         | -14.38         | 23.81          | LOW          | RoB, Imprecision        |
| sulodexide                      | standard care/placebo           | 0.32              | 0.01           | 9.72           | -11.46                        | -16.70         | 126.13         | VERY LOW     | NA                | NA             | NA             | NA                            | NA             | NA             | NA           | 0.00              | 0.00           | 0.60           | -14.14                        | -16.88         | 2.55           | LOW          | RoB, Imprecision        |
| full-dose anticoagulant         | aspirin                         | 1.57              | 0.22           | 11.09          | NA                            | NA             | NA             | VERY LOW     | NA                | NA             | NA             | NA                            | NA             | NA             | NA           | 1.35              | 0.25           | 11.80          | -0.72                         | -98.51         | 38.49          | LOW          | Imprecisionx2           |
| aspirin                         | intermediate-dose anticoagulant | NA                | NA             | NA             | NA                            | NA             | NA             | NA           | 2.39              | 0.20           | 23.39          | 23.60                         | -21.53         | 124.59         | VERY LOW     | 2.39              | 0.20           | 23.39          | 23.60                         | -21.53         | 124.59         | VERY LOW     | RoB, Imprecisionx2      |
| aspirin                         | sulodexide                      | NA                | NA             | NA             | NA                            | NA             | NA             | NA           | 1.10E+09          | 2.30           | 3.13E+23       | 34.72                         | 0.35           | 136.97         | VERY LOW     | 1.10E+09          | 2.30           | 3.13E+23       | 34.72                         | 0.35           | 136.97         | VERY LOW     | RoB, Imprecisionx3      |
| intermediate-dose anticoagulant | full-dose anticoagulant         | 0.40              | 0.09           | 1.78           | NA                            | NA             | NA             | VERY LOW     | 0.47              | 0.04           | 5.36           | NA                            | NA             | NA             | VERY LOW     | 0.31              | 0.07           | 1.10           | -22.88                        | -44.97         | 2.90           | VERY LOW     | RoB, Imprecisionx2      |
| full-dose anticoagulant         | sulodexide                      | NA                | NA             | NA             | NA                            | NA             | NA             | NA           | 1.48E+09          | 3.64           | 4.60E+23       | 33.99                         | 14.62          | 56.61          | VERY LOW     | 1.48E+09          | 3.64           | 4.60E+23       | 33.99                         | 14.62          | 56.61          | VERY LOW     | RoB, Imprecisionx3      |
| intermediate-dose anticoagulant | sulodexide                      | NA                | NA             | NA             | NA                            | NA             | NA             | NA           | 4.40E+08          | 1.04           | 1.32E+23       | 11.12                         | -8.74          | 40.35          | VERY LOW     | 4.40E+08          | 1.04           | 1.32E+23       | 11.12                         | -8.74          | 40.35          | VERY LOW     | RoB, Imprecisionx3      |

























Complete network meta-analysis results and GRADE

| Duration of hospitalization |                                                         |                            |                |                |                               |                |                |              |                   |                   |                |                               |                |                |              |                   |                |                  |                               |                |                |              |          |                      |  |                         |
|-----------------------------|---------------------------------------------------------|----------------------------|----------------|----------------|-------------------------------|----------------|----------------|--------------|-------------------|-------------------|----------------|-------------------------------|----------------|----------------|--------------|-------------------|----------------|------------------|-------------------------------|----------------|----------------|--------------|----------|----------------------|--|-------------------------|
| Comparison                  |                                                         | Direct estimate            |                |                |                               |                |                |              |                   | Indirect estimate |                |                               |                |                |              |                   |                | Network estimate |                               |                |                |              |          |                      |  | Reasons for downgrading |
|                             |                                                         | Relative estimate          |                |                | Absolute estimate (per 1,000) |                |                | Final rating | Relative estimate |                   |                | Absolute estimate (per 1,000) |                |                | Final rating | Relative estimate |                |                  | Absolute estimate (per 1,000) |                |                | Final rating |          |                      |  |                         |
|                             |                                                         | Point estimate             | CI lower limit | CI upper limit | Point estimate                | CI lower limit | CI upper limit |              | Point estimate    | CI lower limit    | CI upper limit | Point estimate                | CI lower limit | CI upper limit |              | Point estimate    | CI lower limit | CI upper limit   | Point estimate                | CI lower limit | CI upper limit |              |          |                      |  |                         |
| Treatment 1                 | Treatment 2                                             |                            |                |                |                               |                |                |              |                   |                   |                |                               |                |                |              |                   |                |                  |                               |                |                |              |          |                      |  |                         |
|                             | methylene blue                                          | umifenovir                 | NA             | NA             | NA                            | NA             | NA             | NA           | NA                | NA                | NA             | NA                            | -3.19          | -9.99          | 3.67         | VERY LOW          | NA             | NA               | NA                            | -3.19          | -9.99          | 3.67         | VERY LOW | RoBx2, Imprecisionx2 |  |                         |
|                             | methylene blue                                          | vitamin C                  | NA             | NA             | NA                            | NA             | NA             | NA           | NA                | NA                | NA             | NA                            | -4.27          | -11.38         | 2.82         | VERY LOW          | NA             | NA               | NA                            | -4.27          | -11.38         | 2.82         | VERY LOW | RoBx2, Imprecisionx2 |  |                         |
|                             | methylene blue                                          | vitamin D                  | NA             | NA             | NA                            | NA             | NA             | NA           | NA                | NA                | NA             | NA                            | -2.5           | -9.33          | 4.37         | VERY LOW          | NA             | NA               | NA                            | -2.5           | -9.33          | 4.37         | VERY LOW | RoBx2, Imprecisionx2 |  |                         |
|                             | recombinant human granulocyte colony-stimulating factor | remdesivir                 | NA             | NA             | NA                            | NA             | NA             | NA           | NA                | NA                | NA             | NA                            | -0.14          | -7.95          | 7.73         | VERY LOW          | NA             | NA               | NA                            | -0.14          | -7.95          | 7.73         | VERY LOW | RoB, Imprecisionx2   |  |                         |
|                             | recombinant human granulocyte colony-stimulating factor | serine protease inhibitors | NA             | NA             | NA                            | NA             | NA             | NA           | NA                | NA                | NA             | NA                            | -0.22          | -9.11          | 8.66         | VERY LOW          | NA             | NA               | NA                            | -0.22          | -9.11          | 8.66         | VERY LOW | RoB, Imprecisionx2   |  |                         |
|                             | recombinant human granulocyte colony-stimulating factor | statins                    | NA             | NA             | NA                            | NA             | NA             | NA           | NA                | NA                | NA             | NA                            | 0.29           | -8.47          | 9.05         | VERY LOW          | NA             | NA               | NA                            | 0.29           | -8.47          | 9.05         | VERY LOW | RoB, Imprecisionx2   |  |                         |
|                             | recombinant human granulocyte colony-stimulating factor | tyrosine kinase inhibitors | NA             | NA             | NA                            | NA             | NA             | NA           | NA                | NA                | NA             | NA                            | -1.35          | -11.57         | 8.91         | VERY LOW          | NA             | NA               | NA                            | -1.35          | -11.57         | 8.91         | VERY LOW | RoB, Imprecisionx2   |  |                         |
|                             | recombinant human granulocyte colony-stimulating factor | umifenovir                 | NA             | NA             | NA                            | NA             | NA             | NA           | NA                | NA                | NA             | NA                            | 0.56           | -7.89          | 8.96         | VERY LOW          | NA             | NA               | NA                            | 0.56           | -7.89          | 8.96         | VERY LOW | RoB, Imprecisionx2   |  |                         |
|                             | recombinant human granulocyte colony-stimulating factor | vitamin C                  | NA             | NA             | NA                            | NA             | NA             | NA           | NA                | NA                | NA             | NA                            | -0.54          | -9.2           | 8.12         | VERY LOW          | NA             | NA               | NA                            | -0.54          | -9.2           | 8.12         | VERY LOW | RoB, Imprecisionx2   |  |                         |
|                             | recombinant human granulocyte colony-stimulating factor | vitamin D                  | NA             | NA             | NA                            | NA             | NA             | NA           | NA                | NA                | NA             | NA                            | 1.21           | -7.21          | 9.69         | VERY LOW          | NA             | NA               | NA                            | 1.21           | -7.21          | 9.69         | VERY LOW | RoB, Imprecisionx2   |  |                         |
|                             | remdesivir                                              | serine protease inhibitors | NA             | NA             | NA                            | NA             | NA             | NA           | NA                | NA                | NA             | NA                            | -0.09          | -6.04          | 5.9          | VERY LOW          | NA             | NA               | NA                            | -0.09          | -6.04          | 5.9          | VERY LOW | RoB, Imprecisionx2   |  |                         |
|                             | remdesivir                                              | statins                    | NA             | NA             | NA                            | NA             | NA             | NA           | NA                | NA                | NA             | NA                            | 0.44           | -5.34          | 6.21         | VERY LOW          | NA             | NA               | NA                            | 0.44           | -5.34          | 6.21         | VERY LOW | RoB, Imprecisionx2   |  |                         |
|                             | remdesivir                                              | tyrosine kinase inhibitors | NA             | NA             | NA                            | NA             | NA             | NA           | NA                | NA                | NA             | NA                            | -1.23          | -9.05          | 6.64         | VERY LOW          | NA             | NA               | NA                            | -1.23          | -9.05          | 6.64         | VERY LOW | RoB, Imprecisionx2   |  |                         |
|                             | remdesivir                                              | umifenovir                 | NA             | NA             | NA                            | NA             | NA             | NA           | NA                | NA                | NA             | NA                            | 0.69           | -4.64          | 5.97         | VERY LOW          | NA             | NA               | NA                            | 0.69           | -4.64          | 5.97         | VERY LOW | RoB, Imprecisionx2   |  |                         |
|                             | remdesivir                                              | vitamin C                  | NA             | NA             | NA                            | NA             | NA             | NA           | NA                | NA                | NA             | NA                            | -0.41          | -6.06          | 5.19         | VERY LOW          | NA             | NA               | NA                            | -0.41          | -6.06          | 5.19         | VERY LOW | RoB, Imprecisionx2   |  |                         |
|                             | remdesivir                                              | vitamin D                  | NA             | NA             | NA                            | NA             | NA             | NA           | NA                | NA                | NA             | NA                            | 1.36           | -3.97          | 6.67         | VERY LOW          | NA             | NA               | NA                            | 1.36           | -3.97          | 6.67         | VERY LOW | RoB, Imprecisionx2   |  |                         |
|                             | serine protease inhibitors                              | statins                    | NA             | NA             | NA                            | NA             | NA             | NA           | NA                | NA                | NA             | NA                            | 0.51           | -6.58          | 7.63         | VERY LOW          | NA             | NA               | NA                            | 0.51           | -6.58          | 7.63         | VERY LOW | RoB, Imprecisionx2   |  |                         |
|                             | serine protease inhibitors                              | tyrosine kinase inhibitors | NA             | NA             | NA                            | NA             | NA             | NA           | NA                | NA                | NA             | NA                            | -1.14          | -10.03         | 7.76         | VERY LOW          | NA             | NA               | NA                            | -1.14          | -10.03         | 7.76         | VERY LOW | RoB, Imprecisionx2   |  |                         |
|                             | serine protease inhibitors                              | umifenovir                 | NA             | NA             | NA                            | NA             | NA             | NA           | NA                | NA                | NA             | NA                            | 0.77           | -5.95          | 7.47         | VERY LOW          | NA             | NA               | NA                            | 0.77           | -5.95          | 7.47         | VERY LOW | RoB, Imprecisionx2   |  |                         |
|                             | serine protease inhibitors                              | vitamin C                  | NA             | NA             | NA                            | NA             | NA             | NA           | NA                | NA                | NA             | NA                            | -0.33          | -7.28          | 6.69         | VERY LOW          | NA             | NA               | NA                            | -0.33          | -7.28          | 6.69         | VERY LOW | RoB, Imprecisionx2   |  |                         |
|                             | serine protease inhibitors                              | vitamin D                  | NA             | NA             | NA                            | NA             | NA             | NA           | NA                | NA                | NA             | NA                            | 1.42           | -5.33          | 8.2          | VERY LOW          | NA             | NA               | NA                            | 1.42           | -5.33          | 8.2          | VERY LOW | RoB, Imprecisionx2   |  |                         |
|                             | statins                                                 | tyrosine kinase inhibitors | NA             | NA             | NA                            | NA             | NA             | NA           | NA                | NA                | NA             | NA                            | -1.63          | -10.4          | 7.12         | VERY LOW          | NA             | NA               | NA                            | -1.63          | -10.4          | 7.12         | VERY LOW | RoB, Imprecisionx2   |  |                         |
|                             | statins                                                 | umifenovir                 | NA             | NA             | NA                            | NA             | NA             | NA           | NA                | NA                | NA             | NA                            | 0.25           | -6.32          | 6.76         | VERY LOW          | NA             | NA               | NA                            | 0.25           | -6.32          | 6.76         | VERY LOW | RoB, Imprecisionx2   |  |                         |
|                             | statins                                                 | vitamin C                  | NA             | NA             | NA                            | NA             | NA             | NA           | NA                | NA                | NA             | NA                            | -0.83          | -7.63          | 5.97         | VERY LOW          | NA             | NA               | NA                            | -0.83          | -7.63          | 5.97         | VERY LOW | RoB, Imprecisionx2   |  |                         |
|                             | statins                                                 | vitamin D                  | NA             | NA             | NA                            | NA             | NA             | NA           | NA                | NA                | NA             | NA                            | 0.92           | -5.66          | 7.51         | VERY LOW          | NA             | NA               | NA                            | 0.92           | -5.66          | 7.51         | VERY LOW | RoB, Imprecisionx2   |  |                         |
|                             | tyrosine kinase inhibitors                              | umifenovir                 | NA             | NA             | NA                            | NA             | NA             | NA           | NA                | NA                | NA             | NA                            | 1.89           | -6.52          | 10.3         | VERY LOW          | NA             | NA               | NA                            | 1.89           | -6.52          | 10.3         | VERY LOW | RoB, Imprecisionx2   |  |                         |
|                             | tyrosine kinase inhibitors                              | vitamin C                  | NA             | NA             | NA                            | NA             | NA             | NA           | NA                | NA                | NA             | NA                            | 0.82           | -7.85          | 9.43         | VERY LOW          | NA             | NA               | NA                            | 0.82           | -7.85          | 9.43         | VERY LOW | RoB, Imprecisionx2   |  |                         |
|                             | tyrosine kinase inhibitors                              | vitamin D                  | NA             | NA             | NA                            | NA             | NA             | NA           | NA                | NA                | NA             | NA                            | 2.59           | -5.85          | 11.03        | VERY LOW          | NA             | NA               | NA                            | 2.59           | -5.85          | 11.03        | VERY LOW | RoB, Imprecisionx2   |  |                         |
|                             | umifenovir                                              | vitamin C                  | NA             | NA             | NA                            | NA             | NA             | NA           | NA                | NA                | NA             | NA                            | -1.09          | -7.49          | 5.3          | VERY LOW          | NA             | NA               | NA                            | -1.09          | -7.49          | 5.3          | VERY LOW | RoB, Imprecisionx2   |  |                         |
|                             | umifenovir                                              | vitamin D                  | NA             | NA             | NA                            | NA             | NA             | NA           | NA                | NA                | NA             | NA                            | 0.67           | -5.45          | 6.83         | VERY LOW          | NA             | NA               | NA                            | 0.67           | -5.45          | 6.83         | VERY LOW | RoB, Imprecisionx2   |  |                         |
|                             | vitamin C                                               | vitamin D                  | NA             | NA             | NA                            | NA             | NA             | NA           | NA                | NA                | NA             | NA                            | 1.76           | -4.67          | 8.21         | VERY LOW          | NA             | NA               | NA                            | 1.76           | -4.67          | 8.21         | VERY LOW | RoB, Imprecisionx2   |  |                         |

Complete network meta-analysis results and GRADE

| Duration of mechanical ventilation                          |                                                             |                   |                |                |                               |                |                |              |                   |                |                |                               |                |                |              |                   |                |                |                               |                |                |              |                         |                    |
|-------------------------------------------------------------|-------------------------------------------------------------|-------------------|----------------|----------------|-------------------------------|----------------|----------------|--------------|-------------------|----------------|----------------|-------------------------------|----------------|----------------|--------------|-------------------|----------------|----------------|-------------------------------|----------------|----------------|--------------|-------------------------|--------------------|
| Comparison                                                  |                                                             | Direct estimate   |                |                |                               |                |                |              | Indirect estimate |                |                |                               |                |                |              | Network estimate  |                |                |                               |                |                |              | Reasons for downgrading |                    |
|                                                             |                                                             | Relative estimate |                |                | Absolute estimate (per 1,000) |                |                | Final rating | Relative estimate |                |                | Absolute estimate (per 1,000) |                |                | Final rating | Relative estimate |                |                | Absolute estimate (per 1,000) |                |                | Final rating |                         |                    |
|                                                             |                                                             | Point estimate    | CI lower limit | CI upper limit | Point estimate                | CI lower limit | CI upper limit |              | Point estimate    | CI lower limit | CI upper limit | Point estimate                | CI lower limit | CI upper limit |              | Point estimate    | CI lower limit | CI upper limit | Point estimate                | CI lower limit | CI upper limit |              |                         |                    |
| Treatment 1                                                 | Treatment 2                                                 |                   |                |                |                               |                |                |              |                   |                |                |                               |                |                |              |                   |                |                |                               |                |                |              |                         |                    |
| corticosteroids (systemic)                                  | standard care/placebo                                       | NA                | NA             | NA             | -1.4                          | -3.53          | 0.73           | LOW          | NA                | NA             | NA             | NA                            | NA             | NA             | NA           | NA                | NA             | NA             | NA                            | -1.41          | -3.39          | 0.61         | LOW                     | RoB, Imprecision   |
| IL6 receptor antagonists with corticosteroids (systemic)    | standard care/placebo                                       | NA                | NA             | NA             | -0.97                         | -2.24          | 0.29           | LOW          | NA                | NA             | NA             | NA                            | NA             | NA             | NA           | NA                | NA             | NA             | NA                            | -0.97          | -2.23          | 0.23         | LOW                     | RoB, Imprecision   |
| full-dose anticoagulant                                     | standard care/placebo                                       | NA                | NA             | NA             | -0.3                          | -1.76          | 1.16           | LOW          | NA                | NA             | NA             | NA                            | NA             | NA             | NA           | NA                | NA             | NA             | NA                            | -0.3           | -1.5           | 0.9          | LOW                     | RoB, Imprecision   |
| IL6 receptor antagonists without corticosteroids (systemic) | standard care/placebo                                       | NA                | NA             | NA             | -1.63                         | -3.35          | 0.08           | LOW          | NA                | NA             | NA             | NA                            | NA             | NA             | NA           | NA                | NA             | NA             | NA                            | -1.6           | -3.33          | 0.11         | LOW                     | RoB, Imprecision   |
| interferon beta (subcutaneous)                              | standard care/placebo                                       | NA                | NA             | NA             | 1.2                           | -0.43          | 2.86           | LOW          | NA                | NA             | NA             | NA                            | NA             | NA             | NA           | NA                | NA             | NA             | NA                            | 1.19           | -0.31          | 2.73         | LOW                     | RoB, Imprecision   |
| JAK inhibitors                                              | standard care/placebo                                       | NA                | NA             | NA             | -3.19                         | -5.9           | -0.48          | HIGH         | NA                | NA             | NA             | NA                            | NA             | NA             | NA           | NA                | NA             | NA             | NA                            | -3.24          | -5.89          | -0.53        | HIGH                    |                    |
| remdesivir                                                  | standard care/placebo                                       | NA                | NA             | NA             | -1.25                         | -3.97          | 1.45           | LOW          | NA                | NA             | NA             | NA                            | NA             | NA             | NA           | NA                | NA             | NA             | NA                            | -1.25          | -3.89          | 1.43         | LOW                     | Imprecisionx2      |
| corticosteroids (systemic)                                  | IL6 receptor antagonists with corticosteroids (systemic)    | NA                | NA             | NA             | NA                            | NA             | NA             | NA           | NA                | NA             | NA             | -0.42                         | -2.75          | 1.95           | LOW          | NA                | NA             | NA             | NA                            | -0.42          | -2.75          | 1.95         | LOW                     | RoB, Imprecision   |
| corticosteroids (systemic)                                  | full-dose anticoagulant                                     | NA                | NA             | NA             | NA                            | NA             | NA             | NA           | NA                | NA             | NA             | -1.1                          | -3.45          | 1.23           | LOW          | NA                | NA             | NA             | NA                            | -1.1           | -3.45          | 1.23         | LOW                     | RoB, Imprecision   |
| corticosteroids (systemic)                                  | IL6 receptor antagonists without corticosteroids (systemic) | NA                | NA             | NA             | NA                            | NA             | NA             | NA           | NA                | NA             | NA             | 0.2                           | -2.44          | 2.86           | LOW          | NA                | NA             | NA             | NA                            | 0.2            | -2.44          | 2.86         | LOW                     | RoB, Imprecision   |
| corticosteroids (systemic)                                  | interferon beta (subcutaneous)                              | NA                | NA             | NA             | NA                            | NA             | NA             | NA           | NA                | NA             | NA             | -2.58                         | -5.14          | -0.14          | MODERATE     | NA                | NA             | NA             | NA                            | -2.58          | -5.14          | -0.14        | MODERATE                | RoB                |
| corticosteroids (systemic)                                  | JAK inhibitors                                              | NA                | NA             | NA             | NA                            | NA             | NA             | NA           | NA                | NA             | NA             | 1.84                          | -1.52          | 5.13           | VERY LOW     | NA                | NA             | NA             | NA                            | 1.84           | -1.52          | 5.13         | VERY LOW                | RoB, Imprecisionx2 |
| corticosteroids (systemic)                                  | remdesivir                                                  | NA                | NA             | NA             | NA                            | NA             | NA             | NA           | NA                | NA             | NA             | -0.15                         | -3.52          | 3.19           | LOW          | NA                | NA             | NA             | NA                            | -0.15          | -3.52          | 3.19         | LOW                     | RoB, Imprecision   |
| IL6 receptor antagonists with corticosteroids (systemic)    | full-dose anticoagulant                                     | NA                | NA             | NA             | NA                            | NA             | NA             | NA           | NA                | NA             | NA             | -0.68                         | -2.42          | 1.01           | LOW          | NA                | NA             | NA             | NA                            | -0.68          | -2.42          | 1.01         | LOW                     | RoB, Imprecision   |
| IL6 receptor antagonists with corticosteroids (systemic)    | IL6 receptor antagonists without corticosteroids (systemic) | NA                | NA             | NA             | NA                            | NA             | NA             | NA           | NA                | NA             | NA             | 0.62                          | -1.51          | 2.72           | LOW          | NA                | NA             | NA             | NA                            | 0.62           | -1.51          | 2.72         | LOW                     | RoB, Imprecision   |
| IL6 receptor antagonists with corticosteroids (systemic)    | interferon beta (subcutaneous)                              | NA                | NA             | NA             | NA                            | NA             | NA             | NA           | NA                | NA             | NA             | -2.15                         | -4.21          | -0.28          | MODERATE     | NA                | NA             | NA             | NA                            | -2.15          | -4.21          | -0.28        | MODERATE                | RoB                |
| IL6 receptor antagonists with corticosteroids (systemic)    | JAK inhibitors                                              | NA                | NA             | NA             | NA                            | NA             | NA             | NA           | NA                | NA             | NA             | 2.25                          | -0.71          | 5.27           | VERY LOW     | NA                | NA             | NA             | NA                            | 2.25           | -0.71          | 5.27         | VERY LOW                | RoB, Imprecisionx2 |
| IL6 receptor antagonists with corticosteroids (systemic)    | remdesivir                                                  | NA                | NA             | NA             | NA                            | NA             | NA             | NA           | NA                | NA             | NA             | 0.27                          | -2.66          | 3.09           | LOW          | NA                | NA             | NA             | NA                            | 0.27           | -2.66          | 3.09         | LOW                     | RoB, Imprecision   |
| full-dose anticoagulant                                     | IL6 receptor antagonists without corticosteroids (systemic) | NA                | NA             | NA             | NA                            | NA             | NA             | NA           | NA                | NA             | NA             | 1.3                           | -0.81          | 3.43           | LOW          | NA                | NA             | NA             | NA                            | 1.3            | -0.81          | 3.43         | LOW                     | RoB, Imprecision   |
| full-dose anticoagulant                                     | interferon beta (subcutaneous)                              | NA                | NA             | NA             | NA                            | NA             | NA             | NA           | NA                | NA             | NA             | -1.49                         | -3.47          | 0.42           | LOW          | NA                | NA             | NA             | NA                            | -1.49          | -3.47          | 0.42         | LOW                     | RoB, Imprecision   |
| full-dose anticoagulant                                     | JAK inhibitors                                              | NA                | NA             | NA             | NA                            | NA             | NA             | NA           | NA                | NA             | NA             | 2.96                          | -0.03          | 5.84           | VERY LOW     | NA                | NA             | NA             | NA                            | 2.96           | -0.03          | 5.84         | VERY LOW                | RoB, Imprecisionx2 |
| full-dose anticoagulant                                     | remdesivir                                                  | NA                | NA             | NA             | NA                            | NA             | NA             | NA           | NA                | NA             | NA             | 0.96                          | -1.99          | 3.84           | LOW          | NA                | NA             | NA             | NA                            | 0.96           | -1.99          | 3.84         | LOW                     | RoB, Imprecision   |
| IL6 receptor antagonists without corticosteroids (systemic) | interferon beta (subcutaneous)                              | NA                | NA             | NA             | NA                            | NA             | NA             | NA           | NA                | NA             | NA             | -2.78                         | -5.13          | -0.55          | MODERATE     | NA                | NA             | NA             | NA                            | -2.78          | -5.13          | -0.55        | MODERATE                | RoB                |
| IL6 receptor antagonists without corticosteroids (systemic) | JAK inhibitors                                              | NA                | NA             | NA             | NA                            | NA             | NA             | NA           | NA                | NA             | NA             | 1.64                          | -1.61          | 4.85           | LOW          | NA                | NA             | NA             | NA                            | 1.64           | -1.61          | 4.85         | LOW                     | RoB, Imprecision   |
| IL6 receptor antagonists without corticosteroids (systemic) | remdesivir                                                  | NA                | NA             | NA             | NA                            | NA             | NA             | NA           | NA                | NA             | NA             | -0.38                         | -3.53          | 2.86           | LOW          | NA                | NA             | NA             | NA                            | -0.38          | -3.53          | 2.86         | LOW                     | RoB, Imprecision   |
| interferon beta (subcutaneous)                              | JAK inhibitors                                              | NA                | NA             | NA             | NA                            | NA             | NA             | NA           | NA                | NA             | NA             | 4.42                          | 1.39           | 7.48           | MODERATE     | NA                | NA             | NA             | NA                            | 4.42           | 1.39           | 7.48         | MODERATE                | RoB                |
| interferon beta (subcutaneous)                              | remdesivir                                                  | NA                | NA             | NA             | NA                            | NA             | NA             | NA           | NA                | NA             | NA             | 2.42E+00                      | -0.65          | 5.53           | VERY LOW     | NA                | NA             | NA             | NA                            | 2.42           | -0.65          | 5.53         | VERY LOW                | RoB, Imprecisionx2 |
| JAK inhibitors                                              | remdesivir                                                  | NA                | NA             | NA             | NA                            | NA             | NA             | NA           | NA                | NA             | NA             | -2.00E+00                     | -5.7           | 1.81           | LOW          | NA                | NA             | NA             | NA                            | -2             | -5.7           | 1.81         | LOW                     | Imprecisionx2      |





















| Comparison              |                                                         | Mechanical ventilation |                |                |                               |                |                |              |                   |                |                |                               |                |                |              |                   |                |                |                               |                |                | Network estimate  |                   |                 |                   |              |                         |                |  |  |  | Reasons for downgrading |
|-------------------------|---------------------------------------------------------|------------------------|----------------|----------------|-------------------------------|----------------|----------------|--------------|-------------------|----------------|----------------|-------------------------------|----------------|----------------|--------------|-------------------|----------------|----------------|-------------------------------|----------------|----------------|-------------------|-------------------|-----------------|-------------------|--------------|-------------------------|----------------|--|--|--|-------------------------|
|                         |                                                         | Direct estimate        |                |                |                               |                |                |              | Indirect estimate |                |                |                               |                |                |              |                   |                |                |                               |                |                |                   |                   |                 |                   |              |                         |                |  |  |  |                         |
|                         |                                                         | Relative estimate      |                |                | Absolute estimate (per 1,000) |                |                | Final rating | Relative estimate |                |                | Absolute estimate (per 1,000) |                |                | Final rating | Relative estimate |                |                | Absolute estimate (per 1,000) |                |                | GRADE             | Starting evidence | Starting rating | Incoherence       | Imprecision  | Final rating            |                |  |  |  |                         |
| Point estimate          | CI lower limit                                          | CI upper limit         | Point estimate | CI lower limit | CI upper limit                | Point estimate | CI lower limit |              | CI upper limit    | Point estimate | CI lower limit | CI upper limit                | Point estimate | CI lower limit |              | CI upper limit    | Point estimate | CI lower limit | CI upper limit                | Point estimate | CI lower limit |                   |                   |                 |                   |              |                         | CI upper limit |  |  |  |                         |
| Treatment 1             | Treatment 2                                             | Point estimate         | CI lower limit | CI upper limit | Point estimate                | CI lower limit | CI upper limit | Final rating | Point estimate    | CI lower limit | CI upper limit | Point estimate                | CI lower limit | CI upper limit | Final rating | Point estimate    | CI lower limit | CI upper limit | Point estimate                | CI lower limit | CI upper limit | Starting evidence | Starting rating   | Incoherence     | Imprecision       | Final rating | Reasons for downgrading |                |  |  |  |                         |
| full-dose anticoagulant | JAK inhibitors                                          | NA                     | NA             | NA             | NA                            | NA             | NA             | NA           | 0.84              | 0.4            | 1.74           | -11.06                        | -60.27         | 51.28          | VERY LOW     | 0.84              | 0.4            | 1.74           | -11.06                        | -60.27         | 51.28          | Indirect          | MODERATE          | Not serious     | Very serious      | VERY LOW     | RoB, Imprecisionx2      |                |  |  |  |                         |
| full-dose anticoagulant | lopinavir-ritonavir                                     | NA                     | NA             | NA             | NA                            | NA             | NA             | NA           | 0.58              | 0.28           | 1.17           | -46.31                        | -95.8          | 16.51          | VERY LOW     | 0.58              | 0.28           | 1.17           | -46.31                        | -95.8          | 16.51          | Indirect          | MODERATE          | Not serious     | Very serious      | VERY LOW     | RoB, Imprecisionx2      |                |  |  |  |                         |
| full-dose anticoagulant | molnupiravir                                            | NA                     | NA             | NA             | NA                            | NA             | NA             | NA           | 4.98E+05          | 0              | 1.84E+22       | -213.37                       | -947.77        | 133.03         | VERY LOW     | 4.98E+05          | 0              | 1.84E+22       | -213.37                       | -947.77        | 133.03         | Indirect          | MODERATE          | #N/A            | Extremely serious | MODERATE     | RoB, Imprecisionx3      |                |  |  |  |                         |
| full-dose anticoagulant | proxalutamide                                           | NA                     | NA             | NA             | NA                            | NA             | NA             | NA           | 10.57             | 3.38           | 37.5           | 73.01                         | 31.54          | 132.03         | VERY LOW     | 10.57             | 3.38           | 37.5           | 73.01                         | 31.54          | 132.03         | Indirect          | LOW               | Not serious     | Very serious      | VERY LOW     | RoBx2, Imprecisionx2    |                |  |  |  |                         |
| full-dose anticoagulant | recombinant human granulocyte colony-stimulating factor | NA                     | NA             | NA             | NA                            | NA             | NA             | NA           | 4.23              | 1.54           | 11.71          | 60.66                         | 15.41          | 120.84         | VERY LOW     | 4.23              | 1.54           | 11.71          | 60.66                         | 15.41          | 120.84         | Indirect          | MODERATE          | Not serious     | Very serious      | VERY LOW     | RoB, Imprecisionx2      |                |  |  |  |                         |
| full-dose anticoagulant | remdesivir                                              | NA                     | NA             | NA             | NA                            | NA             | NA             | NA           | 0.83              | 0.4            | 1.67           | -12.64                        | -59.55         | 49.6           | VERY LOW     | 0.83              | 0.4            | 1.67           | -12.64                        | -59.55         | 49.6           | Indirect          | MODERATE          | Not serious     | Very serious      | VERY LOW     | RoB, Imprecisionx2      |                |  |  |  |                         |
| full-dose anticoagulant | serine protease inhibitors                              | NA                     | NA             | NA             | NA                            | NA             | NA             | NA           | 0.26              | 0.05           | 1.1            | -194.12                       | -535.92        | 8.09           | VERY LOW     | 0.26              | 0.05           | 1.1            | -194.12                       | -535.92        | 8.09           | Indirect          | MODERATE          | #N/A            | Very serious      | VERY LOW     | RoB, Imprecisionx2      |                |  |  |  |                         |
| full-dose anticoagulant | SGLT2 inhibitors                                        | NA                     | NA             | NA             | NA                            | NA             | NA             | NA           | 0.8               | 0.33           | 1.87           | -16.79                        | -86.67         | 54.1           | VERY LOW     | 0.8               | 0.33           | 1.87           | -16.79                        | -86.67         | 54.1           | Indirect          | MODERATE          | #N/A            | Very serious      | VERY LOW     | RoB, Imprecisionx2      |                |  |  |  |                         |
| full-dose anticoagulant | statins                                                 | NA                     | NA             | NA             | NA                            | NA             | NA             | NA           | 0.52              | 0.15           | 1.83           | -70.35                        | -242.74        | 49             | VERY LOW     | 0.52              | 0.15           | 1.83           | -70.35                        | -242.74        | 49             | Indirect          | MODERATE          | Not serious     | Very serious      | VERY LOW     | RoB, Imprecisionx2      |                |  |  |  |                         |
| full-dose anticoagulant | sulodexide                                              | NA                     | NA             | NA             | NA                            | NA             | NA             | NA           | 1.37              | 0.27           | 8.79           | 10.02                         | -132.7         | 99.84          | VERY LOW     | 1.37              | 0.27           | 8.79           | 10.02                         | -132.7         | 99.84          | Indirect          | MODERATE          | Not serious     | Extremely serious | MODERATE     | RoB, Imprecisionx3      |                |  |  |  |                         |
| full-dose anticoagulant | tyrosine kinase inhibitors                              | NA                     | NA             | NA             | NA                            | NA             | NA             | NA           | 1.55              | 0.52           | 4.64           | 25.78                         | -44.43         | 94.71          | VERY LOW     | 1.55              | 0.52           | 4.64           | 25.78                         | -44.43         | 94.71          | Indirect          | MODERATE          | Not serious     | Very serious      | VERY LOW     | RoB, Imprecisionx2      |                |  |  |  |                         |
| full-dose anticoagulant | vitamin C                                               | NA                     | NA             | NA             | NA                            | NA             | NA             | NA           | 0.55              | 0.21           | 1.42           | -56.57                        | -155.78        | 29.47          | VERY LOW     | 0.55              | 0.21           | 1.42           | -56.57                        | -155.78        | 29.47          | Indirect          | MODERATE          | Not serious     | Very serious      | VERY LOW     | RoB, Imprecisionx2      |                |  |  |  |                         |
| full-dose anticoagulant | vitamin D                                               | NA                     | NA             | NA             | NA                            | NA             | NA             | NA           | 1.45              | 0.49           | 4.3            | 22.46                         | -47.16         | 91.46          | VERY LOW     | 1.45              | 0.49           | 4.3            | 22.46                         | -47.16         | 91.46          | Indirect          | MODERATE          | Not serious     | Very serious      | VERY LOW     | RoB, Imprecisionx2      |                |  |  |  |                         |
| GM-CSF inhibitor        | (hydroxy)chloroquine                                    | NA                     | NA             | NA             | NA                            | NA             | NA             | NA           | 0.72              | 0.33           | 1.58           | -30.83                        | -98.61         | 63.59          | VERY LOW     | 0.72              | 0.33           | 1.58           | -30.83                        | -98.61         | 63.59          | Indirect          | MODERATE          | #N/A            | Very serious      | VERY LOW     | RoB, Imprecisionx2      |                |  |  |  |                         |
| GM-CSF inhibitor        | IL1 inhibitors                                          | NA                     | NA             | NA             | NA                            | NA             | NA             | NA           | 1.15              | 0.44           | 3.03           | 15.57                         | -70.17         | 117.87         | VERY LOW     | 1.15              | 0.44           |                |                               |                |                |                   |                   |                 |                   |              |                         |                |  |  |  |                         |





[illegible]



















| Comparison     |                                                         | Mortality         |                |                |                               |                |              |                   |                   |                |                               |                |              |                   |                |                   |                               |                |              |                               |         | Network estimate |          |                    |  |  |  |  |  | Reasons for downgrading |
|----------------|---------------------------------------------------------|-------------------|----------------|----------------|-------------------------------|----------------|--------------|-------------------|-------------------|----------------|-------------------------------|----------------|--------------|-------------------|----------------|-------------------|-------------------------------|----------------|--------------|-------------------------------|---------|------------------|----------|--------------------|--|--|--|--|--|-------------------------|
|                |                                                         | Direct estimate   |                |                |                               |                |              |                   | Indirect estimate |                |                               |                |              |                   |                | Relative estimate |                               |                |              | Absolute estimate (per 1,000) |         |                  |          |                    |  |  |  |  |  |                         |
|                |                                                         | Relative estimate |                |                | Absolute estimate (per 1,000) |                | Final rating | Relative estimate |                   |                | Absolute estimate (per 1,000) |                | Final rating | Relative estimate |                |                   | Absolute estimate (per 1,000) |                | Final rating |                               |         |                  |          |                    |  |  |  |  |  |                         |
| Point estimate | CI lower limit                                          | CI upper limit    | Point estimate | CI lower limit | CI upper limit                | Point estimate |              | CI lower limit    | CI upper limit    | Point estimate | CI lower limit                | CI upper limit |              | Point estimate    | CI lower limit | CI upper limit    | Point estimate                | CI lower limit |              | CI upper limit                |         |                  |          |                    |  |  |  |  |  |                         |
| Treatment 1    | Treatment 2                                             | NA                | NA             | NA             | NA                            | NA             | NA           | NA                | NA                | 1.83           | 0.88                          | 3.74           | 49.05        | -9.78             | 94.6           | VERY LOW          | 1.83                          | 0.88           | 3.74         | 49.05                         | -9.78   | 94.6             | VERY LOW | RoB, Imprecisionx2 |  |  |  |  |  |                         |
| colchicine     | methylen blue                                           | NA                | NA             | NA             | NA                            | NA             | NA           | NA                | NA                | 14.43          | 2.16                          | 254.63         | 107.09       | 60.19             | 139.47         | VERY LOW          | 14.43                         | 2.16           | 254.63       | 107.09                        | 60.19   | 139.47           | VERY LOW | RoB, Imprecisionx3 |  |  |  |  |  |                         |
| colchicine     | molnupiravir                                            | NA                | NA             | NA             | NA                            | NA             | NA           | NA                | NA                | 1.69           | 0.42                          | 6.56           | 31.68        | -118.49           | 110.51         | VERY LOW          | 1.69                          | 0.42           | 6.56         | 31.68                         | -118.49 | 110.51           | VERY LOW | RoB, Imprecisionx2 |  |  |  |  |  |                         |
| colchicine     | nitazoxanide                                            | NA                | NA             | NA             | NA                            | NA             | NA           | NA                | NA                | 8.15           | 1.57                          | 68.84          | 99.57        | 39.15             | 136.19         | VERY LOW          | 8.15                          | 1.57           | 68.84        | 99.57                         | 39.15   | 136.19           | VERY LOW | RoB, Imprecisionx3 |  |  |  |  |  |                         |
| colchicine     | omega 3                                                 | NA                | NA             | NA             | NA                            | NA             | NA           | NA                | NA                | 2.51E+09       | 84.76                         | 8.03E+19       | 121.04       | 89.18             | 147.36         | VERY LOW          | 2.51E+09                      | 84.76          | 8.03E+19     | 121.04                        | 89.18   | 147.36           | VERY LOW | RoB, Imprecisionx3 |  |  |  |  |  |                         |
| colchicine     | nirmatrelvir/ritonavir                                  | NA                | NA             | NA             | NA                            | NA             | NA           | NA                | NA                | 0.95           | 0.19                          | 4.59           | -33.74       | -301.44           | 94.52          | VERY LOW          | 0.95                          | 0.19           | 4.59         | -33.74                        | -301.44 | 94.52            | VERY LOW | RoB, Imprecisionx2 |  |  |  |  |  |                         |
| colchicine     | probitotics                                             | NA                | NA             | NA             | NA                            | NA             | NA           | NA                | NA                | 7.45           | 4.14                          | 12.61          | 102.93       | 71.23             | 130.44         | VERY LOW          | 7.45                          | 4.14           | 12.61        | 102.93                        | 71.23   | 130.44           | VERY LOW | RoB, Imprecisionx2 |  |  |  |  |  |                         |
| colchicine     | proxalutamide                                           | NA                | NA             | NA             | NA                            | NA             | NA           | NA                | NA                | 4.85           | 1.37                          | 24.02          | 89.28        | 29.54             | 129.45         | VERY LOW          | 4.85                          | 1.37           | 24.02        | 89.28                         | 29.54   | 129.45           | VERY LOW | RoB, Imprecisionx2 |  |  |  |  |  |                         |
| colchicine     | recombinant human granulocyte colony-stimulating factor | NA                | NA             | NA             | NA                            | NA             | NA           | NA                | NA                | 1.02           | 0.68                          | 1.38           | 2.04         | -34.86            | 34.64          | LOW               | 1.02                          | 0.68           | 1.38         | 2.04                          | -34.86  | 34.64            | LOW      | RoB, Imprecision   |  |  |  |  |  |                         |
| colchicine     | remdesivir                                              | NA                | NA             | NA             | NA                            | NA             | NA           | NA                | NA                | 1.36           | 0.47                          | 4.01           | 22.37        | -95.84            | 92.98          | VERY LOW          | 1.36                          | 0.47           | 4.01         | 22.37                         | -95.84  | 92.98            | VERY LOW | RoB, Imprecisionx2 |  |  |  |  |  |                         |
| colchicine     | serine protease inhibitors                              | NA                | NA             | NA             | NA                            | NA             | NA           | NA                | NA                | 1.24           | 0.67                          | 2.13           | 19.61        | -39.3             | 66.52          | VERY LOW          | 1.24                          | 0.67           | 2.13         | 19.61                         | -39.3   | 66.52            | VERY LOW | RoB, Imprecisionx2 |  |  |  |  |  |                         |
| colchicine     | SGLT2 inhibitors                                        | NA                | NA             | NA             | NA                            | NA             | NA           | NA                | NA                | 0.68           | 0.23                          | 2.02           | -52.6        | -229.92           | 62.76          | VERY LOW          | 0.68                          | 0.23           | 2.02         | -52.6                         | -229.92 | 62.76            | VERY LOW | RoB, Imprecisionx2 |  |  |  |  |  |                         |
| colchicine     | statins                                                 | NA                | NA             | NA             | NA                            | NA             | NA           | NA                | NA                | 2.32           | 0.6                           | 11.37          | 56.8         | -58.63            | 118.3          | VERY LOW          | 2.32                          | 0.6            | 11.37        | 56.8                          | -58.63  | 118.3            | VERY LOW | RoB, Imprecisionx2 |  |  |  |  |  |                         |
| colchicine     | sulodexide                                              | NA                | NA             | NA             | NA                            | NA             | NA           | NA                | NA                | 0.79           | 0.36                          | 1.66           | -31.71       | -143.62           | 47.26          | VERY LOW          | 0.79                          | 0.36           | 1.66         | -31.71                        | -143.62 | 47.26            | VERY LOW | RoB, Imprecisionx2 |  |  |  |  |  |                         |
| colchicine     | synthetic VIP                                           | NA                | NA             | NA             | NA                            | NA             | NA           | NA                | NA                | 2.16           | 1.02                          | 4.5            | 59.02        | 2.55              | 101.35         | VERY LOW          | 2.16                          | 1.02           | 4.5          | 59.02                         | 2.55    | 101.35           | VERY LOW | RoB, Imprecisionx2 |  |  |  |  |  |                         |
| colchicine     | tyrosine kinase inhibitors                              | NA                | NA             | NA             | NA                            | NA             | NA           | NA                | NA                | 1.33           | 0.61                          | 2.82           | 21.63        | -65.66            | 82.03          | VERY LOW          | 1.33                          | 0.61           | 2.82         | 21.63                         | -65.66  | 82.03            | VERY LOW | RoB, Imprecisionx2 |  |  |  |  |  |                         |
| colchicine     | umifenovir                                              | NA                | NA             | NA             | NA                            | NA             | NA           | NA                | NA                | 1.44           | 0.68                          | 3.08           | 29.99        | -44.29            | 84.36          | VERY LOW          | 1.44                          | 0.68           | 3.08         | 29.99                         | -44.29  | 84.36            | VERY LOW | RoB, Imprecisionx2 |  |  |  |  |  |                         |
| colchicine     | vitamin C                                               | NA                | NA             | NA             | NA                            | NA             | NA           | NA                | NA                | 1.56           | 0.71                          | 3.38           | 33.5         | -38.97            | 87.83          | VERY LOW          |                               |                |              |                               |         |                  |          |                    |  |  |  |  |  |                         |























| Comparison  |             | Mortality         |                |                |                               |                |                |                |                   |                   |                |                |                               |                |                |                  |              |                   |                |                | Reasons for<br>downgrading |                               |  |              |  |  |  |  |  |  |  |  |  |  |  |  |  |  |  |  |  |  |  |  |  |  |  |  |  |  |  |  |  |  |  |  |  |  |  |  |  |  |  |  |  |  |  |  |  |  |  |  |  |  |  |  |  |  |  |  |  |  |  |  |  |  |  |  |  |  |  |  |  |  |  |  |  |  |  |  |  |  |  |  |  |  |  |  |  |  |  |  |  |  |  |  |  |  |  |  |  |  |  |  |  |  |  |  |  |  |  |  |  |  |  |  |  |  |  |  |  |  |  |  |  |  |  |  |  |  |  |  |  |  |  |  |  |  |  |  |  |  |  |  |  |  |  |  |  |  |  |  |  |  |  |  |  |  |  |  |  |  |  |  |  |  |  |  |  |  |  |  |  |  |  |  |  |  |  |  |  |  |  |  |  |  |  |  |  |  |  |  |  |  |  |  |  |  |  |  |  |  |  |  |  |  |  |  |  |  |  |  |  |  |  |  |  |  |  |  |  |  |  |  |  |  |  |  |  |  |  |  |  |  |  |  |  |  |  |  |  |  |  |  |  |  |  |  |  |  |  |  |  |  |  |  |  |  |  |  |  |  |  |  |  |  |  |  |  |  |  |  |  |  |  |  |  |  |  |  |  |  |  |  |  |  |  |  |  |  |  |  |  |  |  |  |  |  |  |  |  |  |  |  |  |  |  |  |  |  |  |  |  |  |  |  |  |  |  |  |  |  |  |  |  |  |  |  |  |  |  |  |  |  |  |  |  |  |  |  |  |  |  |  |  |  |  |  |  |  |  |  |  |  |  |  |  |  |  |  |  |  |  |  |  |  |  |  |  |  |  |  |  |  |  |  |  |  |  |  |  |  |  |  |  |  |  |  |  |  |  |  |  |  |  |  |  |  |  |  |  |  |  |  |  |  |  |  |  |  |  |  |  |  |  |  |  |  |  |  |  |  |  |  |  |  |  |  |  |  |  |  |  |  |  |  |  |  |  |  |  |  |  |  |  |  |  |  |  |  |  |  |  |  |  |  |  |  |  |  |  |  |  |  |  |  |  |  |  |  |  |  |  |  |  |  |  |  |  |  |  |  |  |  |  |  |  |  |  |  |  |  |  |  |  |  |  |  |  |  |  |  |  |  |  |  |  |  |  |  |  |  |  |  |  |  |  |  |  |  |  |  |  |  |  |  |  |  |  |  |  |  |  |  |  |  |  |  |  |  |  |  |  |  |  |  |  |  |  |  |  |  |  |  |  |  |  |  |  |  |  |  |  |  |  |  |  |  |  |  |  |  |  |  |  |  |  |  |  |  |  |  |  |  |  |  |  |  |  |  |  |  |  |  |  |  |  |  |  |  |  |  |  |  |  |  |  |  |  |  |  |  |  |  |  |  |  |  |  |  |  |  |  |  |  |  |  |  |  |  |  |  |  |  |  |  |  |  |  |  |  |  |  |  |  |  |  |  |  |  |  |  |  |  |  |  |  |  |  |  |  |  |  |  |  |  |  |  |  |  |  |  |  |  |  |  |  |  |  |  |  |  |  |  |  |  |  |  |  |  |  |  |  |  |  |  |  |  |  |  |  |  |  |  |  |  |  |  |  |  |  |  |  |  |  |  |  |  |  |  |  |  |  |  |  |  |  |  |  |  |  |  |  |  |  |  |  |  |  |  |  |  |  |  |  |  |  |  |  |  |  |  |  |  |  |  |  |  |  |  |  |  |  |  |  |  |  |  |  |  |  |  |  |  |  |  |  |  |  |  |  |  |  |  |  |  |  |  |  |  |  |  |  |  |  |  |  |  |  |  |  |  |  |  |  |  |  |  |  |  |  |  |  |  |  |  |  |  |  |  |  |  |  |  |  |  |  |  |  |  |  |  |  |  |  |  |  |  |  |  |  |  |  |  |  |  |  |  |  |  |  |  |  |  |  |  |  |  |  |  |  |  |  |  |  |  |  |  |  |  |  |  |  |  |  |  |  |  |  |  |  |  |  |  |  |  |  |  |  |  |  |  |  |  |  |  |  |  |  |  |  |  |  |  |  |  |  |  |  |  |  |  |  |  |  |  |  |  |  |  |  |  |  |  |  |  |  |  |  |  |  |  |  |  |  |  |  |  |  |  |  |  |  |  |  |  |  |  |  |  |  |  |  |  |  |  |  |  |  |  |  |  |  |  |  |  |  |  |  |  |  |  |  |  |  |  |  |  |  |  |  |  |  |  |  |  |  |  |  |  |  |  |  |  |  |  |  |  |  |  |  |  |  |  |  |  |  |  |  |  |  |  |  |  |  |  |  |  |  |  |  |  |  |  |  |  |  |  |  |  |  |  |  |  |  |  |  |  |  |  |  |  |  |  |  |  |  |  |  |  |  |  |  |  |  |  |  |  |  |  |  |  |  |  |  |  |  |  |  |  |  |  |  |  |  |  |  |  |  |  |  |  |  |  |  |  |  |  |  |  |  |  |  |  |  |  |  |  |  |  |  |  |  |  |  |  |  |  |  |  |  |  |  |  |  |  |  |  |  |  |  |  |  |  |  |  |  |  |  |  |  |  |  |  |  |  |  |  |  |  |  |  |  |  |  |  |  |  |  |  |  |  |  |  |  |  |  |  |  |  |  |  |  |  |  |  |  |  |  |  |  |  |  |  |  |  |  |  |  |  |  |  |  |  |  |  |  |  |  |  |  |  |  |  |  |  |  |  |  |  |  |  |  |  |  |  |  |  |  |  |  |  |  |  |  |  |  |  |  |  |  |  |  |  |  |  |  |  |  |  |  |  |  |  |  |  |  |  |  |  |  |  |  |  |  |  |  |  |  |  |  |  |  |  |  |  |  |  |  |  |  |  |  |  |  |  |  |  |  |  |  |  |  |  |  |  |  |  |  |  |
|-------------|-------------|-------------------|----------------|----------------|-------------------------------|----------------|----------------|----------------|-------------------|-------------------|----------------|----------------|-------------------------------|----------------|----------------|------------------|--------------|-------------------|----------------|----------------|----------------------------|-------------------------------|--|--------------|--|--|--|--|--|--|--|--|--|--|--|--|--|--|--|--|--|--|--|--|--|--|--|--|--|--|--|--|--|--|--|--|--|--|--|--|--|--|--|--|--|--|--|--|--|--|--|--|--|--|--|--|--|--|--|--|--|--|--|--|--|--|--|--|--|--|--|--|--|--|--|--|--|--|--|--|--|--|--|--|--|--|--|--|--|--|--|--|--|--|--|--|--|--|--|--|--|--|--|--|--|--|--|--|--|--|--|--|--|--|--|--|--|--|--|--|--|--|--|--|--|--|--|--|--|--|--|--|--|--|--|--|--|--|--|--|--|--|--|--|--|--|--|--|--|--|--|--|--|--|--|--|--|--|--|--|--|--|--|--|--|--|--|--|--|--|--|--|--|--|--|--|--|--|--|--|--|--|--|--|--|--|--|--|--|--|--|--|--|--|--|--|--|--|--|--|--|--|--|--|--|--|--|--|--|--|--|--|--|--|--|--|--|--|--|--|--|--|--|--|--|--|--|--|--|--|--|--|--|--|--|--|--|--|--|--|--|--|--|--|--|--|--|--|--|--|--|--|--|--|--|--|--|--|--|--|--|--|--|--|--|--|--|--|--|--|--|--|--|--|--|--|--|--|--|--|--|--|--|--|--|--|--|--|--|--|--|--|--|--|--|--|--|--|--|--|--|--|--|--|--|--|--|--|--|--|--|--|--|--|--|--|--|--|--|--|--|--|--|--|--|--|--|--|--|--|--|--|--|--|--|--|--|--|--|--|--|--|--|--|--|--|--|--|--|--|--|--|--|--|--|--|--|--|--|--|--|--|--|--|--|--|--|--|--|--|--|--|--|--|--|--|--|--|--|--|--|--|--|--|--|--|--|--|--|--|--|--|--|--|--|--|--|--|--|--|--|--|--|--|--|--|--|--|--|--|--|--|--|--|--|--|--|--|--|--|--|--|--|--|--|--|--|--|--|--|--|--|--|--|--|--|--|--|--|--|--|--|--|--|--|--|--|--|--|--|--|--|--|--|--|--|--|--|--|--|--|--|--|--|--|--|--|--|--|--|--|--|--|--|--|--|--|--|--|--|--|--|--|--|--|--|--|--|--|--|--|--|--|--|--|--|--|--|--|--|--|--|--|--|--|--|--|--|--|--|--|--|--|--|--|--|--|--|--|--|--|--|--|--|--|--|--|--|--|--|--|--|--|--|--|--|--|--|--|--|--|--|--|--|--|--|--|--|--|--|--|--|--|--|--|--|--|--|--|--|--|--|--|--|--|--|--|--|--|--|--|--|--|--|--|--|--|--|--|--|--|--|--|--|--|--|--|--|--|--|--|--|--|--|--|--|--|--|--|--|--|--|--|--|--|--|--|--|--|--|--|--|--|--|--|--|--|--|--|--|--|--|--|--|--|--|--|--|--|--|--|--|--|--|--|--|--|--|--|--|--|--|--|--|--|--|--|--|--|--|--|--|--|--|--|--|--|--|--|--|--|--|--|--|--|--|--|--|--|--|--|--|--|--|--|--|--|--|--|--|--|--|--|--|--|--|--|--|--|--|--|--|--|--|--|--|--|--|--|--|--|--|--|--|--|--|--|--|--|--|--|--|--|--|--|--|--|--|--|--|--|--|--|--|--|--|--|--|--|--|--|--|--|--|--|--|--|--|--|--|--|--|--|--|--|--|--|--|--|--|--|--|--|--|--|--|--|--|--|--|--|--|--|--|--|--|--|--|--|--|--|--|--|--|--|--|--|--|--|--|--|--|--|--|--|--|--|--|--|--|--|--|--|--|--|--|--|--|--|--|--|--|--|--|--|--|--|--|--|--|--|--|--|--|--|--|--|--|--|--|--|--|--|--|--|--|--|--|--|--|--|--|--|--|--|--|--|--|--|--|--|--|--|--|--|--|--|--|--|--|--|--|--|--|--|--|--|--|--|--|--|--|--|--|--|--|--|--|--|--|--|--|--|--|--|--|--|--|--|--|--|--|--|--|--|--|--|--|--|--|--|--|--|--|--|--|--|--|--|--|--|--|--|--|--|--|--|--|--|--|--|--|--|--|--|--|--|--|--|--|--|--|--|--|--|--|--|--|--|--|--|--|--|--|--|--|--|--|--|--|--|--|--|--|--|--|--|--|--|--|--|--|--|--|--|--|--|--|--|--|--|--|--|--|--|--|--|--|--|--|--|--|--|--|--|--|--|--|--|--|--|--|--|--|--|--|--|--|--|--|--|--|--|--|--|--|--|--|--|--|--|--|--|--|--|--|--|--|--|--|--|--|--|--|--|--|--|--|--|--|--|--|--|--|--|--|--|--|--|--|--|--|--|--|--|--|--|--|--|--|--|--|--|--|--|--|--|--|--|--|--|--|--|--|--|--|--|--|--|--|--|--|--|--|--|--|--|--|--|--|--|--|--|--|--|--|--|--|--|--|--|--|--|--|--|--|--|--|--|--|--|--|--|--|--|--|--|--|--|--|--|--|--|--|--|--|--|--|--|--|--|--|--|--|--|--|--|--|--|--|--|--|--|--|--|--|--|--|--|--|--|--|--|--|--|--|--|--|--|--|--|--|--|--|--|--|--|--|--|--|--|--|--|--|--|--|--|--|--|--|--|--|--|--|--|--|--|--|--|--|--|--|--|--|--|--|--|--|--|--|--|--|--|--|--|--|--|--|--|--|--|--|--|--|--|--|--|--|--|--|--|--|--|--|--|--|--|--|--|--|--|--|--|--|--|--|--|--|--|--|--|--|--|--|--|--|--|--|--|--|--|--|--|--|--|--|--|--|--|--|--|--|--|--|--|--|--|--|--|--|--|--|--|--|--|--|--|--|--|--|--|--|--|--|--|--|--|--|--|--|--|--|--|--|--|--|--|--|--|--|
|             |             | Direct estimate   |                |                |                               |                |                |                | Indirect estimate |                   |                |                |                               |                |                | Network estimate |              |                   |                |                |                            |                               |  |              |  |  |  |  |  |  |  |  |  |  |  |  |  |  |  |  |  |  |  |  |  |  |  |  |  |  |  |  |  |  |  |  |  |  |  |  |  |  |  |  |  |  |  |  |  |  |  |  |  |  |  |  |  |  |  |  |  |  |  |  |  |  |  |  |  |  |  |  |  |  |  |  |  |  |  |  |  |  |  |  |  |  |  |  |  |  |  |  |  |  |  |  |  |  |  |  |  |  |  |  |  |  |  |  |  |  |  |  |  |  |  |  |  |  |  |  |  |  |  |  |  |  |  |  |  |  |  |  |  |  |  |  |  |  |  |  |  |  |  |  |  |  |  |  |  |  |  |  |  |  |  |  |  |  |  |  |  |  |  |  |  |  |  |  |  |  |  |  |  |  |  |  |  |  |  |  |  |  |  |  |  |  |  |  |  |  |  |  |  |  |  |  |  |  |  |  |  |  |  |  |  |  |  |  |  |  |  |  |  |  |  |  |  |  |  |  |  |  |  |  |  |  |  |  |  |  |  |  |  |  |  |  |  |  |  |  |  |  |  |  |  |  |  |  |  |  |  |  |  |  |  |  |  |  |  |  |  |  |  |  |  |  |  |  |  |  |  |  |  |  |  |  |  |  |  |  |  |  |  |  |  |  |  |  |  |  |  |  |  |  |  |  |  |  |  |  |  |  |  |  |  |  |  |  |  |  |  |  |  |  |  |  |  |  |  |  |  |  |  |  |  |  |  |  |  |  |  |  |  |  |  |  |  |  |  |  |  |  |  |  |  |  |  |  |  |  |  |  |  |  |  |  |  |  |  |  |  |  |  |  |  |  |  |  |  |  |  |  |  |  |  |  |  |  |  |  |  |  |  |  |  |  |  |  |  |  |  |  |  |  |  |  |  |  |  |  |  |  |  |  |  |  |  |  |  |  |  |  |  |  |  |  |  |  |  |  |  |  |  |  |  |  |  |  |  |  |  |  |  |  |  |  |  |  |  |  |  |  |  |  |  |  |  |  |  |  |  |  |  |  |  |  |  |  |  |  |  |  |  |  |  |  |  |  |  |  |  |  |  |  |  |  |  |  |  |  |  |  |  |  |  |  |  |  |  |  |  |  |  |  |  |  |  |  |  |  |  |  |  |  |  |  |  |  |  |  |  |  |  |  |  |  |  |  |  |  |  |  |  |  |  |  |  |  |  |  |  |  |  |  |  |  |  |  |  |  |  |  |  |  |  |  |  |  |  |  |  |  |  |  |  |  |  |  |  |  |  |  |  |  |  |  |  |  |  |  |  |  |  |  |  |  |  |  |  |  |  |  |  |  |  |  |  |  |  |  |  |  |  |  |  |  |  |  |  |  |  |  |  |  |  |  |  |  |  |  |  |  |  |  |  |  |  |  |  |  |  |  |  |  |  |  |  |  |  |  |  |  |  |  |  |  |  |  |  |  |  |  |  |  |  |  |  |  |  |  |  |  |  |  |  |  |  |  |  |  |  |  |  |  |  |  |  |  |  |  |  |  |  |  |  |  |  |  |  |  |  |  |  |  |  |  |  |  |  |  |  |  |  |  |  |  |  |  |  |  |  |  |  |  |  |  |  |  |  |  |  |  |  |  |  |  |  |  |  |  |  |  |  |  |  |  |  |  |  |  |  |  |  |  |  |  |  |  |  |  |  |  |  |  |  |  |  |  |  |  |  |  |  |  |  |  |  |  |  |  |  |  |  |  |  |  |  |  |  |  |  |  |  |  |  |  |  |  |  |  |  |  |  |  |  |  |  |  |  |  |  |  |  |  |  |  |  |  |  |  |  |  |  |  |  |  |  |  |  |  |  |  |  |  |  |  |  |  |  |  |  |  |  |  |  |  |  |  |  |  |  |  |  |  |  |  |  |  |  |  |  |  |  |  |  |  |  |  |  |  |  |  |  |  |  |  |  |  |  |  |  |  |  |  |  |  |  |  |  |  |  |  |  |  |  |  |  |  |  |  |  |  |  |  |  |  |  |  |  |  |  |  |  |  |  |  |  |  |  |  |  |  |  |  |  |  |  |  |  |  |  |  |  |  |  |  |  |  |  |  |  |  |  |  |  |  |  |  |  |  |  |  |  |  |  |  |  |  |  |  |  |  |  |  |  |  |  |  |  |  |  |  |  |  |  |  |  |  |  |  |  |  |  |  |  |  |  |  |  |  |  |  |  |  |  |  |  |  |  |  |  |  |  |  |  |  |  |  |  |  |  |  |  |  |  |  |  |  |  |  |  |  |  |  |  |  |  |  |  |  |  |  |  |  |  |  |  |  |  |  |  |  |  |  |  |  |  |  |  |  |  |  |  |  |  |  |  |  |  |  |  |  |  |  |  |  |  |  |  |  |  |  |  |  |  |  |  |  |  |  |  |  |  |  |  |  |  |  |  |  |  |  |  |  |  |  |  |  |  |  |  |  |  |  |  |  |  |  |  |  |  |  |  |  |  |  |  |  |  |  |  |  |  |  |  |  |  |  |  |  |  |  |  |  |  |  |  |  |  |  |  |  |  |  |  |  |  |  |  |  |  |  |  |  |  |  |  |  |  |  |  |  |  |  |  |  |  |  |  |  |  |  |  |  |  |  |  |  |  |  |  |  |  |  |  |  |  |  |  |  |  |  |  |  |  |  |  |  |  |  |  |  |  |  |  |  |  |  |  |  |  |  |  |  |  |  |  |  |  |  |  |  |  |  |  |  |  |  |  |  |  |  |  |  |  |  |  |  |  |  |  |  |  |  |  |  |  |  |  |  |  |  |  |  |  |  |  |  |  |  |  |  |  |  |  |  |  |  |  |  |  |  |  |  |  |  |  |  |  |  |  |  |  |  |  |  |  |  |  |  |  |  |  |  |  |  |  |  |  |  |
|             |             | Relative estimate |                |                | Absolute estimate (per 1,000) |                |                |                | Final rating      | Relative estimate |                |                | Absolute estimate (per 1,000) |                |                |                  | Final rating | Relative estimate |                |                |                            | Absolute estimate (per 1,000) |  | Final rating |  |  |  |  |  |  |  |  |  |  |  |  |  |  |  |  |  |  |  |  |  |  |  |  |  |  |  |  |  |  |  |  |  |  |  |  |  |  |  |  |  |  |  |  |  |  |  |  |  |  |  |  |  |  |  |  |  |  |  |  |  |  |  |  |  |  |  |  |  |  |  |  |  |  |  |  |  |  |  |  |  |  |  |  |  |  |  |  |  |  |  |  |  |  |  |  |  |  |  |  |  |  |  |  |  |  |  |  |  |  |  |  |  |  |  |  |  |  |  |  |  |  |  |  |  |  |  |  |  |  |  |  |  |  |  |  |  |  |  |  |  |  |  |  |  |  |  |  |  |  |  |  |  |  |  |  |  |  |  |  |  |  |  |  |  |  |  |  |  |  |  |  |  |  |  |  |  |  |  |  |  |  |  |  |  |  |  |  |  |  |  |  |  |  |  |  |  |  |  |  |  |  |  |  |  |  |  |  |  |  |  |  |  |  |  |  |  |  |  |  |  |  |  |  |  |  |  |  |  |  |  |  |  |  |  |  |  |  |  |  |  |  |  |  |  |  |  |  |  |  |  |  |  |  |  |  |  |  |  |  |  |  |  |  |  |  |  |  |  |  |  |  |  |  |  |  |  |  |  |  |  |  |  |  |  |  |  |  |  |  |  |  |  |  |  |  |  |  |  |  |  |  |  |  |  |  |  |  |  |  |  |  |  |  |  |  |  |  |  |  |  |  |  |  |  |  |  |  |  |  |  |  |  |  |  |  |  |  |  |  |  |  |  |  |  |  |  |  |  |  |  |  |  |  |  |  |  |  |  |  |  |  |  |  |  |  |  |  |  |  |  |  |  |  |  |  |  |  |  |  |  |  |  |  |  |  |  |  |  |  |  |  |  |  |  |  |  |  |  |  |  |  |  |  |  |  |  |  |  |  |  |  |  |  |  |  |  |  |  |  |  |  |  |  |  |  |  |  |  |  |  |  |  |  |  |  |  |  |  |  |  |  |  |  |  |  |  |  |  |  |  |  |  |  |  |  |  |  |  |  |  |  |  |  |  |  |  |  |  |  |  |  |  |  |  |  |  |  |  |  |  |  |  |  |  |  |  |  |  |  |  |  |  |  |  |  |  |  |  |  |  |  |  |  |  |  |  |  |  |  |  |  |  |  |  |  |  |  |  |  |  |  |  |  |  |  |  |  |  |  |  |  |  |  |  |  |  |  |  |  |  |  |  |  |  |  |  |  |  |  |  |  |  |  |  |  |  |  |  |  |  |  |  |  |  |  |  |  |  |  |  |  |  |  |  |  |  |  |  |  |  |  |  |  |  |  |  |  |  |  |  |  |  |  |  |  |  |  |  |  |  |  |  |  |  |  |  |  |  |  |  |  |  |  |  |  |  |  |  |  |  |  |  |  |  |  |  |  |  |  |  |  |  |  |  |  |  |  |  |  |  |  |  |  |  |  |  |  |  |  |  |  |  |  |  |  |  |  |  |  |  |  |  |  |  |  |  |  |  |  |  |  |  |  |  |  |  |  |  |  |  |  |  |  |  |  |  |  |  |  |  |  |  |  |  |  |  |  |  |  |  |  |  |  |  |  |  |  |  |  |  |  |  |  |  |  |  |  |  |  |  |  |  |  |  |  |  |  |  |  |  |  |  |  |  |  |  |  |  |  |  |  |  |  |  |  |  |  |  |  |  |  |  |  |  |  |  |  |  |  |  |  |  |  |  |  |  |  |  |  |  |  |  |  |  |  |  |  |  |  |  |  |  |  |  |  |  |  |  |  |  |  |  |  |  |  |  |  |  |  |  |  |  |  |  |  |  |  |  |  |  |  |  |  |  |  |  |  |  |  |  |  |  |  |  |  |  |  |  |  |  |  |  |  |  |  |  |  |  |  |  |  |  |  |  |  |  |  |  |  |  |  |  |  |  |  |  |  |  |  |  |  |  |  |  |  |  |  |  |  |  |  |  |  |  |  |  |  |  |  |  |  |  |  |  |  |  |  |  |  |  |  |  |  |  |  |  |  |  |  |  |  |  |  |  |  |  |  |  |  |  |  |  |  |  |  |  |  |  |  |  |  |  |  |  |  |  |  |  |  |  |  |  |  |  |  |  |  |  |  |  |  |  |  |  |  |  |  |  |  |  |  |  |  |  |  |  |  |  |  |  |  |  |  |  |  |  |  |  |  |  |  |  |  |  |  |  |  |  |  |  |  |  |  |  |  |  |  |  |  |  |  |  |  |  |  |  |  |  |  |  |  |  |  |  |  |  |  |  |  |  |  |  |  |  |  |  |  |  |  |  |  |  |  |  |  |  |  |  |  |  |  |  |  |  |  |  |  |  |  |  |  |  |  |  |  |  |  |  |  |  |  |  |  |  |  |  |  |  |  |  |  |  |  |  |  |  |  |  |  |  |  |  |  |  |  |  |  |  |  |  |  |  |  |  |  |  |  |  |  |  |  |  |  |  |  |  |  |  |  |  |  |  |  |  |  |  |  |  |  |  |  |  |  |  |  |  |  |  |  |  |  |  |  |  |  |  |  |  |  |  |  |  |  |  |  |  |  |  |  |  |  |  |  |  |  |  |  |  |  |  |  |  |  |  |  |  |  |  |  |  |  |  |  |  |  |  |  |  |  |  |  |  |  |  |  |  |  |  |  |  |  |  |  |  |  |  |  |  |  |  |  |  |  |  |  |  |  |  |  |  |  |  |  |  |  |  |  |  |  |  |  |  |  |  |  |  |  |  |  |  |  |  |  |  |  |  |  |  |  |  |  |  |  |  |  |  |  |  |  |  |  |  |  |  |  |  |  |  |  |  |  |  |  |  |  |  |  |  |  |  |  |  |  |  |  |  |  |  |  |  |  |  |  |  |  |
|             |             | Point estimate    | CI lower limit | CI upper limit | Point estimate                | CI lower limit | CI upper limit | Point estimate |                   | CI lower limit    | CI upper limit | Point estimate | CI lower limit                | CI upper limit | Point estimate | CI lower limit   |              | CI upper limit    | Point estimate | CI lower limit |                            | CI upper limit                |  |              |  |  |  |  |  |  |  |  |  |  |  |  |  |  |  |  |  |  |  |  |  |  |  |  |  |  |  |  |  |  |  |  |  |  |  |  |  |  |  |  |  |  |  |  |  |  |  |  |  |  |  |  |  |  |  |  |  |  |  |  |  |  |  |  |  |  |  |  |  |  |  |  |  |  |  |  |  |  |  |  |  |  |  |  |  |  |  |  |  |  |  |  |  |  |  |  |  |  |  |  |  |  |  |  |  |  |  |  |  |  |  |  |  |  |  |  |  |  |  |  |  |  |  |  |  |  |  |  |  |  |  |  |  |  |  |  |  |  |  |  |  |  |  |  |  |  |  |  |  |  |  |  |  |  |  |  |  |  |  |  |  |  |  |  |  |  |  |  |  |  |  |  |  |  |  |  |  |  |  |  |  |  |  |  |  |  |  |  |  |  |  |  |  |  |  |  |  |  |  |  |  |  |  |  |  |  |  |  |  |  |  |  |  |  |  |  |  |  |  |  |  |  |  |  |  |  |  |  |  |  |  |  |  |  |  |  |  |  |  |  |  |  |  |  |  |  |  |  |  |  |  |  |  |  |  |  |  |  |  |  |  |  |  |  |  |  |  |  |  |  |  |  |  |  |  |  |  |  |  |  |  |  |  |  |  |  |  |  |  |  |  |  |  |  |  |  |  |  |  |  |  |  |  |  |  |  |  |  |  |  |  |  |  |  |  |  |  |  |  |  |  |  |  |  |  |  |  |  |  |  |  |  |  |  |  |  |  |  |  |  |  |  |  |  |  |  |  |  |  |  |  |  |  |  |  |  |  |  |  |  |  |  |  |  |  |  |  |  |  |  |  |  |  |  |  |  |  |  |  |  |  |  |  |  |  |  |  |  |  |  |  |  |  |  |  |  |  |  |  |  |  |  |  |  |  |  |  |  |  |  |  |  |  |  |  |  |  |  |  |  |  |  |  |  |  |  |  |  |  |  |  |  |  |  |  |  |  |  |  |  |  |  |  |  |  |  |  |  |  |  |  |  |  |  |  |  |  |  |  |  |  |  |  |  |  |  |  |  |  |  |  |  |  |  |  |  |  |  |  |  |  |  |  |  |  |  |  |  |  |  |  |  |  |  |  |  |  |  |  |  |  |  |  |  |  |  |  |  |  |  |  |  |  |  |  |  |  |  |  |  |  |  |  |  |  |  |  |  |  |  |  |  |  |  |  |  |  |  |  |  |  |  |  |  |  |  |  |  |  |  |  |  |  |  |  |  |  |  |  |  |  |  |  |  |  |  |  |  |  |  |  |  |  |  |  |  |  |  |  |  |  |  |  |  |  |  |  |  |  |  |  |  |  |  |  |  |  |  |  |  |  |  |  |  |  |  |  |  |  |  |  |  |  |  |  |  |  |  |  |  |  |  |  |  |  |  |  |  |  |  |  |  |  |  |  |  |  |  |  |  |  |  |  |  |  |  |  |  |  |  |  |  |  |  |  |  |  |  |  |  |  |  |  |  |  |  |  |  |  |  |  |  |  |  |  |  |  |  |  |  |  |  |  |  |  |  |  |  |  |  |  |  |  |  |  |  |  |  |  |  |  |  |  |  |  |  |  |  |  |  |  |  |  |  |  |  |  |  |  |  |  |  |  |  |  |  |  |  |  |  |  |  |  |  |  |  |  |  |  |  |  |  |  |  |  |  |  |  |  |  |  |  |  |  |  |  |  |  |  |  |  |  |  |  |  |  |  |  |  |  |  |  |  |  |  |  |  |  |  |  |  |  |  |  |  |  |  |  |  |  |  |  |  |  |  |  |  |  |  |  |  |  |  |  |  |  |  |  |  |  |  |  |  |  |  |  |  |  |  |  |  |  |  |  |  |  |  |  |  |  |  |  |  |  |  |  |  |  |  |  |  |  |  |  |  |  |  |  |  |  |  |  |  |  |  |  |  |  |  |  |  |  |  |  |  |  |  |  |  |  |  |  |  |  |  |  |  |  |  |  |  |  |  |  |  |  |  |  |  |  |  |  |  |  |  |  |  |  |  |  |  |  |  |  |  |  |  |  |  |  |  |  |  |  |  |  |  |  |  |  |  |  |  |  |  |  |  |  |  |  |  |  |  |  |  |  |  |  |  |  |  |  |  |  |  |  |  |  |  |  |  |  |  |  |  |  |  |  |  |  |  |  |  |  |  |  |  |  |  |  |  |  |  |  |  |  |  |  |  |  |  |  |  |  |  |  |  |  |  |  |  |  |  |  |  |  |  |  |  |  |  |  |  |  |  |  |  |  |  |  |  |  |  |  |  |  |  |  |  |  |  |  |  |  |  |  |  |  |  |  |  |  |  |  |  |  |  |  |  |  |  |  |  |  |  |  |  |  |  |  |  |  |  |  |  |  |  |  |  |  |  |  |  |  |  |  |  |  |  |  |  |  |  |  |  |  |  |  |  |  |  |  |  |  |  |  |  |  |  |  |  |  |  |  |  |  |  |  |  |  |  |  |  |  |  |  |  |  |  |  |  |  |  |  |  |  |  |  |  |  |  |  |  |  |  |  |  |  |  |  |  |  |  |  |  |  |  |  |  |  |  |  |  |  |  |  |  |  |  |  |  |  |  |  |  |  |  |  |  |  |  |  |  |  |  |  |  |  |  |  |  |  |  |  |  |  |  |  |  |  |  |  |  |  |  |  |  |  |  |  |  |  |  |  |  |  |  |  |  |  |  |  |  |  |  |  |  |  |  |  |  |  |  |  |  |  |  |  |  |  |  |  |  |  |  |  |  |  |  |  |  |  |  |  |  |  |  |  |  |  |  |  |  |  |  |  |  |  |  |  |  |  |  |  |  |  |  |  |  |  |  |  |  |  |  |  |  |  |  |  |  |  |  |  |  |  |
| Treatment 1 | Treatment 2 |                   |                |                |                               |                |                |                |                   |                   |                |                |                               |                |                |                  |              |                   |                |                |                            |                               |  |              |  |  |  |  |  |  |  |  |  |  |  |  |  |  |  |  |  |  |  |  |  |  |  |  |  |  |  |  |  |  |  |  |  |  |  |  |  |  |  |  |  |  |  |  |  |  |  |  |  |  |  |  |  |  |  |  |  |  |  |  |  |  |  |  |  |  |  |  |  |  |  |  |  |  |  |  |  |  |  |  |  |  |  |  |  |  |  |  |  |  |  |  |  |  |  |  |  |  |  |  |  |  |  |  |  |  |  |  |  |  |  |  |  |  |  |  |  |  |  |  |  |  |  |  |  |  |  |  |  |  |  |  |  |  |  |  |  |  |  |  |  |  |  |  |  |  |  |  |  |  |  |  |  |  |  |  |  |  |  |  |  |  |  |  |  |  |  |  |  |  |  |  |  |  |  |  |  |  |  |  |  |  |  |  |  |  |  |  |  |  |  |  |  |  |  |  |  |  |  |  |  |  |  |  |  |  |  |  |  |  |  |  |  |  |  |  |  |  |  |  |  |  |  |  |  |  |  |  |  |  |  |  |  |  |  |  |  |  |  |  |  |  |  |  |  |  |  |  |  |  |  |  |  |  |  |  |  |  |  |  |  |  |  |  |  |  |  |  |  |  |  |  |  |  |  |  |  |  |  |  |  |  |  |  |  |  |  |  |  |  |  |  |  |  |  |  |  |  |  |  |  |  |  |  |  |  |  |  |  |  |  |  |  |  |  |  |  |  |  |  |  |  |  |  |  |  |  |  |  |  |  |  |  |  |  |  |  |  |  |  |  |  |  |  |  |  |  |  |  |  |  |  |  |  |  |  |  |  |  |  |  |  |  |  |  |  |  |  |  |  |  |  |  |  |  |  |  |  |  |  |  |  |  |  |  |  |  |  |  |  |  |  |  |  |  |  |  |  |  |  |  |  |  |  |  |  |  |  |  |  |  |  |  |  |  |  |  |  |  |  |  |  |  |  |  |  |  |  |  |  |  |  |  |  |  |  |  |  |  |  |  |  |  |  |  |  |  |  |  |  |  |  |  |  |  |  |  |  |  |  |  |  |  |  |  |  |  |  |  |  |  |  |  |  |  |  |  |  |  |  |  |  |  |  |  |  |  |  |  |  |  |  |  |  |  |  |  |  |  |  |  |  |  |  |  |  |  |  |  |  |  |  |  |  |  |  |  |  |  |  |  |  |  |  |  |  |  |  |  |  |  |  |  |  |  |  |  |  |  |  |  |  |  |  |  |  |  |  |  |  |  |  |  |  |  |  |  |  |  |  |  |  |  |  |  |  |  |  |  |  |  |  |  |  |  |  |  |  |  |  |  |  |  |  |  |  |  |  |  |  |  |  |  |  |  |  |  |  |  |  |  |  |  |  |  |  |  |  |  |  |  |  |  |  |  |  |  |  |  |  |  |  |  |  |  |  |  |  |  |  |  |  |  |  |  |  |  |  |  |  |  |  |  |  |  |  |  |  |  |  |  |  |  |  |  |  |  |  |  |  |  |  |  |  |  |  |  |  |  |  |  |  |  |  |  |  |  |  |  |  |  |  |  |  |  |  |  |  |  |  |  |  |  |  |  |  |  |  |  |  |  |  |  |  |  |  |  |  |  |  |  |  |  |  |  |  |  |  |  |  |  |  |  |  |  |  |  |  |  |  |  |  |  |  |  |  |  |  |  |  |  |  |  |  |  |  |  |  |  |  |  |  |  |  |  |  |  |  |  |  |  |  |  |  |  |  |  |  |  |  |  |  |  |  |  |  |  |  |  |  |  |  |  |  |  |  |  |  |  |  |  |  |  |  |  |  |  |  |  |  |  |  |  |  |  |  |  |  |  |  |  |  |  |  |  |  |  |  |  |  |  |  |  |  |  |  |  |  |  |  |  |  |  |  |  |  |  |  |  |  |  |  |  |  |  |  |  |  |  |  |  |  |  |  |  |  |  |  |  |  |  |  |  |  |  |  |  |  |  |  |  |  |  |  |  |  |  |  |  |  |  |  |  |  |  |  |  |  |  |  |  |  |  |  |  |  |  |  |  |  |  |  |  |  |  |  |  |  |  |  |  |  |  |  |  |  |  |  |  |  |  |  |  |  |  |  |  |  |  |  |  |  |  |  |  |  |  |  |  |  |  |  |  |  |  |  |  |  |  |  |  |  |  |  |  |  |  |  |  |  |  |  |  |  |  |  |  |  |  |  |  |  |  |  |  |  |  |  |  |  |  |  |  |  |  |  |  |  |  |  |  |  |  |  |  |  |  |  |  |  |  |  |  |  |  |  |  |  |  |  |  |  |  |  |  |  |  |  |  |  |  |  |  |  |  |  |  |  |  |  |  |  |  |  |  |  |  |  |  |  |  |  |  |  |  |  |  |  |  |  |  |  |  |  |  |  |  |  |  |  |  |  |  |  |  |  |  |  |  |  |  |  |  |  |  |  |  |  |  |  |  |  |  |  |  |  |  |  |  |  |  |  |  |  |  |  |  |  |  |  |  |  |  |  |  |  |  |  |  |  |  |  |  |  |  |  |  |  |  |  |  |  |  |  |  |  |  |  |  |  |  |  |  |  |  |  |  |  |  |  |  |  |  |  |  |  |  |  |  |  |  |  |  |  |  |  |  |  |  |  |  |  |  |  |  |  |  |  |  |  |  |  |  |  |  |  |  |  |  |  |  |  |  |  |  |  |  |  |  |  |  |  |  |  |  |  |  |  |  |  |  |  |  |  |  |  |  |  |  |  |  |  |  |  |  |  |  |  |  |  |  |  |  |  |  |  |  |  |  |  |  |  |  |  |  |  |  |  |  |  |  |  |  |  |  |  |  |  |  |  |  |  |  |  |  |  |  |  |  |  |  |  |  |  |  |  |  |  |  |  |  |  |  |  |  |  |

















Complete network meta-analysis results and GRADE

| Venous thromboembolism          |                                 |                   |                |                |                               |                |                |              |                   |                |                |                               |                |                |              |                   |                |                |                               |                |                |              |                         |
|---------------------------------|---------------------------------|-------------------|----------------|----------------|-------------------------------|----------------|----------------|--------------|-------------------|----------------|----------------|-------------------------------|----------------|----------------|--------------|-------------------|----------------|----------------|-------------------------------|----------------|----------------|--------------|-------------------------|
| Comparison                      |                                 | Direct estimate   |                |                |                               |                |                |              | Indirect estimate |                |                |                               |                |                |              | Network estimate  |                |                |                               |                |                |              | Reasons for downgrading |
| Treatment 1                     | Treatment 2                     | Relative estimate |                |                | Absolute estimate (per 1,000) |                |                | Final rating | Relative estimate |                |                | Absolute estimate (per 1,000) |                |                | Final rating | Relative estimate |                |                | Absolute estimate (per 1,000) |                |                | Final rating |                         |
|                                 |                                 | Point estimate    | CI lower limit | CI upper limit | Point estimate                | CI lower limit | CI upper limit |              | Point estimate    | CI lower limit | CI upper limit | Point estimate                | CI lower limit | CI upper limit |              | Point estimate    | CI lower limit | CI upper limit | Point estimate                | CI lower limit | CI upper limit |              |                         |
| aspirin                         | standard care/placebo           | 2.85              | 0.09           | 87.32          | 54.59                         | -29.15         | 712.00         | VERY LOW     | NA                | NA             | NA             | NA                            | NA             | NA             | NA           | 1.19E+06          | 1.30           | 4.42E+19       | 837.53                        | 12.04          | 967.75         | VERY LOW     | Imprecisionx3           |
| full-dose anticoagulant         | standard care/placebo           | 0.52              | 0.33           | 0.84           | -15.11                        | -21.41         | -5.10          | LOW          | 0.35              | 0.06           | 1.80           | -20.69                        | -30.11         | 24.35          | VERY LOW     | 0.50              | 0.32           | 0.78           | -15.53                        | -21.72         | -7.23          | LOW          | RoB, Imprecision        |
| intermediate-dose anticoagulant | standard care/placebo           | 1.17              | 0.23           | 6.04           | 5.17                          | -24.79         | 135.23         | VERY LOW     | 1.72              | 0.63           | 5.32           | 21.99                         | -11.66         | 118.39         | VERY LOW     | 1.49              | 0.69           | 3.41           | 18.54                         | -9.83          | 67.39          | LOW          | RoB, Imprecision        |
| sulodexide                      | standard care/placebo           | 1.01              | 0.10           | 10.17          | 0.41                          | -28.90         | 220.88         | VERY LOW     | NA                | NA             | NA             | NA                            | NA             | NA             | NA           | 1.04              | 0.10           | 11.35          | 25.33                         | -29.21         | 227.36         | VERY LOW     | Imprecisionx3           |
| full-dose anticoagulant         | aspirin                         | 0.17              | 0.01           | 5.10           | NA                            | NA             | NA             | VERY LOW     | NA                | NA             | NA             | NA                            | NA             | NA             | NA           | 0.00              | 0.00           | 0.38           | -853.06                       | -988.78        | -27.98         | VERY LOW     | Imprecisionx3           |
| aspirin                         | intermediate-dose anticoagulant | NA                | NA             | NA             | NA                            | NA             | NA             | NA           | 7.89E+05          | 0.89           | 2.99E+19       | 818.98                        | -4.69          | 975.39         | VERY LOW     | 7.89E+05          | 0.89           | 2.99E+19       | 818.98                        | -4.69          | 975.39         | VERY LOW     | Imprecisionx3           |
| aspirin                         | sulodexide                      | NA                | NA             | NA             | NA                            | NA             | NA             | NA           | 1.31E+06          | 0.99           | 3.62E+19       | 812.19                        | -3.29          | 995.87         | VERY LOW     | 1.31E+06          | 0.99           | 3.62E+19       | 812.19                        | -3.29          | 995.87         | VERY LOW     | Imprecisionx3           |
| intermediate-dose anticoagulant | full-dose anticoagulant         | 3.13              | 1.07           | 9.49           | NA                            | NA             | NA             | LOW          | 2.27              | 0.54           | 10.09          | NA                            | NA             | NA             | VERY LOW     | 3.00              | 1.45           | 6.50           | 34.08                         | 7.27           | 80.29          | MODERATE     | Imprecision             |
| full-dose anticoagulant         | sulodexide                      | NA                | NA             | NA             | NA                            | NA             | NA             | NA           | 0.48              | 0.04           | 5.07           | -40.87                        | -242.40        | 15.15          | VERY LOW     | 0.48              | 0.04           | 5.07           | -40.87                        | -242.40        | 15.15          | VERY LOW     | RoB, Imprecisionx3      |
| intermediate-dose anticoagulant | sulodexide                      | NA                | NA             | NA             | NA                            | NA             | NA             | NA           | 1.43              | 0.12           | 16.82          | -6.79                         | -209.73        | 74.63          | VERY LOW     | 1.43              | 0.12           | 16.82          | -6.79                         | -209.73        | 74.63          | VERY LOW     | RoB, Imprecisionx3      |

Comparative efficacy and safety of baricitinib, ruxolitinib, and tofacitinib:  
A Bayesian network meta-analysis

## Methods

In our living network meta-analysis of drug treatments for COVID-19,<sup>1</sup> we combined all JAK inhibitors into a single node. To compare the safety and efficacy of specific JAK inhibitors head-to-head, we performed a second Bayesian NMA. We included randomised control trials (RCTs) identified up to October 18, 2020 that reported adverse events leading to discontinuation, duration of hospitalization, duration of mechanical ventilation, ICU length of stay mechanical ventilation, mortality, time to symptom resolution, time to viral clearance, and ventilator-free days in which patients were randomised to two or more of the following interventions: any JAK inhibitor, corticosteroids + IL6 receptor antagonists, standard care/placebo. Due to low event rate, we meta-analysed adverse events using the risk difference and corresponding 95% credible interval, while all other binary outcomes were meta-analysed using the odds ratio and corresponding 95% credible interval. Because we expected variation between studies for the outcomes time to symptom resolution and time to viral clearance, we first performed the analyses using the relative effect measure ratio of means and corresponding 95% credible interval before calculating the mean difference in days. All other continuous outcomes were summarised using the mean difference and corresponding 95% credible interval. Readers can find more details about the literature search, data extraction, meta-analysis, and GRADE assessment elsewhere.<sup>1</sup>

## Results

Baricitinib (3 RCTs), ruxolitinib (2 RCTs), and tofacitinib (1 RCT) were the JAK inhibitors investigated in eligible trials. [Table 1](#) provides an overview of all 36 RCTs included in our NMA. We encourage readers to visit our website ([www.covid19lnma.com](http://www.covid19lnma.com)) to view summary of findings tables for specific comparisons of interest. Risk of bias (RoB) tables, forest plots for pairwise meta-analyses, network plots, and full results of the NMA (direct, indirect, and network estimates) can be found below for all outcomes of interest.

| Outcome                     | Risk of bias table       | Forest plots                  | Network plot              | Full results of NMA      |
|-----------------------------|--------------------------|-------------------------------|---------------------------|--------------------------|
| Adverse events              | <a href="#">Table 2</a>  | <a href="#">Figures 1-2</a>   | <a href="#">Figure 25</a> | <a href="#">Table 11</a> |
| Duration of hospitalization | <a href="#">Table 3</a>  | <a href="#">Figures 3-6</a>   | <a href="#">Figure 26</a> |                          |
| Duration of ventilation     | <a href="#">Table 4</a>  | <a href="#">Figures 7-8</a>   | <a href="#">Figure 27</a> |                          |
| ICU length of stay          | <a href="#">Table 5</a>  | <a href="#">Figures 9-10</a>  | <a href="#">Figure 28</a> |                          |
| Mechanical ventilation      | <a href="#">Table 6</a>  | <a href="#">Figures 11-14</a> | <a href="#">Figure 29</a> |                          |
| Mortality                   | <a href="#">Table 7</a>  | <a href="#">Figures 15-18</a> | <a href="#">Figure 30</a> |                          |
| Time to symptom resolution  | <a href="#">Table 8</a>  | <a href="#">Figures 19-21</a> | <a href="#">Figure 31</a> |                          |
| Time to viral clearance     | <a href="#">Table 9</a>  | <a href="#">Figure 22</a>     | -----                     | -----                    |
| Ventilator-free days        | <a href="#">Table 10</a> | <a href="#">Figures 23-24</a> | <a href="#">Figure 32</a> |                          |

**Table 1.** Characteristics of included studies.

| Study                                                    | Publication status<br>Registration     | Number of participants | Country       | Mean age | % Male | Comorbidities                                                                    | Type of care                         | Severity                                   | % Mechanical ventilation<br>(at baseline) | Detailed ventilation (%)                                | Treatments (dose and duration)                                                                                                | Outcomes                                                                                                                                                         |
|----------------------------------------------------------|----------------------------------------|------------------------|---------------|----------|--------|----------------------------------------------------------------------------------|--------------------------------------|--------------------------------------------|-------------------------------------------|---------------------------------------------------------|-------------------------------------------------------------------------------------------------------------------------------|------------------------------------------------------------------------------------------------------------------------------------------------------------------|
| ARCHITECTS_NCT04412772, 2021<br>ARCHITECTS               | Data from meta-analysis<br>NCT04412772 | 21                     | United States | 61.5     | 57.1   | NR                                                                               | Inpatient                            | Severe (100%)                              | NR                                        | NR                                                      | tocilizumab (8 mg/kg (up to 800 mg) single dose)<br>placebo                                                                   | Mortality                                                                                                                                                        |
| CORIMUNO-SARI-1_NCT04324073, 2021<br>CORIMUNO-SARI-1     | Data from meta-analysis<br>NCT04324073 | 144                    | France        | 62.3     | 75     | NR                                                                               | Inpatient                            | Severe (100%)                              | NR                                        | NR                                                      | sarilumab (400 mg for one to two doses)<br>standard care                                                                      | Mortality                                                                                                                                                        |
| CORIMUNO-SARI-ICU_NCT04324073, 2021<br>CORIMUNO-SARI-ICU | Data from meta-analysis<br>NCT04324073 | 81                     | France        | 61.6     | 76.5   | NR                                                                               | Inpatient<br>Intensive care (100.0%) | Severe (100%)                              | NR                                        | NR                                                      | sarilumab (400 mg one to two doses)<br>standard care                                                                          | Mortality<br>Duration of ventilation                                                                                                                             |
| CORIMUNO-TOCI-ICU_NCT04331808, 2021                      | Published<br>NCT04331808               | 92                     | France        | 64.2     | 71.7   | NR                                                                               | Inpatient<br>Intensive care (100.0%) | Severe (100%)<br>Severe: Critical (100.0%) | 100                                       | lv, niv, or high flow (100.0%)                          | tocilizumab (8 mg/kg on day 1, and 400 mg on day 3 if oxygen requirement was not decreased by more than 50%)<br>standard care | Mortality<br>Duration of ventilation                                                                                                                             |
| COV-AID_NCT04330638, 2021<br>COV-AID                     | Data from meta-analysis<br>NCT04330638 | 230                    | Belgium       | 63.6     | 77.4   | NR                                                                               | Inpatient                            | Severe (100%)                              | NR                                        | NR                                                      | tocilizumab (8 mg/kg (up to 800 mg) single dose)<br>siltuximab (11 mg/kg single dose)<br>standard care                        | Mortality<br>Duration of ventilation                                                                                                                             |
| COVIDOSE2-SSA_NCT04479358, 2021<br>COVIDOSE2-SSA         | Data from meta-analysis<br>NCT04479358 | 28                     | United States | 65       | 67.9   | NR                                                                               | Inpatient                            | Severe (100%)                              | 0                                         | Mechanical ventilation (0.0%)                           | tocilizumab (40 mg single dose)<br>tocilizumab (120 mg single dose)<br>standard care                                          | Mortality                                                                                                                                                        |
| COVIDSTORM_NCT04577534, 2021<br>COVIDSTORM               | Data from meta-analysis<br>NCT04577534 | 39                     | Finland       | 65.7     | 53.9   | NR                                                                               | Inpatient                            | Severe (100%)                              | NR                                        | NR                                                      | tocilizumab (8 mg/kg (up to 800 mg) single dose)<br>standard care                                                             | Mortality                                                                                                                                                        |
| COVITOX_NCT04435717, 2021<br>COVITOX-01                  | Data from meta-analysis<br>NCT04435717 | 26                     | Spain         | 57.5     | 65.4   | NR                                                                               | Inpatient                            | Severe (100%)                              | NR                                        | NR                                                      | tocilizumab (8 mg/kg (up to 800 mg) single dose)<br>tocilizumab (8 mg/kg up to 800 mg two doses)<br>standard care             | Mortality                                                                                                                                                        |
| Cao_2, 2020                                              | Published<br>ChiCTR-OPN-2000029580     | 43                     | China         | 63       | 58.5   | Coronary artery heart disease (7.3%)<br>Diabetes (19.5%)<br>Hypertension (39.0%) | Inpatient                            | Severe (100%)                              | 12.2                                      | Supplemental oxygen (87.8%)<br>High flow or niv (12.2%) | ruxolitinib (5 mg twice daily)<br>placebo                                                                                     | Mortality<br>Mechanical ventilation<br>Duration of hospitalization<br>Duration of ventilation<br>Time to symptom/clinical improvement<br>Time to viral clearance |

| Study                                          | Publication status<br>Registration     | Number of participants | Country                                                                     | Mean age | % Male | Comorbidities                                                                                                        | Type of care                         | Severity                                   | % Mechanical ventilation (at baseline) | Detailed ventilation (%)                               | Treatments (dose and duration)                                                                                                | Outcomes                                                                                                                                                                                                |
|------------------------------------------------|----------------------------------------|------------------------|-----------------------------------------------------------------------------|----------|--------|----------------------------------------------------------------------------------------------------------------------|--------------------------------------|--------------------------------------------|----------------------------------------|--------------------------------------------------------|-------------------------------------------------------------------------------------------------------------------------------|---------------------------------------------------------------------------------------------------------------------------------------------------------------------------------------------------------|
| Ely, 2021<br>COV-BARRIER addendum              | Pre-print<br>NCT04421027               | 101                    | Argentina, Brazil, Mexico, United States                                    | 58.6     | 54.5   | Chronic respiratory disease (3.0%)<br>Diabetes (35.6%)<br>Hypertension (54.5%)                                       | Inpatient                            | Severe (100%)<br>Severe: Critical (100.0%) | 100                                    | Iv or ecmo (100.0%)                                    | baricitinib (4 mg daily for 14 days or until discharge)<br>placebo                                                            | Mortality<br>Adverse effects leading to discontinuation<br>Duration of hospitalization<br>ICU length of stay<br>Ventilator-free days<br>Duration of ventilation<br>Time to symptom/clinical improvement |
| Gordon_1, 2021<br>REMAP-CAP                    | Published<br>NCT02735707               | 826                    | United Kingdom, Netherlands, Australia, New Zealand, Ireland, Saudia Arabia | 61.4     | 72.6   | Respiratory condition (23.9%)<br>Severe cardiovascular disease (10.2%)<br>Diabetes (35.4%)                           | Inpatient<br>Intensive care (100.0%) | Severe (100%)<br>Severe: Critical (100.0%) | 99.6                                   | High-flow (28.8%)<br>Niv (41.5%)<br>Iv (29.4%)         | tocilizumab (8 mg/kg, for a maximum of 800 mg, in 24 hours)<br>sarilumab (400 mg single dose)<br>standard care                | Mortality<br>Mechanical ventilation<br>Duration of hospitalization<br>ICU length of stay<br>Ventilator-free days<br>Duration of ventilation                                                             |
| Guimarães, 2021<br>STOP-COVID                  | Published<br>NCT04469114               | 289                    | Brazil                                                                      | 56       | 65     | Diabetes (23.5%)<br>Hypertension (50.2%)                                                                             | Inpatient                            | NR                                         | 0                                      | Supplemental oxygen (75.4%)<br>Niv, iv, or ecmo (0.0%) | tofacitinib (10 mg twice daily for up to 14 days or until hospital discharge)<br>placebo                                      | Mortality<br>Mechanical ventilation<br>Adverse effects leading to discontinuation<br>Duration of hospitalization<br>ICU length of stay<br>Duration of ventilation                                       |
| HMO-020-0224_NCT04377750, 2021<br>HMO-020-0224 | Data from meta-analysis<br>NCT04377750 | 54                     | Israel                                                                      | 63.1     | 68.5   | NR                                                                                                                   | Inpatient                            | Severe (100%)                              | NR                                     | NR                                                     | tocilizumab (8 mg/kg (up to 800 mg) single dose)<br>placebo                                                                   | Duration of ventilation                                                                                                                                                                                 |
| Hermine, 2020<br>CORIMUNO-TOCI 1               | Published<br>NCT04331808               | 131                    | France                                                                      | 64       | 67.7   | Asthma (6.2%)<br>Chronic pulmonary disease, not asthma (4.7%)<br>Chronic cardiac disease (31.2%)<br>Diabetes (33.6%) | Inpatient                            | Severe (100%)                              | 0                                      | Supplemental oxygen (100.0%)<br>Niv or iv (0.0%)       | tocilizumab (8 mg/kg on day 1, and 400 mg on day 3 if oxygen requirement was not decreased by more than 50%)<br>standard care | Mortality<br>Mechanical ventilation                                                                                                                                                                     |

| Study                                  | Publication status<br>Registration     | Number of participants | Country                                                                              | Mean age | % Male | Comorbidities                                                                                                                                                                                                                                           | Type of care | Severity              | % Mechanical ventilation (at baseline) | Detailed ventilation (%)                                                      | Treatments (dose and duration)                                                                                                                                                                                                              | Outcomes                                                                                                                              |
|----------------------------------------|----------------------------------------|------------------------|--------------------------------------------------------------------------------------|----------|--------|---------------------------------------------------------------------------------------------------------------------------------------------------------------------------------------------------------------------------------------------------------|--------------|-----------------------|----------------------------------------|-------------------------------------------------------------------------------|---------------------------------------------------------------------------------------------------------------------------------------------------------------------------------------------------------------------------------------------|---------------------------------------------------------------------------------------------------------------------------------------|
| Hermine_toci, 2020<br>CORIMUNO-TOCIDEX | Pre-print<br>NCT04476979               | 453                    | French Guiana                                                                        | 63.4     | 67.8   | Asthma (8.4%)<br>Chronic pulmonary disease - not asthma (7.2%)<br>Chronic cardiac disease (15.8%)<br>Diabetes (23.8%)<br>Hypertension (37.1%)                                                                                                           | Inpatient    | Severe (100%)         | 0                                      | Supplementary oxygen (100.0%)<br>High-flow, niv, iv (0.0%)                    | corticosteroids, tocilizumab (10 mg/d 5 days and tapering doses up to 10 days (5mg/d for 5 days and 2.5mg/d for 5 days; 8mg/kg intravenously at day 1 with additional doses 400 mg IV recommended if no clinical response)<br>standard care | Mortality<br>Mechanical ventilation                                                                                                   |
| Horby_5, 2021<br>RECOVERY              | Published<br>NCT04381936               | 4116                   | United Kingdom                                                                       | 63.6     | 67.4   | Chronic lung disease (23.2%)<br>Tuberculosis (0.2%)<br>Heart disease (22.6%)<br>Diabetes (28.4%)                                                                                                                                                        | Inpatient    | Severe (100%)         | 54.6                                   | Supplemental oxygen (45.4%)<br>High-flow or niv (41.0%)<br>Iv (13.7%)         | tocilizumab (8 mg/kg, for up to a maximum of 800 mg, once)<br>standard care                                                                                                                                                                 | Mortality<br>Duration of ventilation<br>Mechanical ventilation<br>Duration of hospitalization                                         |
| ImmCoVA_NCT04412291, 2021<br>ImmCoVA   | Data from meta-analysis<br>NCT04412291 | 49                     | Sweden                                                                               | NR       | NR     | NR                                                                                                                                                                                                                                                      | Inpatient    | Severe (100%)         | 0                                      | Iv (0.0%)                                                                     | tocilizumab (8 mg/kg single dose, up to a maximum of 800 mg; another dose of 8 mg/kg may be administered after earliest 2 days)<br>standard care                                                                                            | Mortality                                                                                                                             |
| Kalil, 2020<br>ACTT-2                  | Published<br>NCT04401579               | 1033                   | United States, Singapore, South Korea, Mexico, Japan, Spain, United Kingdom, Denmark | 55.4     | 63.1   | Asthma (9.4%)<br>Chronic oxygen requirement (1.6%)<br>Chronic respiratory disease (6.7%)<br>Cardiac valvular disease (2.1%)<br>Congestive heart failure (6.0%)<br>Coronary artery disease (9.8%)<br>T2DM (35.8%)<br>T1DM (1.0%)<br>Hypertension (50.5%) | Inpatient    | Mild/Moderate (64.5%) | 31.7                                   | Supplemental oxygen (54.6%)<br>High-flow or niv (20.9%)<br>Iv or ecmo (10.8%) | baricitinib (4 mg daily for 14 days)<br>placebo                                                                                                                                                                                             | Mortality<br>Mechanical ventilation<br>Duration of hospitalization<br>Duration of ventilation<br>Time to symptom/clinical improvement |

| Study                                  | Publication status<br>Registration                                         | Number of participants | Country                                                                                                          | Mean age | % Male | Comorbidities                                                                                                 | Type of care                        | Severity                                  | % Mechanical ventilation (at baseline) | Detailed ventilation (%)                                                                                                                      | Treatments (dose and duration)                                                                                                 | Outcomes                                                                                                                                                                                               |
|----------------------------------------|----------------------------------------------------------------------------|------------------------|------------------------------------------------------------------------------------------------------------------|----------|--------|---------------------------------------------------------------------------------------------------------------|-------------------------------------|-------------------------------------------|----------------------------------------|-----------------------------------------------------------------------------------------------------------------------------------------------|--------------------------------------------------------------------------------------------------------------------------------|--------------------------------------------------------------------------------------------------------------------------------------------------------------------------------------------------------|
| Lescure, 2021                          | Published<br>NCT04327388; Eudra CT (2020-001162-12), WHO (U1111-1249-6021) | 420                    | Argentina, Brazil, Canada, Chile, France, Germany, Israel, Italy, Japan, Russia, Spain                           | 59       | 62.7   | Copd (4.3%)<br>Asthma (4.1%)<br>Coronary artery disease (5.3%)<br>Diabetes (26.4%)<br>Hypertension (42.5%)    | Inpatient<br>Intensive care (35.6%) | Severe (100%)<br>Severe: Critical (38.9%) | 19.5                                   | Nasal cannula (42.1%)<br>Face mask (26.7%)<br>Nonrebreather face mask (10.5%)<br>High-flow (6.2%)<br>Niv (1.7%)<br>Iv (11.5%)<br>Other (1.2%) | sarilumab (400 mg, single dose)<br>sarilumab (200 mg, single dose)<br>placebo                                                  | Mortality<br>Mechanical ventilation<br>Duration of hospitalization<br>Time to symptom/clinical improvement                                                                                             |
| Marconi, 2021<br>COV-BARRIER           | Published<br>NCT04421027                                                   | 1525                   | Argentina, Brazil, Germany, India, Italy, Japan, Korea, Mexico, Russia, Spain, United Kingdom, United States     | 57.6     | 63.1   | Chronic respiratory disease (4.6%)<br>T1DM (30.0%)<br>Hypertension (47.9%)                                    | Inpatient                           | Severe (100%)                             | 24.4                                   | Supplemental oxygen (63.4%)<br>High-flow or niv oxygen (24.4%)<br>Iv (0.0%)                                                                   | baricitinib (4 mg daily for 14 days or until discharge (patients with eGFR≥30 to <60 mL/min/1.73 m² received 2 mg))<br>placebo | Mortality<br>Mechanical ventilation<br>Adverse effects leading to discontinuation<br>Duration of hospitalization<br>ICU length of stay<br>Ventilator-free days<br>Time to symptom/clinical improvement |
| REMDACTA_NCT04409262, 2021<br>REMDACTA | Data from meta-analysis<br>NCT04409262                                     | 640                    | Spain, United States, Brazil, Russia                                                                             | 60.3     | 63.3   | NR                                                                                                            | Inpatient                           | Severe (100%)                             | NR                                     | NR                                                                                                                                            | tocilizumab (8 mg/kg (up to 800 mg) for one to two doses)<br>placebo                                                           | Mortality                                                                                                                                                                                              |
| RUXCOVID, 2021<br>RUXCOVID             | Trial registration<br>NCT04362137                                          | 432                    | United States, Argentina, Brazil, Colombia, France, Germany, Mexico, Peru, Russia, Spain, Turkey, United Kingdom | 56.6     | 54.4   | NR                                                                                                            | Inpatient                           | Severe (100%)                             | 0                                      | Iv (0.0%)                                                                                                                                     | ruxolitinib (5 mg twice daily for 14 days with possible extension of treatment to 28 days)<br>placebo                          | Mortality<br>Mechanical ventilation<br>Adverse effects leading to discontinuation<br>Duration of hospitalization<br>Time to symptom/clinical improvement                                               |
| Rosas, 2021<br>COVACTA                 | Published<br>NCT04320615                                                   | 452                    | Canada, Denmark, France, Germany, Italy, Netherlands, Spain, United Kingdom, United States                       | 60.8     | 69.9   | Chronic lung disease (16.2%)<br>Cardiovascular impairment (28.1%)<br>Diabetes (38.1%)<br>Hypertension (62.1%) | Inpatient<br>Intensive care (56.4%) | Severe (100%)                             | 37.7                                   | Unspecified ventilation (37.7%)                                                                                                               | tocilizumab (8 mg/kg, maximum 800 mg, up to two times in 24 hours)<br>placebo                                                  | Mortality<br>Mechanical ventilation<br>Adverse effects leading to discontinuation<br>Duration of hospitalization<br>ICU length of stay<br>Ventilator-free days                                         |

| Study                                          | Publication status<br>Registration               | Number of participants | Country                                                  | Mean age | % Male | Comorbidities                                                                                                                           | Type of care                        | Severity                                  | % Mechanical ventilation (at baseline) | Detailed ventilation (%)                                                         | Treatments (dose and duration)                                                                                                                                              | Outcomes                                                                                                                                                 |
|------------------------------------------------|--------------------------------------------------|------------------------|----------------------------------------------------------|----------|--------|-----------------------------------------------------------------------------------------------------------------------------------------|-------------------------------------|-------------------------------------------|----------------------------------------|----------------------------------------------------------------------------------|-----------------------------------------------------------------------------------------------------------------------------------------------------------------------------|----------------------------------------------------------------------------------------------------------------------------------------------------------|
|                                                |                                                  |                        |                                                          |          |        |                                                                                                                                         |                                     |                                           |                                        |                                                                                  |                                                                                                                                                                             | Duration of ventilation<br>Time to symptom/clinical improvement                                                                                          |
| Rutgers, 2021<br>PreToVid                      | Pre-print<br>NL8504                              | 354                    | Netherlands                                              | 66.5     | 67     | NR                                                                                                                                      | Inpatient                           | Severe (100%)                             | NR                                     | Supplemental oxygen (96.6%)                                                      | tocilizumab (single dose of 8 mg/kg of body weight intravenously or 800mg max, second dose permitted after 8 hours if hypoxia not resolved) standard care                   | Mechanical ventilation<br>Duration of hospitalization<br>ICU length of stay<br>Duration of ventilation                                                   |
| SARCOVID_NCT04357808, 2021<br>SARCOVID         | Data from meta-analysis<br>NCT04357808           | 30                     | Spain                                                    | 61.7     | 66.7   | NR                                                                                                                                      | Inpatient                           | Severe (100%)                             | 0                                      | Mechanical ventilation (0.0%)                                                    | sarilumab (400 mg single dose) standard care                                                                                                                                | Mortality                                                                                                                                                |
| SARICOR_EudraCT2020-001531-27, 2021<br>SARICOR | Data from meta-analysis<br>EudraCT2020-001531-27 | 80                     | Spain                                                    | 59.4     | 71.2   | NR                                                                                                                                      | Inpatient                           | Severe (100%)                             | 0                                      | Mechanical ventilation (0.0%)                                                    | sarilumab (400 mg single dose)<br>sarilumab (200 mg single dose) standard care                                                                                              | Mortality                                                                                                                                                |
| SARTRE_EudraCT2020-002037-15, 2021<br>SARTRE   | Data from meta-analysis<br>EudraCT2020-002037-15 | 140                    | Spain                                                    | 58.4     | 72.9   | NR                                                                                                                                      | Inpatient                           | Severe (100%)                             | 0                                      | Mechanical ventilation (0.0%)                                                    | sarilumab (200 mg to 400 mg single dose) standard care                                                                                                                      | Mortality                                                                                                                                                |
| Salama, 2020<br>EMPACTA                        | Published<br>NCT04372186                         | 388                    | United States, Peru, Brazil, Kenya, South Africa, Mexico | 55.9     | 59.1   | Copd (4.5%)<br>Asthma (11.4%)<br>Myocardial infarction (1.9%)<br>Atrial fibrillation (3.2%)<br>Diabetes (40.6%)<br>Hypertension (48.3%) | Inpatient<br>Intensive care (15.4%) | Severe (100%)                             | 0                                      | Ventilation (0.0%)                                                               | tocilizumab (8 mg/kg, for up to a maximum of 800 mg, in 24 hours) placebo                                                                                                   | Mortality<br>Mechanical ventilation<br>Adverse effects leading to discontinuation<br>Duration of hospitalization<br>Time to symptom/clinical improvement |
| Sivapalasingam_P2, 2021<br>Sarilumab-COVID-19  | Pre-print<br>NCT04315298                         | 457                    | United States                                            | 58.7     | 72.4   | Tuberculosis (0.0%)<br>Diabetes (21.4%)<br>Hypertension (46.4%)                                                                         | Inpatient                           | Severe (100%)<br>Severe: Critical (49.5%) | 49.5                                   | Low-flow supplemental oxygen (27.6%)<br>High-flow oxygen, niv, and/or iv (49.5%) | sarilumab (200 mg, given intravenously over 1 hour; patients could be re-dosed for clinical worsening at 24 hours and weekly for up to 4 doses)<br>sarilumab (400 mg, given | Adverse effects leading to discontinuation                                                                                                               |

| Study                                                     | Publication status<br>Registration | Number of participants | Country       | Mean age | % Male | Comorbidities                                                                                                                                   | Type of care | Severity                                   | % Mechanical ventilation (at baseline) | Detailed ventilation (%)                                | Treatments (dose and duration)                                                                                                                                                                                                                                                                                | Outcomes                                                                                                                                             |
|-----------------------------------------------------------|------------------------------------|------------------------|---------------|----------|--------|-------------------------------------------------------------------------------------------------------------------------------------------------|--------------|--------------------------------------------|----------------------------------------|---------------------------------------------------------|---------------------------------------------------------------------------------------------------------------------------------------------------------------------------------------------------------------------------------------------------------------------------------------------------------------|------------------------------------------------------------------------------------------------------------------------------------------------------|
|                                                           |                                    |                        |               |          |        |                                                                                                                                                 |              |                                            |                                        |                                                         | intravenously over 1 hour; patients could be re-dosed for clinical worsening at 24 hours and weekly for up to 4 doses) placebo                                                                                                                                                                                |                                                                                                                                                      |
| Sivapalasingam_P3_C1, 2021<br>Sarilumab-COVID-19          | Pre-print<br>NCT04315298           | 1365                   | United States | 61.7     | 64.5   | Tuberculosis (0.0%)<br>Diabetes (19.0%)<br>Hypertension (52.7%)                                                                                 | Inpatient    | Severe (100%)<br>Severe: Critical (55.0%)  | 21.8                                   | Low-flow supplemental oxygen (27.0%)<br>lv (21.8%)      | sarilumab (200 mg, given intravenously over 1 hour; patients could be re-dosed for clinical worsening at 24 hours and weekly for up to 4 doses)<br>sarilumab (400 mg, given intravenously over 1 hour; patients could be re-dosed for clinical worsening at 24 hours and weekly for up to 4 doses)<br>placebo | Adverse effects leading to discontinuation                                                                                                           |
| Sivapalasingam_P3_C2_Critical, 2021<br>Sarilumab-COVID-19 | Pre-print<br>NCT04315298           | 31                     | United States | 48.7     | 71     | Tuberculosis (0.0%)<br>Diabetes (29.0%)<br>Hypertension (41.9%)                                                                                 | Inpatient    | Severe (100%)<br>Severe: Critical (100.0%) | 100                                    | lv (100.0%)                                             | sarilumab (800 mg, given intravenously over 1 hour; patients could be re-dosed for clinical worsening at 24 hours and weekly for up to 4 doses)<br>placebo                                                                                                                                                    | Mortality<br>Adverse effects leading to discontinuation                                                                                              |
| Sivapalasingam_P3_C3_Critical, 2021<br>Sarilumab-COVID-19 | Pre-print<br>NCT04315298           | 8                      | United States | 60.8     | 62.5   | Tuberculosis (0.0%)<br>Diabetes (37.5%)<br>Hypertension (62.5%)                                                                                 | Inpatient    | Severe (100%)<br>Severe: Critical (100.0%) | 100                                    | Niv or high-flow oxygen (100.0%)<br>lv (0.0%)           | sarilumab (800 mg, given intravenously over 1 hour; patients could be re-dosed for clinical worsening at 24 hours and weekly for up to 4 doses)<br>placebo                                                                                                                                                    | Mortality<br>Adverse effects leading to discontinuation                                                                                              |
| Soin, 2021<br>COVINTOC                                    | Published<br>CTRI/2020/05/025369   | 180                    | India         | 55       | 84.9   | Copd (2.2%)<br>Respiratory, thoracic, and mediastinal disorders (3.9%)<br>Cardiac disorders (15.1%)<br>Diabetes (41.3%)<br>Hypertension (39.1%) | Inpatient    | Mild/Moderate (49.2%)                      | 31.9                                   | Supplemental oxygen (89.9%)<br>Niv (26.8%)<br>lv (5.0%) | tocilizumab (6 mg/kg, up to a maximum dose of 480 mg, single dose; 6 mg/kg (max 480 mg/kg))<br>standard care                                                                                                                                                                                                  | Mortality<br>Mechanical ventilation<br>ICU length of stay<br>Ventilator-free days<br>Duration of ventilation<br>Time to symptom/clinical improvement |

| Study                   | Publication status<br>Registration | Number of participants | Country       | Mean age | % Male | Comorbidities                                                                                                                    | Type of care                       | Severity      | % Mechanical ventilation (at baseline) | Detailed ventilation (%)                                                                          | Treatments (dose and duration)                                                                                                                     | Outcomes                                                                                                                              |
|-------------------------|------------------------------------|------------------------|---------------|----------|--------|----------------------------------------------------------------------------------------------------------------------------------|------------------------------------|---------------|----------------------------------------|---------------------------------------------------------------------------------------------------|----------------------------------------------------------------------------------------------------------------------------------------------------|---------------------------------------------------------------------------------------------------------------------------------------|
| Stone, 2020<br>BACC     | Published<br>NCT04356937           | 243                    | United States | 59.9     | 58     | Copd (9.1%)<br>Asthma (9.1%)<br>Heart failure (9.9%)<br>Myocardial infarction (8.6%)<br>Diabetes (30.9%)<br>Hypertension (48.6%) | Inpatient<br>Intensive care (4.5%) | Severe (100%) | 4.5                                    | Supplemental oxygen (79.8%)<br>High-flow or niv (4.1%)<br>Iv (0.4%)                               | tocilizumab (8mg/kg, for up to a maximum of 800 mg, once)<br>placebo                                                                               | Mortality<br>Mechanical ventilation<br>Duration of hospitalization<br>Duration of ventilation<br>Time to symptom/clinical improvement |
| Talaschian, 2021        | Pre-print<br>IRCT20081027001411N4  | 40                     | Iran          | 61.7     | 52.8   | Respiratory disorder (8.3%)<br>Cardiovascular disease (44.4%)<br>Diabetes (36.1%)<br>Hypertension (50.0%)                        | Inpatient                          | Severe (100%) | 8.3                                    | Nasal cannula (50.0%)<br>Simple mask (30.6%)<br>Reservoir mask (11.1%)<br>Niv (8.3%)<br>Iv (0.0%) | tocilizumab (8 mg/kg (if the patient’s conditions were not stable, 2 doses by 12 hours were administrated, maximum dose: 800 mg))<br>standard care | Mortality<br>Mechanical ventilation<br>Adverse effects leading to discontinuation<br>Time to symptom/clinical improvement             |
| Veiga, 2021<br>TOCIBRAS | Published<br>NCT04403685           | 129                    | Brazil        | 57.5     | 68.2   | Asthma (3.9%)<br>Copd (3.1%)<br>Heart failure (5.4%)<br>Myocardial infarction (5.4%)<br>Diabetes (32.6%)<br>Hypertension (49.6%) | Inpatient                          | Severe (100%) | 48.1                                   | Supplemental oxygen (51.9%)<br>High-flow or niv (31.8%)<br>Iv (16.3%)                             | tocilizumab (8 mg/kg, for a maximum of 800 mg, in 24 hours)<br>standard care                                                                       | Mortality<br>Mechanical ventilation<br>Duration of hospitalization<br>Ventilator-free days<br>Duration of ventilation                 |

**Table 2.** Risk of bias in RCTs reporting adverse events leading to discontinuation.

| Treatment 1           | Treatment 2           | First author                  | N    | Randomization             | Deviations from the intended intervention | Missing outcome data | Measurement of outcome | Selection of the reported results |
|-----------------------|-----------------------|-------------------------------|------|---------------------------|-------------------------------------------|----------------------|------------------------|-----------------------------------|
| IL6i, corticosteroids | standard care/placebo |                               | 2677 |                           |                                           |                      |                        |                                   |
|                       |                       | Rosas                         | 438  | low risk of bias          | probably high risk of bias                | low risk of bias     | low risk of bias       | low risk of bias                  |
|                       |                       | Salama                        | 377  | probably low risk of bias | low risk of bias                          | low risk of bias     | low risk of bias       | low risk of bias                  |
|                       |                       | Talaschian                    | 36   | probably low risk of bias | low risk of bias                          | low risk of bias     | low risk of bias       | probably low risk of bias         |
|                       |                       | Sivapalasingam_P2             | 457  | probably low risk of bias | low risk of bias                          | low risk of bias     | low risk of bias       | low risk of bias                  |
|                       |                       | Sivapalasingam_P3_C1          | 1330 | probably low risk of bias | low risk of bias                          | low risk of bias     | low risk of bias       | low risk of bias                  |
|                       |                       | Sivapalasingam_P3_C2_Critical | 31   | probably low risk of bias | low risk of bias                          | low risk of bias     | low risk of bias       | low risk of bias                  |
|                       |                       | Sivapalasingam_P3_C3_Critical | 8    | probably low risk of bias | low risk of bias                          | low risk of bias     | low risk of bias       | low risk of bias                  |
| JAKi                  | standard care/placebo |                               | 2309 |                           |                                           |                      |                        |                                   |
|                       |                       | Marconi                       | 1502 | low risk of bias          | low risk of bias                          | low risk of bias     | low risk of bias       | low risk of bias                  |
|                       |                       | Guimarães                     | 284  | low risk of bias          | low risk of bias                          | low risk of bias     | low risk of bias       | low risk of bias                  |
|                       |                       | Ely                           | 99   | low risk of bias          | low risk of bias                          | low risk of bias     | low risk of bias       | low risk of bias                  |
|                       |                       | RUXCOVID                      | 424  | low risk of bias          | low risk of bias                          | low risk of bias     | low risk of bias       | low risk of bias                  |

**Table 3.** Risk of bias in RCTs reporting duration of hospitalisation.

| Treatment 1           | Treatment 2           | First author | N    | Randomization             | Deviations from the intended intervention | Missing outcome data | Measurement of outcome | Selection of the reported results | Other            |
|-----------------------|-----------------------|--------------|------|---------------------------|-------------------------------------------|----------------------|------------------------|-----------------------------------|------------------|
| IL6i, corticosteroids | standard care/placebo |              | 2522 |                           |                                           |                      |                        |                                   |                  |
|                       |                       | Rosas        | 438  | low risk of bias          | probably high risk of bias                | low risk of bias     | low risk of bias       | low risk of bias                  | low risk of bias |
|                       |                       | Salama       | 377  | probably low risk of bias | low risk of bias                          | low risk of bias     | low risk of bias       | low risk of bias                  | low risk of bias |

| Treatment 1  | Treatment 2           | First author | N    | Randomization              | Deviations from the intended intervention | Missing outcome data | Measurement of outcome | Selection of the reported results | Other                     |
|--------------|-----------------------|--------------|------|----------------------------|-------------------------------------------|----------------------|------------------------|-----------------------------------|---------------------------|
|              |                       | Gordon_1     | 803  | low risk of bias           | probably high risk of bias                | low risk of bias     | low risk of bias       | low risk of bias                  | low risk of bias          |
|              |                       | Veiga        | 129  | low risk of bias           | probably high risk of bias                | low risk of bias     | low risk of bias       | low risk of bias                  | low risk of bias          |
|              |                       | Lescure      | 372  | low risk of bias           | low risk of bias                          | low risk of bias     | low risk of bias       | low risk of bias                  | low risk of bias          |
|              |                       | Rutgers      | 354  | probably high risk of bias | probably high risk of bias                | low risk of bias     | low risk of bias       | probably low risk of bias         | low risk of bias          |
|              |                       | Hamed        | 49   | probably high risk of bias | probably high risk of bias                | low risk of bias     | low risk of bias       | probably low risk of bias         | low risk of bias          |
| barticitinib | standard care/placebo |              | 2652 |                            |                                           |                      |                        |                                   |                           |
|              |                       | Kalil        | 1033 | low risk of bias           | low risk of bias                          | low risk of bias     | low risk of bias       | low risk of bias                  | low risk of bias          |
|              |                       | Marconi      | 1518 | low risk of bias           | low risk of bias                          | low risk of bias     | low risk of bias       | low risk of bias                  | low risk of bias          |
|              |                       | Ely          | 101  | low risk of bias           | low risk of bias                          | low risk of bias     | low risk of bias       | low risk of bias                  | low risk of bias          |
| ruxolitinib  | standard care/placebo |              | 472  |                            |                                           |                      |                        |                                   |                           |
|              |                       | Cao_2        | 41   | low risk of bias           | probably high risk of bias                | low risk of bias     | low risk of bias       | probably low risk of bias         | probably low risk of bias |
|              |                       | RUXCOVID     | 431  | low risk of bias           | low risk of bias                          | low risk of bias     | low risk of bias       | low risk of bias                  | low risk of bias          |
| tofacitinib  | standard care/placebo |              | 289  |                            |                                           |                      |                        |                                   |                           |
|              |                       | Guimarães    | 289  | low risk of bias           | low risk of bias                          | low risk of bias     | low risk of bias       | low risk of bias                  | low risk of bias          |

**Table 4.** Risk of bias in RCTs reporting duration of ventilation.

| Treatment 1           | Treatment 2           | First author                  | N   | Randomization              | Deviations from the intended intervention | Missing outcome data | Measurement of outcome | Selection of the reported results | Other                      |
|-----------------------|-----------------------|-------------------------------|-----|----------------------------|-------------------------------------------|----------------------|------------------------|-----------------------------------|----------------------------|
| IL6i, corticosteroids | standard care/placebo |                               | 826 |                            |                                           |                      |                        |                                   |                            |
|                       |                       | Rosas                         | 43  | low risk of bias           | probably high risk of bias                | low risk of bias     | low risk of bias       | low risk of bias                  | low risk of bias           |
|                       |                       | Gordon_1                      | 239 | low risk of bias           | probably high risk of bias                | low risk of bias     | low risk of bias       | low risk of bias                  | low risk of bias           |
|                       |                       | Veiga                         | 11  | low risk of bias           | probably high risk of bias                | low risk of bias     | low risk of bias       | low risk of bias                  | low risk of bias           |
|                       |                       | Horby_5                       | 405 | low risk of bias           | probably high risk of bias                | low risk of bias     | low risk of bias       | low risk of bias                  | low risk of bias           |
|                       |                       | Soin                          | 9   | probably high risk of bias | probably high risk of bias                | low risk of bias     | low risk of bias       | low risk of bias                  | low risk of bias           |
|                       |                       | ARCHITECTS_NCT04412772        | 19  | low risk of bias           | low risk of bias                          | low risk of bias     | low risk of bias       | low risk of bias                  | low risk of bias           |
|                       |                       | CORIMUNO-TOCI-ICU_NCT04331808 | 9   | low risk of bias           | probably high risk of bias                | low risk of bias     | low risk of bias       | low risk of bias                  | low risk of bias           |
|                       |                       | COV-AID_NCT04330638           | 11  | low risk of bias           | probably high risk of bias                | low risk of bias     | low risk of bias       | low risk of bias                  | low risk of bias           |
|                       |                       | HMO-020-0224_NCT04377750      | 27  | probably low risk of bias  | low risk of bias                          | low risk of bias     | low risk of bias       | low risk of bias                  | probably high risk of bias |
|                       |                       | Rutgers                       | 45  | probably high risk of bias | probably high risk of bias                | low risk of bias     | low risk of bias       | probably low risk of bias         | low risk of bias           |
|                       |                       | Hamed                         | 8   | probably high risk of bias | probably high risk of bias                | low risk of bias     | low risk of bias       | probably low risk of bias         | low risk of bias           |
| barticitinib          | standard care/placebo |                               | 328 |                            |                                           |                      |                        |                                   |                            |
|                       |                       | Kalil                         | 227 | low risk of bias           | low risk of bias                          | low risk of bias     | low risk of bias       | low risk of bias                  | low risk of bias           |
|                       |                       | Ely                           | 101 | low risk of bias           | low risk of bias                          | low risk of bias     | low risk of bias       | low risk of bias                  | low risk of bias           |

| Treatment 1 | Treatment 2           | First author | N | Randomization    | Deviations from the intended intervention | Missing outcome data | Measurement of outcome | Selection of the reported results | Other                      |
|-------------|-----------------------|--------------|---|------------------|-------------------------------------------|----------------------|------------------------|-----------------------------------|----------------------------|
| ruxolitinib | standard care/placebo |              | 3 |                  |                                           |                      |                        |                                   |                            |
|             |                       | Cao_2        | 3 | low risk of bias | probably high risk of bias                | low risk of bias     | low risk of bias       | probably low risk of bias         | probably high risk of bias |
| tofacitinib | standard care/placebo |              | 0 |                  |                                           |                      |                        |                                   |                            |
|             |                       | Guimarães    | 0 | low risk of bias | low risk of bias                          | low risk of bias     | low risk of bias       | probably low risk of bias         | probably low risk of bias  |

Table 5. Risk of bias in RCTs reporting ICU length of stay.

| Treatment 1           | Treatment 2           | First author | N    | Randomization              | Deviations from the intended intervention | Missing outcome data | Measurement of outcome | Selection of the reported results | Other            |
|-----------------------|-----------------------|--------------|------|----------------------------|-------------------------------------------|----------------------|------------------------|-----------------------------------|------------------|
| IL6i, corticosteroids | standard care/placebo |              | 1309 |                            |                                           |                      |                        |                                   |                  |
|                       |                       | Rosas        | 303  | low risk of bias           | probably high risk of bias                | low risk of bias     | low risk of bias       | low risk of bias                  | low risk of bias |
|                       |                       | Gordon_1     | 803  | low risk of bias           | probably high risk of bias                | low risk of bias     | low risk of bias       | low risk of bias                  | low risk of bias |
|                       |                       | Soin         | 135  | probably high risk of bias | probably high risk of bias                | low risk of bias     | low risk of bias       | low risk of bias                  | low risk of bias |
|                       |                       | Rutgers      | 60   | probably high risk of bias | probably high risk of bias                | low risk of bias     | low risk of bias       | probably low risk of bias         | low risk of bias |
|                       |                       | Hamed        | 8    | probably high risk of bias | probably high risk of bias                | low risk of bias     | low risk of bias       | probably low risk of bias         | low risk of bias |
| barticitinib          | standard care/placebo |              | 1626 |                            |                                           |                      |                        |                                   |                  |

| Treatment 1 | Treatment 2           | First author | N    | Randomization    | Deviations from the intended intervention | Missing outcome data | Measurement of outcome | Selection of the reported results | Other                     |
|-------------|-----------------------|--------------|------|------------------|-------------------------------------------|----------------------|------------------------|-----------------------------------|---------------------------|
|             |                       | Marconi      | 1525 | low risk of bias | low risk of bias                          | low risk of bias     | low risk of bias       | low risk of bias                  | low risk of bias          |
|             |                       | Ely          | 101  | low risk of bias | low risk of bias                          | low risk of bias     | low risk of bias       | low risk of bias                  | low risk of bias          |
| tofacitinib | standard care/placebo |              | 0    |                  |                                           |                      |                        |                                   |                           |
|             |                       | Guimarães    | 0    | low risk of bias | low risk of bias                          | low risk of bias     | low risk of bias       | low risk of bias                  | probably low risk of bias |

Table 6. Risk of bias in RCTs reporting mechanical ventilation.

| Treatment 1           | Treatment 2           | First author | N    | Randomization              | Deviations from the intended intervention | Missing outcome data | Measurement of outcome | Selection of the reported results |
|-----------------------|-----------------------|--------------|------|----------------------------|-------------------------------------------|----------------------|------------------------|-----------------------------------|
| IL6i, corticosteroids | standard care/placebo |              | 4435 |                            |                                           |                      |                        |                                   |
|                       |                       | Salama       | 377  | probably low risk of bias  | low risk of bias                          | low risk of bias     | low risk of bias       | probably low risk of bias         |
|                       |                       | Gordon_1     | 552  | low risk of bias           | probably high risk of bias                | low risk of bias     | low risk of bias       | low risk of bias                  |
|                       |                       | Veiga        | 129  | low risk of bias           | probably high risk of bias                | low risk of bias     | low risk of bias       | low risk of bias                  |
|                       |                       | Lescure      | 306  | low risk of bias           | low risk of bias                          | low risk of bias     | low risk of bias       | low risk of bias                  |
|                       |                       | Soin         | 170  | probably high risk of bias | probably high risk of bias                | low risk of bias     | low risk of bias       | low risk of bias                  |
|                       |                       | Rosas_A      | 185  | low risk of bias           | probably high risk of bias                | low risk of bias     | low risk of bias       | low risk of bias                  |
|                       |                       | Rutgers      | 354  | probably high risk of bias | probably high risk of bias                | low risk of bias     | low risk of bias       | probably low risk of bias         |

| Treatment 1  | Treatment 2           | First author | N    | Randomization              | Deviations from the intended intervention | Missing outcome data | Measurement of outcome | Selection of the reported results |
|--------------|-----------------------|--------------|------|----------------------------|-------------------------------------------|----------------------|------------------------|-----------------------------------|
|              |                       | Hamed        | 49   | probably high risk of bias | probably high risk of bias                | low risk of bias     | low risk of bias       | probably low risk of bias         |
|              |                       | Hermine_toci | 445  | probably high risk of bias | probably high risk of bias                | low risk of bias     | low risk of bias       | low risk of bias                  |
|              |                       | Horby_5      | 1868 | low risk of bias           | probably high risk of bias                | low risk of bias     | low risk of bias       | low risk of bias                  |
| barticitinib | standard care/placebo |              | 2434 |                            |                                           |                      |                        |                                   |
|              |                       | Kalil        | 922  | low risk of bias           | low risk of bias                          | low risk of bias     | low risk of bias       | low risk of bias                  |
|              |                       | Marconi      | 1512 | low risk of bias           | low risk of bias                          | low risk of bias     | low risk of bias       | low risk of bias                  |
| ruxolitinib  | standard care/placebo |              | 472  |                            |                                           |                      |                        |                                   |
|              |                       | Cao_2        | 41   | low risk of bias           | probably high risk of bias                | low risk of bias     | low risk of bias       | probably low risk of bias         |
|              |                       | RUXCOVID     | 431  | low risk of bias           | low risk of bias                          | low risk of bias     | low risk of bias       | low risk of bias                  |
| tofacitinib  | standard care/placebo |              | 289  |                            |                                           |                      |                        |                                   |
|              |                       | Guimarães    | 289  | low risk of bias           | low risk of bias                          | low risk of bias     | low risk of bias       | low risk of bias                  |

Table 7. Risk of bias in RCTs reporting mortality.

| Treatment 1           | Treatment 2           | First author                    | N    | Randomization              | Deviations from the intended intervention | Missing outcome data      | Measurement of outcome | Selection of the reported results |
|-----------------------|-----------------------|---------------------------------|------|----------------------------|-------------------------------------------|---------------------------|------------------------|-----------------------------------|
| IL6i, corticosteroids | standard care/placebo |                                 | 7431 |                            |                                           |                           |                        |                                   |
|                       |                       | Rosas_A                         | 97   | low risk of bias           | probably high risk of bias                | low risk of bias          | low risk of bias       | low risk of bias                  |
|                       |                       | Hermine_A                       | 22   | low risk of bias           | probably high risk of bias                | low risk of bias          | low risk of bias       | low risk of bias                  |
|                       |                       | Salama_A                        | 312  | probably low risk of bias  | low risk of bias                          | low risk of bias          | low risk of bias       | probably low risk of bias         |
|                       |                       | Veiga_A                         | 65   | low risk of bias           | probably high risk of bias                | low risk of bias          | low risk of bias       | low risk of bias                  |
|                       |                       | Lescure                         | 416  | low risk of bias           | low risk of bias                          | low risk of bias          | low risk of bias       | probably low risk of bias         |
|                       |                       | Horby_5_A                       | 3385 | low risk of bias           | probably high risk of bias                | low risk of bias          | low risk of bias       | low risk of bias                  |
|                       |                       | Soin                            | 180  | probably high risk of bias | probably high risk of bias                | low risk of bias          | low risk of bias       | low risk of bias                  |
|                       |                       | ARCHITECTS_NCT04412772_A        | 20   | low risk of bias           | low risk of bias                          | low risk of bias          | low risk of bias       | low risk of bias                  |
|                       |                       | CORIMUNO-SARI-1_NCT04324073_A   | 7    | low risk of bias           | probably high risk of bias                | low risk of bias          | low risk of bias       | low risk of bias                  |
|                       |                       | CORIMUNO-SARI-ICU_NCT04324073_A | 2    | low risk of bias           | probably high risk of bias                | probably low risk of bias | low risk of bias       | low risk of bias                  |
|                       |                       | CORIMUNO-TOCI-ICU_NCT04331808_A | 12   | low risk of bias           | probably high risk of bias                | low risk of bias          | low risk of bias       | low risk of bias                  |
|                       |                       | COV-AID_NCT04330638_A           | 90   | low risk of bias           | probably high risk of bias                | low risk of bias          | low risk of bias       | low risk of bias                  |
|                       |                       | COVIDOSE2-SSA_NCT04479358_A     | 8    | low risk of bias           | probably high risk of bias                | low risk of bias          | low risk of bias       | low risk of bias                  |

| Treatment 1 | Treatment 2 | First author                    | N   | Randomization              | Deviations from the intended intervention | Missing outcome data | Measurement of outcome | Selection of the reported results |
|-------------|-------------|---------------------------------|-----|----------------------------|-------------------------------------------|----------------------|------------------------|-----------------------------------|
|             |             | COVIDSTORM_NCT04577534_A        | 30  | low risk of bias           | probably high risk of bias                | low risk of bias     | low risk of bias       | low risk of bias                  |
|             |             | COVITOX_NCT04435717_A           | 12  | low risk of bias           | probably high risk of bias                | low risk of bias     | low risk of bias       | low risk of bias                  |
|             |             | Gordon_1_A                      | 431 | low risk of bias           | probably high risk of bias                | low risk of bias     | low risk of bias       | low risk of bias                  |
|             |             | Gordon_1_B                      | 96  | low risk of bias           | probably high risk of bias                | low risk of bias     | low risk of bias       | low risk of bias                  |
|             |             | HMO-020-0224_NCT04377750_A      | 46  | probably low risk of bias  | low risk of bias                          | low risk of bias     | low risk of bias       | low risk of bias                  |
|             |             | ImmCoVA_NCT04409262_A           | 47  | probably high risk of bias | probably high risk of bias                | low risk of bias     | low risk of bias       | low risk of bias                  |
|             |             | REMDACTA_NCT04409262_A          | 539 | low risk of bias           | low risk of bias                          | low risk of bias     | low risk of bias       | low risk of bias                  |
|             |             | SARCOVID_NCT04357808_A          | 25  | low risk of bias           | probably high risk of bias                | low risk of bias     | low risk of bias       | low risk of bias                  |
|             |             | SARICOR_EudraCT2020-001531-27_A | 100 | low risk of bias           | probably high risk of bias                | low risk of bias     | low risk of bias       | low risk of bias                  |
|             |             | SARTRE_EudraCT2020-002037-15    | 140 | low risk of bias           | probably high risk of bias                | low risk of bias     | low risk of bias       | low risk of bias                  |
|             |             | Rutgers_A                       | 326 | probably high risk of bias | probably high risk of bias                | low risk of bias     | low risk of bias       | low risk of bias                  |
|             |             | Sivapalasingam_P2_A             | 76  | probably low risk of bias  | low risk of bias                          | low risk of bias     | low risk of bias       | low risk of bias                  |
|             |             | Sivapalasingam_P3_C1_A          | 444 | probably low risk of bias  | low risk of bias                          | low risk of bias     | low risk of bias       | low risk of bias                  |
|             |             | Hamed                           | 49  | probably high risk of bias | probably high risk of bias                | low risk of bias     | low risk of bias       | probably low risk of bias         |
|             |             | Hermine_toci                    | 450 | probably high risk of bias | probably high risk of bias                | low risk of bias     | low risk of bias       | low risk of bias                  |

| Treatment 1  | Treatment 2           | First author | N    | Randomization             | Deviations from the intended intervention | Missing outcome data | Measurement of outcome | Selection of the reported results |
|--------------|-----------------------|--------------|------|---------------------------|-------------------------------------------|----------------------|------------------------|-----------------------------------|
|              |                       | Stone_A      | 4    | probably low risk of bias | low risk of bias                          | low risk of bias     | low risk of bias       | low risk of bias                  |
| barticitinib | standard care/placebo |              | 2659 |                           |                                           |                      |                        |                                   |
|              |                       | Kalil        | 1033 | low risk of bias          | low risk of bias                          | low risk of bias     | low risk of bias       | low risk of bias                  |
|              |                       | Marconi      | 1525 | low risk of bias          | low risk of bias                          | low risk of bias     | low risk of bias       | low risk of bias                  |
|              |                       | Ely          | 101  | low risk of bias          | low risk of bias                          | low risk of bias     | low risk of bias       | low risk of bias                  |
| ruxolitinib  | standard care/placebo |              | 472  |                           |                                           |                      |                        |                                   |
|              |                       | Cao_2        | 41   | low risk of bias          | probably high risk of bias                | low risk of bias     | low risk of bias       | probably low risk of bias         |
|              |                       | RUXCOVID     | 431  | low risk of bias          | low risk of bias                          | low risk of bias     | low risk of bias       | low risk of bias                  |
| tofacitinib  | standard care/placebo |              | 289  |                           |                                           |                      |                        |                                   |
|              |                       | Guimarães    | 289  | low risk of bias          | low risk of bias                          | low risk of bias     | low risk of bias       | low risk of bias                  |

**Table 8.** Risk of bias in RCTs reporting time to symptom resolution.

| Treatment 1           | Treatment 2           | First author | N    | Randomization              | Deviations from the intended intervention | Missing outcome data | Measurement of outcome | Selection of the reported results | Other            |
|-----------------------|-----------------------|--------------|------|----------------------------|-------------------------------------------|----------------------|------------------------|-----------------------------------|------------------|
| IL6i, corticosteroids | standard care/placebo |              | 1410 |                            |                                           |                      |                        |                                   |                  |
|                       |                       | Rosas        | 438  | low risk of bias           | probably high risk of bias                | low risk of bias     | low risk of bias       | low risk of bias                  | low risk of bias |
|                       |                       | Salama       | 377  | probably low risk of bias  | low risk of bias                          | low risk of bias     | low risk of bias       | low risk of bias                  | low risk of bias |
|                       |                       | Lescure      | 416  | low risk of bias           | low risk of bias                          | low risk of bias     | low risk of bias       | low risk of bias                  | low risk of bias |
|                       |                       | Soin         | 179  | probably high risk of bias | probably high risk of bias                | low risk of bias     | low risk of bias       | low risk of bias                  | low risk of bias |
| barticitinib          | standard care/placebo |              | 2558 |                            |                                           |                      |                        |                                   |                  |
|                       |                       | Kalil        | 1033 | low risk of bias           | low risk of bias                          | low risk of bias     | low risk of bias       | low risk of bias                  | low risk of bias |
|                       |                       | Marconi      | 1525 | low risk of bias           | low risk of bias                          | low risk of bias     | low risk of bias       | low risk of bias                  | low risk of bias |
| ruxolitinib           | standard care/placebo |              | 472  |                            |                                           |                      |                        |                                   |                  |
|                       |                       | Cao_2        | 41   | low risk of bias           | probably high risk of bias                | low risk of bias     | low risk of bias       | probably low risk of bias         | low risk of bias |
|                       |                       | RUXCOVID     | 431  | low risk of bias           | low risk of bias                          | low risk of bias     | low risk of bias       | low risk of bias                  | low risk of bias |

Table 9. Risk of bias in RCTs reporting time to viral clearance.

| Treatment 1 | Treatment 2           | First author | N  | Randomization    | Deviations from the intended intervention | Missing outcome data | Measurement of outcome | Selection of the reported results | Other                     |
|-------------|-----------------------|--------------|----|------------------|-------------------------------------------|----------------------|------------------------|-----------------------------------|---------------------------|
| ruxolitinib | standard care/placebo |              | 17 |                  |                                           |                      |                        |                                   |                           |
|             |                       | Cao_2        | 17 | low risk of bias | probably high risk of bias                | low risk of bias     | low risk of bias       | probably low risk of bias         | probably low risk of bias |

Table 10. Risk of bias in RCTs reporting ventilator-free days.

| Treatment 1           | Treatment 2           | First author | N    | Randomization              | Deviations from the intended intervention | Missing outcome data | Measurement of outcome | Selection of the reported results | Other            |
|-----------------------|-----------------------|--------------|------|----------------------------|-------------------------------------------|----------------------|------------------------|-----------------------------------|------------------|
| IL6i, corticosteroids | standard care/placebo |              | 1299 |                            |                                           |                      |                        |                                   |                  |
|                       |                       | Rosas        | 438  | low risk of bias           | probably high risk of bias                | low risk of bias     | low risk of bias       | low risk of bias                  | low risk of bias |
|                       |                       | Gordon_1     | 553  | low risk of bias           | probably high risk of bias                | low risk of bias     | low risk of bias       | low risk of bias                  | low risk of bias |
|                       |                       | Veiga        | 129  | low risk of bias           | probably high risk of bias                | low risk of bias     | low risk of bias       | low risk of bias                  | low risk of bias |
|                       |                       | Soin         | 179  | probably high risk of bias | probably high risk of bias                | low risk of bias     | low risk of bias       | low risk of bias                  | low risk of bias |
| barticitinib          | standard care/placebo |              | 1619 |                            |                                           |                      |                        |                                   |                  |
|                       |                       | Marconi      | 1518 | low risk of bias           | low risk of bias                          | low risk of bias     | low risk of bias       | low risk of bias                  | low risk of bias |
|                       |                       | Ely          | 101  | low risk of bias           | low risk of bias                          | low risk of bias     | low risk of bias       | low risk of bias                  | low risk of bias |

**Figures 1-2.** Forest plots: Adverse events leading to discontinuation.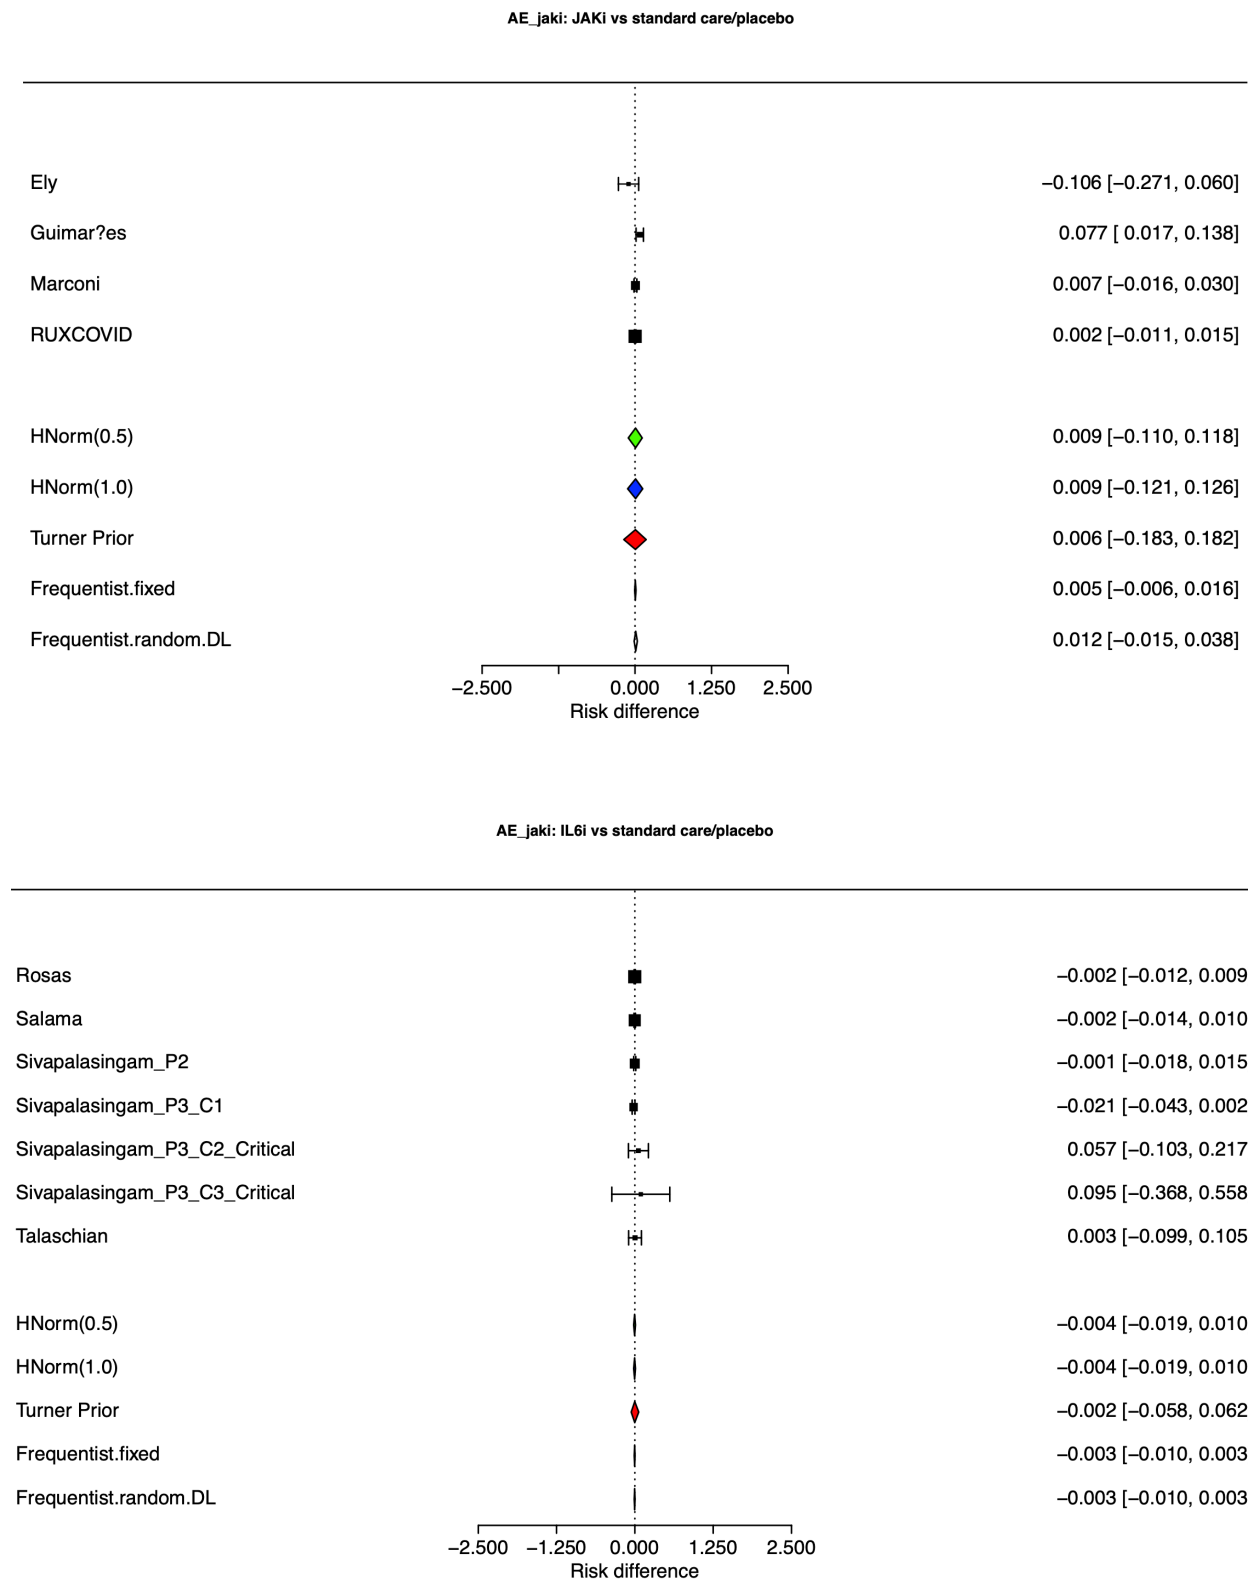

**Figures 3-6.** Forest plots: Duration of hospitalisation.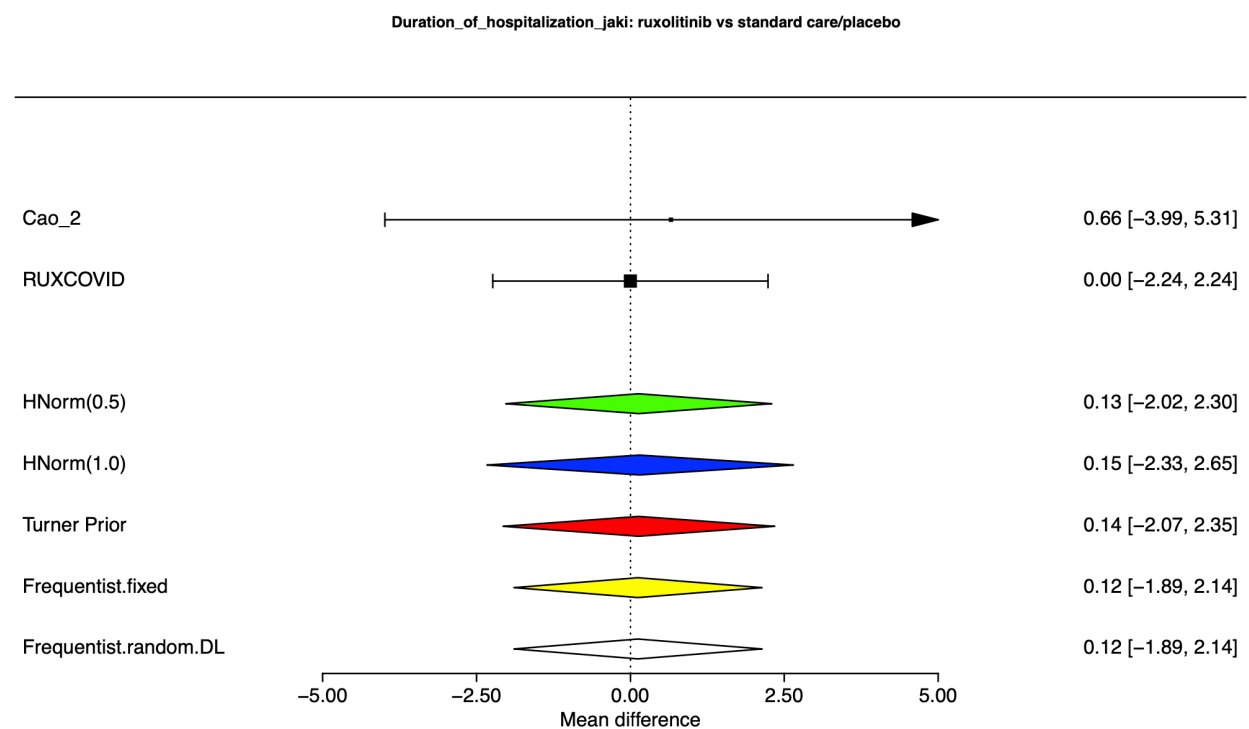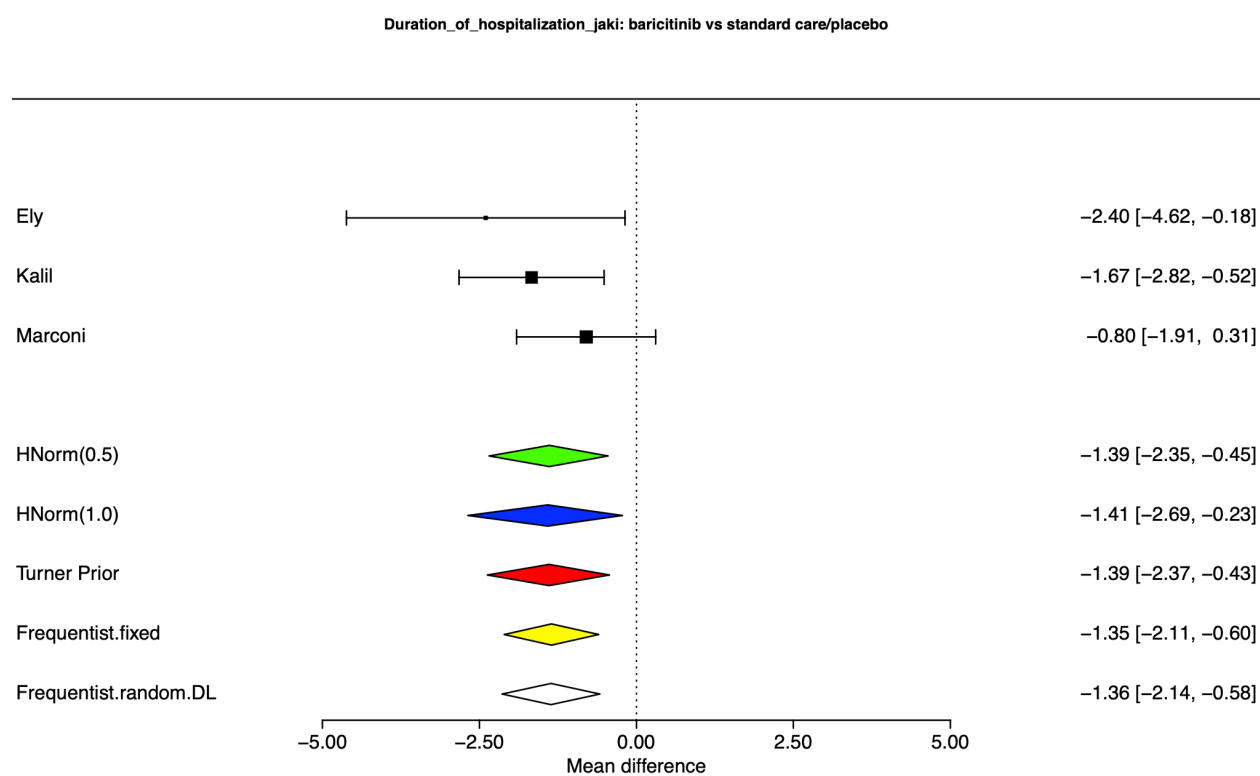

Duration\_of\_hospitalization\_jaki: tofacitinib vs standard care/placebo

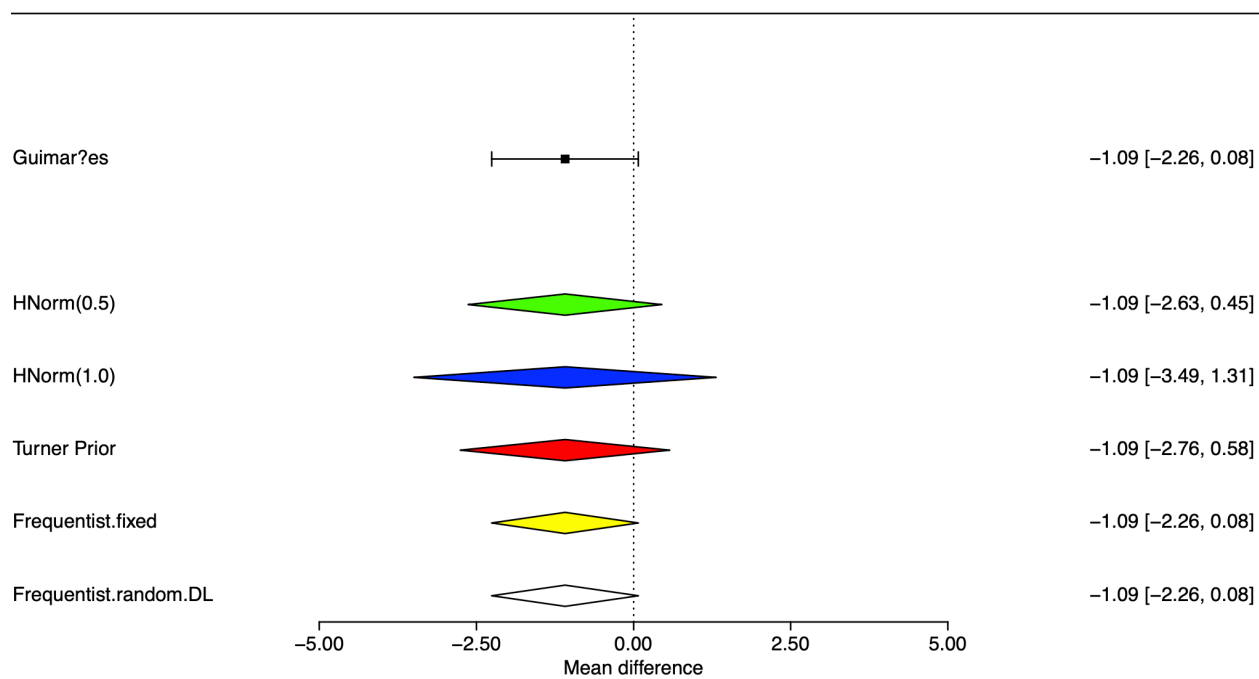

Duration\_of\_hospitalization\_jaki: corticosteroids, IL6i vs standard care/placebo

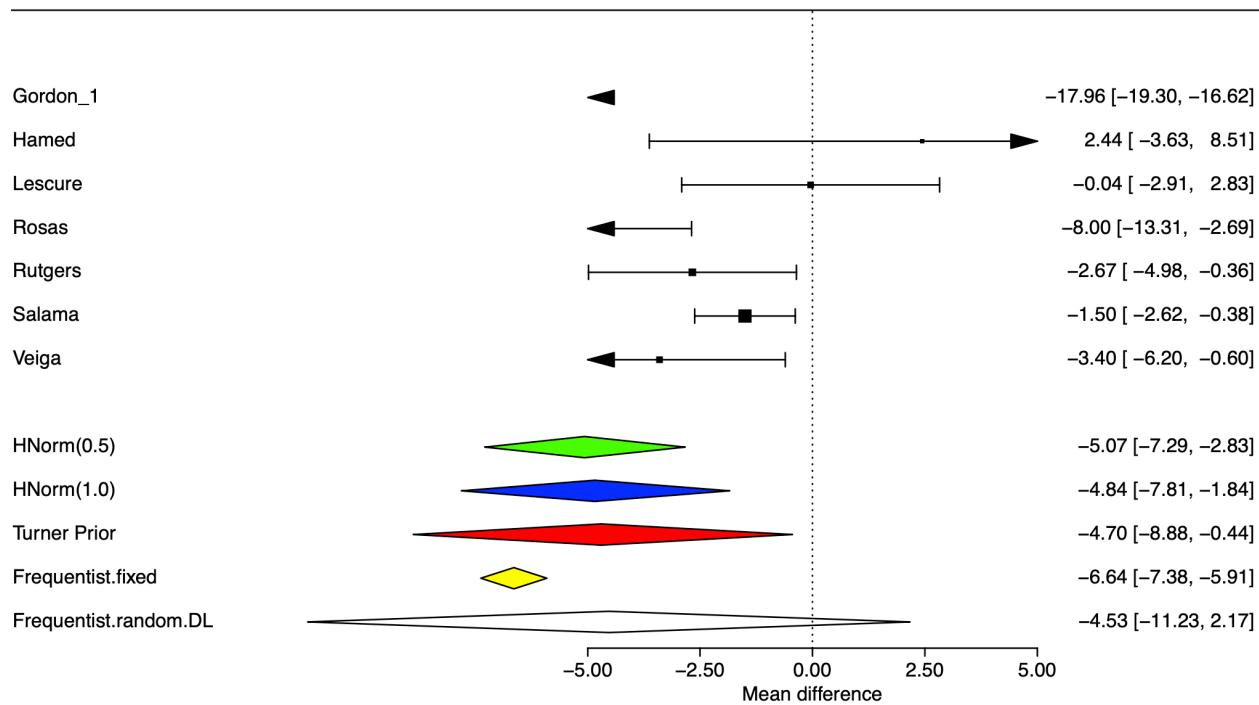

**Figure 7-8.** Forest plots: Duration of ventilation.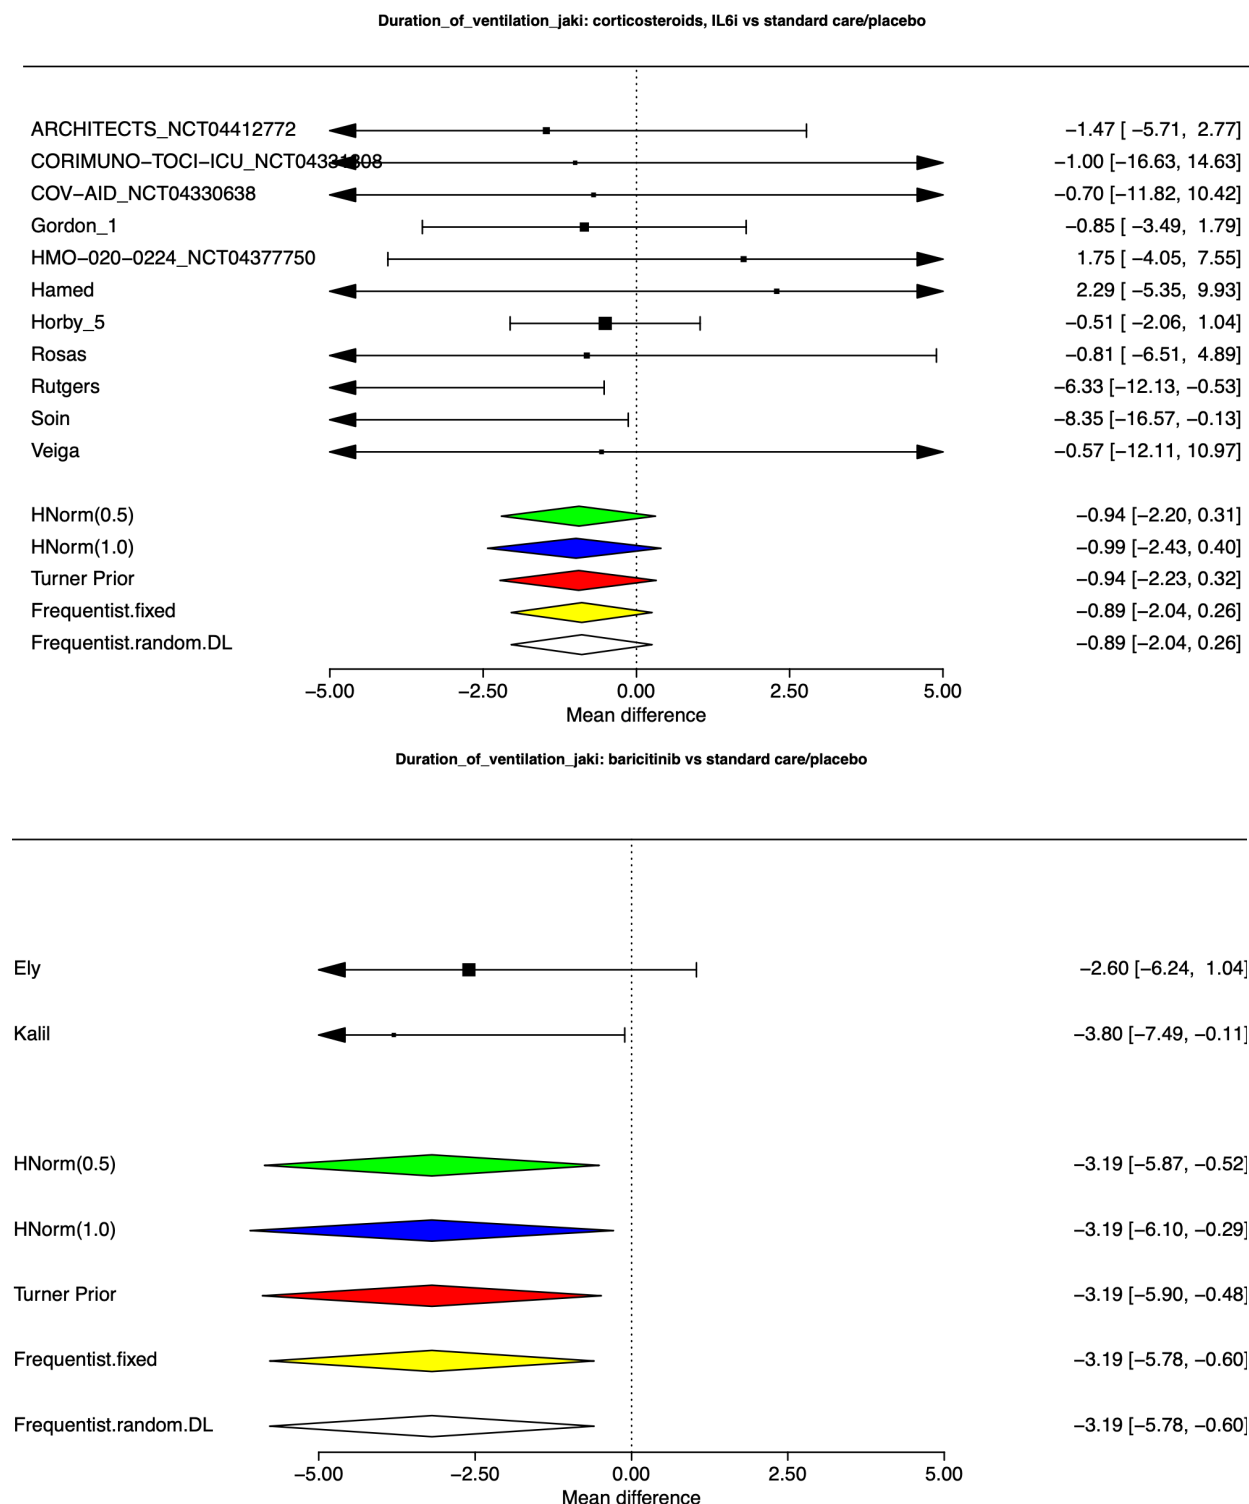

**Figure 9-10.** Forest plots: ICU length of stay.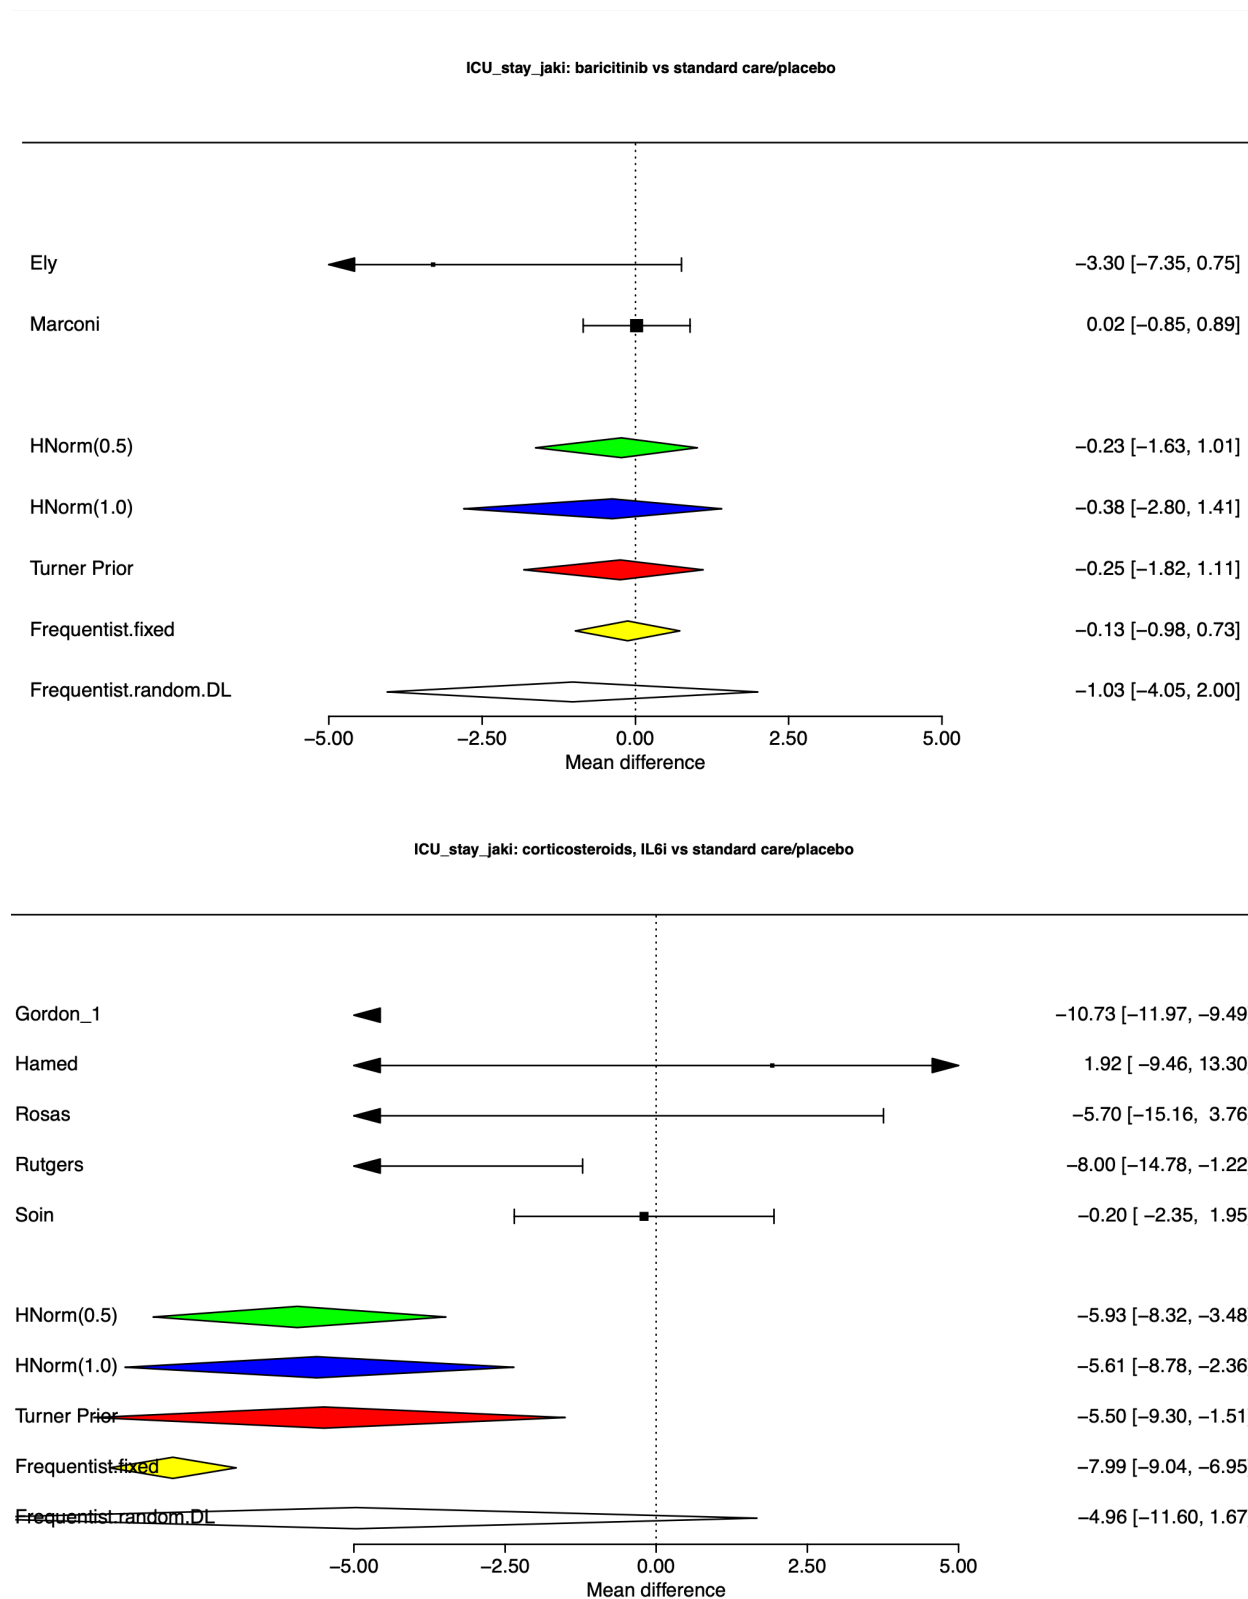

Figure 11-14. Forest plots: Mortality.

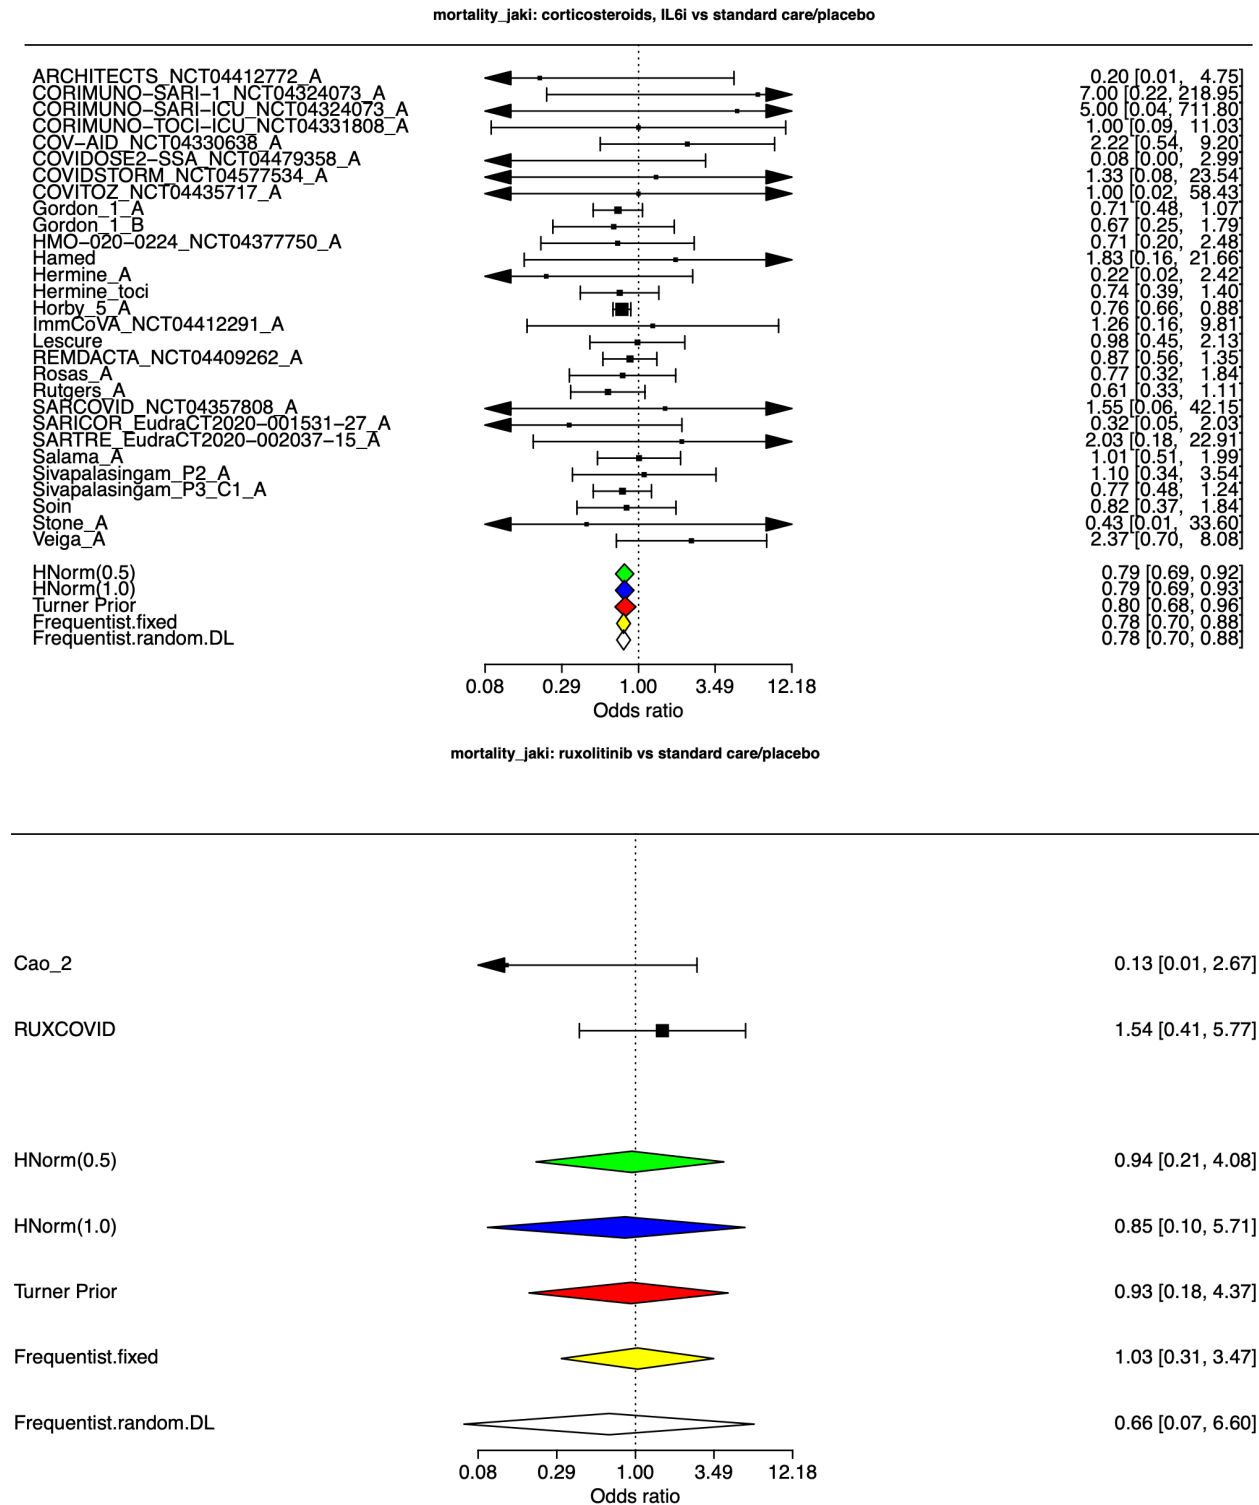

mortality\_jaki: baricitinib vs standard care/placebo

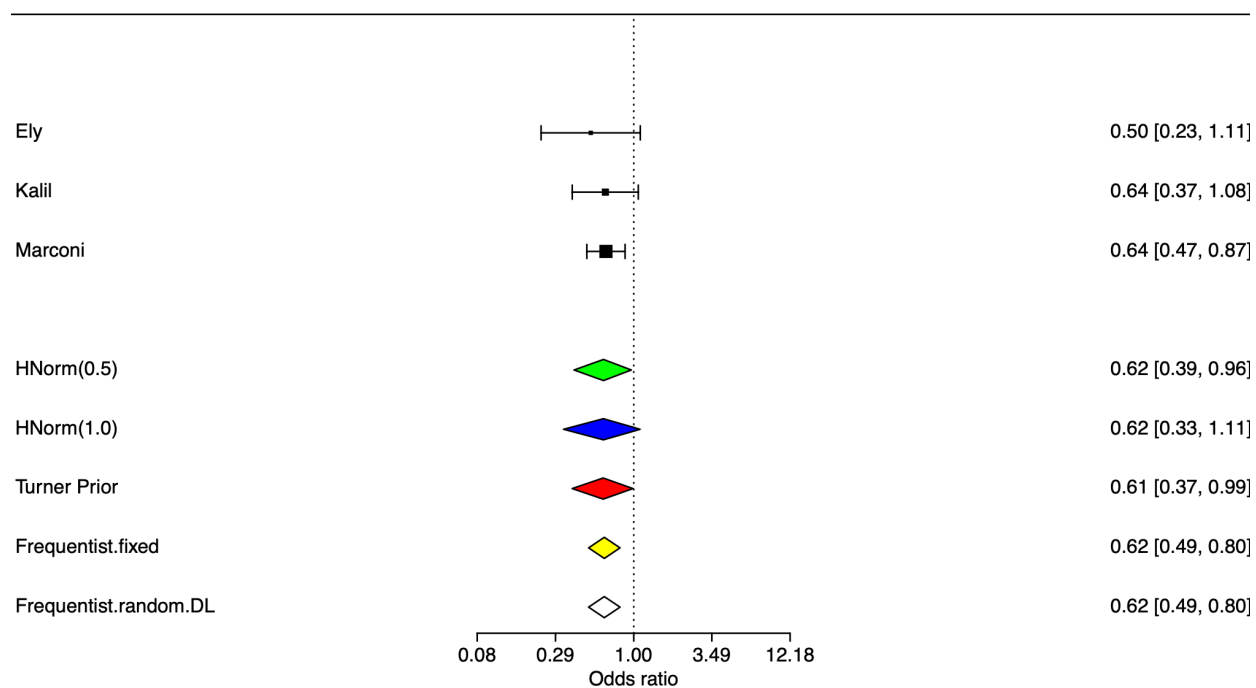

mortality\_jaki: tofacitinib vs standard care/placebo

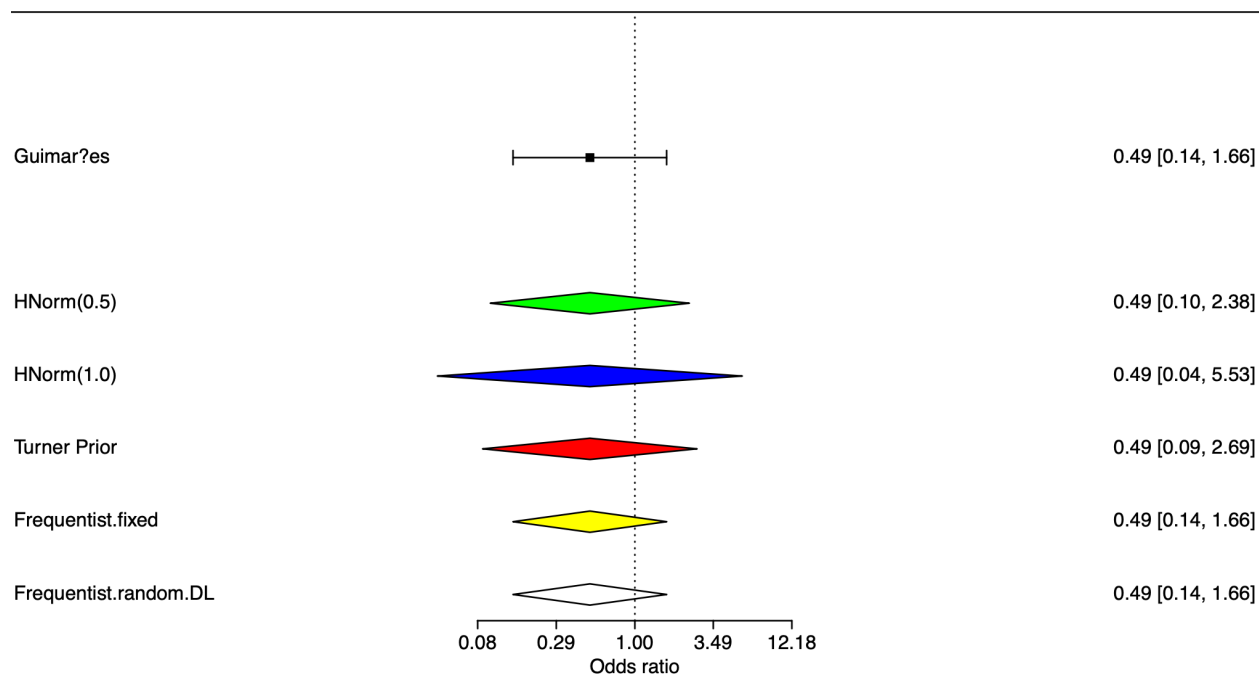

**Figure 15-18.** Forest plots: Mechanical ventilation.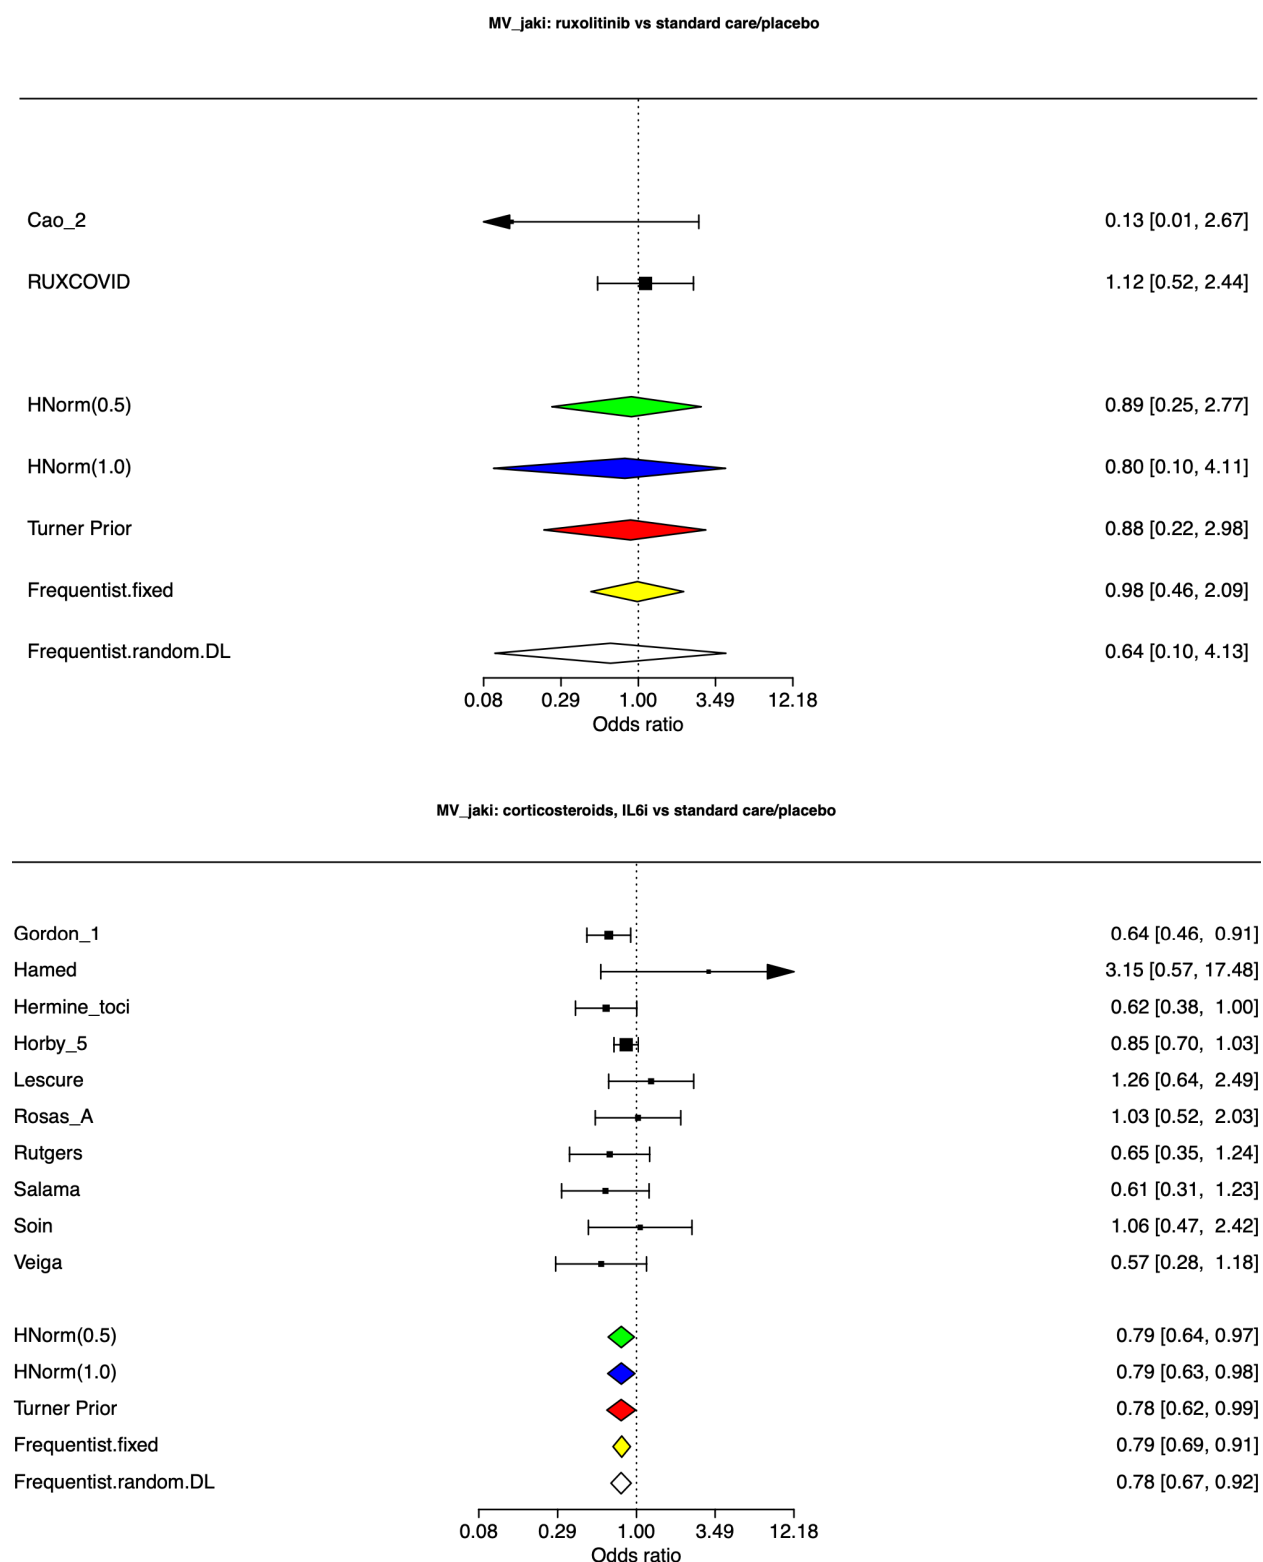

## MV\_jaki: tofacitinib vs standard care/placebo

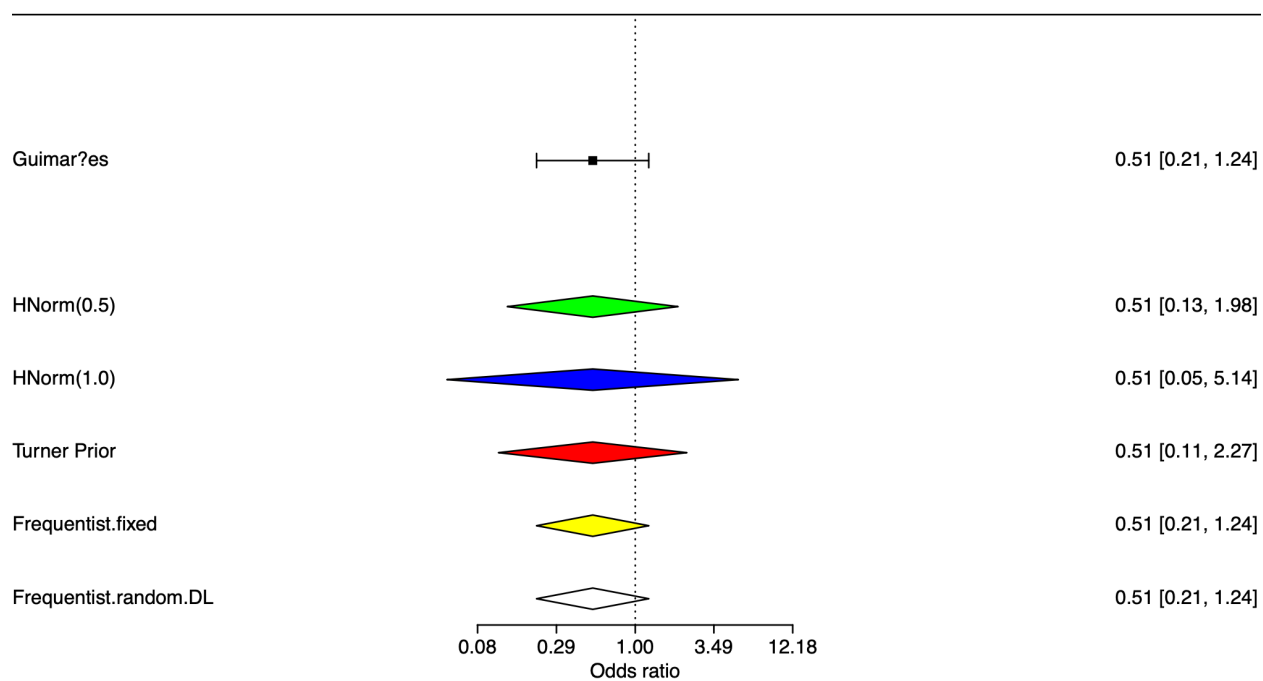

## MV\_jaki: baricitinib vs standard care/placebo

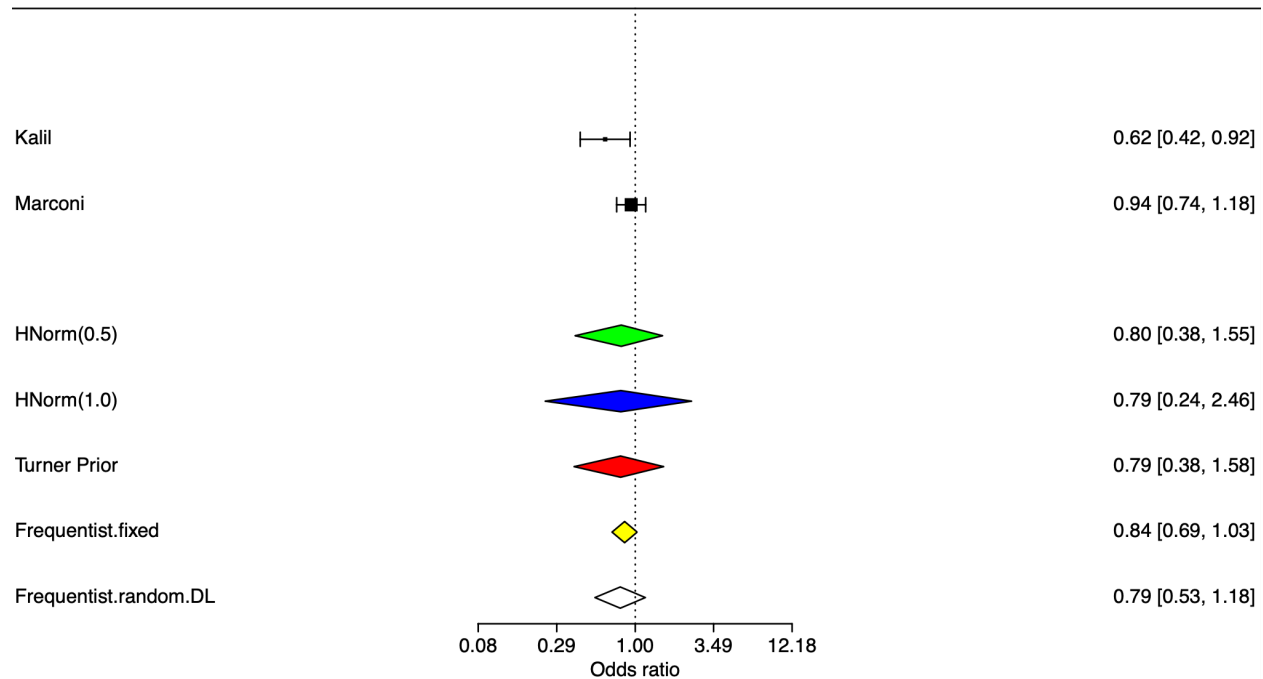

**Figures 19-21.** Forest plots: Time to symptom resolution.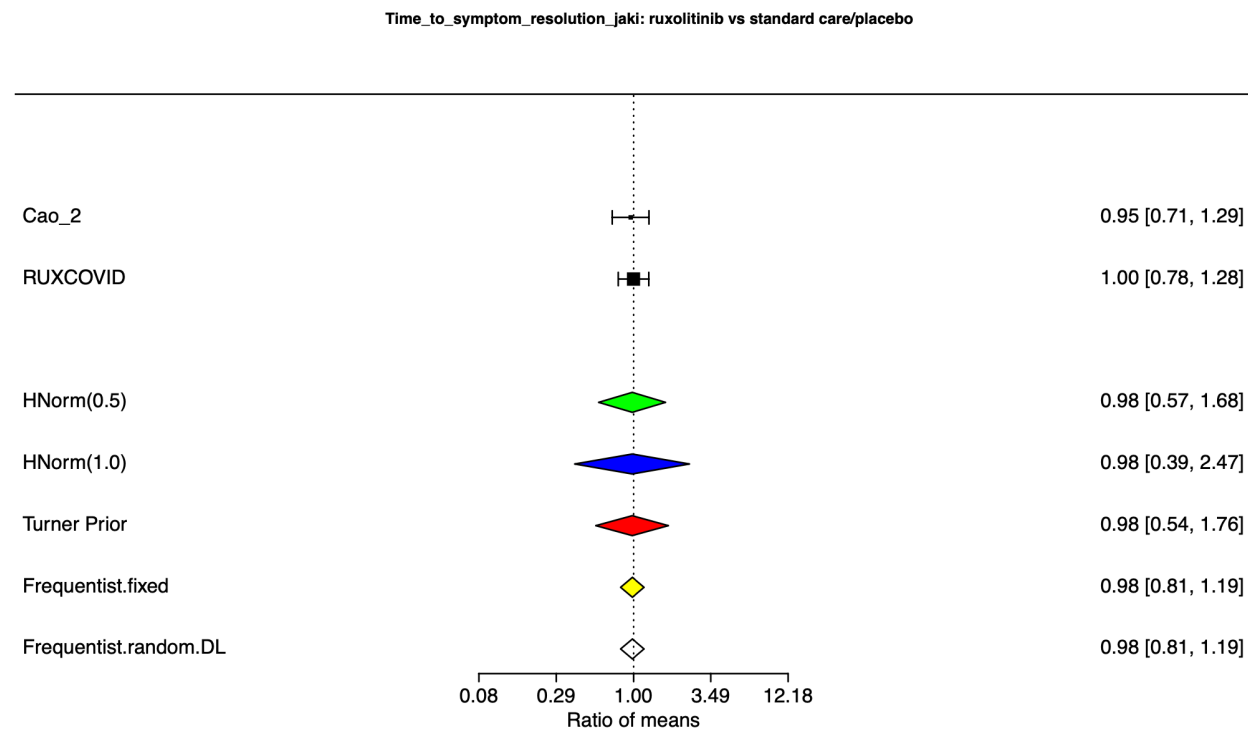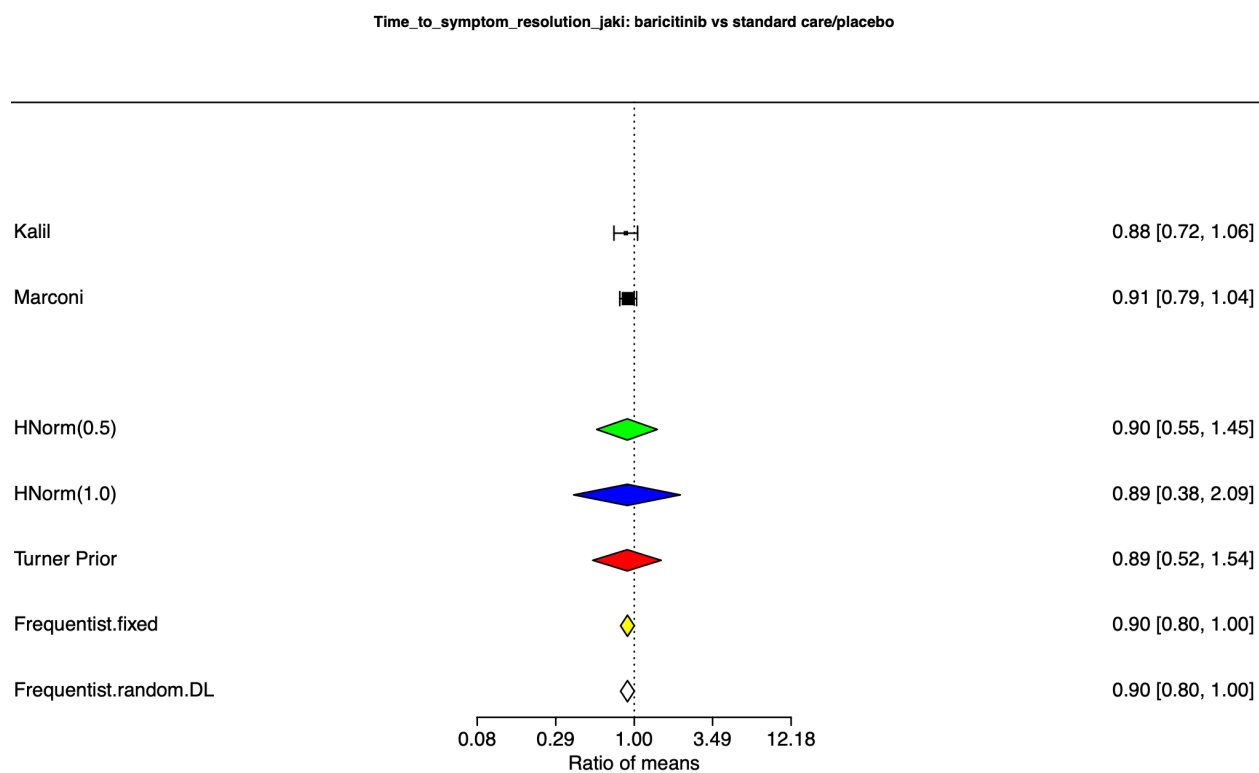

Time\_to\_symptom\_resolution\_jaki: corticosteroids, IL6i vs standard care/placebo

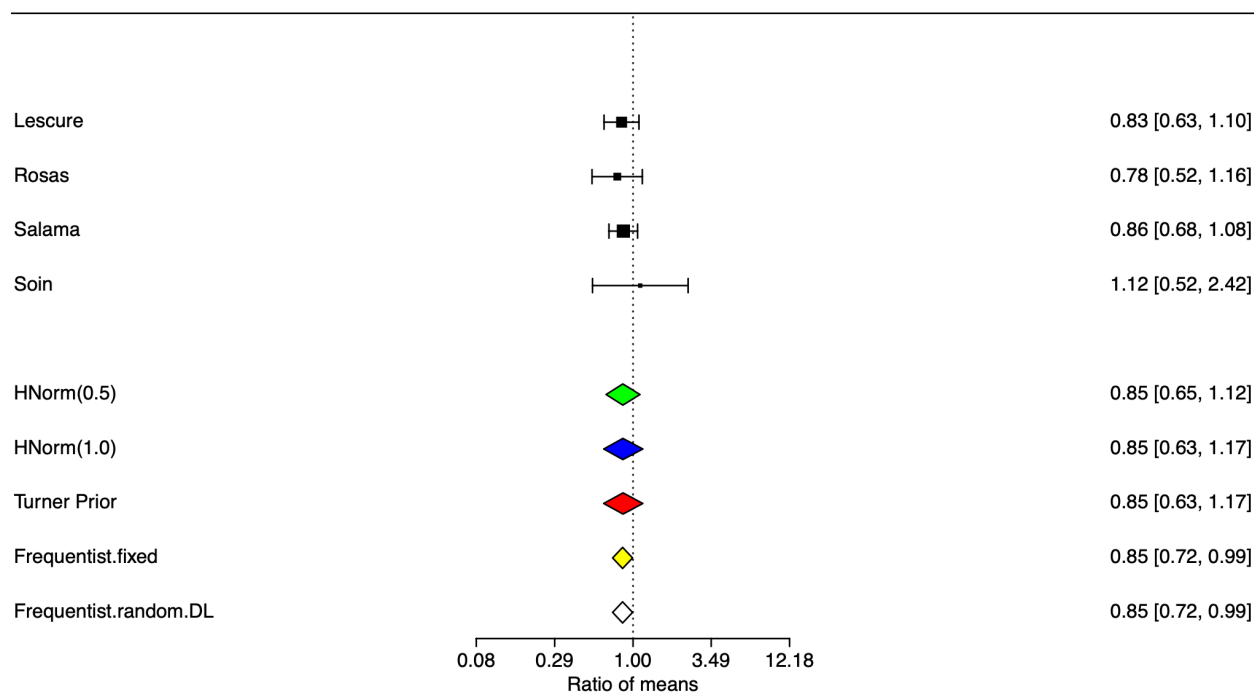**Figure 22.** Forest plot: Time to viral clearance.

Time\_to\_viral\_clearance\_jaki: JAK inhibitors vs standard care/placebo

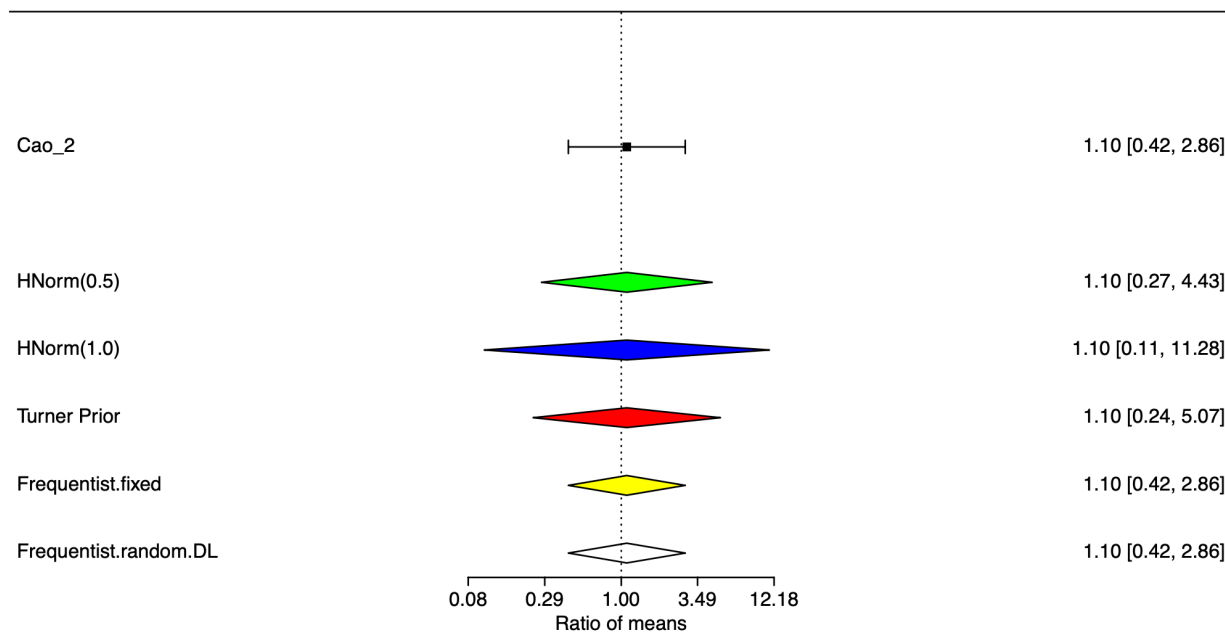

**Figures 23-24.** Forest plot: Ventilator-free days.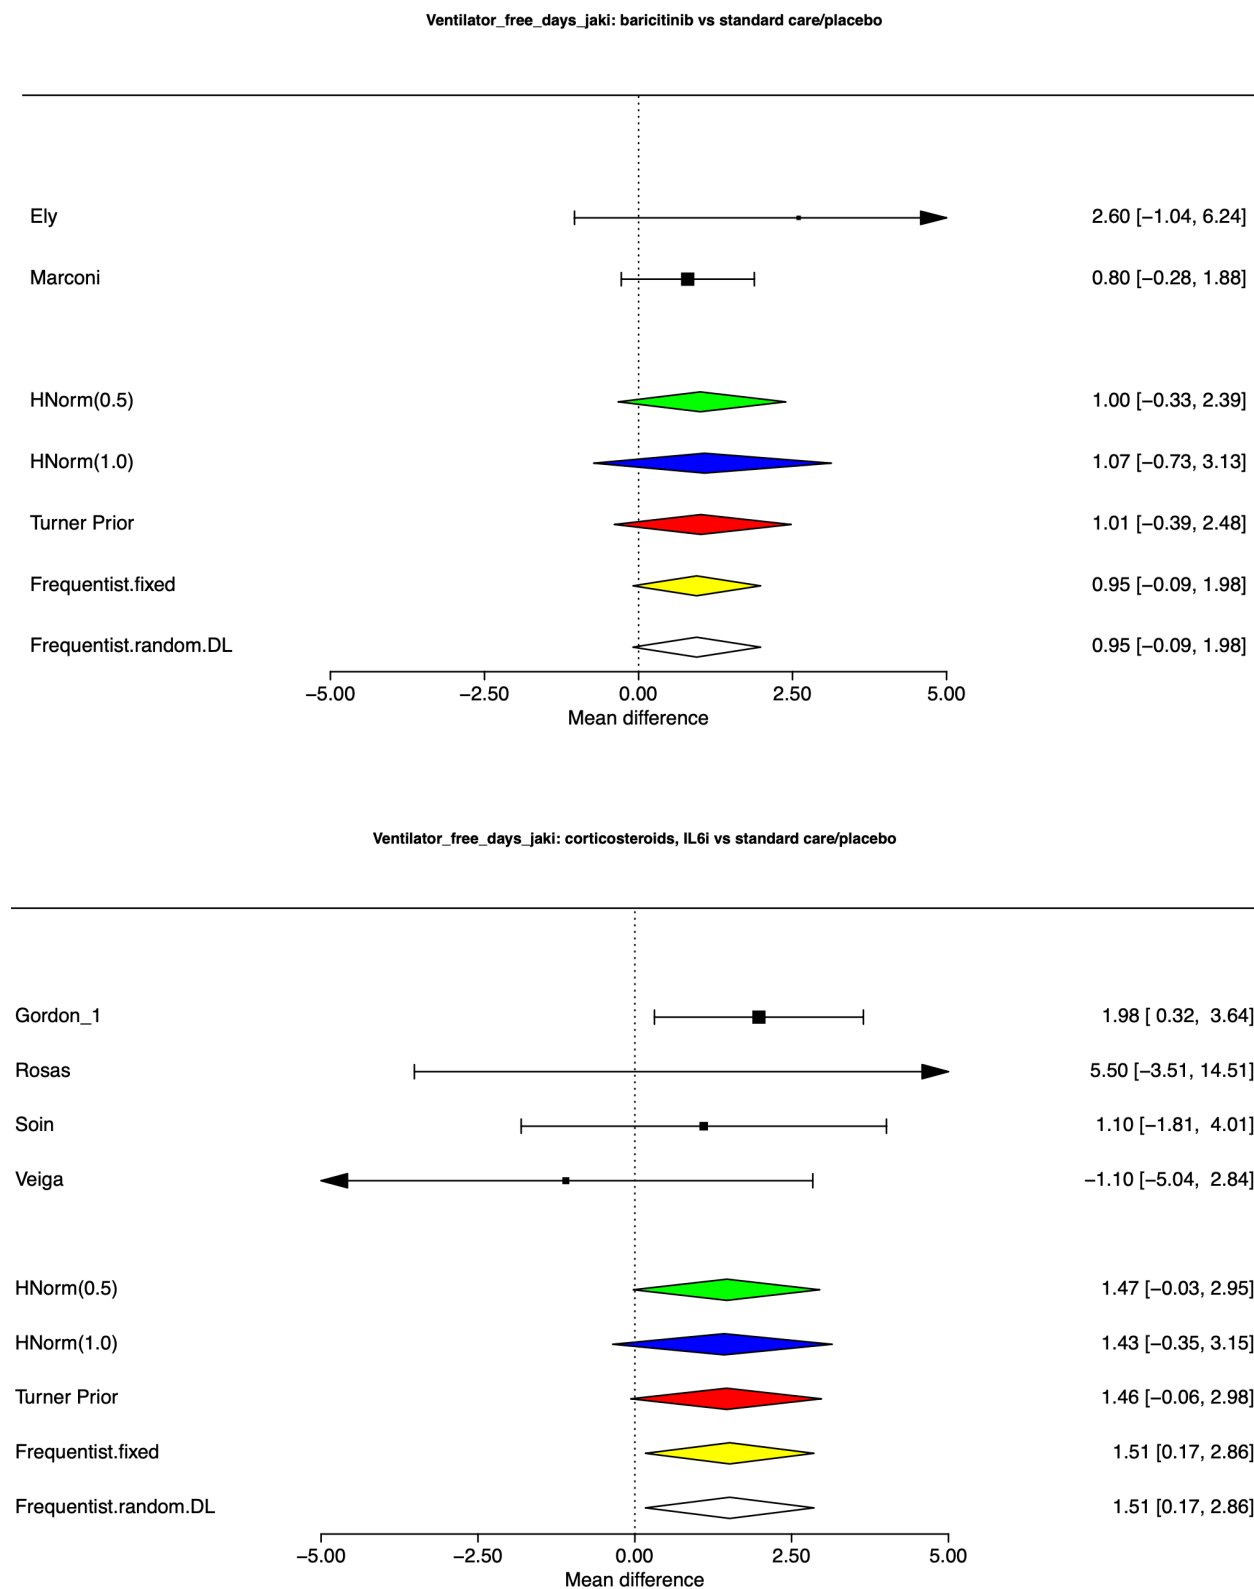

**Figure 25.** Network plot for adverse events leading to discontinuation.

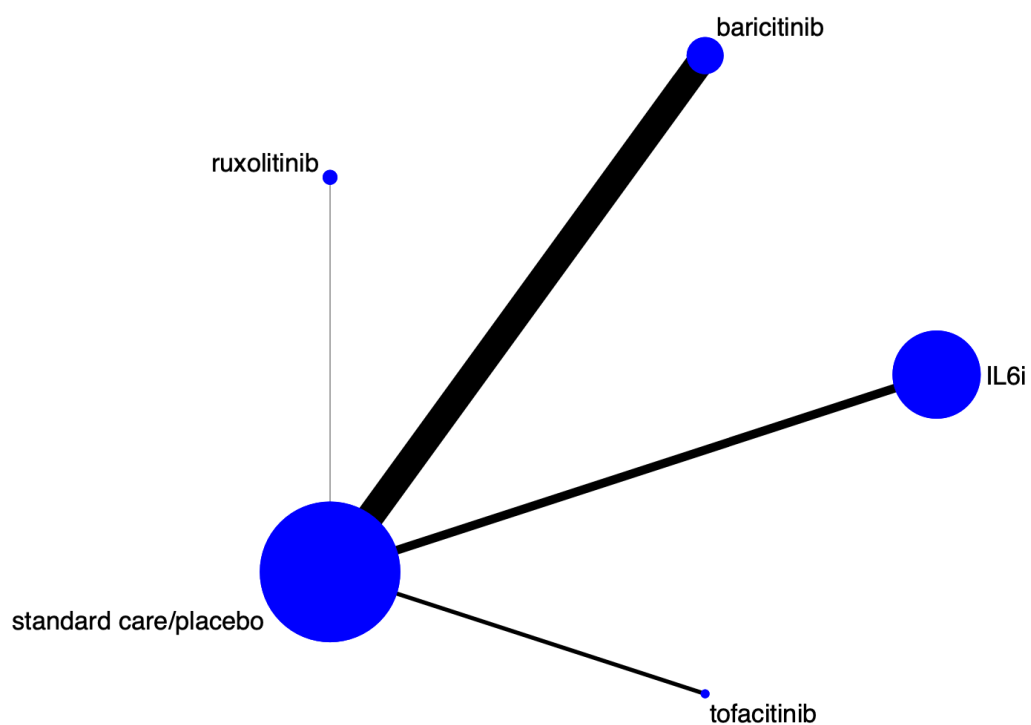

**Figure 26.** Network plot for duration of hospitalisation.

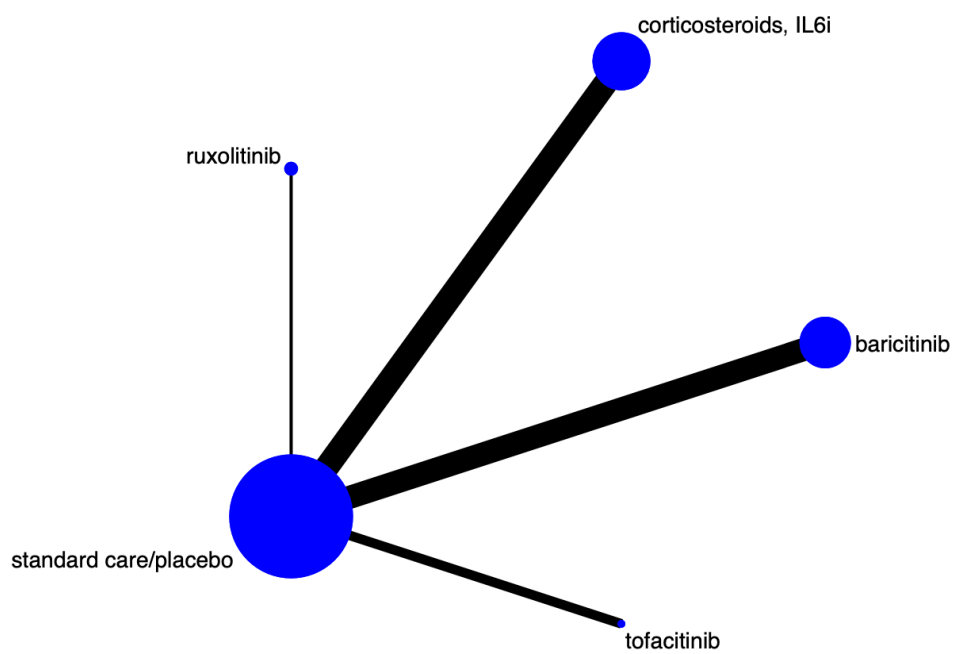

**Figure 27.** Network plot for duration of ventilation.

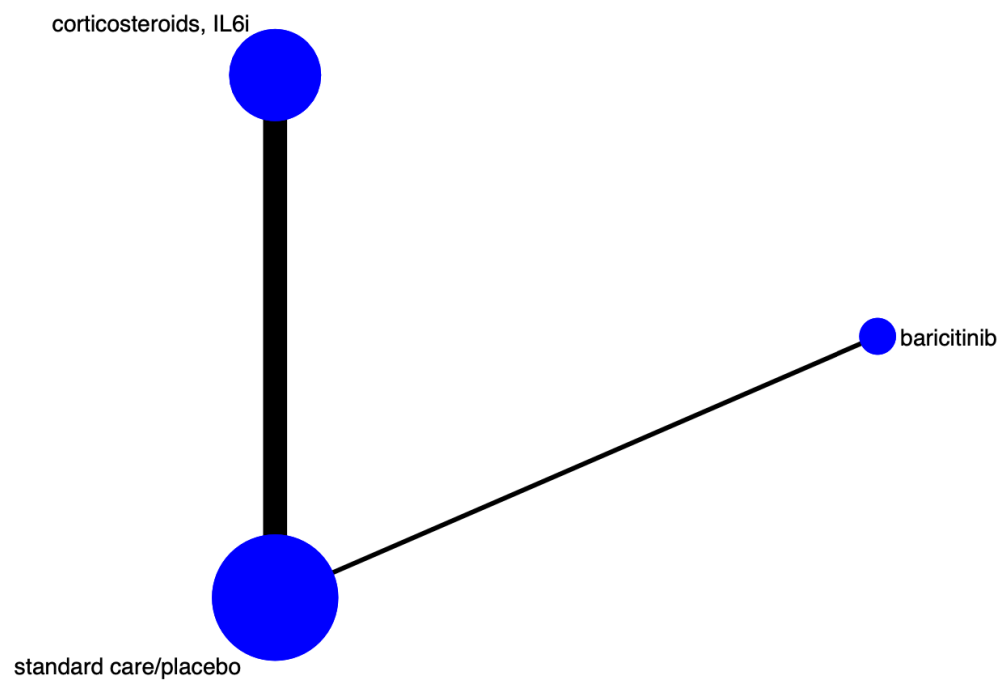

**Figure 28.** Network plot for ICU length of stay.

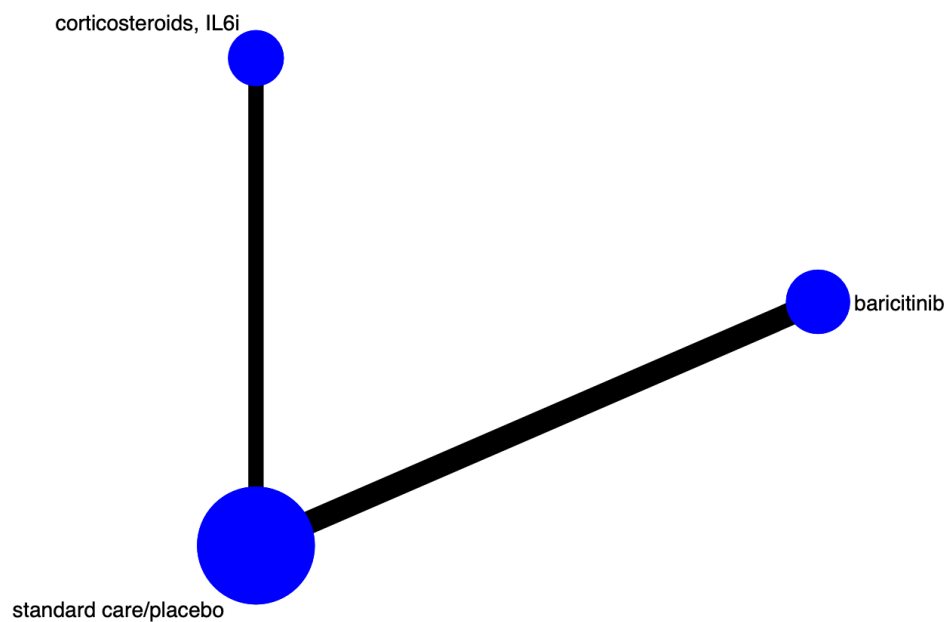

**Figure 29.** Network plot for mechanical ventilation.

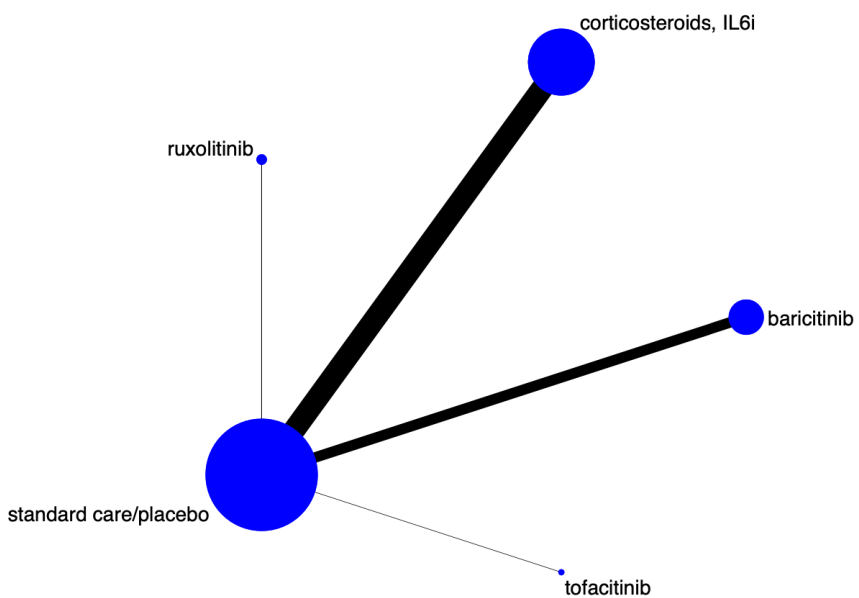

**Figure 30.** Network plot for mortality.

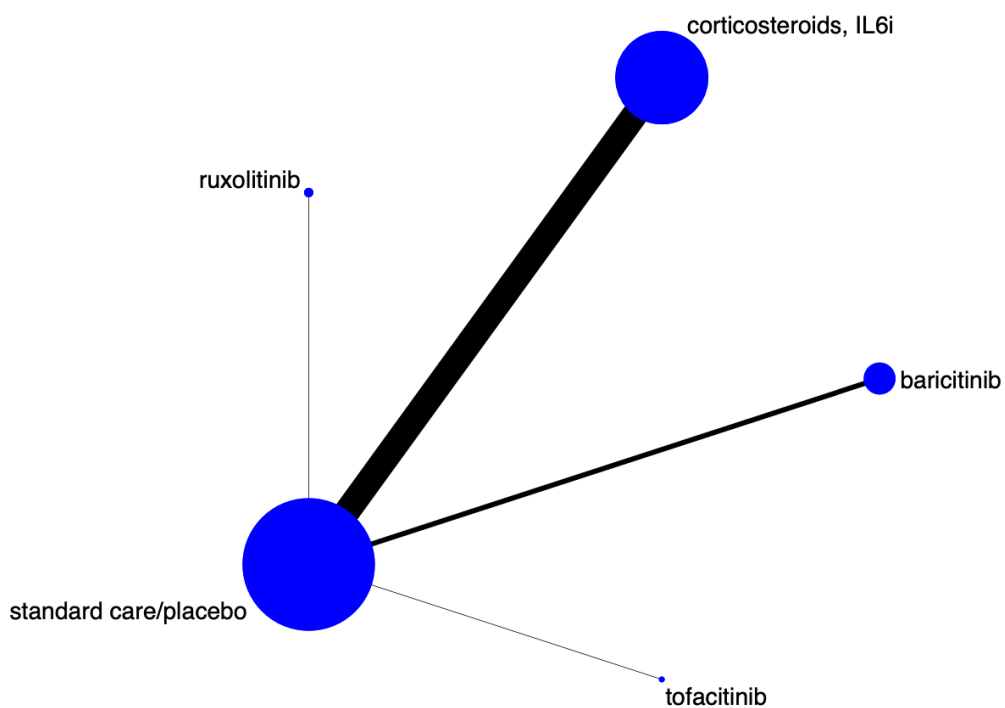

**Figure 31.** Network plot for time to symptom resolution.

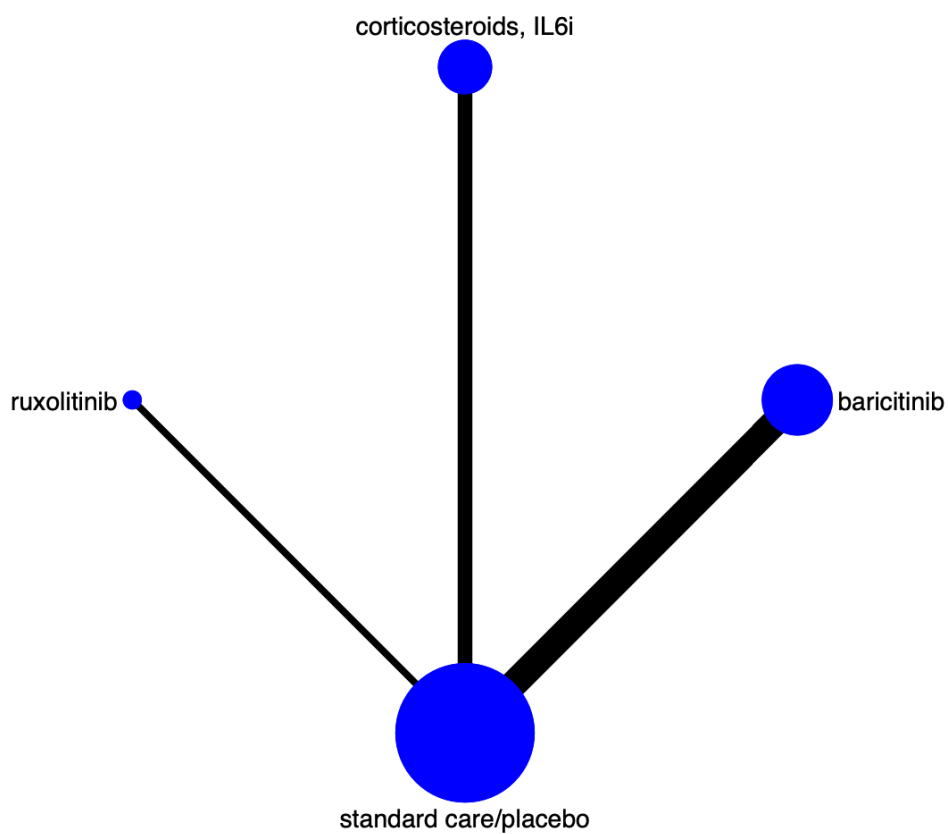

**Figure 32.** Network plot for ventilator-free days.

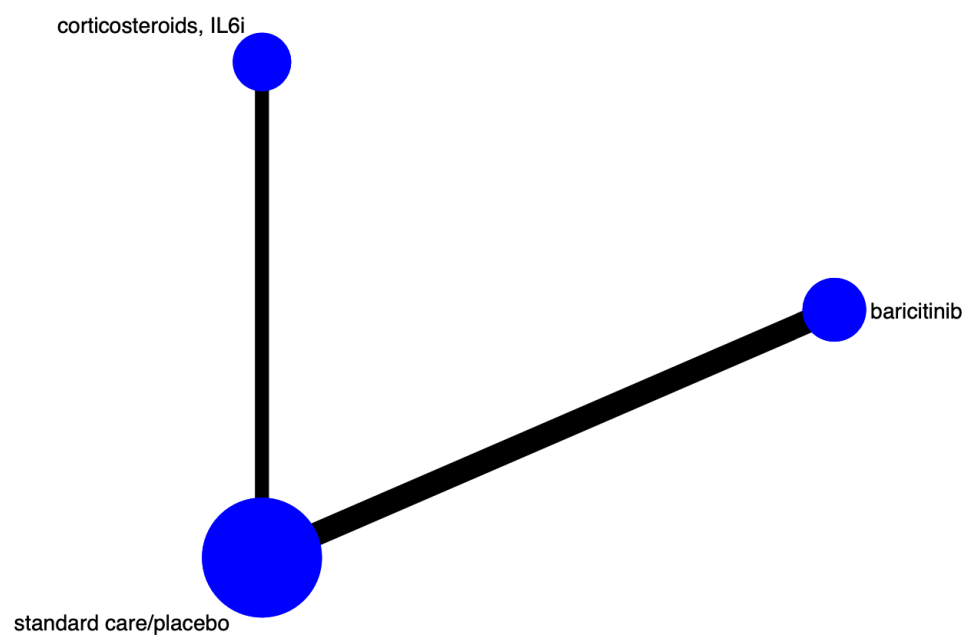

**Table 11.** Meta-analysis results, including direct, indirect, and network estimates.

| Intervention 1                                                                                                      | Intervention 2                            | DIRECT ESTIMATES |          |          |                           |          |          | INDIRECT ESTIMATES |          |          |                           |          |          | NETWORK ESTIMATES |          |          |                           |          |          |
|---------------------------------------------------------------------------------------------------------------------|-------------------------------------------|------------------|----------|----------|---------------------------|----------|----------|--------------------|----------|----------|---------------------------|----------|----------|-------------------|----------|----------|---------------------------|----------|----------|
|                                                                                                                     |                                           | Relative effect  |          |          | Absolute effect per 1,000 |          |          | Relative effect    |          |          | Absolute effect per 1,000 |          |          | Relative effect   |          |          | Absolute effect per 1,000 |          |          |
|                                                                                                                     |                                           | Point estimate   | Lower CI | Upper CI | Point estimate            | Lower CI | Upper CI | Point estimate     | Lower CI | Upper CI | Point estimate            | Lower CI | Upper CI | Point estimate    | Lower CI | Upper CI | Point estimate            | Lower CI | Upper CI |
| Adverse events leading to discontinuation – Relative effect estimate: NA; Absolute effect estimate: Risk difference |                                           |                  |          |          |                           |          |          |                    |          |          |                           |          |          |                   |          |          |                           |          |          |
| baricitinib                                                                                                         | standard care/placebo                     | NA               | NA       | NA       | -39.16                    | -599.42  | 503.23   | NA                 | NA       | NA       | NA                        | NA       | NA       | NA                | NA       | NA       | 4.57                      | -18.26   | 27.56    |
| corticosteroids, IL6 receptor antagonists                                                                           | standard care/placebo                     | NA               | NA       | NA       | -1.71                     | -58.29   | 62.04    | NA                 | NA       | NA       | NA                        | NA       | NA       | NA                | NA       | NA       | -3.37                     | -10.24   | 3.48     |
| ruxolitinib                                                                                                         | standard care/placebo                     | NA               | NA       | NA       | 1.85                      | 1260.17  | 1263.90  | NA                 | NA       | NA       | NA                        | NA       | NA       | NA                | NA       | NA       | 1.84                      | -11.00   | 14.61    |
| tofacitinib                                                                                                         | standard care/placebo                     | NA               | NA       | NA       | 77.46                     | 1185.47  | 1340.43  | NA                 | NA       | NA       | NA                        | NA       | NA       | NA                | NA       | NA       | 77.45                     | 17.06    | 137.36   |
| baricitinib                                                                                                         | corticosteroids, IL6 receptor antagonists | NA               | NA       | NA       | NA                        | NA       | NA       | NA                 | NA       | NA       | 7.94                      | -15.90   | 31.88    | NA                | NA       | NA       | 7.94                      | -15.90   | 31.88    |
| baricitinib                                                                                                         | ruxolitinib                               | NA               | NA       | NA       | NA                        | NA       | NA       | NA                 | NA       | NA       | 2.77                      | -23.45   | 29.04    | NA                | NA       | NA       | 2.77                      | -23.45   | 29.04    |
| baricitinib                                                                                                         | tofacitinib                               | NA               | NA       | NA       | NA                        | NA       | NA       | NA                 | NA       | NA       | -72.91                    | -136.97  | -7.92    | NA                | NA       | NA       | -72.91                    | -136.97  | -7.92    |
| corticosteroids, IL6 receptor antagonists                                                                           | ruxolitinib                               | NA               | NA       | NA       | NA                        | NA       | NA       | NA                 | NA       | NA       | -5.20                     | -19.71   | 9.30     | NA                | NA       | NA       | -5.20                     | -19.71   | 9.30     |
| corticosteroids, IL6 receptor antagonists                                                                           | tofacitinib                               | NA               | NA       | NA       | NA                        | NA       | NA       | NA                 | NA       | NA       | -80.75                    | -141.11  | -19.92   | NA                | NA       | NA       | -80.75                    | -141.11  | -19.92   |
| ruxolitinib                                                                                                         | tofacitinib                               | NA               | NA       | NA       | NA                        | NA       | NA       | NA                 | NA       | NA       | -75.67                    | -136.85  | -13.91   | NA                | NA       | NA       | -75.67                    | -136.85  | -13.91   |
| Duration of hospitalisation – Relative effect estimate: NA; Absolute effect estimate: mean difference               |                                           |                  |          |          |                           |          |          |                    |          |          |                           |          |          |                   |          |          |                           |          |          |
| baricitinib                                                                                                         | standard care/placebo                     | NA               | NA       | NA       | -1.39                     | -2.37    | -0.43    | NA                 | NA       | NA       | NA                        | NA       | NA       | NA                | NA       | NA       | -1.62                     | -7.26    | 4.04     |
| corticosteroids, IL6 receptor antagonists                                                                           | standard care/placebo                     | NA               | NA       | NA       | -4.70                     | -8.88    | -0.44    | NA                 | NA       | NA       | NA                        | NA       | NA       | NA                | NA       | NA       | -4.72                     | -8.52    | -0.78    |
| ruxolitinib                                                                                                         | standard care/placebo                     | NA               | NA       | NA       | 0.14                      | -2.07    | 2.35     | NA                 | NA       | NA       | NA                        | NA       | NA       | NA                | NA       | NA       | 0.30                      | -6.95    | 7.64     |



| Intervention 1                                                                              | Intervention 2                            | DIRECT ESTIMATES |          |          |                           |          |          | INDIRECT ESTIMATES |          |          |                           |          |          | NETWORK ESTIMATES |          |          |                           |          |          |
|---------------------------------------------------------------------------------------------|-------------------------------------------|------------------|----------|----------|---------------------------|----------|----------|--------------------|----------|----------|---------------------------|----------|----------|-------------------|----------|----------|---------------------------|----------|----------|
|                                                                                             |                                           | Relative effect  |          |          | Absolute effect per 1,000 |          |          | Relative effect    |          |          | Absolute effect per 1,000 |          |          | Relative effect   |          |          | Absolute effect per 1,000 |          |          |
|                                                                                             |                                           | Point estimate   | Lower CI | Upper CI | Point estimate            | Lower CI | Upper CI | Point estimate     | Lower CI | Upper CI | Point estimate            | Lower CI | Upper CI | Point estimate    | Lower CI | Upper CI | Point estimate            | Lower CI | Upper CI |
| baricitinib                                                                                 | standard care/placebo                     | 0.79             | 0.38     | 1.58     | -21.93                    | -68.78   | 55.41    | NA                 | NA       | NA       | NA                        | NA       | NA       | 0.80              | 0.52     | 1.19     | -19.96                    | -52.47   | 19.05    |
| corticosteroids, IL6 receptor antagonists                                                   | standard care/placebo                     | 0.78             | 0.62     | 0.99     | -22.70                    | -40.21   | -1.27    | NA                 | NA       | NA       | NA                        | NA       | NA       | 0.79              | 0.62     | 1.01     | -21.58                    | -40.16   | 0.93     |
| ruxolitinib                                                                                 | standard care/placebo                     | 0.88             | 0.22     | 2.98     | -12.27                    | -88.26   | 165.36   | NA                 | NA       | NA       | NA                        | NA       | NA       | 0.87              | 0.36     | 2.04     | -7.58                     | -70.82   | 94.05    |
| tofacitinib                                                                                 | standard care/placebo                     | 0.51             | 0.11     | 2.27     | -53.30                    | -101.21  | 113.59   | NA                 | NA       | NA       | NA                        | NA       | NA       | 0.50              | 0.17     | 1.37     | -48.37                    | -94.21   | 35.12    |
| baricitinib                                                                                 | corticosteroids, IL6 receptor antagonists | NA               | NA       | NA       | NA                        | NA       | NA       | 1.01               | 0.61     | 1.60     | 1.62                      | -38.42   | 44.25    | 1.01              | 0.61     | 1.60     | 1.62                      | -38.42   | 44.25    |
| baricitinib                                                                                 | ruxolitinib                               | NA               | NA       | NA       | NA                        | NA       | NA       | 0.92               | 0.35     | 2.38     | -12.38                    | -118.16  | 63.07    | 0.92              | 0.35     | 2.38     | -12.38                    | -118.16  | 63.07    |
| baricitinib                                                                                 | tofacitinib                               | NA               | NA       | NA       | NA                        | NA       | NA       | 1.59               | 0.53     | 4.96     | 28.40                     | -60.96   | 90.64    | 1.59              | 0.53     | 4.96     | 28.40                     | -60.96   | 90.64    |
| corticosteroids, IL6 receptor antagonists                                                   | ruxolitinib                               | NA               | NA       | NA       | NA                        | NA       | NA       | 0.91               | 0.38     | 2.25     | -14.00                    | -116.88  | 54.31    | 0.91              | 0.38     | 2.25     | -14.00                    | -116.88  | 54.31    |
| corticosteroids, IL6 receptor antagonists                                                   | tofacitinib                               | NA               | NA       | NA       | NA                        | NA       | NA       | 1.57               | 0.56     | 4.69     | 26.79                     | -58.22   | 78.79    | 1.57              | 0.56     | 4.69     | 26.79                     | -58.22   | 78.79    |
| ruxolitinib                                                                                 | tofacitinib                               | NA               | NA       | NA       | NA                        | NA       | NA       | 1.74               | 0.45     | 6.79     | 40.79                     | -64.54   | 153.26   | 1.74              | 0.45     | 6.79     | 40.79                     | -64.54   | 153.26   |
| Mortality – Relative effect estimate: odds ratio; Absolute effect estimate: risk difference |                                           |                  |          |          |                           |          |          |                    |          |          |                           |          |          |                   |          |          |                           |          |          |
| baricitinib                                                                                 | standard care/placebo                     | 0.61             | 0.37     | 0.99     | -46.03                    | -77.06   | -1.46    | NA                 | NA       | NA       | NA                        | NA       | NA       | 0.62              | 0.44     | 0.85     | -44.76                    | -67.97   | -17.39   |
| corticosteroids, IL6 receptor antagonists                                                   | standard care/placebo                     | 0.80             | 0.68     | 0.96     | -22.77                    | -37.64   | -4.86    | NA                 | NA       | NA       | NA                        | NA       | NA       | 0.80              | 0.68     | 0.96     | -22.45                    | -37.16   | -5.28    |
| ruxolitinib                                                                                 | standard care/placebo                     | 0.93             | 0.18     | 4.37     | -7.76                     | -103.20  | 264.99   | NA                 | NA       | NA       | NA                        | NA       | NA       | 0.87              | 0.28     | 2.85     | 1.42                      | -87.46   | 173.87   |
| tofacitinib                                                                                 | standard care/placebo                     | 0.49             | 0.09     | 2.69     | -61.87                    | -116.90  | 157.01   | NA                 | NA       | NA       | NA                        | NA       | NA       | 0.47              | 0.11     | 1.63     | -52.36                    | -112.81  | 69.09    |
| baricitinib                                                                                 | corticosteroids, IL6 receptor antagonists | NA               | NA       | NA       | NA                        | NA       | NA       | 0.77               | 0.53     | 1.10     | -22.31                    | -51.64   | 8.51     | 0.77              | 0.53     | 1.10     | -22.31                    | -51.64   | 8.51     |

| Intervention 1                                                                                                   | Intervention 2                            | DIRECT ESTIMATES |          |          |                           |          |          | INDIRECT ESTIMATES |          |          |                           |          |          | NETWORK ESTIMATES |          |          |                           |          |          |
|------------------------------------------------------------------------------------------------------------------|-------------------------------------------|------------------|----------|----------|---------------------------|----------|----------|--------------------|----------|----------|---------------------------|----------|----------|-------------------|----------|----------|---------------------------|----------|----------|
|                                                                                                                  |                                           | Relative effect  |          |          | Absolute effect per 1,000 |          |          | Relative effect    |          |          | Absolute effect per 1,000 |          |          | Relative effect   |          |          | Absolute effect per 1,000 |          |          |
|                                                                                                                  |                                           | Point estimate   | Lower CI | Upper CI | Point estimate            | Lower CI | Upper CI | Point estimate     | Lower CI | Upper CI | Point estimate            | Lower CI | Upper CI | Point estimate    | Lower CI | Upper CI | Point estimate            | Lower CI | Upper CI |
| baricitinib                                                                                                      | ruxolitinib                               | NA               | NA       | NA       | NA                        | NA       | NA       | 0.71               | 0.21     | 2.27     | -46.17                    | -220.42  | 48.77    | 0.71              | 0.21     | 2.27     | -46.17                    | -220.42  | 48.77    |
| baricitinib                                                                                                      | tofacitinib                               | NA               | NA       | NA       | NA                        | NA       | NA       | 1.32               | 0.36     | 5.92     | 7.60                      | -115.20  | 75.53    | 1.32              | 0.36     | 5.92     | 7.60                      | -115.20  | 75.53    |
| corticosteroids, IL6 receptor antagonists                                                                        | ruxolitinib                               | NA               | NA       | NA       | NA                        | NA       | NA       | 0.92               | 0.28     | 2.87     | -23.86                    | -196.23  | 67.78    | 0.92              | 0.28     | 2.87     | -23.86                    | -196.23  | 67.78    |
| corticosteroids, IL6 receptor antagonists                                                                        | tofacitinib                               | NA               | NA       | NA       | NA                        | NA       | NA       | 1.73               | 0.49     | 7.53     | 29.92                     | -92.18   | 93.44    | 1.73              | 0.49     | 7.53     | 29.92                     | -92.18   | 93.44    |
| ruxolitinib                                                                                                      | tofacitinib                               | NA               | NA       | NA       | NA                        | NA       | NA       | 1.90               | 0.34     | 12.12    | 53.78                     | -99.88   | 237.55   | 1.90              | 0.34     | 12.12    | 53.78                     | -99.88   | 237.55   |
| Time to symptom resolution – Relative effect estimate: ratio of means; Absolute effect estimate: mean difference |                                           |                  |          |          |                           |          |          |                    |          |          |                           |          |          |                   |          |          |                           |          |          |
| baricitinib                                                                                                      | standard care/placebo                     | 0.89             | 0.52     | 1.54     | -1.07                     | -4.83    | 5.40     | NA                 | NA       | NA       | NA                        | NA       | NA       | 0.90              | 0.72     | 1.11     | -1.00                     | -2.85    | 1.13     |
| corticosteroids, IL6 receptor antagonists                                                                        | standard care/placebo                     | 0.85             | 0.63     | 1.17     | -1.48                     | -3.74    | 1.73     | NA                 | NA       | NA       | NA                        | NA       | NA       | 0.85              | 0.68     | 1.06     | -1.45                     | -3.15    | 0.60     |
| ruxolitinib                                                                                                      | standard care/placebo                     | 0.98             | 0.54     | 1.76     | -0.22                     | -4.57    | 7.60     | NA                 | NA       | NA       | NA                        | NA       | NA       | 0.98              | 0.75     | 1.28     | -0.11                     | -2.50    | 2.82     |
| baricitinib                                                                                                      | corticosteroids, IL6 receptor antagonists | NA               | NA       | NA       | NA                        | NA       | NA       | 1.06               | 0.77     | 1.43     | 0.45                      | -2.32    | 3.17     | 1.06              | 0.77     | 1.43     | 0.45                      | -2.32    | 3.17     |
| baricitinib                                                                                                      | ruxolitinib                               | NA               | NA       | NA       | NA                        | NA       | NA       | 0.92               | 0.64     | 1.29     | -0.89                     | -4.34    | 2.29     | 0.92              | 0.64     | 1.29     | -0.89                     | -4.34    | 2.29     |
| corticosteroids, IL6 receptor antagonists                                                                        | ruxolitinib                               | NA               | NA       | NA       | NA                        | NA       | NA       | 0.87               | 0.62     | 1.23     | -1.35                     | -4.73    | 1.82     | 0.87              | 0.62     | 1.23     | -1.35                     | -4.73    | 1.82     |
| Ventilator-free days – Relative effect estimate: NA; Absolute effect estimate: mean difference                   |                                           |                  |          |          |                           |          |          |                    |          |          |                           |          |          |                   |          |          |                           |          |          |
| baricitinib                                                                                                      | standard care/placebo                     | NA               | NA       | NA       | 1.01                      | -0.39    | 2.48     | NA                 | NA       | NA       | NA                        | NA       | NA       | NA                | NA       | NA       | 0.99                      | -0.28    | 2.42     |
| corticosteroids, IL6 receptor antagonists                                                                        | standard care/placebo                     | NA               | NA       | NA       | 1.46                      | -0.06    | 2.98     | NA                 | NA       | NA       | NA                        | NA       | NA       | NA                | NA       | NA       | 1.50                      | -0.01    | 3.00     |
| baricitinib                                                                                                      | corticosteroids, IL6 receptor antagonists | NA               | NA       | NA       | NA                        | NA       | NA       | NA                 | NA       | NA       | -0.52                     | -2.47    | 1.61     | NA                | NA       | NA       | -0.52                     | -2.47    | 1.61     |

1. Siemieniuk RA, Bartoszko JJ, Ge L, et al. Drug treatments for covid-19: living systematic review and network meta-analysis. *Bmj* 2020;370:m2980. doi: 10.1136/bmj.m2980 [published Online First: 2020/08/01]

Relative safety and efficacy of selected drugs for treatment of non-severe covid-19

## Supplementary Materials

Relative safety and efficacy of fluvoxamine, inhaled corticosteroids, molnupiravir, nirmatrelvir/ritonavir, remdesivir, sotrovimab, and standard care/placebo

### Table of Contents

---

|                                                                                     |           |
|-------------------------------------------------------------------------------------|-----------|
| <b>Figure 1 . Network plot: Admission to hospital. ....</b>                         | <b>2</b>  |
| <b>Figure 2 . Network plot: Adverse events leading to discontinuation.....</b>      | <b>2</b>  |
| <b>Figure 3 . Network plot: Mechanical ventilation. ....</b>                        | <b>3</b>  |
| <b>Figure 4 . Network plot: Mortality.....</b>                                      | <b>3</b>  |
| <b>Figure 5. Network plot: Time to symptom resolution.....</b>                      | <b>4</b>  |
| <b>Figures 6-11. Forest plots: Admission to hospital.....</b>                       | <b>5</b>  |
| <b>Figures 12-16. Forest plots: Adverse events leading to discontinuation. ....</b> | <b>8</b>  |
| <b>Figures 17-21. Forest plot: Mechanical ventilation. ....</b>                     | <b>11</b> |
| <b>Figures 22-27. Forest plot: Mortality.....</b>                                   | <b>14</b> |
| <b>Figures 28-30. Forest plot: Time to symptom resolution.....</b>                  | <b>17</b> |
| <b>Table 1. Direct, indirect and network estimates.....</b>                         | <b>18</b> |

Network Plots

Figure 1 . Network plot: Admission to hospital.

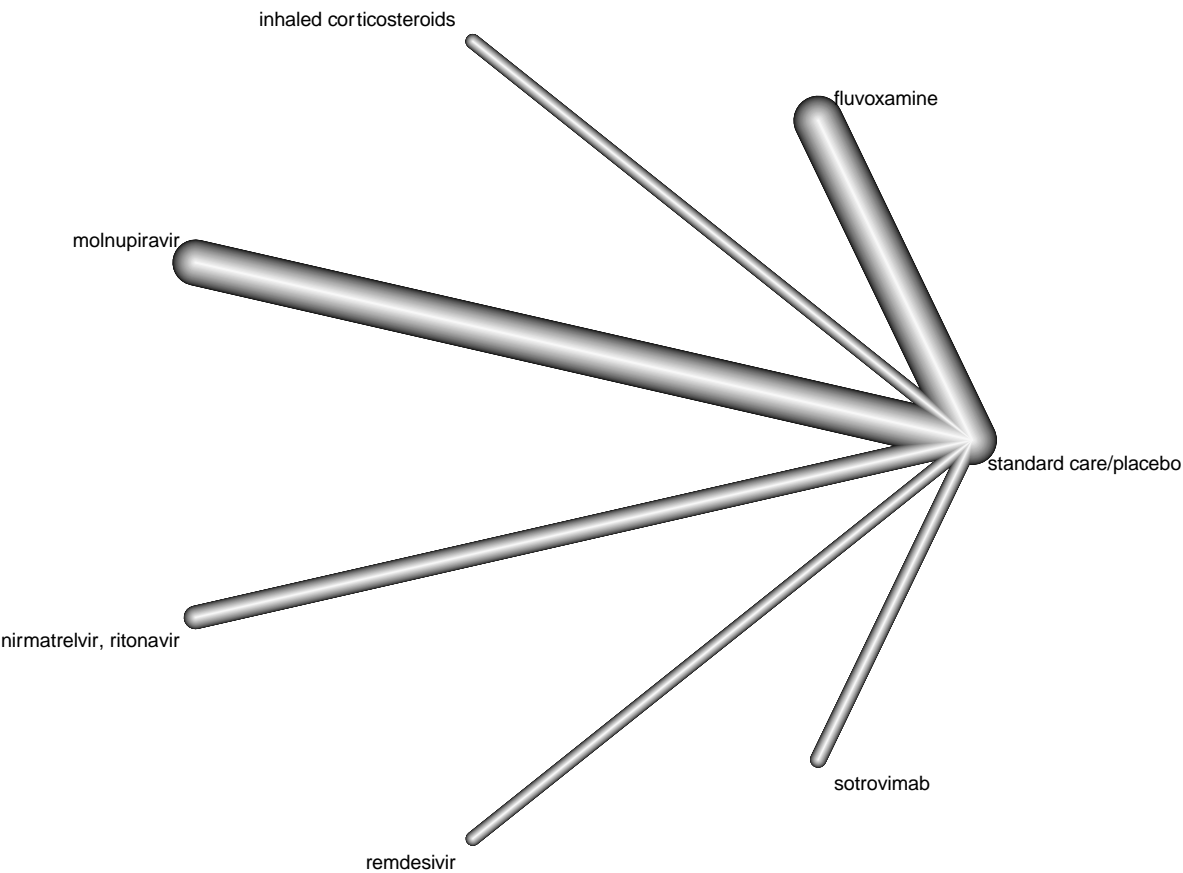

Figure 2 . Network plot: Adverse events leading to discontinuation.

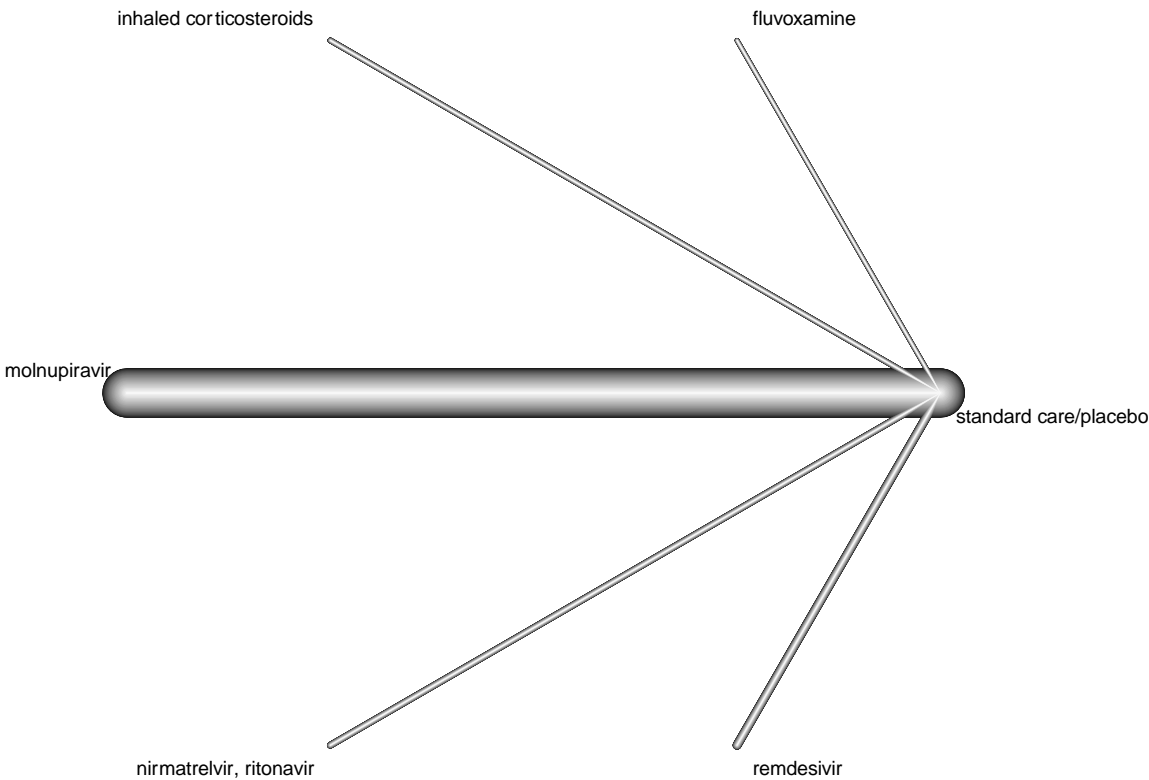

Figure 3 . Network plot: Mechanical ventilation.

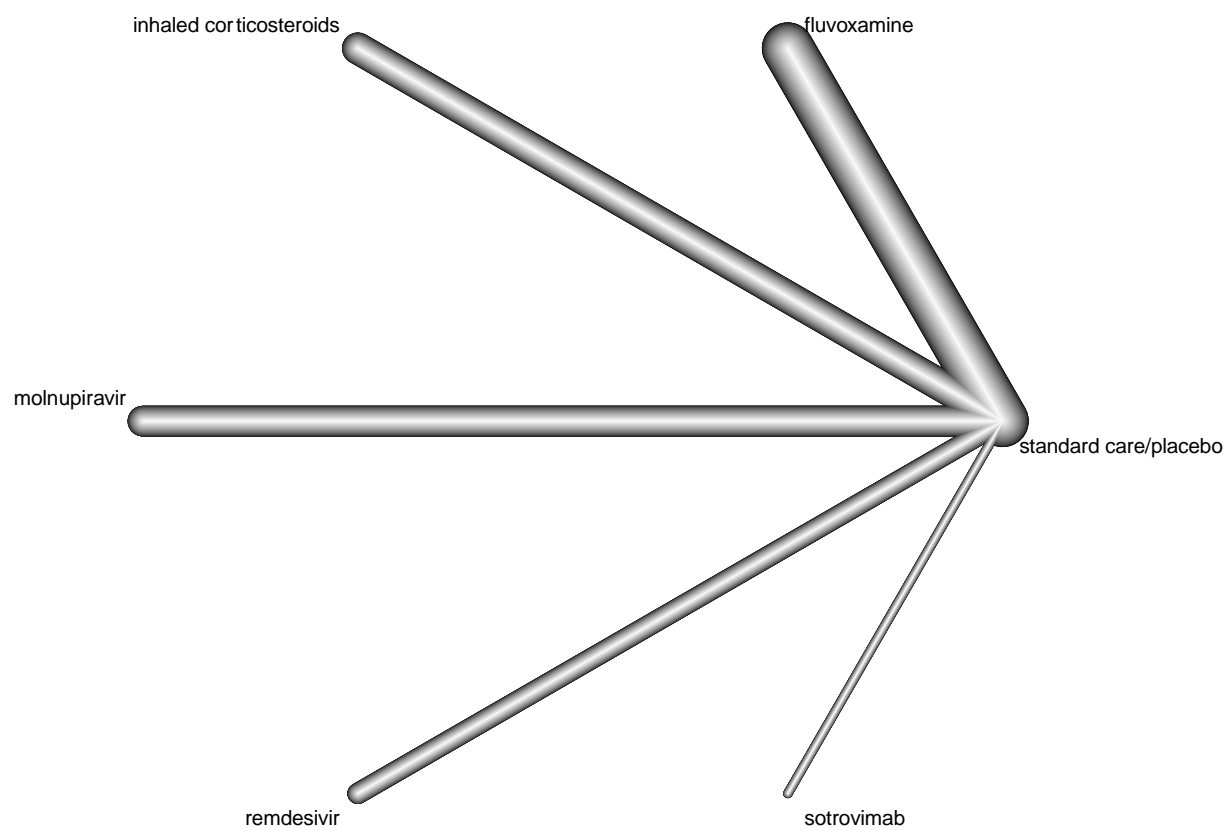

Figure 4 . Network plot: Mortality.

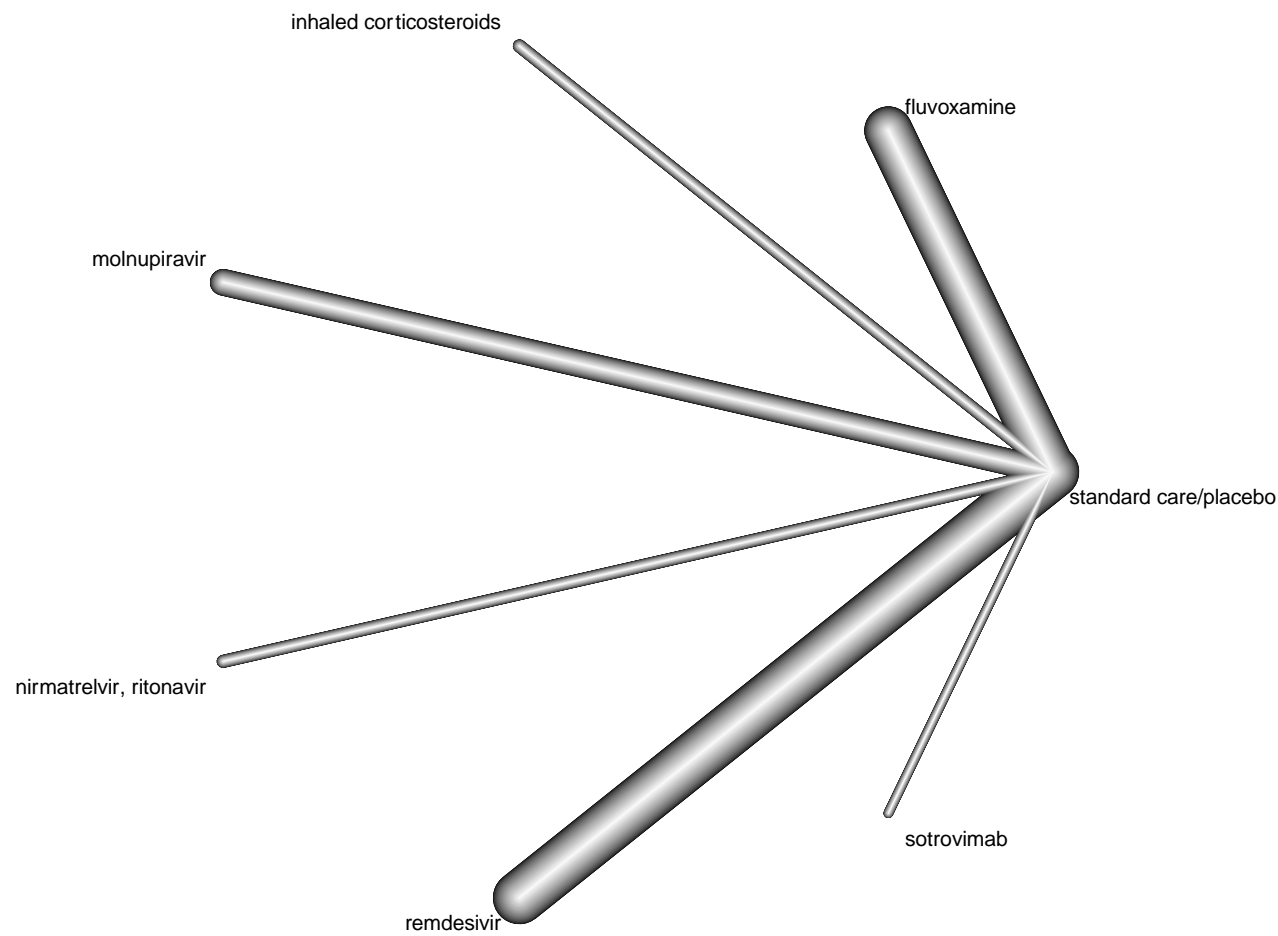

Figure 5. Network plot: Time to symptom resolution.

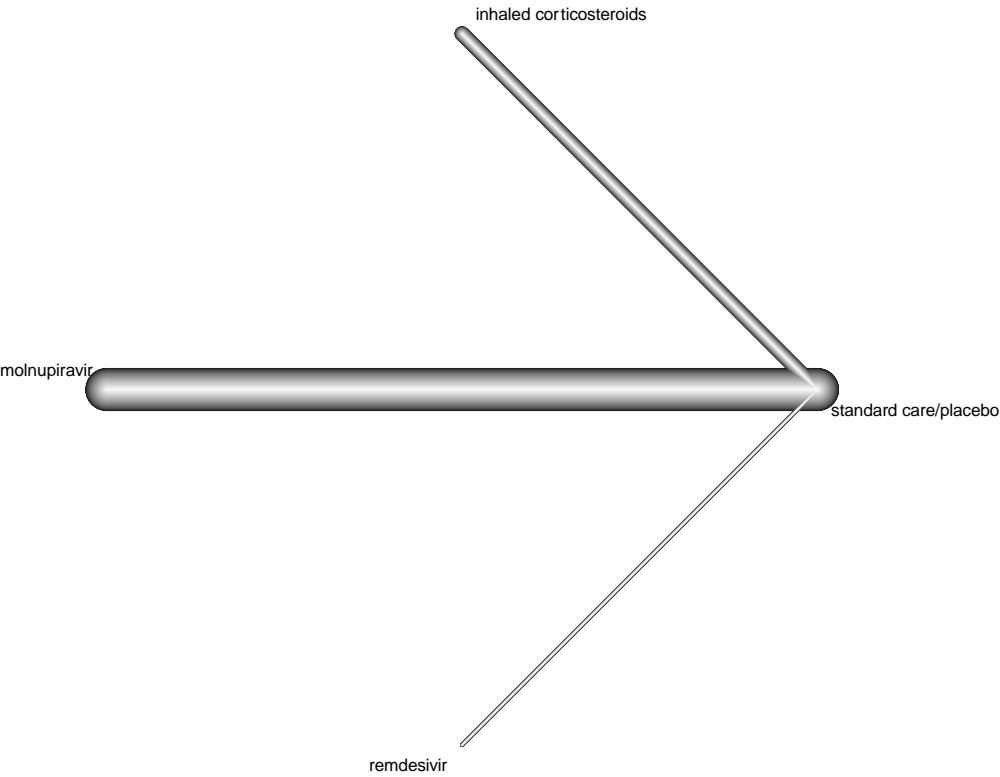

Figures 6-11. Forest plots: Admission to hospital.

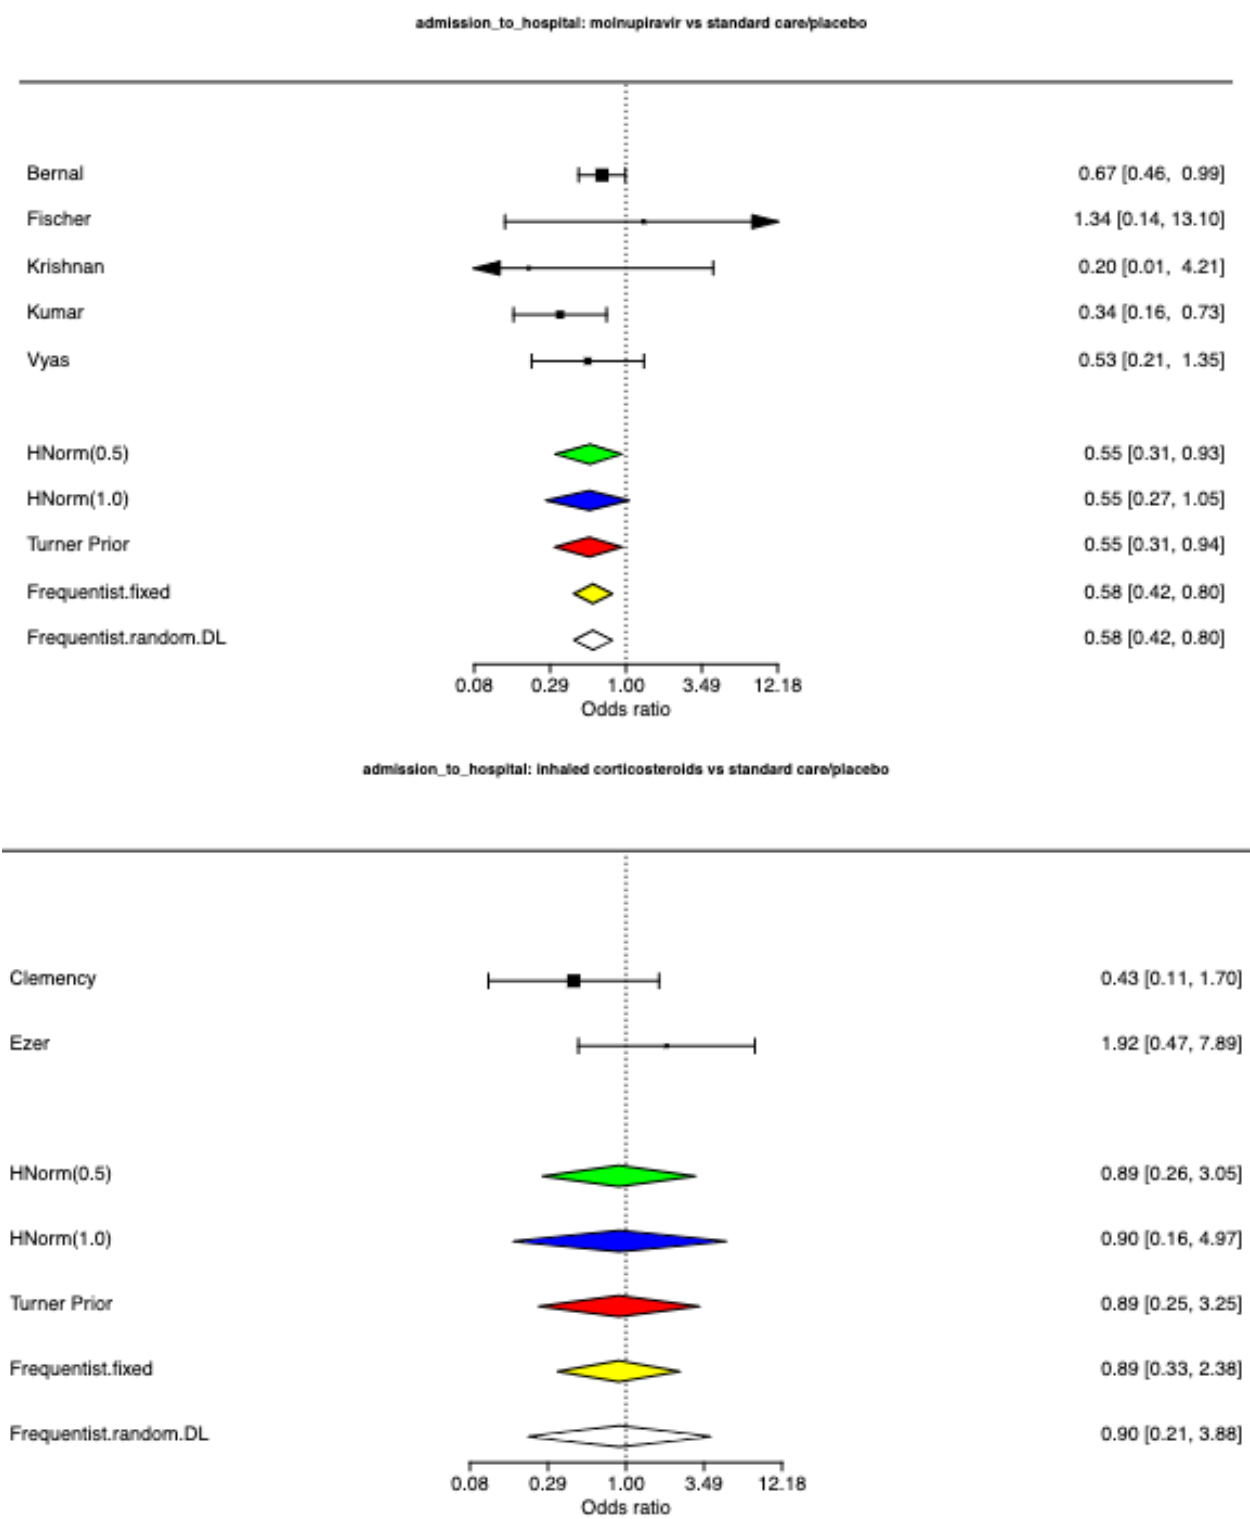

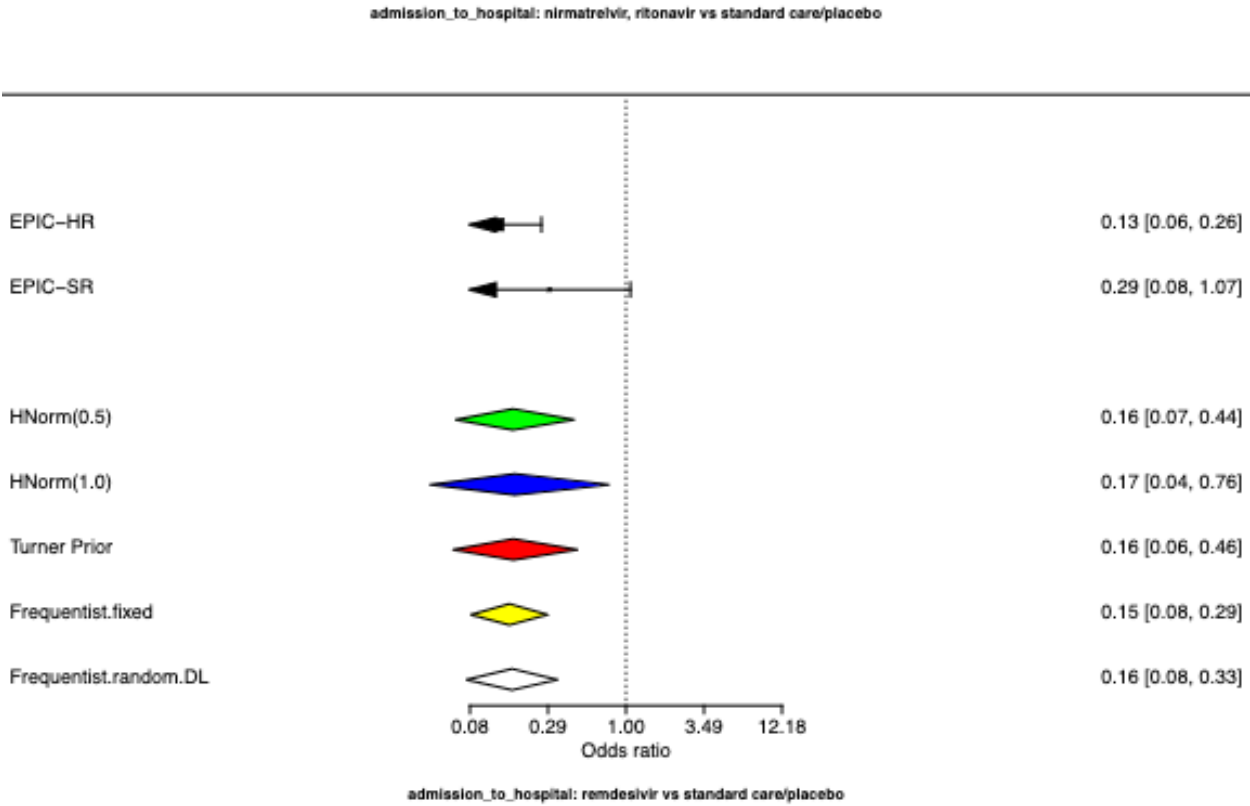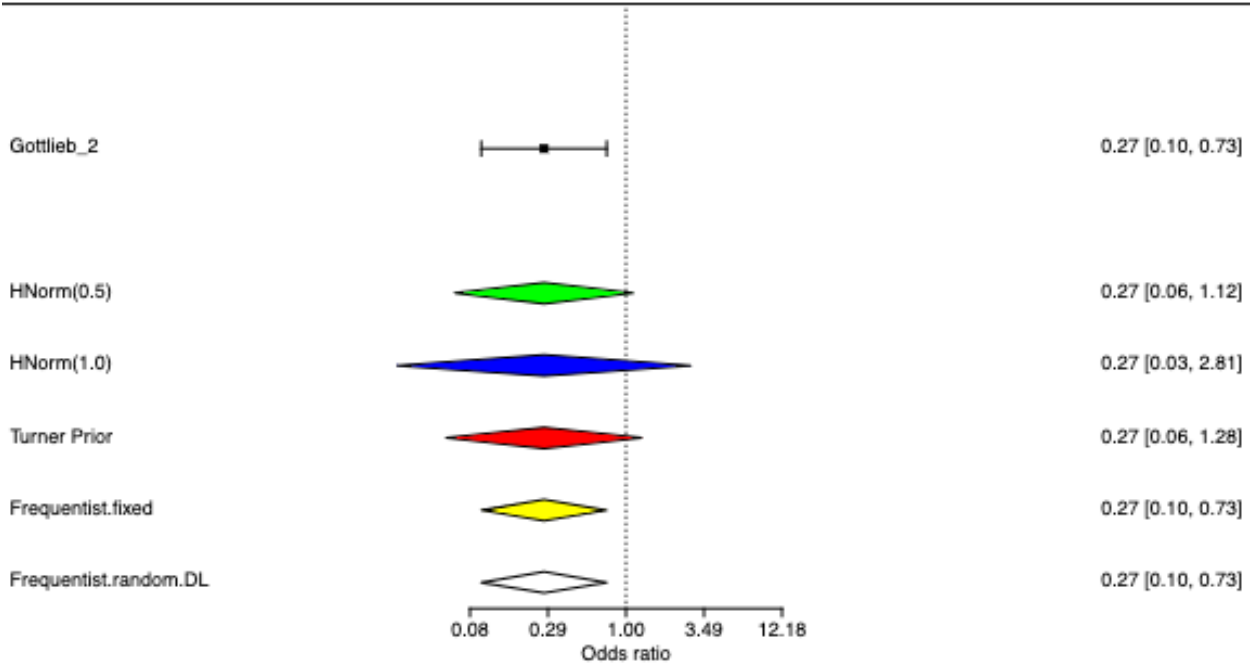

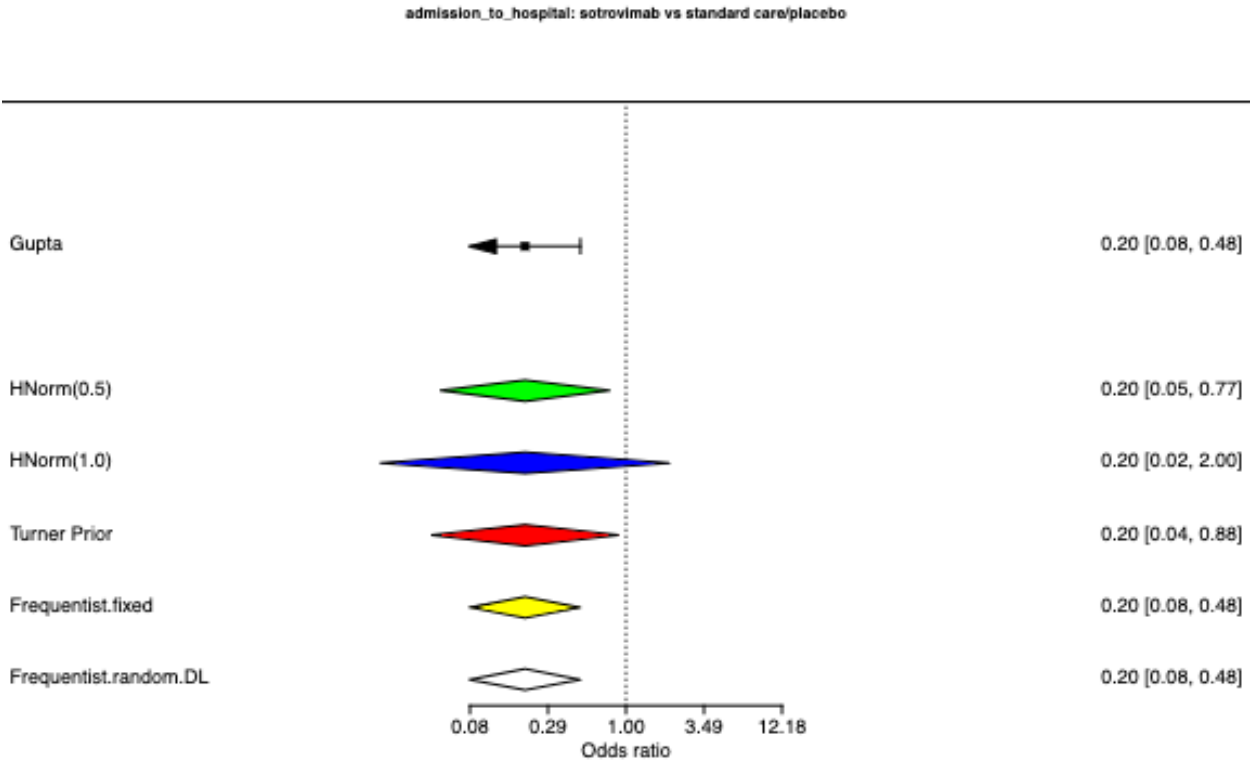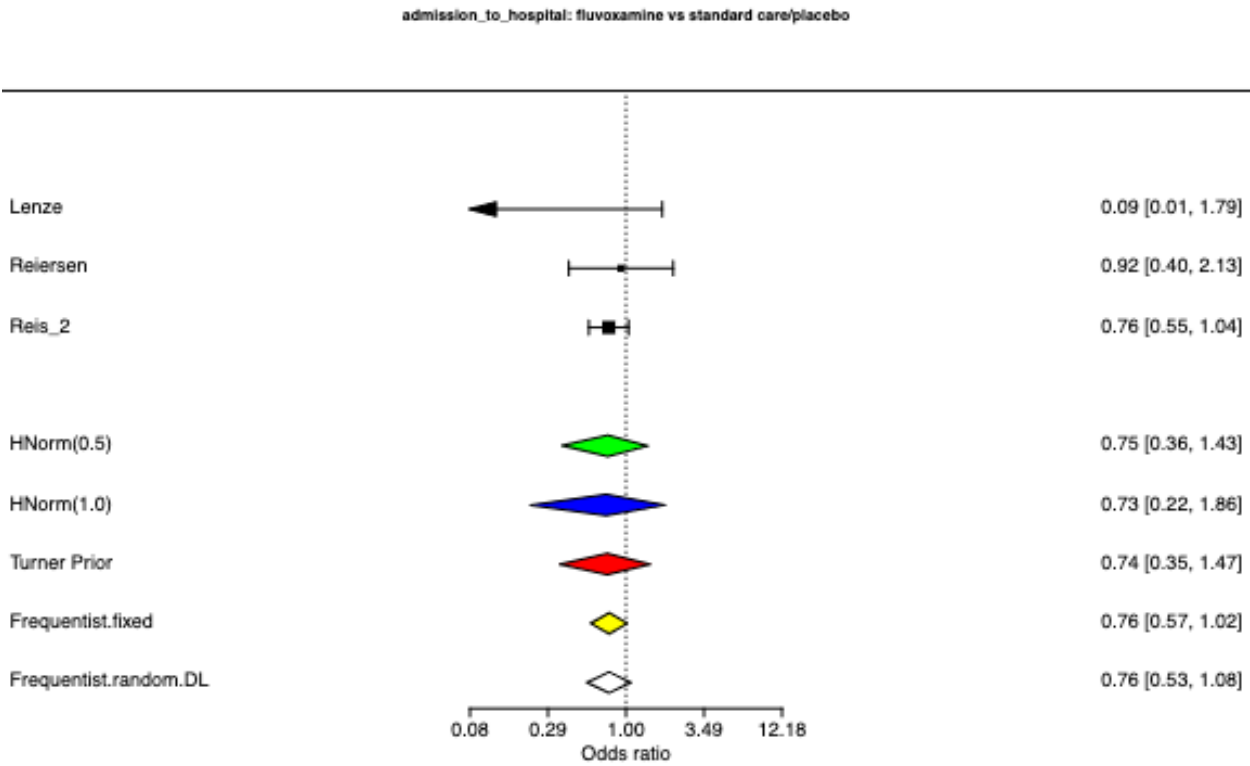

Figures 12-16. Forest plots: Adverse events leading to discontinuation.

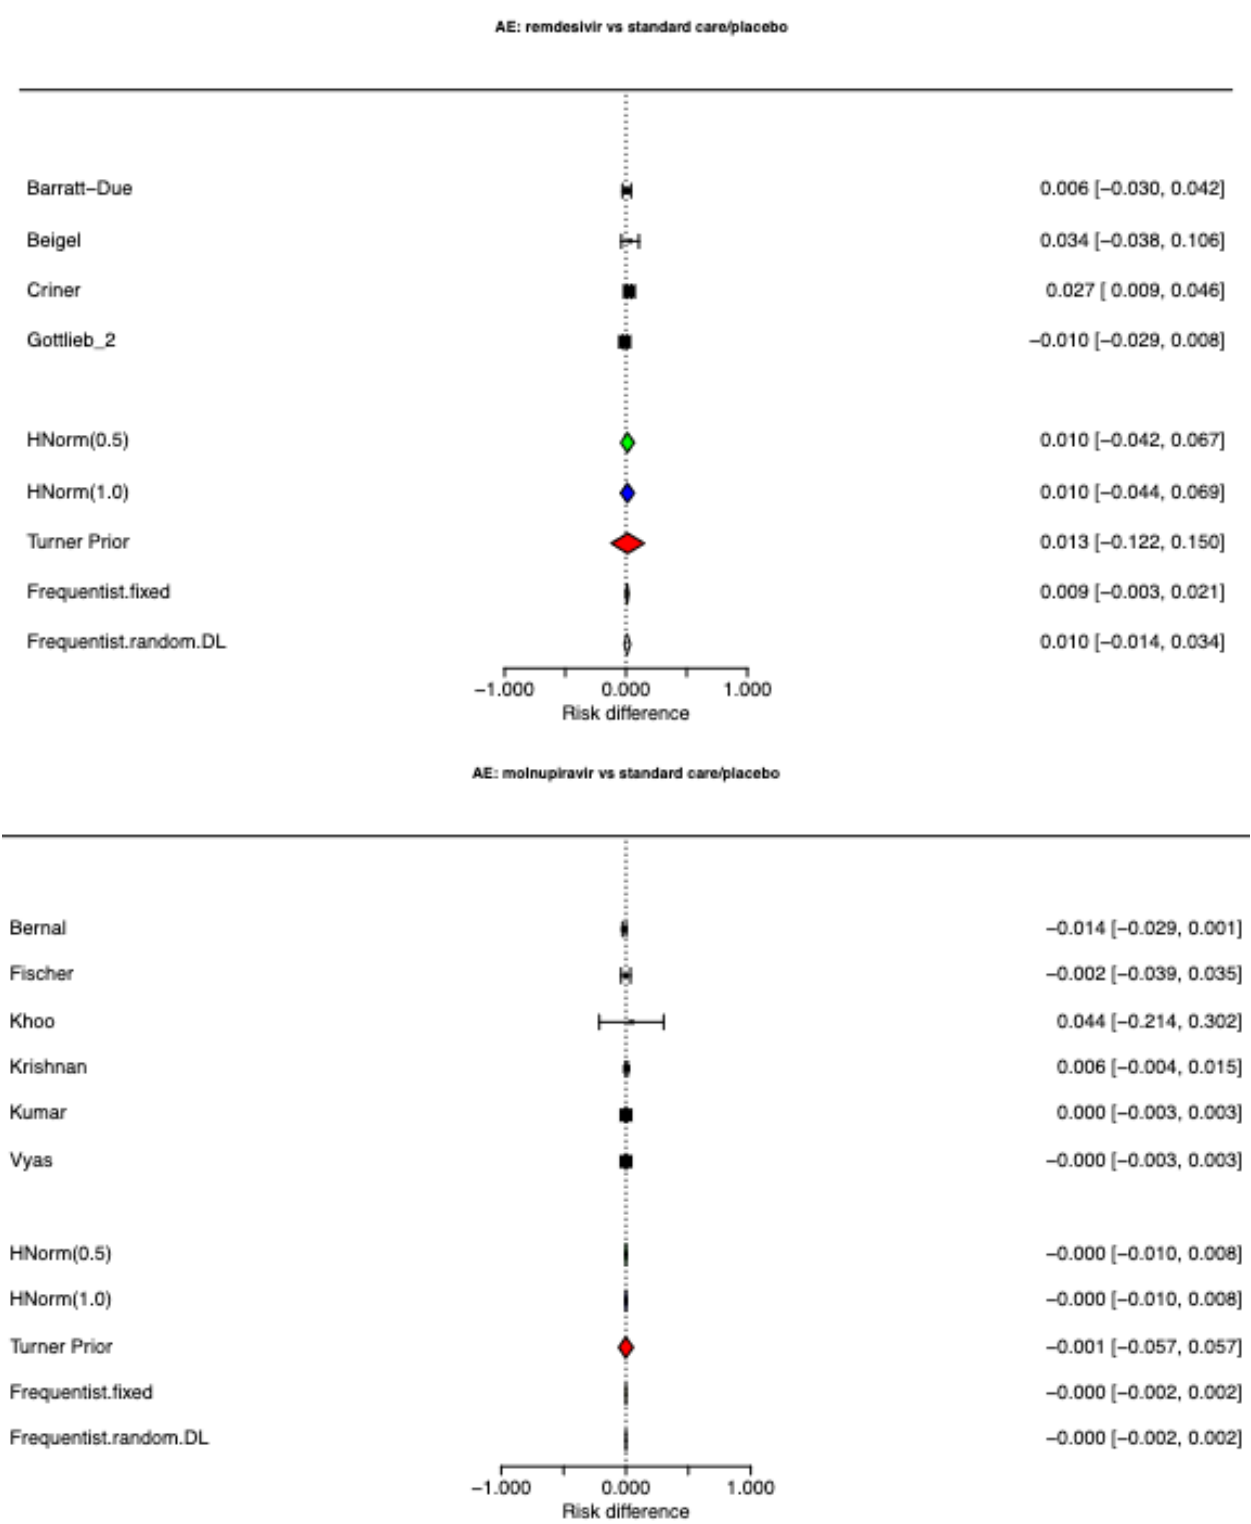

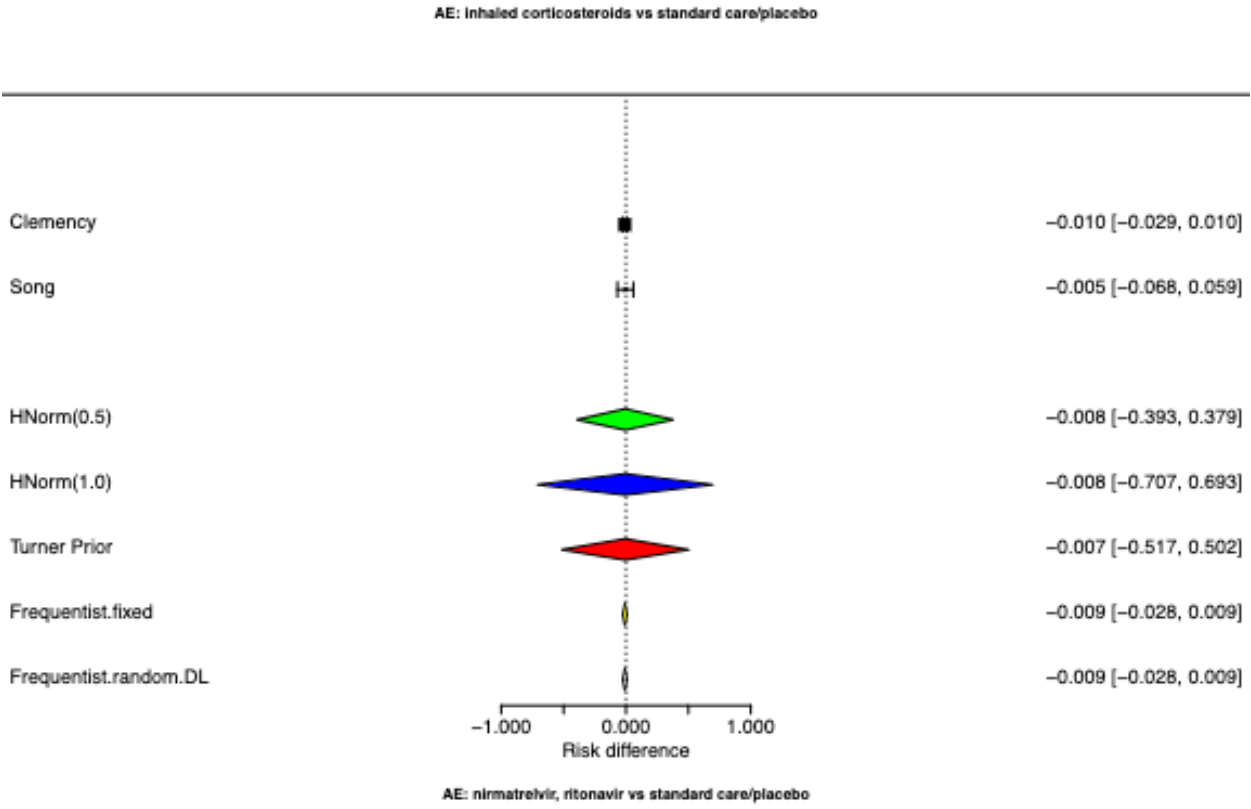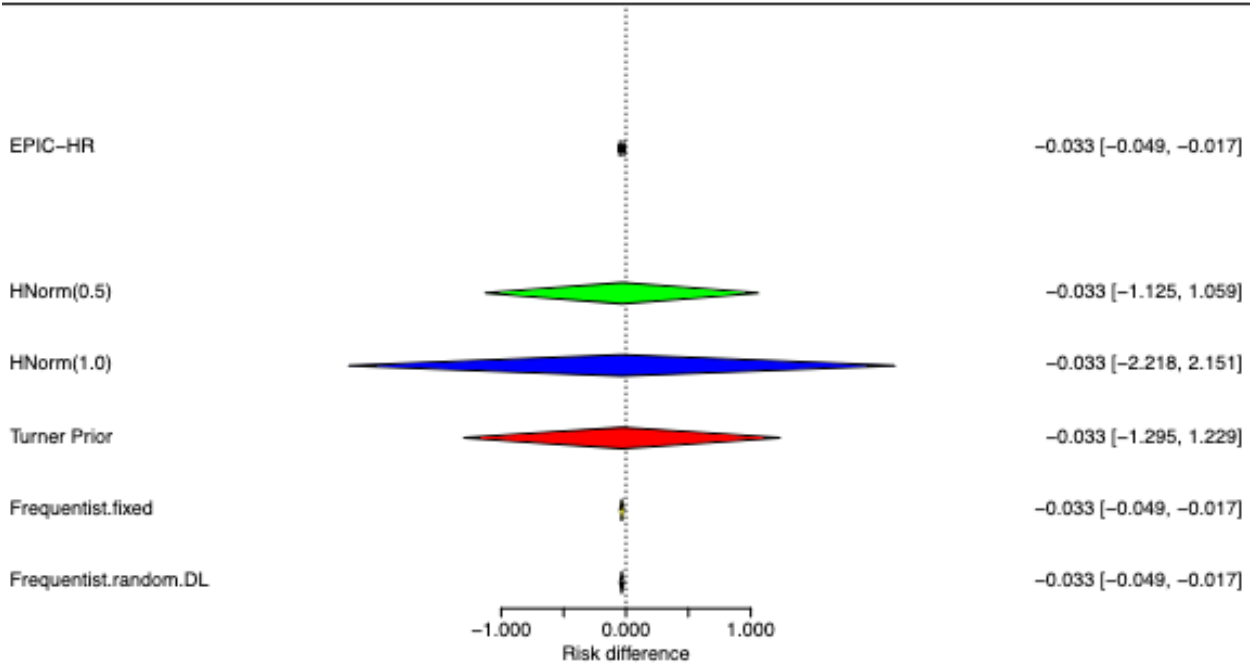

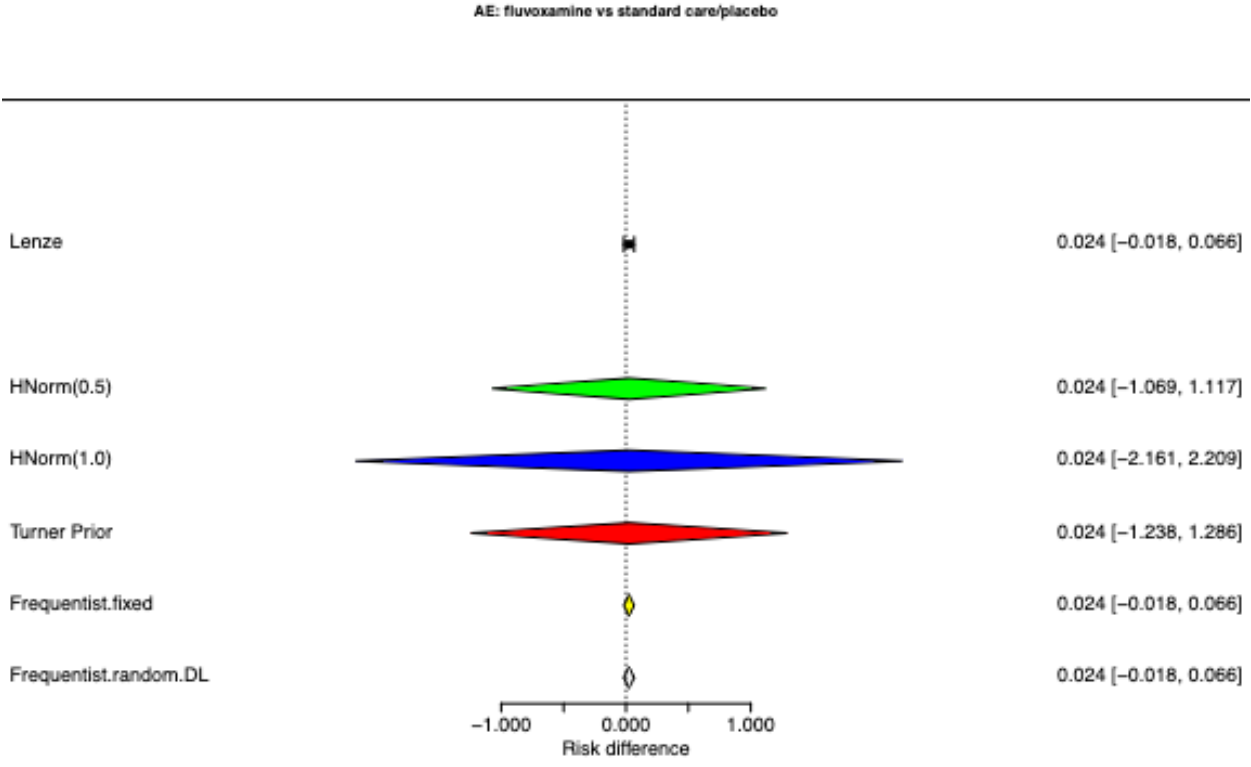

Figures 17-21. Forest plot: Mechanical ventilation.

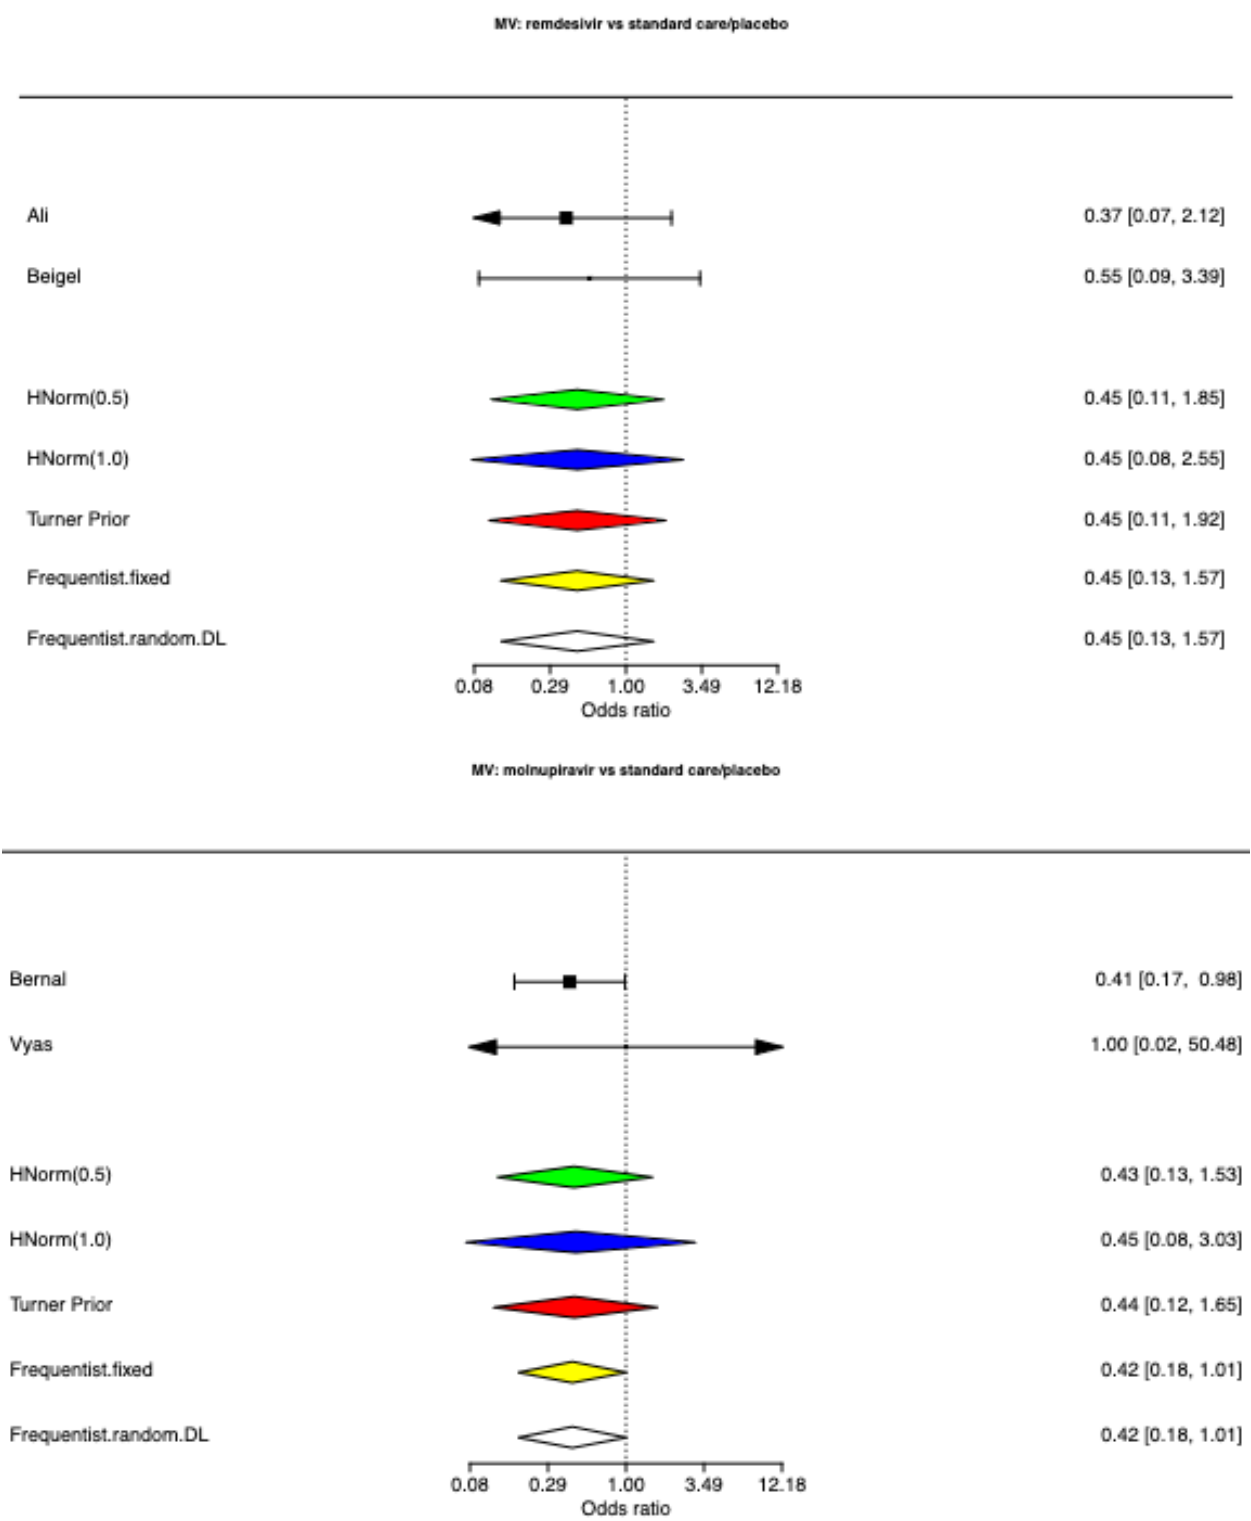

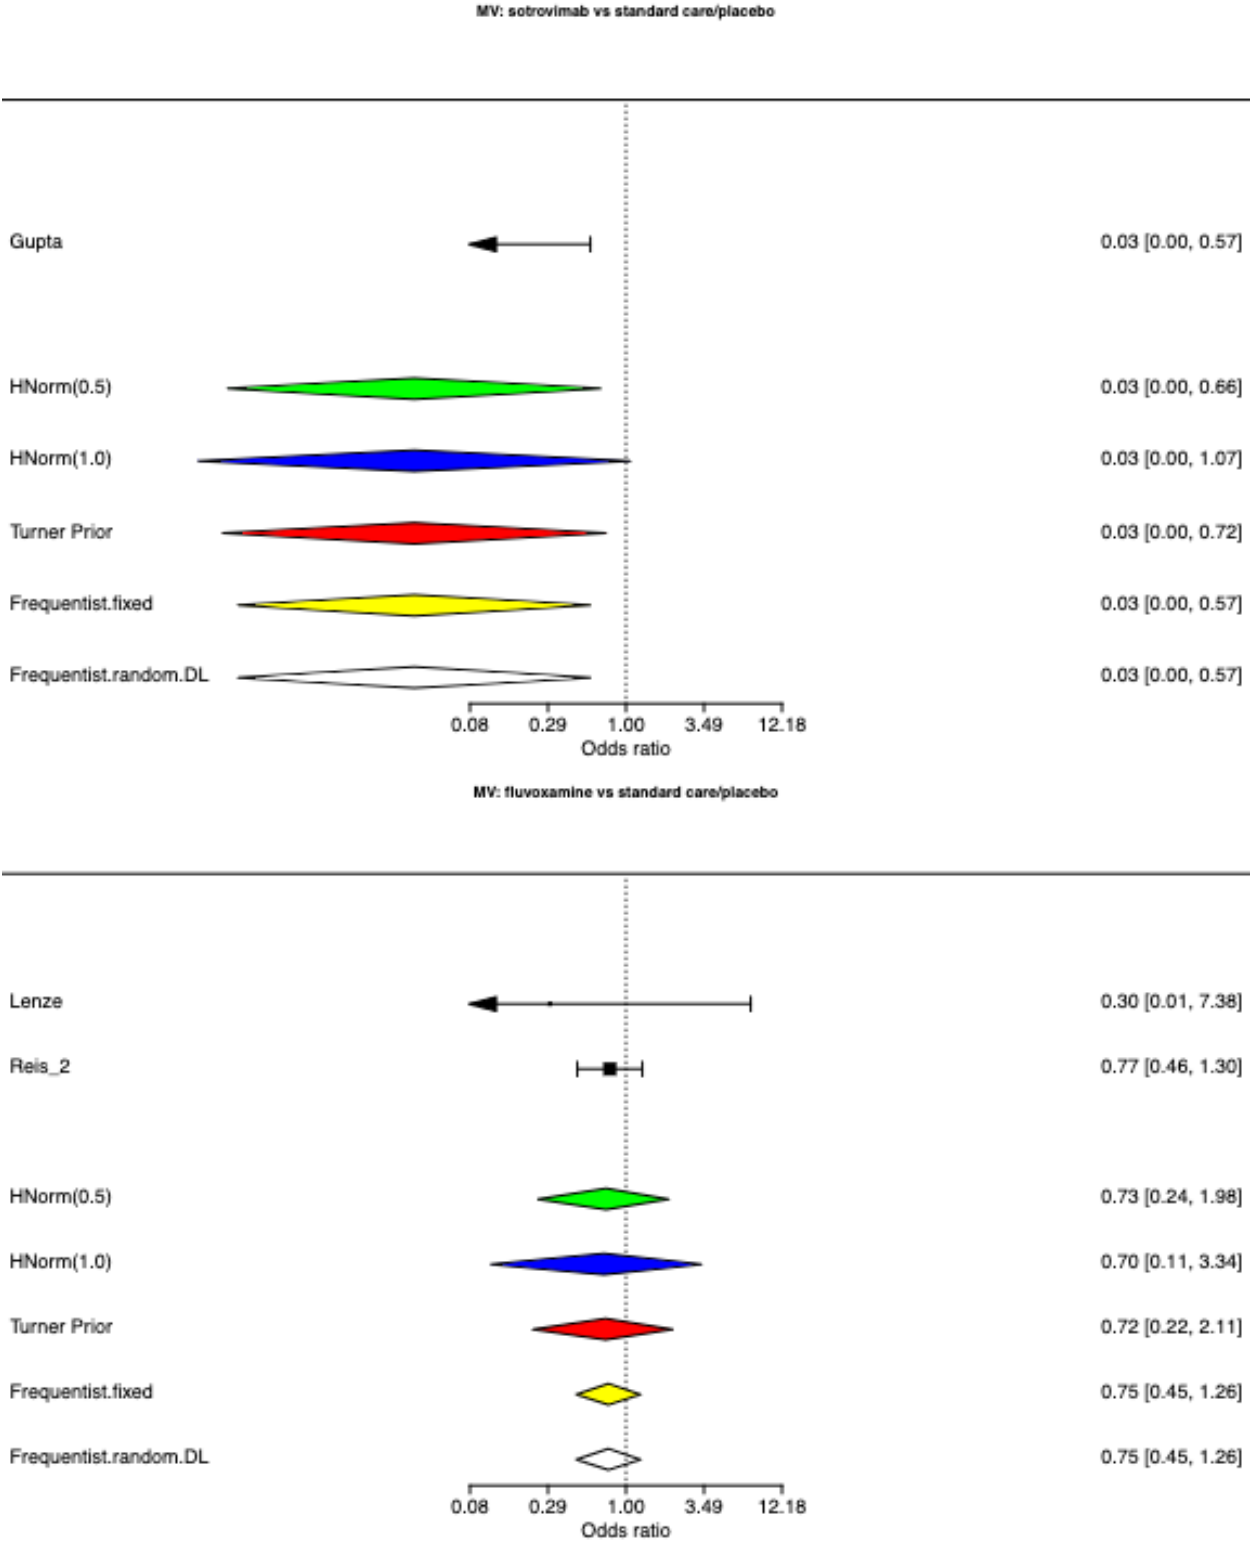

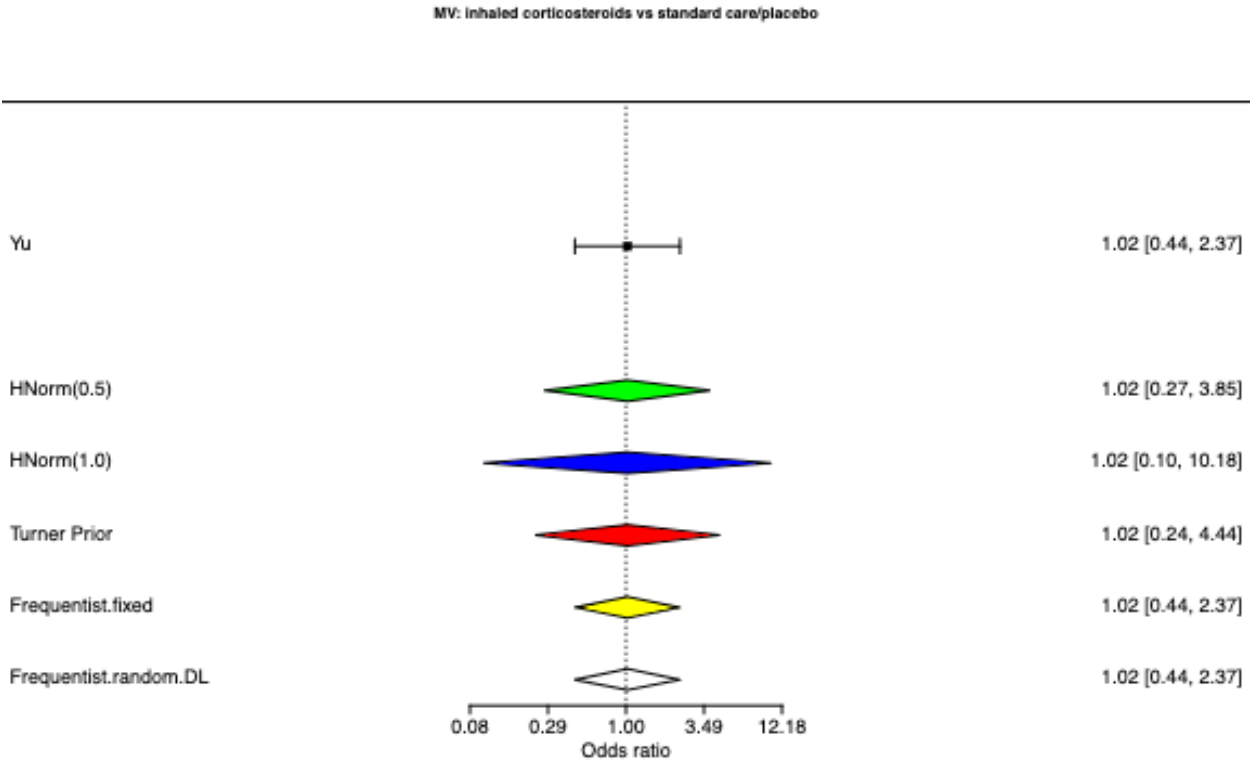

Figures 22-27. Forest plot: Mortality.

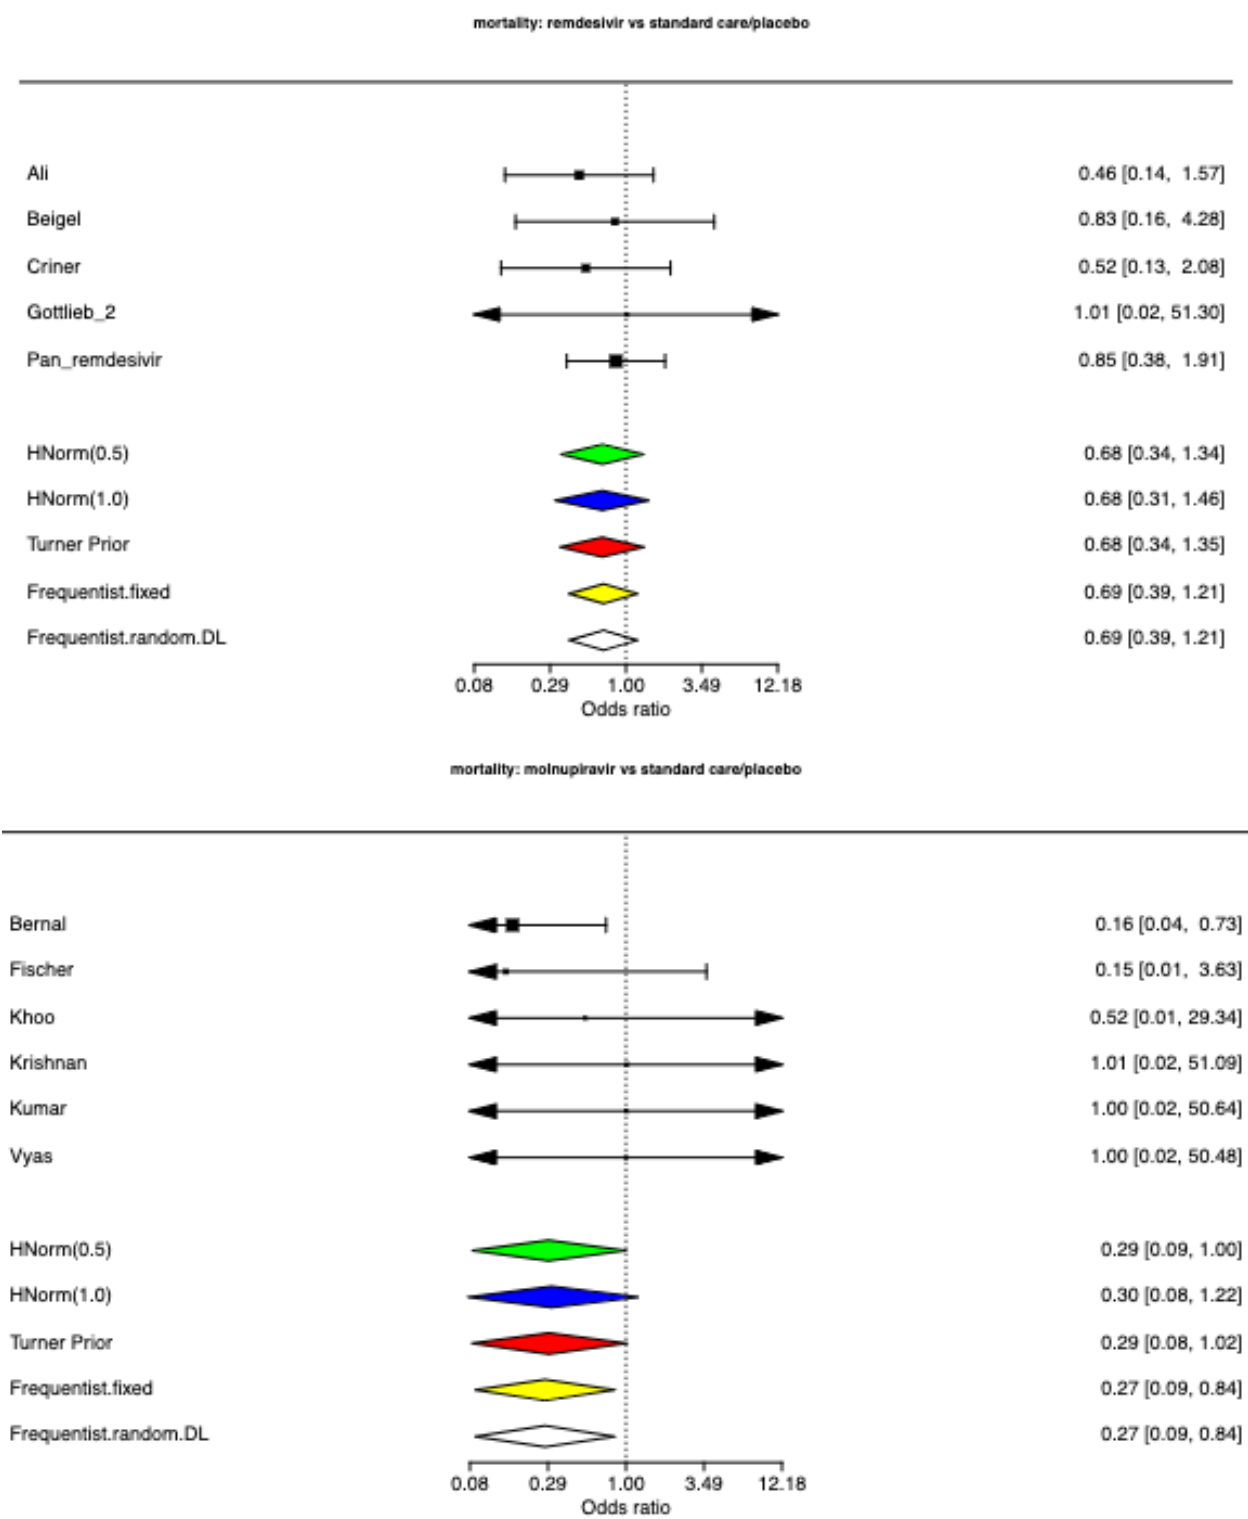

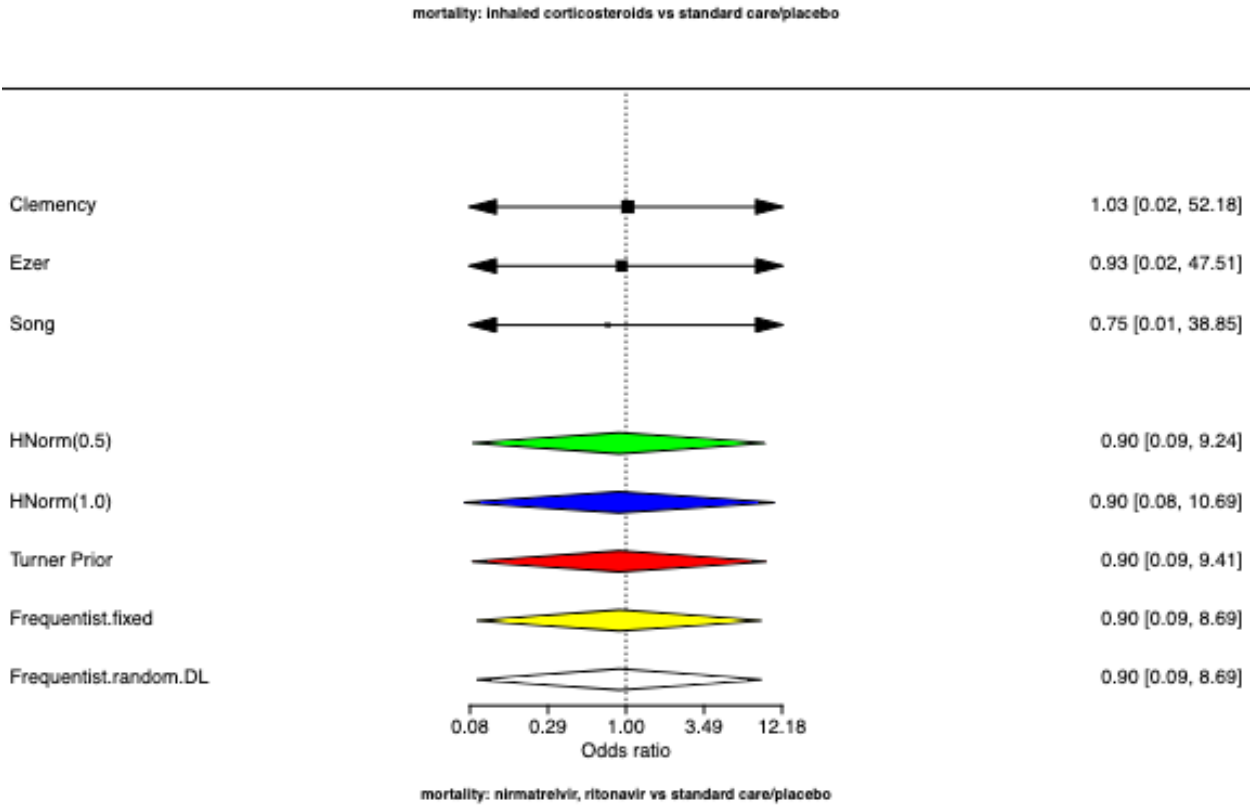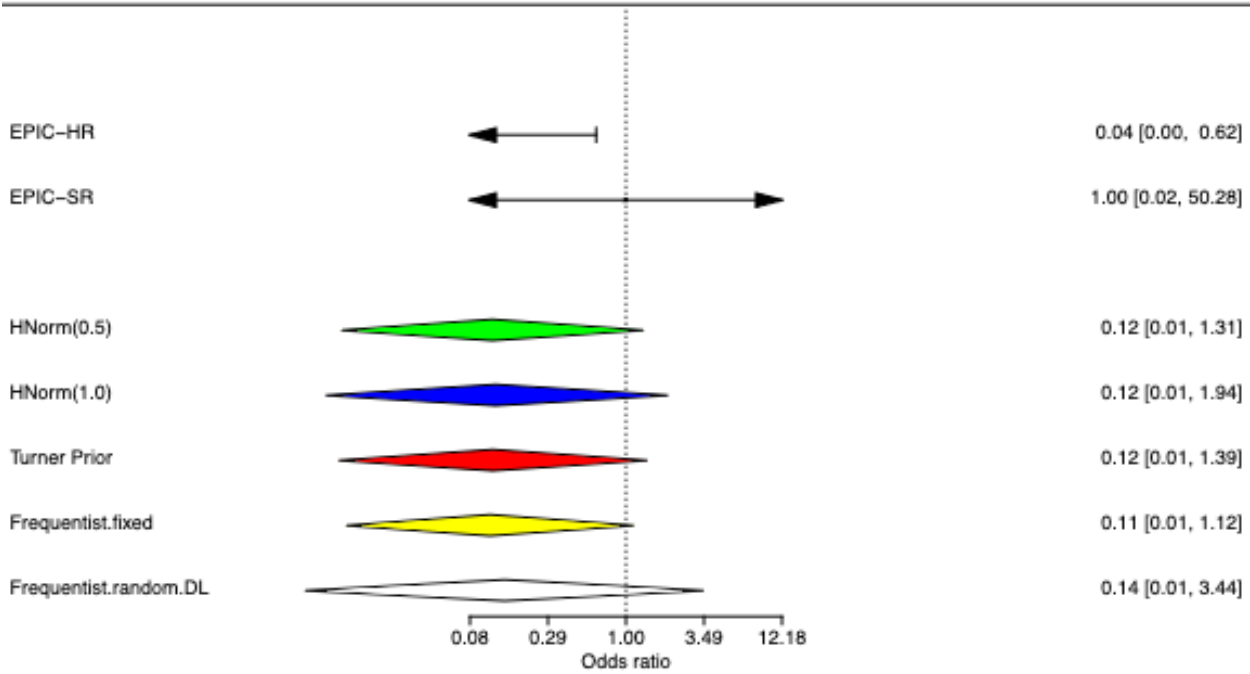

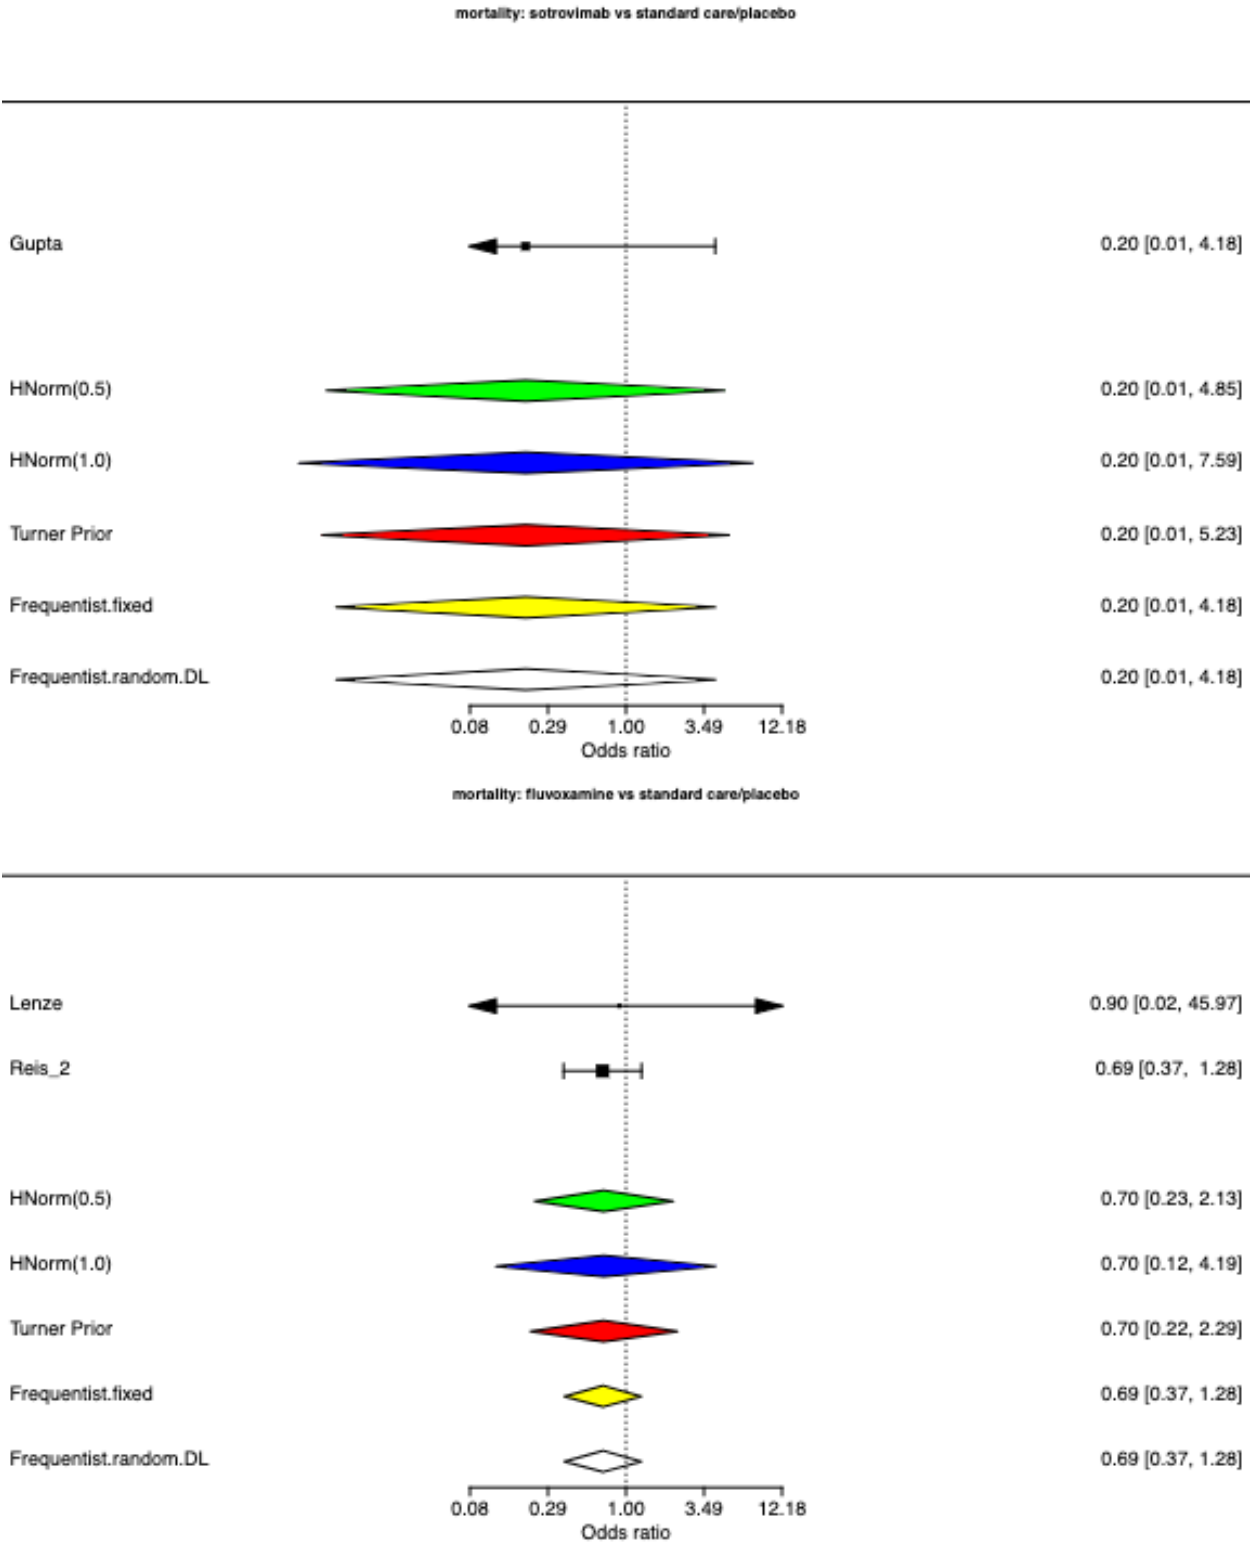

Figures 28-30. Forest plot: Time to symptom resolution.

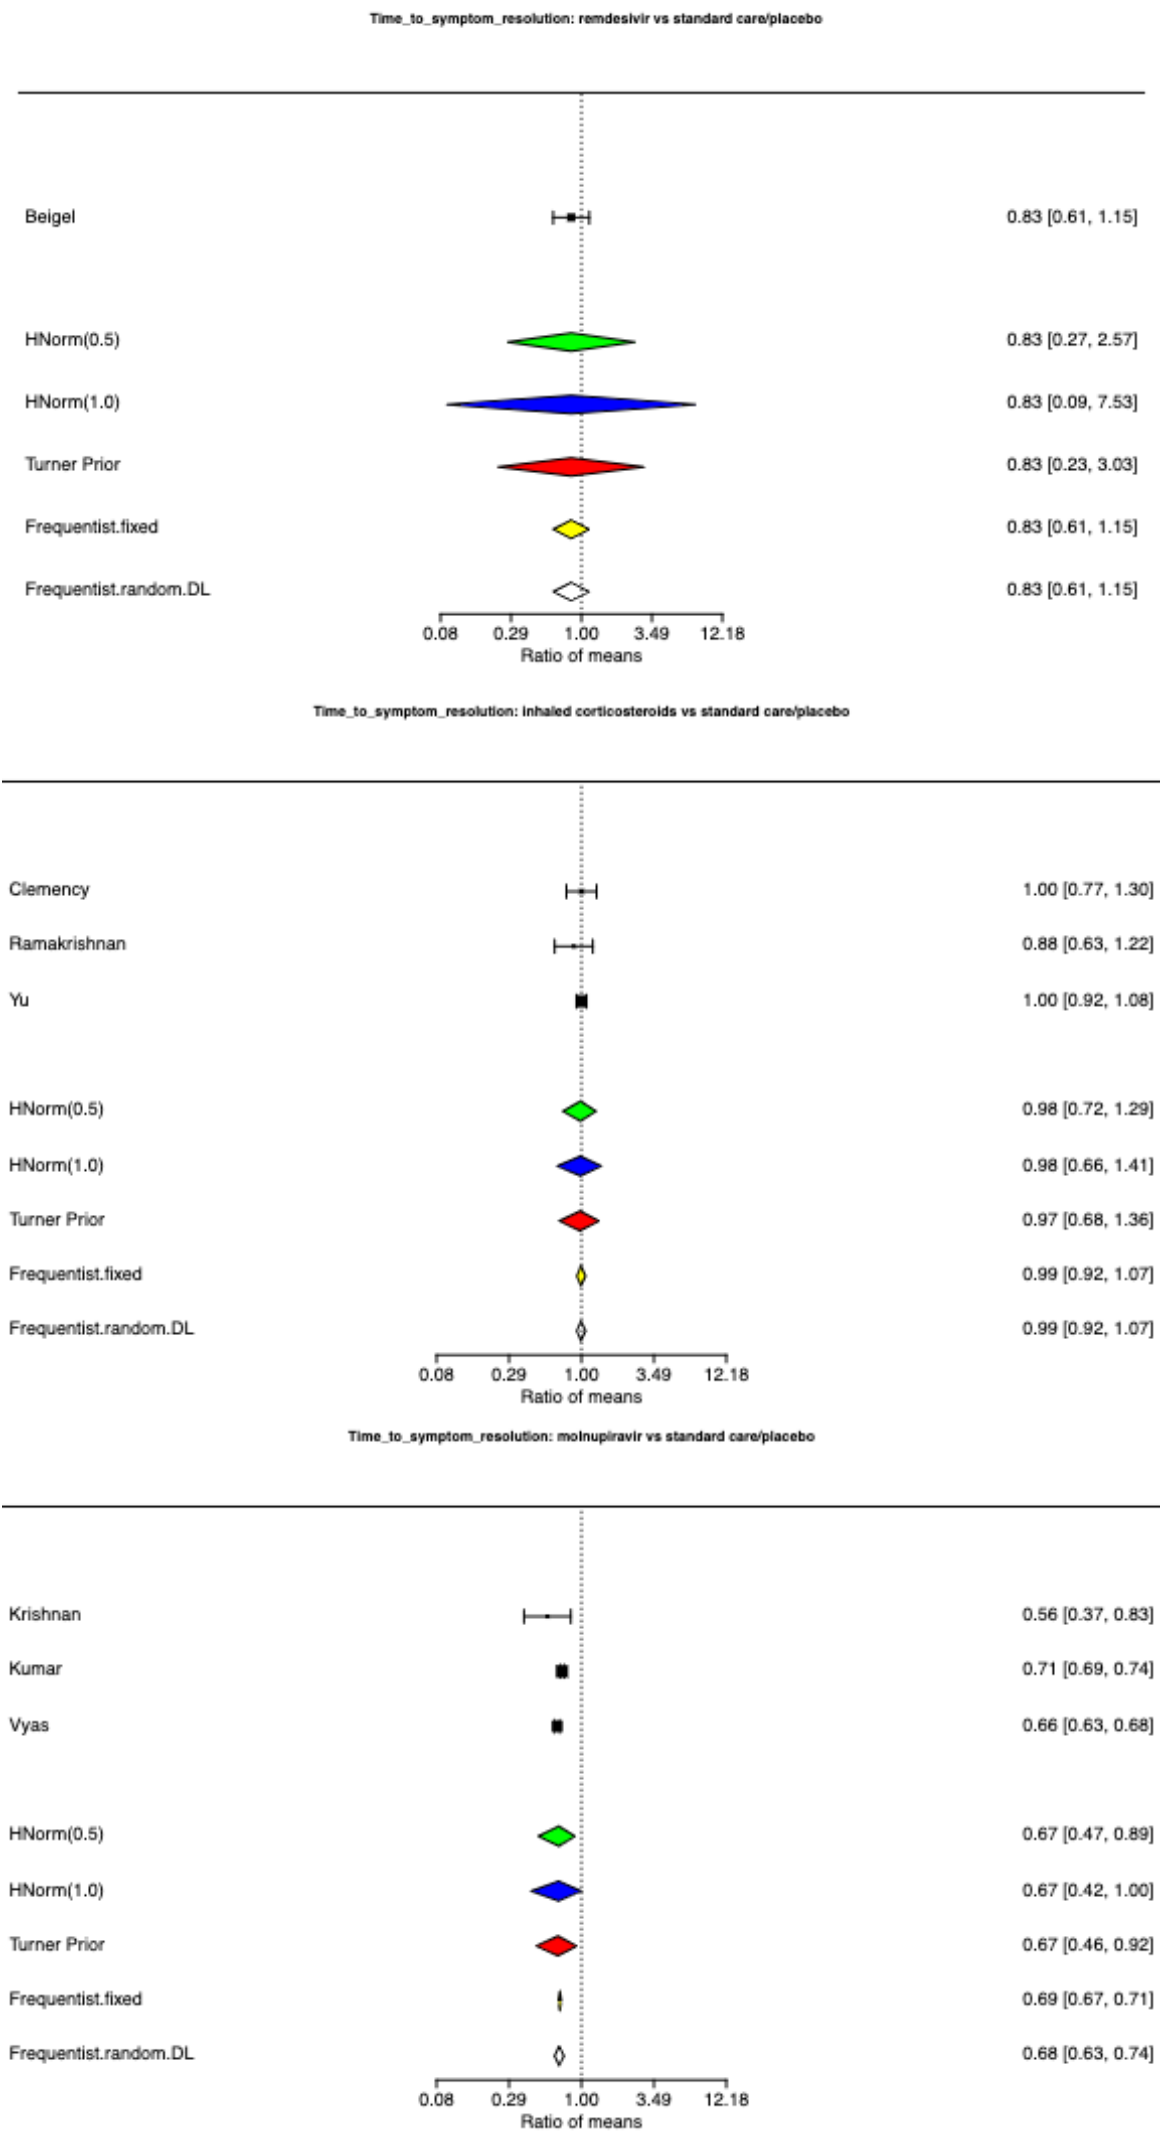



| Comparison                 |                         | Direct estimate  |                |                |                           |                |                | Indirect estimate |                |                |                           |                |                | Network estimate |                |                |                           |                |                |
|----------------------------|-------------------------|------------------|----------------|----------------|---------------------------|----------------|----------------|-------------------|----------------|----------------|---------------------------|----------------|----------------|------------------|----------------|----------------|---------------------------|----------------|----------------|
| Treatment 1                | Treatment 2             | Relative effects |                |                | Absolute effect per 1,000 |                |                | Relative effects  |                |                | Absolute effect per 1,000 |                |                | Relative effects |                |                | Absolute effect per 1,000 |                |                |
|                            |                         | Point estimate   | CI lower limit | CI upper limit | Point estimate            | CI lower limit | CI upper limit | Point estimate    | CI lower limit | CI upper limit | Point estimate            | CI lower limit | CI upper limit | Point estimate   | CI lower limit | CI upper limit | Point estimate            | CI lower limit | CI upper limit |
| fluvoxamine                | molnupiravir            | NA               | NA             | NA             | NA                        | NA             | NA             | 1.78              | 0.24           | 10.26          | 2.84                      | -10.51         | 15.95          | 1.78             | 0.24           | 10.26          | 2.84                      | -10.51         | 15.95          |
| fluvoxamine                | remdesivir              | NA               | NA             | NA             | NA                        | NA             | NA             | 1.64              | 0.22           | 11.17          | 2.37                      | -12.96         | 15.76          | 1.64             | 0.22           | 11.17          | 2.37                      | -12.96         | 15.76          |
| fluvoxamine                | sotrovimab              | NA               | NA             | NA             | NA                        | NA             | NA             | 1.66E+15          | 69.49          | 2.41E+56       | 8.44                      | 1.83           | 20.33          | 1.66E+15         | 69.49          | 2.41E+56       | 8.44                      | 1.83           | 20.33          |
| inhaled corticosteroids    | molnupiravir            | NA               | NA             | NA             | NA                        | NA             | NA             | 2.65              | 0.37           | 19.86          | 8.67                      | -8.16          | 36.90          | 2.65             | 0.37           | 19.86          | 8.67                      | -8.16          | 36.90          |
| inhaled corticosteroids    | remdesivir              | NA               | NA             | NA             | NA                        | NA             | NA             | 2.46              | 0.32           | 21.12          | 8.19                      | -10.30         | 36.82          | 2.46             | 0.32           | 21.12          | 8.19                      | -10.30         | 36.82          |
| inhaled corticosteroids    | sotrovimab              | NA               | NA             | NA             | NA                        | NA             | NA             | 2.66E+15          | 104.33         | 3.99E+56       | 14.27                     | 2.65           | 42.22          | 2.66E+15         | 104.33         | 3.99E+56       | 14.27                     | 2.65           | 42.22          |
| molnupiravir               | remdesivir              | NA               | NA             | NA             | NA                        | NA             | NA             | 0.93              | 0.11           | 8.01           | -0.48                     | -15.41         | 12.28          | 0.93             | 0.11           | 8.01           | -0.48                     | -15.41         | 12.28          |
| molnupiravir               | sotrovimab              | NA               | NA             | NA             | NA                        | NA             | NA             | 9.26E+14          | 37.86          | 1.43E+56       | 5.60                      | 0.93           | 17.02          | 9.26E+14         | 37.86          | 1.43E+56       | 5.60                      | 0.93           | 17.02          |
| remdesivir                 | sotrovimab              | NA               | NA             | NA             | NA                        | NA             | NA             | 1.05E+15          | 36.44          | 1.50E+56       | 6.07                      | 0.91           | 19.90          | 1.05E+15         | 36.44          | 1.50E+56       | 6.07                      | 0.91           | 19.90          |
| Mortality                  |                         |                  |                |                |                           |                |                |                   |                |                |                           |                |                |                  |                |                |                           |                |                |
| fluvoxamine                | standard care/placebo   | 0.70             | 0.22           | 2.29           | -0.57                     | -1.49          | 2.44           | NA                | NA             | NA             | NA                        | NA             | NA             | 0.68             | 0.24           | 1.86           | -0.38                     | -1.45          | 1.89           |
| inhaled corticosteroids    | standard care/placebo   | 0.90             | 0.09           | 9.41           | -0.20                     | -1.74          | 15.69          | NA                | NA             | NA             | NA                        | NA             | NA             | 0.00             | 0.00           | 440924.97      | 61.82                     | -1.90          | 998.10         |
| molnupiravir               | standard care/placebo   | 0.29             | 0.08           | 1.02           | -1.35                     | -1.74          | 0.03           | NA                | NA             | NA             | NA                        | NA             | NA             | 0.11             | 0.01           | 0.55           | -1.62                     | -1.88          | -0.94          |
| nirmatrelvir, ritonavir    | standard care/placebo   | 0.12             | 0.01           | 1.39           | -1.68                     | -1.88          | 0.74           | NA                | NA             | NA             | NA                        | NA             | NA             | 0.00             | 0.00           | 0.01           | -1.89                     | -1.90          | -1.84          |
| remdesivir                 | standard care/placebo   | 0.68             | 0.34           | 1.35           | -0.61                     | -1.26          | 0.66           | NA                | NA             | NA             | NA                        | NA             | NA             | 0.67             | 0.32           | 1.36           | -0.56                     | -1.32          | 0.69           |
| sotrovimab                 | standard care/placebo   | 0.20             | 0.01           | 5.23           | -1.52                     | -1.89          | 7.95           | NA                | NA             | NA             | NA                        | NA             | NA             | 0.00             | 0.00           | 0.14           | -1.86                     | -1.90          | -1.69          |
| fluvoxamine                | inhaled corticosteroids | NA               | NA             | NA             | NA                        | NA             | NA             | #####             | 0.00           | 4.40E+24       | -62.20                    | -998.81        | 3.60           | 1.17E+06         | 0.00           | 4.40E+24       | -62.20                    | -998.81        | 3.60           |
| fluvoxamine                | molnupiravir            | NA               | NA             | NA             | NA                        | NA             | NA             | 6.10              | 0.93           | 64.70          | 1.24                      | -0.01          | 3.53           | 6.10             | 0.93           | 64.70          | 1.24                      | -0.01          | 3.53           |
| fluvoxamine                | nirmatrelvir, ritonavir | NA               | NA             | NA             | NA                        | NA             | NA             | 1.41E+18          | 42.40          | 1.03E+32       | 1.51                      | 0.44           | 3.78           | 1.41E+18         | 42.40          | 1.03E+32       | 1.51                      | 0.44           | 3.78           |
| fluvoxamine                | remdesivir              | NA               | NA             | NA             | NA                        | NA             | NA             | 1.02              | 0.29           | 3.61           | 0.18                      | -1.50          | 2.57           | 1.02             | 0.29           | 3.61           | 0.18                      | -1.50          | 2.57           |
| fluvoxamine                | sotrovimab              | NA               | NA             | NA             | NA                        | NA             | NA             | 5.78E+10          | 4.67           | 2.73E+30       | 1.48                      | 0.38           | 3.77           | 5.78E+10         | 4.67           | 2.73E+30       | 1.48                      | 0.38           | 3.77           |
| inhaled corticosteroids    | molnupiravir            | NA               | NA             | NA             | NA                        | NA             | NA             | 0.00              | 0.00           | #####          | 63.45                     | -0.92          | 999.85         | 0.00             | 0.00           | 4.10E+06       | 63.45                     | -0.92          | 999.85         |
| inhaled corticosteroids    | nirmatrelvir, ritonavir | NA               | NA             | NA             | NA                        | NA             | NA             | 1.15E+10          | 0.00           | 1.42E+29       | 63.72                     | -0.06          | 1000.00        | 1.15E+10         | 0.00           | 1.42E+29       | 63.72                     | -0.06          | 1000.00        |
| inhaled corticosteroids    | remdesivir              | NA               | NA             | NA             | NA                        | NA             | NA             | 0.00              | 0.00           | 603016.60      | 62.38                     | -2.53          | 998.81         | 0.00             | 0.00           | 6.03E+05       | 62.38                     | -2.53          | 998.81         |
| inhaled corticosteroids    | sotrovimab              | NA               | NA             | NA             | NA                        | NA             | NA             | 11937.74          | 0.00           | 6.44E+25       | 63.68                     | -0.21          | 1000.00        | 1.19E+04         | 0.00           | 6.44E+25       | 63.68                     | -0.21          | 1000.00        |
| molnupiravir               | nirmatrelvir, ritonavir | NA               | NA             | NA             | NA                        | NA             | NA             | 1.97E+17          | 6.86           | 1.48E+31       | 0.27                      | 0.02           | 0.96           | 1.97E+17         | 6.86           | 1.48E+31       | 0.27                      | 0.02           | 0.96           |
| molnupiravir               | remdesivir              | NA               | NA             | NA             | NA                        | NA             | NA             | 0.17              | 0.02           | 0.95           | -1.06                     | -2.36          | -0.09          | 0.17             | 0.02           | 0.95           | -1.06                     | -2.36          | -0.09          |
| molnupiravir               | sotrovimab              | NA               | NA             | NA             | NA                        | NA             | NA             | 9.49E+09          | 0.61           | 4.37E+29       | 0.24                      | -0.02          | 0.95           | 9.49E+09         | 0.61           | 4.37E+29       | 0.24                      | -0.02          | 0.95           |
| nirmatrelvir, ritonavir    | remdesivir              | NA               | NA             | NA             | NA                        | NA             | NA             | 0.00              | 0.00           | 0.02           | -1.33                     | -2.59          | -0.58          | 0.00             | 0.00           | 0.02           | -1.33                     | -2.59          | -0.58          |
| nirmatrelvir, ritonavir    | sotrovimab              | NA               | NA             | NA             | NA                        | NA             | NA             | 0.00              | 0.00           | 1.05E+19       | -0.03                     | -0.20          | 0.06           | 0.00             | 0.00           | 1.05E+19       | -0.03                     | -0.20          | 0.06           |
| remdesivir                 | sotrovimab              | NA               | NA             | NA             | NA                        | NA             | NA             | 5.59E+10          | 4.50           | 2.50E+30       | 1.30                      | 0.52           | 2.58           | 5.59E+10         | 4.50           | 2.50E+30       | 1.30                      | 0.52           | 2.58           |
| Time to symptom resolution |                         |                  |                |                |                           |                |                |                   |                |                |                           |                |                |                  |                |                |                           |                |                |
| inhaled corticosteroids    | standard care/placebo   | 0.97             | 0.68           | 1.36           | -0.35                     | -3.91          | 4.40           | NA                | NA             | NA             | NA                        | NA             | NA             | 0.98             | 0.79           | 1.19           | -0.24                     | -2.62          | 2.32           |
| molnupiravir               | standard care/placebo   | 0.67             | 0.46           | 0.92           | -4.12                     | -6.66          | -0.98          | NA                | NA             | NA             | NA                        | NA             | NA             | 0.67             | 0.54           | 0.80           | -4.03                     | -5.62          | -2.48          |
| remdesivir                 | standard care/placebo   | 0.83             | 0.23           | 3.03           | -2.06                     | -9.51          | 25.01          | NA                | NA             | NA             | NA                        | NA             | NA             | 0.84             | 0.54           | 1.29           | -1.80                     | -5.63          | 3.40           |
| inhaled corticosteroids    | molnupiravir            | NA               | NA             | NA             | NA                        | NA             | NA             | 1.45              | 1.10           | 1.95           | 3.79                      | 0.99           | 6.84           | 1.45             | 1.10           | 1.95           | 3.79                      | 0.99           | 6.84           |
| inhaled corticosteroids    | remdesivir              | NA               | NA             | NA             | NA                        | NA             | NA             | 1.17              | 0.72           | 1.89           | 1.56                      | -4.18          | 6.18           | 1.17             | 0.72           | 1.89           | 1.56                      | -4.18          | 6.18           |
| molnupiravir               | remdesivir              | NA               | NA             | NA             | NA                        | NA             | NA             | 0.81              | 0.49           | 1.28           | -2.23                     | -7.68          | 1.89           | 0.81             | 0.49           | 1.28           | -2.23                     | -7.68          | 1.89           |

## Living network meta-analysis protocol and extended methods

# Therapies for treatment and prophylaxis of COVID-19: introduction and methods for a living systematic review and network meta-analyses

An international collaborative project

## Correspondence to

Reed AC Siemieniuk

[reed.siemieniuk@medportal.ca](mailto:reed.siemieniuk@medportal.ca)

## Abstract

**Objectives:** To compare the effects of therapies for prophylaxis and treatment of COVID-19

**Design:** Living systematic review and network meta-analysis (NMA).

**Data sources:** U.S. Centers for Disease Control and Prevention (CDC) COVID-19 Research Articles Downloadable Database, which includes 25 electronic databases.

**Study selection:** We will include randomized clinical trials (RCT) in which persons exposed to COVID-19 or with suspected, probable or confirmed COVID-19 were treated with pharmaceuticals or blood products aimed at prophylaxis or treatment. Pairs of independent reviewers will screen in duplicate title and abstract and full text of potentially eligible articles.

**Methods:** After duplicate data abstraction, we will conduct a Bayesian-random effects network meta-analysis for each of the outcomes of interest. We will assess the risk of bias of the included studies using a modification of the Cochrane Risk of Bias 2.0 tool, and the certainty of the evidence using the GRADE approach for NMA. We will classify the interventions in groups from the most to the least effective/ harmful following GRADE guidance using a minimally contextualized approach.

**Publication and Updating of Results:** We will publish and update the results in *The BMJ* and [magicapp.org](http://magicapp.org). We will update the living NMA when the question is no longer of clinical importance, or new evidence that might impact on the conclusions is unlikely to be forthcoming.

## Background

COVID-19 is a rapidly evolving global health emergency. As of 27 May 2020, over 5.6 million people have been infected and of these, 335,000 have died,<sup>1</sup> resulting in an enormous perceived need to implement a possibly effective intervention. Public figures,<sup>2</sup> guideline bodies,<sup>3</sup> and government agencies<sup>4</sup> have suggested using interventions without established benefit. Clinicians have responded to these suggestions by administering such interventions to large numbers of patients.<sup>5</sup>

With many teams conducting randomized clinical trials (RCTs) of drug interventions—over 1,000 intervention trials registered as of 10 May 2020<sup>6</sup>—evidence on the comparative effectiveness of

drug interventions will emerge rapidly. The new environment will amplify the need for evidence based medicine: distinguishing trustworthy from untrustworthy evidence, interpreting the results, and judging net benefits of interventions against standard treatment and one another.<sup>7</sup>

Reliable guidance for COVID-19 will require adherence to standards of trustworthy clinical practice guidelines,<sup>8</sup> including methodically rigorous and rapidly updated evidence summaries. Such summaries will identify interventions with sufficient evidence of net benefit to warrant use. Establishing absence of net benefit in previously highly touted interventions may be equally important. Further, if studies suggest that more than one intervention provides net benefit, clinicians and patients will face the challenge of deciding which intervention to use.

Our living systematic review and network meta-analysis (NMA), updated in real time, will answer this urgent demand for trustworthy evidence on the available therapeutic options. This systematic review is part of the *BMJ Rapid Recommendations* project, a collaborative effort from the MAGIC Evidence Ecosystem Foundation ([www.magicproject.org](http://www.magicproject.org)) and *The BMJ*. Our living NMA will thus directly inform *BMJ Rapid Recommendations*,<sup>9</sup> providing trustworthy, actionable, and living guidance to clinicians and patients soon after new and potentially practice-changing evidence is made available. The living NMA will be freely available in user-friendly formats, through *The BMJ* and MAGICapp ([www.magicapp.org](http://www.magicapp.org)), and ready for re-use and adaptation at national and local levels.

## Methods

### Structure and organization

The team working in the development of this living systematic review and NMA is composed of the following groups:

- a. Oversight group composed of experts in the clinical area and systematic review methodology (RAC, TA, GHG, BR, FL, SM, PV). The role of this team is to ensure that the process follows the highest methodological standards, and that the decisions made are clinically sensible and keep consistency with the needs of the *BMJ Rapid Recommendations*.
- b. Core systematic review team leaders. This group is composed of methodologists leading teams in charge of study identification (JB), data abstraction (DZ), data analysis (LG), and assessment of certainty of the evidence and presentation (RBP).
- c. Reviewers. This team is composed of clinicians, graduate students, methodologists, and biostatisticians conducting or providing advice for screening, data abstraction, and assessments of certainty of the evidence.

In addition, decisions in this protocol have been made considering the requirements from the *Rapid Recommendations* guideline panel, which includes patients.

### Eligibility criteria

We will include RCTs in which persons exposed to COVID-19 or with suspected, probable, or confirmed COVID-19 are treated with pharmacologic or blood products aimed at prophylaxis or

treatment. We will include trials in which researchers compare any intervention against another or against no intervention, placebo, or standard of care, and report any outcome. We will include trials that report results regardless of publication status (peer-reviewed, in press, or pre-print, but not news reports alone) or language. There will be no restrictions on acuity of disease, nor setting.

We will include trials of pharmaceuticals, blood products, vitamins, minerals and, if the drug is one specific molecule, Chinese medicines. We will exclude quasi-randomized studies and randomized trials evaluating external organ support, plasma exchange, oxygen delivery, ventilation strategies, vaccination, nutrition, traditional Chinese herbal medicines (that typically include more than one molecule or a molecule without specific molecular weighted dosing), exercise/rehabilitation, psychological and educational interventions, personal protective equipment, or any other non-drug supportive care interventions.

### **Data sources and searches**

We will search the U.S. Centers for Disease Control and Prevention (CDC) COVID-19 Research Articles Downloadable Database for eligible studies—the most comprehensive database of COVID-19 research articles from December 2019 and which is maintained by the Stephen B. Thacker CDC library<sup>10</sup>. We will update our search daily Monday to Friday to match the update schedule of the database. The database includes 25 bibliographic and grey literature sources: Medline (Ovid and PubMed), PubMed Central, Embase, CAB Abstracts, Global Health, PsycInfo, Cochrane Library, Scopus, Academic Search Complete, Africa Wide Information, CINAHL, ProQuest Central, SciFinder, the Virtual Health Library, LitCovid, WHO COVID-19 website, CDC COVID-19 website, Eurosurveillance, China CDC Weekly, Homeland Security Digital Library, ClinicalTrials.gov, bioRxiv (preprints), medRxiv (preprints), chemRxiv (preprints), and SSRN (preprints).

We will filter the results from the CDC's database through a validated and highly sensitive machine learning model to identify RCTs.<sup>11</sup> We will track preprints of RCTs until publication and data updated to match that in the peer-reviewed publication when discrepant. In addition, we will search six Chinese databases on a biweekly basis: Wanfang, CBM, CNKI, VIP, Chinese Medical Journal Net (preprints), and ChinaXiv (preprints). The search terms for COVID-19 developed by the CDC have been adapted to the Chinese language. For the search of the Chinese literature, we will also include search terms for randomized trials. The search strategy is available in the Supplementary Material.

We will also monitor living evidence retrieval services on an ongoing basis. Two such services are the Systematic and Living Map on COVID-19 Evidence by the Norwegian Institute of Public Health, in collaboration with the Cochrane Canada Centre at McMaster University,<sup>12</sup> and the Living Overview of Evidence (L-OVE) by Epistemonikos Foundation.<sup>13</sup> Our publication will be accompanied with a public call for information sharing, with hopes that investigators will initiate contact and share information when available. RCTs may also be identified organically through informal networks.

## Study selection

Pairs of reviewers will independently and in duplicate screen titles and abstracts followed by full texts. A third reviewer will adjudicate conflicts.

## Data extraction

For each eligible trial, two reviewers, who have undergone training and have completed calibration exercises, will extract data independently and in duplicate using a standardised, pilot-tested data extraction form. Discrepancies will be resolved by discussion, and when necessary adjudicated by a third person. The study characteristics and baseline participant information that will be extracted is presented in Box 1.

### **Box 1.** Study characteristics and baseline participant information that will be extracted

- Geographic location
- Physical location (outpatient, inpatient, intensive care)
- Patient and public involvement in the study design or interpretation
- Funder (public, private)
- Number randomized
- Number randomized to each intervention
- Dose, frequency, route of administration, and duration for each intervention
- Number who received each intervention
- Mean age
- Percent male
- Severity of illness (non-severe, severe, critically ill)
- Mean oxygen saturation on room air, or mean baseline amount of supplemental oxygen
- Percent receiving mechanical ventilation at baseline
- Percent current and former smokers
- Percent with hypertension
- Percent with underlying chronic respiratory condition including chronic obstructive pulmonary disease (COPD), asthma, and others
- Percent with diabetes
- Percent taking angiotension-converting-enzyme (ACE) inhibitors or angiotensin receptor blockers (ARBs)
- Mean alanine aminotransferase (ALT)
- Mean C-reactive protein (CRP)
- Mean d-dimer
- Mean lactate dehydrogenase (LDH)
- Mean lymphocyte count, and percent with lymphopaenia

## Outcomes

We will begin by focusing on the patient-important outcomes listed below, based on the WHO's candidate core outcome set.<sup>14</sup> The list of outcomes may be modified at the discretion of the BMJ

*Rapid Recommendations* standing panel of experts, which includes frontline healthcare workers and patient-partners. As harms are typically specific to individual pharmacologic therapies, these outcomes will be selected at the time they are needed to support specific linked Rapid Recommendations. We will extract the outcome data closest to the prespecified outcome time point.

The initial outcomes examined for the studies of treatment will include:

- Mortality (time frame: closest to 90 days)
- Mechanical ventilation in patients not initially mechanically ventilated (time frame: closest to 90 days)
- Duration of hospitalization
- Admission to hospital (time frame: closest to 28 days)
- Adverse effects leading to discontinuation of the intervention (time frame: closest to 28 days)
- Time to symptom resolution
- Time until the amount of SARS-CoV2 viral particles is below the threshold set by the RCT authors for being likely no longer infectious (as a surrogate for transmissibility)
- Undetectable nCoV-19 by PCR (time frame: closest to 7 days and not less than 4 days or more than 10 days)

The initial outcomes examined for the studies of prophylaxis will include:

- Symptomatic SARS-CoV2 infection (time frame: closest to 28 days)
- Mortality (time frame: closest to 90 days)
- Admission to hospital (time frame: closest to 28 days)
- Adverse effects leading to discontinuation of the intervention (time frame: closest to 28 days)
- Time to symptom resolution (those not infected will be considered 0)

Other outcomes that will be extracted and reported from the trials, but not initially reviewed will include:

- Ventilator-free days (time frame: 28 days)
- Venous thromboembolism (time frame: closest to 90 days)
- Clinically important bleeding (time frame: closest to 90 days)

### **Risk of bias assessments**

Following calibration exercises, two reviewers, working independently and in duplicate, will use the Clinical Advances Through Research and Information Translation (CLARITY) revisions of the Cochrane tool for assessing risk of bias in randomized trials (RoB 2.0) to rate trials as either ‘low risk of bias’, ‘some concerns – probably low risk of bias’, ‘some concerns – probably high risk of bias’ and ‘high risk of bias’, across the following domains: bias arising from the randomization process, bias due to departures from the intended intervention, bias due to missing outcome data, bias in measurement of the outcome, bias in selection of the reported results.<sup>15 16</sup> The

response choice ‘some concerns’ was modified to include a judgement about whether the concerns probably do or do not result in high risk of bias.<sup>16</sup> We will not consider judgements about applicability when considering risk of bias because applicability is judged separately within indirectness domain of the GRADE framework.<sup>17</sup> In addition, the modified tool includes an additional domain to assess risk of bias related to RCTs stopping early for benefit.<sup>18</sup> Reviewers will resolve discrepancies by discussion, and when not possible, adjudication by a third-party research methodologist. A detailed guide for our risk of bias assessments is available in the Supplementary Material. If the body of evidence is rated as high risk of bias for missing data only (i.e., no serious concerns with any other of the risk of bias domains), we may perform sensitivity analyses with worst plausible assumptions to see if results remain robust to missing data.

### **Treatment nodes**

We will perform three separate network meta-analyses: i) pharmacologic treatments for patients with suspected or confirmed COVID-19, ii) blood products for treatment of patients with suspected or confirmed COVID-19, and iii) pharmacologic prophylactic therapy for people exposed to COVID-19.

Treatments will be grouped into common nodes based on molecule but not dose or duration: we will include all doses and durations of the same medication in a single treatment node. When an intervention includes more than one medication, it will be included as a separate node. We will include drugs from the same class within the same node. Chloroquine and hydroxychloroquine will be included in the same node for COVID-19 specific effects and separated for disease-independent adverse effects. Prespecified nodes include angiotensin-converting enzyme inhibitors and angiotensin receptor blockers, anti-interleukin-6 agents (i.e., tocilizumab, sarilumab), glucocorticoids, interferons, JAK inhibitors, statins, antiplatelet agents, and anticoagulants. Antibiotics will be grouped into nodes by class (e.g., macrolides, beta-lactams). The NMA oversight group and the linked Rapid Recommendation panels will make final decisions on how to group treatment nodes.

### **Data synthesis**

We will perform random-effects pairwise meta-analysis for each comparison for each outcome using the Bayesian framework. We will use a plausible prior for variance parameter,<sup>19</sup> and uniform prior for the effect parameter. We will calculate Ratio of Means (RoM) and corresponding 95% credible intervals (CrIs) for continuous outcomes in which we expect variation across populations (time to symptoms resolution and time to viral clearance) and mean differences (MDs) and corresponding 95% credible intervals (CrIs) for other continuous outcomes. For dichotomous outcomes, we will calculate odds ratios (ORs) with corresponding CrIs. Absolute effects will be calculated based on the ORs and baseline risk of standard of care.<sup>20</sup> We will create a funnel plot to assess the publication bias when 10 or more studies are available for a specific direct comparison.<sup>21</sup>

We will conduct a random-effects network meta-analysis using the Bayesian framework with same priors for the variance and effect parameters.<sup>19</sup> We will use three Markov-chains with 100,000 iterations after an initial burn-in of 10,000 and a thinning of 10. We will assess the

convergence based on trace plots and the Brooks-Gelman-Rubin statistic, with an acceptable threshold of  $<1.05$  for all nodes. If convergence is not achieved, then we will use 500,000 iterations and a burn-in of 50,000 iterations and a thinning of 10. We will use automated generation of node-splitting models to assess local incoherence and to obtain indirect estimates.<sup>22</sup> We will estimate ranking probabilities and calculate surface under the cumulative ranking curves (SUCRA). For all dichotomous outcomes, we will calculate the absolute treatment effects of the network estimates based-on the odds ratios and the baseline risk using the transitive risks model.<sup>23</sup> To obtain the baseline risk, we will use the highest quality prognostic evidence available at the time of publication, typically based on a systematic review of prognostic studies.<sup>24</sup>

When networks are sparse, between-study heterogeneity variances are often imprecisely estimated. That may generate implausibly wide credible intervals from network estimates, even when the direct and indirect estimates are coherent.<sup>25</sup> When this occurs, we will conduct sensitivity analyses by using empirically informative priors,<sup>26</sup> and fixed effects models.<sup>25</sup> Another situation in which implausibly wide confidence intervals occur is with random effects when the number of studies is small and the heterogeneity is considerable, particularly when study size varies markedly. This is a second situation in which we may opt for fixed effect models.

Pairwise meta-analysis will be conducted using the bayesmeta package of R version 4.0.0 (RStudio, Boston, MA).<sup>27</sup> All network meta-analyses will be performed using the *gemtc* package of R version 4.0.0 (RStudio, Boston, MA),<sup>28</sup> absolute effects in networks will be calculated using *R2jags* package of R version 4.0.0 (RStudio, Boston, MA)<sup>29</sup>. *networkplot* command of Stata version 15.1 (StataCorp, College Station, Texas, USA) will be used to draw the network plots with thickness of edges of the nodes based on inverse variance.<sup>30</sup> The foundational R code that we will use is available in the Supplementary Material.

### **Subgroups and sensitivity analyses**

We will conduct sensitivity analyses and network meta-regression to explore factors that may modify the comparative effect estimates. Specific analyses will be guided by the linked *Rapid Recommendation* guideline panels with the directive to explore a limited number of pre-defined subgroup effects with a specified rationale and anticipated direction of the effect. When sufficient heterogeneity in risk of bias exists, we will perform subgroup analyses comparing studies at low versus high risk of bias. We will classify all studies with at least 1 domain judged at high risk of bias or probably high risk of bias as a high risk of bias study. Ultimately, we will base decisions regarding the credibility of subgroup analyses on the ICEMAN instrument,<sup>31</sup> and follow GRADE guidance on how to deal with low, intermediate, and high credibility subgroup effects.<sup>32</sup>

For all outcomes, we will first include both peer-reviewed and non-peer reviewed data, and then perform a sensitivity analysis by restricting to peer-reviewed publications. When the guideline panel makes a recommendation about a drug class with more than one drug, we will consider performing a sensitivity analysis with individual molecules rather than drug class as the nodes.

### **Certainty assessment**

We will evaluate the certainty of evidence using the GRADE approach for network meta-analysis.<sup>33-35</sup> We will rate the certainty for each comparison and outcome as high, moderate, low, or very low, based on considerations of risk of bias, inconsistency, indirectness, publication bias, intransitivity, incoherence, and imprecision. If and when sufficient effective treatments are available we will, for each outcome, use the GRADE framework to make conclusions by classifying the interventions in groups from the most to the least effective using a minimally contextualized approach.<sup>36</sup>

### **Updating**

Full results will be updated at minimum every two weeks on webpages hosted by BMJ.com and magicapp.org. A summary of the interim results, risk of bias assessments, individual study data summaries, and the date of the search will be posted in a table within the online publication. Results will be updated more frequently if the project steering committee or the linked BMJ Rapid Recommendations guidelines panel judges that there is sufficient new information to possibly change practice and requests an earlier update. Updates will be submitted to international indexes through the mechanism for corrections but labelled as updates. Old versions and details of any changes will be dated and documented in the Supplementary Material. It may be necessary to adjust some of the processes, outcomes, and analytic methods based on the data. The systematic review team will decide together whether changes to the pre-specified protocol are needed and these changes will be documented in the methods section of the updated review.

### **External review**

A standing peer-review committee editorial staff at The BMJ, clinical experts, patients, and statistician(s) will be tasked with providing feedback on the protocol and initial publication, and a subcommittee will peer review updates. The systematic review team will respond to these comments on an urgent basis. Comments from peer reviewers and responses will be made public. The study webpage will include functionality for comments to be made by any member of the public. The systematic review team will endeavor to respond to all public comments in a timely manner.

### **Publication**

The papers will be published in a traditional format for systematic reviews and network meta-analyses. In addition, results will be published in interactive evidence summary and decision aid formats for multiple comparisons and pairwise comparisons on MAGICapp ([www.magicapp.org](http://www.magicapp.org)). The publication will include infographics that highlight the key messages from the current state of the evidence.

### **Determining the end of project**

The project will terminate at the discretion of the project oversight group, which includes representation from the MAGIC Evidence Ecosystem Foundation, The BMJ, the WHO, and international collaborators with clinical and research expertise. We anticipate that the project will end when the question is no longer of clinical importance, or new evidence that might impact on the conclusions is unlikely to be forthcoming. If the influx of new RCT results slows, then the project oversight committee may choose to decrease the frequency of updates.

### Data access

All extracted data will be made available publicly at the time of the updates to be shared and used freely.

### Changes to the protocol

All changes to the protocol are reported in Table 1 and will be updated as necessary.

### Discussion

Our living network meta-analysis will provide up to date information to interested users, including healthcare workers, patients, healthcare agencies, guideline bodies, and governments. It will directly inform joint clinical practice guidelines from BMJ Rapid Recommendations.

We anticipate several challenges. First, living systematic reviews require substantial dedication and human resources.<sup>37</sup> To address this, we will organize our large team into smaller groups with specific responsibilities, including i) a study identification team, ii) a data extraction and management team, iii), a data analysis team, iv) a grading and publications team, and v) an oversight team. In addition, *The BMJ* will recruit a standing external review committee that will become familiar with the research methods and respond quickly to updates.

Second, the need for recurrent updates conflicts with traditional publication formats. Frequent updates resulting in new publications can have a devastating effect on a journal's impact factor. It may also be confusing for users who want to find the most recent update. To solve this problem, we plan to i) have a reference website with the links to the latest versions, ii) use headers on previous versions stating that they are outdated with a link to the current version, iii) use PubMed's corrections mechanism so that the updated publication keeps the same digital object identifier (DOI) and PubMed identification number.

Evidence summaries will also be published online with MAGICapp ([www.magicapp.org](http://www.magicapp.org)) developed for the purpose of dynamic updating and with electronic publication formats not subject to the limitations of traditional publishing formats thus allowing presentation of evidence summaries in multilayered user-friendly formats.<sup>38</sup>

Third, the optimal methodological and statistical methods may change as the number of RCTs and participants increases. In particular, early NMAs are likely to be sparse, and we may have to use specific analytic methods to accommodate these situations.<sup>25</sup> Our oversight committee and semi-independent guideline panels will provide direction and guidance on whether and how the methods should be adopted to the current situation.

Another major concern with living systematic reviews is limitations in the evidence included, in particular bias. We will assess risk of bias of each study using a standardized tool,<sup>15 16</sup> and assess risk of bias for each comparison using the GRADE framework.<sup>33 34</sup> Publication bias is of particular concern with living reviews: studies with positive results are more likely to be published at all, and when published are likely to be published earlier.<sup>39</sup> We will use the GRADE approach, which

considers publication bias, to rate certainty for the estimated effect for each comparison.<sup>21</sup> Clinical practice guideline panels of whom the majority will be independent of this review, will consider this issue when making recommendations for practice, and their scrutiny may bear on certainty of evidence judgements.<sup>9</sup>

There are at least two other groups planning a similar living systematic review and NMA.<sup>40 41</sup> More than one group performing similar analyses will allow controlled replication and the scientific community to assess reproducibility of the findings. Our review has advantages over the alternatives, including the use of and experience with GRADE for NMA, an established platform in the *BMJ Rapid Recommendations* project; an established collaboration with and early involvement of the publisher (*The BMJ*); and interpretation from a semi-independent *BMJ Rapid Recommendations* guideline panels; inclusion of a dedicated search of the Chinese literature; and co-publication in MAGICapp through its interactive multilayered evidence presentation format.

### Conclusions

The COVID-19 pandemic necessitates rapid interpretation of new evidence addressing therapeutic and prophylactic options. Our living systematic review and NMA will provide a reference point for those interested in the most trustworthy evidence regarding these therapies. Our project will facilitate the movement of evidence into practice much sooner than traditional publication methods.

**Table 1.** Changes to the protocol

| Date         | Change                                                                                               | Rationale                                                                                   |
|--------------|------------------------------------------------------------------------------------------------------|---------------------------------------------------------------------------------------------|
| 15 July 2020 | Network analyses will only include treatment nodes with at least 100 patients or at least 20 events. | Early analyses with sparse data resulted in implausible and uninformative effect estimates. |

## References

1. John Hopkins University. Coronavirus Resource Center 2020 [Available from: <https://coronavirus.jhu.edu/map.html> accessed April 27 2020.
2. Wong JC. Hydroxychloroquine: how an unproven drug became Trump's coronavirus 'miracle cure'. *The Guardian* 2020 07/04/2020.
3. Ye Z, Rochwerg B, Wang Y, et al. Treatment of patients with nonsevere and severe coronavirus disease 2019: an evidence-based guideline. *CMAJ* 2020 doi: 10.1503/cmaj.200648 [published Online First: 2020/05/01]
4. U.S. Food and Drug Administration. Request for Emergency Use Authorization For Use of Chloroquine Phosphate or Hydroxychloroquine Sulfate Supplied From the Strategic National Stockpile for Treatment of 2019 Coronavirus Disease. In: (HHS) USDoHaHS, ed., 2020:1-8.
5. Kim AHJ, Sparks JA, Liew JW, et al. A Rush to Judgment? Rapid Reporting and Dissemination of Results and Its Consequences Regarding the Use of Hydroxychloroquine for COVID-19. *Ann Intern Med* 2020 doi: 10.7326/m20-1223 [published Online First: 2020/04/01]
6. Cytel. Global Coronavirus COVID-19 Clinical Trial Tracker 2020 [Available from: <https://www.covid19-trials.org/> accessed 6 May 2020.
7. World Health Organization. SUBJECT IN FOCUS: providing timely and accurate information to dispel the 'infodemic'. Coronavirus disease 2019 (COVID-19) Situation Report. Geneva, Switzerland, 2020.
8. Institute of Medicine. Institute of Medicine (US) Committee on Standards for Developing Trustworthy Clinical Practice Guidelines. Washington, DC: National Academy Press (US) 2011.
9. Siemieniuk RA, Agoritsas T, Macdonald H, et al. Introduction to BMJ Rapid Recommendations. *BMJ* 2016;354:i5191. doi: 10.1136/bmj.i5191 [published Online First: 2016/09/30]
10. The Stephen B. Thacker CDC Library. COVID-19 Research Articles Downloadable Database: U.S. Centers for Disease Control and Prevention (CDC); 2020 [Available from: <https://www.cdc.gov/library/researchguides/2019novelcoronavirus/researcharticles.html> accessed 6 May 2020.
11. Marshall IJ, Noel-Storr A, Kuiper J, et al. Machine learning for identifying Randomized Controlled Trials: An evaluation and practitioner's guide. *Res Synth Methods* 2018;9(4):602-14. doi: 10.1002/jrsm.1287 [published Online First: 2018/01/10]
12. Norwegian Institute of Public Health. NIPH systematic and living map on COVID-19 evidence 2020 [Available from: [https://www.norgesk.no/forskningskart/NIPH\\_mainMap.html](https://www.norgesk.no/forskningskart/NIPH_mainMap.html) accessed 6 May 2020.
13. EPISTEMONIKOS Foundation. Living Overview of Evidence (L-OVE) 2020 [Available from: <https://iloveevidence.com/> accessed 6 June 2020 2020.
14. WHO Working Group on the clinical characterization of COVID-19 infection. A candidate core outcome measure set for clinical research during the SARS-CoV-2/COVID-19 pandemic. Geneva, Switzerland: World Health Organization, 2020:1-16.
15. Sterne JAC, Savovic J, Page MJ, et al. RoB 2: a revised tool for assessing risk of bias in randomised trials. *BMJ (Clinical research ed)* 2019;366:l4898. doi: 10.1136/bmj.l4898 [published Online First: 2019/08/30]

16. Busse J, Guyatt G. Modification of Cochrane tool to assess risk of bias in randomized trials. 2013. <https://distillercer.com/wp-content/uploads/2014/02/Tool-to-Assess-Risk-of-Bias-in-Randomized-Controlled-Trials.docx> (accessed 6 Mar 2020).
17. Guyatt GH, Oxman AD, Kunz R, et al. GRADE guidelines: 8. Rating the quality of evidence--indirectness. *J Clin Epidemiol* 2011;64(12):1303-10. doi: 10.1016/j.jclinepi.2011.04.014 [published Online First: 2011/08/02]
18. Bassler D, Briel M, Montori VM, et al. Stopping randomized trials early for benefit and estimation of treatment effects: systematic review and meta-regression analysis. *Jama* 2010;303(12):1180-7. doi: 10.1001/jama.2010.310 [published Online First: 2010/03/25]
19. Röver C. Bayesian random-effects meta-analysis using the bayesmeta R package. *arXiv preprint arXiv:171108683* 2017
20. Guyatt G, Oxman AD, Akl EA, et al. GRADE guidelines: 1. Introduction-GRADE evidence profiles and summary of findings tables. *J Clin Epidemiol* 2011;64(4):383-94. doi: 10.1016/j.jclinepi.2010.04.026 [published Online First: 2011/01/05]
21. Guyatt GH, Oxman AD, Montori V, et al. GRADE guidelines: 5. Rating the quality of evidence--publication bias. *Journal of clinical epidemiology* 2011;64(12):1277-82. doi: 10.1016/j.jclinepi.2011.01.011 [published Online First: 2011/08/02]
22. van Valkenhoef G, Dias S, Ades AE, et al. Automated generation of node-splitting models for assessment of inconsistency in network meta-analysis. *Res Synth Methods* 2016;7(1):80-93. doi: 10.1002/jrsm.1167 [published Online First: 2015/10/16]
23. Spineli L, Brignardello-Petersen R, Heen A, et al. Obtaining absolute effect estimates to facilitate shared decision making in the context of multiple comparisons. Global Evidence Summit. Cape Town, South Africa, 2017.
24. Foroutan F, Guyatt G, Zuk V, et al. GRADE Guidelines 28: Use of GRADE for the assessment of evidence about prognostic factors: rating certainty in identification of groups of patients with different absolute risks. *Journal of clinical epidemiology* 2020;121:62-70. doi: 10.1016/j.jclinepi.2019.12.023 [published Online First: 2020/01/27]
25. Brignardello-Petersen R, Murad MH, Walter SD, et al. GRADE approach to rate the certainty from a network meta-analysis: avoiding spurious judgments of imprecision in sparse networks. *J Clin Epidemiol* 2019;105:60-67. doi: 10.1016/j.jclinepi.2018.08.022 [published Online First: 2018/09/27]
26. Turner RM, Davey J, Clarke MJ, et al. Predicting the extent of heterogeneity in meta-analysis, using empirical data from the Cochrane Database of Systematic Reviews. *Int J Epidemiol* 2012;41(3):818-27. doi: 10.1093/ije/dys041 [published Online First: 2012/03/31]
27. Röver C. Bayesian random-effects meta-analysis using the bayesmeta R~package. *Journal of Statistical Software* 2020;93(6):1-51. doi: 10.18637/jss.v093.i06
28. gemtc: Network Meta-Analysis Using Bayesian Methods [program]. R package version 0.8-4 version, 2020.
29. R2jags: Using R to Run 'JAGS' [program]. R package version 0.6-1 version, 2020.
30. Chaimani A, Higgins JP, Mavridis D, et al. Graphical tools for network meta-analysis in STATA. *PLoS One* 2013;8(10):e76654. doi: 10.1371/journal.pone.0076654 [published Online First: 2013/10/08]

31. Schandelmaier S, Briel M, Varadhan R, et al. A new instrument to assess the credibility of effect modification analyses (ICEMAN) in randomized controlled trials and meta-analyses *CMAJ [In Press]* 2020
32. Guyatt GH, Oxman AD, Kunz R, et al. GRADE guidelines: 7. Rating the quality of evidence--inconsistency. *J Clin Epidemiol* 2011;64(12):1294-302. doi: 10.1016/j.jclinepi.2011.03.017 [published Online First: 2011/08/02]
33. Brignardello-Petersen R, Bonner A, Alexander PE, et al. Advances in the GRADE approach to rate the certainty in estimates from a network meta-analysis. *J Clin Epidemiol* 2018;93:36-44. doi: 10.1016/j.jclinepi.2017.10.005 [published Online First: 2017/10/21]
34. Puhan MA, Schunemann HJ, Murad MH, et al. A GRADE Working Group approach for rating the quality of treatment effect estimates from network meta-analysis. *Bmj* 2014;349:g5630. doi: 10.1136/bmj.g5630 [published Online First: 2014/09/26]
35. Brignardello-Petersen R, Mustafa RA, Siemieniuk RAC, et al. GRADE approach to rate the certainty from a network meta-analysis: Addressing Incoherence. *J Clin Epidemiol* 2018 doi: 10.1016/j.jclinepi.2018.11.025 [published Online First: 2018/12/12]
36. Brignardello-Petersen R, Florez I, Izcovich A, et al. GRADE approach to drawing conclusions from a network meta-analysis using a minimally contextualized framework [Submitted for publication]. 2020
37. Elliott JH, Synnot A, Turner T, et al. Living systematic review: 1. Introduction-the why, what, when, and how. *Journal of clinical epidemiology* 2017;91:23-30. doi: 10.1016/j.jclinepi.2017.08.010 [published Online First: 2017/09/16]
38. Agoritsas T, Heen AF, Brandt L, et al. Decision aids that really promote shared decision making: the pace quickens. *BMJ (Clinical research ed)* 2015;350:g7624. doi: 10.1136/bmj.g7624 [published Online First: 2015/02/12]
39. Hopewell S, Loudon K, Clarke MJ, et al. Publication bias in clinical trials due to statistical significance or direction of trial results. *Cochrane Database Syst Rev* 2009(1):Mr000006. doi: 10.1002/14651858.MR000006.pub3 [published Online First: 2009/01/23]
40. Boutron I, Chaimani A, Devane D, et al. Interventions for preventing and treating COVID-19: protocol for a living mapping of research and a living systematic review. *Zenodo* 2020. <http://doi.org/10.5281/zenodo.3744600> (accessed 10 May 2020).
41. Juul S, Nielsen N, Bentzer P, et al. Interventions for treatment of COVID-19: a protocol for a living systematic review with network meta-analysis including individual patient data (The LIVING Project). *Syst Rev* 2020;9(1):108. doi: 10.1186/s13643-020-01371-0

Detailed risk of bias assessment guidance

| <b>Bias from the randomization process</b>                                  |                                                                                                                                                                                                                                                                                                                                                                                                                                                                                                                                                                                                                                                                                                                                                                                                                                                                                                                                      |
|-----------------------------------------------------------------------------|--------------------------------------------------------------------------------------------------------------------------------------------------------------------------------------------------------------------------------------------------------------------------------------------------------------------------------------------------------------------------------------------------------------------------------------------------------------------------------------------------------------------------------------------------------------------------------------------------------------------------------------------------------------------------------------------------------------------------------------------------------------------------------------------------------------------------------------------------------------------------------------------------------------------------------------|
| Issues to consider:<br>Random sequence generation<br>Allocation concealment |                                                                                                                                                                                                                                                                                                                                                                                                                                                                                                                                                                                                                                                                                                                                                                                                                                                                                                                                      |
| <b>Definitely low risk of bias</b>                                          | <p>Trials that assign participants to alternative interventions using a randomly generated sequence and maintain allocation concealment.</p> <p>Examples of methods for developing a randomly generated allocation sequence include a random number generator, random number table, coin tossing, shuffling cards or envelopes, and throwing dice. If a trial is described as 'randomized' without any additional details related to how the allocation sequence was developed, we will assume that the allocation sequence was appropriately developed.</p> <p>Examples of methods for maintaining allocation concealment include using central allocation via a computer or phone system, pharmacy-controlled allocation, opaque sealed envelopes, and sequentially numbered drug containers.</p> <p><i>Note that an explicit description of random sequence generation is not necessary for a rating of low risk of bias.</i></p> |
| <b>Probably low risk of bias</b>                                            | <p>Trials in which healthcare providers were blind to the intervention but which provide no information on allocation concealment and in which there are no major baseline imbalances.</p> <p><i>Note that an explicit description of random sequence generation is not necessary for a rating of probably low risk of bias.</i></p>                                                                                                                                                                                                                                                                                                                                                                                                                                                                                                                                                                                                 |
| <b>Probably high risk of bias</b>                                           | <p>Trials in which healthcare providers were not blind to the intervention and which provide no information on allocation concealment.</p> <p>Trials in which there are substantial baseline differences between trial arms that suggest a problem with the randomization process but there are no other limitations related to randomization.</p>                                                                                                                                                                                                                                                                                                                                                                                                                                                                                                                                                                                   |
| <b>Definitely high risk of bias</b>                                         | <p>Trials in which allocation is by judgment of the clinician, by preference of the participant, by availability of the intervention, based on the results of a laboratory test, or other non-random rules (e.g., birthdate, etc.).</p> <p>Trials in which investigators enrolling participants could possibly foresee the arm to which each subsequent patient would be randomized, such as allocation using an open allocation schedule (e.g. a list of random numbers), assignment envelopes used without appropriate safeguards (e.g. use of unsealed, non-opaque or not sequentially numbered envelopes), alternation between arms, case record number, or any other explicitly unconcealed procedure, rate as high risk.</p>                                                                                                                                                                                                   |
| <b>Bias due to deviations from the intended intervention</b>                |                                                                                                                                                                                                                                                                                                                                                                                                                                                                                                                                                                                                                                                                                                                                                                                                                                                                                                                                      |
| Issues to consider:                                                         |                                                                                                                                                                                                                                                                                                                                                                                                                                                                                                                                                                                                                                                                                                                                                                                                                                                                                                                                      |

| Blinding of healthcare providers/clinicians and participants<br>Imbalances in cointerventions or behaviors |                                                                                                                                                                                                                                                                                                                                                                                                                                                                                                                                                                                                                                                                                                                                                                                                                                                                                                                                                                                                                                                                                                             |
|------------------------------------------------------------------------------------------------------------|-------------------------------------------------------------------------------------------------------------------------------------------------------------------------------------------------------------------------------------------------------------------------------------------------------------------------------------------------------------------------------------------------------------------------------------------------------------------------------------------------------------------------------------------------------------------------------------------------------------------------------------------------------------------------------------------------------------------------------------------------------------------------------------------------------------------------------------------------------------------------------------------------------------------------------------------------------------------------------------------------------------------------------------------------------------------------------------------------------------|
| <b>Definitely low risk of bias</b>                                                                         | <p>Therapy trials in which healthcare providers are blind to the intervention administered and in which there are no significant differences in administered co-interventions.</p> <p>Therapy trials that are described as double or triple blind.</p> <p>Prophylaxis trials in which participants are blind to the intervention that they have been randomized.</p> <p>Prophylaxis trials that are described as double or triple blind.</p>                                                                                                                                                                                                                                                                                                                                                                                                                                                                                                                                                                                                                                                                |
| <b>Probably low risk of bias</b>                                                                           |                                                                                                                                                                                                                                                                                                                                                                                                                                                                                                                                                                                                                                                                                                                                                                                                                                                                                                                                                                                                                                                                                                             |
| <b>Probably high risk of bias</b>                                                                          | <p>Therapy trials in which healthcare providers are not blind to the intervention administered.</p> <p>Therapy trials in which healthcare providers are blind to the intervention administered but there are significant differences in administered co-interventions that suggests that blinding may have been compromised.</p> <p>Therapy trials in which healthcare providers are described as being blind to the intervention but allocation concealment was inadequate.</p> <p>Prophylaxis trials in which participants are not blind to the intervention that they have been randomized.</p> <p>Prophylaxis trials in which participants are blind to the intervention to which they have been randomized but there are significant differences in social distancing and risk-taking behaviors that suggest that blinding may have been compromised.</p> <p>Prophylaxis trials in which healthcare providers are not blind to the intervention and in which healthcare providers were very involved and counselled patients on social distancing, risk-taking behaviors, or testing for COVID-19.</p> |
| <b>Definitely high risk of bias</b>                                                                        | <p>Therapy trials in which healthcare providers are not blind to the intervention and in which there are significant differences in administered co-interventions.</p> <p>Prophylaxis trials in which participants are not blind to the intervention and in which there are significant differences in social distancing and risk-taking behaviors.</p>                                                                                                                                                                                                                                                                                                                                                                                                                                                                                                                                                                                                                                                                                                                                                     |
| <b>Bias due to missing data</b>                                                                            |                                                                                                                                                                                                                                                                                                                                                                                                                                                                                                                                                                                                                                                                                                                                                                                                                                                                                                                                                                                                                                                                                                             |
| <p>Issues to consider:</p> <p>Missing outcome measures</p> <p>Loss to follow-up</p>                        |                                                                                                                                                                                                                                                                                                                                                                                                                                                                                                                                                                                                                                                                                                                                                                                                                                                                                                                                                                                                                                                                                                             |

|                                                                                                                                                              |                                                                                                                                                                                                                                                                                                                                                                                                                                                                                                                                                                                                                                                                                                                                                         |
|--------------------------------------------------------------------------------------------------------------------------------------------------------------|---------------------------------------------------------------------------------------------------------------------------------------------------------------------------------------------------------------------------------------------------------------------------------------------------------------------------------------------------------------------------------------------------------------------------------------------------------------------------------------------------------------------------------------------------------------------------------------------------------------------------------------------------------------------------------------------------------------------------------------------------------|
| <b>Definitely low risk of bias</b>                                                                                                                           | <p>Trials in which missing outcome data (including outcome data that has been imputed) &lt; 10%.</p> <p>For in-patient trials, we will assume low risk of bias due to missing data unless otherwise specified.</p>                                                                                                                                                                                                                                                                                                                                                                                                                                                                                                                                      |
| <b>Probably low risk of bias</b>                                                                                                                             | Trials in which missing outcome data (including outcome data that has been imputed) is between 10% to 15% and missing outcome data is unlikely to be related to the true outcome and there is no imbalance in numbers of or reasons for missing data across intervention groups.                                                                                                                                                                                                                                                                                                                                                                                                                                                                        |
| <b>Probably high risk of bias</b>                                                                                                                            | Trials in which missing outcome data (including outcome data that has been imputed) is between 10% to 15% and missing outcome data is likely to be related to the true outcome or there are imbalances in numbers of or reasons for missing data across intervention groups.                                                                                                                                                                                                                                                                                                                                                                                                                                                                            |
| <b>Definitely high risk of bias</b>                                                                                                                          | Trials in which missing outcome data (including outcome data that has been imputed) > 15%.                                                                                                                                                                                                                                                                                                                                                                                                                                                                                                                                                                                                                                                              |
| <b>Bias due to measurement of the outcome</b>                                                                                                                |                                                                                                                                                                                                                                                                                                                                                                                                                                                                                                                                                                                                                                                                                                                                                         |
| <p>Issues to consider:<br/>Blinding of outcome adjudicators<br/>Objectivity of outcome</p> <p><i>Note that the judgments may differ across outcomes.</i></p> |                                                                                                                                                                                                                                                                                                                                                                                                                                                                                                                                                                                                                                                                                                                                                         |
| <b>Definitely low risk of bias</b>                                                                                                                           | <p>Trials in which patients are blind to the intervention and in which outcomes are patient-reported.</p> <p>Trials in which outcomes are measured by a third-party (investigator or clinician) and in which the third-party is blind to the intervention.</p> <p>Trials in which the outcomes are objective (e.g., mortality, infection with COVID-19 confirmed by a positive RT-PCR swab, mechanical ventilation, admission to hospital, duration of hospital stay, ICU length of stay, ventilator free days, duration of mechanical ventilation, time to clinical improvement if clinical improvement is measured via objective criteria, viral clearance, time to viral clearance).</p> <p>Trials that are described as double or triple blind.</p> |
| <b>Probably low risk of bias</b>                                                                                                                             |                                                                                                                                                                                                                                                                                                                                                                                                                                                                                                                                                                                                                                                                                                                                                         |
| <b>Probably high risk of bias</b>                                                                                                                            |                                                                                                                                                                                                                                                                                                                                                                                                                                                                                                                                                                                                                                                                                                                                                         |
| <b>Definitely high risk of bias</b>                                                                                                                          | <p>Trials in which patients are not blind and in which outcomes are patient-reported (e.g., time to symptom resolution).</p> <p>Trials in which outcome adjudicators are not blind and the outcomes are not objective (e.g., adverse effects leading to discontinuation, transfusion-related acute lung injury, transfusion-associated circulatory overload, allergic reactions, infection with suspected/symptomatic COVID-19, venous thromboembolism, time to symptom resolution including fever, time to</p>                                                                                                                                                                                                                                         |

|                                                                                                                                                                                                                                                                                                         |                                                                                                                                                                                                                                                                                                                                                                                                                                                                                                                                                                                                                                                                                                                                                                                |
|---------------------------------------------------------------------------------------------------------------------------------------------------------------------------------------------------------------------------------------------------------------------------------------------------------|--------------------------------------------------------------------------------------------------------------------------------------------------------------------------------------------------------------------------------------------------------------------------------------------------------------------------------------------------------------------------------------------------------------------------------------------------------------------------------------------------------------------------------------------------------------------------------------------------------------------------------------------------------------------------------------------------------------------------------------------------------------------------------|
|                                                                                                                                                                                                                                                                                                         | clinical improvement if the criteria for clinical improvement are not objective).                                                                                                                                                                                                                                                                                                                                                                                                                                                                                                                                                                                                                                                                                              |
| <b>Bias in selection of the reported results</b>                                                                                                                                                                                                                                                        |                                                                                                                                                                                                                                                                                                                                                                                                                                                                                                                                                                                                                                                                                                                                                                                |
| <p>Issues to consider:<br/>Selective reporting of timepoints<br/>Selective reporting of outcome measures</p> <p><i>Note that we are only interested in selective reporting for the outcomes for which we are extracting data.</i></p> <p><i>Note that the judgments may differ across outcomes.</i></p> |                                                                                                                                                                                                                                                                                                                                                                                                                                                                                                                                                                                                                                                                                                                                                                                |
| <b>Definitely low risk of bias</b>                                                                                                                                                                                                                                                                      | Results for outcomes that were analyzed and reported according to a pre-specified statistical analysis plan or protocol (including the timepoint for the measurement of the outcome).                                                                                                                                                                                                                                                                                                                                                                                                                                                                                                                                                                                          |
| <b>Probably low risk of bias</b>                                                                                                                                                                                                                                                                        | <p>Results for outcomes that were analyzed and reported but that were not prespecified in a statistical analysis plan or protocol but the timepoint at which results are reported is consistent with the timepoint for other outcomes in the trial report or there is little reason to believe the outcome was selectively reported.</p> <p>Please note that outcomes that were not prespecified in a protocol or statistical analysis plan and that are reported in the trial preprint or publication should be rated at probably low risk of bias unless there are other important reasons to suspect that results for those outcomes were selectively reported (e.g., results are presented at timepoints that don't match the timepoints reported for other outcomes).</p> |
| <b>Probably high risk of bias</b>                                                                                                                                                                                                                                                                       | Results for outcomes that were analyzed and reported but that were not prespecified in a statistical analysis plan or protocol but the timepoint at which results are reported is not consistent with the timepoint for other outcomes in the trial report or there are other reasons to believe that the outcome is selectively reported.                                                                                                                                                                                                                                                                                                                                                                                                                                     |
| <b>Definitely high risk of bias</b>                                                                                                                                                                                                                                                                     | Results for outcomes that were analyzed and reported for which there are inconsistencies with the statistical analysis plan or protocol. These inconsistencies may include outcome measures of interest or the timepoints for the measurement of outcomes.                                                                                                                                                                                                                                                                                                                                                                                                                                                                                                                     |
| <b>Bias due to competing risks</b>                                                                                                                                                                                                                                                                      |                                                                                                                                                                                                                                                                                                                                                                                                                                                                                                                                                                                                                                                                                                                                                                                |
| <p>Issues to consider:<br/>Competing risks due to early termination (<u>only for continuous outcomes</u>)</p>                                                                                                                                                                                           |                                                                                                                                                                                                                                                                                                                                                                                                                                                                                                                                                                                                                                                                                                                                                                                |
| <b>Definitely low risk of bias</b>                                                                                                                                                                                                                                                                      | <p>Results are very unlikely to have been affected by competing risk due to death.</p> <p>For example, the intervention arm increased the risk of death but the duration of hospitalization is shorter in the control arm.</p>                                                                                                                                                                                                                                                                                                                                                                                                                                                                                                                                                 |
| <b>Probably low risk of bias</b>                                                                                                                                                                                                                                                                        | Results are unlikely to have been affected by competing risk due to death.                                                                                                                                                                                                                                                                                                                                                                                                                                                                                                                                                                                                                                                                                                     |

|                                     |                                                                                                                                                                                                                                                                                                                                                                                                                                                                                                                                                                                                                                                                                                                                                                                                                                           |
|-------------------------------------|-------------------------------------------------------------------------------------------------------------------------------------------------------------------------------------------------------------------------------------------------------------------------------------------------------------------------------------------------------------------------------------------------------------------------------------------------------------------------------------------------------------------------------------------------------------------------------------------------------------------------------------------------------------------------------------------------------------------------------------------------------------------------------------------------------------------------------------------|
|                                     | For example, the intervention arm increased the risk of death but the duration of hospitalization is slightly shorter in the control arm or there is no appreciable difference between arms.                                                                                                                                                                                                                                                                                                                                                                                                                                                                                                                                                                                                                                              |
| <b>Probably high risk of bias</b>   | <p>Results are likely to have been affected by competing risk due to death.</p> <p>For example, the intervention arm increased the risk of death and the duration of hospitalization is appreciably lower in the intervention arm.</p> <p>Note that for outcomes such as ICU length of stay and duration of ventilation in which only patients admitted to the ICU or patients are ventilated may be included in analyses, even small imbalances in deaths across trial arms may lead to bias due to competing risks because patients who die are also likely the ones who were admitted to the ICU or ventilated. While patients who die may make up only a small proportion of the total patients included in the trial, they may make up an appreciable proportion of patients who are admitted to the ICU and who are ventilated.</p> |
| <b>Definitely high risk of bias</b> | <p>Results are very likely to have been affected by competing risk due to death.</p> <p>For example, the intervention arm increased the risk of death and the duration of hospitalization is much lower in the intervention arm.</p>                                                                                                                                                                                                                                                                                                                                                                                                                                                                                                                                                                                                      |
