# Supplementary figures and images for: Drug treatments for covid-19: living systematic review and network meta-analysis
Source: PubMed Central journal article supplement — BMJ. 2020 Jul 30;370:m2980. doi: 10.1136/bmj.m2980 (PMC7390912; doi:10.1136/bmj.m2980), 2020-07-30

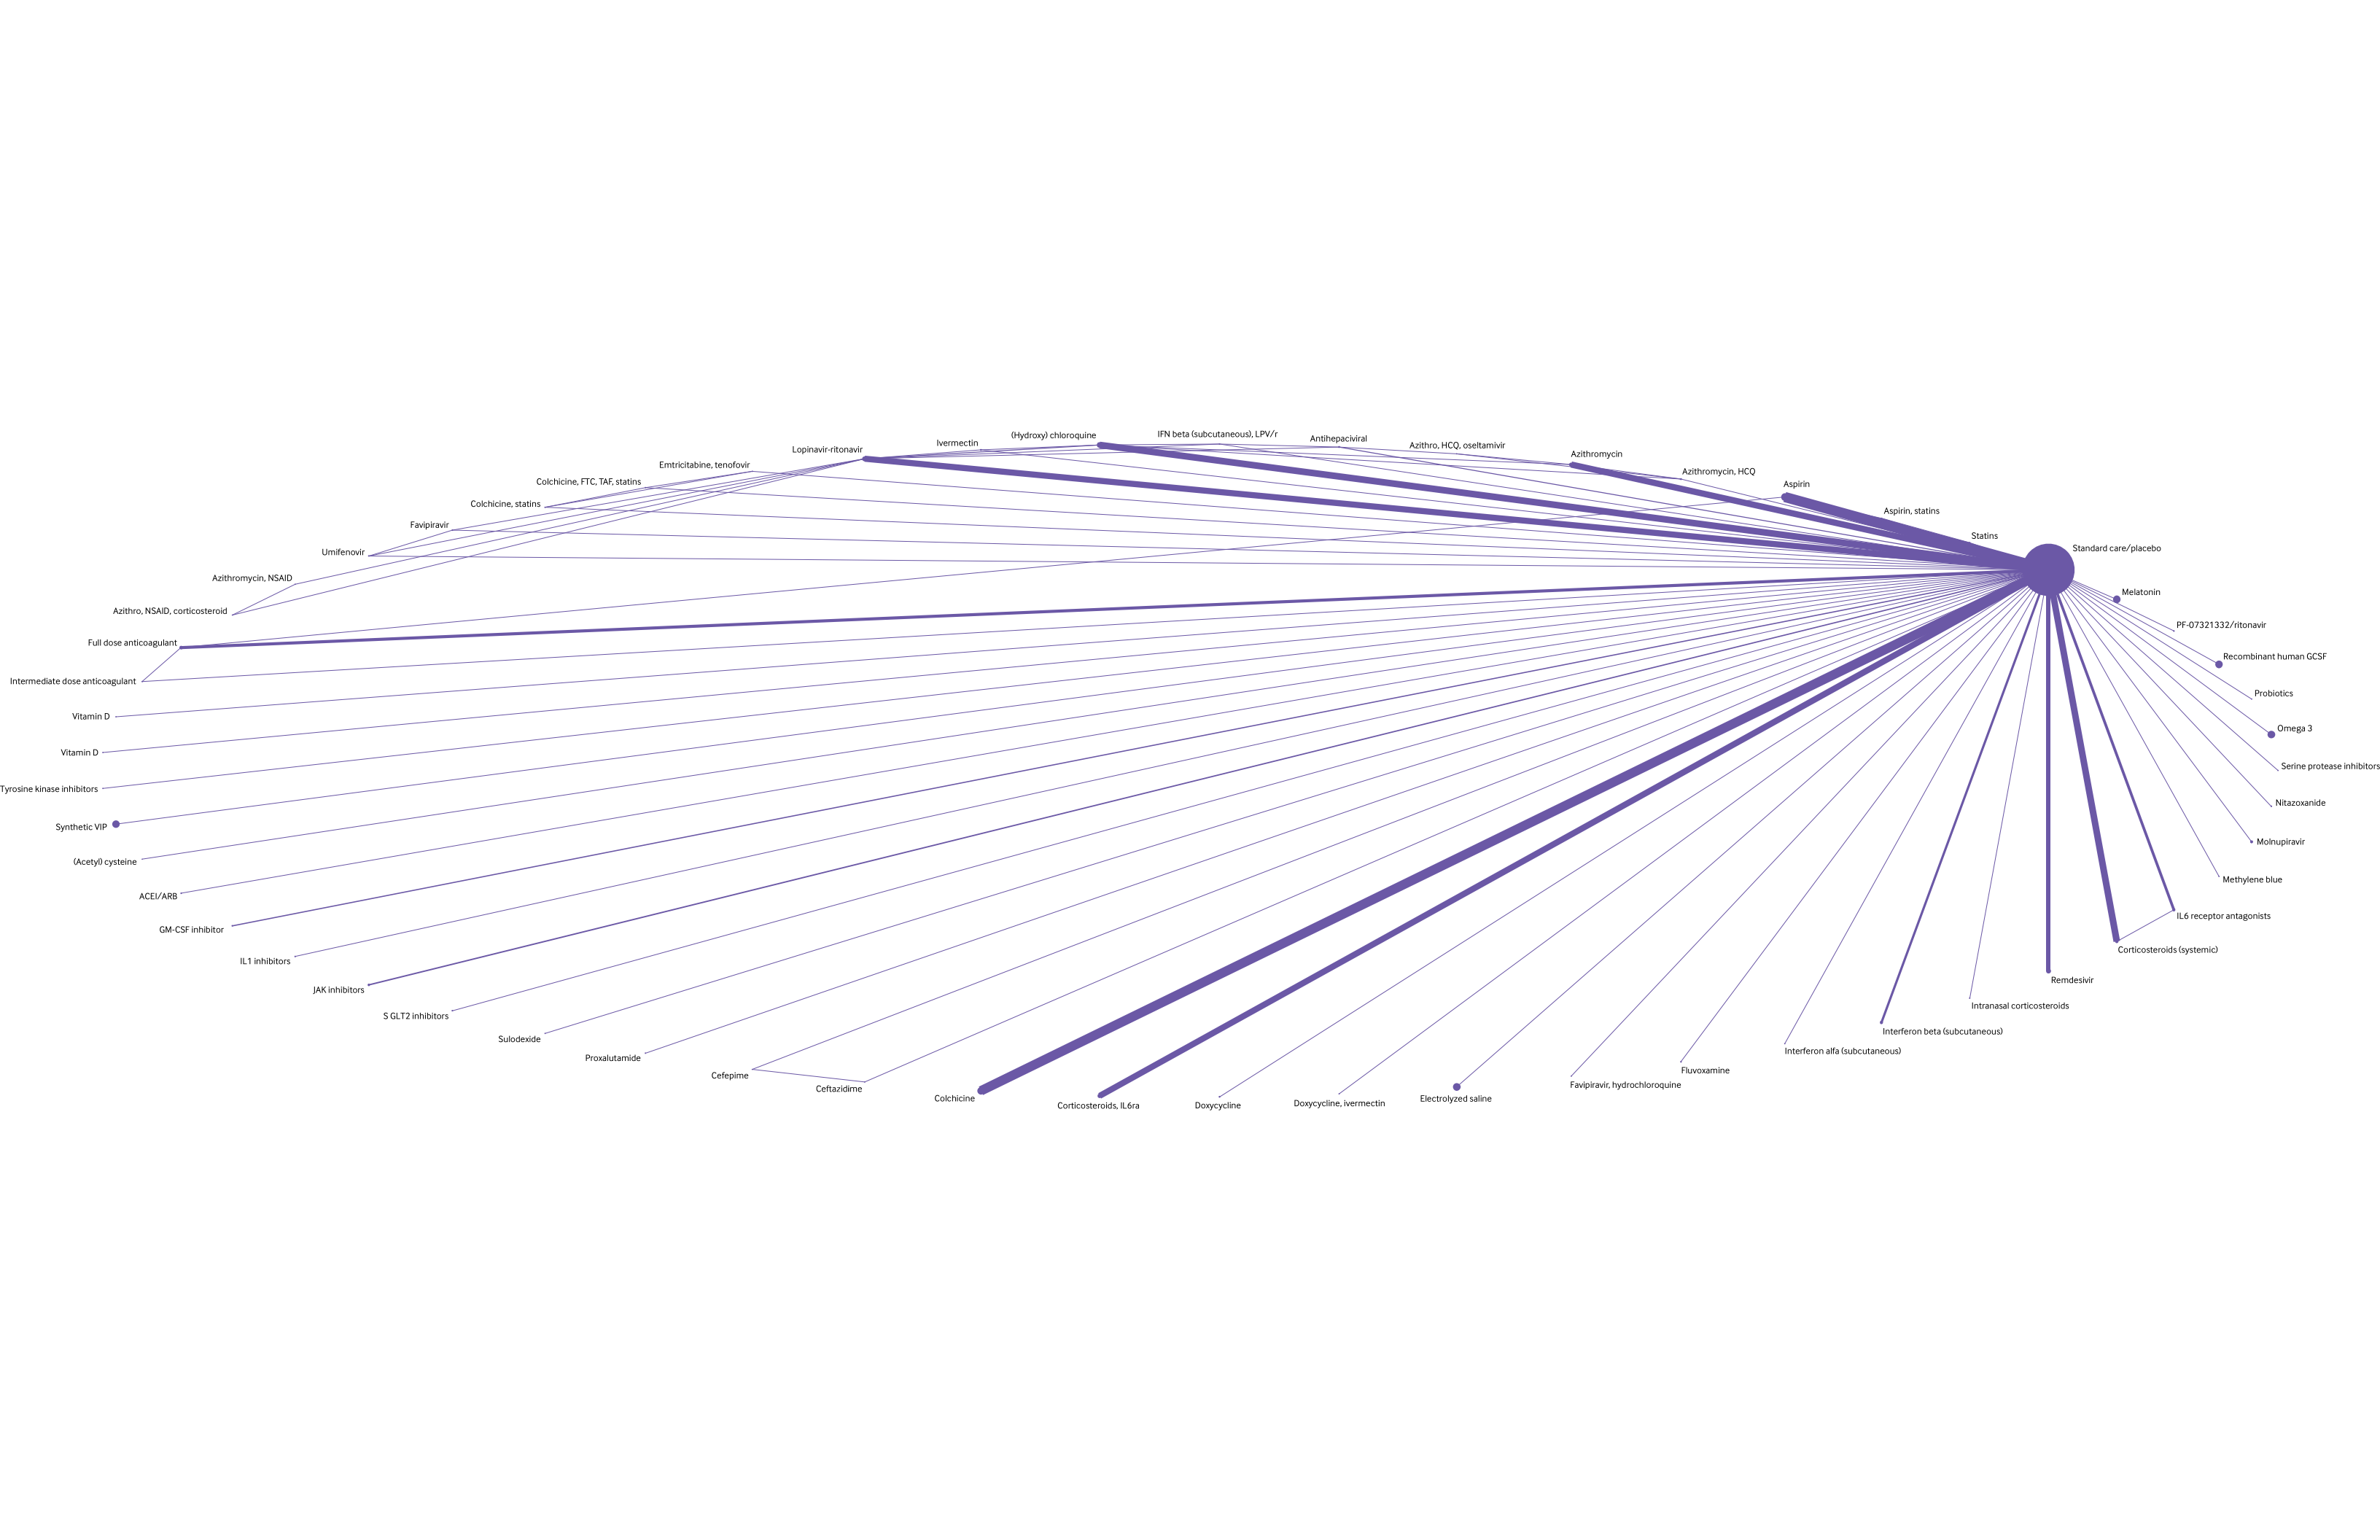

Supplement: sier059724_4.wf1.pdf [file sier059724_4.wf1.pdf]
